# Supplementary material for: NF1 regulates mesenchymal glioblastoma plasticity and aggressiveness through the AP-1 transcription factor FOSL1
Source: eLife. 2021 Aug 17;10:e64846. doi: 10.7554/eLife.64846 (PMC8370767; doi:10.7554/eLife.64846)
Supplement: Figure 1—figure supplement 1—source data 1. [file elife-64846-fig1-figsupp1-data1.xlsx]

## Sheet:  Figure 1-S1A
# Source Data Figure 1-figure supplement 1A
Sample	Dataset	Group	FOSL1	VDR	SP100	ELF4	BNC2	OLIG2	SOX11	ASCL1	SALL2	POU3F3
GSM1194851	GSE49161	MES	0.220174	0.551959	0.114486	-0.217865	1.33283	-0.778505	-1.79656	-0.75804	-0.659599	-0.838563
GSM1194852	GSE49161	Non-MES	-1.07623	-0.398718	-0.214802	-0.734252	-0.690013	0.96585	0.220397	0.851291	1.03669	1.04386
GSM1194853	GSE49161	MES	-0.448792	0.0408159	1.76349	1.93472	0.94408	-1.86167	-0.473766	-1.52062	-0.519109	-0.808334
GSM1194854	GSE49161	MES	0.36462	0.32355	0.873	0.998731	1.55198	-1.44141	-2.41613	-1.52489	-0.964862	-0.97734
GSM1194855	GSE49161	Non-MES	-0.924562	0.198851	-0.611997	-0.464042	-0.92536	0.269991	0.560149	0.686829	0.877119	1.17577
GSM1194856	GSE49161	Non-MES	0.0612834	-0.106107	-0.381367	-0.248393	-1.04827	0.70394	0.708467	-0.182032	-0.46881	0.260662
GSM1194857	GSE49161	Non-MES	1.07963	0.702586	0.465555	0.749956	0.195161	0.492529	0.103554	0.406001	0.579662	0.557452
GSM1194858	GSE49161	Non-MES	-0.586016	-0.714787	-0.633778	-0.447154	-0.485155	0.869559	0.901626	0.529348	0.77999	-0.478567
GSM1194859	GSE49161	Non-MES	-0.111149	-0.714787	-1.25648	-0.239949	0.115124	0.848161	0.634308	0.522366	0.652508	-0.0732278
GSM1194860	GSE49161	Non-MES	0.73657	-0.320935	-0.136644	0.239414	-0.983482	0.0324744	0.240231	0.818709	-0.235527	0.288142
GSM1194862	GSE49161	MES	3.05945	3.44227	2.44769	1.65412	2.08556	-2.06409	-0.992017	-1.5214	-2.52933	-1.88695
GSM1194863	GSE49161	Non-MES	-0.350388	-0.559222	-1.05532	-1.16425	-0.914879	0.947448	0.714072	0.503359	1.46336	0.0806637
GSM1194865	GSE49161	Non-MES	-0.832478	-0.0591904	-1.08991	-0.465341	-0.613787	0.936321	1.26294	0.682174	-0.189565	-0.291699
GSM1194866	GSE49161	Non-MES	-0.648309	-0.345628	-0.911815	-1.33118	-0.586155	0.590959	0.759344	0.818709	0.878853	2.31896
GSM1194867	GSE49161	Non-MES	-0.0768433	-0.439461	0.00429604	-0.610189	-0.043998	-0.463528	0.265238	1.45755	-0.416777	0.813022
GSM1638621	GSE67089	MES	1.23687	0.927582	0.525392	1.12623	0.729921	-1.21834	-1.12974	-0.926616	-1.01631	-1.21309
GSM1638622	GSE67089	MES	1.27568	0.939939	0.387084	1.29511	1.2891	-1.18261	-1.19	-1.01559	-1.16602	-1.18978
GSM1638623	GSE67089	MES	1.23299	0.695893	0.618318	1.18739	2.12787	-1.10472	-1.12127	-0.854551	-0.837172	-1.05578
GSM1638624	GSE67089	Non-MES	-0.695736	-0.845616	-0.95278	-0.952401	-0.884311	0.761159	0.975735	0.935068	1.31001	0.995104
GSM1638625	GSE67089	Non-MES	-0.577859	-0.935202	-1.04787	-0.853716	-0.646924	0.739782	0.964751	0.812291	1.21076	0.815652
GSM1638626	GSE67089	Non-MES	-0.741335	-0.422396	-0.769089	-0.848852	-0.0508184	0.807132	1.10974	0.916385	1.28141	1.08483
GSM1638630	GSE67089	Non-MES	-0.87231	0.529076	-0.856612	-0.718893	-0.356784	1.0329	0.374126	-1.00891	0.0820856	-0.5617
GSM1638633	GSE67089	Non-MES	-0.873765	-1.30282	1.05485	-0.734183	-0.003341	0.590442	0.46953	0.834533	0.0518081	0.946162
GSM1638634	GSE67089	Non-MES	-0.814584	-0.419307	0.850633	-0.804374	0.186569	0.659548	0.56054	0.557838	-0.391421	1.00909
GSM1638635	GSE67089	Non-MES	-0.992128	-1.48508	1.28717	-0.657042	-0.530868	0.680046	0.46953	0.961759	0.442051	1.18038
GSM1638636	GSE67089	MES	1.23639	1.27357	0.795526	0.788482	-0.108846	-1.27924	-1.14732	-0.970211	-1.02977	-0.953232
GSM1638637	GSE67089	MES	1.17575	1.31991	0.656137	0.835045	0.223496	-1.16914	-1.13759	-0.926616	-1.22237	-0.96838
GSM1638638	GSE67089	MES	1.43043	1.5238	0.753385	0.799602	-1.02674	-1.22595	-1.19094	-1.01336	-1.16602	-1.01849
GSM1638639	GSE67089	Non-MES	-0.721446	-1.27501	-0.968988	-0.951706	-1.02147	0.692052	1.10441	0.935958	1.02657	1.29458
GSM1638640	GSE67089	Non-MES	-0.634615	-0.681888	-0.919283	-0.857886	-0.230178	0.687367	1.00053	0.936848	0.971066	1.18155
GSM1638641	GSE67089	Non-MES	-0.761224	-0.919756	-0.857693	-0.976725	-1.1217	0.763501	1.11068	1.03293	1.02153	0.548804
GSM1638642	GSE67089	Non-MES	-0.920334	-0.518161	-1.05651	-0.40616	-0.910687	0.932168	0.814741	0.979108	1.10143	0.774867
GSM1638643	GSE67089	Non-MES	-0.84466	-1.00625	-1.09541	-0.40755	-0.504491	0.954423	0.687954	0.899036	1.15441	0.743405
GSM1638644	GSE67089	Non-MES	-0.7132	-0.811635	-1.10622	-0.991319	-0.1827	0.62031	0.89006	1.47422	0.82893	1.08833
GSM1638645	GSE67089	Non-MES	-0.784023	-0.44711	-0.901995	-0.386701	-0.462289	1.00772	0.759194	0.888359	0.978635	0.78652
GSM1638646	GSE67089	Non-MES	-0.796636	-1.29664	-1.03274	-0.838427	-1.14807	0.78517	1.08495	0.964428	1.109	0.951989
GSM1638647	GSE67089	Non-MES	-0.782568	-1.29664	-1.00465	-1.08236	-0.351509	0.608011	0.998017	1.4284	0.849956	1.0522
GSM1638658	GSE67089	MES	1.27374	1.14383	1.14886	1.59395	-0.17215	-1.20984	-1.16897	-0.982667	-1.07098	-1.22008
GSM1638659	GSE67089	MES	1.28829	0.958474	0.616157	1.48692	1.42626	-1.13342	-1.18749	-0.962649	-1.17779	-0.922935
GSM1638660	GSE67089	MES	1.53472	0.442579	1.12617	1.73711	-0.145773	-1.24967	-1.22766	-1.07564	-1.20303	-1.00334
GSM1638661	GSE67089	MES	0.858986	1.31991	1.45789	1.06299	1.43681	-1.23122	-1.23927	-0.998237	-1.04996	-1.02781
GSM1638662	GSE67089	MES	0.952609	1.18707	1.56055	1.01435	2.30195	-1.175	-1.21573	-0.934623	-1.01884	-0.943909
GSM1638663	GSE67089	MES	0.770699	0.878155	1.37793	1.07481	1.81135	-1.16036	-1.147	-1.02893	-1.2148	-1.05461
GSM198765	GSE8049	MES	0.114994	-0.388897	1.78122	1.05809	1.82551	-0.0319051	-0.113595	-1.32239	-0.156945	-0.630843
GSM198767	GSE8049	Non-MES	-1.78777	-0.67687	-1.7679	-1.16535	-1.04154	1.14138	1.07746	1.59168	1.69863	1.95092
GSM198768	GSE8049	MES	0.836368	-0.0766739	0.150983	-0.320051	1.45684	-1.08823	-0.680828	-0.974128	-1.04241	-0.587929
GSM198769	GSE8049	Non-MES	-0.452807	-0.385866	-0.0294248	-0.360767	-0.701131	1.39338	0.723106	1.51655	0.818036	0.376942
GSM198770	GSE8049	MES	0.0684991	0.908496	1.11699	0.060553	-0.298047	-1.3041	-0.249853	0.0678679	-0.504318	-0.23908
GSM198771	GSE8049	MES	1.4253	0.7054	1.16947	0.684566	1.25038	-0.462291	-0.0439426	-1.00983	-0.73882	-0.334599
GSM198772	GSE8049	Non-MES	-0.56693	-1.63476	-0.936385	-1.01487	-0.783468	0.728158	0.612097	0.94153	1.69863	0.979122
GSM198773	GSE8049	Non-MES	-1.34255	-0.995156	-0.938025	-0.908659	-0.795757	1.32429	0.174157	0.870116	0.504719	1.66298
GSM198774	GSE8049	MES	0.704633	0.826652	0.798812	1.13864	1.16559	-0.781581	0.633429	-1.22918	-0.444963	-0.549168
GSM198775	GSE8049	MES	0.942038	1.14494	-0.37876	2.24593	-0.108795	-1.22552	-2.30025	-1.05992	0.0182015	-0.932625
GSM198776	GSE8049	Non-MES	-0.865624	-0.685964	-1.39232	-0.821032	-0.552432	0.613449	1.14189	0.556637	0.03377	-0.102033
GSM198777	GSE8049	MES	1.01671	1.02065	0.547881	-0.446624	0.640842	-0.661904	-0.757881	0.471311	-1.63109	-1.04614
GSM198778	GSE8049	Non-MES	0.72788	1.06006	0.733209	-0.381124	-1.00959	0.918738	1.14494	0.206986	-0.308738	-0.878637
GSM198779	GSE8049	MES	1.14563	1.70876	0.572482	0.846544	0.889082	-1.50145	0.368313	-0.937493	-1.74299	-1.41991
GSM198780	GSE8049	Non-MES	-0.404198	-0.249458	-1.04463	-0.883875	-0.970262	-0.0450018	0.282554	0.445342	0.525153	-0.334599
GSM198781	GSE8049	Non-MES	-1.59757	-1.00728	-0.549328	-0.88299	-1.10176	1.14771	0.054877	0.800094	0.240054	1.22138
GSM3384803	GSE119834	Non-MES	-1.38053	-1.01313	-1.59794	-0.275263	-0.930254	0.740081	0.636112	0.985579	0.815848	0.232189
GSM3384804	GSE119834	Non-MES	-1.38571	-0.960996	-1.53802	-1.35757	-0.927648	1.18885	0.994663	1.50107	0.889663	0.247336
GSM3384805	GSE119834	Non-MES	-0.748591	-0.94641	-1.57488	-1.18704	-0.85988	1.37818	0.723035	0.959968	0.967225	0.700674
GSM3384806	GSE119834	Non-MES	-0.120956	-0.467853	-0.0195843	-0.392259	-0.384156	0.360576	0.324902	0.507818	-0.248644	0.100777
GSM3384807	GSE119834	Non-MES	0.0959925	-0.52488	-0.947003	-0.746637	-0.869379	0.588703	1.01621	0.764514	1.41339	0.359017
GSM3384808	GSE119834	Non-MES	-0.824754	-0.543583	0.180324	-0.570457	-0.900815	1.05395	0.516282	-0.895088	-0.519281	0.604484
GSM3384809	GSE119834	Non-MES	0.885261	0.387288	-1.02181	-0.11095	-0.919938	0.682057	0.50249	-1.02151	-0.138405	-0.871622
GSM3384810	GSE119834	MES	1.30976	2.12219	0.825101	1.45497	0.672075	-1.48383	-1.79143	-1.0813	-0.661965	-2.45907
GSM3384811	GSE119834	MES	1.22663	1.53543	1.04162	0.903281	0.722076	-1.48108	-1.58839	-1.06384	-0.70645	-0.301765
GSM3384812	GSE119834	MES	1.54703	1.88178	1.05972	1.43011	-0.0695954	-1.27566	-1.37137	-1.07673	-0.911347	-1.8013
GSM3384813	GSE119834	MES	1.00151	0.640443	0.519182	1.70146	1.00722	-0.527876	-0.974162	-1.07993	-0.958799	-0.817031
GSM3384814	GSE119834	Non-MES	-0.770536	-0.915908	0.565171	-1.4933	-0.713344	1.14087	0.426075	1.31715	0.763916	0.815635
GSM3384815	GSE119834	MES	1.18344	1.76131	0.733765	0.327331	1.34369	-0.606033	0.052759	0.0321084	-0.595835	0.158385
GSM3384816	GSE119834	MES	0.738968	0.860311	0.861501	0.345575	-0.128004	-0.259042	0.0237509	-0.891785	-0.645291	-0.193056
GSM3384817	GSE119834	MES	1.54601	1.40284	0.685493	1.48948	1.31924	-1.40536	-1.52229	-1.09372	-1.05099	-1.41197
GSM3384818	GSE119834	MES	0.618623	1.0505	0.924812	0.429908	0.0199525	-0.686898	-1.70715	-1.09372	-0.322785	-0.179394
GSM3384820	GSE119834	MES	0.664424	0.286751	0.75422	-0.254866	2.16936	-1.22325	0.692813	0.68116	0.692236	0.3845
GSM3384821	GSE119834	Non-MES	-0.399358	-0.828444	0.408661	0.938049	0.703413	0.424371	-0.0118701	-1.0333	-0.929376	0.772802
GSM3384822	GSE119834	Non-MES	-1.10009	-0.25508	0.829023	-0.771214	-0.831569	0.412424	0.216178	1.07363	0.51277	0.157607
GSM3384823	GSE119834	Non-MES	0.123725	-0.930564	-1.53876	-1.02073	-0.908249	-0.572482	0.174892	0.948591	0.785914	0.957721
GSM3384824	GSE119834	Non-MES	0.177874	0.264461	0.542558	-1.49856	0.518561	0.441537	-0.283457	0.477954	0.167757	0.557811
GSM3384825	GSE119834	Non-MES	-1.3618	-0.413874	-1.29791	-0.953911	-0.715261	1.16943	1.24259	0.747491	0.321974	0.563485
GSM3384826	GSE119834	MES	-0.170206	0.216785	1.38926	1.27656	0.593806	0.0748308	0.39875	0.141824	-0.499916	0.529153
GSM3384827	GSE119834	MES	-0.165715	-0.0863204	0.345074	-0.3026	1.88757	-1.12204	-0.364612	-0.842638	-1.2137	-0.453432
GSM3384828	GSE119834	Non-MES	-0.551081	-0.24784	0.449809	-0.916415	-0.370759	0.514575	0.613633	1.61427	-0.717266	0.200748
GSM3384829	GSE119834	MES	1.28675	-0.385777	-0.0622492	0.125734	0.502095	-0.432032	1.37779	0.328877	-1.24324	0.137298
GSM3384830	GSE119834	Non-MES	0.266613	-0.737177	0.55735	0.41674	0.163321	0.637762	-0.33639	-0.873105	-0.368388	0.482568
GSM3384831	GSE119834	MES	0.996502	1.02682	1.71718	1.10993	1.93422	-1.48209	-1.70105	-1.06783	-0.883529	-1.48008
GSM3384832	GSE119834	Non-MES	-1.88916	-0.617234	-1.47055	1.02465	-0.863243	-0.875713	1.13405	0.445159	0.199697	0.115429
GSM3384833	GSE119834	MES	0.983935	-0.671795	0.878302	1.64737	0.83187	-1.3004	-0.348889	-1.054	-0.100257	-2.36422
GSM3384834	GSE119834	MES	-0.755843	-0.665475	-0.512093	1.24233	0.638032	-1.48747	-0.485757	-1.06115	-0.399002	0.457024
GSM3384835	GSE119834	Non-MES	-0.806093	-0.674554	-0.511298	0.174611	-0.728574	0.484883	0.486237	0.814752	0.07503	0.642906
GSM3384836	GSE119834	Non-MES	-1.30141	-0.613866	-1.09405	-1.047	-0.703811	1.1723	1.32233	1.36169	0.833293	1.06014
GSM3384837	GSE119834	MES	1.29651	1.37236	0.532285	0.0484338	1.55538	-0.768877	-1.78244	-1.02802	-2.25245	-0.812026
GSM3384838	GSE119834	MES	2.0093	1.59414	1.56677	1.78511	2.23328	-1.46	-1.70167	-1.06797	-0.862697	-1.95505
GSM3384839	GSE119834	Non-MES	-0.862061	-0.971646	-1.42503	-0.063469	-0.886977	-1.4518	1.21561	-1.083	2.8824	0.823919
GSM3384840	GSE119834	Non-MES	-0.883472	-0.968848	-0.821761	-0.492004	-0.935426	1.17291	0.866185	1.46624	1.82679	0.986804
GSM3384842	GSE119834	Non-MES	-1.10929	-0.895602	0.356732	-0.352801	-0.474934	1.09002	0.805575	0.769611	-0.0240799	1.11546
GSM3384843	GSE119834	Non-MES	-0.0610251	-0.832398	-1.14711	-0.517711	-0.913277	1.06497	0.416829	0.872233	1.51841	0.549
GSM3384844	GSE119834	Non-MES	-1.23083	-1.00299	-1.55777	-1.09748	-0.898769	1.25245	1.18274	1.14843	1.32755	0.981501
GSM3384845	GSE119834	Non-MES	-0.65426	-0.923617	0.335472	-1.12258	-0.82604	0.730204	0.48816	1.03804	0.789614	0.936318
GSM3384846	GSE119834	Non-MES	-0.120674	-0.961273	-1.17828	-0.343798	-0.947129	0.622797	0.381156	0.575759	0.695382	0.261497
GSM4075051	Freiburg	MES	1.4939	0.947806	0.760973	0.379575	0.122878	-0.918489	-0.677775	-0.869958	-0.679091	-0.53166
GSM4075052	Freiburg	Non-MES	-0.0699662	0.662969	1.04324	-0.0217569	-0.82775	0.862452	-0.136968	-0.763876	-0.560717	1.49723
GSM4075053	Freiburg	Non-MES	-0.0770214	0.903804	0.536273	0.0952526	-0.507858	1.23281	0.697087	1.50562	0.888244	1.04492
GSM4075055	Freiburg	Non-MES	-0.897635	0.946562	-0.606898	1.18034	1.01518	-0.448568	-0.652016	-0.761205	-0.187945	1.36461
GSM4075056	Freiburg	MES	0.49384	0.545684	0.60904	0.409248	-0.503665	0.90306	0.0319634	-0.852359	-0.916563	1.26495
GSM4075058	Freiburg	MES	1.54794	2.18211	1.2734	0.429435	0.207851	-0.895452	-0.581938	0.130018	-1.0008	0.530137
GSM4075059	Freiburg	Non-MES	-0.39522	0.0414233	0.0278223	0.578134	-0.536126	1.18181	0.166835	0.0672733	-0.239149	2.1237
GSM4075060	Freiburg	MES	0.621373	0.27081	1.72518	0.882042	0.11982	-1.01736	-0.179873	-0.643952	0.0271527	1.29331
GSM4075063	Freiburg	Non-MES	-0.153265	-1.26134	0.497281	-0.665422	-0.665014	0.423829	1.57197	0.585125	0.345702	-0.739865
GSM4075064	Freiburg	Non-MES	-0.906981	-0.547276	-1.48537	1.51557	-1.01365	-1.07164	1.28175	-0.654464	0.590653	-0.880742
GSM4075065	Freiburg	Non-MES	-1.05824	-1.20936	-0.927341	0.0836954	-0.872884	1.35985	1.06124	1.33841	-0.753939	-0.545092
GSM4075066	Freiburg	Non-MES	-1.22534	-1.21525	-1.71189	-1.42773	-0.37623	1.05273	1.23049	0.88015	0.93335	-0.550694
GSM4075067	Freiburg	MES	0.729033	1.20076	0.404493	0.728317	0.467693	-0.735719	-1.34478	-0.920914	0.162303	-1.27038
GSM4075068	Freiburg	MES	1.91635	0.348365	1.42065	-1.26414	2.26076	-1.19011	-0.269853	-0.922374	-1.86817	-0.764173
GSM4075069	Freiburg	MES	0.17392	-0.896981	0.363897	0.586143	0.46851	-1.06121	-1.38933	-0.99593	-0.623595	-1.36424
GSM4075070	Freiburg	Non-MES	-0.126738	-0.920249	-1.55308	-1.24468	-1.02426	1.03384	1.30818	1.43204	2.01386	-0.453049
GSM4075071	Freiburg	Non-MES	-0.794065	-1.00173	-1.05819	0.092308	-1.31957	0.862854	0.411273	1.34698	1.81682	-0.190282
GSM4075072	Freiburg	MES	0.883743	-1.03891	-0.878628	-0.066267	2.34871	-1.10261	-0.485109	-0.912133	-0.606082	-0.834806
GSM4075074	Freiburg	Non-MES	-1.07937	-1.22014	-0.341489	-1.54012	-0.559071	0.726478	1.362	1.52773	1.77142	-0.661885
SRS926534	SRP057855	MES	1.27502	1.05918	0.213159	0.734531	2.4094	-1.23177	-0.752997	0.174299	0.243977	-1.38921
SRS926535	SRP057855	MES	0.173399	-0.234777	0.209281	0.910867	0.349945	0.285091	-1.13509	-0.31986	-0.318036	-0.537113
SRS926536	SRP057855	Non-MES	-0.391813	-0.244438	1.11345	-0.447704	-0.400185	-1.09186	-0.10215	-0.040513	0.0810061	0.895101
SRS926537	SRP057855	Non-MES	-1.42143	-0.414907	0.0668896	-0.147607	-0.730772	0.887657	0.699671	-0.674961	0.748759	1.1791
SRS926538	SRP057855	Non-MES	-1.402	-0.529904	-0.440443	0.531255	-0.337222	-0.156569	0.00150736	1.24571	1.68598	0.866538
SRS926539	SRP057855	MES	1.0431	0.334574	0.753229	0.958512	0.304968	0.0705786	-1.40675	-2.66563	-1.92399	-0.280515
SRS926540	SRP057855	Non-MES	-0.863552	-0.5637	-1.61918	-0.353596	1.38154	0.555423	1.6413	0.377186	0.833018	0.818584
SRS926541	SRP057855	Non-MES	0.263404	-0.59327	0.104754	0.728026	-0.485143	0.928064	1.15988	0.922813	-0.782821	0.593569
SRS926542	SRP057855	Non-MES	0.587458	-0.450554	-1.30217	0.327116	-0.700891	0.775765	0.390128	0.647196	1.2666	-0.0109075
SRS926544	SRP057855	MES	1.29556	0.243503	1.47958	1.01418	-0.749692	-0.942087	-1.14523	-0.10888	-0.388351	-0.904181
SRS926545	SRP057855	MES	1.34504	-0.548225	-0.0176875	0.642866	1.16309	-0.251439	0.265253	0.95608	-0.18419	0.599389
SRS926546	SRP057855	Non-MES	-1.05116	-0.567699	-1.66504	-1.69161	-0.743576	1.82962	1.34539	-0.983144	-1.06705	-0.058209
SRS926547	SRP057855	Non-MES	-0.422661	-0.546687	-0.156919	-1.592	-0.746449	0.157366	0.160082	0.645453	0.761182	0.525947

## Sheet:  Figure 1-S1C 
# Source Data Figure 1-figure supplement 1C
Sample	Developmental_ssGSEA	Injury_ssGSEA	Classical_ssGSEA	Mesenchymal_ssGSEA	Proneural_ssGSEA	Developmental_ssGSEA_pval	Injury_ssGSEA_pval	Classical_ssGSEA_pval	Mesenchymal_ssGSEA_pval	Proneural_ssGSEA_pval	Wang_2017	Richards_2021	FOSL1
BT100_L	4441.68	2407.3	8018	4013.41	3423.76	0.000999	1	0.244755	0.519481	0.000999	PN	DEV	8.62696
BT106_L	3444.74	3341.91	7128.28	5199.46	1715.16	1	0.00699301	0.985015	0.014985	0.717283	MES	INJ	10.9702
BT108_L	3892.35	2954.81	7568.68	4720.48	2250.99	0.000999	1	0.793207	0.0849151	0.215784	MES	DEV	12.5388
BT119_L	3584.97	3142.45	7653.03	4503.36	1721.33	0.925075	1	0.712288	0.173826	0.709291	MES	DEV	11.3877
BT126_L	4907.03	1898.68	8282.82	1406.89	3188.07	0.000999	1	0.0699301	1	0.002997	PN	DEV	10.7679
BT134_L	4644.8	2099.88	7901.9	2186.33	2609.93	0.000999	1	0.383616	1	0.0509491	PN	DEV	6.05389
BT140_L	4571.6	2244.68	8650.76	1377.2	2694.74	0.000999	1	0.003996	1	0.033966	CL	DEV	9.01519
BT143_L	3897.72	2950.69	8727.9	3457.45	1573.47	0.000999	1	0.002997	0.884116	0.816184	CL	DEV	11.3875
BT147_L	4364.4	2402.65	8465.97	2631.92	2188.34	0.000999	1	0.012987	1	0.278721	CL	DEV	9.25508
BT169_L	1892.65	4902.03	7127.67	5992	916.609	1	0.000999	0.985015	0.000999	0.997003	MES	INJ	13.285
BT189_L	4362.31	2284.4	7819.11	1821.23	2439.75	0.000999	1	0.494505	1	0.10989	PN	DEV	7.74926
BT208_L	1910.06	4765.11	5815.87	7091.28	786.849	1	0.000999	1	0.000999	0.998002	MES	INJ	13.9226
BT238_L	5183.81	1566.62	8852.4	475.735	2979.3	0.000999	1	0.001998	1	0.00899101	CL	DEV	7.35836
BT241_L	4621.67	2040.28	8525.12	1393.98	2342.1	0.000999	1	0.00799201	1	0.155844	CL	DEV	8.40296
BT248_L	2163.36	4635.98	6509.12	7286.59	2115.96	1	0.000999	1	0.000999	0.343656	MES	INJ	12.2031
BT284_L	3771.25	2907.51	7795.98	3064.09	1737.98	0.000999	1	0.528472	0.983017	0.696304	CL	DEV	9.89833
BT301_L	4622.43	2146	7746.52	2922.84	2074.87	0.000999	1	0.597403	0.992008	0.386613	PN	DEV	12.1886
BT41_L	4899.23	2013.29	8904.87	2126.53	1924.1	0.000999	1	0.001998	1	0.528472	CL	DEV	10.6392
BT426_L	4815.63	2101.46	7640.98	1909.65	4802.66	0.000999	1	0.725275	1	0.000999	PN	DEV	9.07931
BT428_L	4461.89	2427.84	8216.86	2886.32	1793.98	0.000999	1	0.103896	0.992008	0.65035	CL	DEV	10.2493
BT429_L	4581.65	2327.46	8392.47	2357.79	3579.36	0.000999	1	0.028971	1	0.000999	PN	DEV	8.47997
BT48_L	4804.02	1995.13	8155.72	1953.69	3225.42	0.000999	1	0.12987	1	0.000999	PN	DEV	7.79252
BT50_L	4647.18	1947.81	8850.72	342.863	2058.69	0.000999	1	0.001998	1	0.400599	CL	DEV	5.58962
BT53_L	4355.21	2107.63	7727.79	1251.89	1645.28	0.000999	1	0.625375	1	0.773227	CL	DEV	7.09859
BT67_L	4505.39	2288.92	8202.95	2002.61	2628.91	0.000999	1	0.106893	1	0.0499501	PN	DEV	9.12967
BT69_L	5007.41	1603.62	8404.83	1660.5	2670.52	0.000999	1	0.025974	1	0.042957	CL	DEV	9.00353
BT73_L	3675.9	2823.98	7804.32	2991.47	1347.7	0.0919081	1	0.513487	0.987013	0.928072	CL	DEV	11.1124
BT75_L	4123.58	2749.67	8431.31	3053.39	1030.35	0.000999	1	0.018981	0.983017	0.991009	CL	DEV	11.8005
BT84_L	4297.48	2646.73	7722.61	2984.55	1747.43	0.000999	1	0.631369	0.987013	0.692308	CL	DEV	9.93351
BT89_L	4929.68	1844.66	7705.79	2368.23	2751.49	0.000999	1	0.646354	1	0.024975	PN	DEV	11.1218
BT94_L	4360.78	2496.26	8269.8	3109.1	1771.74	0.000999	1	0.0769231	0.978022	0.673327	CL	DEV	11.4607
G361_L	3102.8	3679.27	6406.45	5547.27	2071.56	1	0.000999	1	0.002997	0.38961	MES	INJ	12.5901
G411_L	2806.14	3987.01	6686.45	6052.17	1827.93	1	0.000999	1	0.000999	0.617383	MES	INJ	13.5316
G489_L	4534.87	2207.96	9127.53	1604.66	1914.71	0.000999	1	0.000999	1	0.533467	CL	DEV	9.2485
G498_L	3436.18	3404.58	8409.08	3985.07	1194.75	1	0.000999	0.025974	0.54046	0.965035	CL	INJ	11.944
G523_L	4546.32	2282.61	7398.15	2464.71	4123.76	0.000999	1	0.91009	1	0.000999	PN	DEV	9.50935
G549_L	2526.71	4568.23	7804.48	5965.26	1343.39	1	0.000999	0.513487	0.000999	0.928072	MES	INJ	12.5525
G551_L	3166.6	3800.35	7936.16	4807.78	1634.87	1	0.000999	0.336663	0.0549451	0.779221	MES	INJ	12.2079
G561_L	2802.72	4000.27	7014.2	5309.7	1257.29	1	0.000999	0.996004	0.00799201	0.95005	MES	INJ	12.1646
G564_L	2204.21	4648.68	7234.59	5489.88	968.281	1	0.000999	0.964036	0.002997	0.996004	MES	INJ	12.9687
G566_L	2249.51	4765.89	7360.99	7286.41	933.612	1	0.000999	0.924076	0.000999	0.997003	MES	INJ	13.6784
G567_L	2401.5	4400.73	6041.38	7047.65	1687.26	1	0.000999	1	0.000999	0.739261	MES	INJ	14.9271
G571_L	2974.7	3812.08	7669.96	5444.61	1204.79	1	0.000999	0.694306	0.003996	0.962038	MES	INJ	13.2925
G577_L	3020.1	3938.98	7697.25	4632.48	554.529	1	0.000999	0.662338	0.120879	1	MES	INJ	11.6474
G583_L	2808.2	4290.52	6777.33	6498.92	3500.1	1	0.000999	0.999001	0.000999	0.000999	MES	INJ	12.8966
G584_L	3189.79	3778.62	7577.93	5257.6	1920.03	1	0.000999	0.785215	0.00999001	0.529471	MES	INJ	11.0695
G594_L	3194.3	3684.92	7503.56	4091.44	1508.33	1	0.000999	0.849151	0.447552	0.854146	MES	INJ	11.7316
G613_L	3028.96	3816.39	7237.92	5434.67	1503.97	1	0.000999	0.961039	0.003996	0.857143	MES	INJ	12.8971
G620_L	4611.53	2471.96	9281.88	2384.84	2195.76	0.000999	1	0.000999	1	0.272727	CL	DEV	10.2045
G637_L	3847.22	3163.15	7819.52	3367.86	2160.05	0.000999	0.998002	0.494505	0.923077	0.305694	PN	DEV	12.103
G648_L	4380.84	2489.02	8995.9	2443.65	1480.56	0.000999	1	0.000999	1	0.867133	CL	DEV	7.44897
G683_L	2992.84	4113.26	8482	5935.36	25.8378	1	0.000999	0.010989	0.000999	1	MES	INJ	12.6922
G691_L	2304.82	4794.59	8115.64	6007.15	640.362	1	0.000999	0.15984	0.000999	1	MES	INJ	13.2388
G702_L	4299.82	2621.04	8784.87	3095.9	2276.28	0.000999	1	0.001998	0.979021	0.198801	CL	DEV	10.197
G705_L	2492.23	4341.01	7290.33	5805.91	562.194	1	0.000999	0.945055	0.000999	1	MES	INJ	11.2946
G706_L	4232.81	2781.76	8834.6	2926.02	1904.05	0.000999	1	0.001998	0.992008	0.546454	CL	DEV	11.0533
G719_L	3381.39	3484.32	8030.03	3549.64	1771.71	1	0.000999	0.230769	0.846154	0.673327	CL	INJ	10.5497
G729_L	1736.52	5250.55	6852.31	8218.61	1535.29	1	0.000999	0.999001	0.000999	0.841159	MES	INJ	14.4572
G744_L	5217.25	1544	7641.33	544.174	3913.82	0.000999	1	0.724276	1	0.000999	PN	DEV	8.01419
G789_L	1366.52	5532.26	5475.92	8037.34	1404.49	1	0.000999	1	0.000999	0.903097	MES	INJ	14.3498
G797_L	2572.2	4420.63	7838.09	6446.07	1445.71	1	0.000999	0.45954	0.000999	0.885115	MES	INJ	13.9902
G799_L	2757.99	4067.27	7927.1	5073.32	1234.08	1	0.000999	0.352647	0.01998	0.954046	MES	INJ	11.2615
G800_L	2762.75	4440.74	8268.95	7003.95	1774.31	1	0.000999	0.0769231	0.000999	0.668332	MES	INJ	13.3864
G809_L	4078.01	2657.75	8378.98	2732.47	3743.51	0.000999	1	0.02997	0.999001	0.000999	PN	DEV	9.49956
G823_L	4009.21	2913.29	8186.56	3651.31	1683.18	0.000999	1	0.113886	0.785215	0.742258	CL	DEV	11.0385
G828_L	4068.35	2957.52	8457.42	3428.99	2488.41	0.000999	1	0.014985	0.899101	0.0869131	CL	DEV	11.2045
G837_L	2015.02	4621.52	6415.81	6378.53	1621.53	1	0.000999	1	0.000999	0.789211	MES	INJ	14.5158
G851_L	2558.33	4193.74	7316.25	5723.53	1004.89	1	0.000999	0.94006	0.001998	0.993007	MES	INJ	12.6773
G861_L	2078.35	4953.94	7394.79	6958.77	1311.5	1	0.000999	0.91009	0.000999	0.935065	MES	INJ	13.9588
G876_L	2964.12	4020.19	7710.34	5444.21	1040.28	1	0.000999	0.642358	0.003996	0.991009	MES	INJ	12.9172
G885_L	3850.44	2829.98	8074.85	2499.48	2109.02	0.000999	1	0.184815	1	0.350649	CL	DEV	12.597
G895_L	4158.44	2596.77	8099.1	2468.91	2116.51	0.000999	1	0.171828	1	0.342657	CL	DEV	10.0446

## Sheet:  Figure 1-S1D
# Source Data Figure 1-figure supplement 1D
NAME	PC1	PC2	Sample.ID	Patient.ID	Sample.Type	Richards_DEV_2021_ssGSEA	Richards_INJ_2021_ssGSEA	Wang_MES_2017_ssGSEA	Wang_PN_2017_ssGSEA	Wang_CL_2017_ssGSEA
BTSC_BT127_L_AAACCTGCACGGACAA	-12.7289	-0.553863	BT127_L	BT127	GSC	0.305587	0.186515	0.411803	0.425669	0.127557
BTSC_BT127_L_AAACCTGCATCCGGGT	0.942554	1.60799	BT127_L	BT127	GSC	0.277643	0.182383	0.417528	0.585474	0.204248
BTSC_BT127_L_AAACCTGGTACAGTTC	4.22372	17.3566	BT127_L	BT127	GSC	0.43522	0.212071	0.473999	0.380767	0.394602
BTSC_BT127_L_AAACCTGTCTACGAGT	-14.3647	12.1673	BT127_L	BT127	GSC	0.438068	0.288326	0.371597	0.451613	0.350253
BTSC_BT127_L_AAACGGGAGTGGTAAT	7.01783	23.3358	BT127_L	BT127	GSC	0.396929	0.311844	0.293837	0.470622	0.547183
BTSC_BT127_L_AAACGGGCAGGACGTA	-14.798	-8.7067	BT127_L	BT127	GSC	0.2899	0.215619	0.432632	0.412935	0.287763
BTSC_BT127_L_AAACGGGCATTGCGGC	-7.66853	12.8301	BT127_L	BT127	GSC	0.362149	0.267304	0.429865	0.481317	0.188923
BTSC_BT127_L_AAACGGGCATTGGTAC	-8.86602	6.50831	BT127_L	BT127	GSC	0.309896	0.222225	0.45889	0.402977	0.266938
BTSC_BT127_L_AAACGGGGTAGAAAGG	-12.2646	-3.45384	BT127_L	BT127	GSC	0.309028	0.182319	0.41882	0.450767	0.261037
BTSC_BT127_L_AAACGGGGTTCCATGA	5.55644	18.6964	BT127_L	BT127	GSC	0.472025	0.286167	0.377541	0.406547	0.377425
BTSC_BT127_L_AAACGGGTCAGAGCTT	0.315714	17.8603	BT127_L	BT127	GSC	0.464401	0.272145	0.400961	0.449484	0.550303
BTSC_BT127_L_AAAGCAAAGGTGCTAG	-11.786	-4.48515	BT127_L	BT127	GSC	0.295645	0.199131	0.50626	0.426201	0.216743
BTSC_BT127_L_AAAGCAATCAGCAACT	-10.3305	12.1176	BT127_L	BT127	GSC	0.460538	0.233254	0.443337	0.307947	0.480003
BTSC_BT127_L_AAAGTAGAGCCGTCGT	-1.89408	12.3432	BT127_L	BT127	GSC	0.492365	0.219161	0.398309	0.266203	0.588031
BTSC_BT127_L_AAAGTAGCAAGGTGTG	-13.6067	-2.61226	BT127_L	BT127	GSC	0.307954	0.2077	0.412962	0.346495	0.224606
BTSC_BT127_L_AAAGTAGCATGCCACG	-3.31805	14.3391	BT127_L	BT127	GSC	0.416604	0.296654	0.461395	0.435037	0.494175
BTSC_BT127_L_AAATGCCCAGGAATGC	-9.86994	8.86147	BT127_L	BT127	GSC	0.326469	0.231377	0.46407	0.395505	0.272091
BTSC_BT127_L_AAATGCCGTCCCTACT	-5.85496	12.0622	BT127_L	BT127	GSC	0.386654	0.2354	0.395889	0.387809	0.393685
BTSC_BT127_L_AAATGCCTCCCAAGTA	-6.98064	6.70303	BT127_L	BT127	GSC	0.408457	0.300938	0.432077	0.481607	0.541574
BTSC_BT127_L_AACACGTAGACGCAAC	-16.187	28.4547	BT127_L	BT127	GSC	0.467006	0.194495	0.418223	0.687695	0.344594
BTSC_BT127_L_AACACGTAGACTGTAA	-7.14248	7.27106	BT127_L	BT127	GSC	0.339864	0.322189	0.537144	0.423766	0.399953
BTSC_BT127_L_AACACGTAGAGCCTAG	-5.10078	17.9129	BT127_L	BT127	GSC	0.46712	0.19349	0.401023	0.450364	0.419046
BTSC_BT127_L_AACACGTAGGGTCGAT	-12.4543	10.712	BT127_L	BT127	GSC	0.412267	0.215309	0.388384	0.431061	0.455654
BTSC_BT127_L_AACCATGCATAACCTG	-20.4604	10.7729	BT127_L	BT127	GSC	0.413767	0.168942	0.484436	0.468353	0.265744
BTSC_BT127_L_AACCGCGGTTTGTTTC	-5.03406	8.39548	BT127_L	BT127	GSC	0.403136	0.265098	0.381529	0.498109	0.478246
BTSC_BT127_L_AACCGCGTCTTAGAGC	-11.5467	6.47971	BT127_L	BT127	GSC	0.43383	0.198692	0.436109	0.356669	0.62825
BTSC_BT127_L_AACGTTGGTCATACTG	-3.05487	17.0785	BT127_L	BT127	GSC	0.452134	0.234775	0.346606	0.443895	0.417292
BTSC_BT127_L_AACTCAGCACCCATGG	-13.8833	0.976184	BT127_L	BT127	GSC	0.296277	0.249068	0.489732	0.367859	0.243123
BTSC_BT127_L_AACTCCCAGAGGTTAT	-10.083	1.38186	BT127_L	BT127	GSC	0.313326	0.219265	0.517285	0.449428	0.278119
BTSC_BT127_L_AACTCCCAGCCACGTC	-15.6162	3.08957	BT127_L	BT127	GSC	0.321448	0.201014	0.477078	0.369126	0.421182
BTSC_BT127_L_AACTCCCGTTACGCGC	-14.3539	9.61171	BT127_L	BT127	GSC	0.46547	0.313444	0.428041	0.426863	0.347757
BTSC_BT127_L_AACTCTTTCACGGTTA	-7.35166	11.2371	BT127_L	BT127	GSC	0.436805	0.208976	0.442133	0.573005	0.457651
BTSC_BT127_L_AACTCTTTCTGAGGGA	-13.8832	-10.1192	BT127_L	BT127	GSC	0.305505	0.205086	0.476187	0.373066	0.273263
BTSC_BT127_L_AACTGGTCATTGGGCC	-6.61332	10.7797	BT127_L	BT127	GSC	0.540567	0.274072	0.342851	0.3489	0.602984
BTSC_BT127_L_AACTGGTGTTTGTGTG	-13.453	9.46632	BT127_L	BT127	GSC	0.326635	0.283447	0.490905	0.375807	0.635499
BTSC_BT127_L_AACTTTCAGCGAGAAA	-13.8402	11.7233	BT127_L	BT127	GSC	0.495153	0.269355	0.421196	0.352225	0.559612
BTSC_BT127_L_AACTTTCCAGTCTTCC	0.941211	18.3895	BT127_L	BT127	GSC	0.454784	0.23366	0.397453	0.395277	0.580334
BTSC_BT127_L_AAGACCTCAAGCCATT	-16.6218	9.2138	BT127_L	BT127	GSC	0.334663	0.201902	0.468798	0.277631	0.396687
BTSC_BT127_L_AAGACCTCACAAGCCC	0.116621	14.1977	BT127_L	BT127	GSC	0.472094	0.273424	0.385586	0.362227	0.658199
BTSC_BT127_L_AAGACCTGTACAAGTA	0.330725	13.4514	BT127_L	BT127	GSC	0.374122	0.27143	0.400836	0.348783	0.443724
BTSC_BT127_L_AAGACCTTCAAGAAGT	-9.84631	13.1461	BT127_L	BT127	GSC	0.492655	0.310227	0.443651	0.436243	0.392564
BTSC_BT127_L_AAGACCTTCATCGGAT	-9.09319	7.02008	BT127_L	BT127	GSC	0.29159	0.324683	0.497445	0.434942	0.403675
BTSC_BT127_L_AAGCCGCCAATGTAAG	-22.1823	14.5911	BT127_L	BT127	GSC	0.354344	0.183836	0.35544	0.456499	0.390097
BTSC_BT127_L_AAGCCGCGTCAATACC	-11.1532	17.4956	BT127_L	BT127	GSC	0.485944	0.208987	0.358714	0.532103	0.523951
BTSC_BT127_L_AAGGAGCAGACTGTAA	-2.93704	15.1965	BT127_L	BT127	GSC	0.42113	0.283972	0.310983	0.62676	0.460266
BTSC_BT127_L_AAGGAGCCAACCGCCA	-8.54203	19.7039	BT127_L	BT127	GSC	0.35674	0.246631	0.435324	0.500229	0.551231
BTSC_BT127_L_AAGGAGCCAAGCTGAG	-11.701	12.6156	BT127_L	BT127	GSC	0.365132	0.244203	0.386131	0.422072	0.49763
BTSC_BT127_L_AAGGAGCCAGTATGCT	-13.2418	-7.8933	BT127_L	BT127	GSC	0.28654	0.200974	0.420487	0.413971	0.381849
BTSC_BT127_L_AAGGCAGAGAGACTTA	-6.50608	13.4014	BT127_L	BT127	GSC	0.437913	0.213778	0.408406	0.632933	0.22796
BTSC_BT127_L_AAGGCAGCATTGGCGC	-5.9253	10.6359	BT127_L	BT127	GSC	0.415591	0.218537	0.476315	0.468995	0.353666
BTSC_BT127_L_AAGGCAGGTAAGTAGT	-7.60951	1.27815	BT127_L	BT127	GSC	0.327272	0.217415	0.486042	0.566887	0.227598
BTSC_BT127_L_AAGGCAGGTCATATCG	-4.45064	11.3824	BT127_L	BT127	GSC	0.494749	0.229015	0.313139	0.399378	0.598301
BTSC_BT127_L_AAGGCAGGTCCGCTGA	-8.10005	8.29876	BT127_L	BT127	GSC	0.433121	0.360116	0.39184	0.308032	0.520412
BTSC_BT127_L_AAGGCAGGTGCCTGCA	-9.11024	8.95294	BT127_L	BT127	GSC	0.358535	0.19419	0.361382	0.430849	0.406973
BTSC_BT127_L_AAGGCAGTCCTGCTTG	-2.74005	13.0273	BT127_L	BT127	GSC	0.410517	0.275461	0.527464	0.337373	0.572679
BTSC_BT127_L_AAGGCAGTCGGCGGTT	-7.33896	4.16305	BT127_L	BT127	GSC	0.275834	0.206326	0.487155	0.52426	0.242591
BTSC_BT127_L_AAGGTTCCAATAGCGG	-15.6696	20.2329	BT127_L	BT127	GSC	0.413057	0.195738	0.449422	0.439448	0.461725
BTSC_BT127_L_AAGGTTCCACATTTCT	-13.9643	4.87633	BT127_L	BT127	GSC	0.336562	0.213088	0.402744	0.330481	0.229456
BTSC_BT127_L_AAGGTTCCATGCTAGT	-12.9092	9.23631	BT127_L	BT127	GSC	0.346116	0.220822	0.374754	0.370998	0.406534
BTSC_BT127_L_AAGGTTCGTCGTCTTC	1.02411	19.279	BT127_L	BT127	GSC	0.330458	0.266706	0.415798	0.443346	0.390469
BTSC_BT127_L_AAGGTTCTCAAACCAC	-7.98054	13.9615	BT127_L	BT127	GSC	0.34895	0.196888	0.456132	0.333285	0.3016
BTSC_BT127_L_AAGGTTCTCTTGAGGT	-13.0736	-7.46277	BT127_L	BT127	GSC	0.286609	0.213455	0.461962	0.413713	0.291357
BTSC_BT127_L_AAGTCTGCAACACCTA	-19.5615	13.2858	BT127_L	BT127	GSC	0.410654	0.237039	0.488832	0.378742	0.623816
BTSC_BT127_L_AAGTCTGCAGCCTATA	-10.0906	10.1475	BT127_L	BT127	GSC	0.330725	0.221928	0.478036	0.426595	0.415547
BTSC_BT127_L_AATCCAGAGACAATAC	1.36723	13.1058	BT127_L	BT127	GSC	0.382025	0.256134	0.387783	0.377973	0.638748
BTSC_BT127_L_AATCCAGAGTACGCGA	-10.2397	10.8272	BT127_L	BT127	GSC	0.461052	0.205128	0.346054	0.380226	0.540663
BTSC_BT127_L_AATCCAGGTCATATCG	-1.46074	16.1609	BT127_L	BT127	GSC	0.355565	0.279972	0.463177	0.362874	0.289899
BTSC_BT127_L_AATCCAGGTTGTCTTT	-6.9242	2.89324	BT127_L	BT127	GSC	0.313694	0.190597	0.385954	0.502903	0.332617
BTSC_BT127_L_AATCGGTAGAGTCGGT	-12.8721	12.6371	BT127_L	BT127	GSC	0.380879	0.171039	0.390493	0.560666	0.425288
BTSC_BT127_L_AATCGGTCATGTTGAC	-6.89198	9.67307	BT127_L	BT127	GSC	0.297592	0.272603	0.445688	0.363635	0.253774
BTSC_BT127_L_ACACCAAGTAAAGTCA	4.23111	18.7377	BT127_L	BT127	GSC	0.445148	0.240945	0.470762	0.433631	0.604098
BTSC_BT127_L_ACACCAAGTATAATGG	1.59204	14.8142	BT127_L	BT127	GSC	0.452909	0.23664	0.333198	0.366813	0.305368
BTSC_BT127_L_ACACCAATCCACTGGG	-4.69785	17.6838	BT127_L	BT127	GSC	0.360974	0.233143	0.44816	0.573133	0.366093
BTSC_BT127_L_ACACCAATCTGCGGCA	-9.19401	11.5028	BT127_L	BT127	GSC	0.423781	0.180265	0.375628	0.372446	0.273519
BTSC_BT127_L_ACACCCTAGGATATAC	4.09817	8.50787	BT127_L	BT127	GSC	0.425526	0.353294	0.48057	0.2971	0.429554
BTSC_BT127_L_ACACCCTGTTAAGGGC	-16.9659	-14.9998	BT127_L	BT127	GSC	0.281868	0.194874	0.46106	0.376394	0.238472
BTSC_BT127_L_ACACCCTTCCAAACTG	-14.1015	-9.7001	BT127_L	BT127	GSC	0.283813	0.193227	0.441935	0.463062	0.391516
BTSC_BT127_L_ACACCCTTCTGATACG	-13.7188	-7.42742	BT127_L	BT127	GSC	0.274724	0.204915	0.455931	0.398489	0.144399
BTSC_BT127_L_ACACCGGAGACTGGGT	-8.58204	14.9132	BT127_L	BT127	GSC	0.431193	0.242321	0.497255	0.453041	0.413498
BTSC_BT127_L_ACACCGGAGTGAAGTT	-7.11768	13.9955	BT127_L	BT127	GSC	0.450592	0.226648	0.387518	0.421564	0.601388
BTSC_BT127_L_ACACCGGGTAGAGGAA	4.51713	12.8163	BT127_L	BT127	GSC	0.412128	0.336302	0.438743	0.375025	0.560652
BTSC_BT127_L_ACACCGGTCGTGGTCG	-4.39625	1.26758	BT127_L	BT127	GSC	0.343472	0.161431	0.435792	0.555641	0.16589
BTSC_BT127_L_ACACTGAAGTGCAAGC	-9.86288	10.2422	BT127_L	BT127	GSC	0.402408	0.209993	0.455108	0.409009	0.472605
BTSC_BT127_L_ACAGCCGCACGTGAGA	-0.233071	18.2372	BT127_L	BT127	GSC	0.421128	0.164191	0.334366	0.431007	0.358014
BTSC_BT127_L_ACAGCCGGTAGAGTGC	-13.8358	13.3611	BT127_L	BT127	GSC	0.437106	0.271783	0.389484	0.562609	0.50557
BTSC_BT127_L_ACAGCCGTCTCCAACC	-0.571862	5.41868	BT127_L	BT127	GSC	0.315265	0.29697	0.504554	0.515811	0.283535
BTSC_BT127_L_ACAGCTACATCGGTTA	-7.67866	13.084	BT127_L	BT127	GSC	0.474863	0.257754	0.385874	0.463883	0.503242
BTSC_BT127_L_ACATACGCAGCCAATT	0.340667	23.0266	BT127_L	BT127	GSC	0.554503	0.148159	0.375646	0.552872	0.390254
BTSC_BT127_L_ACATCAGCAGCCAATT	-9.71929	10.3269	BT127_L	BT127	GSC	0.342241	0.267935	0.429439	0.497506	0.358972
BTSC_BT127_L_ACATCAGTCCTTGACC	-10.3636	1.31615	BT127_L	BT127	GSC	0.377022	0.316421	0.477282	0.367112	0.454253
BTSC_BT127_L_ACATGGTCAAGCTGTT	-5.66188	14.2044	BT127_L	BT127	GSC	0.367701	0.233647	0.434815	0.518267	0.434479
BTSC_BT127_L_ACCAGTACATGGTCTA	-2.02647	13.3783	BT127_L	BT127	GSC	0.440908	0.261867	0.367173	0.409268	0.396261
BTSC_BT127_L_ACCAGTAGTAGGGACT	-7.49638	0.09143	BT127_L	BT127	GSC	0.304618	0.413466	0.578601	0.304475	0.325636
BTSC_BT127_L_ACCAGTAGTATCACCA	-16.7948	10.919	BT127_L	BT127	GSC	0.338818	0.258426	0.386633	0.378282	0.437555
BTSC_BT127_L_ACCAGTATCCTATGTT	-19.2745	-4.42259	BT127_L	BT127	GSC	0.319446	0.178911	0.466659	0.529772	0.305426
BTSC_BT127_L_ACCAGTATCGCGTAGC	-11.0013	10.017	BT127_L	BT127	GSC	0.42845	0.23788	0.444249	0.264932	0.40947
BTSC_BT127_L_ACCAGTATCTAAGCCA	-9.46441	22.1006	BT127_L	BT127	GSC	0.359888	0.178405	0.3523	0.505294	0.33075
BTSC_BT127_L_ACCCACTAGTGTGAAT	-11.364	8.37452	BT127_L	BT127	GSC	0.474592	0.288831	0.429543	0.317749	0.467892
BTSC_BT127_L_ACCCACTCACGAGGTA	-9.92047	8.07237	BT127_L	BT127	GSC	0.33192	0.202286	0.418621	0.375188	0.267346
BTSC_BT127_L_ACCCACTGTAAATACG	-20.2894	-1.15394	BT127_L	BT127	GSC	0.372222	0.145139	0.383725	0.321321	0.284533
BTSC_BT127_L_ACCCACTGTTCTGGTA	-14.1657	19.3506	BT127_L	BT127	GSC	0.446504	0.274625	0.418661	0.53329	0.38975
BTSC_BT127_L_ACCCACTTCTAGAGTC	-14.2183	11.4487	BT127_L	BT127	GSC	0.373907	0.32433	0.493853	0.346092	0.527364
BTSC_BT127_L_ACCGTAATCTCGGACG	-2.05312	8.89147	BT127_L	BT127	GSC	0.364415	0.301554	0.442374	0.359099	0.4149
BTSC_BT127_L_ACCTTTAGTCAAAGCG	-12.2216	8.50284	BT127_L	BT127	GSC	0.345816	0.224318	0.400535	0.598822	0.45448
BTSC_BT127_L_ACCTTTATCAGAGACG	1.92462	16.4801	BT127_L	BT127	GSC	0.468225	0.222904	0.408585	0.483452	0.551005
BTSC_BT127_L_ACGAGCCAGAGAACAG	-1.43775	11.811	BT127_L	BT127	GSC	0.422397	0.308209	0.530456	0.366471	0.386009
BTSC_BT127_L_ACGAGCCCACAAGCCC	-13.4751	19.0578	BT127_L	BT127	GSC	0.392269	0.231586	0.406819	0.395424	0.364981
BTSC_BT127_L_ACGAGCCCAGCGATCC	-12.0836	10.6356	BT127_L	BT127	GSC	0.469763	0.265151	0.390648	0.378595	0.431371
BTSC_BT127_L_ACGAGCCTCTCGTATT	-11.9083	4.84846	BT127_L	BT127	GSC	0.322473	0.246655	0.43755	0.44676	0.287104
BTSC_BT127_L_ACGAGGACAGCGTTCG	-9.86075	10.3523	BT127_L	BT127	GSC	0.321874	0.223983	0.428269	0.48532	0.491706
BTSC_BT127_L_ACGATACCAAGCCGCT	-13.9937	11.3548	BT127_L	BT127	GSC	0.350013	0.218674	0.476718	0.560059	0.313768
BTSC_BT127_L_ACGATACCACCAGGCT	-12.5289	15.998	BT127_L	BT127	GSC	0.459278	0.262942	0.397563	0.581764	0.445036
BTSC_BT127_L_ACGATACTCCAGTAGT	-13.0892	6.95583	BT127_L	BT127	GSC	0.38524	0.26845	0.408865	0.53295	0.559522
BTSC_BT127_L_ACGATACTCCATGCTC	1.57143	8.49653	BT127_L	BT127	GSC	0.369095	0.346603	0.409812	0.268853	0.434036
BTSC_BT127_L_ACGCAGCTCGTTTAGG	-16.9589	-9.5021	BT127_L	BT127	GSC	0.307185	0.179784	0.396317	0.413573	0.156663
BTSC_BT127_L_ACGCCAGAGTATGACA	-16.441	5.23955	BT127_L	BT127	GSC	0.382213	0.146338	0.414168	0.419741	0.172709
BTSC_BT127_L_ACGCCAGCATGCCACG	-7.54215	8.03906	BT127_L	BT127	GSC	0.451987	0.184131	0.425758	0.380298	0.615553
BTSC_BT127_L_ACGGAGAAGAAGAAGC	6.12768	9.8744	BT127_L	BT127	GSC	0.334416	0.340103	0.515866	0.462531	0.508613
BTSC_BT127_L_ACGGAGAAGACCTAGG	-3.15086	29.2857	BT127_L	BT127	GSC	0.519369	0.153425	0.406316	0.389699	0.517356
BTSC_BT127_L_ACGGAGACAGGTCGTC	-5.52281	13.6152	BT127_L	BT127	GSC	0.338978	0.257394	0.502739	0.272512	0.520558
BTSC_BT127_L_ACGGAGACATCAGTAC	-19.199	6.36036	BT127_L	BT127	GSC	0.333092	0.241731	0.452058	0.485719	0.191503
BTSC_BT127_L_ACGGAGAGTCGAAAGC	-7.46902	14.7366	BT127_L	BT127	GSC	0.397789	0.220087	0.383022	0.389568	0.43551
BTSC_BT127_L_ACGGCCAAGAAAGTGG	-14.8242	6.63888	BT127_L	BT127	GSC	0.322205	0.209276	0.467142	0.5104	0.268964
BTSC_BT127_L_ACGGCCAAGGGAAACA	-9.21829	9.69217	BT127_L	BT127	GSC	0.353287	0.263313	0.387507	0.432303	0.348234
BTSC_BT127_L_ACGGCCAAGGTAGCCA	-1.76684	7.85124	BT127_L	BT127	GSC	0.349361	0.290845	0.569557	0.423798	0.355342
BTSC_BT127_L_ACGGCCACAAGGTTCT	-13.0985	5.49914	BT127_L	BT127	GSC	0.360237	0.25511	0.434104	0.375108	0.323456
BTSC_BT127_L_ACGGCCATCACGCGGT	-4.18088	13.9072	BT127_L	BT127	GSC	0.476022	0.212673	0.406802	0.390986	0.413672
BTSC_BT127_L_ACGGCCATCGTCTGCT	-12.8311	11.187	BT127_L	BT127	GSC	0.461499	0.214594	0.408703	0.447955	0.548008
BTSC_BT127_L_ACGGCCATCTGGAGCC	-17.5007	0.00483672	BT127_L	BT127	GSC	0.334551	0.178814	0.386496	0.396755	0.261578
BTSC_BT127_L_ACGGGCTCATGGTAGG	-16.2215	3.72109	BT127_L	BT127	GSC	0.374074	0.202989	0.510403	0.391353	0.400515
BTSC_BT127_L_ACGGGCTTCGCCTGTT	-18.9225	6.53538	BT127_L	BT127	GSC	0.359328	0.199676	0.40477	0.491536	0.236149
BTSC_BT127_L_ACGGGCTTCTAACTGG	-5.61707	9.61409	BT127_L	BT127	GSC	0.381953	0.313467	0.420252	0.445187	0.580249
BTSC_BT127_L_ACGGGTCAGTAAGTAC	-9.29762	12.9623	BT127_L	BT127	GSC	0.320861	0.28204	0.501756	0.481771	0.460098
BTSC_BT127_L_ACGGGTCAGTTAGCGG	-7.14338	14.0828	BT127_L	BT127	GSC	0.427757	0.195559	0.417247	0.406568	0.364861
BTSC_BT127_L_ACGGGTCCACAGCGTC	0.20848	9.04429	BT127_L	BT127	GSC	0.33591	0.289134	0.467282	0.298729	0.346678
BTSC_BT127_L_ACGTCAAAGTCCGGTC	-17.9118	1.97633	BT127_L	BT127	GSC	0.317213	0.209781	0.480511	0.562347	0.329472
BTSC_BT127_L_ACGTCAACACGGTAGA	-1.50883	8.67923	BT127_L	BT127	GSC	0.376666	0.282488	0.450209	0.459967	0.501307
BTSC_BT127_L_ACGTCAAGTAGTGAAT	-2.63054	11.5593	BT127_L	BT127	GSC	0.406851	0.249406	0.509699	0.39991	0.555107
BTSC_BT127_L_ACTATCTAGCAATCTC	-10.8891	17.9754	BT127_L	BT127	GSC	0.420598	0.210856	0.360976	0.411935	0.51056
BTSC_BT127_L_ACTATCTCATACGCCG	1.72305	6.51748	BT127_L	BT127	GSC	0.306553	0.402141	0.468817	0.492877	0.470326
BTSC_BT127_L_ACTATCTGTGAGTGAC	6.19244	15.8768	BT127_L	BT127	GSC	0.362691	0.294639	0.499507	0.322139	0.450279
BTSC_BT127_L_ACTGAACAGCCGCCTA	-6.55405	7.94796	BT127_L	BT127	GSC	0.325702	0.26239	0.485598	0.394931	0.431743
BTSC_BT127_L_ACTGAACAGTTACCCA	-12.3668	8.50085	BT127_L	BT127	GSC	0.373707	0.229956	0.489069	0.340248	0.268757
BTSC_BT127_L_ACTGAACCATACTACG	-1.90032	12.6714	BT127_L	BT127	GSC	0.407896	0.282208	0.328008	0.45986	0.45867
BTSC_BT127_L_ACTGAGTAGTACATGA	-4.922	12.5574	BT127_L	BT127	GSC	0.437653	0.227185	0.469344	0.496705	0.25896
BTSC_BT127_L_ACTGAGTGTTAAGGGC	-11.1667	12.26	BT127_L	BT127	GSC	0.479889	0.206844	0.406098	0.373624	0.461579
BTSC_BT127_L_ACTGATGGTACATCCA	-11.4058	9.05572	BT127_L	BT127	GSC	0.324461	0.202634	0.435929	0.467217	0.29847
BTSC_BT127_L_ACTGCTCCACATCTTT	-12.8152	0.321735	BT127_L	BT127	GSC	0.310833	0.228418	0.427255	0.378346	0.230201
BTSC_BT127_L_ACTGCTCCATGATCCA	-6.446	9.77591	BT127_L	BT127	GSC	0.342506	0.226122	0.384465	0.502451	0.342078
BTSC_BT127_L_ACTGCTCTCGTAGGTT	3.12961	14.3479	BT127_L	BT127	GSC	0.368438	0.292688	0.437251	0.321812	0.394106
BTSC_BT127_L_ACTGTCCAGGAGTCTG	-15.8626	-7.27337	BT127_L	BT127	GSC	0.31497	0.174322	0.410658	0.508424	0.204068
BTSC_BT127_L_ACTGTCCAGGGCACTA	-7.27148	11.7373	BT127_L	BT127	GSC	0.343207	0.250118	0.538643	0.458968	0.244059
BTSC_BT127_L_ACTGTCCCAATGCCAT	4.23159	7.69772	BT127_L	BT127	GSC	0.39109	0.310252	0.499513	0.40745	0.487649
BTSC_BT127_L_ACTGTCCCATACAGCT	-16.592	12.2243	BT127_L	BT127	GSC	0.393731	0.212871	0.366261	0.408283	0.37156
BTSC_BT127_L_ACTGTCCGTCTGCCAG	-8.06584	22.3956	BT127_L	BT127	GSC	0.4059	0.170731	0.352445	0.442496	0.498491
BTSC_BT127_L_ACTTACTAGACGCAAC	-13.5591	6.04021	BT127_L	BT127	GSC	0.337922	0.280407	0.529679	0.246912	0.395985
BTSC_BT127_L_ACTTACTAGAGACTAT	-14.0264	-2.77272	BT127_L	BT127	GSC	0.279877	0.178027	0.439936	0.492319	0.160235
BTSC_BT127_L_ACTTACTAGGTGCTAG	-12.7255	13.6309	BT127_L	BT127	GSC	0.362143	0.179397	0.345802	0.585529	0.211075
BTSC_BT127_L_ACTTACTTCAAACAAG	-6.42633	8.13431	BT127_L	BT127	GSC	0.299187	0.216339	0.400297	0.386067	0.288387
BTSC_BT127_L_ACTTGTTAGTCCAGGA	-6.64574	-3.31146	BT127_L	BT127	GSC	0.261643	0.171216	0.515272	0.489699	0.195824
BTSC_BT127_L_ACTTGTTGTACAGCAG	-12.1584	13.8799	BT127_L	BT127	GSC	0.376305	0.239958	0.509047	0.516361	0.456205
BTSC_BT127_L_ACTTGTTTCGGCATCG	-3.574	7.67444	BT127_L	BT127	GSC	0.351814	0.263647	0.399266	0.333791	0.394624
BTSC_BT127_L_ACTTTCATCTAACCGA	-6.8205	9.34804	BT127_L	BT127	GSC	0.396785	0.305941	0.468259	0.323662	0.354868
BTSC_BT127_L_AGAATAGCACCAGCAC	-12.9277	12.4158	BT127_L	BT127	GSC	0.458566	0.134639	0.352932	0.492493	0.334008
BTSC_BT127_L_AGAATAGCATCCCATC	1.88046	23.3422	BT127_L	BT127	GSC	0.445429	0.147724	0.32415	0.387211	0.367295
BTSC_BT127_L_AGAATAGCATCGATTG	-15.6632	-5.57028	BT127_L	BT127	GSC	0.289611	0.16252	0.498968	0.456174	0.259831
BTSC_BT127_L_AGAATAGCATGACGGA	-20.0881	2.61959	BT127_L	BT127	GSC	0.36307	0.221022	0.449802	0.444771	0.37224
BTSC_BT127_L_AGAATAGGTCCGTGAC	-3.36026	3.68107	BT127_L	BT127	GSC	0.282831	0.247903	0.51656	0.481852	0.3341
BTSC_BT127_L_AGAATAGGTCGCTTCT	-13.8686	-2.29194	BT127_L	BT127	GSC	0.326969	0.200365	0.52954	0.456353	0.19109
BTSC_BT127_L_AGAATAGGTCTAGAGG	-16.8707	-4.22406	BT127_L	BT127	GSC	0.31169	0.162184	0.406752	0.462279	0.269463
BTSC_BT127_L_AGAATAGGTTAAGAAC	-2.88016	10.1749	BT127_L	BT127	GSC	0.379578	0.273165	0.487571	0.425145	0.283766
BTSC_BT127_L_AGAATAGTCATTTGGG	-15.0214	9.62846	BT127_L	BT127	GSC	0.368638	0.255203	0.346762	0.404833	0.45744
BTSC_BT127_L_AGAATAGTCGTTTGCC	-3.82474	-0.43888	BT127_L	BT127	GSC	0.299097	0.268395	0.473821	0.379533	0.295773
BTSC_BT127_L_AGACGTTCATCGACGC	-18.8085	-9.73063	BT127_L	BT127	GSC	0.305905	0.230204	0.480265	0.41447	0.207063
BTSC_BT127_L_AGAGCGAAGCCACGCT	-15.0193	-2.04217	BT127_L	BT127	GSC	0.341572	0.189021	0.476675	0.351719	0.304719
BTSC_BT127_L_AGAGCGACATCCTAGA	-3.97753	8.11222	BT127_L	BT127	GSC	0.485801	0.342612	0.53974	0.27173	0.674948
BTSC_BT127_L_AGAGCTTCAAACGCGA	-14.4577	-10.582	BT127_L	BT127	GSC	0.278259	0.209133	0.451193	0.401919	0.164868
BTSC_BT127_L_AGAGCTTCACACAGAG	-13.0574	5.53258	BT127_L	BT127	GSC	0.28596	0.213609	0.521937	0.418641	0.313575
BTSC_BT127_L_AGAGCTTCAGTATAAG	-4.00408	4.50133	BT127_L	BT127	GSC	0.368432	0.274612	0.510509	0.408312	0.40794
BTSC_BT127_L_AGAGTGGAGAGGTAGA	-11.7757	9.23237	BT127_L	BT127	GSC	0.329583	0.269752	0.418154	0.552014	0.316837
BTSC_BT127_L_AGAGTGGAGATGTCGG	-8.45061	8.60474	BT127_L	BT127	GSC	0.432053	0.26239	0.4685	0.446382	0.494916
BTSC_BT127_L_AGAGTGGAGGAGTCTG	-12.0353	13.9892	BT127_L	BT127	GSC	0.460774	0.191725	0.39365	0.374562	0.210297
BTSC_BT127_L_AGAGTGGCACGCATCG	-8.42788	15.3215	BT127_L	BT127	GSC	0.576942	0.287372	0.338375	0.371601	0.437817
BTSC_BT127_L_AGATCTGCAGCTGTGC	-15.6689	5.17249	BT127_L	BT127	GSC	0.336177	0.204498	0.38692	0.438937	0.373297
BTSC_BT127_L_AGATCTGCATTGAGCT	-9.58757	6.61975	BT127_L	BT127	GSC	0.26356	0.300911	0.484227	0.492808	0.299426
BTSC_BT127_L_AGATCTGTCTACTTAC	-7.77421	11.0574	BT127_L	BT127	GSC	0.347236	0.22055	0.496421	0.405577	0.329765
BTSC_BT127_L_AGATTGCAGCCCAATT	-17.7331	3.52711	BT127_L	BT127	GSC	0.306915	0.27536	0.503708	0.427315	0.305141
BTSC_BT127_L_AGATTGCAGCGCTCCA	-6.78901	5.24743	BT127_L	BT127	GSC	0.387142	0.201947	0.436544	0.405741	0.269688
BTSC_BT127_L_AGATTGCCAAACAACA	-0.215095	15.0408	BT127_L	BT127	GSC	0.43104	0.364046	0.369364	0.431703	0.703344
BTSC_BT127_L_AGATTGCGTTACGTCA	-3.68237	17.0957	BT127_L	BT127	GSC	0.321064	0.219042	0.459929	0.44391	0.497428
BTSC_BT127_L_AGATTGCTCACTCTTA	-3.13385	16.4838	BT127_L	BT127	GSC	0.453697	0.287682	0.455749	0.426461	0.516681
BTSC_BT127_L_AGCAGCCAGCCCAATT	-12.6545	-1.95947	BT127_L	BT127	GSC	0.317518	0.2072	0.457166	0.352309	0.285759
BTSC_BT127_L_AGCAGCCAGGAGCGAG	-19.2995	-9.33478	BT127_L	BT127	GSC	0.300416	0.201013	0.403397	0.363336	0.224887
BTSC_BT127_L_AGCAGCCCATACTCTT	-4.37417	6.50398	BT127_L	BT127	GSC	0.371267	0.296956	0.472984	0.338826	0.475239
BTSC_BT127_L_AGCATACAGGGCACTA	-2.86774	10.1417	BT127_L	BT127	GSC	0.358584	0.162665	0.386551	0.390396	0.566635
BTSC_BT127_L_AGCATACAGTTTAGGA	-11.1938	16.7574	BT127_L	BT127	GSC	0.378018	0.242595	0.504	0.491826	0.403184
BTSC_BT127_L_AGCATACCAAAGCGGT	-15.5868	1.22073	BT127_L	BT127	GSC	0.300286	0.283859	0.493976	0.481629	0.40572
BTSC_BT127_L_AGCATACGTACGCTGC	-14.2238	11.0829	BT127_L	BT127	GSC	0.560044	0.28102	0.255525	0.50213	0.672053
BTSC_BT127_L_AGCATACTCACTGGGC	-12.6691	11.2917	BT127_L	BT127	GSC	0.347832	0.270731	0.56595	0.480576	0.360814
BTSC_BT127_L_AGCCTAAAGGCCCGTT	-5.62676	10.2202	BT127_L	BT127	GSC	0.380403	0.35149	0.434594	0.400271	0.591559
BTSC_BT127_L_AGCCTAAGTACGAAAT	-7.8401	15.2365	BT127_L	BT127	GSC	0.349512	0.202659	0.491256	0.436628	0.449643
BTSC_BT127_L_AGCCTAAGTCGCATAT	-4.21027	8.61542	BT127_L	BT127	GSC	0.374624	0.374591	0.613223	0.220788	0.619365
BTSC_BT127_L_AGCCTAATCCGAAGAG	-8.89744	-4.04069	BT127_L	BT127	GSC	0.396658	0.496663	0.511953	0.358224	0.472542
BTSC_BT127_L_AGCCTAATCTGCAAGT	-6.7212	10.8723	BT127_L	BT127	GSC	0.401772	0.228002	0.390538	0.446953	0.44993
BTSC_BT127_L_AGCGGTCAGAAGATTC	-13.986	10.9161	BT127_L	BT127	GSC	0.371875	0.240915	0.542603	0.374712	0.186526
BTSC_BT127_L_AGCGGTCTCCACTGGG	7.05802	19.447	BT127_L	BT127	GSC	0.442558	0.188028	0.407049	0.342012	0.401496
BTSC_BT127_L_AGCGTATAGCGAGAAA	-2.32559	12.1522	BT127_L	BT127	GSC	0.35124	0.290265	0.41495	0.549512	0.376702
BTSC_BT127_L_AGCGTATAGCTGCAAG	-15.2905	11.8496	BT127_L	BT127	GSC	0.318807	0.254195	0.385597	0.475683	0.333542
BTSC_BT127_L_AGCGTATGTGATAAGT	-6.0438	9.16689	BT127_L	BT127	GSC	0.496237	0.270176	0.398564	0.490014	0.511798
BTSC_BT127_L_AGCGTATTCAGCAACT	-12.4066	-5.81392	BT127_L	BT127	GSC	0.304801	0.232061	0.463415	0.418922	0.28457
BTSC_BT127_L_AGCGTCGCATAAAGGT	-1.13566	10.357	BT127_L	BT127	GSC	0.373038	0.231756	0.416515	0.642486	0.30768
BTSC_BT127_L_AGCGTCGTCCTAGTGA	-8.16946	13.1859	BT127_L	BT127	GSC	0.364801	0.20677	0.47118	0.555726	0.35688
BTSC_BT127_L_AGCGTCGTCGGAGGTA	-13.2815	1.03538	BT127_L	BT127	GSC	0.304563	0.270299	0.421565	0.487576	0.292546
BTSC_BT127_L_AGCTCCTTCAATACCG	-4.45763	12.6413	BT127_L	BT127	GSC	0.421086	0.197328	0.408696	0.317851	0.35943
BTSC_BT127_L_AGCTCCTTCATGCTCC	-8.90938	10.5753	BT127_L	BT127	GSC	0.406128	0.313261	0.437561	0.422789	0.417002
BTSC_BT127_L_AGCTCCTTCGTCACGG	-13.3861	7.5787	BT127_L	BT127	GSC	0.364551	0.20578	0.430523	0.521244	0.225399
BTSC_BT127_L_AGCTCTCGTGCGATAG	-19.0636	-7.55279	BT127_L	BT127	GSC	0.2908	0.193842	0.467381	0.360722	0.262273
BTSC_BT127_L_AGCTCTCGTGGTCTCG	2.73309	10.4157	BT127_L	BT127	GSC	0.467374	0.351951	0.362318	0.369524	0.548806
BTSC_BT127_L_AGCTCTCTCTAAGCCA	-11.0722	10.8487	BT127_L	BT127	GSC	0.419781	0.22886	0.342474	0.600532	0.494178
BTSC_BT127_L_AGCTTGAAGATGTAAC	-7.80573	11.4563	BT127_L	BT127	GSC	0.309844	0.242567	0.496575	0.495001	0.344409
BTSC_BT127_L_AGCTTGAGTTCCCTTG	-11.5327	17.6754	BT127_L	BT127	GSC	0.356365	0.184502	0.421931	0.449469	0.375125
BTSC_BT127_L_AGGCCACCAGCGAACA	-2.79043	24.5053	BT127_L	BT127	GSC	0.40205	0.235199	0.421683	0.470521	0.461297
BTSC_BT127_L_AGGCCACGTGGAAAGA	-16.9336	14.9663	BT127_L	BT127	GSC	0.316101	0.214065	0.375405	0.493788	0.279495
BTSC_BT127_L_AGGCCACTCACCTTAT	-12.2724	10.9721	BT127_L	BT127	GSC	0.352224	0.190965	0.383664	0.463748	0.267518
BTSC_BT127_L_AGGCCGTCATAGGATA	-12.2513	0.206492	BT127_L	BT127	GSC	0.303826	0.244159	0.486702	0.560203	0.372698
BTSC_BT127_L_AGGCCGTCATCGATGT	-8.66294	13.6274	BT127_L	BT127	GSC	0.337371	0.252795	0.593689	0.35491	0.374026
BTSC_BT127_L_AGGGAGTAGTGGTAGC	-10.9033	-3.46285	BT127_L	BT127	GSC	0.299974	0.18981	0.459892	0.374302	0.261203
BTSC_BT127_L_AGGGATGCAAATCCGT	-9.69861	7.75398	BT127_L	BT127	GSC	0.337807	0.284915	0.450382	0.431081	0.432768
BTSC_BT127_L_AGGGTGAAGACGACGT	-3.68391	9.25026	BT127_L	BT127	GSC	0.38241	0.308354	0.438854	0.437675	0.538738
BTSC_BT127_L_AGGGTGAAGGCATGTG	-10.2676	16.3738	BT127_L	BT127	GSC	0.509392	0.256877	0.35629	0.458783	0.670296
BTSC_BT127_L_AGGGTGACACATAACC	-18.3438	-9.05912	BT127_L	BT127	GSC	0.354166	0.16901	0.408325	0.347669	0.168249
BTSC_BT127_L_AGGGTGACACCAGTTA	-13.6859	7.42993	BT127_L	BT127	GSC	0.425472	0.283898	0.457287	0.467239	0.582534
BTSC_BT127_L_AGGTCATCAATGCCAT	-16.1306	7.35437	BT127_L	BT127	GSC	0.342018	0.205734	0.417443	0.375344	0.43422
BTSC_BT127_L_AGGTCATGTCGCTTTC	-10.0651	13.8479	BT127_L	BT127	GSC	0.584119	0.227125	0.409671	0.33978	0.560665
BTSC_BT127_L_AGGTCCGAGAAGGACA	-15.1734	0.277089	BT127_L	BT127	GSC	0.33448	0.174066	0.413164	0.46414	0.304913
BTSC_BT127_L_AGGTCCGAGTTGAGAT	-0.395889	17.6682	BT127_L	BT127	GSC	0.315357	0.314887	0.424879	0.565915	0.282123
BTSC_BT127_L_AGGTCCGCAAGTTGTC	-7.97461	13.3331	BT127_L	BT127	GSC	0.460162	0.152082	0.476693	0.524874	0.543067
BTSC_BT127_L_AGGTCCGCACGTCAGC	-16.6038	-10.5547	BT127_L	BT127	GSC	0.285924	0.185393	0.459377	0.433458	0.147093
BTSC_BT127_L_AGGTCCGGTGTGGCTC	-19.9756	-6.35413	BT127_L	BT127	GSC	0.337805	0.182906	0.396874	0.414635	0.246142
BTSC_BT127_L_AGGTCCGGTTAAGAAC	-0.00891837	20.2688	BT127_L	BT127	GSC	0.432998	0.246414	0.410406	0.392373	0.434808
BTSC_BT127_L_AGGTCCGTCAATACCG	-12.1835	-2.38159	BT127_L	BT127	GSC	0.273458	0.178241	0.450893	0.373775	0.211611
BTSC_BT127_L_AGGTCCGTCAGAGCTT	-4.20074	11.0116	BT127_L	BT127	GSC	0.355096	0.201627	0.451631	0.468231	0.297011
BTSC_BT127_L_AGGTCCGTCTCGGACG	-10.1354	-0.434999	BT127_L	BT127	GSC	0.361375	0.413569	0.517418	0.19595	0.468044
BTSC_BT127_L_AGTAGTCAGATTACCC	-11.522	11.2343	BT127_L	BT127	GSC	0.346725	0.207797	0.435445	0.497141	0.354741
BTSC_BT127_L_AGTCTTTCAAGTACCT	-18.146	-1.92497	BT127_L	BT127	GSC	0.324093	0.173966	0.450637	0.389131	0.276626
BTSC_BT127_L_AGTCTTTCATGCTAGT	-6.84968	11.6463	BT127_L	BT127	GSC	0.437549	0.186968	0.399998	0.560805	0.245462
BTSC_BT127_L_AGTCTTTGTCCGTTAA	-17.4794	5.17673	BT127_L	BT127	GSC	0.324308	0.238289	0.546829	0.325183	0.327832
BTSC_BT127_L_AGTCTTTTCATGTGGT	-3.41008	6.0354	BT127_L	BT127	GSC	0.337474	0.324979	0.424645	0.510566	0.231317
BTSC_BT127_L_AGTCTTTTCGAGAACG	-6.95547	-9.37709	BT127_L	BT127	GSC	0.251092	0.171067	0.497032	0.375324	0.199767
BTSC_BT127_L_AGTGAGGAGCTGCAAG	-0.222436	14.6091	BT127_L	BT127	GSC	0.394452	0.23867	0.442535	0.468989	0.402192
BTSC_BT127_L_AGTGAGGCAATGAAAC	-6.14768	6.54159	BT127_L	BT127	GSC	0.396703	0.349502	0.437979	0.563476	0.492331
BTSC_BT127_L_AGTGAGGCAGCTGTAT	-12.776	12.8901	BT127_L	BT127	GSC	0.327452	0.251308	0.474039	0.443773	0.276902
BTSC_BT127_L_AGTGAGGGTCGAGTTT	-5.77214	1.82313	BT127_L	BT127	GSC	0.421174	0.414584	0.555136	0.399726	0.372229
BTSC_BT127_L_AGTGAGGGTTAAGACA	-13.9931	11.4054	BT127_L	BT127	GSC	0.421519	0.239391	0.440049	0.364405	0.451941
BTSC_BT127_L_AGTGGGATCAAGCCTA	-8.14667	9.02847	BT127_L	BT127	GSC	0.385233	0.25322	0.359517	0.310647	0.331781
BTSC_BT127_L_AGTGTCAAGAGGGCTT	-19.1498	-3.91275	BT127_L	BT127	GSC	0.300128	0.228217	0.469372	0.339779	0.218304
BTSC_BT127_L_AGTGTCACAGTCAGAG	-14.1082	6.39453	BT127_L	BT127	GSC	0.316849	0.194733	0.375775	0.553408	0.310869
BTSC_BT127_L_AGTGTCAGTACTTCTT	-0.375645	14.601	BT127_L	BT127	GSC	0.462854	0.237439	0.371285	0.432365	0.499405
BTSC_BT127_L_AGTTGGTAGCCGCCTA	-12.4559	13.0336	BT127_L	BT127	GSC	0.394124	0.207054	0.484648	0.350019	0.325296
BTSC_BT127_L_AGTTGGTAGGCGATAC	-15.7109	-3.77956	BT127_L	BT127	GSC	0.330535	0.190752	0.447839	0.396563	0.242306
BTSC_BT127_L_AGTTGGTTCCTTTCTC	-4.37718	14.2872	BT127_L	BT127	GSC	0.490392	0.28892	0.495115	0.342609	0.555028
BTSC_BT127_L_AGTTGGTTCGCGTAGC	-10.5324	4.93161	BT127_L	BT127	GSC	0.306249	0.201677	0.459542	0.41942	0.211064
BTSC_BT127_L_ATAACGCAGGCTACGA	-1.55067	13.4318	BT127_L	BT127	GSC	0.472155	0.258261	0.384591	0.332876	0.530867
BTSC_BT127_L_ATAACGCAGTAGTGCG	-10.6793	5.31019	BT127_L	BT127	GSC	0.34911	0.278733	0.479078	0.396597	0.314929
BTSC_BT127_L_ATAACGCCAAATACAG	-11.3932	2.63885	BT127_L	BT127	GSC	0.300303	0.226362	0.506391	0.47168	0.228584
BTSC_BT127_L_ATAACGCGTACAAGTA	-3.54791	10.3072	BT127_L	BT127	GSC	0.397246	0.33607	0.472079	0.363767	0.599586
BTSC_BT127_L_ATAACGCTCTTGAGGT	-3.90994	8.27521	BT127_L	BT127	GSC	0.359287	0.338041	0.514955	0.512018	0.442997
BTSC_BT127_L_ATAAGAGCACGTCTCT	-12.768	12.7976	BT127_L	BT127	GSC	0.420565	0.177355	0.450163	0.52652	0.496682
BTSC_BT127_L_ATAAGAGGTCACCTAA	-4.92719	6.53044	BT127_L	BT127	GSC	0.343115	0.433677	0.592501	0.413243	0.494876
BTSC_BT127_L_ATAAGAGTCTGGTATG	-17.5439	3.18503	BT127_L	BT127	GSC	0.373128	0.222203	0.408996	0.334858	0.294791
BTSC_BT127_L_ATAGACCAGAAACCGC	-9.87773	6.93569	BT127_L	BT127	GSC	0.519377	0.281509	0.469762	0.152669	0.665993
BTSC_BT127_L_ATAGACCAGCAAATCA	-11.2389	13.1615	BT127_L	BT127	GSC	0.365456	0.281874	0.450017	0.329406	0.41773
BTSC_BT127_L_ATAGACCCATTTCAGG	-13.9005	18.5333	BT127_L	BT127	GSC	0.450165	0.241169	0.315476	0.610524	0.445103
BTSC_BT127_L_ATAGACCGTGAGCGAT	2.41141	18.7404	BT127_L	BT127	GSC	0.395703	0.264752	0.425171	0.537296	0.554067
BTSC_BT127_L_ATAGACCTCCAAACAC	-13.0343	-1.24915	BT127_L	BT127	GSC	0.299166	0.18698	0.390688	0.346652	0.43946
BTSC_BT127_L_ATCACGAAGACACTAA	-14.8353	3.11262	BT127_L	BT127	GSC	0.303782	0.254656	0.546245	0.381134	0.371279
BTSC_BT127_L_ATCACGACACACCGAC	-12.8783	5.21632	BT127_L	BT127	GSC	0.331639	0.207125	0.457104	0.291962	0.271028
BTSC_BT127_L_ATCACGATCGGAAACG	-1.67428	18.1192	BT127_L	BT127	GSC	0.367557	0.329745	0.479789	0.510079	0.437954
BTSC_BT127_L_ATCACGATCTACCTGC	-5.38929	15.4573	BT127_L	BT127	GSC	0.423091	0.246655	0.448775	0.419907	0.411906
BTSC_BT127_L_ATCATCTAGCTATGCT	-17.3604	-9.93166	BT127_L	BT127	GSC	0.313046	0.18464	0.444056	0.495134	0.204043
BTSC_BT127_L_ATCATGGAGTCTCGGC	-13.3206	5.99742	BT127_L	BT127	GSC	0.350339	0.171312	0.412254	0.407722	0.271392
BTSC_BT127_L_ATCATGGCATCTCCCA	-11.3482	7.74592	BT127_L	BT127	GSC	0.413585	0.227048	0.438611	0.444507	0.340067
BTSC_BT127_L_ATCATGGGTGGCAAAC	-12.808	-2.32385	BT127_L	BT127	GSC	0.314868	0.18098	0.464216	0.416302	0.186945
BTSC_BT127_L_ATCATGGTCAGCGATT	-6.10591	6.96002	BT127_L	BT127	GSC	0.379624	0.16283	0.444928	0.435465	0.221467
BTSC_BT127_L_ATCATGGTCCCTCAGT	-12.9315	8.55255	BT127_L	BT127	GSC	0.331239	0.247955	0.461217	0.469186	0.3246
BTSC_BT127_L_ATCATGGTCGTCCAGG	-8.48726	6.62855	BT127_L	BT127	GSC	0.321483	0.20721	0.444762	0.376268	0.356217
BTSC_BT127_L_ATCCACCAGAGTAATC	-14.9741	-5.02233	BT127_L	BT127	GSC	0.305791	0.184882	0.426358	0.421695	0.317711
BTSC_BT127_L_ATCCACCAGCGTCTAT	-17.1002	3.29453	BT127_L	BT127	GSC	0.375171	0.28485	0.43117	0.280089	0.354167
BTSC_BT127_L_ATCCACCAGGAGTTGC	6.64817	12.7882	BT127_L	BT127	GSC	0.357232	0.329101	0.469448	0.365562	0.409954
BTSC_BT127_L_ATCCACCGTCCCTACT	-12.823	7.16718	BT127_L	BT127	GSC	0.441606	0.275207	0.424165	0.351643	0.585088
BTSC_BT127_L_ATCCACCGTTCCGGCA	-15.3903	8.53126	BT127_L	BT127	GSC	0.366174	0.179103	0.405736	0.415497	0.316043
BTSC_BT127_L_ATCCACCTCAATCTCT	-15.5651	7.27645	BT127_L	BT127	GSC	0.319669	0.207503	0.359134	0.457657	0.365714
BTSC_BT127_L_ATCCGAAGTAAGTGGC	-7.18172	10.0588	BT127_L	BT127	GSC	0.380433	0.222467	0.356361	0.294845	0.486028
BTSC_BT127_L_ATCCGAAGTAGGGACT	-11.697	10.4243	BT127_L	BT127	GSC	0.530268	0.305954	0.197502	0.403966	0.629186
BTSC_BT127_L_ATCCGAAGTCATCCCT	-14.9183	-3.56079	BT127_L	BT127	GSC	0.297817	0.227124	0.486891	0.382126	0.279699
BTSC_BT127_L_ATCCGAAGTCTAGCCG	-5.65096	7.30241	BT127_L	BT127	GSC	0.433562	0.33373	0.47526	0.421133	0.660853
BTSC_BT127_L_ATCCGAAGTGTGACCC	-10.3362	7.79957	BT127_L	BT127	GSC	0.457842	0.26118	0.405034	0.52891	0.305892
BTSC_BT127_L_ATCGAGTCAATACGCT	-6.20933	2.25255	BT127_L	BT127	GSC	0.299318	0.176519	0.487983	0.48441	0.326881
BTSC_BT127_L_ATCGAGTGTAAGTGGC	-15.3204	7.37878	BT127_L	BT127	GSC	0.343169	0.195057	0.374383	0.475183	0.333803
BTSC_BT127_L_ATCGAGTGTACGCACC	-4.19895	8.80436	BT127_L	BT127	GSC	0.403128	0.297808	0.451046	0.372712	0.356781
BTSC_BT127_L_ATCGAGTGTAGGACAC	-8.56884	12.7279	BT127_L	BT127	GSC	0.510014	0.253805	0.306655	0.394527	0.779298
BTSC_BT127_L_ATCTACTAGAAACGCC	-13.1774	9.07859	BT127_L	BT127	GSC	0.453927	0.224204	0.348501	0.364657	0.281559
BTSC_BT127_L_ATCTACTAGACCCACC	-17.6736	3.2534	BT127_L	BT127	GSC	0.350123	0.173004	0.421656	0.389643	0.289626
BTSC_BT127_L_ATCTACTCATTTCAGG	-11.1258	13.9246	BT127_L	BT127	GSC	0.368239	0.166306	0.33733	0.50132	0.266639
BTSC_BT127_L_ATCTACTTCCACTGGG	-18.3	-3.43645	BT127_L	BT127	GSC	0.329762	0.242918	0.420284	0.424557	0.284185
BTSC_BT127_L_ATCTGCCCACCACCAG	-11.3717	12.0402	BT127_L	BT127	GSC	0.382961	0.208938	0.379468	0.418846	0.599169
BTSC_BT127_L_ATCTGCCCAGCTGCTG	-6.70871	7.09334	BT127_L	BT127	GSC	0.396816	0.372707	0.432548	0.277721	0.493801
BTSC_BT127_L_ATCTGCCCATGCAATC	1.28485	15.8922	BT127_L	BT127	GSC	0.49119	0.20511	0.311201	0.454167	0.618627
BTSC_BT127_L_ATCTGCCGTCTTCTCG	-17.4259	18.4234	BT127_L	BT127	GSC	0.333838	0.208256	0.330095	0.572206	0.509775
BTSC_BT127_L_ATCTGCCGTTCCGTCT	-13.2478	2.72809	BT127_L	BT127	GSC	0.46284	0.352763	0.463002	0.271543	0.478546
BTSC_BT127_L_ATGAGGGAGGATTCGG	-5.17122	15.7163	BT127_L	BT127	GSC	0.453776	0.153798	0.41659	0.519285	0.49458
BTSC_BT127_L_ATGAGGGCATGTAAGA	-9.01555	13.4003	BT127_L	BT127	GSC	0.551699	0.186131	0.275016	0.32356	0.479728
BTSC_BT127_L_ATGAGGGTCCTCATTA	-10.7263	8.99229	BT127_L	BT127	GSC	0.322212	0.28926	0.4375	0.307442	0.526182
BTSC_BT127_L_ATGCGATAGGATGTAT	-2.7311	11.4817	BT127_L	BT127	GSC	0.377031	0.269781	0.33783	0.3585	0.367334
BTSC_BT127_L_ATGCGATCACAGCCCA	3.79667	11.2406	BT127_L	BT127	GSC	0.414327	0.28644	0.403983	0.27319	0.489026
BTSC_BT127_L_ATGCGATTCACCTCGT	-2.66802	17.5116	BT127_L	BT127	GSC	0.487946	0.216245	0.413342	0.37593	0.545479
BTSC_BT127_L_ATGGGAGCAGGGAGAG	-12.932	-11.389	BT127_L	BT127	GSC	0.278409	0.216016	0.439087	0.38139	0.257253
BTSC_BT127_L_ATGTGTGAGACACGAC	-2.46757	18.7968	BT127_L	BT127	GSC	0.467382	0.211882	0.497943	0.465532	0.558674
BTSC_BT127_L_ATGTGTGCAACACCCG	2.12742	19.5546	BT127_L	BT127	GSC	0.506303	0.247944	0.342323	0.405171	0.603397
BTSC_BT127_L_ATGTGTGCAGTTCCCT	-14.5223	6.60144	BT127_L	BT127	GSC	0.332343	0.209426	0.449883	0.497055	0.404003
BTSC_BT127_L_ATTACTCAGCCTATGT	-4.13163	13.5309	BT127_L	BT127	GSC	0.406675	0.238718	0.394564	0.302383	0.637394
BTSC_BT127_L_ATTACTCGTTGCGCAC	-14.4308	-0.4652	BT127_L	BT127	GSC	0.329896	0.253469	0.459342	0.369253	0.326189
BTSC_BT127_L_ATTACTCTCCAGAGGA	2.16169	15.1086	BT127_L	BT127	GSC	0.357942	0.281244	0.387965	0.511839	0.436994
BTSC_BT127_L_ATTATCCAGCCCAATT	-1.85494	10.9704	BT127_L	BT127	GSC	0.382494	0.265783	0.454903	0.403881	0.539768
BTSC_BT127_L_ATTATCCCAGCATGAG	-13.1553	-5.90856	BT127_L	BT127	GSC	0.308488	0.164981	0.40025	0.505933	0.363579
BTSC_BT127_L_ATTATCCGTAGGCTGA	-6.86385	8.85929	BT127_L	BT127	GSC	0.451001	0.300932	0.520597	0.405042	0.368808
BTSC_BT127_L_ATTATCCGTCCCGACA	-6.13036	10.4664	BT127_L	BT127	GSC	0.430381	0.336305	0.40489	0.393297	0.512662
BTSC_BT127_L_ATTATCCTCTCGGACG	3.51688	18.6236	BT127_L	BT127	GSC	0.441469	0.232108	0.377721	0.44294	0.503478
BTSC_BT127_L_ATTCTACTCAAGGCTT	-19.7911	14.918	BT127_L	BT127	GSC	0.337775	0.195686	0.355762	0.466852	0.177795
BTSC_BT127_L_ATTCTACTCGCCATAA	-5.04354	16.5374	BT127_L	BT127	GSC	0.296731	0.226175	0.372977	0.354817	0.312256
BTSC_BT127_L_ATTCTACTCGTCTGCT	-5.68209	9.82698	BT127_L	BT127	GSC	0.41158	0.337401	0.387169	0.506101	0.345917
BTSC_BT127_L_ATTGGACCAGGACCCT	2.06714	12.7216	BT127_L	BT127	GSC	0.407047	0.259591	0.509463	0.390997	0.314439
BTSC_BT127_L_ATTGGACCATATACGC	-9.17169	5.36793	BT127_L	BT127	GSC	0.39874	0.392166	0.439286	0.384833	0.411727
BTSC_BT127_L_ATTGGACTCGTCCAGG	-23.0661	4.19488	BT127_L	BT127	GSC	0.403651	0.249338	0.378481	0.385916	0.487656
BTSC_BT127_L_ATTGGTGAGGCGACAT	-6.72385	17.4514	BT127_L	BT127	GSC	0.336789	0.223488	0.383667	0.468291	0.461559
BTSC_BT127_L_ATTTCTGAGCACGCCT	-15.3613	3.87852	BT127_L	BT127	GSC	0.32442	0.181996	0.410567	0.447619	0.141459
BTSC_BT127_L_ATTTCTGGTCACAAGG	-12.1369	-2.82494	BT127_L	BT127	GSC	0.306094	0.254526	0.574171	0.375421	0.240179
BTSC_BT127_L_ATTTCTGTCAAGGTAA	-15.9219	4.90782	BT127_L	BT127	GSC	0.328826	0.225893	0.396745	0.43328	0.352849
BTSC_BT127_L_CAACCAAAGACGACGT	-7.26627	15.4746	BT127_L	BT127	GSC	0.401412	0.308992	0.434545	0.411171	0.444977
BTSC_BT127_L_CAACCAACACGTTGGC	-0.798931	8.32609	BT127_L	BT127	GSC	0.358409	0.324532	0.56403	0.348993	0.515682
BTSC_BT127_L_CAACCTCAGCGCTTAT	-17.0641	-1.95899	BT127_L	BT127	GSC	0.509416	0.38574	0.437994	0.35297	0.652083
BTSC_BT127_L_CAACCTCGTGCGGTAA	-19.3833	-10.3016	BT127_L	BT127	GSC	0.301492	0.182464	0.40908	0.516442	0.279665
BTSC_BT127_L_CAACTAGCAATGGAAT	-20.893	-11.4584	BT127_L	BT127	GSC	0.291112	0.19386	0.407782	0.423713	0.278325
BTSC_BT127_L_CAACTAGGTACGAAAT	-3.86587	8.3681	BT127_L	BT127	GSC	0.357759	0.247204	0.458101	0.410875	0.306549
BTSC_BT127_L_CAAGAAAAGCTCTCGG	-9.04801	7.80251	BT127_L	BT127	GSC	0.557443	0.271937	0.461529	0.29765	0.451544
BTSC_BT127_L_CAAGAAACAATCGGTT	1.49404	19.3824	BT127_L	BT127	GSC	0.472153	0.214098	0.342118	0.493512	0.61264
BTSC_BT127_L_CAAGAAAGTAGTACCT	-13.2335	9.59427	BT127_L	BT127	GSC	0.357572	0.191741	0.446108	0.372105	0.175739
BTSC_BT127_L_CAAGATCCAATAACGA	-5.58572	19.3115	BT127_L	BT127	GSC	0.374423	0.215552	0.378439	0.428415	0.400138
BTSC_BT127_L_CAAGATCGTGATGCCC	-5.31473	10.558	BT127_L	BT127	GSC	0.398433	0.286052	0.496796	0.329677	0.444782
BTSC_BT127_L_CAAGATCTCTAGAGTC	-11.5202	2.79877	BT127_L	BT127	GSC	0.286975	0.234608	0.455454	0.422595	0.270827
BTSC_BT127_L_CAAGGCCCAACAACCT	-7.43477	19.3548	BT127_L	BT127	GSC	0.401445	0.186453	0.332416	0.510149	0.234752
BTSC_BT127_L_CAAGGCCCAGGTCGTC	-14.1278	9.65768	BT127_L	BT127	GSC	0.530726	0.271267	0.332679	0.348011	0.587243
BTSC_BT127_L_CAAGGCCGTATCAGTC	-10.7856	-0.234197	BT127_L	BT127	GSC	0.427182	0.406503	0.53082	0.29571	0.489659
BTSC_BT127_L_CAAGGCCGTCGACTGC	-2.65965	7.95441	BT127_L	BT127	GSC	0.364321	0.382632	0.48018	0.406387	0.505046
BTSC_BT127_L_CAAGGCCGTCGGATCC	-8.70445	11.6	BT127_L	BT127	GSC	0.511312	0.266255	0.375236	0.346546	0.620883
BTSC_BT127_L_CAAGGCCTCTACCAGA	-13.2496	5.402	BT127_L	BT127	GSC	0.349486	0.194999	0.414607	0.429589	0.299732
BTSC_BT127_L_CAAGTTGAGTCTCGGC	-10.8913	15.6495	BT127_L	BT127	GSC	0.466826	0.156587	0.391819	0.546619	0.450667
BTSC_BT127_L_CACAAACAGAGTGAGA	-16.4277	11.6932	BT127_L	BT127	GSC	0.36586	0.160497	0.394397	0.627639	0.236235
BTSC_BT127_L_CACAAACAGGCGATAC	-17.937	12.5788	BT127_L	BT127	GSC	0.362118	0.21688	0.403361	0.412945	0.51092
BTSC_BT127_L_CACAAACGTAGCGCTC	-0.918971	12.0731	BT127_L	BT127	GSC	0.382231	0.285283	0.516105	0.50666	0.322679
BTSC_BT127_L_CACAAACGTAGCTCCG	-7.51604	8.19395	BT127_L	BT127	GSC	0.337652	0.230127	0.546524	0.346902	0.212255
BTSC_BT127_L_CACAAACTCAGGCGAA	-13.6098	-1.38249	BT127_L	BT127	GSC	0.315603	0.184041	0.407841	0.455648	0.295121
BTSC_BT127_L_CACAAACTCGTCTGAA	-0.584508	14.9681	BT127_L	BT127	GSC	0.387846	0.347769	0.454272	0.460035	0.504901
BTSC_BT127_L_CACACAAAGATAGTCA	-8.50189	8.95713	BT127_L	BT127	GSC	0.349596	0.191239	0.42753	0.460055	0.395618
BTSC_BT127_L_CACACAAAGGAGCGTT	1.7158	19.7197	BT127_L	BT127	GSC	0.414549	0.236571	0.424274	0.577022	0.540054
BTSC_BT127_L_CACACAAAGGTGCACA	-9.04465	13.055	BT127_L	BT127	GSC	0.520717	0.240157	0.428283	0.230161	0.570296
BTSC_BT127_L_CACACCTAGGCTCATT	-15.3182	7.4364	BT127_L	BT127	GSC	0.413383	0.27267	0.465018	0.375181	0.410351
BTSC_BT127_L_CACACCTCAAGTCTAC	-7.0143	11.9737	BT127_L	BT127	GSC	0.401795	0.226482	0.405157	0.516772	0.569757
BTSC_BT127_L_CACACCTGTAATCACC	-3.50859	12.9432	BT127_L	BT127	GSC	0.338498	0.224018	0.410516	0.394856	0.418179
BTSC_BT127_L_CACACCTGTAGGGACT	-0.376884	9.92111	BT127_L	BT127	GSC	0.383495	0.20155	0.440783	0.336056	0.473277
BTSC_BT127_L_CACACCTGTTTGCATG	-14.0902	12.8021	BT127_L	BT127	GSC	0.423194	0.146523	0.329072	0.32284	0.365692
BTSC_BT127_L_CACACCTTCAGAGGTG	-12.9046	13.9508	BT127_L	BT127	GSC	0.391861	0.225658	0.349347	0.471226	0.421709
BTSC_BT127_L_CACACCTTCGATAGAA	-3.82682	21.9234	BT127_L	BT127	GSC	0.448641	0.211855	0.450639	0.383981	0.470713
BTSC_BT127_L_CACACTCCATCGATTG	-10.9841	12.3518	BT127_L	BT127	GSC	0.366987	0.282778	0.385918	0.507304	0.500565
BTSC_BT127_L_CACACTCGTAGCGTGA	-14.8125	8.28444	BT127_L	BT127	GSC	0.356064	0.212706	0.396092	0.374332	0.413014
BTSC_BT127_L_CACAGGCAGACTTTCG	-16.8752	-11.0911	BT127_L	BT127	GSC	0.304969	0.198338	0.480993	0.36721	0.304481
BTSC_BT127_L_CACAGGCAGATGGGTC	-11.2759	6.1843	BT127_L	BT127	GSC	0.327805	0.256588	0.46414	0.412086	0.327905
BTSC_BT127_L_CACAGGCCACTAGTAC	-11.7748	12.6006	BT127_L	BT127	GSC	0.512092	0.272392	0.460674	0.395841	0.534908
BTSC_BT127_L_CACAGGCGTCGCTTCT	-7.20803	10.5452	BT127_L	BT127	GSC	0.367341	0.230421	0.401737	0.453562	0.551947
BTSC_BT127_L_CACAGGCTCATCTGTT	-8.7493	14.0734	BT127_L	BT127	GSC	0.456221	0.256353	0.403273	0.495766	0.499322
BTSC_BT127_L_CACAGGCTCTTGCCGT	-8.42696	9.93725	BT127_L	BT127	GSC	0.432329	0.27996	0.39759	0.546837	0.312009
BTSC_BT127_L_CACAGTAAGATCCCAT	-7.75451	7.95819	BT127_L	BT127	GSC	0.282158	0.297151	0.467526	0.310324	0.318921
BTSC_BT127_L_CACAGTAAGTGGTAGC	-18.8715	8.60942	BT127_L	BT127	GSC	0.366389	0.233278	0.417981	0.410346	0.38102
BTSC_BT127_L_CACAGTACACAGCGTC	-14.7209	3.12499	BT127_L	BT127	GSC	0.347645	0.200028	0.538598	0.339028	0.22735
BTSC_BT127_L_CACAGTAGTAGCTTGT	-5.18225	11.3038	BT127_L	BT127	GSC	0.403331	0.296421	0.403958	0.473086	0.368172
BTSC_BT127_L_CACAGTATCCAGAGGA	-18.146	-9.10447	BT127_L	BT127	GSC	0.300294	0.188355	0.43302	0.348206	0.150526
BTSC_BT127_L_CACATAGTCTGGCGAC	-12.7439	0.981815	BT127_L	BT127	GSC	0.314345	0.27796	0.570881	0.367767	0.189952
BTSC_BT127_L_CACATTTAGCGTAATA	-22.171	-7.38358	BT127_L	BT127	GSC	0.313554	0.182905	0.473129	0.488968	0.41455
BTSC_BT127_L_CACATTTCATGTTGAC	-5.77488	11.8381	BT127_L	BT127	GSC	0.347151	0.177116	0.442154	0.38658	0.466273
BTSC_BT127_L_CACATTTGTCTTCAAG	-13.1968	12.118	BT127_L	BT127	GSC	0.322513	0.235357	0.525647	0.306805	0.388249
BTSC_BT127_L_CACATTTGTTCCGTCT	-10.5708	13.8735	BT127_L	BT127	GSC	0.472635	0.250524	0.534256	0.4367	0.380899
BTSC_BT127_L_CACCACTAGCGTCAAG	-9.07111	5.3916	BT127_L	BT127	GSC	0.390758	0.365714	0.46436	0.35877	0.543101
BTSC_BT127_L_CACCACTAGGCTAGAC	2.6532	10.4855	BT127_L	BT127	GSC	0.364567	0.332175	0.422201	0.482111	0.475329
BTSC_BT127_L_CACCACTGTCCGTTAA	-7.16773	7.10572	BT127_L	BT127	GSC	0.445789	0.227319	0.407981	0.434352	0.109875
BTSC_BT127_L_CACCAGGAGCGTTCCG	-2.87168	23.5582	BT127_L	BT127	GSC	0.42878	0.269229	0.372791	0.438822	0.497477
BTSC_BT127_L_CACCAGGGTCGGGTCT	-14.1407	4.85615	BT127_L	BT127	GSC	0.534372	0.301643	0.489396	0.419742	0.644664
BTSC_BT127_L_CACCTTGCAGGGCATA	-12.1109	0.553336	BT127_L	BT127	GSC	0.298357	0.196502	0.401609	0.387933	0.336865
BTSC_BT127_L_CACCTTGGTCGTCTTC	-7.91386	3.59592	BT127_L	BT127	GSC	0.318265	0.170589	0.42061	0.412199	0.254693
BTSC_BT127_L_CACCTTGGTGATGATA	-8.6422	15.7743	BT127_L	BT127	GSC	0.351797	0.254074	0.390377	0.559105	0.376402
BTSC_BT127_L_CACTCCAAGGGATCTG	-14.9616	-9.74762	BT127_L	BT127	GSC	0.327698	0.194429	0.398524	0.47109	0.207857
BTSC_BT127_L_CACTCCAAGTACACCT	-9.06773	8.92805	BT127_L	BT127	GSC	0.40592	0.234296	0.490624	0.325612	0.549038
BTSC_BT127_L_CACTCCACATACGCCG	-8.24577	9.30557	BT127_L	BT127	GSC	0.403515	0.304265	0.330628	0.415351	0.362352
BTSC_BT127_L_CACTCCACATCACAAC	-7.16007	6.29393	BT127_L	BT127	GSC	0.40363	0.344927	0.531052	0.366578	0.528141
BTSC_BT127_L_CACTCCAGTCCTCTTG	-6.47711	15.564	BT127_L	BT127	GSC	0.456544	0.224702	0.379904	0.56238	0.619058
BTSC_BT127_L_CACTCCAGTGGCCCTA	-17.6353	2.82243	BT127_L	BT127	GSC	0.335487	0.258592	0.479758	0.362459	0.337336
BTSC_BT127_L_CAGAATCAGGTAGCCA	-16.2333	7.94392	BT127_L	BT127	GSC	0.365149	0.219998	0.345721	0.346632	0.331398
BTSC_BT127_L_CAGAATCCACATGGGA	-17.1231	19.3833	BT127_L	BT127	GSC	0.492065	0.209366	0.512116	0.503814	0.433783
BTSC_BT127_L_CAGAATCCATCCCATC	-12.6465	11.2983	BT127_L	BT127	GSC	0.364675	0.231705	0.43237	0.411849	0.287187
BTSC_BT127_L_CAGAATCTCGCATGAT	-3.16536	12.8555	BT127_L	BT127	GSC	0.455536	0.245759	0.495035	0.264216	0.490268
BTSC_BT127_L_CAGAGAGAGCTAGCCC	-7.71893	13.0406	BT127_L	BT127	GSC	0.481144	0.272412	0.448872	0.378879	0.5914
BTSC_BT127_L_CAGAGAGAGGGTATCG	-9.12456	9.93891	BT127_L	BT127	GSC	0.400882	0.223046	0.47078	0.39875	0.425309
BTSC_BT127_L_CAGAGAGCAACACGCC	4.66798	15.3714	BT127_L	BT127	GSC	0.443743	0.316036	0.450083	0.411692	0.531255
BTSC_BT127_L_CAGAGAGGTCCGACGT	-9.54592	17.917	BT127_L	BT127	GSC	0.687232	0.185083	0.346431	0.436261	0.527749
BTSC_BT127_L_CAGATCACACAACGCC	-17.6319	-3.78176	BT127_L	BT127	GSC	0.324719	0.196762	0.518235	0.394527	0.323204
BTSC_BT127_L_CAGATCACAGTGACAG	-9.82056	20.4439	BT127_L	BT127	GSC	0.438732	0.121324	0.363199	0.477653	0.487047
BTSC_BT127_L_CAGATCAGTTACGCGC	-14.148	0.345308	BT127_L	BT127	GSC	0.323867	0.177862	0.442979	0.438114	0.204727
BTSC_BT127_L_CAGCAGCAGATAGTCA	-17.2345	-8.05328	BT127_L	BT127	GSC	0.317928	0.193682	0.41082	0.460059	0.2995
BTSC_BT127_L_CAGCAGCGTTCCCTTG	-11.5576	3.96604	BT127_L	BT127	GSC	0.437229	0.29728	0.515094	0.261109	0.645357
BTSC_BT127_L_CAGCATAAGCGTTTAC	-21.6704	-0.293414	BT127_L	BT127	GSC	0.380168	0.199856	0.397215	0.373787	0.246505
BTSC_BT127_L_CAGCATAGTAAGTAGT	2.03598	15.3164	BT127_L	BT127	GSC	0.4278	0.274312	0.494223	0.322818	0.4331
BTSC_BT127_L_CAGCCGAAGGCCATAG	-8.74648	13.7092	BT127_L	BT127	GSC	0.451632	0.25898	0.352508	0.514201	0.452105
BTSC_BT127_L_CAGCCGACACCAGTTA	1.21484	15.3143	BT127_L	BT127	GSC	0.472709	0.263421	0.348873	0.517611	0.396837
BTSC_BT127_L_CAGCCGATCAGTTGAC	-11.1925	9.78249	BT127_L	BT127	GSC	0.488892	0.226328	0.382856	0.520089	0.598524
BTSC_BT127_L_CAGCGACAGAAACCAT	-11.3759	7.01688	BT127_L	BT127	GSC	0.346722	0.223941	0.3895	0.269324	0.231843
BTSC_BT127_L_CAGCGACAGGGTTCCC	-6.45424	14.3007	BT127_L	BT127	GSC	0.512139	0.266533	0.30415	0.351782	0.451136
BTSC_BT127_L_CAGCGACCAATTGCTG	-10.9391	17.6986	BT127_L	BT127	GSC	0.520103	0.192185	0.427185	0.475443	0.618001
BTSC_BT127_L_CAGCTAACACTCTGTC	-6.06401	14.8256	BT127_L	BT127	GSC	0.503403	0.217302	0.445681	0.347017	0.613361
BTSC_BT127_L_CAGCTAAGTACAAGTA	-10.4986	10.2345	BT127_L	BT127	GSC	0.358962	0.191915	0.436816	0.381493	0.39807
BTSC_BT127_L_CAGCTGGAGACACTAA	-9.44495	10.6722	BT127_L	BT127	GSC	0.336365	0.300211	0.365063	0.34448	0.474538
BTSC_BT127_L_CAGCTGGAGCACACAG	-14.2323	3.39532	BT127_L	BT127	GSC	0.317316	0.182609	0.42442	0.430783	0.393928
BTSC_BT127_L_CAGCTGGAGTAGTGCG	-10.8199	6.78808	BT127_L	BT127	GSC	0.355325	0.197391	0.376273	0.574335	0.168039
BTSC_BT127_L_CAGCTGGTCCAATGGT	-12.7645	-2.71198	BT127_L	BT127	GSC	0.301196	0.175016	0.499996	0.42212	0.232437
BTSC_BT127_L_CAGGTGCTCTGTGCAA	-11.049	-2.15708	BT127_L	BT127	GSC	0.255161	0.240057	0.432833	0.509772	0.261294
BTSC_BT127_L_CAGTAACAGCGAAGGG	-11.2516	3.43014	BT127_L	BT127	GSC	0.312973	0.230485	0.544417	0.350321	0.488635
BTSC_BT127_L_CAGTAACAGTTAGCGG	-8.20711	14.5837	BT127_L	BT127	GSC	0.431856	0.181219	0.430724	0.427255	0.416409
BTSC_BT127_L_CAGTAACCAAGCCTAT	-3.74931	10.2674	BT127_L	BT127	GSC	0.359922	0.304405	0.459211	0.386002	0.395351
BTSC_BT127_L_CAGTAACCAAGTAATG	-7.0988	21.8251	BT127_L	BT127	GSC	0.451186	0.223953	0.371858	0.509258	0.443395
BTSC_BT127_L_CAGTAACCAATCCAAC	-20.924	-12.8324	BT127_L	BT127	GSC	0.307383	0.216381	0.511742	0.341751	0.293137
BTSC_BT127_L_CAGTAACGTAGCGTGA	-11.6792	5.72754	BT127_L	BT127	GSC	0.384639	0.332981	0.568536	0.398806	0.446465
BTSC_BT127_L_CAGTAACTCAGTCCCT	-0.426776	11.3782	BT127_L	BT127	GSC	0.369233	0.308645	0.435468	0.31527	0.382953
BTSC_BT127_L_CAGTAACTCCACTCCA	2.92562	13.3569	BT127_L	BT127	GSC	0.410779	0.276816	0.440173	0.62471	0.563314
BTSC_BT127_L_CAGTAACTCGAATGGG	-15.5348	5.75948	BT127_L	BT127	GSC	0.343254	0.222417	0.487669	0.401011	0.355864
BTSC_BT127_L_CAGTCCTTCTGCCAGG	-14.0199	-12.7082	BT127_L	BT127	GSC	0.291568	0.225846	0.466248	0.344893	0.182583
BTSC_BT127_L_CATATGGTCAGCAACT	-16.8345	3.80474	BT127_L	BT127	GSC	0.366391	0.18265	0.489359	0.314253	0.302563
BTSC_BT127_L_CATATTCAGTATCGAA	-14.5221	4.0508	BT127_L	BT127	GSC	0.358779	0.291933	0.466269	0.487468	0.459328
BTSC_BT127_L_CATATTCTCCGCGCAA	-15.4181	-6.75101	BT127_L	BT127	GSC	0.294274	0.189482	0.424525	0.430904	0.201845
BTSC_BT127_L_CATCAAGAGCCACGTC	-12.8307	13.1787	BT127_L	BT127	GSC	0.452164	0.199587	0.357866	0.384776	0.340034
BTSC_BT127_L_CATCAAGCAAGTCATC	-5.17359	7.49882	BT127_L	BT127	GSC	0.388867	0.357605	0.515636	0.330228	0.459034
BTSC_BT127_L_CATCAAGGTACCGCTG	-16.5893	-2.23725	BT127_L	BT127	GSC	0.297875	0.215465	0.425344	0.321274	0.32606
BTSC_BT127_L_CATCAGACAGGACCCT	-14.9179	4.85881	BT127_L	BT127	GSC	0.287146	0.294878	0.446142	0.301248	0.399582
BTSC_BT127_L_CATCAGATCATCTGCC	-12.0998	5.13018	BT127_L	BT127	GSC	0.321762	0.325739	0.541921	0.333442	0.374876
BTSC_BT127_L_CATCCACAGTACGCGA	-12.0783	8.04535	BT127_L	BT127	GSC	0.286622	0.257944	0.440881	0.59587	0.31275
BTSC_BT127_L_CATCCACCAATAGAGT	-14.5007	6.38971	BT127_L	BT127	GSC	0.328843	0.224064	0.471617	0.391314	0.439525
BTSC_BT127_L_CATCCACCATTAACCG	-18.8494	1.37848	BT127_L	BT127	GSC	0.377259	0.324597	0.36958	0.407696	0.348006
BTSC_BT127_L_CATCGAACATCGACGC	-6.40424	17.1523	BT127_L	BT127	GSC	0.408066	0.177556	0.451517	0.371295	0.530265
BTSC_BT127_L_CATCGAATCACGCATA	-8.28919	11.7419	BT127_L	BT127	GSC	0.42625	0.286258	0.40092	0.32431	0.587112
BTSC_BT127_L_CATCGAATCCGTCAAA	-12.9664	7.49876	BT127_L	BT127	GSC	0.41327	0.289319	0.469742	0.351168	0.419028
BTSC_BT127_L_CATCGAATCTTGACGA	-10.7299	10.1133	BT127_L	BT127	GSC	0.430542	0.231245	0.427672	0.314578	0.342449
BTSC_BT127_L_CATCGGGAGTACGATA	-19.1658	-5.17852	BT127_L	BT127	GSC	0.337911	0.217407	0.451615	0.333347	0.332868
BTSC_BT127_L_CATCGGGTCACATGCA	-10.2345	5.02625	BT127_L	BT127	GSC	0.432729	0.295763	0.445153	0.348577	0.566062
BTSC_BT127_L_CATCGGGTCATTGCGA	-9.71758	4.30574	BT127_L	BT127	GSC	0.302622	0.210855	0.471781	0.543176	0.223577
BTSC_BT127_L_CATGACATCTCAAACG	-18.3382	14.938	BT127_L	BT127	GSC	0.465007	0.125217	0.396697	0.560264	0.397593
BTSC_BT127_L_CATGGCGAGAATCTCC	-10.6033	12.096	BT127_L	BT127	GSC	0.492433	0.305575	0.515675	0.292926	0.690292
BTSC_BT127_L_CATGGCGAGACCCACC	-2.53274	13.3391	BT127_L	BT127	GSC	0.343006	0.26628	0.520433	0.604969	0.356336
BTSC_BT127_L_CATGGCGAGGAGTTTA	-14.9538	8.58562	BT127_L	BT127	GSC	0.367629	0.241126	0.41184	0.431446	0.328431
BTSC_BT127_L_CATTATCCATAGTAAG	5.71046	13.6289	BT127_L	BT127	GSC	0.398606	0.241938	0.418656	0.263837	0.345499
BTSC_BT127_L_CATTCGCAGCAACGGT	-15.1337	9.61698	BT127_L	BT127	GSC	0.35749	0.245509	0.494515	0.457009	0.42526
BTSC_BT127_L_CATTCGCAGCTGATAA	-14.0677	14.5549	BT127_L	BT127	GSC	0.374264	0.190631	0.473097	0.488799	0.508109
BTSC_BT127_L_CATTCGCCAGGCTCAC	-18.1065	-3.72073	BT127_L	BT127	GSC	0.589168	0.397673	0.296918	0.195602	0.648432
BTSC_BT127_L_CATTCGCGTCCTGCTT	-13.4358	9.41445	BT127_L	BT127	GSC	0.387656	0.144101	0.34068	0.531701	0.174156
BTSC_BT127_L_CATTCGCGTGCGAAAC	-8.75407	12.4225	BT127_L	BT127	GSC	0.3442	0.258374	0.432972	0.588601	0.387133
BTSC_BT127_L_CCAATCCAGCAGACTG	-17.3973	-0.760434	BT127_L	BT127	GSC	0.337263	0.222664	0.427001	0.337188	0.293332
BTSC_BT127_L_CCAATCCGTCGCGGTT	-12.6086	8.77818	BT127_L	BT127	GSC	0.306798	0.208288	0.387382	0.427739	0.504099
BTSC_BT127_L_CCAATCCGTTAAGATG	-12.4611	11.2802	BT127_L	BT127	GSC	0.367712	0.29695	0.620056	0.3536	0.457265
BTSC_BT127_L_CCAATCCGTTCCTCCA	-14.9389	-4.83844	BT127_L	BT127	GSC	0.323413	0.172665	0.423764	0.41463	0.195085
BTSC_BT127_L_CCAATCCTCAACGCTA	-7.39394	12.5052	BT127_L	BT127	GSC	0.493765	0.141072	0.41171	0.405319	0.349529
BTSC_BT127_L_CCACCTAAGAATGTTG	-9.32714	9.84816	BT127_L	BT127	GSC	0.426511	0.358296	0.461808	0.394862	0.59711
BTSC_BT127_L_CCACCTAAGGCTCATT	-2.02692	9.10057	BT127_L	BT127	GSC	0.318705	0.30663	0.541575	0.422107	0.303571
BTSC_BT127_L_CCACCTAAGTTCCACA	-19.6838	2.1187	BT127_L	BT127	GSC	0.305663	0.338354	0.452679	0.357298	0.375229
BTSC_BT127_L_CCACCTAGTTAAGACA	-14.2287	10.0824	BT127_L	BT127	GSC	0.398159	0.184186	0.509889	0.426336	0.314912
BTSC_BT127_L_CCACCTATCAACGGCC	-18.8998	-2.24729	BT127_L	BT127	GSC	0.330676	0.198653	0.4084	0.306353	0.285152
BTSC_BT127_L_CCACCTATCATACGGT	-7.83734	10.0696	BT127_L	BT127	GSC	0.4358	0.300152	0.57683	0.476851	0.574276
BTSC_BT127_L_CCACGGAAGTACGTTC	-15.2887	3.72169	BT127_L	BT127	GSC	0.445048	0.464358	0.450704	0.221655	0.645693
BTSC_BT127_L_CCACGGATCTGATTCT	-9.49174	5.54735	BT127_L	BT127	GSC	0.515703	0.379769	0.334565	0.320585	0.493714
BTSC_BT127_L_CCACTACAGAAGGGTA	-14.3816	-5.16322	BT127_L	BT127	GSC	0.292194	0.228001	0.414847	0.452229	0.337577
BTSC_BT127_L_CCACTACAGCCACGTC	-22.2736	0.430644	BT127_L	BT127	GSC	0.323849	0.196805	0.460412	0.449856	0.364308
BTSC_BT127_L_CCACTACAGCCTTGAT	-13.0361	3.11024	BT127_L	BT127	GSC	0.323416	0.209874	0.417589	0.44198	0.329365
BTSC_BT127_L_CCACTACTCGAGAGCA	-9.58215	21.3168	BT127_L	BT127	GSC	0.458651	0.236791	0.340695	0.38368	0.431708
BTSC_BT127_L_CCAGCGACATTCGACA	-12.1154	7.57073	BT127_L	BT127	GSC	0.491072	0.225808	0.419636	0.34062	0.450038
BTSC_BT127_L_CCAGCGAGTAATCACC	-20.9159	6.71778	BT127_L	BT127	GSC	0.413299	0.212481	0.374696	0.316694	0.403098
BTSC_BT127_L_CCAGCGATCTGTCTAT	-9.75111	12.7094	BT127_L	BT127	GSC	0.341456	0.25169	0.490857	0.329627	0.377457
BTSC_BT127_L_CCATGTCTCAGCTCGG	-4.47876	7.22698	BT127_L	BT127	GSC	0.386454	0.29317	0.415578	0.273921	0.476007
BTSC_BT127_L_CCATGTCTCCTGCCAT	-15.1332	13.9323	BT127_L	BT127	GSC	0.464667	0.183993	0.388978	0.404719	0.523488
BTSC_BT127_L_CCATTCGAGAGCCTAG	-6.24514	12.4839	BT127_L	BT127	GSC	0.357006	0.214776	0.411446	0.453862	0.232763
BTSC_BT127_L_CCATTCGAGGCCATAG	-11.092	15.2637	BT127_L	BT127	GSC	0.478664	0.169682	0.413982	0.422499	0.441496
BTSC_BT127_L_CCATTCGGTAGCGCTC	-6.82604	11.4169	BT127_L	BT127	GSC	0.390251	0.259705	0.418078	0.397041	0.377892
BTSC_BT127_L_CCATTCGTCCATGAGT	-15.0163	6.31274	BT127_L	BT127	GSC	0.33471	0.249025	0.497476	0.39657	0.390455
BTSC_BT127_L_CCATTCGTCCTTGACC	-4.33266	11.2597	BT127_L	BT127	GSC	0.371315	0.269969	0.534102	0.560792	0.265373
BTSC_BT127_L_CCCAATCGTAGAGGAA	-11.7545	13.7269	BT127_L	BT127	GSC	0.553033	0.241422	0.37141	0.31012	0.729683
BTSC_BT127_L_CCCAATCGTCAAACTC	-8.76322	8.78236	BT127_L	BT127	GSC	0.475827	0.298988	0.455717	0.40029	0.566706
BTSC_BT127_L_CCCAGTTAGGAGTCTG	-17.6577	3.89152	BT127_L	BT127	GSC	0.341911	0.232603	0.456905	0.279606	0.401536
BTSC_BT127_L_CCCAGTTTCCTAGAAC	-6.68004	9.51028	BT127_L	BT127	GSC	0.451963	0.256792	0.496609	0.252467	0.596402
BTSC_BT127_L_CCCATACTCACTCTTA	-16.3238	10.4419	BT127_L	BT127	GSC	0.480744	0.180093	0.3834	0.259505	0.391512
BTSC_BT127_L_CCCATACTCCTCGCAT	-6.64554	10.7656	BT127_L	BT127	GSC	0.470093	0.217882	0.4143	0.391207	0.425059
BTSC_BT127_L_CCCATACTCGTGGTCG	-9.0256	8.71438	BT127_L	BT127	GSC	0.40177	0.254524	0.427133	0.376261	0.489313
BTSC_BT127_L_CCCTCCTAGGCTCATT	-18.9292	-7.81615	BT127_L	BT127	GSC	0.312285	0.172996	0.447637	0.358669	0.250651
BTSC_BT127_L_CCCTCCTTCTAACGGT	-11.077	9.9067	BT127_L	BT127	GSC	0.379928	0.191726	0.433965	0.470026	0.488445
BTSC_BT127_L_CCGGGATAGTGGGCTA	-17.9778	20.7776	BT127_L	BT127	GSC	0.376101	0.192127	0.40485	0.451811	0.351551
BTSC_BT127_L_CCGGTAGAGTACGTAA	-11.051	8.81931	BT127_L	BT127	GSC	0.426942	0.244778	0.460633	0.292326	0.433919
BTSC_BT127_L_CCGGTAGAGTAGTGCG	-2.79872	3.54419	BT127_L	BT127	GSC	0.368615	0.388592	0.451715	0.376907	0.589006
BTSC_BT127_L_CCGGTAGGTGACGGTA	-21.352	17.0963	BT127_L	BT127	GSC	0.350402	0.239247	0.457273	0.52033	0.413431
BTSC_BT127_L_CCGGTAGGTGGTAACG	-16.5578	2.78645	BT127_L	BT127	GSC	0.334896	0.172323	0.429157	0.372122	0.164181
BTSC_BT127_L_CCGGTAGTCGTTTGCC	-14.9789	-2.63588	BT127_L	BT127	GSC	0.327215	0.188268	0.482945	0.403281	0.315382
BTSC_BT127_L_CCGGTAGTCTACTATC	0.594006	13.6343	BT127_L	BT127	GSC	0.391635	0.294237	0.449702	0.45391	0.560168
BTSC_BT127_L_CCGTACTCACGGCCAT	-18.9423	18.7449	BT127_L	BT127	GSC	0.423335	0.203619	0.342306	0.531258	0.372756
BTSC_BT127_L_CCGTACTCATCCCATC	-3.91282	16.6811	BT127_L	BT127	GSC	0.454031	0.266421	0.292142	0.454975	0.584331
BTSC_BT127_L_CCGTACTGTTTGTTTC	-13.991	10.0948	BT127_L	BT127	GSC	0.48715	0.254188	0.440481	0.543092	0.512631
BTSC_BT127_L_CCGTGGAAGGCTCTTA	1.20401	19.7615	BT127_L	BT127	GSC	0.45514	0.254225	0.394379	0.438227	0.513284
BTSC_BT127_L_CCGTGGACAAGGACTG	-18.1889	1.9748	BT127_L	BT127	GSC	0.319811	0.186296	0.409184	0.504869	0.33123
BTSC_BT127_L_CCGTGGATCGCTGATA	-10.7496	14.6153	BT127_L	BT127	GSC	0.400127	0.24446	0.472275	0.513368	0.388383
BTSC_BT127_L_CCGTTCAAGCTGCAAG	-8.35312	10.6254	BT127_L	BT127	GSC	0.50619	0.315703	0.302104	0.46303	0.423137
BTSC_BT127_L_CCGTTCATCAGGCAAG	-2.97327	8.16222	BT127_L	BT127	GSC	0.441434	0.401711	0.438213	0.427529	0.550257
BTSC_BT127_L_CCTAAAGAGAACTGTA	-16.5485	8.61067	BT127_L	BT127	GSC	0.357962	0.152606	0.518861	0.479865	0.38928
BTSC_BT127_L_CCTAAAGCACGGTGTC	-15.4276	8.11755	BT127_L	BT127	GSC	0.460425	0.330881	0.41106	0.378175	0.631133
BTSC_BT127_L_CCTAAAGTCAGAGACG	-16.405	7.52912	BT127_L	BT127	GSC	0.341518	0.239717	0.453222	0.49684	0.477919
BTSC_BT127_L_CCTACACAGGCTAGCA	-5.03075	9.06196	BT127_L	BT127	GSC	0.456608	0.278781	0.453879	0.240812	0.34641
BTSC_BT127_L_CCTACACAGTGTACCT	-0.751659	21.8588	BT127_L	BT127	GSC	0.491679	0.113885	0.322897	0.497181	0.286135
BTSC_BT127_L_CCTACACCAAACCCAT	-12.8621	8.72077	BT127_L	BT127	GSC	0.470277	0.304988	0.369136	0.26114	0.624421
BTSC_BT127_L_CCTACACGTAGAGGAA	-7.12868	10.8653	BT127_L	BT127	GSC	0.405893	0.236371	0.477931	0.388152	0.458776
BTSC_BT127_L_CCTACCACAACGATCT	-5.29045	13.7975	BT127_L	BT127	GSC	0.445817	0.289218	0.399959	0.425542	0.544565
BTSC_BT127_L_CCTACCACATAAAGGT	-4.68514	6.11354	BT127_L	BT127	GSC	0.359539	0.330066	0.537544	0.406054	0.52813
BTSC_BT127_L_CCTACCATCGGTGTTA	-6.80651	7.04589	BT127_L	BT127	GSC	0.372339	0.226816	0.46038	0.418505	0.310139
BTSC_BT127_L_CCTACCATCTTTACAC	-6.57804	11.9595	BT127_L	BT127	GSC	0.451608	0.238819	0.404	0.475238	0.58647
BTSC_BT127_L_CCTAGCTCAGCGAACA	-15.1389	2.4571	BT127_L	BT127	GSC	0.29935	0.227159	0.456528	0.454043	0.218284
BTSC_BT127_L_CCTAGCTCAGTATAAG	-13.4464	-4.09165	BT127_L	BT127	GSC	0.283988	0.226563	0.411399	0.284602	0.234185
BTSC_BT127_L_CCTAGCTCATTGGCGC	-5.55634	13.0926	BT127_L	BT127	GSC	0.447343	0.309478	0.386874	0.240814	0.444224
BTSC_BT127_L_CCTAGCTTCACGACTA	-16.2348	-1.33568	BT127_L	BT127	GSC	0.32989	0.172193	0.41483	0.332021	0.227548
BTSC_BT127_L_CCTAGCTTCACTGGGC	-10.1063	7.73626	BT127_L	BT127	GSC	0.359499	0.2447	0.43849	0.354718	0.235147
BTSC_BT127_L_CCTATTACATACGCTA	-11.7022	8.59021	BT127_L	BT127	GSC	0.441919	0.184672	0.412383	0.329455	0.406828
BTSC_BT127_L_CCTATTAGTCCGTCAG	-12.444	11.829	BT127_L	BT127	GSC	0.410204	0.164797	0.492655	0.561024	0.341348
BTSC_BT127_L_CCTATTAGTTCACCTC	-17.7328	-12.6061	BT127_L	BT127	GSC	0.314276	0.195788	0.423522	0.357062	0.191849
BTSC_BT127_L_CCTATTATCTAAGCCA	-13.6782	14.1742	BT127_L	BT127	GSC	0.395184	0.207022	0.436353	0.427104	0.34243
BTSC_BT127_L_CCTATTATCTTCATGT	-17.7481	0.870647	BT127_L	BT127	GSC	0.376177	0.214385	0.469793	0.383069	0.369845
BTSC_BT127_L_CCTCAGTCATAGAAAC	-4.95023	13.7587	BT127_L	BT127	GSC	0.338439	0.200825	0.360696	0.379914	0.332951
BTSC_BT127_L_CCTCAGTTCTCCTATA	-4.77694	16.7769	BT127_L	BT127	GSC	0.456945	0.203729	0.357116	0.608794	0.5687
BTSC_BT127_L_CCTCTGAAGTCCTCCT	-13.2732	12.63	BT127_L	BT127	GSC	0.370208	0.237715	0.377993	0.406879	0.450948
BTSC_BT127_L_CCTCTGACATGTCGAT	-11.3938	9.0685	BT127_L	BT127	GSC	0.324087	0.224921	0.385974	0.294271	0.403523
BTSC_BT127_L_CCTCTGAGTTCCTCCA	-6.34711	11.6452	BT127_L	BT127	GSC	0.442532	0.205323	0.408014	0.301963	0.59498
BTSC_BT127_L_CCTCTGATCCGTAGTA	1.72649	8.3743	BT127_L	BT127	GSC	0.340827	0.296737	0.553377	0.465074	0.477391
BTSC_BT127_L_CCTTACGAGAACAATC	-13.9532	8.42286	BT127_L	BT127	GSC	0.381266	0.243375	0.46788	0.350422	0.461608
BTSC_BT127_L_CCTTACGAGAATTGTG	-11.8668	6.1448	BT127_L	BT127	GSC	0.473875	0.267121	0.417646	0.355006	0.346991
BTSC_BT127_L_CCTTACGCATGAAGTA	-4.17566	16.8668	BT127_L	BT127	GSC	0.28907	0.298645	0.415076	0.467324	0.46039
BTSC_BT127_L_CCTTACGGTCTTCGTC	-14.9828	-4.22199	BT127_L	BT127	GSC	0.303734	0.166168	0.411553	0.455711	0.265196
BTSC_BT127_L_CCTTCCCCAGTGGGAT	-9.33419	14.4222	BT127_L	BT127	GSC	0.646669	0.205555	0.302459	0.410233	0.62491
BTSC_BT127_L_CCTTCCCGTGCTAGCC	-14.8177	-2.35181	BT127_L	BT127	GSC	0.289378	0.197862	0.415461	0.355812	0.270101
BTSC_BT127_L_CCTTCGAAGAGAACAG	-13.042	6.38946	BT127_L	BT127	GSC	0.338921	0.173727	0.430266	0.453893	0.348446
BTSC_BT127_L_CCTTCGAAGTATTGGA	-6.09752	9.25319	BT127_L	BT127	GSC	0.395897	0.286684	0.41156	0.246099	0.383122
BTSC_BT127_L_CCTTCGACAGACTCGC	-14.2874	19.2232	BT127_L	BT127	GSC	0.388073	0.236634	0.353479	0.518528	0.486246
BTSC_BT127_L_CCTTCGAGTTTAGCTG	-12.7646	10.2539	BT127_L	BT127	GSC	0.351508	0.175637	0.476247	0.565246	0.264768
BTSC_BT127_L_CCTTCGATCAGTGCAT	-6.24673	6.26945	BT127_L	BT127	GSC	0.360574	0.274946	0.487705	0.27195	0.381241
BTSC_BT127_L_CCTTCGATCGCAAGCC	3.44374	19.001	BT127_L	BT127	GSC	0.440251	0.23976	0.493364	0.510967	0.431185
BTSC_BT127_L_CCTTCGATCTTATCTG	-16.8229	11.6075	BT127_L	BT127	GSC	0.381565	0.188031	0.492393	0.510722	0.320293
BTSC_BT127_L_CCTTTCTAGCGGATCA	-1.65356	13.5226	BT127_L	BT127	GSC	0.390563	0.213564	0.516446	0.274876	0.457794
BTSC_BT127_L_CCTTTCTGTAGTAGTA	-13.6456	11.3025	BT127_L	BT127	GSC	0.45909	0.23908	0.452458	0.202604	0.511655
BTSC_BT127_L_CGAATGTCAAGCGATG	-10.4679	4.90483	BT127_L	BT127	GSC	0.310765	0.204012	0.443899	0.321227	0.366116
BTSC_BT127_L_CGAATGTCACGGATAG	-12.0074	13.262	BT127_L	BT127	GSC	0.386363	0.164527	0.369957	0.376942	0.4574
BTSC_BT127_L_CGAATGTGTTAAGGGC	-9.11092	9.53566	BT127_L	BT127	GSC	0.309422	0.198135	0.393398	0.421911	0.350935
BTSC_BT127_L_CGAATGTTCACATACG	-8.34842	6.60143	BT127_L	BT127	GSC	0.277789	0.265263	0.423187	0.516114	0.280049
BTSC_BT127_L_CGAATGTTCCTAGGGC	-12.6174	2.13763	BT127_L	BT127	GSC	0.328317	0.251825	0.456126	0.219075	0.329912
BTSC_BT127_L_CGACCTTAGCCTCGTG	-16.6365	3.30666	BT127_L	BT127	GSC	0.322498	0.213745	0.421367	0.396885	0.270525
BTSC_BT127_L_CGACCTTGTAAATACG	-6.01082	10.1984	BT127_L	BT127	GSC	0.371315	0.333098	0.474353	0.371116	0.470741
BTSC_BT127_L_CGACCTTGTAGCTAAA	-7.23809	7.39197	BT127_L	BT127	GSC	0.449999	0.263452	0.509589	0.417296	0.477001
BTSC_BT127_L_CGACTTCAGCGATAGC	-22.3341	5.50651	BT127_L	BT127	GSC	0.434848	0.16226	0.383745	0.277758	0.395826
BTSC_BT127_L_CGACTTCAGGATGTAT	-12.578	16.7675	BT127_L	BT127	GSC	0.436196	0.217463	0.397338	0.322022	0.556435
BTSC_BT127_L_CGACTTCGTCTAGCGC	-14.1042	2.7806	BT127_L	BT127	GSC	0.342584	0.205541	0.391809	0.247725	0.460428
BTSC_BT127_L_CGACTTCTCAGGTTCA	-15.2881	8.98148	BT127_L	BT127	GSC	0.373527	0.160931	0.465309	0.461536	0.443879
BTSC_BT127_L_CGAGAAGGTGGTCTCG	-17.1955	12.3907	BT127_L	BT127	GSC	0.464777	0.274575	0.269549	0.465216	0.701601
BTSC_BT127_L_CGAGAAGTCGGTTAAC	5.85513	13.3168	BT127_L	BT127	GSC	0.363245	0.283464	0.422034	0.383544	0.405359
BTSC_BT127_L_CGAGAAGTCTATGTGG	-14.8615	11.9903	BT127_L	BT127	GSC	0.362397	0.208013	0.463553	0.41798	0.466779
BTSC_BT127_L_CGAGCACAGTCATCCA	-9.20201	9.50648	BT127_L	BT127	GSC	0.439842	0.249316	0.517603	0.407533	0.388435
BTSC_BT127_L_CGAGCCATCATAGCAC	-15.1647	12.5563	BT127_L	BT127	GSC	0.292251	0.278058	0.403969	0.512203	0.381277
BTSC_BT127_L_CGATCGGAGAGGTTGC	-4.13879	11.0928	BT127_L	BT127	GSC	0.391188	0.266338	0.489555	0.429271	0.424802
BTSC_BT127_L_CGATCGGGTCGATTGT	-19.5331	-11.5645	BT127_L	BT127	GSC	0.293226	0.201607	0.533341	0.41919	0.162256
BTSC_BT127_L_CGATCGGGTTTGACTG	-11.3315	-5.87886	BT127_L	BT127	GSC	0.29391	0.228192	0.425248	0.415794	0.305562
BTSC_BT127_L_CGATCGGGTTTGTTTC	2.75877	18.7618	BT127_L	BT127	GSC	0.405986	0.255352	0.379121	0.462746	0.39049
BTSC_BT127_L_CGATGGCAGTGGTAGC	-17.0014	-14.9997	BT127_L	BT127	GSC	0.28842	0.208686	0.44501	0.411096	0.216723
BTSC_BT127_L_CGATGGCCAGTATAAG	-4.62823	17.9871	BT127_L	BT127	GSC	0.483199	0.183552	0.307486	0.483254	0.383049
BTSC_BT127_L_CGATGGCGTCGCGTGT	-10.2529	10.1171	BT127_L	BT127	GSC	0.369611	0.25707	0.472233	0.556692	0.260721
BTSC_BT127_L_CGATGTAGTATAGGTA	-11.7667	10.2827	BT127_L	BT127	GSC	0.346819	0.198567	0.441847	0.623651	0.243995
BTSC_BT127_L_CGATGTAGTTAAGTAG	-16.4262	-0.357052	BT127_L	BT127	GSC	0.314638	0.2	0.42396	0.370477	0.260498
BTSC_BT127_L_CGATGTAGTTCGAATC	-11.8567	4.2777	BT127_L	BT127	GSC	0.336318	0.217277	0.546299	0.438327	0.247217
BTSC_BT127_L_CGATTGATCCTAGTGA	0.961779	18.5166	BT127_L	BT127	GSC	0.401725	0.294124	0.379799	0.394763	0.381337
BTSC_BT127_L_CGATTGATCGGATGGA	-18.1993	-2.82071	BT127_L	BT127	GSC	0.30262	0.165176	0.399768	0.38879	0.243699
BTSC_BT127_L_CGCCAAGAGGAGTCTG	-13.0104	15.1411	BT127_L	BT127	GSC	0.434244	0.2477	0.443167	0.440095	0.451944
BTSC_BT127_L_CGCCAAGCACAGGTTT	-1.48924	15.0216	BT127_L	BT127	GSC	0.401712	0.232184	0.481651	0.296195	0.564447
BTSC_BT127_L_CGCCAAGGTCGCGAAA	-16.4908	9.37083	BT127_L	BT127	GSC	0.408668	0.269414	0.420578	0.444084	0.493467
BTSC_BT127_L_CGCCAAGTCCAAGTAC	-0.435667	10.1439	BT127_L	BT127	GSC	0.360959	0.308378	0.547392	0.469712	0.487548
BTSC_BT127_L_CGCGTTTAGCTAGCCC	-10.3275	8.08866	BT127_L	BT127	GSC	0.396687	0.273275	0.385313	0.364725	0.603191
BTSC_BT127_L_CGCGTTTAGTACGTAA	-2.72662	14.6021	BT127_L	BT127	GSC	0.444386	0.27048	0.468508	0.396656	0.55945
BTSC_BT127_L_CGCGTTTGTCAAAGAT	-8.68289	14.8933	BT127_L	BT127	GSC	0.299179	0.222592	0.508845	0.596981	0.327939
BTSC_BT127_L_CGCGTTTTCTTATCTG	-6.17188	5.98791	BT127_L	BT127	GSC	0.314581	0.218186	0.449427	0.354926	0.423858
BTSC_BT127_L_CGCTATCAGGATATAC	-11.6764	13.202	BT127_L	BT127	GSC	0.522561	0.266435	0.34602	0.424684	0.634543
BTSC_BT127_L_CGCTATCCAAGGACTG	-17.363	-0.92718	BT127_L	BT127	GSC	0.363114	0.213836	0.482186	0.396206	0.449047
BTSC_BT127_L_CGCTTCAAGGGAGTAA	-1.88346	16.0248	BT127_L	BT127	GSC	0.431152	0.226249	0.395504	0.359001	0.414505
BTSC_BT127_L_CGGACACCATACGCTA	-17.6065	9.41253	BT127_L	BT127	GSC	0.376776	0.203456	0.469263	0.459057	0.367486
BTSC_BT127_L_CGGACACGTTAAGATG	-11.441	10.8682	BT127_L	BT127	GSC	0.305085	0.214458	0.387577	0.490406	0.35102
BTSC_BT127_L_CGGACACTCAAAGACA	-9.82335	18.5152	BT127_L	BT127	GSC	0.366502	0.209246	0.482465	0.295174	0.326321
BTSC_BT127_L_CGGACGTAGAGTGAGA	-15.8471	8.06834	BT127_L	BT127	GSC	0.356207	0.230632	0.450392	0.403645	0.432261
BTSC_BT127_L_CGGACGTAGTACGCGA	-12.821	16.0515	BT127_L	BT127	GSC	0.351418	0.238469	0.454587	0.583456	0.567635
BTSC_BT127_L_CGGACGTGTTCTGGTA	-11.6935	0.365278	BT127_L	BT127	GSC	0.302723	0.191726	0.444567	0.416696	0.217163
BTSC_BT127_L_CGGACTGAGTCCCACG	-12.7702	12.8157	BT127_L	BT127	GSC	0.520915	0.165084	0.303763	0.471443	0.401818
BTSC_BT127_L_CGGACTGCAATCTGCA	-16.2672	0.282832	BT127_L	BT127	GSC	0.351391	0.171817	0.436527	0.414868	0.363104
BTSC_BT127_L_CGGACTGCACGTCTCT	-3.54739	11.8832	BT127_L	BT127	GSC	0.389941	0.317773	0.440775	0.32925	0.459485
BTSC_BT127_L_CGGACTGTCAGATAAG	1.75642	18.5454	BT127_L	BT127	GSC	0.347456	0.250686	0.454128	0.562689	0.482544
BTSC_BT127_L_CGGAGCTAGAGCTGCA	-2.65138	11.3522	BT127_L	BT127	GSC	0.368815	0.242403	0.471456	0.525848	0.353412
BTSC_BT127_L_CGGAGCTCAATGGATA	-5.06277	4.03975	BT127_L	BT127	GSC	0.362707	0.309349	0.525468	0.469346	0.387268
BTSC_BT127_L_CGGAGCTTCCATGCTC	-11.9706	19.2461	BT127_L	BT127	GSC	0.405729	0.224007	0.331174	0.545086	0.438338
BTSC_BT127_L_CGGAGTCGTCGCATAT	-2.68205	5.60428	BT127_L	BT127	GSC	0.29218	0.29049	0.462968	0.58697	0.552235
BTSC_BT127_L_CGGAGTCTCAACACTG	-12.7566	11.7136	BT127_L	BT127	GSC	0.470673	0.268078	0.428755	0.238891	0.543118
BTSC_BT127_L_CGGCTAGAGTTAGCGG	-21.0417	-8.00679	BT127_L	BT127	GSC	0.323425	0.207546	0.393131	0.349894	0.218219
BTSC_BT127_L_CGGCTAGGTACCATCA	-16.7526	7.53024	BT127_L	BT127	GSC	0.385009	0.237842	0.409996	0.397613	0.440335
BTSC_BT127_L_CGGCTAGGTCGCTTCT	-13.4794	21.4855	BT127_L	BT127	GSC	0.480922	0.22319	0.323949	0.720684	0.563883
BTSC_BT127_L_CGGCTAGGTCTTGTCC	-8.27302	10.6478	BT127_L	BT127	GSC	0.409181	0.291823	0.390415	0.276985	0.518233
BTSC_BT127_L_CGGCTAGTCTGTCAAG	-17.3196	0.247399	BT127_L	BT127	GSC	0.320761	0.229448	0.410558	0.418433	0.406165
BTSC_BT127_L_CGGGTCAGTCACCTAA	-13.3512	-2.83132	BT127_L	BT127	GSC	0.279328	0.203639	0.555725	0.322519	0.186079
BTSC_BT127_L_CGGGTCATCCGTTGCT	-11.6168	-3.35431	BT127_L	BT127	GSC	0.304692	0.183216	0.425642	0.362386	0.140216
BTSC_BT127_L_CGGTTAAGTATGGTTC	-7.78213	7.18677	BT127_L	BT127	GSC	0.516162	0.384513	0.536747	0.307603	0.553694
BTSC_BT127_L_CGTAGGCGTTGTGGCC	-11.3197	5.77537	BT127_L	BT127	GSC	0.422094	0.367776	0.420015	0.337262	0.571968
BTSC_BT127_L_CGTCACTCAATCCAAC	-15.1559	3.7052	BT127_L	BT127	GSC	0.298333	0.209914	0.420125	0.39392	0.246121
BTSC_BT127_L_CGTCACTCAGCTGCAC	-15.3624	1.13964	BT127_L	BT127	GSC	0.333964	0.20376	0.42403	0.396356	0.282734
BTSC_BT127_L_CGTCACTCAGGCAGTA	-18.3406	-3.69128	BT127_L	BT127	GSC	0.336208	0.176427	0.399479	0.455196	0.331779
BTSC_BT127_L_CGTCAGGCAAGCTGGA	-14.1874	17.7936	BT127_L	BT127	GSC	0.470733	0.145518	0.182547	0.614069	0.587027
BTSC_BT127_L_CGTCAGGCATTGGTAC	-3.64751	7.21353	BT127_L	BT127	GSC	0.315201	0.199676	0.47945	0.53377	0.317324
BTSC_BT127_L_CGTCAGGTCCAAATGC	-12.1522	18.3884	BT127_L	BT127	GSC	0.522849	0.186823	0.341403	0.418855	0.590219
BTSC_BT127_L_CGTCAGGTCCACGTGG	-12.7171	9.12969	BT127_L	BT127	GSC	0.352795	0.215708	0.430073	0.40797	0.446456
BTSC_BT127_L_CGTCAGGTCGTACGGC	-15.3766	4.7942	BT127_L	BT127	GSC	0.338356	0.302957	0.550001	0.350805	0.497924
BTSC_BT127_L_CGTCCATTCAAGGCTT	-15.857	5.09253	BT127_L	BT127	GSC	0.419706	0.202429	0.532034	0.353091	0.363152
BTSC_BT127_L_CGTCTACAGCCTATGT	-9.74534	17.0077	BT127_L	BT127	GSC	0.465276	0.317369	0.365973	0.472586	0.59227
BTSC_BT127_L_CGTCTACAGGCATGGT	-11.151	1.56696	BT127_L	BT127	GSC	0.299945	0.164769	0.449989	0.361597	0.299454
BTSC_BT127_L_CGTCTACAGGTGTTAA	-11.1721	-4.71939	BT127_L	BT127	GSC	0.287032	0.219631	0.484775	0.351277	0.168616
BTSC_BT127_L_CGTCTACGTCTGATCA	-13.1852	9.11728	BT127_L	BT127	GSC	0.304789	0.236853	0.371331	0.375513	0.351848
BTSC_BT127_L_CGTGAGCAGAACAATC	-7.30892	13.9817	BT127_L	BT127	GSC	0.342777	0.188471	0.394364	0.630588	0.316644
BTSC_BT127_L_CGTGAGCAGCAACGGT	-0.410341	9.4966	BT127_L	BT127	GSC	0.38591	0.397586	0.396488	0.429136	0.570275
BTSC_BT127_L_CGTGAGCAGGTGTTAA	-8.41087	5.93085	BT127_L	BT127	GSC	0.359796	0.235225	0.444796	0.491949	0.23214
BTSC_BT127_L_CGTGAGCGTCTCGTTC	-12.015	5.33485	BT127_L	BT127	GSC	0.330741	0.21492	0.390973	0.430541	0.192074
BTSC_BT127_L_CGTGAGCGTTACTGAC	-12.2264	4.0484	BT127_L	BT127	GSC	0.30972	0.325934	0.469798	0.387615	0.417813
BTSC_BT127_L_CGTGAGCTCGTTTAGG	5.863	21.1139	BT127_L	BT127	GSC	0.398826	0.259224	0.320864	0.463683	0.542791
BTSC_BT127_L_CGTGTAACACTTAAGC	-6.19867	2.14755	BT127_L	BT127	GSC	0.341136	0.262468	0.443932	0.565276	0.388551
BTSC_BT127_L_CGTGTAACATATACCG	-4.73034	10.9045	BT127_L	BT127	GSC	0.394616	0.198694	0.476412	0.613783	0.304847
BTSC_BT127_L_CGTGTAATCTTGACGA	-11.1672	4.26379	BT127_L	BT127	GSC	0.329857	0.245399	0.441002	0.275666	0.252597
BTSC_BT127_L_CGTGTCTAGCGTGAGT	-15.9115	-14.436	BT127_L	BT127	GSC	0.266652	0.181837	0.411299	0.374721	0.243127
BTSC_BT127_L_CGTGTCTAGCTAAACA	1.90414	17.7991	BT127_L	BT127	GSC	0.370143	0.244582	0.358802	0.597668	0.282925
BTSC_BT127_L_CGTGTCTCAAGTAGTA	-17.0197	13.0712	BT127_L	BT127	GSC	0.302989	0.21112	0.353636	0.436737	0.271134
BTSC_BT127_L_CGTTAGACACCTTGTC	-13.6343	0.282223	BT127_L	BT127	GSC	0.318093	0.183678	0.490744	0.434071	0.33036
BTSC_BT127_L_CGTTCTGGTTAAGATG	-13.7778	-3.9244	BT127_L	BT127	GSC	0.275212	0.297921	0.586152	0.358898	0.292781
BTSC_BT127_L_CGTTCTGTCTAAGCCA	-7.22765	9.04142	BT127_L	BT127	GSC	0.393303	0.260097	0.400108	0.314575	0.440444
BTSC_BT127_L_CGTTGGGAGCCTATGT	-5.22353	2.6955	BT127_L	BT127	GSC	0.360537	0.431943	0.542801	0.282341	0.537839
BTSC_BT127_L_CTAACTTAGGGTATCG	-8.16267	12.5884	BT127_L	BT127	GSC	0.318858	0.213212	0.455083	0.416252	0.148451
BTSC_BT127_L_CTAACTTCAGCTTAAC	-18.6507	-3.75126	BT127_L	BT127	GSC	0.313549	0.196703	0.4613	0.429369	0.384623
BTSC_BT127_L_CTAACTTGTTGACGTT	-17.1636	8.37406	BT127_L	BT127	GSC	0.366522	0.182118	0.350636	0.5288	0.426116
BTSC_BT127_L_CTAACTTTCCGGGTGT	-14.8303	3.31411	BT127_L	BT127	GSC	0.306525	0.211452	0.504787	0.381851	0.377819
BTSC_BT127_L_CTAAGACGTACCTACA	-19.0996	-6.53325	BT127_L	BT127	GSC	0.3322	0.20621	0.437094	0.419829	0.342235
BTSC_BT127_L_CTAAGACGTTAGAACA	-17.1181	-4.95476	BT127_L	BT127	GSC	0.277064	0.205461	0.484888	0.407221	0.219587
BTSC_BT127_L_CTAAGACTCAATCTCT	1.94252	6.62289	BT127_L	BT127	GSC	0.307801	0.217317	0.572723	0.426867	0.322716
BTSC_BT127_L_CTAATGGGTGAGGGAG	-11.382	11.3202	BT127_L	BT127	GSC	0.301063	0.266231	0.516031	0.347438	0.268159
BTSC_BT127_L_CTACACCAGAGTACAT	-8.23743	13.8037	BT127_L	BT127	GSC	0.551185	0.191537	0.309951	0.397795	0.471769
BTSC_BT127_L_CTACACCGTCCTCCAT	-13.1906	8.31096	BT127_L	BT127	GSC	0.42009	0.219891	0.327631	0.515492	0.299541
BTSC_BT127_L_CTACACCTCGGATGTT	-13.5677	-5.59211	BT127_L	BT127	GSC	0.308799	0.207558	0.470327	0.41527	0.120935
BTSC_BT127_L_CTACCCAAGAATCTCC	-9.13597	13.3406	BT127_L	BT127	GSC	0.41485	0.215181	0.367955	0.36078	0.400842
BTSC_BT127_L_CTACCCAAGACCCACC	-11.3832	21.3596	BT127_L	BT127	GSC	0.414861	0.22535	0.337535	0.335632	0.55056
BTSC_BT127_L_CTACCCATCTCAACTT	2.35546	15.4392	BT127_L	BT127	GSC	0.38952	0.297446	0.481284	0.362812	0.500898
BTSC_BT127_L_CTACCCATCTCGCTTG	-11.0853	3.82161	BT127_L	BT127	GSC	0.398767	0.429723	0.344953	0.293618	0.595686
BTSC_BT127_L_CTACGTCAGTCAATAG	-7.05395	-2.02264	BT127_L	BT127	GSC	0.30505	0.420917	0.450861	0.3207	0.501746
BTSC_BT127_L_CTACGTCCAATGTAAG	-6.96017	12.4701	BT127_L	BT127	GSC	0.470071	0.216732	0.36871	0.37244	0.557127
BTSC_BT127_L_CTACGTCCATCTACGA	-1.7031	13.43	BT127_L	BT127	GSC	0.393578	0.268342	0.42324	0.559623	0.409418
BTSC_BT127_L_CTACGTCGTCCGAGTC	-18.4587	-11.533	BT127_L	BT127	GSC	0.296271	0.217021	0.495151	0.353697	0.296538
BTSC_BT127_L_CTACGTCGTCGCCATG	-14.793	-6.98074	BT127_L	BT127	GSC	0.282599	0.202171	0.398389	0.356663	0.323443
BTSC_BT127_L_CTACGTCGTTCCACTC	-10.3006	1.60079	BT127_L	BT127	GSC	0.358594	0.428489	0.309755	0.221974	0.358872
BTSC_BT127_L_CTAGAGTAGACTCGGA	-10.4885	6.46176	BT127_L	BT127	GSC	0.291038	0.249794	0.509109	0.426501	0.484974
BTSC_BT127_L_CTAGAGTCAACTGCGC	-18.1036	14.9208	BT127_L	BT127	GSC	0.343355	0.174655	0.452735	0.516727	0.38294
BTSC_BT127_L_CTAGAGTCAAGCCTAT	-15.8131	13.3897	BT127_L	BT127	GSC	0.342202	0.19736	0.402606	0.45414	0.472297
BTSC_BT127_L_CTAGAGTCACCCATGG	-11.7879	1.50375	BT127_L	BT127	GSC	0.29908	0.200008	0.423498	0.360842	0.309993
BTSC_BT127_L_CTAGCCTAGGCTACGA	-8.32627	11.5041	BT127_L	BT127	GSC	0.442059	0.169308	0.320348	0.45885	0.271712
BTSC_BT127_L_CTAGCCTCACGACGAA	-11.9161	-1.9356	BT127_L	BT127	GSC	0.307878	0.185905	0.404084	0.365261	0.201349
BTSC_BT127_L_CTAGCCTTCAACGGGA	-16.9915	6.22143	BT127_L	BT127	GSC	0.37625	0.191771	0.446144	0.295477	0.332923
BTSC_BT127_L_CTAGCCTTCCTATGTT	-23.0946	14.7891	BT127_L	BT127	GSC	0.378422	0.237053	0.45842	0.514022	0.438366
BTSC_BT127_L_CTAGCCTTCGCGTAGC	-8.15702	14.5386	BT127_L	BT127	GSC	0.535143	0.201231	0.469738	0.39214	0.427178
BTSC_BT127_L_CTAGTGAAGTGACTCT	-16.7164	8.59904	BT127_L	BT127	GSC	0.585762	0.298974	0.367575	0.299506	0.838927
BTSC_BT127_L_CTAGTGAGTCAGGACA	-4.56568	21.9099	BT127_L	BT127	GSC	0.372482	0.225945	0.453653	0.458608	0.613953
BTSC_BT127_L_CTCACACAGTAGGCCA	-4.5642	7.88773	BT127_L	BT127	GSC	0.445882	0.301065	0.461661	0.377806	0.551154
BTSC_BT127_L_CTCAGAACAGGGAGAG	-18.0143	9.88726	BT127_L	BT127	GSC	0.354242	0.230581	0.385416	0.330106	0.487494
BTSC_BT127_L_CTCAGAAGTTCAACCA	-8.45368	9.39024	BT127_L	BT127	GSC	0.425253	0.274077	0.418343	0.367995	0.532264
BTSC_BT127_L_CTCATTAAGACTGTAA	-12.2043	2.90779	BT127_L	BT127	GSC	0.391445	0.314467	0.543912	0.214608	0.534836
BTSC_BT127_L_CTCATTAAGGCAATTA	-2.71655	10.9793	BT127_L	BT127	GSC	0.401772	0.308489	0.445232	0.283026	0.559724
BTSC_BT127_L_CTCATTAAGTGGAGAA	-13.9491	-1.09692	BT127_L	BT127	GSC	0.33112	0.198012	0.442456	0.462863	0.277996
BTSC_BT127_L_CTCATTACATACGCCG	-6.87661	13.4277	BT127_L	BT127	GSC	0.392613	0.242405	0.39635	0.478149	0.400835
BTSC_BT127_L_CTCATTACATCCTAGA	-5.88802	7.25325	BT127_L	BT127	GSC	0.32261	0.261731	0.467271	0.506431	0.370197
BTSC_BT127_L_CTCATTAGTCAAAGCG	-11.3616	22.4479	BT127_L	BT127	GSC	0.417288	0.177299	0.209822	0.57425	0.493939
BTSC_BT127_L_CTCCTAGTCACCAGGC	-4.83811	13.1514	BT127_L	BT127	GSC	0.472744	0.234128	0.453432	0.389825	0.481173
BTSC_BT127_L_CTCGAAATCTTAGAGC	-6.4482	17.2511	BT127_L	BT127	GSC	0.339378	0.195131	0.390773	0.38456	0.327169
BTSC_BT127_L_CTCGAGGCACCATCCT	-8.46499	13.6877	BT127_L	BT127	GSC	0.405493	0.255315	0.289813	0.349189	0.465327
BTSC_BT127_L_CTCGGAGAGTCAAGGC	-14.9704	-6.68386	BT127_L	BT127	GSC	0.278357	0.201245	0.442095	0.388703	0.273993
BTSC_BT127_L_CTCGGAGCAACGATCT	-20.6044	21.199	BT127_L	BT127	GSC	0.447126	0.1812	0.359167	0.514344	0.379129
BTSC_BT127_L_CTCGGAGCAATACGCT	-13.2885	9.99413	BT127_L	BT127	GSC	0.334866	0.249697	0.439516	0.46737	0.417211
BTSC_BT127_L_CTCGGGACACTTAAGC	-5.26412	13.4877	BT127_L	BT127	GSC	0.447451	0.207217	0.313139	0.467525	0.490043
BTSC_BT127_L_CTCGGGATCATCTGTT	-15.252	-8.09414	BT127_L	BT127	GSC	0.310843	0.197471	0.408508	0.370975	0.243249
BTSC_BT127_L_CTCGTACAGTGAAGTT	-17.0684	2.11446	BT127_L	BT127	GSC	0.326055	0.28234	0.471343	0.428951	0.35114
BTSC_BT127_L_CTCGTACAGTGGTAGC	-3.63752	10.4406	BT127_L	BT127	GSC	0.414024	0.273238	0.374692	0.464187	0.472821
BTSC_BT127_L_CTCGTCAAGCTAGGCA	-14.5583	-9.02313	BT127_L	BT127	GSC	0.281338	0.209949	0.456964	0.510533	0.239838
BTSC_BT127_L_CTCGTCAAGTCAAGCG	-8.88308	7.98276	BT127_L	BT127	GSC	0.382612	0.236051	0.404237	0.399368	0.334479
BTSC_BT127_L_CTCGTCACATTAACCG	-10.3687	7.98016	BT127_L	BT127	GSC	0.335364	0.272202	0.401458	0.399423	0.397687
BTSC_BT127_L_CTCGTCAGTATATGGA	-5.59419	18.4405	BT127_L	BT127	GSC	0.46993	0.191416	0.424243	0.4351	0.457427
BTSC_BT127_L_CTCTAATAGCACAGGT	-15.4628	1.65618	BT127_L	BT127	GSC	0.316611	0.181545	0.416336	0.316929	0.272455
BTSC_BT127_L_CTCTAATAGGAATCGC	-14.7954	9.68071	BT127_L	BT127	GSC	0.564261	0.29585	0.415112	0.24563	0.759389
BTSC_BT127_L_CTCTAATCAAACCTAC	-8.02774	13.5449	BT127_L	BT127	GSC	0.387945	0.176835	0.382857	0.616362	0.447192
BTSC_BT127_L_CTCTAATGTTAGAACA	-11.4025	6.9982	BT127_L	BT127	GSC	0.472621	0.29553	0.482136	0.347855	0.633065
BTSC_BT127_L_CTCTAATTCAGGCCCA	-18.2072	-9.3927	BT127_L	BT127	GSC	0.297342	0.190082	0.388505	0.404916	0.315976
BTSC_BT127_L_CTCTAATTCGTCACGG	-14.9015	17.9734	BT127_L	BT127	GSC	0.527565	0.158071	0.365411	0.589945	0.413247
BTSC_BT127_L_CTCTACGGTATTAGCC	-4.49171	19.5269	BT127_L	BT127	GSC	0.437045	0.278473	0.337194	0.539978	0.454747
BTSC_BT127_L_CTCTACGGTCTGCGGT	-14.8858	4.73135	BT127_L	BT127	GSC	0.325271	0.251876	0.47259	0.415667	0.310712
BTSC_BT127_L_CTCTACGTCTCTGAGA	-7.37009	5.25049	BT127_L	BT127	GSC	0.379643	0.421062	0.48771	0.227369	0.546188
BTSC_BT127_L_CTCTACGTCTTTACGT	-5.62059	7.01584	BT127_L	BT127	GSC	0.403127	0.269729	0.450057	0.452618	0.502755
BTSC_BT127_L_CTCTGGTGTACATCCA	-5.69157	13.2726	BT127_L	BT127	GSC	0.418507	0.311835	0.519291	0.333149	0.484245
BTSC_BT127_L_CTCTGGTGTCAGAATA	-18.0928	-11.2439	BT127_L	BT127	GSC	0.320707	0.188292	0.424571	0.422627	0.28664
BTSC_BT127_L_CTCTGGTTCCTCAACC	-7.3151	17.4051	BT127_L	BT127	GSC	0.436925	0.213533	0.370331	0.415336	0.49868
BTSC_BT127_L_CTCTGGTTCTCTGAGA	-15.5845	9.99404	BT127_L	BT127	GSC	0.399623	0.200882	0.449902	0.404817	0.423784
BTSC_BT127_L_CTGAAACCACATGACT	-21.7271	22.1389	BT127_L	BT127	GSC	0.44226	0.182309	0.250432	0.626429	0.515438
BTSC_BT127_L_CTGAAACGTACTCAAC	-15.5984	9.6416	BT127_L	BT127	GSC	0.355989	0.236417	0.441363	0.300222	0.562396
BTSC_BT127_L_CTGAAACTCATGTGGT	-13.2727	4.58529	BT127_L	BT127	GSC	0.352447	0.214364	0.475254	0.448066	0.234687
BTSC_BT127_L_CTGAAACTCTTATCTG	-6.04541	20.3194	BT127_L	BT127	GSC	0.346753	0.275326	0.416474	0.514246	0.45309
BTSC_BT127_L_CTGAAGTAGTCAAGCG	-11.2587	1.00246	BT127_L	BT127	GSC	0.344047	0.34399	0.470446	0.242346	0.509579
BTSC_BT127_L_CTGAAGTCACCCATTC	-14.7001	11.9506	BT127_L	BT127	GSC	0.438743	0.199491	0.384637	0.451871	0.327081
BTSC_BT127_L_CTGAAGTCATCTCGCT	-7.00594	9.21692	BT127_L	BT127	GSC	0.46846	0.318057	0.360017	0.378642	0.551646
BTSC_BT127_L_CTGAAGTCATGCAATC	-8.84995	7.99504	BT127_L	BT127	GSC	0.301126	0.178851	0.557723	0.411859	0.337041
BTSC_BT127_L_CTGATAGAGAAGGTGA	-14.9181	13.416	BT127_L	BT127	GSC	0.567825	0.160939	0.327567	0.339267	0.592055
BTSC_BT127_L_CTGATAGCATACAGCT	-6.25457	10.1342	BT127_L	BT127	GSC	0.398983	0.286332	0.439671	0.356701	0.360829
BTSC_BT127_L_CTGATAGGTGGTCCGT	-16.2403	-13.8846	BT127_L	BT127	GSC	0.288244	0.229842	0.439638	0.362062	0.139712
BTSC_BT127_L_CTGATAGTCGCCATAA	-12.4117	11.1714	BT127_L	BT127	GSC	0.312012	0.242858	0.441034	0.319221	0.252484
BTSC_BT127_L_CTGATAGTCTGCCCTA	-9.71547	6.17702	BT127_L	BT127	GSC	0.411123	0.25809	0.402891	0.365324	0.540254
BTSC_BT127_L_CTGATCCAGGTGATAT	-2.00082	9.74447	BT127_L	BT127	GSC	0.361245	0.319394	0.492254	0.584512	0.327987
BTSC_BT127_L_CTGATCCCAAGTCATC	-2.52015	8.43773	BT127_L	BT127	GSC	0.291052	0.227108	0.433757	0.589623	0.261097
BTSC_BT127_L_CTGATCCGTCAACATC	-13.0768	14.0588	BT127_L	BT127	GSC	0.410086	0.216042	0.360282	0.361133	0.355636
BTSC_BT127_L_CTGATCCGTTGAGGTG	-13.0371	8.69787	BT127_L	BT127	GSC	0.494771	0.289175	0.44129	0.284672	0.398712
BTSC_BT127_L_CTGCCTACACGCATCG	-11.1316	5.51853	BT127_L	BT127	GSC	0.30802	0.25295	0.482119	0.438869	0.337811
BTSC_BT127_L_CTGCCTACAGGGTACA	-12.2972	-5.74759	BT127_L	BT127	GSC	0.262156	0.185716	0.420536	0.567811	0.279007
BTSC_BT127_L_CTGCCTATCATGCTCC	-0.635366	14.5618	BT127_L	BT127	GSC	0.37178	0.247619	0.43904	0.422332	0.508745
BTSC_BT127_L_CTGCCTATCCCATTTA	-12.9452	15.8037	BT127_L	BT127	GSC	0.530666	0.208334	0.312834	0.36794	0.517232
BTSC_BT127_L_CTGCGGACACATTTCT	-18.2832	0.213453	BT127_L	BT127	GSC	0.412093	0.161131	0.431985	0.316055	0.306353
BTSC_BT127_L_CTGCGGATCCAAGTAC	-3.95455	13.9162	BT127_L	BT127	GSC	0.464465	0.249121	0.487373	0.445757	0.421771
BTSC_BT127_L_CTGCGGATCCGAAGAG	-4.71858	10.7154	BT127_L	BT127	GSC	0.405063	0.247756	0.388906	0.463569	0.338977
BTSC_BT127_L_CTGCTGTCACGGACAA	-9.79219	13.8358	BT127_L	BT127	GSC	0.36034	0.276284	0.415716	0.302176	0.497898
BTSC_BT127_L_CTGCTGTGTATCACCA	-7.93186	0.683301	BT127_L	BT127	GSC	0.31416	0.403741	0.48166	0.402267	0.501009
BTSC_BT127_L_CTGCTGTGTTCACGGC	-14.5157	3.92805	BT127_L	BT127	GSC	0.439171	0.250958	0.537	0.412877	0.554874
BTSC_BT127_L_CTGCTGTTCGCAAGCC	-8.47146	8.0183	BT127_L	BT127	GSC	0.449214	0.312511	0.343292	0.350912	0.285169
BTSC_BT127_L_CTGCTGTTCTTGAGGT	-2.88408	17.4962	BT127_L	BT127	GSC	0.459455	0.247622	0.497823	0.40879	0.362391
BTSC_BT127_L_CTGGTCTAGTGAAGTT	-6.83595	18.9148	BT127_L	BT127	GSC	0.433011	0.223765	0.289557	0.495853	0.495277
BTSC_BT127_L_CTGGTCTAGTTACCCA	-11.87	9.65246	BT127_L	BT127	GSC	0.467384	0.263526	0.379156	0.446575	0.445519
BTSC_BT127_L_CTGGTCTCAGGACCCT	-14.9402	7.44811	BT127_L	BT127	GSC	0.390399	0.237151	0.462464	0.357768	0.350604
BTSC_BT127_L_CTGGTCTTCCGCGTTT	-10.2408	6.45429	BT127_L	BT127	GSC	0.333513	0.189309	0.442178	0.539243	0.276304
BTSC_BT127_L_CTGTGCTGTGAGCGAT	-1.64245	3.6928	BT127_L	BT127	GSC	0.333025	0.412043	0.564634	0.389155	0.344114
BTSC_BT127_L_CTGTGCTGTGTGAAAT	-16.792	-12.6413	BT127_L	BT127	GSC	0.310661	0.218081	0.543061	0.415344	0.349985
BTSC_BT127_L_CTGTGCTTCCCTGACT	-16.3272	0.754438	BT127_L	BT127	GSC	0.355323	0.207025	0.424932	0.52294	0.31969
BTSC_BT127_L_CTGTTTAAGAACTGTA	-8.45113	18.5501	BT127_L	BT127	GSC	0.427776	0.261467	0.43249	0.407147	0.390704
BTSC_BT127_L_CTGTTTAAGTAGCGGT	-6.55732	11.2704	BT127_L	BT127	GSC	0.354537	0.303514	0.41312	0.687886	0.417342
BTSC_BT127_L_CTGTTTACAGGAATGC	-10.568	3.01773	BT127_L	BT127	GSC	0.25832	0.253389	0.386139	0.500049	0.222879
BTSC_BT127_L_CTGTTTACATGCGCAC	-5.08408	5.57555	BT127_L	BT127	GSC	0.401493	0.3309	0.466886	0.355726	0.524693
BTSC_BT127_L_CTGTTTAGTAAATGAC	-11.7487	8.33059	BT127_L	BT127	GSC	0.33937	0.278625	0.458184	0.44348	0.421886
BTSC_BT127_L_CTGTTTAGTTGGACCC	-6.41118	10.9387	BT127_L	BT127	GSC	0.339433	0.253078	0.399137	0.47671	0.456065
BTSC_BT127_L_CTTAACTAGTTGAGAT	-12.4636	3.76105	BT127_L	BT127	GSC	0.351992	0.171145	0.386026	0.296072	0.317911
BTSC_BT127_L_CTTAACTCAAACGTGG	-14.8817	2.33789	BT127_L	BT127	GSC	0.300916	0.266422	0.528758	0.423843	0.298865
BTSC_BT127_L_CTTAACTCAAGGTTTC	-21.4538	8.87482	BT127_L	BT127	GSC	0.339706	0.189908	0.42046	0.309558	0.405738
BTSC_BT127_L_CTTAACTCATCCGTGG	-16.9169	5.74647	BT127_L	BT127	GSC	0.3165	0.23248	0.537176	0.316456	0.220138
BTSC_BT127_L_CTTAACTGTGTGACCC	-3.98895	8.74192	BT127_L	BT127	GSC	0.396991	0.322371	0.498737	0.370453	0.355718
BTSC_BT127_L_CTTACCGAGGTAGCTG	-5.35394	14.1952	BT127_L	BT127	GSC	0.428164	0.196094	0.434707	0.56941	0.290954
BTSC_BT127_L_CTTACCGGTGACCAAG	-6.19666	9.90993	BT127_L	BT127	GSC	0.427734	0.257847	0.397233	0.257501	0.473683
BTSC_BT127_L_CTTAGGAAGAGCCCAA	-8.34488	7.33002	BT127_L	BT127	GSC	0.388995	0.239451	0.478987	0.430209	0.34024
BTSC_BT127_L_CTTAGGAGTAAGGATT	-8.17819	14.1556	BT127_L	BT127	GSC	0.396304	0.177442	0.317695	0.594569	0.365714
BTSC_BT127_L_CTTCTCTGTCTCGTTC	-15.4196	11.0493	BT127_L	BT127	GSC	0.37661	0.248732	0.443159	0.383458	0.471074
BTSC_BT127_L_CTTGGCTAGCCACGTC	-17.8688	-10.5023	BT127_L	BT127	GSC	0.320672	0.150658	0.404517	0.450389	0.393002
BTSC_BT127_L_CTTGGCTCACGTGAGA	-7.57624	15.9261	BT127_L	BT127	GSC	0.350135	0.179794	0.419957	0.422162	0.218879
BTSC_BT127_L_CTTGGCTGTTCATGGT	-13.0688	10.8374	BT127_L	BT127	GSC	0.439264	0.245511	0.461019	0.363107	0.392242
BTSC_BT127_L_CTTGGCTTCTAACTGG	-0.00853924	8.74873	BT127_L	BT127	GSC	0.390847	0.309765	0.495511	0.26493	0.340751
BTSC_BT127_L_CTTTGCGAGAGCAATT	-21.1154	-6.23413	BT127_L	BT127	GSC	0.352344	0.159776	0.393775	0.440709	0.235087
BTSC_BT127_L_CTTTGCGAGGGATACC	-3.25167	11.9894	BT127_L	BT127	GSC	0.413045	0.23241	0.374538	0.461686	0.469199
BTSC_BT127_L_CTTTGCGTCCCTAATT	-19.2229	12.5147	BT127_L	BT127	GSC	0.360007	0.188956	0.438007	0.588417	0.446937
BTSC_BT127_L_GAAACTCAGTACATGA	-7.76529	-0.995668	BT127_L	BT127	GSC	0.431624	0.371542	0.546719	0.26968	0.579267
BTSC_BT127_L_GAAACTCGTTCACCTC	2.77524	16.4325	BT127_L	BT127	GSC	0.38371	0.261165	0.359088	0.51619	0.247225
BTSC_BT127_L_GAAACTCTCATCTGCC	-8.81832	15.0938	BT127_L	BT127	GSC	0.31331	0.246833	0.428011	0.403582	0.441499
BTSC_BT127_L_GAAACTCTCCGTAGGC	-15.0428	14.1727	BT127_L	BT127	GSC	0.490026	0.268096	0.253646	0.510322	0.553925
BTSC_BT127_L_GAAATGAAGCCGTCGT	-9.95594	11.7907	BT127_L	BT127	GSC	0.367595	0.236531	0.444698	0.316332	0.499714
BTSC_BT127_L_GAAATGACACGAGGTA	-19.7934	-6.25756	BT127_L	BT127	GSC	0.310727	0.193304	0.444101	0.499264	0.236228
BTSC_BT127_L_GAAATGATCAAGGCTT	-5.3981	9.25837	BT127_L	BT127	GSC	0.420456	0.211492	0.489248	0.465479	0.365675
BTSC_BT127_L_GAACATCCAAGCCGCT	-1.19383	12.8741	BT127_L	BT127	GSC	0.41029	0.283042	0.366714	0.418676	0.230145
BTSC_BT127_L_GAACATCGTAGCTAAA	0.849911	11.4621	BT127_L	BT127	GSC	0.395921	0.300382	0.473129	0.260081	0.528937
BTSC_BT127_L_GAACATCTCGTCACGG	-6.60598	-8.78723	BT127_L	BT127	GSC	0.275799	0.210753	0.439968	0.34628	0.249824
BTSC_BT127_L_GAACCTAGTGCCTGCA	-11.0289	0.890241	BT127_L	BT127	GSC	0.281849	0.23001	0.526781	0.429861	0.306936
BTSC_BT127_L_GAACCTATCGAGCCCA	-11.335	8.29751	BT127_L	BT127	GSC	0.335277	0.245977	0.397938	0.515252	0.414941
BTSC_BT127_L_GAACGGAAGACCGGAT	-11.9705	8.66932	BT127_L	BT127	GSC	0.344387	0.191207	0.451222	0.420607	0.224902
BTSC_BT127_L_GAACGGAAGCTGCCCA	-3.00308	5.75098	BT127_L	BT127	GSC	0.341309	0.261974	0.409698	0.303626	0.255521
BTSC_BT127_L_GAACGGACAACTGGCC	-17.3357	2.02335	BT127_L	BT127	GSC	0.332189	0.206653	0.520796	0.511067	0.22157
BTSC_BT127_L_GAACGGACACTTACGA	-13.1424	8.61582	BT127_L	BT127	GSC	0.35269	0.169878	0.426723	0.382109	0.264475
BTSC_BT127_L_GAACGGAGTTGCTCCT	-5.02992	11.9	BT127_L	BT127	GSC	0.395773	0.304309	0.364383	0.315386	0.268091
BTSC_BT127_L_GAAGCAGAGATATACG	-5.35283	13.4041	BT127_L	BT127	GSC	0.559451	0.243227	0.386901	0.365422	0.591995
BTSC_BT127_L_GAAGCAGAGCTGCCCA	-15.8438	-5.31895	BT127_L	BT127	GSC	0.272819	0.209914	0.432695	0.408239	0.158943
BTSC_BT127_L_GAAGCAGTCTCTGTCG	-0.770522	8.69245	BT127_L	BT127	GSC	0.313378	0.332131	0.422394	0.419081	0.361047
BTSC_BT127_L_GAATAAGCACCTTGTC	-14.1392	6.09945	BT127_L	BT127	GSC	0.409843	0.244877	0.451286	0.37542	0.473298
BTSC_BT127_L_GAATAAGGTACATCCA	-4.63059	7.11216	BT127_L	BT127	GSC	0.398542	0.284419	0.444705	0.366303	0.571384
BTSC_BT127_L_GAATAAGGTATGGTTC	-20.265	7.7518	BT127_L	BT127	GSC	0.398217	0.208839	0.394572	0.490614	0.584899
BTSC_BT127_L_GACACGCAGCTAACAA	-7.70719	13.2485	BT127_L	BT127	GSC	0.352082	0.229328	0.33068	0.534007	0.551006
BTSC_BT127_L_GACACGCCAAGCCTAT	-5.39095	14.5403	BT127_L	BT127	GSC	0.493788	0.203959	0.381128	0.580455	0.53137
BTSC_BT127_L_GACACGCTCCAAACTG	-17.4096	-3.76735	BT127_L	BT127	GSC	0.30564	0.192858	0.4088	0.386935	0.347355
BTSC_BT127_L_GACACGCTCTTGTATC	-4.9871	14.992	BT127_L	BT127	GSC	0.439511	0.218894	0.310947	0.557095	0.551793
BTSC_BT127_L_GACAGAGAGTCTCCTC	-8.2889	12.3896	BT127_L	BT127	GSC	0.442554	0.241972	0.422557	0.410431	0.406515
BTSC_BT127_L_GACCAATGTAAGCACG	-20.2721	7.33688	BT127_L	BT127	GSC	0.406349	0.200128	0.433457	0.512911	0.339496
BTSC_BT127_L_GACCAATGTCATGCCG	-1.98951	17.1575	BT127_L	BT127	GSC	0.390698	0.24169	0.448066	0.327841	0.663491
BTSC_BT127_L_GACCAATTCCACGCAG	-14.7923	3.60118	BT127_L	BT127	GSC	0.327775	0.152042	0.398948	0.374934	0.322122
BTSC_BT127_L_GACCTGGCAGCATACT	-11.311	5.6653	BT127_L	BT127	GSC	0.414177	0.311309	0.453338	0.411065	0.467219
BTSC_BT127_L_GACCTGGGTTAAGACA	-4.81395	10.1933	BT127_L	BT127	GSC	0.398872	0.305232	0.343073	0.639223	0.495024
BTSC_BT127_L_GACGCGTAGAAGGACA	-14.9333	11.6144	BT127_L	BT127	GSC	0.373897	0.254412	0.497191	0.417516	0.608999
BTSC_BT127_L_GACGCGTCACGAAACG	-9.62491	18.0396	BT127_L	BT127	GSC	0.474259	0.227101	0.343404	0.405139	0.561122
BTSC_BT127_L_GACGCGTGTACGACCC	-12.2285	11.0489	BT127_L	BT127	GSC	0.463811	0.190884	0.351383	0.533447	0.482459
BTSC_BT127_L_GACGCGTTCCACGCAG	-18.141	1.22797	BT127_L	BT127	GSC	0.334533	0.252939	0.464165	0.339969	0.214228
BTSC_BT127_L_GACGGCTAGGCAGTCA	-13.8363	6.11202	BT127_L	BT127	GSC	0.29071	0.242393	0.458762	0.446514	0.329181
BTSC_BT127_L_GACGTGCAGATATACG	-8.80586	8.69386	BT127_L	BT127	GSC	0.419151	0.230181	0.484771	0.465727	0.603457
BTSC_BT127_L_GACGTGCCAAGTCATC	-17.0903	-0.897747	BT127_L	BT127	GSC	0.345685	0.14025	0.392845	0.408591	0.331795
BTSC_BT127_L_GACGTGCCACCATGTA	-11.5312	7.42288	BT127_L	BT127	GSC	0.541893	0.314265	0.38989	0.258463	0.626672
BTSC_BT127_L_GACGTGCCAGCGTAAG	-12.9721	18.63	BT127_L	BT127	GSC	0.5104	0.247982	0.362556	0.527477	0.489883
BTSC_BT127_L_GACGTTAAGGCTAGCA	-8.86949	5.94924	BT127_L	BT127	GSC	0.340552	0.1959	0.41614	0.477609	0.315958
BTSC_BT127_L_GACGTTACATCGACGC	-8.82233	12.4388	BT127_L	BT127	GSC	0.43839	0.212441	0.478182	0.311413	0.434537
BTSC_BT127_L_GACGTTAGTACCCAAT	-3.36839	17.5405	BT127_L	BT127	GSC	0.401886	0.18143	0.352472	0.419746	0.340801
BTSC_BT127_L_GACGTTAGTCCGACGT	-9.76176	2.77775	BT127_L	BT127	GSC	0.322157	0.181294	0.537854	0.325704	0.222012
BTSC_BT127_L_GACGTTAGTTGTCTTT	-14.4115	1.37988	BT127_L	BT127	GSC	0.280091	0.244913	0.428761	0.427076	0.301914
BTSC_BT127_L_GACGTTATCGTGTAGT	-10.9392	13.1573	BT127_L	BT127	GSC	0.358849	0.216354	0.310932	0.518299	0.468149
BTSC_BT127_L_GACTAACCAATGACCT	-13.4654	8.57396	BT127_L	BT127	GSC	0.328073	0.212113	0.39996	0.337244	0.30323
BTSC_BT127_L_GACTAACCATCACGTA	-4.99094	9.97091	BT127_L	BT127	GSC	0.406222	0.281002	0.428755	0.367153	0.509257
BTSC_BT127_L_GACTAACTCGTCACGG	-14.5437	11.5129	BT127_L	BT127	GSC	0.460311	0.206055	0.347276	0.446676	0.539956
BTSC_BT127_L_GACTACAAGGCCATAG	-12.1874	6.97186	BT127_L	BT127	GSC	0.31402	0.268772	0.44797	0.447269	0.312119
BTSC_BT127_L_GACTACAGTTCGCTAA	-1.7199	12.3429	BT127_L	BT127	GSC	0.358626	0.283142	0.474477	0.440534	0.363333
BTSC_BT127_L_GACTGCGTCATGCAAC	-13.5364	3.0881	BT127_L	BT127	GSC	0.48428	0.301812	0.430862	0.221531	0.603514
BTSC_BT127_L_GACTGCGTCTTGTATC	-8.32703	6.69771	BT127_L	BT127	GSC	0.33506	0.187643	0.407132	0.532193	0.373249
BTSC_BT127_L_GAGCAGAAGGTGGGTT	-11.5754	-1.79893	BT127_L	BT127	GSC	0.338465	0.16464	0.401831	0.42101	0.139344
BTSC_BT127_L_GAGCAGAGTCTTGATG	-5.24754	21.2898	BT127_L	BT127	GSC	0.438291	0.226735	0.477349	0.410736	0.439414
BTSC_BT127_L_GAGGTGACAGTATGCT	-18.7771	-4.20856	BT127_L	BT127	GSC	0.335316	0.189213	0.436583	0.402304	0.16133
BTSC_BT127_L_GAGGTGACATACCATG	-7.70466	7.8747	BT127_L	BT127	GSC	0.425986	0.282983	0.40688	0.407672	0.591065
BTSC_BT127_L_GAGTCCGAGGACCACA	-7.11696	8.65559	BT127_L	BT127	GSC	0.442565	0.220915	0.491506	0.278971	0.324747
BTSC_BT127_L_GAGTCCGGTCATATGC	-1.82896	10.4086	BT127_L	BT127	GSC	0.41616	0.236579	0.422965	0.47747	0.496676
BTSC_BT127_L_GAGTCCGGTGGTGTAG	-0.935003	6.79411	BT127_L	BT127	GSC	0.340262	0.377951	0.569468	0.389055	0.519946
BTSC_BT127_L_GAGTCCGGTGTTTGGT	-10.6057	8.30195	BT127_L	BT127	GSC	0.458972	0.331121	0.4154	0.357345	0.578687
BTSC_BT127_L_GATCAGTAGAGTACCG	-13.0364	12.462	BT127_L	BT127	GSC	0.495403	0.264705	0.388687	0.505899	0.601131
BTSC_BT127_L_GATCAGTCAAAGGTGC	-13.641	8.09047	BT127_L	BT127	GSC	0.355398	0.181481	0.404237	0.342196	0.375682
BTSC_BT127_L_GATCAGTGTATGAAAC	-8.89976	13.8855	BT127_L	BT127	GSC	0.341094	0.170048	0.420976	0.346691	0.501887
BTSC_BT127_L_GATCAGTGTCCAGTAT	-8.73893	14.7281	BT127_L	BT127	GSC	0.333183	0.243119	0.422855	0.461641	0.286206
BTSC_BT127_L_GATCAGTGTCCGAACC	-11.4235	16.9276	BT127_L	BT127	GSC	0.339837	0.222393	0.443756	0.45294	0.39307
BTSC_BT127_L_GATCAGTGTTCAACCA	-11.727	10.7751	BT127_L	BT127	GSC	0.345705	0.196447	0.445143	0.333391	0.436037
BTSC_BT127_L_GATCGATAGGGTTCCC	0.761868	14.7777	BT127_L	BT127	GSC	0.510936	0.263196	0.46107	0.428139	0.642474
BTSC_BT127_L_GATCGATCATGCCTTC	-19.0719	7.63404	BT127_L	BT127	GSC	0.361609	0.210378	0.444252	0.461395	0.28434
BTSC_BT127_L_GATCGATGTTGGACCC	-9.98571	7.73976	BT127_L	BT127	GSC	0.352531	0.271007	0.409253	0.424104	0.460722
BTSC_BT127_L_GATCGCGCATAGAAAC	-11.3794	10.5128	BT127_L	BT127	GSC	0.395212	0.234799	0.415954	0.388041	0.435973
BTSC_BT127_L_GATCGTAGTAAATACG	-1.92033	13.961	BT127_L	BT127	GSC	0.394005	0.199811	0.473835	0.2357	0.383939
BTSC_BT127_L_GATCTAGAGACAGGCT	-10.4254	8.86024	BT127_L	BT127	GSC	0.374304	0.218145	0.443785	0.279436	0.400558
BTSC_BT127_L_GATCTAGGTCGCCATG	-5.80061	12.3894	BT127_L	BT127	GSC	0.409333	0.175419	0.415508	0.514033	0.432797
BTSC_BT127_L_GATGAAAAGACGCTTT	-2.39207	13.5802	BT127_L	BT127	GSC	0.305104	0.279381	0.39456	0.5512	0.401588
BTSC_BT127_L_GATGAAAAGAGACTAT	-7.87025	11.1216	BT127_L	BT127	GSC	0.386198	0.256485	0.404463	0.35643	0.490409
BTSC_BT127_L_GATGAAAAGGGCATGT	-7.50801	14.062	BT127_L	BT127	GSC	0.49945	0.24961	0.391733	0.424721	0.364561
BTSC_BT127_L_GATGAAATCCATGAGT	-9.26753	18.9482	BT127_L	BT127	GSC	0.386018	0.256517	0.464824	0.29115	0.626521
BTSC_BT127_L_GATGAGGCACATGACT	-7.62439	12.2126	BT127_L	BT127	GSC	0.424863	0.254287	0.354095	0.635004	0.331072
BTSC_BT127_L_GATGAGGCACCTGGTG	-7.03913	5.77297	BT127_L	BT127	GSC	0.323477	0.210892	0.370439	0.385933	0.360933
BTSC_BT127_L_GATGAGGGTAAGTTCC	-13.7076	14.9076	BT127_L	BT127	GSC	0.390851	0.221271	0.387161	0.447916	0.628336
BTSC_BT127_L_GATGAGGTCTAAGCCA	-16.1493	13.1962	BT127_L	BT127	GSC	0.389601	0.176864	0.373477	0.497773	0.473789
BTSC_BT127_L_GATGAGGTCTTACCGC	-13.0082	2.51959	BT127_L	BT127	GSC	0.291412	0.211347	0.448664	0.468433	0.25414
BTSC_BT127_L_GATGCTAAGGCTATCT	-9.36739	10.9172	BT127_L	BT127	GSC	0.413184	0.200543	0.412106	0.498353	0.262497
BTSC_BT127_L_GATGCTACATAGACTC	-7.96138	8.72331	BT127_L	BT127	GSC	0.438309	0.335482	0.497689	0.295741	0.67979
BTSC_BT127_L_GATGCTAGTATCGCAT	-12.3973	4.69278	BT127_L	BT127	GSC	0.378408	0.303906	0.446384	0.358339	0.322827
BTSC_BT127_L_GATGCTAGTCGACTAT	-17.9343	-0.34126	BT127_L	BT127	GSC	0.484079	0.417153	0.504199	0.275715	0.558973
BTSC_BT127_L_GATGCTATCATGTAGC	-5.31281	-5.84965	BT127_L	BT127	GSC	0.239627	0.247207	0.440867	0.368723	0.183649
BTSC_BT127_L_GATGCTATCATGTCTT	-20.4821	-7.63299	BT127_L	BT127	GSC	0.320492	0.189341	0.481706	0.481061	0.182984
BTSC_BT127_L_GATGCTATCGGTGTTA	6.62672	9.48391	BT127_L	BT127	GSC	0.346624	0.330199	0.441387	0.250601	0.446901
BTSC_BT127_L_GATTCAGAGTATCGAA	-10.4852	-1.14003	BT127_L	BT127	GSC	0.300916	0.176683	0.434237	0.360751	0.139202
BTSC_BT127_L_GATTCAGAGTCCATAC	-14.2063	-13.7027	BT127_L	BT127	GSC	0.278847	0.220069	0.477483	0.354129	0.244349
BTSC_BT127_L_GATTCAGGTTCGCGAC	-17.6842	9.07035	BT127_L	BT127	GSC	0.386956	0.252209	0.432512	0.3968	0.570347
BTSC_BT127_L_GATTCAGGTTCGGGCT	4.32132	13.2262	BT127_L	BT127	GSC	0.391627	0.281378	0.454083	0.356154	0.540443
BTSC_BT127_L_GATTCAGTCAGATAAG	-11.5387	7.61654	BT127_L	BT127	GSC	0.323506	0.249336	0.364047	0.364587	0.324658
BTSC_BT127_L_GCAAACTAGTGGTAGC	-13.8479	-2.45461	BT127_L	BT127	GSC	0.313135	0.21934	0.456036	0.418298	0.364557
BTSC_BT127_L_GCAAACTCACAGTCGC	0.0676157	23.4388	BT127_L	BT127	GSC	0.466693	0.238507	0.441401	0.414707	0.385749
BTSC_BT127_L_GCAAACTCAGAGTGTG	-2.47298	17.1508	BT127_L	BT127	GSC	0.455886	0.175246	0.452954	0.502667	0.429654
BTSC_BT127_L_GCAAACTGTAGGACAC	-14.908	14.5764	BT127_L	BT127	GSC	0.359599	0.274555	0.474429	0.50247	0.317158
BTSC_BT127_L_GCAAACTGTGGTGTAG	-9.52022	10.8445	BT127_L	BT127	GSC	0.434549	0.229284	0.368965	0.24896	0.408976
BTSC_BT127_L_GCAAACTTCAGTACGT	-10.6249	12.2768	BT127_L	BT127	GSC	0.360072	0.264203	0.410449	0.343082	0.381645
BTSC_BT127_L_GCAATCAAGCCAGTTT	-14.5569	-11.5188	BT127_L	BT127	GSC	0.289186	0.200327	0.480132	0.412994	0.225061
BTSC_BT127_L_GCAATCACACAGGAGT	-15.4796	4.89929	BT127_L	BT127	GSC	0.329544	0.200346	0.510073	0.449587	0.304949
BTSC_BT127_L_GCAATCAGTTCAACCA	-12.2425	3.98926	BT127_L	BT127	GSC	0.31088	0.234575	0.418421	0.42349	0.32614
BTSC_BT127_L_GCACATACACCTCGGA	-13.4106	5.64609	BT127_L	BT127	GSC	0.292197	0.212371	0.400637	0.430695	0.180846
BTSC_BT127_L_GCACATACATCCGTGG	-1.88196	11.8537	BT127_L	BT127	GSC	0.391287	0.231919	0.348511	0.547161	0.433792
BTSC_BT127_L_GCACATAGTACGAAAT	-2.51557	16.678	BT127_L	BT127	GSC	0.479175	0.149551	0.324182	0.405754	0.355408
BTSC_BT127_L_GCACATATCCACTCCA	-7.15665	8.84321	BT127_L	BT127	GSC	0.456519	0.3347	0.497838	0.40359	0.568154
BTSC_BT127_L_GCACTCTAGCTACCGC	-6.11833	8.84154	BT127_L	BT127	GSC	0.469246	0.27519	0.50103	0.238611	0.475613
BTSC_BT127_L_GCACTCTCACAGAGGT	-13.8902	13.8934	BT127_L	BT127	GSC	0.311442	0.283231	0.372374	0.512645	0.454857
BTSC_BT127_L_GCACTCTCACGTTGGC	-11.4255	2.75441	BT127_L	BT127	GSC	0.323844	0.203158	0.462591	0.549367	0.289247
BTSC_BT127_L_GCAGCCAAGAGGTTGC	-11.4171	10.6743	BT127_L	BT127	GSC	0.431251	0.246073	0.374313	0.436413	0.466243
BTSC_BT127_L_GCAGCCAGTCTTCTCG	-4.45025	17.0632	BT127_L	BT127	GSC	0.369935	0.234729	0.460813	0.482993	0.283308
BTSC_BT127_L_GCAGCCATCACAGGCC	-11.7514	7.07449	BT127_L	BT127	GSC	0.314659	0.209888	0.449115	0.364175	0.219796
BTSC_BT127_L_GCAGTTATCAGTTAGC	-3.34021	10.4331	BT127_L	BT127	GSC	0.366459	0.316515	0.421191	0.418559	0.476513
BTSC_BT127_L_GCAGTTATCGAATGGG	-17.0468	11.4394	BT127_L	BT127	GSC	0.388344	0.207364	0.374741	0.467742	0.551289
BTSC_BT127_L_GCATACAAGTCAATAG	-8.0189	11.939	BT127_L	BT127	GSC	0.562315	0.267723	0.437199	0.452927	0.687671
BTSC_BT127_L_GCATACACATTAACCG	-12.9471	8.90123	BT127_L	BT127	GSC	0.416608	0.253813	0.418816	0.282726	0.540951
BTSC_BT127_L_GCATACATCAACACGT	-10.048	8.18608	BT127_L	BT127	GSC	0.320959	0.305221	0.520294	0.377915	0.376257
BTSC_BT127_L_GCATACATCATGTCCC	-9.81067	3.21594	BT127_L	BT127	GSC	0.281998	0.250249	0.49281	0.546397	0.220053
BTSC_BT127_L_GCATACATCCACTGGG	-9.93817	3.02684	BT127_L	BT127	GSC	0.417996	0.434346	0.494286	0.360488	0.604658
BTSC_BT127_L_GCATGATGTATTCGTG	-2.68059	16.3098	BT127_L	BT127	GSC	0.529941	0.203322	0.301198	0.309474	0.517966
BTSC_BT127_L_GCATGCGAGTACCGGA	-13.5597	-0.954503	BT127_L	BT127	GSC	0.328868	0.252855	0.435285	0.31787	0.167696
BTSC_BT127_L_GCATGCGGTTTGGGCC	-15.9104	9.52305	BT127_L	BT127	GSC	0.586183	0.19661	0.440477	0.268886	0.623548
BTSC_BT127_L_GCATGTAAGAGCCCAA	-10.4222	8.47639	BT127_L	BT127	GSC	0.318783	0.217421	0.464878	0.424703	0.385128
BTSC_BT127_L_GCATGTATCAGAGGTG	-10.434	6.62225	BT127_L	BT127	GSC	0.310777	0.231194	0.410662	0.368808	0.242925
BTSC_BT127_L_GCATGTATCATCGATG	-19.7938	-0.0960122	BT127_L	BT127	GSC	0.317447	0.205178	0.397061	0.422974	0.190183
BTSC_BT127_L_GCATGTATCCTTAATC	-18.2207	12.0022	BT127_L	BT127	GSC	0.44466	0.181877	0.365275	0.293069	0.253556
BTSC_BT127_L_GCCAAATCAGGAACGT	-18.6561	15.207	BT127_L	BT127	GSC	0.385647	0.226486	0.458669	0.48878	0.379518
BTSC_BT127_L_GCCAAATGTCGGGTCT	-15.5646	5.212	BT127_L	BT127	GSC	0.321512	0.229069	0.426022	0.380524	0.412694
BTSC_BT127_L_GCCAAATGTGTTTGTG	-11.6956	8.39803	BT127_L	BT127	GSC	0.471919	0.265492	0.321893	0.208675	0.633097
BTSC_BT127_L_GCCAAATTCACGATGT	2.34946	20.9908	BT127_L	BT127	GSC	0.455879	0.179457	0.314229	0.610645	0.372358
BTSC_BT127_L_GCCTCTAAGCTAAACA	-7.99272	12.0671	BT127_L	BT127	GSC	0.463133	0.316004	0.45633	0.317554	0.540354
BTSC_BT127_L_GCCTCTACACGCTTTC	-4.21977	13.5439	BT127_L	BT127	GSC	0.358398	0.180654	0.363248	0.382225	0.272529
BTSC_BT127_L_GCCTCTACAGGACCCT	-11.3396	1.46864	BT127_L	BT127	GSC	0.34439	0.16784	0.431709	0.583542	0.226124
BTSC_BT127_L_GCCTCTACAGGCTCAC	-14.4915	9.9297	BT127_L	BT127	GSC	0.380801	0.178116	0.443742	0.541128	0.407775
BTSC_BT127_L_GCCTCTAGTCGCTTCT	-15.1043	14.2459	BT127_L	BT127	GSC	0.394261	0.238614	0.382442	0.544586	0.374082
BTSC_BT127_L_GCCTCTATCTAAGCCA	-9.6281	14.376	BT127_L	BT127	GSC	0.435142	0.167724	0.392448	0.268988	0.531058
BTSC_BT127_L_GCGACCATCGCTTAGA	-22.2317	5.23905	BT127_L	BT127	GSC	0.380497	0.175133	0.437387	0.361741	0.326288
BTSC_BT127_L_GCGACCATCTACTTAC	-5.65858	9.37024	BT127_L	BT127	GSC	0.39191	0.249114	0.511426	0.472128	0.445337
BTSC_BT127_L_GCGAGAAAGAGTGAGA	-11.7367	11.1975	BT127_L	BT127	GSC	0.446144	0.249215	0.344281	0.398353	0.59128
BTSC_BT127_L_GCGAGAACACCCTATC	-10.3478	8.1093	BT127_L	BT127	GSC	0.443497	0.352799	0.542958	0.193692	0.503711
BTSC_BT127_L_GCGAGAAGTTCGCGAC	-1.67787	13.5966	BT127_L	BT127	GSC	0.419528	0.273126	0.398238	0.44907	0.640612
BTSC_BT127_L_GCGAGAATCAAACCGT	-17.7204	-8.88032	BT127_L	BT127	GSC	0.30414	0.198848	0.437731	0.354814	0.314815
BTSC_BT127_L_GCGCAACAGTCGTTTG	-16.7858	6.01009	BT127_L	BT127	GSC	0.349507	0.242302	0.441242	0.457817	0.470879
BTSC_BT127_L_GCGCAACGTTGAGTTC	-7.08481	11.5287	BT127_L	BT127	GSC	0.446964	0.201185	0.528989	0.560191	0.505888
BTSC_BT127_L_GCGCAACTCTGACCTC	-19.7774	-9.11408	BT127_L	BT127	GSC	0.343477	0.201882	0.413868	0.304062	0.423141
BTSC_BT127_L_GCGCAGTGTACTCTCC	-5.49868	7.96058	BT127_L	BT127	GSC	0.375653	0.228568	0.391406	0.50159	0.323237
BTSC_BT127_L_GCGCAGTGTTATCGGT	-13.7365	-10.1799	BT127_L	BT127	GSC	0.265739	0.25468	0.535783	0.350098	0.262212
BTSC_BT127_L_GCGCCAAAGACTGGGT	0.419782	4.46489	BT127_L	BT127	GSC	0.358251	0.370806	0.464278	0.359717	0.434226
BTSC_BT127_L_GCGCCAAAGTACGATA	-1.51047	5.62973	BT127_L	BT127	GSC	0.362748	0.370116	0.418227	0.471403	0.398299
BTSC_BT127_L_GCGCCAAAGTCCATAC	-19.9477	-9.79468	BT127_L	BT127	GSC	0.301506	0.192877	0.421604	0.356572	0.332806
BTSC_BT127_L_GCGCCAACAGCTGCTG	-9.4651	9.31635	BT127_L	BT127	GSC	0.492863	0.280324	0.395917	0.303445	0.472814
BTSC_BT127_L_GCGCCAATCTTGCATT	-16.5432	13.8087	BT127_L	BT127	GSC	0.295189	0.263147	0.403846	0.397998	0.240851
BTSC_BT127_L_GCGCGATCATCTACGA	-3.45986	13.9545	BT127_L	BT127	GSC	0.481469	0.279409	0.355099	0.427452	0.413716
BTSC_BT127_L_GCGGGTTCACGGATAG	-9.21353	12.6989	BT127_L	BT127	GSC	0.509675	0.291906	0.404306	0.291456	0.505398
BTSC_BT127_L_GCGGGTTTCTAACCGA	-11.9494	10.4202	BT127_L	BT127	GSC	0.334488	0.23011	0.393779	0.350608	0.367317
BTSC_BT127_L_GCGGGTTTCTGCCCTA	-16.0039	3.2831	BT127_L	BT127	GSC	0.342592	0.224339	0.479959	0.47739	0.386626
BTSC_BT127_L_GCTCCTATCTGTGCAA	-18.1279	1.82385	BT127_L	BT127	GSC	0.330053	0.223102	0.520119	0.339669	0.340702
BTSC_BT127_L_GCTCTGTGTCTCATCC	-13.7662	7.84999	BT127_L	BT127	GSC	0.468395	0.255662	0.395564	0.22921	0.613134
BTSC_BT127_L_GCTCTGTGTGCTAGCC	-14.1922	15.8015	BT127_L	BT127	GSC	0.389896	0.426465	0.575689	0.458524	0.546283
BTSC_BT127_L_GCTCTGTTCAACTCTT	-18.5489	0.993023	BT127_L	BT127	GSC	0.378955	0.198991	0.454914	0.453368	0.303706
BTSC_BT127_L_GCTCTGTTCAGCTGGC	-20.5034	6.03269	BT127_L	BT127	GSC	0.317181	0.268439	0.44423	0.328552	0.420554
BTSC_BT127_L_GCTCTGTTCGCTAGCG	7.20614	13.447	BT127_L	BT127	GSC	0.369535	0.354238	0.463099	0.415893	0.55796
BTSC_BT127_L_GCTCTGTTCTTGCCGT	-11.3808	7.14095	BT127_L	BT127	GSC	0.335372	0.254984	0.426096	0.280431	0.282339
BTSC_BT127_L_GCTGCAGCATATGAGA	-4.76588	9.93957	BT127_L	BT127	GSC	0.340948	0.347253	0.386818	0.495478	0.508991
BTSC_BT127_L_GCTGCGAAGGACAGAA	5.24338	11.989	BT127_L	BT127	GSC	0.388164	0.369478	0.445858	0.461628	0.629021
BTSC_BT127_L_GCTGCGACACCTCGTT	-6.20605	17.466	BT127_L	BT127	GSC	0.644364	0.249944	0.437228	0.362837	0.643156
BTSC_BT127_L_GCTGCGATCGCAGGCT	-13.3292	-5.22378	BT127_L	BT127	GSC	0.288692	0.216341	0.406405	0.423043	0.249546
BTSC_BT127_L_GCTGCTTTCAAACCGT	-13.8291	16.4957	BT127_L	BT127	GSC	0.391399	0.185446	0.41278	0.360139	0.465914
BTSC_BT127_L_GCTGGGTAGACGACGT	-16.4357	10.3766	BT127_L	BT127	GSC	0.340976	0.261221	0.450526	0.535227	0.479392
BTSC_BT127_L_GCTGGGTCAGACGCTC	-13.4377	12.5496	BT127_L	BT127	GSC	0.459638	0.171238	0.386272	0.38868	0.338059
BTSC_BT127_L_GCTGGGTTCTTCGGTC	-16.3662	13.077	BT127_L	BT127	GSC	0.511462	0.192387	0.327458	0.283112	0.529971
BTSC_BT127_L_GCTTCCACAGGAATCG	-6.64745	11.6998	BT127_L	BT127	GSC	0.447169	0.11761	0.314947	0.587628	0.289998
BTSC_BT127_L_GCTTCCAGTCTAAACC	-12.5398	8.76893	BT127_L	BT127	GSC	0.447042	0.283531	0.502293	0.402676	0.587294
BTSC_BT127_L_GCTTGAATCAACGGGA	-5.163	7.22548	BT127_L	BT127	GSC	0.405167	0.358	0.467354	0.388723	0.502979
BTSC_BT127_L_GCTTGAATCAACTCTT	-12.3842	8.16435	BT127_L	BT127	GSC	0.329305	0.21186	0.464568	0.393673	0.628194
BTSC_BT127_L_GGAAAGCAGGATGCGT	-11.4752	11.7401	BT127_L	BT127	GSC	0.353442	0.209342	0.441371	0.492389	0.449189
BTSC_BT127_L_GGAAAGCTCAGCATGT	-9.51734	12.1575	BT127_L	BT127	GSC	0.414534	0.246596	0.419327	0.580468	0.494106
BTSC_BT127_L_GGAACTTAGGACACCA	-13.2554	7.1274	BT127_L	BT127	GSC	0.359685	0.166998	0.36337	0.498108	0.154824
BTSC_BT127_L_GGAACTTCACGAAAGC	-3.59615	15.334	BT127_L	BT127	GSC	0.406622	0.219376	0.330251	0.475261	0.55229
BTSC_BT127_L_GGAACTTCAGATAATG	-2.56328	13.3595	BT127_L	BT127	GSC	0.398449	0.195272	0.52091	0.403754	0.405439
BTSC_BT127_L_GGAATAAGTTTGACAC	-21.089	3.91142	BT127_L	BT127	GSC	0.377012	0.238009	0.370166	0.392367	0.370569
BTSC_BT127_L_GGAATAATCAGGTAAA	-13.6056	1.24649	BT127_L	BT127	GSC	0.313967	0.195455	0.49434	0.327639	0.337888
BTSC_BT127_L_GGACAAGTCAAGGTAA	-13.5604	8.81928	BT127_L	BT127	GSC	0.459018	0.232132	0.418527	0.261505	0.559603
BTSC_BT127_L_GGACAAGTCGCCTGTT	-11.7729	2.64047	BT127_L	BT127	GSC	0.287276	0.212739	0.465532	0.530341	0.340193
BTSC_BT127_L_GGACAAGTCTCGATGA	-11.2244	7.69306	BT127_L	BT127	GSC	0.408372	0.340612	0.387146	0.346937	0.731512
BTSC_BT127_L_GGACAGAGTCTAGTGT	-11.3501	17.7134	BT127_L	BT127	GSC	0.550812	0.228209	0.49243	0.474275	0.405097
BTSC_BT127_L_GGACATTCACCATCCT	-6.56236	17.3102	BT127_L	BT127	GSC	0.403186	0.160092	0.391497	0.460275	0.281834
BTSC_BT127_L_GGACGTCAGTAATCCC	-12.6222	5.26335	BT127_L	BT127	GSC	0.341997	0.205659	0.390515	0.396205	0.444517
BTSC_BT127_L_GGACGTCGTACCGTTA	-19.3039	-2.03309	BT127_L	BT127	GSC	0.313787	0.223857	0.414897	0.424614	0.26547
BTSC_BT127_L_GGACGTCTCATAGCAC	-11.3979	6.60438	BT127_L	BT127	GSC	0.319401	0.231809	0.47212	0.370083	0.431321
BTSC_BT127_L_GGACGTCTCTCCAACC	-12.6372	-8.67975	BT127_L	BT127	GSC	0.307494	0.227785	0.431138	0.347627	0.320225
BTSC_BT127_L_GGAGCAAAGCCAACAG	-10.7805	7.55036	BT127_L	BT127	GSC	0.37422	0.263185	0.45362	0.468883	0.488835
BTSC_BT127_L_GGAGCAAGTGAGGGTT	1.34529	7.11365	BT127_L	BT127	GSC	0.369449	0.382751	0.66253	0.277301	0.514504
BTSC_BT127_L_GGATGTTAGTTCGATC	-1.62886	11.0807	BT127_L	BT127	GSC	0.483345	0.290921	0.444562	0.39327	0.593614
BTSC_BT127_L_GGATGTTTCACGCATA	3.43796	20.1382	BT127_L	BT127	GSC	0.43649	0.221855	0.25671	0.568242	0.489568
BTSC_BT127_L_GGATTACGTTTGTTGG	-11.8419	10.1027	BT127_L	BT127	GSC	0.356647	0.193121	0.407699	0.437293	0.361028
BTSC_BT127_L_GGCCGATCACTACAGT	7.00896	15.8911	BT127_L	BT127	GSC	0.385633	0.301532	0.359294	0.46641	0.169075
BTSC_BT127_L_GGCCGATCAGGCTCAC	-18.6328	-1.72279	BT127_L	BT127	GSC	0.319345	0.220175	0.497661	0.401135	0.321777
BTSC_BT127_L_GGCCGATGTCTTCAAG	-6.27731	7.65932	BT127_L	BT127	GSC	0.343107	0.396483	0.4105	0.348735	0.545588
BTSC_BT127_L_GGCGACTAGCACGCCT	-18.5626	12.2126	BT127_L	BT127	GSC	0.349083	0.278268	0.438446	0.528798	0.525959
BTSC_BT127_L_GGCGACTAGCAGATCG	-5.24236	13.2548	BT127_L	BT127	GSC	0.426571	0.235757	0.554549	0.507175	0.413037
BTSC_BT127_L_GGCGACTAGGCTATCT	-17.1584	0.90769	BT127_L	BT127	GSC	0.340755	0.251893	0.49907	0.44574	0.324818
BTSC_BT127_L_GGCGACTCACCAGCAC	-10.4655	14.2129	BT127_L	BT127	GSC	0.440458	0.174644	0.376609	0.418024	0.262382
BTSC_BT127_L_GGCGACTGTGCCTTGG	-15.2882	4.28466	BT127_L	BT127	GSC	0.300069	0.250726	0.371301	0.392449	0.332217
BTSC_BT127_L_GGCGACTTCCTTTCGG	-5.56089	12.1757	BT127_L	BT127	GSC	0.436669	0.278115	0.435496	0.32588	0.620348
BTSC_BT127_L_GGCGACTTCGCCTGTT	-4.53201	13.9636	BT127_L	BT127	GSC	0.469117	0.218833	0.415679	0.531881	0.468773
BTSC_BT127_L_GGCGTGTAGATACACA	-15.7032	2.75514	BT127_L	BT127	GSC	0.335584	0.212563	0.420239	0.428651	0.361621
BTSC_BT127_L_GGCGTGTCACTATCTT	-13.0083	8.95935	BT127_L	BT127	GSC	0.545775	0.323717	0.39864	0.314967	0.538514
BTSC_BT127_L_GGCTCGATCGAGCCCA	-6.78597	9.57939	BT127_L	BT127	GSC	0.446269	0.266593	0.455475	0.32016	0.633345
BTSC_BT127_L_GGCTGGTTCAAGAAGT	-6.44087	14.1398	BT127_L	BT127	GSC	0.326529	0.224749	0.432594	0.285115	0.405507
BTSC_BT127_L_GGGAATGGTTATGTGC	-10.0643	10.7017	BT127_L	BT127	GSC	0.336437	0.268351	0.504438	0.323931	0.336938
BTSC_BT127_L_GGGACCTAGATCCTGT	-0.305919	18.6413	BT127_L	BT127	GSC	0.405796	0.149101	0.35001	0.446222	0.29998
BTSC_BT127_L_GGGAGATAGGGTATCG	-11.5035	-4.75301	BT127_L	BT127	GSC	0.305024	0.186112	0.47645	0.363688	0.240286
BTSC_BT127_L_GGGAGATAGTTTCCTT	-7.84607	13.1702	BT127_L	BT127	GSC	0.402001	0.242069	0.363652	0.364411	0.216914
BTSC_BT127_L_GGGAGATTCAAGCCTA	-6.68204	9.1796	BT127_L	BT127	GSC	0.32043	0.220816	0.422258	0.302649	0.345282
BTSC_BT127_L_GGGATGAAGAAGGTGA	-14.164	6.34585	BT127_L	BT127	GSC	0.438804	0.321501	0.404965	0.466939	0.443829
BTSC_BT127_L_GGGATGATCAACCATG	-14.2181	6.7354	BT127_L	BT127	GSC	0.336411	0.232469	0.470878	0.348334	0.250394
BTSC_BT127_L_GGGATGATCCGAACGC	-6.67584	14.6863	BT127_L	BT127	GSC	0.481065	0.245186	0.3846	0.276004	0.371006
BTSC_BT127_L_GGGCATCGTCTGCGGT	-16.3519	-4.79582	BT127_L	BT127	GSC	0.301754	0.184194	0.481398	0.403365	0.249172
BTSC_BT127_L_GGGCATCGTGACCAAG	-7.12363	7.36129	BT127_L	BT127	GSC	0.355802	0.28228	0.400887	0.380184	0.479438
BTSC_BT127_L_GGGTCTGAGGTGTTAA	-10.911	6.97005	BT127_L	BT127	GSC	0.311171	0.235018	0.44965	0.398187	0.350617
BTSC_BT127_L_GGGTCTGCATTAGCCA	-16.3619	12.4895	BT127_L	BT127	GSC	0.361166	0.156975	0.381932	0.359513	0.37401
BTSC_BT127_L_GGGTCTGGTACTTAGC	2.27971	8.27946	BT127_L	BT127	GSC	0.390248	0.337862	0.471937	0.3597	0.571153
BTSC_BT127_L_GGGTCTGTCATCACCC	-10.8336	11.6268	BT127_L	BT127	GSC	0.452668	0.205393	0.49771	0.515094	0.529399
BTSC_BT127_L_GGGTTGCCAAAGCAAT	-19.0178	-7.94375	BT127_L	BT127	GSC	0.317568	0.18399	0.428271	0.425376	0.231115
BTSC_BT127_L_GGGTTGCCAGGGAGAG	-3.52102	10.1809	BT127_L	BT127	GSC	0.414475	0.291703	0.387265	0.396111	0.448461
BTSC_BT127_L_GGGTTGCGTAGAGTGC	-16.8954	15.2721	BT127_L	BT127	GSC	0.418995	0.218668	0.353923	0.365786	0.499351
BTSC_BT127_L_GGGTTGCGTAGCAAAT	-11.1348	2.16408	BT127_L	BT127	GSC	0.356124	0.142449	0.396097	0.413284	0.198571
BTSC_BT127_L_GGGTTGCGTATAAACG	-3.14833	15.6975	BT127_L	BT127	GSC	0.446102	0.225218	0.419542	0.380853	0.414433
BTSC_BT127_L_GGGTTGCTCCTACAGA	-14.1478	13.6023	BT127_L	BT127	GSC	0.341801	0.22708	0.432922	0.472438	0.626262
BTSC_BT127_L_GGTATTGAGTGGAGTC	-15.2451	-0.0326697	BT127_L	BT127	GSC	0.319976	0.254899	0.515379	0.474672	0.40648
BTSC_BT127_L_GGTGAAGAGCAGATCG	-12.6704	9.6824	BT127_L	BT127	GSC	0.383021	0.234668	0.438871	0.425624	0.314234
BTSC_BT127_L_GGTGAAGCAGCTCCGA	-9.8695	6.63301	BT127_L	BT127	GSC	0.368332	0.331627	0.451473	0.416201	0.592582
BTSC_BT127_L_GGTGAAGCATACTACG	-12.7961	12.6907	BT127_L	BT127	GSC	0.309373	0.241942	0.354741	0.603416	0.324343
BTSC_BT127_L_GGTGAAGGTAAACCTC	-16.1881	-9.13694	BT127_L	BT127	GSC	0.288731	0.199321	0.413349	0.425549	0.19631
BTSC_BT127_L_GGTGAAGTCGGTCCGA	-5.79539	9.23277	BT127_L	BT127	GSC	0.407322	0.305553	0.396814	0.300102	0.457169
BTSC_BT127_L_GGTGCGTAGCTCCTTC	4.27901	17.3905	BT127_L	BT127	GSC	0.406055	0.304639	0.405993	0.487248	0.433157
BTSC_BT127_L_GGTGCGTAGTTCGATC	-4.89069	8.77762	BT127_L	BT127	GSC	0.403606	0.231251	0.621184	0.405433	0.49825
BTSC_BT127_L_GGTGCGTGTCCAACTA	-15.5871	8.08802	BT127_L	BT127	GSC	0.493993	0.213708	0.440643	0.499301	0.5074
BTSC_BT127_L_GGTGCGTTCGGTTAAC	-12.5215	16.0227	BT127_L	BT127	GSC	0.513663	0.189925	0.425881	0.478964	0.390224
BTSC_BT127_L_GGTGTTAGTACCGAGA	-10.3222	9.13842	BT127_L	BT127	GSC	0.304994	0.240688	0.43228	0.451928	0.306423
BTSC_BT127_L_GGTGTTAGTATAGGGC	-12.0704	0.388728	BT127_L	BT127	GSC	0.275926	0.205138	0.410224	0.474469	0.257057
BTSC_BT127_L_GGTGTTAGTCAATACC	0.23884	19.1234	BT127_L	BT127	GSC	0.384035	0.147469	0.324557	0.684343	0.451181
BTSC_BT127_L_GGTGTTAGTCCGAGTC	-11.3999	6.87058	BT127_L	BT127	GSC	0.305316	0.247142	0.426706	0.451252	0.330608
BTSC_BT127_L_GGTGTTATCATAGCAC	-11.1028	5.9597	BT127_L	BT127	GSC	0.280758	0.313485	0.535195	0.351307	0.33299
BTSC_BT127_L_GTAACTGTCTTTAGGG	-13.7419	7.6307	BT127_L	BT127	GSC	0.340573	0.212937	0.400269	0.384324	0.490975
BTSC_BT127_L_GTACGTACATCGATGT	2.26092	15.4321	BT127_L	BT127	GSC	0.473093	0.275175	0.428446	0.333483	0.643506
BTSC_BT127_L_GTACGTATCATAAAGG	-7.43493	10.4926	BT127_L	BT127	GSC	0.331467	0.23119	0.485223	0.543309	0.394099
BTSC_BT127_L_GTACGTATCTCGAGTA	-19.079	17.2519	BT127_L	BT127	GSC	0.452396	0.224499	0.442821	0.52131	0.310648
BTSC_BT127_L_GTACTCCCATGAAGTA	-16.1216	-2.01785	BT127_L	BT127	GSC	0.320429	0.164271	0.46474	0.379601	0.235123
BTSC_BT127_L_GTACTCCTCCGGCACA	-13.6816	-5.69809	BT127_L	BT127	GSC	0.283056	0.176207	0.42849	0.361549	0.315671
BTSC_BT127_L_GTACTTTAGCGTGTCC	-4.92148	8.33227	BT127_L	BT127	GSC	0.272837	0.27319	0.561545	0.32164	0.255092
BTSC_BT127_L_GTACTTTAGTCGCCGT	-18.8746	10.6702	BT127_L	BT127	GSC	0.300055	0.307731	0.532498	0.456289	0.372539
BTSC_BT127_L_GTAGGCCCATACTACG	-13.8977	-3.74232	BT127_L	BT127	GSC	0.323318	0.174977	0.425063	0.422415	0.194739
BTSC_BT127_L_GTAGGCCGTGTCAATC	-3.4612	15.4941	BT127_L	BT127	GSC	0.479954	0.234004	0.380789	0.503115	0.535553
BTSC_BT127_L_GTAGGCCTCGTCCAGG	-3.1457	10.8281	BT127_L	BT127	GSC	0.419743	0.338969	0.394618	0.278308	0.657649
BTSC_BT127_L_GTATCTTAGCCATCGC	-8.14536	9.43933	BT127_L	BT127	GSC	0.412459	0.318952	0.448155	0.331154	0.668533
BTSC_BT127_L_GTATCTTCATTCTCAT	-9.40867	8.77786	BT127_L	BT127	GSC	0.391713	0.28732	0.408273	0.379952	0.30968
BTSC_BT127_L_GTATCTTGTTAGGGTG	-7.93985	5.17828	BT127_L	BT127	GSC	0.303693	0.209192	0.37636	0.475952	0.340062
BTSC_BT127_L_GTATTCTCATTGGTAC	-16.0999	4.15668	BT127_L	BT127	GSC	0.338382	0.241119	0.505706	0.366285	0.3394
BTSC_BT127_L_GTATTCTTCACTTCAT	-14.876	5.98088	BT127_L	BT127	GSC	0.317156	0.237696	0.469489	0.459914	0.221689
BTSC_BT127_L_GTCAAGTTCCCTAATT	-10.4341	0.0467336	BT127_L	BT127	GSC	0.311813	0.265366	0.434575	0.434418	0.290248
BTSC_BT127_L_GTCACAAAGAATGTGT	-5.11535	13.2179	BT127_L	BT127	GSC	0.345956	0.239883	0.40514	0.681092	0.286124
BTSC_BT127_L_GTCACAAAGGACAGAA	-7.6642	11.1437	BT127_L	BT127	GSC	0.305867	0.279533	0.48917	0.477775	0.347741
BTSC_BT127_L_GTCACAAAGGGCTCTC	-0.151536	19.2269	BT127_L	BT127	GSC	0.419559	0.219175	0.444647	0.405748	0.271739
BTSC_BT127_L_GTCACAAGTCTGCAAT	-14.5055	0.985799	BT127_L	BT127	GSC	0.347346	0.171321	0.412311	0.408401	0.382603
BTSC_BT127_L_GTCACAATCCCGGATG	-6.88893	9.44581	BT127_L	BT127	GSC	0.417066	0.285034	0.445544	0.337848	0.446468
BTSC_BT127_L_GTCACGGGTTATCCGA	-0.0449345	13.2718	BT127_L	BT127	GSC	0.43382	0.241942	0.431944	0.389822	0.433219
BTSC_BT127_L_GTCATTTAGGACACCA	-13.2437	14.6926	BT127_L	BT127	GSC	0.48047	0.223579	0.444494	0.437249	0.485302
BTSC_BT127_L_GTCATTTTCAGCACAT	-11.1845	10.6529	BT127_L	BT127	GSC	0.434597	0.175212	0.373072	0.521576	0.217768
BTSC_BT127_L_GTCATTTTCGTGGACC	-15.4676	9.80514	BT127_L	BT127	GSC	0.323613	0.240621	0.443586	0.380061	0.246218
BTSC_BT127_L_GTCATTTTCTGTCAAG	-2.19082	17.8986	BT127_L	BT127	GSC	0.448527	0.200213	0.434954	0.419378	0.279305
BTSC_BT127_L_GTCCTCAAGTATTGGA	-12.3243	10.3395	BT127_L	BT127	GSC	0.346343	0.229079	0.367858	0.454332	0.323255
BTSC_BT127_L_GTCCTCACAGTAGAGC	-19.0485	-6.86149	BT127_L	BT127	GSC	0.301179	0.181281	0.412197	0.435602	0.211625
BTSC_BT127_L_GTCCTCAGTTGTCTTT	-11.3913	9.55862	BT127_L	BT127	GSC	0.321387	0.249283	0.478583	0.404236	0.364792
BTSC_BT127_L_GTCCTCATCGGTGTCG	-10.1081	11.4793	BT127_L	BT127	GSC	0.487498	0.243591	0.382029	0.402987	0.621525
BTSC_BT127_L_GTCGGGTCATCCGGGT	-8.71004	4.03959	BT127_L	BT127	GSC	0.417575	0.355285	0.399612	0.249577	0.511759
BTSC_BT127_L_GTCGGGTTCATCACCC	-5.62501	10.5807	BT127_L	BT127	GSC	0.38751	0.261058	0.398088	0.307734	0.498184
BTSC_BT127_L_GTCGGGTTCTCCTATA	-15.9674	3.3768	BT127_L	BT127	GSC	0.333612	0.210902	0.467539	0.471066	0.294236
BTSC_BT127_L_GTCGTAAGTCCGACGT	-9.80778	5.28158	BT127_L	BT127	GSC	0.448204	0.280716	0.378053	0.41909	0.434819
BTSC_BT127_L_GTCTTCGAGAATTCCC	-22.1832	2.96981	BT127_L	BT127	GSC	0.405567	0.179838	0.526706	0.447333	0.316165
BTSC_BT127_L_GTCTTCGTCGAGGTAG	-16.173	2.89347	BT127_L	BT127	GSC	0.31432	0.22967	0.414181	0.363623	0.297398
BTSC_BT127_L_GTGAAGGCAATCACAC	-10.1315	7.36792	BT127_L	BT127	GSC	0.41234	0.345252	0.49328	0.433077	0.472566
BTSC_BT127_L_GTGAAGGGTCCAACTA	3.89051	19.3623	BT127_L	BT127	GSC	0.421578	0.247741	0.365577	0.659096	0.273686
BTSC_BT127_L_GTGAAGGGTCCGCTGA	-15.225	12.9519	BT127_L	BT127	GSC	0.343858	0.164007	0.345485	0.717822	0.297152
BTSC_BT127_L_GTGCAGCTCCGTCAAA	1.59988	16.1256	BT127_L	BT127	GSC	0.433845	0.147614	0.318936	0.393347	0.419914
BTSC_BT127_L_GTGCAGCTCTTGTCAT	-15.5797	2.95439	BT127_L	BT127	GSC	0.339534	0.204589	0.45894	0.557106	0.412396
BTSC_BT127_L_GTGCATAAGATCCTGT	-3.84824	-8.22205	BT127_L	BT127	GSC	0.257353	0.212268	0.464234	0.518429	0.11628
BTSC_BT127_L_GTGCATAAGCTCCCAG	-15.4015	-0.63397	BT127_L	BT127	GSC	0.326406	0.180794	0.379534	0.38982	0.295241
BTSC_BT127_L_GTGCATAAGCTGCCCA	3.37678	8.93026	BT127_L	BT127	GSC	0.251414	0.243794	0.468015	0.417339	0.175004
BTSC_BT127_L_GTGCATAAGTTAACGA	0.544742	14.7094	BT127_L	BT127	GSC	0.401626	0.227192	0.537116	0.28434	0.330491
BTSC_BT127_L_GTGCATACAGGTGCCT	-7.84687	13.9134	BT127_L	BT127	GSC	0.334287	0.24564	0.490411	0.377704	0.439072
BTSC_BT127_L_GTGCATACATACCATG	-13.1023	8.78027	BT127_L	BT127	GSC	0.411923	0.207661	0.376476	0.425388	0.427193
BTSC_BT127_L_GTGCGGTAGTATCTCG	-15.8075	12.508	BT127_L	BT127	GSC	0.362919	0.247265	0.522111	0.374784	0.330075
BTSC_BT127_L_GTGCGGTGTGCGATAG	-12.635	19.1883	BT127_L	BT127	GSC	0.496442	0.197666	0.397811	0.415429	0.432409
BTSC_BT127_L_GTGCTTCCACACTGCG	-15.3753	8.39941	BT127_L	BT127	GSC	0.345207	0.261894	0.449096	0.453462	0.313455
BTSC_BT127_L_GTGCTTCCACAGACTT	-0.0489486	16.4845	BT127_L	BT127	GSC	0.43264	0.234024	0.468076	0.327084	0.417458
BTSC_BT127_L_GTGCTTCGTAGAGGAA	-3.31835	12.1815	BT127_L	BT127	GSC	0.395554	0.271546	0.458342	0.373101	0.342164
BTSC_BT127_L_GTGGGTCCACACAGAG	7.27517	16.4453	BT127_L	BT127	GSC	0.377855	0.281039	0.382332	0.482742	0.435818
BTSC_BT127_L_GTGGGTCCACGGTAAG	-7.53068	9.97984	BT127_L	BT127	GSC	0.430157	0.250612	0.539047	0.35556	0.401225
BTSC_BT127_L_GTGGGTCGTCAGTGGA	-15.3257	11.4915	BT127_L	BT127	GSC	0.36009	0.28843	0.442662	0.370024	0.443754
BTSC_BT127_L_GTGTGCGAGATCGGGT	-6.02112	12.1767	BT127_L	BT127	GSC	0.386845	0.269227	0.396302	0.384026	0.394746
BTSC_BT127_L_GTGTGCGCACATTAGC	-10.2266	2.15984	BT127_L	BT127	GSC	0.302768	0.218093	0.413462	0.426021	0.271614
BTSC_BT127_L_GTGTGCGCAGCCTTGG	7.25249	11.533	BT127_L	BT127	GSC	0.346708	0.38091	0.516963	0.380336	0.416311
BTSC_BT127_L_GTGTGCGGTGTTCGAT	-18.0865	-11.649	BT127_L	BT127	GSC	0.282441	0.186754	0.404017	0.363931	0.194673
BTSC_BT127_L_GTGTTAGAGATGCCTT	-17.4865	-9.06247	BT127_L	BT127	GSC	0.311086	0.233012	0.49811	0.348843	0.306421
BTSC_BT127_L_GTGTTAGAGCCGTCGT	-11.3946	16.0546	BT127_L	BT127	GSC	0.380193	0.206132	0.359661	0.628898	0.499182
BTSC_BT127_L_GTGTTAGAGCTAGTTC	-7.96725	9.41133	BT127_L	BT127	GSC	0.423787	0.220196	0.315344	0.313103	0.501569
BTSC_BT127_L_GTGTTAGGTTTGCATG	-2.6201	3.53581	BT127_L	BT127	GSC	0.325389	0.390529	0.477112	0.445839	0.449549
BTSC_BT127_L_GTGTTAGTCATGGTCA	-7.90565	10.9388	BT127_L	BT127	GSC	0.443022	0.259568	0.437803	0.329856	0.535266
BTSC_BT127_L_GTTAAGCAGACCACGA	-1.54512	22.1032	BT127_L	BT127	GSC	0.427004	0.141564	0.296722	0.619901	0.472541
BTSC_BT127_L_GTTAAGCAGTAGTGCG	-12.4186	10.7411	BT127_L	BT127	GSC	0.333255	0.234041	0.421276	0.34702	0.37161
BTSC_BT127_L_GTTAAGCTCGGATGTT	-6.01768	10.5923	BT127_L	BT127	GSC	0.309229	0.181529	0.3721	0.378145	0.29792
BTSC_BT127_L_GTTACAGCAGTGGGAT	-14.1994	6.89698	BT127_L	BT127	GSC	0.328868	0.20866	0.46917	0.562463	0.307707
BTSC_BT127_L_GTTCTCGAGACTTTCG	-12.6686	7.24442	BT127_L	BT127	GSC	0.467651	0.208751	0.431314	0.390543	0.440143
BTSC_BT127_L_GTTTCTAAGGTGATAT	-0.707772	17.4185	BT127_L	BT127	GSC	0.419739	0.189732	0.309378	0.546844	0.421323
BTSC_BT127_L_GTTTCTACAACACCCG	-7.22253	8.37032	BT127_L	BT127	GSC	0.401177	0.240935	0.532817	0.484477	0.467308
BTSC_BT127_L_GTTTCTACACAAGTAA	-15.3431	-0.168822	BT127_L	BT127	GSC	0.294021	0.243636	0.412551	0.35093	0.379871
BTSC_BT127_L_GTTTCTACAGCTGTGC	-7.76937	14.1325	BT127_L	BT127	GSC	0.333748	0.23761	0.506097	0.432517	0.35777
BTSC_BT127_L_GTTTCTAGTCGAACAG	-9.50304	11.6558	BT127_L	BT127	GSC	0.424791	0.274397	0.369322	0.451135	0.538519
BTSC_BT127_L_GTTTCTATCAGCACAT	-22.9145	0.523214	BT127_L	BT127	GSC	0.353217	0.154506	0.429478	0.507061	0.305372
BTSC_BT127_L_GTTTCTATCATGTAGC	-14.4622	-3.48795	BT127_L	BT127	GSC	0.314735	0.18839	0.450903	0.455067	0.356341
BTSC_BT127_L_TAAACCGAGACCGGAT	-3.02554	14.9892	BT127_L	BT127	GSC	0.304342	0.241798	0.492645	0.501166	0.39756
BTSC_BT127_L_TAAACCGAGTCTTGCA	-14.7881	6.9044	BT127_L	BT127	GSC	0.355674	0.192534	0.451825	0.392122	0.540884
BTSC_BT127_L_TAAACCGAGTGCCATT	-14.5927	1.32785	BT127_L	BT127	GSC	0.316332	0.186995	0.446549	0.432698	0.23253
BTSC_BT127_L_TAAGAGAAGCACACAG	-1.18512	16.2455	BT127_L	BT127	GSC	0.420698	0.198587	0.340544	0.551953	0.213639
BTSC_BT127_L_TAAGAGAGTATTCGTG	-12.9957	1.44623	BT127_L	BT127	GSC	0.304372	0.244245	0.493449	0.453766	0.290431
BTSC_BT127_L_TAAGAGAGTGACGCCT	-9.0122	8.74998	BT127_L	BT127	GSC	0.338905	0.199251	0.383519	0.562163	0.235819
BTSC_BT127_L_TAAGAGATCAAACCAC	-8.29992	9.76679	BT127_L	BT127	GSC	0.29188	0.265277	0.493279	0.367916	0.4174
BTSC_BT127_L_TAAGAGATCACTTCAT	-12.3941	14.3227	BT127_L	BT127	GSC	0.336432	0.233835	0.329962	0.674345	0.0768637
BTSC_BT127_L_TAAGCGTAGTGTACGG	-10.3901	2.74401	BT127_L	BT127	GSC	0.377273	0.232114	0.534852	0.475169	0.311217
BTSC_BT127_L_TAAGCGTCAGCTGTTA	-13.2275	8.09097	BT127_L	BT127	GSC	0.329713	0.249631	0.461147	0.408735	0.368661
BTSC_BT127_L_TAAGTGCGTCTCTTAT	-11.7908	12.6609	BT127_L	BT127	GSC	0.337101	0.316544	0.469897	0.365937	0.508736
BTSC_BT127_L_TAAGTGCTCACATACG	-8.38832	13.3859	BT127_L	BT127	GSC	0.475217	0.161407	0.34021	0.383799	0.368348
BTSC_BT127_L_TAAGTGCTCCGCGCAA	-3.32398	10.0551	BT127_L	BT127	GSC	0.326416	0.301165	0.369772	0.529262	0.471181
BTSC_BT127_L_TAAGTGCTCTGATACG	-13.3025	-5.55793	BT127_L	BT127	GSC	0.299281	0.19065	0.402066	0.390937	0.283296
BTSC_BT127_L_TACACGAAGTTTCCTT	-11.8738	1.79183	BT127_L	BT127	GSC	0.359191	0.199916	0.43155	0.396526	0.274315
BTSC_BT127_L_TACACGACATAGAAAC	-8.97742	8.89984	BT127_L	BT127	GSC	0.382073	0.171527	0.391703	0.391725	0.573263
BTSC_BT127_L_TACACGATCTATCGCC	-8.30222	11.6379	BT127_L	BT127	GSC	0.332528	0.27234	0.449276	0.378852	0.301007
BTSC_BT127_L_TACAGTGAGTCGTACT	-12.4493	6.0736	BT127_L	BT127	GSC	0.290043	0.336091	0.493052	0.440006	0.473593
BTSC_BT127_L_TACAGTGTCACCAGGC	-14.1455	9.3598	BT127_L	BT127	GSC	0.369172	0.289687	0.613803	0.422099	0.390203
BTSC_BT127_L_TACCTATCAATGCCAT	-15.7577	7.36981	BT127_L	BT127	GSC	0.366622	0.219712	0.441026	0.306196	0.363245
BTSC_BT127_L_TACCTATGTCACTGGC	-16.1894	-7.74691	BT127_L	BT127	GSC	0.312444	0.1793	0.392221	0.407562	0.379312
BTSC_BT127_L_TACCTTACATTGGCGC	-12.1286	0.080796	BT127_L	BT127	GSC	0.292807	0.193049	0.421902	0.502382	0.188769
BTSC_BT127_L_TACCTTAGTCCTCTTG	-18.6155	-7.91819	BT127_L	BT127	GSC	0.297524	0.177538	0.448109	0.371061	0.185722
BTSC_BT127_L_TACGGATCAGTAAGAT	-14.2415	8.06164	BT127_L	BT127	GSC	0.343812	0.224044	0.455054	0.289249	0.377411
BTSC_BT127_L_TACGGGCAGGGCACTA	-13.9133	-4.56396	BT127_L	BT127	GSC	0.311715	0.189765	0.403732	0.412349	0.361467
BTSC_BT127_L_TACGGGCCACAACGTT	-15.0923	4.4955	BT127_L	BT127	GSC	0.347529	0.245747	0.468026	0.387824	0.390258
BTSC_BT127_L_TACGGGCGTACGACCC	-12.0612	11.6845	BT127_L	BT127	GSC	0.43619	0.225494	0.368936	0.544873	0.571854
BTSC_BT127_L_TACGGTAAGGTGCTAG	-5.14947	6.95408	BT127_L	BT127	GSC	0.363331	0.272576	0.477699	0.356542	0.343454
BTSC_BT127_L_TACGGTAGTGTCGCTG	-5.94517	12.5558	BT127_L	BT127	GSC	0.426618	0.26753	0.387848	0.257491	0.271905
BTSC_BT127_L_TACGGTATCGCCCTTA	-6.40711	12.6629	BT127_L	BT127	GSC	0.59558	0.288895	0.323906	0.390604	0.584527
BTSC_BT127_L_TACGGTATCTCCGGTT	-9.59183	11.4915	BT127_L	BT127	GSC	0.423004	0.262849	0.514328	0.361656	0.432551
BTSC_BT127_L_TACTCATAGAATGTTG	-15.3723	-4.54022	BT127_L	BT127	GSC	0.330876	0.145719	0.397904	0.495942	0.211135
BTSC_BT127_L_TACTCATGTAACGACG	-8.03866	2.06224	BT127_L	BT127	GSC	0.440756	0.377147	0.509775	0.243382	0.454559
BTSC_BT127_L_TACTCATGTGTGCGTC	-15.2306	10.2464	BT127_L	BT127	GSC	0.356648	0.289687	0.546001	0.498849	0.524156
BTSC_BT127_L_TACTCATTCCAGTAGT	5.94144	19.3056	BT127_L	BT127	GSC	0.484233	0.236583	0.353069	0.467425	0.546887
BTSC_BT127_L_TACTCATTCTCTTGAT	-14.9981	10.2757	BT127_L	BT127	GSC	0.378214	0.147893	0.360074	0.565887	0.499291
BTSC_BT127_L_TACTCGCCAAACGCGA	-8.14472	11.1663	BT127_L	BT127	GSC	0.356115	0.252098	0.457309	0.459379	0.475654
BTSC_BT127_L_TACTCGCTCCAGGGCT	-7.66673	8.86096	BT127_L	BT127	GSC	0.399276	0.210818	0.418361	0.534763	0.330614
BTSC_BT127_L_TACTTACAGGCAAAGA	-16.2526	-11.5869	BT127_L	BT127	GSC	0.270838	0.208137	0.467308	0.422087	0.140588
BTSC_BT127_L_TACTTACCAGCTATTG	-3.22292	10.3385	BT127_L	BT127	GSC	0.33833	0.178913	0.411381	0.501679	0.391678
BTSC_BT127_L_TACTTACCAGGCAGTA	-0.670949	9.12441	BT127_L	BT127	GSC	0.393025	0.274787	0.390622	0.472833	0.632356
BTSC_BT127_L_TACTTGTAGAGACGAA	-14.6457	4.40374	BT127_L	BT127	GSC	0.355235	0.186106	0.41319	0.379889	0.301489
BTSC_BT127_L_TACTTGTCAATCGAAA	-4.58561	9.7878	BT127_L	BT127	GSC	0.41423	0.256542	0.525317	0.278038	0.481862
BTSC_BT127_L_TACTTGTCAGGGCATA	-8.72485	-1.16368	BT127_L	BT127	GSC	0.26695	0.243195	0.442783	0.405776	0.213669
BTSC_BT127_L_TACTTGTGTCTCTTAT	-8.62306	-1.64985	BT127_L	BT127	GSC	0.257695	0.243015	0.454326	0.469841	0.265227
BTSC_BT127_L_TAGACCAAGAGGGCTT	-7.5909	6.93292	BT127_L	BT127	GSC	0.278193	0.236945	0.463962	0.353011	0.345723
BTSC_BT127_L_TAGACCAAGCTGGAAC	-20.5387	-0.0149051	BT127_L	BT127	GSC	0.358343	0.208803	0.49392	0.433754	0.410015
BTSC_BT127_L_TAGACCATCAAACCAC	-11.1495	10.2089	BT127_L	BT127	GSC	0.391551	0.282004	0.541388	0.399385	0.414737
BTSC_BT127_L_TAGAGCTAGCGTAATA	-3.57608	8.85988	BT127_L	BT127	GSC	0.353351	0.3051	0.420964	0.320405	0.582668
BTSC_BT127_L_TAGAGCTGTCAATGTC	-7.79494	15.9702	BT127_L	BT127	GSC	0.342156	0.28438	0.459802	0.518267	0.467141
BTSC_BT127_L_TAGAGCTGTTGGAGGT	-13.155	-6.06601	BT127_L	BT127	GSC	0.285826	0.208412	0.462463	0.418854	0.157646
BTSC_BT127_L_TAGAGCTTCGTCACGG	-11.1132	10.1461	BT127_L	BT127	GSC	0.297264	0.205656	0.354569	0.571757	0.148342
BTSC_BT127_L_TAGCCGGCACAGACTT	-10.6906	-2.37443	BT127_L	BT127	GSC	0.316464	0.203437	0.421753	0.361363	0.288223
BTSC_BT127_L_TAGCCGGGTGAAAGAG	-11.1651	5.03326	BT127_L	BT127	GSC	0.320022	0.257774	0.499996	0.348716	0.4562
BTSC_BT127_L_TAGCCGGGTGAAATCA	-13.1808	-6.38637	BT127_L	BT127	GSC	0.282078	0.178877	0.393034	0.349243	0.257055
BTSC_BT127_L_TAGGCATAGGGAGTAA	-16.3257	19.6896	BT127_L	BT127	GSC	0.45077	0.159089	0.394552	0.432249	0.422818
BTSC_BT127_L_TAGGCATAGTACGATA	-11.8001	12.7415	BT127_L	BT127	GSC	0.355323	0.319948	0.396759	0.497395	0.482539
BTSC_BT127_L_TAGGCATAGTCGTACT	-10.9184	11.3251	BT127_L	BT127	GSC	0.434517	0.272782	0.475991	0.401073	0.578479
BTSC_BT127_L_TAGGCATCATGCCACG	-1.08096	8.40324	BT127_L	BT127	GSC	0.370142	0.274508	0.394557	0.510376	0.488946
BTSC_BT127_L_TAGGCATTCAACACAC	-9.07482	11.5404	BT127_L	BT127	GSC	0.366225	0.197186	0.433013	0.326735	0.296057
BTSC_BT127_L_TAGGCATTCTCGTATT	-9.35532	7.75699	BT127_L	BT127	GSC	0.344359	0.310974	0.502709	0.361947	0.345898
BTSC_BT127_L_TAGTGGTCATACGCTA	-8.4085	4.97673	BT127_L	BT127	GSC	0.330493	0.18279	0.507326	0.324701	0.438674
BTSC_BT127_L_TAGTGGTGTACAGTTC	2.75111	13.0295	BT127_L	BT127	GSC	0.402227	0.259839	0.449142	0.388845	0.491051
BTSC_BT127_L_TAGTGGTGTCTTCTCG	-16.9638	-2.86829	BT127_L	BT127	GSC	0.295279	0.212987	0.386803	0.50246	0.325064
BTSC_BT127_L_TATCAGGTCCTTGCCA	-6.81853	16.1017	BT127_L	BT127	GSC	0.374643	0.223133	0.546331	0.470585	0.442463
BTSC_BT127_L_TATCAGGTCGTAGGAG	0.549176	4.74518	BT127_L	BT127	GSC	0.308359	0.297092	0.449409	0.443884	0.257796
BTSC_BT127_L_TATCAGGTCTCACATT	-15.984	-6.94466	BT127_L	BT127	GSC	0.309655	0.210104	0.414751	0.476092	0.233435
BTSC_BT127_L_TATCTCAGTCTCTTAT	-1.8671	15.4664	BT127_L	BT127	GSC	0.380978	0.229227	0.351966	0.454982	0.3366
BTSC_BT127_L_TATGCCCCACGTCAGC	-2.629	12.3899	BT127_L	BT127	GSC	0.315373	0.282688	0.397751	0.559422	0.526107
BTSC_BT127_L_TATTACCAGGGATACC	-8.68634	15.3034	BT127_L	BT127	GSC	0.318408	0.253481	0.439853	0.352905	0.269081
BTSC_BT127_L_TATTACCGTAAAGTCA	-4.09159	8.41833	BT127_L	BT127	GSC	0.35412	0.269145	0.496081	0.47283	0.378101
BTSC_BT127_L_TATTACCGTTCTGAAC	-21.1998	-11.7009	BT127_L	BT127	GSC	0.337397	0.166259	0.441528	0.429607	0.162681
BTSC_BT127_L_TATTACCTCTCCAGGG	0.125171	8.85604	BT127_L	BT127	GSC	0.382527	0.300365	0.468169	0.460474	0.491317
BTSC_BT127_L_TCAACGACATGACATC	-3.98671	9.98543	BT127_L	BT127	GSC	0.45762	0.186986	0.381953	0.461321	0.401798
BTSC_BT127_L_TCAATCTAGTGAAGTT	-5.34616	23.2121	BT127_L	BT127	GSC	0.379985	0.210309	0.570207	0.42439	0.578939
BTSC_BT127_L_TCAATCTCACCAACCG	-12.8918	3.09952	BT127_L	BT127	GSC	0.413761	0.429513	0.427239	0.14922	0.505938
BTSC_BT127_L_TCACAAGCACCATGTA	-12.5698	12.4745	BT127_L	BT127	GSC	0.40103	0.173031	0.400724	0.4348	0.434546
BTSC_BT127_L_TCACAAGGTATCAGTC	-16.6514	3.53099	BT127_L	BT127	GSC	0.344467	0.33867	0.42519	0.469437	0.306594
BTSC_BT127_L_TCACAAGGTCTCCCTA	-15.7212	8.77544	BT127_L	BT127	GSC	0.320602	0.201438	0.384885	0.551456	0.224847
BTSC_BT127_L_TCACAAGTCACGACTA	4.27695	8.08966	BT127_L	BT127	GSC	0.332461	0.256043	0.434169	0.388269	0.356293
BTSC_BT127_L_TCACGAACAACCGCCA	-11.7235	16.2333	BT127_L	BT127	GSC	0.38767	0.177275	0.374631	0.394138	0.422357
BTSC_BT127_L_TCACGAACACCACGTG	-5.39908	13.1319	BT127_L	BT127	GSC	0.403889	0.247993	0.439032	0.260701	0.48929
BTSC_BT127_L_TCACGAATCCACGACG	-8.63569	8.73853	BT127_L	BT127	GSC	0.297593	0.282454	0.617565	0.483936	0.356891
BTSC_BT127_L_TCAGATGCAAAGAATC	-4.63509	6.38053	BT127_L	BT127	GSC	0.374631	0.344704	0.433985	0.273937	0.490515
BTSC_BT127_L_TCAGCAAAGAGTCGGT	-10.4922	9.03674	BT127_L	BT127	GSC	0.467393	0.241151	0.469836	0.460327	0.356327
BTSC_BT127_L_TCAGCAAAGGCGTACA	-7.61846	9.64396	BT127_L	BT127	GSC	0.306059	0.266265	0.468958	0.46391	0.350804
BTSC_BT127_L_TCAGCAACAGCGTCCA	-9.31328	-1.77619	BT127_L	BT127	GSC	0.315657	0.18781	0.476044	0.345392	0.240316
BTSC_BT127_L_TCAGCAAGTCTGATCA	-8.14325	6.04983	BT127_L	BT127	GSC	0.404078	0.296682	0.524248	0.543104	0.352696
BTSC_BT127_L_TCAGCAATCACGATGT	-4.346	7.58566	BT127_L	BT127	GSC	0.392101	0.34214	0.51007	0.387746	0.400972
BTSC_BT127_L_TCAGCTCGTGTGAATA	-4.06639	8.30583	BT127_L	BT127	GSC	0.452641	0.319877	0.490704	0.320523	0.54461
BTSC_BT127_L_TCAGCTCGTTTGGCGC	-5.83059	11.6169	BT127_L	BT127	GSC	0.407745	0.229141	0.415184	0.405582	0.319017
BTSC_BT127_L_TCAGCTCTCCAGTATG	-15.106	-1.1993	BT127_L	BT127	GSC	0.329732	0.18283	0.44425	0.395685	0.38271
BTSC_BT127_L_TCAGGATAGACCTTTG	-18.8567	8.90449	BT127_L	BT127	GSC	0.370047	0.19331	0.413764	0.28729	0.35638
BTSC_BT127_L_TCAGGATAGAGGTTAT	-12.9323	18.9859	BT127_L	BT127	GSC	0.456647	0.220681	0.444064	0.328529	0.61126
BTSC_BT127_L_TCAGGATCACCTTGTC	-9.94253	11.0502	BT127_L	BT127	GSC	0.421853	0.265296	0.407316	0.40787	0.408788
BTSC_BT127_L_TCAGGATGTCGTCTTC	-13.4827	10.7919	BT127_L	BT127	GSC	0.400869	0.29643	0.452896	0.348618	0.544077
BTSC_BT127_L_TCAGGTAAGCGATATA	-9.74765	5.10826	BT127_L	BT127	GSC	0.287267	0.295549	0.453136	0.34018	0.259003
BTSC_BT127_L_TCAGGTAAGTGTTAGA	2.22861	13.2199	BT127_L	BT127	GSC	0.411266	0.286296	0.313151	0.448828	0.404725
BTSC_BT127_L_TCAGGTATCACTTATC	-12.2447	9.53643	BT127_L	BT127	GSC	0.338869	0.241566	0.539985	0.365513	0.322538
BTSC_BT127_L_TCATTACAGGGCTTCC	-2.19796	12.0464	BT127_L	BT127	GSC	0.411442	0.318593	0.477415	0.383567	0.576642
BTSC_BT127_L_TCATTACCACTACAGT	-6.10349	7.6014	BT127_L	BT127	GSC	0.509647	0.299197	0.365323	0.254881	0.701191
BTSC_BT127_L_TCATTACTCACAATGC	-8.36296	7.04415	BT127_L	BT127	GSC	0.459521	0.393942	0.430103	0.249309	0.567073
BTSC_BT127_L_TCATTACTCGTACCGG	-5.54573	7.8335	BT127_L	BT127	GSC	0.321378	0.26851	0.458757	0.304435	0.329683
BTSC_BT127_L_TCATTTGAGAGCAATT	-10.0415	11.2271	BT127_L	BT127	GSC	0.469174	0.200372	0.306957	0.530009	0.439253
BTSC_BT127_L_TCATTTGCAATGTAAG	-4.98455	-6.09712	BT127_L	BT127	GSC	0.267404	0.182211	0.444193	0.407787	0.239292
BTSC_BT127_L_TCCACACAGGAACTGC	-5.40869	16.4992	BT127_L	BT127	GSC	0.33533	0.210822	0.454994	0.375703	0.37118
BTSC_BT127_L_TCCACACAGTTCGCGC	-11.0697	6.64554	BT127_L	BT127	GSC	0.412238	0.366426	0.427254	0.347861	0.544466
BTSC_BT127_L_TCCACACCAAAGGTGC	-14.0957	9.90753	BT127_L	BT127	GSC	0.466197	0.323034	0.444855	0.399406	0.5699
BTSC_BT127_L_TCCACACGTCCCTACT	-2.03391	9.9816	BT127_L	BT127	GSC	0.418802	0.280193	0.495047	0.267896	0.473149
BTSC_BT127_L_TCCCGATAGTACGCCC	-6.9054	16.0835	BT127_L	BT127	GSC	0.450505	0.267211	0.475837	0.378173	0.415267
BTSC_BT127_L_TCCCGATGTAGCCTCG	-19.2093	24.4582	BT127_L	BT127	GSC	0.514044	0.24194	0.395558	0.494401	0.620607
BTSC_BT127_L_TCCCGATGTTAAAGTG	-7.94444	16.6787	BT127_L	BT127	GSC	0.562938	0.233845	0.358963	0.460908	0.781273
BTSC_BT127_L_TCGAGGCAGATGTCGG	-12.4224	6.24667	BT127_L	BT127	GSC	0.359796	0.167639	0.44691	0.570828	0.232073
BTSC_BT127_L_TCGAGGCGTAAATGTG	-16.2459	-6.72861	BT127_L	BT127	GSC	0.306179	0.179249	0.380769	0.451538	0.294401
BTSC_BT127_L_TCGAGGCTCGAGAGCA	-13.9414	-1.9141	BT127_L	BT127	GSC	0.412077	0.327008	0.449709	0.403594	0.55321
BTSC_BT127_L_TCGCGAGAGGATGGTC	-15.6066	-7.27748	BT127_L	BT127	GSC	0.278899	0.21177	0.421819	0.483377	0.276582
BTSC_BT127_L_TCGCGAGCAGTATAAG	-15.6615	14.3131	BT127_L	BT127	GSC	0.475848	0.305336	0.360974	0.374785	0.697842
BTSC_BT127_L_TCGCGAGGTCCATCCT	-23.2089	3.92279	BT127_L	BT127	GSC	0.311362	0.173714	0.434894	0.379801	0.235529
BTSC_BT127_L_TCGCGTTCACCGAATT	4.78807	16.0287	BT127_L	BT127	GSC	0.384196	0.239589	0.386996	0.627952	0.530549
BTSC_BT127_L_TCGGGACAGATCCTGT	-7.08815	5.95645	BT127_L	BT127	GSC	0.397335	0.330095	0.46947	0.311806	0.507378
BTSC_BT127_L_TCGGGACAGGGTATCG	-9.90869	12.2738	BT127_L	BT127	GSC	0.342481	0.210373	0.46989	0.36076	0.372944
BTSC_BT127_L_TCGGGACCACACATGT	1.21178	12.5639	BT127_L	BT127	GSC	0.379869	0.282484	0.371711	0.325573	0.354973
BTSC_BT127_L_TCGGGACGTATCGCAT	-13.1312	-4.40889	BT127_L	BT127	GSC	0.287336	0.182211	0.42322	0.497892	0.138251
BTSC_BT127_L_TCGGGACTCATAAAGG	-10.4866	9.54982	BT127_L	BT127	GSC	0.336779	0.237244	0.378923	0.41134	0.384163
BTSC_BT127_L_TCGGGACTCCTTAATC	0.791043	18.7401	BT127_L	BT127	GSC	0.441363	0.176497	0.442606	0.422478	0.276186
BTSC_BT127_L_TCGGTAACATGGGACA	-8.22194	7.52114	BT127_L	BT127	GSC	0.405804	0.265578	0.408286	0.388814	0.560931
BTSC_BT127_L_TCGTACCGTCCGAACC	0.395719	13.2197	BT127_L	BT127	GSC	0.349016	0.319767	0.377907	0.464077	0.510139
BTSC_BT127_L_TCGTAGACAAACCTAC	1.91229	14.5305	BT127_L	BT127	GSC	0.425201	0.286088	0.42204	0.395095	0.392234
BTSC_BT127_L_TCGTAGACATATGCTG	-19.2007	-8.17926	BT127_L	BT127	GSC	0.308429	0.182754	0.500037	0.392691	0.475053
BTSC_BT127_L_TCGTAGATCGGAGGTA	-13.8139	3.65834	BT127_L	BT127	GSC	0.383159	0.268432	0.382679	0.438534	0.488453
BTSC_BT127_L_TCTATTGAGATATACG	-13.2859	13.1166	BT127_L	BT127	GSC	0.419177	0.156499	0.365099	0.555987	0.328027
BTSC_BT127_L_TCTATTGAGGTGCTAG	-13.9425	3.64152	BT127_L	BT127	GSC	0.331614	0.240684	0.46646	0.359804	0.293282
BTSC_BT127_L_TCTATTGGTCGTCTTC	2.35828	10.1308	BT127_L	BT127	GSC	0.341106	0.308128	0.485725	0.455656	0.528112
BTSC_BT127_L_TCTCATAAGGAGTCTG	-11.4242	10.4304	BT127_L	BT127	GSC	0.384467	0.220985	0.397251	0.397812	0.331593
BTSC_BT127_L_TCTCATATCTGCTTGC	-4.72464	7.49614	BT127_L	BT127	GSC	0.365495	0.357222	0.382254	0.391044	0.512172
BTSC_BT127_L_TCTCTAAAGATGTGTA	-4.59478	15.654	BT127_L	BT127	GSC	0.411745	0.211263	0.389933	0.577036	0.289532
BTSC_BT127_L_TCTCTAAAGGCTCATT	-14.2857	12.8973	BT127_L	BT127	GSC	0.366067	0.225924	0.412712	0.457657	0.495951
BTSC_BT127_L_TCTCTAAAGGTGACCA	-9.57025	12.5755	BT127_L	BT127	GSC	0.451279	0.249014	0.404192	0.37615	0.513673
BTSC_BT127_L_TCTCTAACAATGGTCT	-0.953003	16.6041	BT127_L	BT127	GSC	0.46452	0.255861	0.397279	0.455143	0.488694
BTSC_BT127_L_TCTCTAACAGCTGTAT	-15.9926	0.714831	BT127_L	BT127	GSC	0.305795	0.264264	0.557084	0.3682	0.161444
BTSC_BT127_L_TCTCTAAGTTTCCACC	-6.67955	8.29117	BT127_L	BT127	GSC	0.340254	0.280022	0.450937	0.203495	0.564752
BTSC_BT127_L_TCTGAGAAGCGCTTAT	-8.50545	15.6575	BT127_L	BT127	GSC	0.441039	0.233116	0.351389	0.588749	0.388523
BTSC_BT127_L_TCTGAGAAGTGCCAGA	-19.7674	10.2347	BT127_L	BT127	GSC	0.396942	0.21655	0.406053	0.425338	0.399565
BTSC_BT127_L_TCTGAGACAGTACACT	-9.74486	11.8255	BT127_L	BT127	GSC	0.491179	0.214252	0.406314	0.355994	0.515742
BTSC_BT127_L_TCTGAGATCTACTCAT	1.44835	7.71392	BT127_L	BT127	GSC	0.359751	0.329554	0.372307	0.36363	0.35859
BTSC_BT127_L_TCTGAGATCTGTTTGT	-20.1239	1.00181	BT127_L	BT127	GSC	0.314139	0.221837	0.366611	0.314696	0.427073
BTSC_BT127_L_TCTGGAAAGTGTCTCA	-9.07908	12.2986	BT127_L	BT127	GSC	0.423706	0.225147	0.416257	0.459067	0.352936
BTSC_BT127_L_TCTGGAACACTAAGTC	-14.791	9.12449	BT127_L	BT127	GSC	0.401715	0.244647	0.496278	0.275342	0.363379
BTSC_BT127_L_TCTGGAAGTACCGGCT	-19.1961	10.0133	BT127_L	BT127	GSC	0.352902	0.234402	0.417181	0.383984	0.28282
BTSC_BT127_L_TCTGGAATCCATGAAC	-17.335	17.7539	BT127_L	BT127	GSC	0.393957	0.19213	0.387809	0.571735	0.376893
BTSC_BT127_L_TCTTCGGAGCGCTCCA	-7.89621	12.0036	BT127_L	BT127	GSC	0.306972	0.274521	0.506431	0.319931	0.182757
BTSC_BT127_L_TCTTCGGCACAGGAGT	-3.4601	7.47309	BT127_L	BT127	GSC	0.38086	0.289571	0.602562	0.454626	0.400682
BTSC_BT127_L_TCTTCGGCAGCGATCC	-18.8724	8.02385	BT127_L	BT127	GSC	0.369535	0.259271	0.389679	0.45152	0.463279
BTSC_BT127_L_TCTTTCCAGAGGACGG	-8.16672	2.99859	BT127_L	BT127	GSC	0.384944	0.412272	0.437944	0.274103	0.565031
BTSC_BT127_L_TCTTTCCTCGCCGTGA	-17.8154	-4.95278	BT127_L	BT127	GSC	0.304989	0.203667	0.434771	0.35054	0.299662
BTSC_BT127_L_TGAAAGAAGCACAGGT	-6.17867	12.0856	BT127_L	BT127	GSC	0.39897	0.158877	0.33446	0.438498	0.3467
BTSC_BT127_L_TGAAAGAAGTTACGGG	-0.97256	7.21644	BT127_L	BT127	GSC	0.408186	0.284876	0.457138	0.302065	0.337144
BTSC_BT127_L_TGAAAGAGTAACGTTC	-9.72799	13.0374	BT127_L	BT127	GSC	0.344903	0.213411	0.420756	0.381192	0.435641
BTSC_BT127_L_TGAAAGAGTTGGTTTG	3.42515	18.2827	BT127_L	BT127	GSC	0.395687	0.296549	0.412897	0.345063	0.307484
BTSC_BT127_L_TGACAACAGGATCGCA	-3.93358	7.30711	BT127_L	BT127	GSC	0.365515	0.265792	0.318629	0.358573	0.434604
BTSC_BT127_L_TGACAACAGGGTGTGT	-11.1481	9.48065	BT127_L	BT127	GSC	0.364233	0.291907	0.470263	0.255293	0.529929
BTSC_BT127_L_TGACAACAGTTGAGAT	3.72364	20.8835	BT127_L	BT127	GSC	0.510505	0.256313	0.384044	0.435801	0.5861
BTSC_BT127_L_TGACGGCCACATCCAA	-11.5699	8.44134	BT127_L	BT127	GSC	0.52449	0.152383	0.364055	0.522173	0.243647
BTSC_BT127_L_TGACGGCGTACGCACC	-8.15485	9.82463	BT127_L	BT127	GSC	0.428013	0.208575	0.370081	0.472396	0.370315
BTSC_BT127_L_TGACGGCTCGTCTGAA	-8.90354	13.8108	BT127_L	BT127	GSC	0.447938	0.236893	0.367531	0.392565	0.4194
BTSC_BT127_L_TGACTTTAGCGTTTAC	-15.5569	13.5745	BT127_L	BT127	GSC	0.335901	0.295053	0.449753	0.517401	0.457188
BTSC_BT127_L_TGACTTTGTAGGACAC	-11.4238	-1.23415	BT127_L	BT127	GSC	0.271951	0.20242	0.412642	0.463891	0.237144
BTSC_BT127_L_TGAGAGGCACAGGAGT	-19.836	3.92557	BT127_L	BT127	GSC	0.359139	0.297899	0.512189	0.256393	0.397051
BTSC_BT127_L_TGAGAGGCACTTACGA	-13.3504	3.99573	BT127_L	BT127	GSC	0.700037	0.381783	0.501443	0.351925	0.663302
BTSC_BT127_L_TGAGAGGGTCAAAGCG	-16.3847	14.8131	BT127_L	BT127	GSC	0.459139	0.229847	0.468615	0.401676	0.614001
BTSC_BT127_L_TGAGAGGTCCACGTTC	-12.5286	-1.55172	BT127_L	BT127	GSC	0.283645	0.196378	0.462499	0.42631	0.184116
BTSC_BT127_L_TGAGAGGTCTGCGGCA	-10.5236	9.96123	BT127_L	BT127	GSC	0.363977	0.304529	0.485459	0.493405	0.413212
BTSC_BT127_L_TGAGCATGTCGACTGC	-16.8299	7.32422	BT127_L	BT127	GSC	0.463557	0.220913	0.428544	0.481633	0.456015
BTSC_BT127_L_TGAGCATTCGTCTGCT	-11.5468	4.61159	BT127_L	BT127	GSC	0.326846	0.213205	0.479731	0.34829	0.382514
BTSC_BT127_L_TGAGCCGCAATAAGCA	-11.4669	11.4365	BT127_L	BT127	GSC	0.604081	0.226572	0.354432	0.385174	0.756868
BTSC_BT127_L_TGAGCCGCATACCATG	-1.39936	18.3035	BT127_L	BT127	GSC	0.462164	0.20147	0.380367	0.508601	0.384837
BTSC_BT127_L_TGAGGGAAGTCACGCC	-10.9149	13.4431	BT127_L	BT127	GSC	0.310616	0.221493	0.383163	0.543879	0.341676
BTSC_BT127_L_TGAGGGAGTGTGTGCC	-19.9531	-5.66353	BT127_L	BT127	GSC	0.315907	0.178223	0.404992	0.400686	0.248038
BTSC_BT127_L_TGATTTCAGGTGCTAG	-6.30442	10.9168	BT127_L	BT127	GSC	0.499941	0.335408	0.357122	0.32177	0.617207
BTSC_BT127_L_TGATTTCTCCGCATCT	-7.20709	16.3231	BT127_L	BT127	GSC	0.355806	0.281187	0.355683	0.346456	0.428206
BTSC_BT127_L_TGCACCTGTATAGTAG	-8.17313	8.68163	BT127_L	BT127	GSC	0.376121	0.178827	0.474115	0.332028	0.467751
BTSC_BT127_L_TGCACCTTCTCTAGGA	-19.1084	2.61304	BT127_L	BT127	GSC	0.345786	0.266345	0.396776	0.478426	0.391199
BTSC_BT127_L_TGCCAAAAGTCATGCT	-18.3891	-15.3	BT127_L	BT127	GSC	0.281317	0.210394	0.429279	0.36057	0.248168
BTSC_BT127_L_TGCCAAACACGCGAAA	-14.9098	5.86425	BT127_L	BT127	GSC	0.386722	0.258849	0.46822	0.440363	0.3624
BTSC_BT127_L_TGCCAAACATTTCACT	-17.053	-8.08862	BT127_L	BT127	GSC	0.314238	0.175531	0.421353	0.356615	0.1785
BTSC_BT127_L_TGCCAAAGTACCTACA	-18.5215	19.4574	BT127_L	BT127	GSC	0.366969	0.220977	0.50805	0.481377	0.328004
BTSC_BT127_L_TGCCAAAGTAGAGGAA	-8.7005	12.3604	BT127_L	BT127	GSC	0.441866	0.286226	0.48444	0.290726	0.55682
BTSC_BT127_L_TGCCAAAGTCTAGCGC	-13.6888	0.419071	BT127_L	BT127	GSC	0.422547	0.317626	0.374727	0.15627	0.402914
BTSC_BT127_L_TGCCAAATCGGAGGTA	-19.3683	-8.42433	BT127_L	BT127	GSC	0.304403	0.169048	0.413293	0.42323	0.291731
BTSC_BT127_L_TGCCCATGTCGCGGTT	-12.7637	17.0171	BT127_L	BT127	GSC	0.504656	0.197972	0.294792	0.31719	0.525794
BTSC_BT127_L_TGCCCATGTGGTACAG	-3.09051	12.3374	BT127_L	BT127	GSC	0.521537	0.276698	0.458404	0.323109	0.625464
BTSC_BT127_L_TGCCCATGTTACGACT	-12.7459	0.749587	BT127_L	BT127	GSC	0.298994	0.194218	0.425399	0.422293	0.250773
BTSC_BT127_L_TGCCCATTCACAACGT	-3.80522	1.51049	BT127_L	BT127	GSC	0.281263	0.18881	0.421777	0.484604	0.205026
BTSC_BT127_L_TGCCCATTCAGTCAGT	-5.81293	16.9664	BT127_L	BT127	GSC	0.35212	0.291787	0.368624	0.611517	0.397888
BTSC_BT127_L_TGCCCATTCCTTTCTC	-0.834834	16.5035	BT127_L	BT127	GSC	0.490608	0.208999	0.418	0.444359	0.411448
BTSC_BT127_L_TGCCCATTCTGTCTAT	-6.35562	10.972	BT127_L	BT127	GSC	0.331567	0.271816	0.427086	0.352666	0.36572
BTSC_BT127_L_TGCCCTAAGGTGATTA	-16.0705	12.0037	BT127_L	BT127	GSC	0.38615	0.241046	0.422615	0.358049	0.560408
BTSC_BT127_L_TGCCCTACAATCACAC	-8.36011	12.1605	BT127_L	BT127	GSC	0.469316	0.272026	0.310585	0.539026	0.299659
BTSC_BT127_L_TGCCCTAGTCGGCATC	-14.3547	7.9457	BT127_L	BT127	GSC	0.422319	0.19039	0.39643	0.503583	0.359806
BTSC_BT127_L_TGCCCTATCGCGTAGC	-19.2238	8.41515	BT127_L	BT127	GSC	0.381047	0.2071	0.442201	0.415178	0.410776
BTSC_BT127_L_TGCGCAGAGAGTCGGT	-14.0374	3.42475	BT127_L	BT127	GSC	0.324071	0.256683	0.525469	0.3657	0.275239
BTSC_BT127_L_TGCGCAGAGCAGGCTA	-1.89512	-2.495	BT127_L	BT127	GSC	0.254612	0.187172	0.484512	0.4792	0.105277
BTSC_BT127_L_TGCGCAGAGTAGCGGT	-6.97453	20.4372	BT127_L	BT127	GSC	0.426657	0.181204	0.374496	0.514604	0.435096
BTSC_BT127_L_TGCGCAGAGTGGTCCC	-15.2619	13.8325	BT127_L	BT127	GSC	0.400501	0.282422	0.491823	0.421058	0.429311
BTSC_BT127_L_TGCGCAGGTCAACATC	-14.8429	3.88633	BT127_L	BT127	GSC	0.348075	0.248139	0.468791	0.340209	0.377267
BTSC_BT127_L_TGCGGGTAGTACGACG	0.0187586	20.4637	BT127_L	BT127	GSC	0.544888	0.153038	0.366661	0.415743	0.609596
BTSC_BT127_L_TGCGGGTAGTTTAGGA	-17.4732	-10.44	BT127_L	BT127	GSC	0.286121	0.202016	0.430662	0.369711	0.153634
BTSC_BT127_L_TGCGGGTTCTGCTGCT	-21.0971	-1.9538	BT127_L	BT127	GSC	0.315192	0.163113	0.418748	0.411263	0.245198
BTSC_BT127_L_TGCGTGGCAGGCAGTA	-17.8247	11.2759	BT127_L	BT127	GSC	0.38834	0.344082	0.46086	0.286795	0.525908
BTSC_BT127_L_TGCGTGGCAGTGGGAT	-14.2833	11.0401	BT127_L	BT127	GSC	0.322649	0.20029	0.396444	0.437904	0.388843
BTSC_BT127_L_TGCGTGGGTCTGCGGT	-16.0745	-1.32204	BT127_L	BT127	GSC	0.312582	0.178723	0.412556	0.565294	0.328894
BTSC_BT127_L_TGCTACCAGATATGGT	-6.98426	20.6867	BT127_L	BT127	GSC	0.377285	0.195021	0.336075	0.376641	0.590027
BTSC_BT127_L_TGCTACCCAACTGCGC	-15.5101	11.8605	BT127_L	BT127	GSC	0.354228	0.260828	0.357673	0.453394	0.261084
BTSC_BT127_L_TGCTACCTCGGAGGTA	-7.67757	6.47775	BT127_L	BT127	GSC	0.281175	0.277785	0.465348	0.404703	0.275807
BTSC_BT127_L_TGCTGCTAGCTGGAAC	-18.1915	18.2116	BT127_L	BT127	GSC	0.574895	0.23078	0.285216	0.427803	0.679372
BTSC_BT127_L_TGCTGCTCATTGGTAC	-12.5925	16.4146	BT127_L	BT127	GSC	0.410535	0.193372	0.30603	0.495433	0.507191
BTSC_BT127_L_TGGACGCGTCGCGGTT	-7.8443	7.52226	BT127_L	BT127	GSC	0.294167	0.284964	0.438441	0.292646	0.345742
BTSC_BT127_L_TGGACGCGTGGTACAG	0.524172	15.6092	BT127_L	BT127	GSC	0.424492	0.274251	0.450017	0.456571	0.47878
BTSC_BT127_L_TGGCCAGCACGCTTTC	-0.387634	12.6967	BT127_L	BT127	GSC	0.456168	0.293949	0.36827	0.319005	0.647706
BTSC_BT127_L_TGGCCAGTCAAAGTAG	-18.7402	-9.54708	BT127_L	BT127	GSC	0.32165	0.196927	0.399392	0.419656	0.218672
BTSC_BT127_L_TGGCTGGCAGCGAACA	-10.8111	2.32554	BT127_L	BT127	GSC	0.297702	0.331917	0.586926	0.338676	0.38969
BTSC_BT127_L_TGGCTGGTCCGGGTGT	-18.584	-6.97799	BT127_L	BT127	GSC	0.329423	0.166665	0.422559	0.417502	0.199764
BTSC_BT127_L_TGGGCGTAGAGGTAGA	-9.87273	8.19698	BT127_L	BT127	GSC	0.3556	0.199124	0.437343	0.273355	0.356182
BTSC_BT127_L_TGGTTAGCAGCTGTGC	-9.63883	11.9928	BT127_L	BT127	GSC	0.548411	0.28384	0.345858	0.25275	0.598393
BTSC_BT127_L_TGGTTAGCATACTACG	-13.2674	-3.72886	BT127_L	BT127	GSC	0.293418	0.209024	0.4335	0.396484	0.129278
BTSC_BT127_L_TGGTTAGGTCCTGCTT	-9.44034	13.643	BT127_L	BT127	GSC	0.294581	0.231244	0.401188	0.55616	0.457506
BTSC_BT127_L_TGGTTAGTCAGCATGT	-6.32267	10.3475	BT127_L	BT127	GSC	0.42271	0.215135	0.346989	0.312583	0.527274
BTSC_BT127_L_TGGTTAGTCGCGCCAA	-3.58319	23.4977	BT127_L	BT127	GSC	0.381133	0.250123	0.501059	0.421425	0.454897
BTSC_BT127_L_TGGTTAGTCTTTACAC	-9.27884	19.5154	BT127_L	BT127	GSC	0.50898	0.160109	0.387435	0.473598	0.538932
BTSC_BT127_L_TGGTTCCCACATCCAA	-12.2309	15.5854	BT127_L	BT127	GSC	0.477148	0.159985	0.331316	0.486231	0.524658
BTSC_BT127_L_TGGTTCCCAGGCTCAC	-21.9474	19.4381	BT127_L	BT127	GSC	0.49387	0.240974	0.401648	0.500395	0.503072
BTSC_BT127_L_TGGTTCCCAGGTCCAC	-3.06145	7.83264	BT127_L	BT127	GSC	0.494051	0.32477	0.366446	0.373732	0.709284
BTSC_BT127_L_TGGTTCCGTTAAGATG	-14.0551	-7.50317	BT127_L	BT127	GSC	0.305576	0.168586	0.472199	0.367277	0.214235
BTSC_BT127_L_TGGTTCCTCAGCTTAG	-6.45627	20.3018	BT127_L	BT127	GSC	0.370278	0.199741	0.380344	0.468529	0.465089
BTSC_BT127_L_TGTATTCAGTACGATA	-4.22846	4.845	BT127_L	BT127	GSC	0.45883	0.364009	0.46749	0.402296	0.36974
BTSC_BT127_L_TGTATTCGTTGTCTTT	-9.89574	12.5447	BT127_L	BT127	GSC	0.559555	0.279424	0.356264	0.548698	0.838293
BTSC_BT127_L_TGTCCCAAGTCATGCT	-17.5033	3.17742	BT127_L	BT127	GSC	0.321895	0.223348	0.396888	0.39602	0.611699
BTSC_BT127_L_TGTCCCAAGTGGCACA	-9.86886	12.1187	BT127_L	BT127	GSC	0.424062	0.151924	0.395158	0.499396	0.287331
BTSC_BT127_L_TGTCCCACATGGATGG	-16.0372	-5.20686	BT127_L	BT127	GSC	0.30041	0.200002	0.390475	0.407645	0.386282
BTSC_BT127_L_TGTCCCAGTGTTCGAT	-4.82217	7.66285	BT127_L	BT127	GSC	0.38452	0.310688	0.444297	0.362575	0.485298
BTSC_BT127_L_TGTCCCATCAGCAACT	-3.01311	6.50511	BT127_L	BT127	GSC	0.456519	0.415527	0.475389	0.11013	0.440777
BTSC_BT127_L_TGTCCCATCAGTGTTG	-7.46711	16.4632	BT127_L	BT127	GSC	0.530686	0.316441	0.384924	0.362072	0.678336
BTSC_BT127_L_TGTCCCATCCTAGGGC	-14.7359	9.79925	BT127_L	BT127	GSC	0.364361	0.239965	0.385322	0.391642	0.447572
BTSC_BT127_L_TGTGGTAAGTGAAGAG	-11.0744	5.18921	BT127_L	BT127	GSC	0.425937	0.394713	0.508014	0.323955	0.437149
BTSC_BT127_L_TGTGGTACACCAGCAC	-11.2439	18.6458	BT127_L	BT127	GSC	0.4522	0.216018	0.524835	0.372026	0.425263
BTSC_BT127_L_TGTGGTAGTACCGGCT	-13.9925	6.70439	BT127_L	BT127	GSC	0.333338	0.254573	0.541852	0.282875	0.516442
BTSC_BT127_L_TGTGTTTAGACTGTAA	-7.15944	14.9087	BT127_L	BT127	GSC	0.343085	0.277787	0.391414	0.625272	0.401331
BTSC_BT127_L_TGTTCCGAGTAGTGCG	4.67116	10.6507	BT127_L	BT127	GSC	0.290329	0.280628	0.481721	0.355375	0.26914
BTSC_BT127_L_TGTTCCGTCGCCTGAG	-12.4667	7.02684	BT127_L	BT127	GSC	0.334439	0.201874	0.450333	0.401005	0.388588
BTSC_BT127_L_TTAACTCAGGATTCGG	-11.5717	2.26956	BT127_L	BT127	GSC	0.43821	0.428844	0.41753	0.346641	0.525373
BTSC_BT127_L_TTAGGACCATTCCTCG	-12.5411	10.172	BT127_L	BT127	GSC	0.362701	0.29546	0.463512	0.271637	0.458224
BTSC_BT127_L_TTAGGACGTGTATGGG	-16.2309	-4.12279	BT127_L	BT127	GSC	0.314192	0.230515	0.498903	0.376662	0.261746
BTSC_BT127_L_TTAGGACTCCAAAGTC	-12.5802	12.0839	BT127_L	BT127	GSC	0.344575	0.224466	0.470196	0.445138	0.19196
BTSC_BT127_L_TTAGGCAAGATGTAAC	-10.3554	11.5057	BT127_L	BT127	GSC	0.425693	0.249115	0.365728	0.441917	0.196419
BTSC_BT127_L_TTAGGCAAGTGACTCT	-20.1388	8.67616	BT127_L	BT127	GSC	0.415832	0.228911	0.504576	0.347542	0.482902
BTSC_BT127_L_TTAGTTCAGCGTTGCC	2.41633	10.9304	BT127_L	BT127	GSC	0.369462	0.232102	0.427982	0.560531	0.389002
BTSC_BT127_L_TTAGTTCCAACTGGCC	-15.7673	-1.58714	BT127_L	BT127	GSC	0.308303	0.171376	0.417705	0.454763	0.229153
BTSC_BT127_L_TTAGTTCTCACCTCGT	-18.178	16.8173	BT127_L	BT127	GSC	0.397915	0.24533	0.271875	0.457974	0.549961
BTSC_BT127_L_TTAGTTCTCGTACCGG	-10.529	9.82615	BT127_L	BT127	GSC	0.328942	0.219222	0.496876	0.489246	0.410119
BTSC_BT127_L_TTAGTTCTCTATGTGG	-16.795	0.510084	BT127_L	BT127	GSC	0.345722	0.229011	0.465667	0.340227	0.228396
BTSC_BT127_L_TTATGCTCAACACCCG	-13.6453	17.9155	BT127_L	BT127	GSC	0.419409	0.22938	0.290162	0.529045	0.387121
BTSC_BT127_L_TTATGCTCACTGTTAG	-5.38818	13.5171	BT127_L	BT127	GSC	0.450788	0.273923	0.413314	0.446932	0.424279
BTSC_BT127_L_TTATGCTTCACCTTAT	-11.9943	1.97717	BT127_L	BT127	GSC	0.494667	0.35108	0.400584	0.158245	0.694578
BTSC_BT127_L_TTCCCAGCAAATTGCC	-2.78523	14.7351	BT127_L	BT127	GSC	0.489327	0.264898	0.495846	0.503141	0.519116
BTSC_BT127_L_TTCCCAGCACCGTTGG	-5.24918	16.2843	BT127_L	BT127	GSC	0.489342	0.163444	0.367722	0.479681	0.452682
BTSC_BT127_L_TTCCCAGCATAGAAAC	-14.2691	5.50671	BT127_L	BT127	GSC	0.341237	0.211979	0.514472	0.352572	0.22705
BTSC_BT127_L_TTCGAAGAGGTGCAAC	-0.440252	11.8024	BT127_L	BT127	GSC	0.452989	0.312923	0.400722	0.427471	0.441999
BTSC_BT127_L_TTCGAAGCAGATTGCT	-11.8366	12.5022	BT127_L	BT127	GSC	0.47227	0.211354	0.454834	0.478391	0.54572
BTSC_BT127_L_TTCGAAGGTCGAGATG	-3.62749	14.2562	BT127_L	BT127	GSC	0.415555	0.212747	0.44512	0.509461	0.361348
BTSC_BT127_L_TTCGAAGGTGCCTGTG	-3.745	9.26022	BT127_L	BT127	GSC	0.389679	0.273553	0.414645	0.379166	0.545699
BTSC_BT127_L_TTCGAAGTCTGTACGA	-8.15248	10.323	BT127_L	BT127	GSC	0.361515	0.28723	0.403468	0.36174	0.35318
BTSC_BT127_L_TTCGGTCCATTTGCTT	-9.15511	9.57075	BT127_L	BT127	GSC	0.343591	0.217703	0.413676	0.36704	0.345055
BTSC_BT127_L_TTCGGTCGTAGCTCCG	-5.33045	-1.96695	BT127_L	BT127	GSC	0.237412	0.187651	0.484989	0.419876	0.247154
BTSC_BT127_L_TTCGGTCGTGTGAATA	-11.4077	7.93454	BT127_L	BT127	GSC	0.433405	0.292243	0.514928	0.235171	0.575816
BTSC_BT127_L_TTCGGTCGTTCCGGCA	-15.2518	0.314897	BT127_L	BT127	GSC	0.301426	0.192142	0.397995	0.479926	0.326347
BTSC_BT127_L_TTCGGTCTCCGCATAA	-2.35972	9.75287	BT127_L	BT127	GSC	0.368747	0.305004	0.540103	0.453913	0.419685
BTSC_BT127_L_TTCGGTCTCCTGCAGG	-9.48949	11.2427	BT127_L	BT127	GSC	0.49704	0.279233	0.438266	0.291151	0.492568
BTSC_BT127_L_TTCTACAAGCTGAAAT	-19.3715	9.06798	BT127_L	BT127	GSC	0.385314	0.193506	0.511256	0.450834	0.374028
BTSC_BT127_L_TTCTACACAACACCTA	-9.97568	2.45835	BT127_L	BT127	GSC	0.337195	0.158193	0.402206	0.39975	0.16706
BTSC_BT127_L_TTCTACACAATCAGAA	-15.6251	4.19774	BT127_L	BT127	GSC	0.360161	0.189171	0.460013	0.408901	0.32419
BTSC_BT127_L_TTCTACAGTCAAAGAT	-7.10991	16.6279	BT127_L	BT127	GSC	0.527798	0.267888	0.233168	0.342559	0.706667
BTSC_BT127_L_TTCTACAGTCCAGTGC	-22.3398	-11.5636	BT127_L	BT127	GSC	0.327646	0.17553	0.376531	0.428124	0.2567
BTSC_BT127_L_TTCTACATCCTTTCTC	-13.4443	-0.680159	BT127_L	BT127	GSC	0.330255	0.169444	0.431536	0.389997	0.30461
BTSC_BT127_L_TTCTACATCGTAGATC	-1.1834	22.8517	BT127_L	BT127	GSC	0.583061	0.172586	0.391408	0.577891	0.505203
BTSC_BT127_L_TTCTCAAAGATGCCTT	-3.61189	11.8653	BT127_L	BT127	GSC	0.357181	0.30377	0.40152	0.453704	0.666514
BTSC_BT127_L_TTCTCAAGTGTTGGGA	2.17752	8.40285	BT127_L	BT127	GSC	0.316806	0.431019	0.472208	0.336279	0.621429
BTSC_BT127_L_TTCTCCTCAAGCGCTC	-6.89396	18.0075	BT127_L	BT127	GSC	0.362771	0.22371	0.459754	0.486893	0.284035
BTSC_BT127_L_TTCTCCTCAATGGACG	-8.06019	9.96834	BT127_L	BT127	GSC	0.399033	0.268272	0.480089	0.276057	0.343074
BTSC_BT127_L_TTCTCCTCAGATCGGA	-10.3769	8.22224	BT127_L	BT127	GSC	0.430698	0.254314	0.314956	0.368655	0.520246
BTSC_BT127_L_TTCTCCTGTCATCGGC	-0.524194	10.6668	BT127_L	BT127	GSC	0.359305	0.268266	0.385727	0.420896	0.509612
BTSC_BT127_L_TTCTCCTGTTCCGTCT	-19.871	-3.65989	BT127_L	BT127	GSC	0.337367	0.170849	0.430484	0.404072	0.270814
BTSC_BT127_L_TTCTCCTTCCTCCTAG	-18.426	12.3631	BT127_L	BT127	GSC	0.439375	0.168599	0.384477	0.339016	0.424459
BTSC_BT127_L_TTCTTAGTCATGTCTT	-18.0865	-12.8471	BT127_L	BT127	GSC	0.274041	0.257688	0.481838	0.336024	0.248455
BTSC_BT127_L_TTGAACGAGTACGTAA	-13.4934	11.0911	BT127_L	BT127	GSC	0.370851	0.202156	0.484919	0.379275	0.182977
BTSC_BT127_L_TTGAACGCATTATCTC	-15.2624	11.3752	BT127_L	BT127	GSC	0.344357	0.260121	0.474593	0.465854	0.378892
BTSC_BT127_L_TTGAACGGTCAGGACA	-15.9435	6.67997	BT127_L	BT127	GSC	0.382463	0.220286	0.381706	0.380713	0.453389
BTSC_BT127_L_TTGAACGTCGAATCCA	-21.8246	18.5998	BT127_L	BT127	GSC	0.412765	0.262183	0.336792	0.458494	0.510857
BTSC_BT127_L_TTGCGTCAGCTAGTTC	-6.02	7.42966	BT127_L	BT127	GSC	0.40368	0.314796	0.42554	0.356878	0.395848
BTSC_BT127_L_TTGCGTCAGGTGATTA	-9.94956	12.0717	BT127_L	BT127	GSC	0.522861	0.255355	0.371621	0.47812	0.625419
BTSC_BT127_L_TTGCGTCAGTAACCCT	-7.505	3.47686	BT127_L	BT127	GSC	0.445623	0.377261	0.539343	0.356464	0.35716
BTSC_BT127_L_TTGGAACAGAGCCTAG	-9.48608	-8.38491	BT127_L	BT127	GSC	0.27337	0.201948	0.458893	0.433348	0.287333
BTSC_BT127_L_TTGGAACTCCGAATGT	-6.01687	7.10922	BT127_L	BT127	GSC	0.433315	0.266145	0.53714	0.322352	0.49247
BTSC_BT127_L_TTGGCAAAGAATGTTG	-12.5801	12.472	BT127_L	BT127	GSC	0.377408	0.202974	0.417952	0.467502	0.222827
BTSC_BT127_L_TTGGCAAAGCGATTCT	-11.2505	12.6726	BT127_L	BT127	GSC	0.345141	0.240599	0.44549	0.613252	0.38091
BTSC_BT127_L_TTGGCAACAGATCCAT	-11.6703	0.723929	BT127_L	BT127	GSC	0.287322	0.184231	0.427285	0.457024	0.261603
BTSC_BT127_L_TTGTAGGAGACCTAGG	-1.82498	11.2537	BT127_L	BT127	GSC	0.40508	0.22762	0.396619	0.427469	0.432142
BTSC_BT127_L_TTGTAGGAGATGTAAC	-3.5837	15.025	BT127_L	BT127	GSC	0.425662	0.231481	0.280516	0.461103	0.52196
BTSC_BT127_L_TTGTAGGAGGGCTCTC	-0.120561	6.81753	BT127_L	BT127	GSC	0.406008	0.310329	0.398666	0.424445	0.465186
BTSC_BT127_L_TTGTAGGCAGATGGGT	-11.9592	8.10156	BT127_L	BT127	GSC	0.624216	0.301269	0.404726	0.48538	0.650838
BTSC_BT127_L_TTGTAGGTCAACTCTT	-16.7842	-6.71144	BT127_L	BT127	GSC	0.318431	0.182975	0.402165	0.421482	0.182978
BTSC_BT127_L_TTTACTGAGTTATCGC	-15.3662	6.13405	BT127_L	BT127	GSC	0.310391	0.229867	0.430206	0.389593	0.345985
BTSC_BT127_L_TTTACTGGTGGAAAGA	-4.99882	8.49177	BT127_L	BT127	GSC	0.354159	0.274777	0.4795	0.396858	0.342794
BTSC_BT127_L_TTTACTGTCACCATAG	-4.97486	11.1875	BT127_L	BT127	GSC	0.418224	0.281299	0.465628	0.363979	0.487088
BTSC_BT127_L_TTTATGCCAGAGTGTG	-13.0406	2.44934	BT127_L	BT127	GSC	0.335996	0.209539	0.442636	0.323128	0.459039
BTSC_BT127_L_TTTATGCGTAGAGCTG	2.35443	13.1735	BT127_L	BT127	GSC	0.409795	0.348847	0.498919	0.430225	0.532849
BTSC_BT127_L_TTTATGCGTTCAGTAC	-4.48016	9.05957	BT127_L	BT127	GSC	0.363906	0.290073	0.412764	0.326017	0.416885
BTSC_BT127_L_TTTATGCTCGAACGGA	-15.8529	3.69159	BT127_L	BT127	GSC	0.376862	0.220983	0.330462	0.39717	0.409098
BTSC_BT127_L_TTTCCTCAGGGAACGG	-4.93897	6.57772	BT127_L	BT127	GSC	0.318231	0.337058	0.450627	0.478267	0.535291
BTSC_BT127_L_TTTCCTCAGGGTTCCC	-6.96777	10.8201	BT127_L	BT127	GSC	0.340695	0.231401	0.521405	0.554526	0.244752
BTSC_BT127_L_TTTCCTCTCACATACG	-15.5208	-11.1985	BT127_L	BT127	GSC	0.291533	0.196487	0.420516	0.425104	0.231193
BTSC_BT127_L_TTTCCTCTCTCGCTTG	-5.8435	1.65464	BT127_L	BT127	GSC	0.234569	0.173562	0.378973	0.546487	0.26037
BTSC_BT127_L_TTTGCGCAGTACCGGA	-5.90162	11.1288	BT127_L	BT127	GSC	0.373292	0.333378	0.446685	0.528965	0.455994
BTSC_BT127_L_TTTGCGCCACTTCTGC	-1.74903	13.1739	BT127_L	BT127	GSC	0.481723	0.279793	0.396592	0.3185	0.553011
BTSC_BT127_L_TTTGCGCGTAAACACA	-15.2085	-3.5675	BT127_L	BT127	GSC	0.341645	0.182153	0.417103	0.420967	0.280367
BTSC_BT127_L_TTTGCGCTCACAGTAC	-9.03443	15.474	BT127_L	BT127	GSC	0.338901	0.249194	0.460524	0.42643	0.387649
BTSC_BT127_L_TTTGGTTAGAGCCTAG	-3.17448	8.25978	BT127_L	BT127	GSC	0.412552	0.263912	0.457588	0.321785	0.477647
BTSC_BT127_L_TTTGGTTAGCCGATTT	-4.79291	9.74607	BT127_L	BT127	GSC	0.400769	0.216418	0.351668	0.437893	0.280417
BTSC_BT127_L_TTTGGTTAGCTGCAAG	-15.2098	15.0981	BT127_L	BT127	GSC	0.528488	0.175197	0.370474	0.561312	0.616069
BTSC_BT127_L_TTTGGTTTCTACTATC	-10.7453	14.8835	BT127_L	BT127	GSC	0.374281	0.227248	0.382727	0.534445	0.384391
BTSC_BT127_L_TTTGTCAAGCTGTTCA	-2.14704	6.90203	BT127_L	BT127	GSC	0.327429	0.219318	0.503895	0.290644	0.219079
BTSC_BT127_L_TTTGTCACATGACATC	-7.39068	9.79837	BT127_L	BT127	GSC	0.392266	0.335963	0.45366	0.335914	0.442134
BTSC_BT127_L_TTTGTCATCCGCATCT	-5.53893	10.4271	BT127_L	BT127	GSC	0.452221	0.321198	0.441908	0.3376	0.377599
BTSC_BT127_L_TTTGTCATCTGCCCTA	3.88956	18.349	BT127_L	BT127	GSC	0.454481	0.225376	0.383079	0.494328	0.401231
BTSC_BT147_L_AAACCTGGTCACTTCC	-13.1195	12.8433	BT147_L	BT147	GSC	0.577073	0.152221	0.136655	0.488201	0.710136
BTSC_BT147_L_AAACCTGTCCAAACAC	-4.7149	9.3667	BT147_L	BT147	GSC	0.704924	0.186448	0.296662	0.437856	0.679544
BTSC_BT147_L_AAACCTGTCCACGTTC	-8.29763	16.8382	BT147_L	BT147	GSC	0.614173	0.162342	0.20393	0.280155	0.67821
BTSC_BT147_L_AAAGATGTCGTAGGTT	4.36989	15.568	BT147_L	BT147	GSC	0.570768	0.239665	0.246489	0.52407	0.616304
BTSC_BT147_L_AAAGCAACATTACGAC	-3.33337	10.597	BT147_L	BT147	GSC	0.553269	0.163485	0.116303	0.424994	0.578987
BTSC_BT147_L_AAAGCAATCAGGCAAG	-1.96504	14.6683	BT147_L	BT147	GSC	0.482866	0.168368	0.240398	0.475154	0.446314
BTSC_BT147_L_AAAGTAGGTTTAGCTG	-9.04054	13.9984	BT147_L	BT147	GSC	0.588254	0.189051	0.21852	0.506267	0.619257
BTSC_BT147_L_AAATGCCAGATCCCGC	-21.5948	-8.13052	BT147_L	BT147	GSC	0.777067	0.192907	0.234076	0.365622	0.70718
BTSC_BT147_L_AAATGCCCAAGAAAGG	-0.0729756	17.3177	BT147_L	BT147	GSC	0.566713	0.188843	0.310806	0.339032	0.465215
BTSC_BT147_L_AAATGCCCAGTCGATT	8.35931	20.2239	BT147_L	BT147	GSC	0.544067	0.152396	0.17013	0.304682	0.531254
BTSC_BT147_L_AAATGCCTCTAAGCCA	2.11018	14.8662	BT147_L	BT147	GSC	0.641811	0.164	0.240955	0.427461	0.615258
BTSC_BT147_L_AACCATGAGTACGTAA	-2.24068	16.7401	BT147_L	BT147	GSC	0.611761	0.133757	0.235607	0.497568	0.583341
BTSC_BT147_L_AACCATGGTAAATACG	-2.44964	15.0378	BT147_L	BT147	GSC	0.603828	0.150001	0.102887	0.412856	0.469167
BTSC_BT147_L_AACCATGGTCAAAGAT	-19.2477	17.0793	BT147_L	BT147	GSC	0.580503	0.133276	0.203414	0.533079	0.691207
BTSC_BT147_L_AACCATGGTCGTTGTA	-7.24776	12.9991	BT147_L	BT147	GSC	0.617771	0.14851	0.225454	0.377945	0.489356
BTSC_BT147_L_AACGTTGAGAGTACAT	-14.6839	-3.29753	BT147_L	BT147	GSC	0.805027	0.211643	0.162682	0.172465	0.892802
BTSC_BT147_L_AACGTTGCACAGACTT	3.63724	20.5057	BT147_L	BT147	GSC	0.627797	0.141652	0.256587	0.419463	0.543086
BTSC_BT147_L_AACTCAGCAGACTCGC	-3.2875	14.2493	BT147_L	BT147	GSC	0.556418	0.19674	0.25779	0.514892	0.533592
BTSC_BT147_L_AACTCAGGTCAACATC	-4.46051	7.70269	BT147_L	BT147	GSC	0.469892	0.290575	0.278929	0.317413	0.637574
BTSC_BT147_L_AACTCAGGTGCGAAAC	-10.8821	2.29181	BT147_L	BT147	GSC	0.63949	0.168739	0.21147	0.429777	0.641575
BTSC_BT147_L_AACTCCCAGGCATGTG	-2.87638	8.71253	BT147_L	BT147	GSC	0.580243	0.180007	0.160725	0.208753	0.747843
BTSC_BT147_L_AACTCCCCACACTGCG	-11.4231	12.1679	BT147_L	BT147	GSC	0.577262	0.217556	0.313924	0.389367	0.574945
BTSC_BT147_L_AACTCTTAGGCCGAAT	-12.3029	12.2528	BT147_L	BT147	GSC	0.575025	0.203136	0.246586	0.546681	0.585793
BTSC_BT147_L_AACTCTTTCAAAGTAG	-11.7901	4.88066	BT147_L	BT147	GSC	0.555399	0.196728	0.367157	0.375148	0.686436
BTSC_BT147_L_AACTCTTTCACTTATC	3.19514	13.2532	BT147_L	BT147	GSC	0.515208	0.245976	0.184578	0.247624	0.573692
BTSC_BT147_L_AACTGGTAGATATGCA	-5.79304	13.8335	BT147_L	BT147	GSC	0.544985	0.205081	0.215162	0.39193	0.576124
BTSC_BT147_L_AACTGGTGTGTTCTTT	5.29927	19.1552	BT147_L	BT147	GSC	0.657801	0.164856	0.212701	0.360416	0.55431
BTSC_BT147_L_AACTTTCCACGTCAGC	-6.57324	17.5525	BT147_L	BT147	GSC	0.593597	0.12345	0.201274	0.335907	0.355099
BTSC_BT147_L_AACTTTCTCTACTATC	-6.12193	15.5737	BT147_L	BT147	GSC	0.577756	0.200041	0.213061	0.383417	0.637336
BTSC_BT147_L_AACTTTCTCTGAGTGT	-11.4874	11.8803	BT147_L	BT147	GSC	0.65613	0.137978	0.213456	0.421818	0.609174
BTSC_BT147_L_AAGCCGCCAATGGTCT	0.47317	18.3302	BT147_L	BT147	GSC	0.543959	0.160909	0.26807	0.431073	0.434276
BTSC_BT147_L_AAGCCGCCACACTGCG	-14.3679	17.0975	BT147_L	BT147	GSC	0.604362	0.111677	0.104943	0.591368	0.503143
BTSC_BT147_L_AAGCCGCGTATTAGCC	-1.30849	14.8597	BT147_L	BT147	GSC	0.540413	0.17129	0.198808	0.320637	0.377416
BTSC_BT147_L_AAGCCGCTCCGTACAA	-12.6213	5.7933	BT147_L	BT147	GSC	0.70598	0.131062	0.244719	0.625117	0.690617
BTSC_BT147_L_AAGGAGCCAGACGTAG	2.78776	10.6067	BT147_L	BT147	GSC	0.570755	0.171663	0.214855	0.43517	0.585951
BTSC_BT147_L_AAGGAGCCAGTCACTA	-8.27451	12.0447	BT147_L	BT147	GSC	0.658093	0.167004	0.144131	0.280954	0.607495
BTSC_BT147_L_AAGGAGCGTACAAGTA	2.90304	13.7965	BT147_L	BT147	GSC	0.539097	0.215287	0.245457	0.323833	0.472119
BTSC_BT147_L_AAGGAGCGTATATGAG	-5.47889	11.6035	BT147_L	BT147	GSC	0.660314	0.18388	0.23733	0.422784	0.61211
BTSC_BT147_L_AAGGCAGAGAAACCTA	4.41807	18.8407	BT147_L	BT147	GSC	0.603675	0.171887	0.175562	0.23567	0.533037
BTSC_BT147_L_AAGGCAGCAATGGAAT	-7.50973	11.086	BT147_L	BT147	GSC	0.452072	0.212421	0.244547	0.642174	0.423633
BTSC_BT147_L_AAGGTTCAGATGTTAG	-0.768131	14.6857	BT147_L	BT147	GSC	0.659228	0.14986	0.266843	0.378369	0.627933
BTSC_BT147_L_AAGGTTCCACAAGCCC	-7.28135	12.826	BT147_L	BT147	GSC	0.593186	0.159056	0.156953	0.37725	0.69317
BTSC_BT147_L_AAGGTTCGTCAGCTAT	-2.5071	11.1781	BT147_L	BT147	GSC	0.634225	0.174272	0.183929	0.429395	0.735305
BTSC_BT147_L_AAGTCTGGTGTAACGG	-4.48815	9.92159	BT147_L	BT147	GSC	0.571834	0.194549	0.27846	0.361938	0.602297
BTSC_BT147_L_AATCCAGTCAAGGTAA	-9.67159	15.3967	BT147_L	BT147	GSC	0.586958	0.152314	0.279103	0.35399	0.66861
BTSC_BT147_L_AATCCAGTCTAGCACA	-5.81341	14.7916	BT147_L	BT147	GSC	0.581339	0.153086	0.218775	0.330887	0.695891
BTSC_BT147_L_AATCGGTGTAGTAGTA	0.810729	12.9538	BT147_L	BT147	GSC	0.726668	0.177025	0.304174	0.341292	0.661021
BTSC_BT147_L_AATCGGTTCGCCTGAG	-5.43079	17.5435	BT147_L	BT147	GSC	0.602588	0.136255	0.232729	0.701478	0.590631
BTSC_BT147_L_ACACCAAAGATAGTCA	-9.32736	1.04403	BT147_L	BT147	GSC	0.673833	0.193391	0.253324	0.473907	0.699821
BTSC_BT147_L_ACACCAAAGTATGACA	1.67747	29.2155	BT147_L	BT147	GSC	0.507386	0.17979	0.222906	0.313392	0.525683
BTSC_BT147_L_ACACCAATCGGCGGTT	-9.26023	14.0808	BT147_L	BT147	GSC	0.561459	0.16942	0.297002	0.414086	0.572886
BTSC_BT147_L_ACACCCTAGGAGTCTG	-4.5275	12.3538	BT147_L	BT147	GSC	0.533769	0.213982	0.155767	0.547896	0.548062
BTSC_BT147_L_ACACCCTTCCAAGTAC	-5.70854	8.85089	BT147_L	BT147	GSC	0.550828	0.244769	0.354359	0.185448	0.698737
BTSC_BT147_L_ACACCGGCACAGACTT	-0.925955	14.8889	BT147_L	BT147	GSC	0.549162	0.198753	0.154301	0.347586	0.525105
BTSC_BT147_L_ACACTGAAGAAGGACA	3.34759	20.1617	BT147_L	BT147	GSC	0.57317	0.150394	0.222478	0.483705	0.29155
BTSC_BT147_L_ACACTGAAGCCGTCGT	-13.0931	9.14369	BT147_L	BT147	GSC	0.593677	0.220378	0.15451	0.440388	0.715188
BTSC_BT147_L_ACACTGAAGTGTCTCA	-6.07315	12.0924	BT147_L	BT147	GSC	0.542173	0.201976	0.131708	0.370182	0.607365
BTSC_BT147_L_ACAGCCGGTGGTCCGT	-11.8116	16.4142	BT147_L	BT147	GSC	0.584444	0.0923416	0.148529	0.659033	0.497145
BTSC_BT147_L_ACAGCCGGTTATCCGA	0.265483	9.8847	BT147_L	BT147	GSC	0.562582	0.275569	0.292186	0.340168	0.821963
BTSC_BT147_L_ACAGCTATCAGAGGTG	3.57074	14.1532	BT147_L	BT147	GSC	0.597185	0.168972	0.270054	0.481882	0.492515
BTSC_BT147_L_ACAGCTATCCTGCCAT	1.16346	17.0626	BT147_L	BT147	GSC	0.603822	0.190954	0.294632	0.44637	0.571838
BTSC_BT147_L_ACAGCTATCTTAGAGC	-2.21308	13.2609	BT147_L	BT147	GSC	0.596664	0.251227	0.205512	0.194218	0.680036
BTSC_BT147_L_ACATCAGGTCCATCCT	-8.18303	7.39298	BT147_L	BT147	GSC	0.55599	0.135588	0.285441	0.505778	0.524883
BTSC_BT147_L_ACATGGTGTTCACGGC	-5.44531	11.185	BT147_L	BT147	GSC	0.506985	0.279452	0.306132	0.229842	0.669938
BTSC_BT147_L_ACCAGTACAAGCGTAG	-4.91803	10.696	BT147_L	BT147	GSC	0.431124	0.22355	0.230718	0.580419	0.491811
BTSC_BT147_L_ACCAGTAGTGGGTCAA	-9.04486	12.374	BT147_L	BT147	GSC	0.592218	0.211267	0.191668	0.570205	0.600478
BTSC_BT147_L_ACCCACTTCCCATTTA	-9.91821	-0.854393	BT147_L	BT147	GSC	0.624125	0.339627	0.412555	0.236493	0.715913
BTSC_BT147_L_ACCGTAAGTACAAGTA	-9.67555	12.5967	BT147_L	BT147	GSC	0.515052	0.250856	0.250653	0.342019	0.563932
BTSC_BT147_L_ACCGTAAGTGAGGCTA	-11.5916	9.44754	BT147_L	BT147	GSC	0.650664	0.121028	0.310166	0.488143	0.64961
BTSC_BT147_L_ACCTTTACATCACCCT	-7.58836	13.7381	BT147_L	BT147	GSC	0.436905	0.172239	0.339075	0.545121	0.29557
BTSC_BT147_L_ACCTTTATCGTCCAGG	-1.57704	18.2473	BT147_L	BT147	GSC	0.578362	0.234728	0.331776	0.30531	0.679869
BTSC_BT147_L_ACGAGGAAGTAAGTAC	-2.73848	14.3974	BT147_L	BT147	GSC	0.576869	0.14392	0.117759	0.47616	0.436373
BTSC_BT147_L_ACGATACCAGTAAGAT	-1.02592	12.5869	BT147_L	BT147	GSC	0.607924	0.158952	0.244696	0.445567	0.732585
BTSC_BT147_L_ACGATACTCTACTTAC	1.7459	19.0209	BT147_L	BT147	GSC	0.638745	0.182582	0.222299	0.479959	0.568912
BTSC_BT147_L_ACGATGTTCAGTGCAT	-13.2932	16.8299	BT147_L	BT147	GSC	0.558346	0.138673	0.269857	0.586651	0.469162
BTSC_BT147_L_ACGCAGCAGTTAGGTA	-3.16057	15.0692	BT147_L	BT147	GSC	0.590742	0.0768138	0.25691	0.430214	0.651854
BTSC_BT147_L_ACGCAGCTCGAATCCA	3.21969	15.1043	BT147_L	BT147	GSC	0.624103	0.165651	0.225388	0.474723	0.657823
BTSC_BT147_L_ACGCCAGAGCTAGGCA	-18.5357	7.12707	BT147_L	BT147	GSC	0.616516	0.225626	0.180221	0.21328	0.721788
BTSC_BT147_L_ACGCCAGAGCTGCCCA	-2.46331	10.757	BT147_L	BT147	GSC	0.588812	0.149946	0.263332	0.463904	0.657677
BTSC_BT147_L_ACGCCAGCACAGACAG	-7.68008	4.67314	BT147_L	BT147	GSC	0.570253	0.253468	0.269492	0.388429	0.689218
BTSC_BT147_L_ACGCCAGCATGTTCCC	-11.3419	-0.0460496	BT147_L	BT147	GSC	0.775094	0.176432	0.15024	0.389279	0.768269
BTSC_BT147_L_ACGCCGAGTAAGGGAA	-8.21544	13.9458	BT147_L	BT147	GSC	0.610767	0.210005	0.170747	0.368492	0.474631
BTSC_BT147_L_ACGGAGACACGCCAGT	-5.03459	12.9793	BT147_L	BT147	GSC	0.582425	0.161909	0.234147	0.370341	0.578911
BTSC_BT147_L_ACGGCCACAGATGAGC	-13.0132	15.6167	BT147_L	BT147	GSC	0.645176	0.176171	0.205754	0.382363	0.509585
BTSC_BT147_L_ACGGGCTAGGCGTACA	-3.53396	12.6788	BT147_L	BT147	GSC	0.519594	0.227983	0.239823	0.427209	0.652185
BTSC_BT147_L_ACGGGCTAGGGATCTG	5.63767	16.2434	BT147_L	BT147	GSC	0.602048	0.226005	0.186248	0.333843	0.659448
BTSC_BT147_L_ACGGGCTGTGATGATA	0.642033	13.6024	BT147_L	BT147	GSC	0.585741	0.144353	0.200798	0.510223	0.601491
BTSC_BT147_L_ACGGGTCAGACACTAA	-6.38673	6.22627	BT147_L	BT147	GSC	0.661247	0.260444	0.289139	0.428844	0.624368
BTSC_BT147_L_ACGGGTCAGTACTTGC	4.03279	16.5479	BT147_L	BT147	GSC	0.560158	0.215841	0.312453	0.574206	0.475808
BTSC_BT147_L_ACGGGTCGTCTTCTCG	-12.3088	7.30694	BT147_L	BT147	GSC	0.436571	0.148523	0.327957	0.293212	0.46688
BTSC_BT147_L_ACGGGTCTCATGGTCA	0.0415567	13.123	BT147_L	BT147	GSC	0.545328	0.215742	0.219954	0.363422	0.656266
BTSC_BT147_L_ACGTCAACAAGCCATT	-9.65791	8.86347	BT147_L	BT147	GSC	0.607265	0.17759	0.410513	0.363308	0.518866
BTSC_BT147_L_ACGTCAACACGGCCAT	-6.71062	8.13057	BT147_L	BT147	GSC	0.789299	0.191519	0.227025	0.201031	0.807161
BTSC_BT147_L_ACGTCAAGTCTGCAAT	-6.97325	8.26138	BT147_L	BT147	GSC	0.514457	0.262805	0.268584	0.490065	0.695705
BTSC_BT147_L_ACTATCTTCGCGATCG	-7.65689	16.1639	BT147_L	BT147	GSC	0.57844	0.100026	0.243167	0.490486	0.414292
BTSC_BT147_L_ACTGAACTCCCTTGTG	-8.03726	6.01632	BT147_L	BT147	GSC	0.635342	0.289419	0.220674	0.248671	0.808956
BTSC_BT147_L_ACTGAGTCACTTCGAA	-9.30923	11.0018	BT147_L	BT147	GSC	0.626113	0.193087	0.267803	0.31929	0.594277
BTSC_BT147_L_ACTGATGCACTAGTAC	-2.6101	13.5592	BT147_L	BT147	GSC	0.568796	0.188516	0.323039	0.471167	0.594944
BTSC_BT147_L_ACTGATGCAGACGTAG	-6.9979	10.939	BT147_L	BT147	GSC	0.514129	0.192375	0.228124	0.416272	0.491419
BTSC_BT147_L_ACTGATGCAGATAATG	-0.810236	14.4301	BT147_L	BT147	GSC	0.610175	0.12072	0.182142	0.339616	0.527653
BTSC_BT147_L_ACTTACTAGCGATCCC	-9.84961	12.1822	BT147_L	BT147	GSC	0.603493	0.157795	0.192243	0.431801	0.538776
BTSC_BT147_L_ACTTACTGTTATCACG	-11.826	2.77386	BT147_L	BT147	GSC	0.493765	0.134762	0.2273	0.427409	0.518421
BTSC_BT147_L_ACTTGTTCAATCTACG	-9.06133	13.705	BT147_L	BT147	GSC	0.588621	0.171311	0.375166	0.351316	0.637002
BTSC_BT147_L_ACTTGTTTCCTAAGTG	0.803326	15.6693	BT147_L	BT147	GSC	0.553815	0.220035	0.162347	0.336038	0.435614
BTSC_BT147_L_ACTTTCAAGGCACATG	-10.2752	13.517	BT147_L	BT147	GSC	0.628724	0.211337	0.315311	0.486781	0.821212
BTSC_BT147_L_AGAATAGAGGACAGAA	-15.9716	12.9436	BT147_L	BT147	GSC	0.605118	0.153924	0.14257	0.369504	0.577328
BTSC_BT147_L_AGAATAGCATTCGACA	6.00446	16.8337	BT147_L	BT147	GSC	0.573789	0.167364	0.245913	0.36528	0.527733
BTSC_BT147_L_AGAATAGGTTATTCTC	-0.403673	10.4409	BT147_L	BT147	GSC	0.610238	0.201781	0.157314	0.351603	0.539074
BTSC_BT147_L_AGACGTTAGTAGGTGC	5.91031	22.1056	BT147_L	BT147	GSC	0.585821	0.16957	0.240325	0.406678	0.43893
BTSC_BT147_L_AGAGCGAAGACAAGCC	-5.54993	12.3064	BT147_L	BT147	GSC	0.581516	0.196947	0.278601	0.351063	0.578576
BTSC_BT147_L_AGAGCGAAGAGGTTGC	-9.36438	13.9761	BT147_L	BT147	GSC	0.553676	0.121785	0.251938	0.296596	0.544713
BTSC_BT147_L_AGAGCGATCGTACCGG	-16.0971	3.98755	BT147_L	BT147	GSC	0.744013	0.146208	0.0482268	0.475304	0.764307
BTSC_BT147_L_AGAGTGGGTGGTTTCA	-10.6457	19.7969	BT147_L	BT147	GSC	0.463381	0.108967	0.198485	0.5233	0.634064
BTSC_BT147_L_AGAGTGGTCAGCTCTC	2.58362	16.9766	BT147_L	BT147	GSC	0.603157	0.13414	0.204075	0.268327	0.503201
BTSC_BT147_L_AGAGTGGTCCCTAATT	-8.04691	6.01018	BT147_L	BT147	GSC	0.601238	0.214281	0.269404	0.536398	0.601817
BTSC_BT147_L_AGAGTGGTCGCCAAAT	0.982997	12.9523	BT147_L	BT147	GSC	0.590465	0.147235	0.204174	0.449621	0.763796
BTSC_BT147_L_AGATCTGGTATCAGTC	-11.0618	9.29167	BT147_L	BT147	GSC	0.543133	0.204425	0.289628	0.345824	0.535071
BTSC_BT147_L_AGATCTGTCACCCTCA	-8.41192	7.12205	BT147_L	BT147	GSC	0.570464	0.200008	0.134306	0.37572	0.674897
BTSC_BT147_L_AGATCTGTCGTTGCCT	4.42853	14.4081	BT147_L	BT147	GSC	0.530238	0.214024	0.246236	0.322992	0.732493
BTSC_BT147_L_AGCAGCCAGAGACTAT	-1.41622	9.79338	BT147_L	BT147	GSC	0.652679	0.195023	0.319903	0.362411	0.616593
BTSC_BT147_L_AGCAGCCGTTGTGGCC	-5.26677	15.2851	BT147_L	BT147	GSC	0.617297	0.151854	0.336852	0.51252	0.484445
BTSC_BT147_L_AGCATACAGACTACAA	2.03498	16.8832	BT147_L	BT147	GSC	0.510243	0.176756	0.256054	0.37357	0.370575
BTSC_BT147_L_AGCATACCAAAGGCGT	3.48418	18.9451	BT147_L	BT147	GSC	0.564047	0.120085	0.285411	0.359438	0.495636
BTSC_BT147_L_AGCCTAATCAACCATG	-19.1323	6.40936	BT147_L	BT147	GSC	0.602061	0.137851	0.0867912	0.496716	0.48336
BTSC_BT147_L_AGCGGTCAGTGGAGTC	-14.5139	8.26765	BT147_L	BT147	GSC	0.586401	0.150594	0.238114	0.388413	0.569736
BTSC_BT147_L_AGCGGTCCAGGGTTAG	-10.1756	10.2787	BT147_L	BT147	GSC	0.682559	0.173052	0.225395	0.558604	0.482333
BTSC_BT147_L_AGCGTATCAGTGGAGT	-3.37123	12.3304	BT147_L	BT147	GSC	0.61522	0.13362	0.291923	0.311731	0.659488
BTSC_BT147_L_AGCGTCGTCAACACTG	6.89016	16.5751	BT147_L	BT147	GSC	0.451924	0.187577	0.298709	0.402348	0.281436
BTSC_BT147_L_AGCTCCTAGAATGTTG	-4.2226	11.5662	BT147_L	BT147	GSC	0.577113	0.195056	0.234111	0.352728	0.764362
BTSC_BT147_L_AGCTCCTTCAGTTAGC	-5.79552	13.8803	BT147_L	BT147	GSC	0.526509	0.192472	0.246109	0.497435	0.528987
BTSC_BT147_L_AGCTCTCCATTAACCG	-6.85213	10.64	BT147_L	BT147	GSC	0.593877	0.148739	0.133637	0.444481	0.534056
BTSC_BT147_L_AGCTCTCTCAGCATGT	-4.99725	13.2917	BT147_L	BT147	GSC	0.483114	0.206864	0.305709	0.443453	0.34441
BTSC_BT147_L_AGGCCACGTCAATGTC	2.69192	9.93278	BT147_L	BT147	GSC	0.590272	0.259904	0.184213	0.570327	0.72188
BTSC_BT147_L_AGGCCGTCAATTCCTT	3.97295	21.9052	BT147_L	BT147	GSC	0.568748	0.163797	0.172439	0.589971	0.586573
BTSC_BT147_L_AGGCCGTTCGCCATAA	-8.75949	13.3315	BT147_L	BT147	GSC	0.679372	0.111507	0.258754	0.485593	0.475722
BTSC_BT147_L_AGGCCGTTCTACTCAT	-13.5559	19.5749	BT147_L	BT147	GSC	0.537442	0.250396	0.346152	0.303367	0.540592
BTSC_BT147_L_AGGGATGAGTACACCT	-5.89551	11.9152	BT147_L	BT147	GSC	0.519885	0.201233	0.273651	0.580526	0.489729
BTSC_BT147_L_AGGGATGGTGATAAAC	-8.39238	16.5039	BT147_L	BT147	GSC	0.441534	0.125861	0.160579	0.538371	0.370371
BTSC_BT147_L_AGGTCATAGTGTCTCA	-6.33058	14.3407	BT147_L	BT147	GSC	0.532344	0.202646	0.194191	0.491876	0.453288
BTSC_BT147_L_AGGTCATGTTGAGGTG	-1.67316	17.0428	BT147_L	BT147	GSC	0.672405	0.198168	0.103159	0.468298	0.657388
BTSC_BT147_L_AGGTCCGTCTAACGGT	7.19283	18.6994	BT147_L	BT147	GSC	0.568987	0.153563	0.174087	0.553408	0.543271
BTSC_BT147_L_AGTAGTCAGCCCGAAA	-4.51229	12.4615	BT147_L	BT147	GSC	0.730508	0.135827	0.106916	0.544357	0.79999
BTSC_BT147_L_AGTAGTCCATCATCCC	0.530745	24.5423	BT147_L	BT147	GSC	0.444677	0.222398	0.260875	0.395313	0.600066
BTSC_BT147_L_AGTCTTTTCTGTTGAG	-3.59613	9.95566	BT147_L	BT147	GSC	0.609151	0.189435	0.198644	0.392581	0.654537
BTSC_BT147_L_AGTCTTTTCTGTTTGT	-2.25851	9.74327	BT147_L	BT147	GSC	0.6033	0.215165	0.155128	0.380023	0.65335
BTSC_BT147_L_AGTGAGGGTTATTCTC	6.65396	18.6975	BT147_L	BT147	GSC	0.533346	0.199794	0.158851	0.452712	0.689306
BTSC_BT147_L_AGTGTCACAGGATTGG	-8.59992	5.53577	BT147_L	BT147	GSC	0.55212	0.220316	0.283177	0.225858	0.599468
BTSC_BT147_L_AGTGTCATCGGTTAAC	-6.52109	23.8699	BT147_L	BT147	GSC	0.493565	0.199003	0.326008	0.204121	0.602221
BTSC_BT147_L_AGTGTCATCTGAGTGT	-8.11221	8.24688	BT147_L	BT147	GSC	0.557431	0.177409	0.28216	0.483258	0.530227
BTSC_BT147_L_AGTTGGTTCGCCTGTT	2.28791	14.1068	BT147_L	BT147	GSC	0.590342	0.215233	0.14944	0.422809	0.515197
BTSC_BT147_L_ATAACGCCAAGGTGTG	-7.39607	2.61862	BT147_L	BT147	GSC	0.732744	0.12363	0.148569	0.403263	0.670899
BTSC_BT147_L_ATAACGCTCGACCAGC	-3.69599	9.45664	BT147_L	BT147	GSC	0.645614	0.233979	0.297482	0.333981	0.650098
BTSC_BT147_L_ATAACGCTCGTTACGA	2.3897	16.2445	BT147_L	BT147	GSC	0.543468	0.103507	0.139214	0.524933	0.356061
BTSC_BT147_L_ATAACGCTCTGATACG	3.25519	15.2155	BT147_L	BT147	GSC	0.634856	0.11686	0.275781	0.410288	0.571478
BTSC_BT147_L_ATCACGACAGATCGGA	-7.31729	6.88354	BT147_L	BT147	GSC	0.674375	0.196906	0.238041	0.387059	0.725365
BTSC_BT147_L_ATCACGACAGTATAAG	-6.06572	7.03434	BT147_L	BT147	GSC	0.595963	0.233248	0.268874	0.2607	0.559373
BTSC_BT147_L_ATCACGATCAACTCTT	-5.7555	26.8121	BT147_L	BT147	GSC	0.477318	0.185043	0.255851	0.436296	0.487377
BTSC_BT147_L_ATCACGATCAGCCTAA	-12.2129	10.8834	BT147_L	BT147	GSC	0.615067	0.141712	0.0540788	0.455185	0.508338
BTSC_BT147_L_ATCATCTCACGGCGTT	-3.52621	13.9848	BT147_L	BT147	GSC	0.460264	0.206235	0.244949	0.577047	0.421435
BTSC_BT147_L_ATCATCTCATTGCGGC	-17.579	10.0742	BT147_L	BT147	GSC	0.578489	0.193043	0.125007	0.492307	0.470405
BTSC_BT147_L_ATCATGGGTCCGTGAC	-3.31955	9.61675	BT147_L	BT147	GSC	0.522144	0.160274	0.286981	0.59042	0.434856
BTSC_BT147_L_ATCATGGGTCTGCCAG	0.37024	12.1945	BT147_L	BT147	GSC	0.507792	0.219622	0.200425	0.280746	0.515418
BTSC_BT147_L_ATCCGAAAGCCCTAAT	7.63278	17.5338	BT147_L	BT147	GSC	0.540566	0.2271	0.243191	0.311575	0.583617
BTSC_BT147_L_ATCCGAAGTTAAGGGC	0.24763	12.7006	BT147_L	BT147	GSC	0.554634	0.247848	0.253365	0.472176	0.493886
BTSC_BT147_L_ATCGAGTCAAGCCGCT	-20.2644	-4.32211	BT147_L	BT147	GSC	0.849827	0.100487	0.0421024	0.456831	0.800026
BTSC_BT147_L_ATCTACTAGATCTGCT	-12.3061	1.44796	BT147_L	BT147	GSC	0.711146	0.154823	0.109741	0.330675	0.658529
BTSC_BT147_L_ATCTACTAGCACGCCT	-11.6565	10.5514	BT147_L	BT147	GSC	0.525265	0.116643	0.31944	0.565011	0.574618
BTSC_BT147_L_ATGAGGGGTCAAACTC	-0.605035	15.0644	BT147_L	BT147	GSC	0.559556	0.179377	0.173741	0.388834	0.561969
BTSC_BT147_L_ATGAGGGGTGGCTCCA	-3.77419	12.7138	BT147_L	BT147	GSC	0.574999	0.140188	0.187252	0.485378	0.510531
BTSC_BT147_L_ATGCGATGTGAGCGAT	7.97638	21.4958	BT147_L	BT147	GSC	0.569082	0.152817	0.1562	0.503638	0.539821
BTSC_BT147_L_ATGGGAGCACACTGCG	-11.2387	5.18142	BT147_L	BT147	GSC	0.653261	0.137861	0.269939	0.432275	0.649156
BTSC_BT147_L_ATTACTCAGAATCTCC	-11.5048	9.58404	BT147_L	BT147	GSC	0.618755	0.189785	0.15947	0.269148	0.77688
BTSC_BT147_L_ATTACTCAGGTGATTA	-7.58946	12.438	BT147_L	BT147	GSC	0.544206	0.206454	0.342595	0.336615	0.653295
BTSC_BT147_L_ATTACTCGTATTACCG	-2.60637	14.0999	BT147_L	BT147	GSC	0.540524	0.237323	0.275354	0.440417	0.46282
BTSC_BT147_L_ATTACTCTCAACGCTA	-3.46194	8.08621	BT147_L	BT147	GSC	0.685353	0.20584	0.263664	0.402338	0.60537
BTSC_BT147_L_ATTATCCAGCGATGAC	3.51774	21.8536	BT147_L	BT147	GSC	0.570986	0.153645	0.227089	0.429247	0.637347
BTSC_BT147_L_ATTATCCAGCTAGCCC	-3.43028	12.1717	BT147_L	BT147	GSC	0.590729	0.231401	0.425893	0.271541	0.694187
BTSC_BT147_L_ATTATCCTCCGCTGTT	-7.06346	20.118	BT147_L	BT147	GSC	0.510489	0.106113	0.265208	0.594689	0.484643
BTSC_BT147_L_ATTCTACTCCACTGGG	-20.4887	-5.25513	BT147_L	BT147	GSC	0.824047	0.140074	0.0972813	0.351643	0.781325
BTSC_BT147_L_ATTGGACAGCGACGTA	-4.57862	12.2071	BT147_L	BT147	GSC	0.607987	0.154663	0.338398	0.380457	0.56566
BTSC_BT147_L_ATTGGACCACCTCGGA	-14.9256	12.4629	BT147_L	BT147	GSC	0.645169	0.167851	0.210463	0.405895	0.560308
BTSC_BT147_L_ATTGGTGGTAGGAGTC	-18.7643	8.30533	BT147_L	BT147	GSC	0.685697	0.172128	0.142482	0.331418	0.640201
BTSC_BT147_L_ATTTCTGGTGTGCCTG	-8.25418	10.0483	BT147_L	BT147	GSC	0.641301	0.18306	0.200897	0.562156	0.535001
BTSC_BT147_L_CAACCAAGTCCCTTGT	0.303526	15.3469	BT147_L	BT147	GSC	0.594599	0.193725	0.340459	0.38516	0.585434
BTSC_BT147_L_CAACCTCTCCTGCCAT	-2.40568	17.4485	BT147_L	BT147	GSC	0.628387	0.127522	0.133841	0.45985	0.475368
BTSC_BT147_L_CAACTAGAGGGTTCCC	-1.61214	12.5029	BT147_L	BT147	GSC	0.597423	0.232986	0.2179	0.341234	0.540738
BTSC_BT147_L_CAACTAGGTCAGCTAT	-15.5769	13.5003	BT147_L	BT147	GSC	0.58469	0.106454	0.20209	0.30083	0.660578
BTSC_BT147_L_CAAGAAACACAGGAGT	-4.77568	12.7724	BT147_L	BT147	GSC	0.563935	0.217367	0.17728	0.322118	0.435577
BTSC_BT147_L_CAAGAAACATACTACG	-17.1495	3.58165	BT147_L	BT147	GSC	0.757196	0.139898	0.0700205	0.309913	0.713781
BTSC_BT147_L_CAAGATCCACTTAAGC	5.42766	16.1748	BT147_L	BT147	GSC	0.602506	0.0885865	0.248172	0.40713	0.577679
BTSC_BT147_L_CAAGGCCAGGAGTTGC	-6.22225	6.41017	BT147_L	BT147	GSC	0.565704	0.287919	0.406795	0.242596	0.690046
BTSC_BT147_L_CAAGGCCAGTCCGGTC	4.48139	13.5217	BT147_L	BT147	GSC	0.5792	0.178616	0.251075	0.494333	0.481919
BTSC_BT147_L_CACAAACAGGCCCGTT	-16.0475	3.17133	BT147_L	BT147	GSC	0.753174	0.146417	0.0984714	0.343552	0.843461
BTSC_BT147_L_CACAAACGTAATCGTC	-12.1039	6.52116	BT147_L	BT147	GSC	0.60719	0.12298	0.372538	0.429015	0.529152
BTSC_BT147_L_CACAAACTCGGTTAAC	-1.78442	9.84618	BT147_L	BT147	GSC	0.574987	0.186028	0.125875	0.333485	0.638205
BTSC_BT147_L_CACACAACACTCGACG	2.1966	19.1503	BT147_L	BT147	GSC	0.598427	0.118346	0.15385	0.457091	0.467043
BTSC_BT147_L_CACACAAGTAGGGACT	-4.54364	13.9709	BT147_L	BT147	GSC	0.535445	0.224392	0.310833	0.434345	0.487875
BTSC_BT147_L_CACACAAGTATAATGG	-0.466288	14.9246	BT147_L	BT147	GSC	0.586185	0.212177	0.366086	0.250217	0.53456
BTSC_BT147_L_CACACTCAGAACTCGG	-7.14555	12.5505	BT147_L	BT147	GSC	0.547286	0.17932	0.11801	0.57517	0.476782
BTSC_BT147_L_CACACTCAGACAAGCC	0.514175	17.1815	BT147_L	BT147	GSC	0.645258	0.171592	0.258011	0.288647	0.544572
BTSC_BT147_L_CACAGGCGTCAACTGT	-6.42373	9.95766	BT147_L	BT147	GSC	0.643683	0.203604	0.29407	0.410446	0.60351
BTSC_BT147_L_CACAGGCGTGACAAAT	5.13763	21.6293	BT147_L	BT147	GSC	0.570779	0.191731	0.235932	0.496516	0.620234
BTSC_BT147_L_CACATAGCAAGAAAGG	-4.15396	12.9281	BT147_L	BT147	GSC	0.616425	0.177489	0.285436	0.306958	0.598525
BTSC_BT147_L_CACATTTAGCAGCGTA	-6.35632	11.9749	BT147_L	BT147	GSC	0.485453	0.186175	0.291181	0.427988	0.482622
BTSC_BT147_L_CACATTTGTGAAGGCT	5.54824	22.4957	BT147_L	BT147	GSC	0.568935	0.210952	0.257846	0.615396	0.567138
BTSC_BT147_L_CACCTTGCACAAGCCC	5.07249	18.5605	BT147_L	BT147	GSC	0.550228	0.199908	0.173816	0.562921	0.577339
BTSC_BT147_L_CACCTTGCACGGTTTA	-2.5847	11.4859	BT147_L	BT147	GSC	0.546386	0.297475	0.299641	0.265714	0.4917
BTSC_BT147_L_CACCTTGTCACGCGGT	-0.4303	12.4021	BT147_L	BT147	GSC	0.522982	0.124374	0.259049	0.369456	0.600665
BTSC_BT147_L_CACCTTGTCGTTTATC	3.19346	16.4846	BT147_L	BT147	GSC	0.578654	0.184626	0.270676	0.457634	0.629609
BTSC_BT147_L_CACTCCACACCTGGTG	-12.2863	7.63682	BT147_L	BT147	GSC	0.732625	0.193547	0.206387	0.453615	0.638381
BTSC_BT147_L_CACTCCATCTCCAACC	-6.53692	15.5578	BT147_L	BT147	GSC	0.753847	0.0893935	0.241436	0.305309	0.846842
BTSC_BT147_L_CAGAATCCACGGCTAC	-9.99308	11.1821	BT147_L	BT147	GSC	0.630307	0.115631	0.221891	0.38445	0.586757
BTSC_BT147_L_CAGAATCGTCTCTCGT	5.62783	17.4059	BT147_L	BT147	GSC	0.595646	0.198516	0.336344	0.357734	0.530816
BTSC_BT147_L_CAGAGAGCACCTATCC	2.6876	17.5054	BT147_L	BT147	GSC	0.598666	0.140054	0.283956	0.428726	0.418063
BTSC_BT147_L_CAGAGAGTCCTGCTTG	-9.99802	9.11343	BT147_L	BT147	GSC	0.58494	0.15222	0.282151	0.584192	0.456058
BTSC_BT147_L_CAGATCATCACCGTAA	-11.3366	11.8797	BT147_L	BT147	GSC	0.577985	0.168372	0.233155	0.338373	0.462699
BTSC_BT147_L_CAGCAGCCAAGCCCAC	-1.11528	16.725	BT147_L	BT147	GSC	0.58057	0.166536	0.287895	0.52142	0.531533
BTSC_BT147_L_CAGCAGCCATATGCTG	-2.36785	12.041	BT147_L	BT147	GSC	0.554171	0.218439	0.326351	0.435274	0.466003
BTSC_BT147_L_CAGCAGCGTGTGGTTT	-8.11761	11.0382	BT147_L	BT147	GSC	0.595718	0.127416	0.202131	0.443923	0.555066
BTSC_BT147_L_CAGCAGCTCACTTCAT	-11.3282	22.8496	BT147_L	BT147	GSC	0.484798	0.139366	0.208206	0.545241	0.422515
BTSC_BT147_L_CAGCATACATTTCACT	-15.0442	-5.54479	BT147_L	BT147	GSC	0.720209	0.192784	0.150271	0.359529	0.877371
BTSC_BT147_L_CAGCATATCAGCTCGG	-8.84019	6.29974	BT147_L	BT147	GSC	0.573378	0.221296	0.371944	0.375195	0.518157
BTSC_BT147_L_CAGCCGAAGTATCGAA	-6.56697	10.1927	BT147_L	BT147	GSC	0.738464	0.136588	0.114465	0.31629	0.590845
BTSC_BT147_L_CAGCGACAGGGTGTTG	0.0243988	12.8512	BT147_L	BT147	GSC	0.655195	0.191589	0.321067	0.447046	0.613365
BTSC_BT147_L_CAGCTAAAGCGAGAAA	0.727842	11.7979	BT147_L	BT147	GSC	0.582761	0.204912	0.209108	0.36041	0.651281
BTSC_BT147_L_CAGCTAACAGTACACT	-4.7001	13.8975	BT147_L	BT147	GSC	0.590053	0.144739	0.115302	0.332191	0.756514
BTSC_BT147_L_CAGCTAAGTAGAGTGC	-6.95167	9.25854	BT147_L	BT147	GSC	0.662242	0.203862	0.266761	0.370641	0.700854
BTSC_BT147_L_CAGCTAATCGGAATCT	-7.56346	12.4115	BT147_L	BT147	GSC	0.587508	0.182633	0.258203	0.381065	0.55837
BTSC_BT147_L_CAGCTGGAGTCAATAG	-6.19435	20.5175	BT147_L	BT147	GSC	0.605795	0.181258	0.206383	0.627854	0.586695
BTSC_BT147_L_CAGGTGCGTAGAGGAA	-3.31117	16.7251	BT147_L	BT147	GSC	0.574342	0.177918	0.247762	0.469037	0.583882
BTSC_BT147_L_CAGTAACAGACTTTCG	-0.288506	20.4651	BT147_L	BT147	GSC	0.590729	0.131131	0.201421	0.443359	0.545866
BTSC_BT147_L_CAGTAACAGATCGATA	-3.43383	7.86172	BT147_L	BT147	GSC	0.585269	0.132777	0.0936982	0.521673	0.569267
BTSC_BT147_L_CAGTCCTCAATCAGAA	-4.52574	8.76169	BT147_L	BT147	GSC	0.606248	0.172898	0.146087	0.544452	0.514446
BTSC_BT147_L_CAGTCCTCATTGGCGC	1.80807	16.8268	BT147_L	BT147	GSC	0.549482	0.205782	0.27937	0.525714	0.550933
BTSC_BT147_L_CAGTCCTGTGAAGGCT	-4.22224	13.0976	BT147_L	BT147	GSC	0.517239	0.188287	0.360725	0.292289	0.546004
BTSC_BT147_L_CAGTCCTGTTTAGCTG	3.17345	13.2419	BT147_L	BT147	GSC	0.616575	0.219056	0.170714	0.264156	0.606882
BTSC_BT147_L_CATATGGAGTCAAGCG	-11.8937	17.3238	BT147_L	BT147	GSC	0.551177	0.144636	0.146946	0.702264	0.49342
BTSC_BT147_L_CATATGGTCTTGGGTA	-10.7616	3.22064	BT147_L	BT147	GSC	0.85735	0.172145	0.116075	0.444408	0.816991
BTSC_BT147_L_CATATTCAGGTGCTAG	-12.4197	13.8937	BT147_L	BT147	GSC	0.57525	0.119696	0.4131	0.554672	0.507059
BTSC_BT147_L_CATATTCTCTTTAGGG	6.03738	15.3929	BT147_L	BT147	GSC	0.636868	0.207966	0.273136	0.363415	0.660556
BTSC_BT147_L_CATCAGACAGGTCCAC	-14.8234	0.571421	BT147_L	BT147	GSC	0.796527	0.106474	0.181689	0.528306	0.920775
BTSC_BT147_L_CATCCACAGACCTAGG	-13.1539	10.1978	BT147_L	BT147	GSC	0.624081	0.192394	0.119468	0.44932	0.739325
BTSC_BT147_L_CATCCACAGGTTACCT	-3.18584	16.9553	BT147_L	BT147	GSC	0.576906	0.0931945	0.0942057	0.375892	0.399152
BTSC_BT147_L_CATCCACAGTTAAGTG	-0.949122	19.621	BT147_L	BT147	GSC	0.617431	0.181752	0.22162	0.214973	0.546692
BTSC_BT147_L_CATCGAACAAGGTGTG	-2.14401	13.0375	BT147_L	BT147	GSC	0.59293	0.132524	0.270318	0.268067	0.521478
BTSC_BT147_L_CATCGGGTCTTTACAC	-14.9755	28.6241	BT147_L	BT147	GSC	0.44979	0.202048	0.291787	0.310371	0.617651
BTSC_BT147_L_CATGACATCGGCTTGG	-5.36589	7.34306	BT147_L	BT147	GSC	0.690337	0.161219	0.0654337	0.357355	0.566665
BTSC_BT147_L_CATGCCTAGAGCTTCT	3.57289	10.8624	BT147_L	BT147	GSC	0.544196	0.219793	0.325186	0.312434	0.712114
BTSC_BT147_L_CATGCCTCAATGGAGC	-2.33224	12.697	BT147_L	BT147	GSC	0.493508	0.160998	0.237629	0.480937	0.48848
BTSC_BT147_L_CATGCCTTCAGCTCGG	-3.0316	13.8836	BT147_L	BT147	GSC	0.520066	0.209538	0.226165	0.301797	0.603418
BTSC_BT147_L_CATGGCGTCCTAGAAC	-11.0384	8.42404	BT147_L	BT147	GSC	0.637584	0.187216	0.107327	0.260071	0.529861
BTSC_BT147_L_CATTCGCGTAAAGGAG	6.43347	18.232	BT147_L	BT147	GSC	0.590952	0.171535	0.241488	0.45783	0.487695
BTSC_BT147_L_CCAATCCAGGTTACCT	-5.59629	13.5191	BT147_L	BT147	GSC	0.487388	0.197095	0.201329	0.646454	0.372034
BTSC_BT147_L_CCAATCCGTCTCCATC	-10.7573	9.68225	BT147_L	BT147	GSC	0.727413	0.1266	0.184279	0.422873	0.70995
BTSC_BT147_L_CCAATCCTCCCATTTA	-19.285	14.3051	BT147_L	BT147	GSC	0.625804	0.163592	0.0159001	0.463264	0.529513
BTSC_BT147_L_CCACGGAAGCCAGGAT	-0.303042	20.1619	BT147_L	BT147	GSC	0.61349	0.146527	0.263923	0.496424	0.462806
BTSC_BT147_L_CCACGGAAGTAGCGGT	6.57605	16.0839	BT147_L	BT147	GSC	0.53101	0.1668	0.158806	0.479214	0.544187
BTSC_BT147_L_CCACGGACAACCGCCA	-4.16207	16.862	BT147_L	BT147	GSC	0.552376	0.208435	0.257185	0.384298	0.459978
BTSC_BT147_L_CCACGGAGTAGATTAG	-11.2729	1.97851	BT147_L	BT147	GSC	0.783361	0.180212	0.175384	0.547231	0.665815
BTSC_BT147_L_CCACTACAGAGTCTGG	-1.83351	9.16508	BT147_L	BT147	GSC	0.610689	0.18963	0.306065	0.301022	0.778307
BTSC_BT147_L_CCACTACCACCAGTTA	-10.6478	10.5213	BT147_L	BT147	GSC	0.496941	0.156545	0.271734	0.346536	0.588291
BTSC_BT147_L_CCAGCGACACAGAGGT	0.644475	14.412	BT147_L	BT147	GSC	0.601347	0.190628	0.213325	0.427485	0.593616
BTSC_BT147_L_CCAGCGATCTTGTATC	3.47023	20.6408	BT147_L	BT147	GSC	0.547013	0.161612	0.173784	0.362214	0.524381
BTSC_BT147_L_CCATGTCAGTGGGCTA	-4.75854	13.7162	BT147_L	BT147	GSC	0.583403	0.204453	0.279944	0.506897	0.449591
BTSC_BT147_L_CCATGTCCAAGGGTCA	-3.46866	13.5475	BT147_L	BT147	GSC	0.52912	0.196055	0.180377	0.440319	0.501417
BTSC_BT147_L_CCATGTCCAGGACGTA	5.47809	17.7455	BT147_L	BT147	GSC	0.527075	0.198852	0.249122	0.516216	0.647354
BTSC_BT147_L_CCATGTCGTGAGGGAG	-16.7524	-2.78374	BT147_L	BT147	GSC	0.830975	0.133722	0.153945	0.379651	0.71709
BTSC_BT147_L_CCATGTCTCAGTACGT	-0.901913	11.9505	BT147_L	BT147	GSC	0.612182	0.157866	0.203174	0.60084	0.49069
BTSC_BT147_L_CCATGTCTCTTTACAC	-4.16633	13.7609	BT147_L	BT147	GSC	0.538236	0.17231	0.330263	0.536367	0.576789
BTSC_BT147_L_CCATTCGCACTAGTAC	-5.09788	9.96239	BT147_L	BT147	GSC	0.580872	0.240255	0.209523	0.376261	0.457357
BTSC_BT147_L_CCCAATCGTTCATGGT	-6.55098	13.4573	BT147_L	BT147	GSC	0.554482	0.160544	0.0410165	0.422409	0.689881
BTSC_BT147_L_CCCAGTTCACATCCGG	3.09616	10.8226	BT147_L	BT147	GSC	0.535862	0.173163	0.225637	0.353554	0.523363
BTSC_BT147_L_CCCAGTTTCGAACTGT	-9.38772	5.29165	BT147_L	BT147	GSC	0.65877	0.267678	0.314791	0.22104	0.715715
BTSC_BT147_L_CCCATACAGAAACCTA	6.40014	17.9229	BT147_L	BT147	GSC	0.605444	0.199693	0.265311	0.377577	0.622552
BTSC_BT147_L_CCCATACCATTCTCAT	-0.32776	7.97062	BT147_L	BT147	GSC	0.649617	0.214272	0.235338	0.420824	0.645305
BTSC_BT147_L_CCCATACGTTACAGAA	-9.68933	11.7475	BT147_L	BT147	GSC	0.566856	0.163882	0.23084	0.348367	0.616727
BTSC_BT147_L_CCCTCCTCATTGGGCC	-2.87901	13.2129	BT147_L	BT147	GSC	0.517874	0.185259	0.204978	0.566444	0.445604
BTSC_BT147_L_CCGGGATGTAGCTGCC	-0.0347191	11.5415	BT147_L	BT147	GSC	0.559954	0.219815	0.304001	0.221637	0.70461
BTSC_BT147_L_CCGGGATTCTGACCTC	-1.85433	17.1506	BT147_L	BT147	GSC	0.560822	0.155918	0.277522	0.624237	0.493126
BTSC_BT147_L_CCGGTAGTCTCACATT	-15.8821	14.9092	BT147_L	BT147	GSC	0.60979	0.136948	0.105193	0.727263	0.613241
BTSC_BT147_L_CCGTACTGTGCGGTAA	-6.11419	1.68403	BT147_L	BT147	GSC	0.750915	0.192844	0.271471	0.31822	0.67974
BTSC_BT147_L_CCGTGGACAGTATGCT	-6.20634	13.7131	BT147_L	BT147	GSC	0.509512	0.176465	0.210172	0.627357	0.335533
BTSC_BT147_L_CCGTGGAGTGAAGGCT	-8.28567	11.4774	BT147_L	BT147	GSC	0.558907	0.183616	0.128647	0.454654	0.701611
BTSC_BT147_L_CCGTGGAGTTGATTCG	5.41453	12.7088	BT147_L	BT147	GSC	0.530137	0.225685	0.219814	0.519302	0.58226
BTSC_BT147_L_CCGTGGATCCTTTCGG	-5.07311	11.4559	BT147_L	BT147	GSC	0.574093	0.179852	0.167216	0.346778	0.549122
BTSC_BT147_L_CCGTGGATCGGTGTTA	-15.9292	6.2523	BT147_L	BT147	GSC	0.654292	0.187375	0.182445	0.205281	0.854404
BTSC_BT147_L_CCTAAAGAGATGGCGT	-0.915585	22.3968	BT147_L	BT147	GSC	0.392756	0.234552	0.273622	0.58651	0.435462
BTSC_BT147_L_CCTAAAGAGCTAGTTC	-10.8875	11.834	BT147_L	BT147	GSC	0.515045	0.169421	0.209128	0.358514	0.400463
BTSC_BT147_L_CCTAAAGGTGTTTGTG	-7.52317	15.7377	BT147_L	BT147	GSC	0.573929	0.209359	0.360611	0.627894	0.564159
BTSC_BT147_L_CCTACACAGTGTGAAT	-10.3957	9.25649	BT147_L	BT147	GSC	0.554097	0.21387	0.366652	0.440292	0.413896
BTSC_BT147_L_CCTACCAAGCTAAACA	-5.636	12.7826	BT147_L	BT147	GSC	0.503412	0.186027	0.178119	0.492811	0.545067
BTSC_BT147_L_CCTATTAGTGCATCTA	-14.7558	14.3108	BT147_L	BT147	GSC	0.642785	0.147749	0.0841063	0.52951	0.655737
BTSC_BT147_L_CCTCTGACAACACGCC	-20.8077	3.5189	BT147_L	BT147	GSC	0.675069	0.183374	0.102689	0.502504	0.704138
BTSC_BT147_L_CCTCTGACAATGGACG	-2.14257	12.2213	BT147_L	BT147	GSC	0.628077	0.165454	0.106211	0.382566	0.799367
BTSC_BT147_L_CCTCTGAGTTTCGCTC	-14.5497	17.2367	BT147_L	BT147	GSC	0.650214	0.104564	0.0139809	0.64598	0.506863
BTSC_BT147_L_CCTCTGATCTCGCTTG	-11.2075	11.2542	BT147_L	BT147	GSC	0.589032	0.14665	0.192892	0.533623	0.499371
BTSC_BT147_L_CCTTACGAGCGAAGGG	-3.51839	16.3958	BT147_L	BT147	GSC	0.552287	0.146568	0.192796	0.565901	0.445075
BTSC_BT147_L_CCTTACGTCCATTCTA	-9.82032	7.22726	BT147_L	BT147	GSC	0.660223	0.200596	0.18168	0.363149	0.73246
BTSC_BT147_L_CCTTCCCAGATGTGGC	3.21682	20.7914	BT147_L	BT147	GSC	0.618023	0.156739	0.15054	0.416562	0.581573
BTSC_BT147_L_CCTTCCCGTACGCTGC	4.68118	13.8962	BT147_L	BT147	GSC	0.537412	0.136141	0.13439	0.348477	0.661113
BTSC_BT147_L_CCTTCCCGTAGCAAAT	-4.06287	15.3236	BT147_L	BT147	GSC	0.568589	0.138121	0.272271	0.490316	0.467053
BTSC_BT147_L_CCTTCCCGTGAGGCTA	-6.70411	17.8124	BT147_L	BT147	GSC	0.593938	0.204005	0.26506	0.354409	0.580698
BTSC_BT147_L_CCTTCGACATAGACTC	-19.3251	-3.32589	BT147_L	BT147	GSC	0.814102	0.0943092	0.131296	0.390813	0.756347
BTSC_BT147_L_CCTTCGAGTGTGAATA	5.00206	21.3671	BT147_L	BT147	GSC	0.577167	0.172442	0.135299	0.576815	0.539992
BTSC_BT147_L_CCTTTCTAGTGGCACA	-9.56195	7.15324	BT147_L	BT147	GSC	0.711978	0.197432	0.302725	0.350785	0.880889
BTSC_BT147_L_CCTTTCTCACCACGTG	1.67632	13.3755	BT147_L	BT147	GSC	0.597369	0.205194	0.215752	0.39151	0.685693
BTSC_BT147_L_CGAACATAGTGCCATT	-0.0165703	14.3838	BT147_L	BT147	GSC	0.644236	0.0870105	0.134103	0.512203	0.50205
BTSC_BT147_L_CGAACATCATAAGACA	5.90282	13.2286	BT147_L	BT147	GSC	0.606607	0.183133	0.301288	0.328774	0.614762
BTSC_BT147_L_CGAACATCATTCCTGC	-12.5379	17.2326	BT147_L	BT147	GSC	0.623115	0.136865	0.14098	0.445867	0.588827
BTSC_BT147_L_CGAACATTCCCAAGTA	-5.65847	7.03685	BT147_L	BT147	GSC	0.43541	0.300227	0.344902	0.361922	0.536603
BTSC_BT147_L_CGAATGTGTACCGTTA	-8.67551	6.60004	BT147_L	BT147	GSC	0.608731	0.170765	0.291962	0.365424	0.506996
BTSC_BT147_L_CGAATGTGTCGAATCT	-10.5752	7.32027	BT147_L	BT147	GSC	0.562614	0.229882	0.218096	0.361695	0.461539
BTSC_BT147_L_CGACCTTAGACGCACA	1.34641	18.0162	BT147_L	BT147	GSC	0.570573	0.180935	0.237149	0.361842	0.609053
BTSC_BT147_L_CGACCTTAGGGAAACA	-13.0093	9.95356	BT147_L	BT147	GSC	0.553797	0.164002	0.0837457	0.53519	0.381032
BTSC_BT147_L_CGACCTTTCGTCCGTT	-5.12771	14.2351	BT147_L	BT147	GSC	0.547214	0.219548	0.140217	0.515209	0.280995
BTSC_BT147_L_CGACTTCAGTCCGGTC	-4.91041	17.0576	BT147_L	BT147	GSC	0.506387	0.137706	0.293384	0.42623	0.442251
BTSC_BT147_L_CGACTTCCACTTCGAA	-8.86942	13.8051	BT147_L	BT147	GSC	0.424494	0.191332	0.329986	0.500384	0.467303
BTSC_BT147_L_CGACTTCGTCTTCGTC	-2.54055	13.3581	BT147_L	BT147	GSC	0.620419	0.238989	0.183877	0.394223	0.600028
BTSC_BT147_L_CGAGAAGAGCCGGTAA	9.55483	18.2678	BT147_L	BT147	GSC	0.506289	0.240211	0.287749	0.481047	0.504031
BTSC_BT147_L_CGAGAAGCACCTTGTC	4.63686	14.4745	BT147_L	BT147	GSC	0.626489	0.180865	0.34297	0.527198	0.644212
BTSC_BT147_L_CGAGCCAAGAAACGCC	2.55883	14.1989	BT147_L	BT147	GSC	0.544074	0.175873	0.10634	0.375865	0.480115
BTSC_BT147_L_CGAGCCAAGGTTCCTA	-21.0117	-2.02955	BT147_L	BT147	GSC	0.783944	0.102574	0.108397	0.465017	0.708992
BTSC_BT147_L_CGAGCCACAGGTCCAC	-8.31763	13.4353	BT147_L	BT147	GSC	0.561034	0.201064	0.205859	0.605536	0.365204
BTSC_BT147_L_CGAGCCATCAAGGTAA	0.98801	16.9788	BT147_L	BT147	GSC	0.620217	0.180209	0.215346	0.374211	0.605184
BTSC_BT147_L_CGATCGGCAAGTCTGT	8.59347	19.389	BT147_L	BT147	GSC	0.552988	0.215724	0.19844	0.385923	0.74087
BTSC_BT147_L_CGATCGGTCACAATGC	2.65091	12.4897	BT147_L	BT147	GSC	0.679678	0.205931	0.158765	0.484915	0.667227
BTSC_BT147_L_CGATGGCGTAGAGTGC	7.82687	21.063	BT147_L	BT147	GSC	0.545871	0.136742	0.216288	0.672443	0.413911
BTSC_BT147_L_CGATGTAGTAATCGTC	-8.49023	17.7339	BT147_L	BT147	GSC	0.547525	0.147672	0.314178	0.477003	0.485049
BTSC_BT147_L_CGATGTATCAGTACGT	-0.857636	11.1437	BT147_L	BT147	GSC	0.61959	0.13542	0.258578	0.510363	0.702957
BTSC_BT147_L_CGATGTATCTCCTATA	-5.47779	13.0006	BT147_L	BT147	GSC	0.545497	0.140993	0.18846	0.659425	0.430914
BTSC_BT147_L_CGCCAAGCAACCGCCA	-5.1373	11.9333	BT147_L	BT147	GSC	0.515787	0.224679	0.279733	0.479589	0.517081
BTSC_BT147_L_CGCCAAGCAGCATACT	-8.27536	10.7204	BT147_L	BT147	GSC	0.562718	0.231279	0.340595	0.27072	0.618297
BTSC_BT147_L_CGCCAAGGTTATTCTC	-4.07325	18.6844	BT147_L	BT147	GSC	0.623523	0.15771	0.0852804	0.449866	0.597812
BTSC_BT147_L_CGCCAAGTCGATGAGG	-16.6497	3.58014	BT147_L	BT147	GSC	0.725152	0.147727	0.241071	0.440724	0.704942
BTSC_BT147_L_CGCGGTATCAAACGGG	-6.47374	12.1856	BT147_L	BT147	GSC	0.722289	0.172661	0.295714	0.327142	0.7619
BTSC_BT147_L_CGCGTTTAGAAGATTC	-8.59466	13.8647	BT147_L	BT147	GSC	0.562751	0.226865	0.280296	0.352428	0.689777
BTSC_BT147_L_CGCGTTTCAATGTAAG	2.09504	16.4886	BT147_L	BT147	GSC	0.637613	0.161073	0.208352	0.380944	0.662156
BTSC_BT147_L_CGCTATCAGTAGGCCA	-1.65906	2.21598	BT147_L	BT147	GSC	0.700734	0.231323	0.323818	0.244392	0.831368
BTSC_BT147_L_CGCTGGACACCCAGTG	0.42064	12.892	BT147_L	BT147	GSC	0.552347	0.215498	0.287176	0.498517	0.564915
BTSC_BT147_L_CGCTTCACATTGGTAC	-5.44946	12.5256	BT147_L	BT147	GSC	0.752957	0.10298	0.2145	0.572338	0.822487
BTSC_BT147_L_CGGACACTCGTGACAT	1.01029	8.28683	BT147_L	BT147	GSC	0.544671	0.24626	0.168349	0.292075	0.58192
BTSC_BT147_L_CGGACGTGTTCGTCTC	-1.86745	26.8424	BT147_L	BT147	GSC	0.606295	0.0409367	0.226274	0.570479	0.383951
BTSC_BT147_L_CGGACGTTCCGTCATC	-10.3381	10.0584	BT147_L	BT147	GSC	0.583754	0.191756	0.339996	0.421944	0.435191
BTSC_BT147_L_CGGACTGGTAGCGCAA	5.56193	20.1628	BT147_L	BT147	GSC	0.577152	0.147477	0.168309	0.568959	0.256176
BTSC_BT147_L_CGGAGCTAGTTAACGA	-7.27675	6.77262	BT147_L	BT147	GSC	0.701782	0.0934617	0.122844	0.386654	0.420528
BTSC_BT147_L_CGGAGTCAGCGCCTTG	1.52918	14.4968	BT147_L	BT147	GSC	0.552168	0.205482	0.28295	0.488449	0.560677
BTSC_BT147_L_CGGAGTCGTACTCGCG	-8.74001	18.1468	BT147_L	BT147	GSC	0.483619	0.211169	0.244593	0.499354	0.623553
BTSC_BT147_L_CGGAGTCGTTTGTGTG	3.68626	6.94562	BT147_L	BT147	GSC	0.656602	0.157771	0.32915	0.557925	0.562072
BTSC_BT147_L_CGGCTAGAGCAATCTC	-3.5043	16.9485	BT147_L	BT147	GSC	0.547752	0.156142	0.175829	0.562339	0.497753
BTSC_BT147_L_CGGCTAGAGTGGCACA	-0.583916	15.3603	BT147_L	BT147	GSC	0.556728	0.194922	0.131413	0.41821	0.33726
BTSC_BT147_L_CGGCTAGTCAATACCG	-7.20363	5.12958	BT147_L	BT147	GSC	0.665714	0.171587	0.112869	0.501854	0.687371
BTSC_BT147_L_CGGTTAACACCCATTC	-4.48655	14.5824	BT147_L	BT147	GSC	0.428364	0.15877	0.23024	0.32582	0.362916
BTSC_BT147_L_CGGTTAACAGTCCTTC	-11.729	12.8635	BT147_L	BT147	GSC	0.546512	0.144425	0.238756	0.51446	0.409164
BTSC_BT147_L_CGGTTAACAGTTCATG	5.1026	16.7202	BT147_L	BT147	GSC	0.571259	0.221237	0.351772	0.453198	0.567647
BTSC_BT147_L_CGGTTAAGTATATGAG	-17.0926	5.47339	BT147_L	BT147	GSC	0.710675	0.164357	0.187173	0.435712	0.611797
BTSC_BT147_L_CGTAGCGAGAGCCCAA	-6.30389	13.5388	BT147_L	BT147	GSC	0.497025	0.232659	0.311818	0.550104	0.427634
BTSC_BT147_L_CGTAGCGAGGGAACGG	-11.8164	6.62919	BT147_L	BT147	GSC	0.618828	0.204685	0.119183	0.462087	0.632078
BTSC_BT147_L_CGTAGCGCACGTAAGG	4.6112	11.9615	BT147_L	BT147	GSC	0.549188	0.198344	0.143759	0.253799	0.713886
BTSC_BT147_L_CGTAGCGCATCGATGT	-12.9222	1.59979	BT147_L	BT147	GSC	0.763327	0.190457	0.100193	0.324488	0.815995
BTSC_BT147_L_CGTAGGCTCCCAGGTG	0.63513	11.1673	BT147_L	BT147	GSC	0.591147	0.205982	0.226703	0.399778	0.681459
BTSC_BT147_L_CGTCACTCAATGGATA	-7.29763	14.8039	BT147_L	BT147	GSC	0.486082	0.169952	0.249624	0.471602	0.600208
BTSC_BT147_L_CGTCACTTCAGCTCGG	-20.9842	-3.39948	BT147_L	BT147	GSC	0.900278	0.141615	0.191663	0.428108	0.819825
BTSC_BT147_L_CGTCAGGCAAGCCCAC	1.79728	15.7731	BT147_L	BT147	GSC	0.538228	0.184086	0.267289	0.309434	0.479674
BTSC_BT147_L_CGTCAGGTCATAGCAC	-14.4284	17.5129	BT147_L	BT147	GSC	0.578516	0.163613	0.142907	0.488536	0.664046
BTSC_BT147_L_CGTCAGGTCCTTGGTC	-13.1671	2.51411	BT147_L	BT147	GSC	0.623975	0.171121	0.314748	0.344527	0.5826
BTSC_BT147_L_CGTCCATAGACATAAC	-13.2145	12.0068	BT147_L	BT147	GSC	0.601147	0.187339	0.189509	0.430586	0.608205
BTSC_BT147_L_CGTCCATAGTTCCACA	-5.91408	11.173	BT147_L	BT147	GSC	0.567519	0.220362	0.284178	0.538224	0.50397
BTSC_BT147_L_CGTCCATCACAGGCCT	-7.55178	6.00583	BT147_L	BT147	GSC	0.585882	0.302827	0.331928	0.15341	0.659243
BTSC_BT147_L_CGTCCATTCCACGACG	-9.15569	23.7657	BT147_L	BT147	GSC	0.563161	0.117394	0.140901	0.488438	0.749574
BTSC_BT147_L_CGTCCATTCCTTGCCA	-2.79405	19.6159	BT147_L	BT147	GSC	0.621987	0.139929	0.185327	0.399016	0.747633
BTSC_BT147_L_CGTGAGCAGATATGGT	-6.63636	12.2166	BT147_L	BT147	GSC	0.569796	0.183417	0.267704	0.427468	0.683389
BTSC_BT147_L_CGTGAGCTCCACGTTC	-6.15365	15.3487	BT147_L	BT147	GSC	0.601549	0.176845	0.237013	0.475002	0.570374
BTSC_BT147_L_CGTGTAACAAGGTGTG	-4.44762	16.6625	BT147_L	BT147	GSC	0.472672	0.169934	0.183432	0.58424	0.265118
BTSC_BT147_L_CGTGTAAGTCAATGTC	6.88826	16.9567	BT147_L	BT147	GSC	0.558157	0.163857	0.31831	0.465981	0.572175
BTSC_BT147_L_CGTGTCTAGCGATGAC	5.92339	16.8955	BT147_L	BT147	GSC	0.540697	0.139859	0.203591	0.430484	0.540471
BTSC_BT147_L_CGTGTCTCAGGTCGTC	-18.1008	2.74753	BT147_L	BT147	GSC	0.755541	0.141499	0.0516697	0.582488	0.679226
BTSC_BT147_L_CGTGTCTCATGGTCTA	-10.5953	8.35259	BT147_L	BT147	GSC	0.648105	0.140458	0.230943	0.355273	0.774899
BTSC_BT147_L_CGTTAGAAGGAATGGA	3.55606	13.8149	BT147_L	BT147	GSC	0.622253	0.183551	0.230957	0.490377	0.606242
BTSC_BT147_L_CGTTCTGAGTACGCGA	4.00907	19.1353	BT147_L	BT147	GSC	0.555366	0.149588	0.240227	0.56614	0.596523
BTSC_BT147_L_CGTTCTGGTAAGAGAG	-7.45641	11.337	BT147_L	BT147	GSC	0.627509	0.223684	0.278515	0.517076	0.568454
BTSC_BT147_L_CGTTCTGGTTTGACTG	-6.49821	9.73187	BT147_L	BT147	GSC	0.621599	0.173188	0.326853	0.375206	0.632629
BTSC_BT147_L_CGTTCTGTCGTTGACA	2.90505	11.5031	BT147_L	BT147	GSC	0.531853	0.231847	0.340567	0.374567	0.599351
BTSC_BT147_L_CGTTCTGTCTCTAAGG	-9.59375	11.8557	BT147_L	BT147	GSC	0.627248	0.234884	0.104805	0.385538	0.653759
BTSC_BT147_L_CGTTGGGCAAGCTGAG	-3.06139	8.09994	BT147_L	BT147	GSC	0.572955	0.179528	0.220297	0.355535	0.530283
BTSC_BT147_L_CGTTGGGCAGTATGCT	-4.27634	13.8427	BT147_L	BT147	GSC	0.603727	0.146968	0.28311	0.327386	0.709298
BTSC_BT147_L_CTAACTTAGGTGATTA	-3.47023	7.43269	BT147_L	BT147	GSC	0.579135	0.183882	0.197919	0.50361	0.352827
BTSC_BT147_L_CTAAGACGTGCAACGA	5.85058	19.8119	BT147_L	BT147	GSC	0.617023	0.15889	0.272592	0.490869	0.569509
BTSC_BT147_L_CTACACCCACGAGAGT	-1.81756	15.5307	BT147_L	BT147	GSC	0.582449	0.240394	0.349938	0.252785	0.441449
BTSC_BT147_L_CTACACCCATTCCTGC	-6.34481	-0.135615	BT147_L	BT147	GSC	0.514852	0.29587	0.255465	0.229524	0.666375
BTSC_BT147_L_CTACACCGTTGGTAAA	-6.18203	8.45405	BT147_L	BT147	GSC	0.5631	0.25183	0.327944	0.314728	0.521479
BTSC_BT147_L_CTACACCTCGACCAGC	-2.4273	13.9691	BT147_L	BT147	GSC	0.662734	0.159927	0.174003	0.375022	0.666331
BTSC_BT147_L_CTACATTCAAGTTGTC	-8.27777	16.6549	BT147_L	BT147	GSC	0.5853	0.132987	0.295478	0.438728	0.661908
BTSC_BT147_L_CTACATTTCAGAAATG	-16.0889	5.72947	BT147_L	BT147	GSC	0.711161	0.179863	0.202412	0.343815	0.813392
BTSC_BT147_L_CTACCCAAGCTGAACG	-2.712	10.2595	BT147_L	BT147	GSC	0.745879	0.1958	0.243139	0.355157	0.638446
BTSC_BT147_L_CTACCCATCTCACATT	2.77942	14.468	BT147_L	BT147	GSC	0.624078	0.193889	0.194951	0.446384	0.547617
BTSC_BT147_L_CTACGTCGTCTCACCT	-11.6894	13.1746	BT147_L	BT147	GSC	0.620914	0.142598	0.155034	0.473249	0.49301
BTSC_BT147_L_CTACGTCGTGTTTGGT	-1.73092	15.6533	BT147_L	BT147	GSC	0.50193	0.149285	0.279146	0.546921	0.337461
BTSC_BT147_L_CTAGAGTAGCATCATC	-0.504496	15.0633	BT147_L	BT147	GSC	0.57955	0.24107	0.299271	0.299122	0.648321
BTSC_BT147_L_CTAGAGTGTCATATGC	5.56379	15.13	BT147_L	BT147	GSC	0.556405	0.197856	0.200238	0.646542	0.470292
BTSC_BT147_L_CTAGAGTGTCTAAACC	0.819782	14.907	BT147_L	BT147	GSC	0.451372	0.238198	0.281852	0.373748	0.394224
BTSC_BT147_L_CTAGCCTCAAGCCCAC	-11.0106	3.19888	BT147_L	BT147	GSC	0.85057	0.148469	0.164364	0.371063	0.834548
BTSC_BT147_L_CTAGCCTGTCTAGCCG	2.14226	19.2865	BT147_L	BT147	GSC	0.586432	0.147472	0.184771	0.487781	0.448028
BTSC_BT147_L_CTAGTGAGTCTAGCGC	0.107713	27.2548	BT147_L	BT147	GSC	0.409606	0.213653	0.286795	0.457139	0.340041
BTSC_BT147_L_CTCATTAAGTAGCGGT	4.39691	12.3942	BT147_L	BT147	GSC	0.574906	0.260451	0.337687	0.447111	0.63338
BTSC_BT147_L_CTCATTAGTACGCACC	-3.64513	13.7142	BT147_L	BT147	GSC	0.708383	0.19875	0.210839	0.503802	0.676176
BTSC_BT147_L_CTCCTAGGTAACGACG	-9.74733	6.74311	BT147_L	BT147	GSC	0.675851	0.203679	0.333435	0.393641	0.577231
BTSC_BT147_L_CTCGAAACACAGGAGT	3.92599	15.9356	BT147_L	BT147	GSC	0.596176	0.146461	0.336142	0.220492	0.649588
BTSC_BT147_L_CTCGGAGCACAACGCC	-6.81102	10.6936	BT147_L	BT147	GSC	0.562673	0.191985	0.213024	0.247665	0.566045
BTSC_BT147_L_CTCGGGAGTAAGGGAA	0.544889	13.0804	BT147_L	BT147	GSC	0.496282	0.186363	0.304959	0.561859	0.463435
BTSC_BT147_L_CTCGGGAGTTTGACTG	-9.69635	8.04582	BT147_L	BT147	GSC	0.715136	0.205275	0.173803	0.498408	0.649415
BTSC_BT147_L_CTCGGGATCGACGGAA	5.0668	19.5402	BT147_L	BT147	GSC	0.609368	0.154804	0.242601	0.448987	0.582725
BTSC_BT147_L_CTCGGGATCTGCGACG	-4.13135	10.5154	BT147_L	BT147	GSC	0.521228	0.174715	0.302324	0.283146	0.69608
BTSC_BT147_L_CTCGTACAGGGCTTGA	2.63275	19.5108	BT147_L	BT147	GSC	0.574486	0.138435	0.217025	0.470924	0.553458
BTSC_BT147_L_CTCGTACGTGTAAGTA	-10.3062	5.72711	BT147_L	BT147	GSC	0.670218	0.177797	0.263962	0.397612	0.584279
BTSC_BT147_L_CTCGTACTCACCTTAT	0.54211	13.5431	BT147_L	BT147	GSC	0.619333	0.12685	0.162485	0.448707	0.732703
BTSC_BT147_L_CTCGTACTCCTGCAGG	-1.55466	1.96277	BT147_L	BT147	GSC	0.251451	0.155909	0.372128	0.579438	0.0654825
BTSC_BT147_L_CTCGTCAAGCCAACAG	-5.84728	9.09739	BT147_L	BT147	GSC	0.642472	0.121141	0.291711	0.377659	0.553835
BTSC_BT147_L_CTCTAATCACCCATGG	-9.20525	13.9385	BT147_L	BT147	GSC	0.687383	0.141157	0.181281	0.408772	0.775967
BTSC_BT147_L_CTCTAATTCGGCCGAT	5.01358	18.3959	BT147_L	BT147	GSC	0.461547	0.202158	0.244584	0.35093	0.307179
BTSC_BT147_L_CTCTGGTAGTAGCGGT	-9.722	8.00978	BT147_L	BT147	GSC	0.696284	0.168803	0.159121	0.478368	0.734468
BTSC_BT147_L_CTCTGGTCACGTTGGC	-11.9175	10.5193	BT147_L	BT147	GSC	0.705528	0.187583	0.0301779	0.31207	0.690898
BTSC_BT147_L_CTCTGGTGTCGTGGCT	-5.3054	12.1912	BT147_L	BT147	GSC	0.441032	0.213898	0.41185	0.44256	0.388563
BTSC_BT147_L_CTCTGGTTCGTACGGC	6.44692	19.7615	BT147_L	BT147	GSC	0.5951	0.163919	0.220751	0.139089	0.461875
BTSC_BT147_L_CTGAAACAGTGCGATG	-7.74377	14.0689	BT147_L	BT147	GSC	0.702309	0.174893	0.198854	0.5132	0.749935
BTSC_BT147_L_CTGAAGTGTGCTAGCC	-9.12625	8.90317	BT147_L	BT147	GSC	0.667473	0.190749	0.0940865	0.313644	0.655385
BTSC_BT147_L_CTGAAGTGTTCGTTGA	-6.92217	15.3861	BT147_L	BT147	GSC	0.571682	0.123968	0.249106	0.308025	0.51455
BTSC_BT147_L_CTGATAGAGCTGATAA	-9.66885	13.7674	BT147_L	BT147	GSC	0.593067	0.142541	0.247033	0.27622	0.494589
BTSC_BT147_L_CTGATCCGTGTGACCC	4.74966	22.2121	BT147_L	BT147	GSC	0.616033	0.182722	0.161634	0.463642	0.467869
BTSC_BT147_L_CTGCCTAAGATACACA	2.67154	13.1225	BT147_L	BT147	GSC	0.592588	0.143796	0.18862	0.4868	0.565424
BTSC_BT147_L_CTGGTCTAGGAACTGC	-8.25819	9.94355	BT147_L	BT147	GSC	0.620452	0.157731	0.402737	0.358335	0.522303
BTSC_BT147_L_CTGGTCTAGTGTACGG	-12.076	7.49539	BT147_L	BT147	GSC	0.678942	0.13803	0.211263	0.473877	0.710642
BTSC_BT147_L_CTGGTCTCAACACGCC	-11.5319	9.4672	BT147_L	BT147	GSC	0.670297	0.134353	0.181321	0.331894	0.587125
BTSC_BT147_L_CTGGTCTGTACCTACA	3.93863	16.5362	BT147_L	BT147	GSC	0.597941	0.172252	0.224213	0.327474	0.541321
BTSC_BT147_L_CTGTGCTAGAAGGTTT	-7.78845	12.182	BT147_L	BT147	GSC	0.652549	0.0692473	0.0624947	0.243828	0.614518
BTSC_BT147_L_CTGTGCTCAGTTCCCT	0.147679	10.8024	BT147_L	BT147	GSC	0.569049	0.246302	0.178252	0.322021	0.531591
BTSC_BT147_L_CTGTGCTTCCGCTGTT	-3.30987	16.7509	BT147_L	BT147	GSC	0.612228	0.130772	0.244069	0.540869	0.568507
BTSC_BT147_L_CTGTTTAAGTGGTAAT	-13.0693	13.4001	BT147_L	BT147	GSC	0.610779	0.127937	0.186195	0.490643	0.634833
BTSC_BT147_L_CTGTTTATCTCTAGGA	-11.6872	10.776	BT147_L	BT147	GSC	0.625927	0.179333	0.0504049	0.446714	0.630271
BTSC_BT147_L_CTTAACTAGACATAAC	2.01653	12.7651	BT147_L	BT147	GSC	0.630873	0.19407	0.256383	0.356199	0.558125
BTSC_BT147_L_CTTAACTTCCAAACAC	-2.64951	12.8221	BT147_L	BT147	GSC	0.682268	0.216379	0.235771	0.280661	0.645898
BTSC_BT147_L_CTTACCGAGTGTTTGC	-2.06611	12.4875	BT147_L	BT147	GSC	0.441531	0.24193	0.256717	0.379511	0.254696
BTSC_BT147_L_CTTACCGCAATGGATA	-3.95914	13.9864	BT147_L	BT147	GSC	0.544743	0.128491	0.192812	0.447966	0.395322
BTSC_BT147_L_CTTACCGCATCGATTG	-7.42077	13.789	BT147_L	BT147	GSC	0.557817	0.181942	0.151323	0.41149	0.505163
BTSC_BT147_L_CTTACCGGTTCCGTCT	-8.57457	5.2215	BT147_L	BT147	GSC	0.660872	0.134662	0.0710208	0.31687	0.748523
BTSC_BT147_L_CTTCTCTAGCGTTGCC	5.19111	19.6623	BT147_L	BT147	GSC	0.630647	0.116393	0.239735	0.350082	0.587557
BTSC_BT147_L_CTTCTCTCAGGGTTAG	0.625967	14.8892	BT147_L	BT147	GSC	0.525763	0.151691	0.228596	0.49229	0.409658
BTSC_BT147_L_CTTCTCTGTTGCCTCT	3.064	19.1167	BT147_L	BT147	GSC	0.55005	0.241121	0.232733	0.376831	0.566688
BTSC_BT147_L_CTTGGCTCATGTTGAC	-1.9024	18.5238	BT147_L	BT147	GSC	0.615913	0.187144	0.242193	0.298385	0.50665
BTSC_BT147_L_CTTGGCTTCAGCATGT	0.0248181	16.0858	BT147_L	BT147	GSC	0.644155	0.14742	0.221101	0.428217	0.783461
BTSC_BT147_L_CTTTGCGAGCTCTCGG	-5.36895	11.9257	BT147_L	BT147	GSC	0.556552	0.164143	0.308681	0.466858	0.781393
BTSC_BT147_L_GAAACTCAGCTAACAA	-3.85294	15.3115	BT147_L	BT147	GSC	0.589429	0.138499	0.194866	0.46135	0.479802
BTSC_BT147_L_GAAACTCCAGATGGGT	-5.19368	4.97709	BT147_L	BT147	GSC	0.654764	0.201243	0.179683	0.431316	0.748652
BTSC_BT147_L_GAAACTCGTCGCGTGT	-3.78349	7.78818	BT147_L	BT147	GSC	0.744215	0.215442	0.265018	0.41233	0.72525
BTSC_BT147_L_GAAACTCTCTACTCAT	-0.670958	13.1189	BT147_L	BT147	GSC	0.674831	0.211128	0.173901	0.30527	0.57962
BTSC_BT147_L_GAAATGAAGGCTCAGA	5.59698	16.9031	BT147_L	BT147	GSC	0.623044	0.1629	0.298925	0.502845	0.637586
BTSC_BT147_L_GAAATGAGTGAAGGCT	-8.47051	14.8124	BT147_L	BT147	GSC	0.616324	0.175759	0.2207	0.382262	0.589848
BTSC_BT147_L_GAACCTACACTTCTGC	-10.8031	13.3298	BT147_L	BT147	GSC	0.593856	0.156468	0.301987	0.455926	0.503227
BTSC_BT147_L_GAACCTAGTCTTCTCG	-8.90482	12.1977	BT147_L	BT147	GSC	0.493468	0.156407	0.251092	0.421864	0.585405
BTSC_BT147_L_GAACGGATCGCGCCAA	4.56933	11.5052	BT147_L	BT147	GSC	0.625685	0.215039	0.231364	0.322795	0.715152
BTSC_BT147_L_GAAGCAGCAAATCCGT	-8.84509	8.11656	BT147_L	BT147	GSC	0.792026	0.125448	0.276694	0.446494	0.751042
BTSC_BT147_L_GAATAAGGTAGCGTCC	-5.24465	13.6412	BT147_L	BT147	GSC	0.619541	0.133471	0.145321	0.39533	0.653954
BTSC_BT147_L_GAATGAATCAAACGGG	-4.83604	8.57606	BT147_L	BT147	GSC	0.589586	0.193689	0.238324	0.254231	0.656359
BTSC_BT147_L_GACACGCAGCTAGTTC	-6.88975	16.0774	BT147_L	BT147	GSC	0.632734	0.186019	0.202404	0.478262	0.684058
BTSC_BT147_L_GACACGCCACTTAAGC	-6.74115	15.607	BT147_L	BT147	GSC	0.519041	0.144719	0.186668	0.42783	0.59501
BTSC_BT147_L_GACAGAGGTAGCGCAA	3.82856	14.9233	BT147_L	BT147	GSC	0.605636	0.248414	0.321372	0.275718	0.441104
BTSC_BT147_L_GACAGAGGTGATGCCC	-7.21829	11.0834	BT147_L	BT147	GSC	0.57552	0.148581	0.251584	0.561502	0.434027
BTSC_BT147_L_GACAGAGGTTCCGTCT	-10.4806	9.30675	BT147_L	BT147	GSC	0.920673	0.0648934	0.0846286	0.499491	0.741762
BTSC_BT147_L_GACAGAGTCGTTACGA	-9.36165	13.6423	BT147_L	BT147	GSC	0.537861	0.181668	0.294185	0.643096	0.430907
BTSC_BT147_L_GACAGAGTCTTCAACT	-11.1792	9.62289	BT147_L	BT147	GSC	0.588811	0.0998868	0.23532	0.646374	0.56817
BTSC_BT147_L_GACCTGGAGAGTGACC	-4.39008	8.95435	BT147_L	BT147	GSC	0.48949	0.252619	0.252031	0.408031	0.649539
BTSC_BT147_L_GACCTGGAGCCATCGC	-3.46425	18.885	BT147_L	BT147	GSC	0.54644	0.185542	0.15765	0.439306	0.644036
BTSC_BT147_L_GACGCGTAGTCCAGGA	4.12994	18.3654	BT147_L	BT147	GSC	0.562863	0.170431	0.156073	0.446096	0.397612
BTSC_BT147_L_GACGCGTCACAACGTT	-9.21686	15.6858	BT147_L	BT147	GSC	0.598763	0.139054	0.253318	0.536909	0.418969
BTSC_BT147_L_GACGCGTCAGATGAGC	0.737193	15.7403	BT147_L	BT147	GSC	0.701335	0.172722	0.167538	0.424459	0.729312
BTSC_BT147_L_GACGCGTGTTGTCGCG	-2.61199	16.5532	BT147_L	BT147	GSC	0.625172	0.134502	0.18301	0.535382	0.505195
BTSC_BT147_L_GACGTTAGTCAACATC	-8.92423	3.35533	BT147_L	BT147	GSC	0.624254	0.232945	0.256505	0.373897	0.54863
BTSC_BT147_L_GACTAACGTCAGCTAT	-2.808	20.4539	BT147_L	BT147	GSC	0.601592	0.12201	0.282396	0.422914	0.648958
BTSC_BT147_L_GACTAACGTGGGTATG	7.80578	16.4896	BT147_L	BT147	GSC	0.51359	0.193886	0.265654	0.49758	0.542192
BTSC_BT147_L_GACTGCGTCTGTCCGT	4.80217	20.6085	BT147_L	BT147	GSC	0.555532	0.134063	0.148756	0.537862	0.638893
BTSC_BT147_L_GAGCAGAAGAGACTTA	-2.00141	12.1182	BT147_L	BT147	GSC	0.632083	0.186728	0.318957	0.493401	0.703592
BTSC_BT147_L_GAGCAGAAGCCGATTT	-2.77292	9.17695	BT147_L	BT147	GSC	0.461042	0.221582	0.385595	0.406206	0.323258
BTSC_BT147_L_GAGCAGAAGCGTTTAC	-10.7447	12.1716	BT147_L	BT147	GSC	0.589936	0.165542	0.214606	0.503971	0.58216
BTSC_BT147_L_GAGCAGAAGGAGTTGC	-13.0432	12.0545	BT147_L	BT147	GSC	0.520856	0.125781	0.260289	0.650979	0.591977
BTSC_BT147_L_GAGGTGACACAAGTAA	-5.62264	13.6777	BT147_L	BT147	GSC	0.546601	0.15782	0.150813	0.527719	0.567398
BTSC_BT147_L_GAGGTGAGTAATCGTC	-7.47737	11.5189	BT147_L	BT147	GSC	0.657897	0.149692	0.120387	0.447491	0.577813
BTSC_BT147_L_GAGGTGATCCAGATCA	-5.00653	15.6863	BT147_L	BT147	GSC	0.529423	0.184838	0.292029	0.33957	0.545102
BTSC_BT147_L_GAGTCCGAGCCTCGTG	-7.46999	8.45907	BT147_L	BT147	GSC	0.642787	0.180119	0.355335	0.39944	0.620716
BTSC_BT147_L_GAGTCCGGTCGGGTCT	0.153355	14.3396	BT147_L	BT147	GSC	0.55675	0.13038	0.131049	0.428864	0.422543
BTSC_BT147_L_GAGTCCGTCATCGGAT	0.332465	16.1734	BT147_L	BT147	GSC	0.583986	0.173483	0.22833	0.478174	0.646482
BTSC_BT147_L_GATCGATGTTATCCGA	-10.5239	16.258	BT147_L	BT147	GSC	0.503307	0.21015	0.193175	0.348697	0.55878
BTSC_BT147_L_GATCGATTCCGTTGTC	-19.7962	-3.40184	BT147_L	BT147	GSC	0.751707	0.205796	0.164893	0.294072	0.653955
BTSC_BT147_L_GATCGTACAATGGAAT	6.94762	19.4649	BT147_L	BT147	GSC	0.616849	0.141524	0.190063	0.514244	0.541304
BTSC_BT147_L_GATCTAGGTACTTGAC	-6.8945	11.6089	BT147_L	BT147	GSC	0.745016	0.135469	0.191829	0.476189	0.688899
BTSC_BT147_L_GATGAGGTCGTTACAG	-3.56098	13.8541	BT147_L	BT147	GSC	0.5903	0.16272	0.268577	0.274144	0.625077
BTSC_BT147_L_GATGCTACACACAGAG	-4.48032	17.7692	BT147_L	BT147	GSC	0.527569	0.130937	0.260524	0.322554	0.402513
BTSC_BT147_L_GATGCTACACCGGAAA	2.80192	21.1403	BT147_L	BT147	GSC	0.598036	0.169519	0.131887	0.490712	0.540038
BTSC_BT147_L_GATGCTATCCTAGAAC	-4.6045	22.5028	BT147_L	BT147	GSC	0.618064	0.0315297	0.159528	0.704512	0.569622
BTSC_BT147_L_GATTCAGAGACAATAC	-5.06759	8.45751	BT147_L	BT147	GSC	0.824731	0.144729	0.203306	0.517546	0.785613
BTSC_BT147_L_GCAAACTCACGAAGCA	4.04044	22.8025	BT147_L	BT147	GSC	0.446014	0.238789	0.197137	0.360531	0.582907
BTSC_BT147_L_GCAATCACATGAACCT	0.254222	12.9514	BT147_L	BT147	GSC	0.589512	0.246041	0.314427	0.428602	0.579403
BTSC_BT147_L_GCAATCATCCAAACTG	3.77671	13.3562	BT147_L	BT147	GSC	0.647209	0.183357	0.235098	0.497859	0.597895
BTSC_BT147_L_GCAATCATCCCTAATT	-5.02738	14.4536	BT147_L	BT147	GSC	0.538413	0.241187	0.392865	0.379279	0.649751
BTSC_BT147_L_GCACATAGTCTCTTTA	-7.01026	12.3832	BT147_L	BT147	GSC	0.633702	0.137372	0.0753983	0.368796	0.616748
BTSC_BT147_L_GCACATATCTCCTATA	-2.58192	10.4081	BT147_L	BT147	GSC	0.594839	0.156982	0.195861	0.336305	0.666999
BTSC_BT147_L_GCACTCTAGCTAAGAT	-9.76842	9.09731	BT147_L	BT147	GSC	0.668275	0.188301	0.199667	0.534028	0.656141
BTSC_BT147_L_GCACTCTAGGATGTAT	-19.8132	6.34462	BT147_L	BT147	GSC	0.628755	0.208758	0.186675	0.300513	0.63962
BTSC_BT147_L_GCAGCCATCGCTTAGA	3.91762	12.7726	BT147_L	BT147	GSC	0.629013	0.164833	0.258525	0.442822	0.421416
BTSC_BT147_L_GCAGTTACAGATCTGT	-9.22815	17.4543	BT147_L	BT147	GSC	0.57243	0.171202	0.229098	0.418791	0.605553
BTSC_BT147_L_GCAGTTAGTTCTGAAC	3.60468	13.1149	BT147_L	BT147	GSC	0.646792	0.180592	0.315656	0.455228	0.543783
BTSC_BT147_L_GCAGTTATCCTTCAAT	4.91187	18.7429	BT147_L	BT147	GSC	0.594726	0.179192	0.24915	0.420092	0.556922
BTSC_BT147_L_GCATGATGTCTGATCA	8.13601	20.9277	BT147_L	BT147	GSC	0.577856	0.175871	0.10397	0.438251	0.556893
BTSC_BT147_L_GCATGATTCAGATAAG	-3.6917	12.8447	BT147_L	BT147	GSC	0.503407	0.188418	0.278508	0.610564	0.518783
BTSC_BT147_L_GCATGCGGTACAGACG	-3.44611	12.2104	BT147_L	BT147	GSC	0.484258	0.185085	0.204901	0.64202	0.278785
BTSC_BT147_L_GCATGCGTCCATTCTA	-6.06997	15.4703	BT147_L	BT147	GSC	0.4748	0.224198	0.137091	0.458057	0.447163
BTSC_BT147_L_GCATGTACAAGCCATT	-8.41639	11.0388	BT147_L	BT147	GSC	0.631485	0.108661	0.20287	0.282448	0.601279
BTSC_BT147_L_GCATGTAGTCAATACC	-2.97493	16.6319	BT147_L	BT147	GSC	0.523869	0.171523	0.281031	0.291187	0.505654
BTSC_BT147_L_GCCAAATGTTCCATGA	-8.03766	13.9253	BT147_L	BT147	GSC	0.638028	0.163925	0.237416	0.318116	0.644555
BTSC_BT147_L_GCCAAATGTTGTTTGG	-6.70483	13.0282	BT147_L	BT147	GSC	0.561892	0.195777	0.217448	0.419048	0.586446
BTSC_BT147_L_GCCTCTAAGACGCTTT	1.42394	13.9288	BT147_L	BT147	GSC	0.606421	0.160314	0.217555	0.444811	0.569559
BTSC_BT147_L_GCCTCTAGTTAAGAAC	1.81113	20.8623	BT147_L	BT147	GSC	0.54616	0.100886	0.26503	0.526305	0.482456
BTSC_BT147_L_GCGACCACACATTCGA	-2.29791	13.2508	BT147_L	BT147	GSC	0.524075	0.223341	0.21149	0.4722	0.512435
BTSC_BT147_L_GCGACCAGTTGCGCAC	2.37651	17.6748	BT147_L	BT147	GSC	0.600421	0.209602	0.179267	0.388976	0.664259
BTSC_BT147_L_GCGAGAATCTATCCCG	2.42035	14.3467	BT147_L	BT147	GSC	0.613	0.153149	0.221407	0.497679	0.616384
BTSC_BT147_L_GCGCAACTCACTATTC	-0.870863	6.61433	BT147_L	BT147	GSC	0.56925	0.198868	0.252672	0.552758	0.468964
BTSC_BT147_L_GCGCAACTCTTGAGGT	-3.95405	16.0459	BT147_L	BT147	GSC	0.499154	0.292375	0.416855	0.29003	0.737074
BTSC_BT147_L_GCGCCAAAGCAACGGT	-7.71252	4.12664	BT147_L	BT147	GSC	0.760412	0.217992	0.317652	0.460313	0.763425
BTSC_BT147_L_GCGCCAACAACGATGG	-6.25557	13.8138	BT147_L	BT147	GSC	0.585046	0.167561	0.207542	0.414852	0.578837
BTSC_BT147_L_GCGCCAAGTGTGGTTT	-8.6955	14.5802	BT147_L	BT147	GSC	0.579638	0.14253	0.203229	0.419276	0.698588
BTSC_BT147_L_GCGCCAATCCTAAGTG	0.68084	13.3244	BT147_L	BT147	GSC	0.581066	0.180028	0.230328	0.343646	0.589478
BTSC_BT147_L_GCGCGATCACAAGACG	-2.231	15.0518	BT147_L	BT147	GSC	0.420333	0.182339	0.171503	0.452487	0.468245
BTSC_BT147_L_GCGGGTTTCTTCGAGA	-4.8627	11.4753	BT147_L	BT147	GSC	0.511193	0.195235	0.164565	0.454142	0.345067
BTSC_BT147_L_GCTCCTAAGTTTGCGT	-0.488675	12.8223	BT147_L	BT147	GSC	0.568653	0.153918	0.25568	0.394639	0.53861
BTSC_BT147_L_GCTCCTACACGAAACG	-9.24277	15.7032	BT147_L	BT147	GSC	0.556714	0.126016	0.237999	0.527216	0.601333
BTSC_BT147_L_GCTCTGTAGGCGACAT	-1.10198	14.8733	BT147_L	BT147	GSC	0.660174	0.131478	0.331073	0.38052	0.649185
BTSC_BT147_L_GCTCTGTGTATAATGG	-8.99797	16.0927	BT147_L	BT147	GSC	0.491688	0.181387	0.183029	0.428319	0.416522
BTSC_BT147_L_GCTGCAGAGCTTATCG	-17.1096	10.5759	BT147_L	BT147	GSC	0.653201	0.137548	0.136183	0.588768	0.571752
BTSC_BT147_L_GCTGCAGCACACATGT	-2.78737	15.5822	BT147_L	BT147	GSC	0.388222	0.181824	0.32471	0.534579	0.467587
BTSC_BT147_L_GCTGCAGTCACCAGGC	-13.009	18.0055	BT147_L	BT147	GSC	0.544203	0.187975	0.234024	0.527814	0.465974
BTSC_BT147_L_GCTGCGACAACTGGCC	-2.82129	19.9524	BT147_L	BT147	GSC	0.56369	0.185465	0.306138	0.636352	0.560511
BTSC_BT147_L_GCTGCGACAAGCCATT	-7.82255	13.0261	BT147_L	BT147	GSC	0.572436	0.252049	0.234103	0.483639	0.577783
BTSC_BT147_L_GCTGCTTAGCTGATAA	2.77314	15.2658	BT147_L	BT147	GSC	0.525066	0.190473	0.27696	0.452624	0.281388
BTSC_BT147_L_GCTGGGTCATTCTCAT	-0.549984	14.2533	BT147_L	BT147	GSC	0.567635	0.158496	0.206071	0.366507	0.635195
BTSC_BT147_L_GCTGGGTTCCTACAGA	0.330047	14.7276	BT147_L	BT147	GSC	0.564332	0.192151	0.216472	0.440516	0.731538
BTSC_BT147_L_GCTTCCACATGAGCGA	-9.19234	16.5749	BT147_L	BT147	GSC	0.524873	0.20615	0.217771	0.421715	0.494658
BTSC_BT147_L_GCTTGAAAGCTAAACA	2.1799	16.224	BT147_L	BT147	GSC	0.546546	0.227707	0.228616	0.416069	0.436256
BTSC_BT147_L_GCTTGAACATGTAAGA	-5.99343	10.501	BT147_L	BT147	GSC	0.696605	0.185132	0.198586	0.434272	0.614521
BTSC_BT147_L_GCTTGAAGTAAGTGGC	-6.63968	13.7496	BT147_L	BT147	GSC	0.546802	0.140755	0.297178	0.32414	0.556763
BTSC_BT147_L_GCTTGAAGTCAAGCGA	-8.45041	10.0249	BT147_L	BT147	GSC	0.613068	0.145002	0.260745	0.45916	0.665623
BTSC_BT147_L_GGAAAGCCAGAAGCAC	-1.50143	11.4204	BT147_L	BT147	GSC	0.326527	0.241219	0.313031	0.487195	0.416136
BTSC_BT147_L_GGAAAGCCAGGAACGT	1.06516	18.4698	BT147_L	BT147	GSC	0.574874	0.222462	0.27358	0.247174	0.447229
BTSC_BT147_L_GGAACTTGTTCCGGCA	-8.44157	12.2782	BT147_L	BT147	GSC	0.538444	0.162476	0.212706	0.52778	0.530177
BTSC_BT147_L_GGAATAAGTGCGCTTG	-9.23751	7.40283	BT147_L	BT147	GSC	0.591278	0.15833	0.253915	0.368045	0.484894
BTSC_BT147_L_GGACAAGAGTTACCCA	-9.1286	9.50428	BT147_L	BT147	GSC	0.609763	0.177018	0.135426	0.367074	0.741822
BTSC_BT147_L_GGACAAGCATAAGACA	5.02432	18.7684	BT147_L	BT147	GSC	0.577434	0.162003	0.136347	0.461258	0.512663
[truncated: 63,657 more rows]

## Sheet:  Figure 1-S1E
# Source Data Figure 1-figure supplement 1E
NAME	PC1	PC2	Sample.ID	Patient.ID	Sample.Type	FOSL1	VDR	SP100	ELF4	BNC2	OLIG2	SOX11	ASCL1	SALL2	POU3F3
BTSC_BT127_L_AAACCTGCACGGACAA	-12.7289	-0.553863	BT127_L	BT127	GSC	0	0	0	0	0	0	0	0	0	0
BTSC_BT127_L_AAACCTGCATCCGGGT	0.942554	1.60799	BT127_L	BT127	GSC	0	0	0	0	0	0	0	0	0	0
BTSC_BT127_L_AAACCTGGTACAGTTC	4.22372	17.3566	BT127_L	BT127	GSC	0	0	0	0	0	0	0	0.295726	0.280017	0
BTSC_BT127_L_AAACCTGTCTACGAGT	-14.3647	12.1673	BT127_L	BT127	GSC	0	0	0	0	0.685156	0	0.403726	0.359075	0	0
BTSC_BT127_L_AAACGGGAGTGGTAAT	7.01783	23.3358	BT127_L	BT127	GSC	0	0	0	0	0	0	0	0.140925	0	0
BTSC_BT127_L_AAACGGGCAGGACGTA	-14.798	-8.7067	BT127_L	BT127	GSC	0	0	0	0	0	0	0	0	0	0
BTSC_BT127_L_AAACGGGCATTGCGGC	-7.66853	12.8301	BT127_L	BT127	GSC	0	0	0.489599	0	0	0	0.294348	0	0	0.405605
BTSC_BT127_L_AAACGGGCATTGGTAC	-8.86602	6.50831	BT127_L	BT127	GSC	0	0	0	0	0	0	0.450438	0	0	0
BTSC_BT127_L_AAACGGGGTAGAAAGG	-12.2646	-3.45384	BT127_L	BT127	GSC	0	0	0	0	0	0	0	0	0	0
BTSC_BT127_L_AAACGGGGTTCCATGA	5.55644	18.6964	BT127_L	BT127	GSC	0	0	0	0.257942	0	0	0.229913	0	0	0
BTSC_BT127_L_AAACGGGTCAGAGCTT	0.315714	17.8603	BT127_L	BT127	GSC	0.121922	0	0	0	0	0	0	0	0	0.344077
BTSC_BT127_L_AAAGCAAAGGTGCTAG	-11.786	-4.48515	BT127_L	BT127	GSC	0	0	0	0	0	0	0	0	0	0
BTSC_BT127_L_AAAGCAATCAGCAACT	-10.3305	12.1176	BT127_L	BT127	GSC	0.211404	0	0	0	0	0	0	0	0	0.26705
BTSC_BT127_L_AAAGTAGAGCCGTCGT	-1.89408	12.3432	BT127_L	BT127	GSC	0	0	0	0	0	0	0	0.288751	0	0.177165
BTSC_BT127_L_AAAGTAGCAAGGTGTG	-13.6067	-2.61226	BT127_L	BT127	GSC	0	0	0	0	0	0	0	0	0	0
BTSC_BT127_L_AAAGTAGCATGCCACG	-3.31805	14.3391	BT127_L	BT127	GSC	0.163464	0	0.249253	0	0	0.16274	0	0	0	0
BTSC_BT127_L_AAATGCCCAGGAATGC	-9.86994	8.86147	BT127_L	BT127	GSC	0	0	0	0	0	0	0	0	0	0
BTSC_BT127_L_AAATGCCGTCCCTACT	-5.85496	12.0622	BT127_L	BT127	GSC	0.246027	0	0	0	0	0.244937	0	0.233676	0	0
BTSC_BT127_L_AAATGCCTCCCAAGTA	-6.98064	6.70303	BT127_L	BT127	GSC	0	0	0	0	0	0.220114	0	0.407931	0	0
BTSC_BT127_L_AACACGTAGACGCAAC	-16.187	28.4547	BT127_L	BT127	GSC	0	0	0	0	0	0.214698	0.197694	0.204828	0	0
BTSC_BT127_L_AACACGTAGACTGTAA	-7.14248	7.27106	BT127_L	BT127	GSC	0	0	0	0	0	0.182625	0	0	0	0.231723
BTSC_BT127_L_AACACGTAGAGCCTAG	-5.10078	17.9129	BT127_L	BT127	GSC	0	0	0	0	0	0	0.168353	0.279546	0	0.371793
BTSC_BT127_L_AACACGTAGGGTCGAT	-12.4543	10.712	BT127_L	BT127	GSC	0	0	0	0	0	0	0.497237	0	0	0.4859
BTSC_BT127_L_AACCATGCATAACCTG	-20.4604	10.7729	BT127_L	BT127	GSC	0	0	0	0	0	0.376455	0	0	0	0
BTSC_BT127_L_AACCGCGGTTTGTTTC	-5.03406	8.39548	BT127_L	BT127	GSC	0	0	0	0	0	0	0	0	0	0.253174
BTSC_BT127_L_AACCGCGTCTTAGAGC	-11.5467	6.47971	BT127_L	BT127	GSC	0	0	0	0	0	0.170158	0.253864	0	0.243788	0
BTSC_BT127_L_AACGTTGGTCATACTG	-3.05487	17.0785	BT127_L	BT127	GSC	0.130054	0	0	0	0	0.129478	0	0.467206	0	0.164288
BTSC_BT127_L_AACTCAGCACCCATGG	-13.8833	0.976184	BT127_L	BT127	GSC	0	0	0.568811	0	0	0	0	0	0	0
BTSC_BT127_L_AACTCCCAGAGGTTAT	-10.083	1.38186	BT127_L	BT127	GSC	0	0	0	0	0	0	0	0	0	0
BTSC_BT127_L_AACTCCCAGCCACGTC	-15.6162	3.08957	BT127_L	BT127	GSC	0	0	0	0	0	0	0	0.506154	0	0
BTSC_BT127_L_AACTCCCGTTACGCGC	-14.3539	9.61171	BT127_L	BT127	GSC	0	0	0	0	0	0	0	0	0	0.29344
BTSC_BT127_L_AACTCTTTCACGGTTA	-7.35166	11.2371	BT127_L	BT127	GSC	0	0	0	0	0	0.662414	0	0	0	0
BTSC_BT127_L_AACTCTTTCTGAGGGA	-13.8832	-10.1192	BT127_L	BT127	GSC	0	0	0	0	0	0	0	0	0	0
BTSC_BT127_L_AACTGGTCATTGGGCC	-6.61332	10.7797	BT127_L	BT127	GSC	0	0	0	0	0	0	0.106776	0.110628	0	0.331825
BTSC_BT127_L_AACTGGTGTTTGTGTG	-13.453	9.46632	BT127_L	BT127	GSC	0.252809	0	0	0	0	0	0.231756	0	0	0
BTSC_BT127_L_AACTTTCAGCGAGAAA	-13.8402	11.7233	BT127_L	BT127	GSC	0.146765	0	0	0	0	0.0823796	0.0758553	0.188998	0	0.104527
BTSC_BT127_L_AACTTTCCAGTCTTCC	0.941211	18.3895	BT127_L	BT127	GSC	0.166485	0	0	0	0	0.269605	0.152621	0.386542	0.23747	0.342087
BTSC_BT127_L_AAGACCTCAAGCCATT	-16.6218	9.2138	BT127_L	BT127	GSC	0	0	0	0	0	0	0	0	0	0.4801
BTSC_BT127_L_AAGACCTCACAAGCCC	0.116621	14.1977	BT127_L	BT127	GSC	0	0	0	0.152881	0	0	0	0.085676	0	0.113948
BTSC_BT127_L_AAGACCTGTACAAGTA	0.330725	13.4514	BT127_L	BT127	GSC	0	0	0	0	0	0.27567	0	0.441089	0	0.215877
BTSC_BT127_L_AAGACCTTCAAGAAGT	-9.84631	13.1461	BT127_L	BT127	GSC	0.0869004	0	0.132507	0.147282	0	0.0865155	0.0796636	0.27686	0	0.109775
BTSC_BT127_L_AAGACCTTCATCGGAT	-9.09319	7.02008	BT127_L	BT127	GSC	0	0	0	0	0	0	0.296394	0.307089	0	0.408424
BTSC_BT127_L_AAGCCGCCAATGTAAG	-22.1823	14.5911	BT127_L	BT127	GSC	0	0	0	0	0	0.300631	0	0	0	0.381454
BTSC_BT127_L_AAGCCGCGTCAATACC	-11.1532	17.4956	BT127_L	BT127	GSC	0	0	0	0	0	0.340057	0	0	0.31273	0
BTSC_BT127_L_AAGGAGCAGACTGTAA	-2.93704	15.1965	BT127_L	BT127	GSC	0	0	0	0	0	0.345308	0.267439	0	0	0.282093
BTSC_BT127_L_AAGGAGCCAACCGCCA	-8.54203	19.7039	BT127_L	BT127	GSC	0	0	0	0	0	0	0.440529	0	0	0
BTSC_BT127_L_AAGGAGCCAAGCTGAG	-11.701	12.6156	BT127_L	BT127	GSC	0	0	0	0	0	0.359958	0.33145	0	0	0
BTSC_BT127_L_AAGGAGCCAGTATGCT	-13.2418	-7.8933	BT127_L	BT127	GSC	0	0	0	0	0	0	0	0	0	0
BTSC_BT127_L_AAGGCAGAGAGACTTA	-6.50608	13.4014	BT127_L	BT127	GSC	0	0	0	0	0	0.218136	0.20086	0	0	0
BTSC_BT127_L_AAGGCAGCATTGGCGC	-5.9253	10.6359	BT127_L	BT127	GSC	0	0	0	0	0	0.285122	0	0.16889	0	0
BTSC_BT127_L_AAGGCAGGTAAGTAGT	-7.60951	1.27815	BT127_L	BT127	GSC	0	0	0	0	0	0	0	0	0	0
BTSC_BT127_L_AAGGCAGGTCATATCG	-4.45064	11.3824	BT127_L	BT127	GSC	0.147696	0	0	0	0	0	0	0.140282	0.210669	0
BTSC_BT127_L_AAGGCAGGTCCGCTGA	-8.10005	8.29876	BT127_L	BT127	GSC	0.25895	0	0	0	0	0.157282	0	0	0	0.199566
BTSC_BT127_L_AAGGCAGGTGCCTGCA	-9.11024	8.95294	BT127_L	BT127	GSC	0.314822	0	0	0	0	0	0	0	0	0
BTSC_BT127_L_AAGGCAGTCCTGCTTG	-2.74005	13.0273	BT127_L	BT127	GSC	0	0	0	0	0	0	0.188666	0.307692	0	0.259978
BTSC_BT127_L_AAGGCAGTCGGCGGTT	-7.33896	4.16305	BT127_L	BT127	GSC	0	0	0	0	0	0	0	0	0	0
BTSC_BT127_L_AAGGTTCCAATAGCGG	-15.6696	20.2329	BT127_L	BT127	GSC	0	0	0	0	0	0	0	0	0	0.673067
BTSC_BT127_L_AAGGTTCCACATTTCT	-13.9643	4.87633	BT127_L	BT127	GSC	0	0	0	0	0	0	0	0	0	0
BTSC_BT127_L_AAGGTTCCATGCTAGT	-12.9092	9.23631	BT127_L	BT127	GSC	0	0	0	0	0	0	0.291499	0.532379	0	0.40168
BTSC_BT127_L_AAGGTTCGTCGTCTTC	1.02411	19.279	BT127_L	BT127	GSC	0.285391	0	0	0	0	0	0.261624	0.271064	0	0
BTSC_BT127_L_AAGGTTCTCAAACCAC	-7.98054	13.9615	BT127_L	BT127	GSC	0	0	0	0	0	0	0	0	0	0
BTSC_BT127_L_AAGGTTCTCTTGAGGT	-13.0736	-7.46277	BT127_L	BT127	GSC	0	0	0	0	0	0	0	0	0	0
BTSC_BT127_L_AAGTCTGCAACACCTA	-19.5615	13.2858	BT127_L	BT127	GSC	0	0	0	0	0	0.479612	0	0.245365	0	0
BTSC_BT127_L_AAGTCTGCAGCCTATA	-10.0906	10.1475	BT127_L	BT127	GSC	0	0	0	0	0	0.449994	0	0.68657	0	0
BTSC_BT127_L_AATCCAGAGACAATAC	1.36723	13.1058	BT127_L	BT127	GSC	0.14229	0	0.216965	0	0	0.141659	0.281844	0.135147	0.202958	0
BTSC_BT127_L_AATCCAGAGTACGCGA	-10.2397	10.8272	BT127_L	BT127	GSC	0	0	0	0	0	0	0	0.199442	0	0
BTSC_BT127_L_AATCCAGGTCATATCG	-1.46074	16.1609	BT127_L	BT127	GSC	0.334617	0	0	0	0	0	0.306751	0	0	0
BTSC_BT127_L_AATCCAGGTTGTCTTT	-6.9242	2.89324	BT127_L	BT127	GSC	0	0	0	0	0	0	0	0	0	0
BTSC_BT127_L_AATCGGTAGAGTCGGT	-12.8721	12.6371	BT127_L	BT127	GSC	0	0	0	0	0	0	0	0.376578	0	0
BTSC_BT127_L_AATCGGTCATGTTGAC	-6.89198	9.67307	BT127_L	BT127	GSC	0	0	0	0	0	0	0	0	0	0
BTSC_BT127_L_ACACCAAGTAAAGTCA	4.23111	18.7377	BT127_L	BT127	GSC	0	0	0	0	0	0.153924	0.233039	0	0.362597	0.321123
BTSC_BT127_L_ACACCAAGTATAATGG	1.59204	14.8142	BT127_L	BT127	GSC	0	0	0	0	0	0	0.190046	0	0	0
BTSC_BT127_L_ACACCAATCCACTGGG	-4.69785	17.6838	BT127_L	BT127	GSC	0	0	0	0	0	0	0	0	0	0
BTSC_BT127_L_ACACCAATCTGCGGCA	-9.19401	11.5028	BT127_L	BT127	GSC	0	0	0	0	0	0	0	0	0	0.288184
BTSC_BT127_L_ACACCCTAGGATATAC	4.09817	8.50787	BT127_L	BT127	GSC	0.13736	0	0.209449	0	0	0.136752	0	0	0	0.290025
BTSC_BT127_L_ACACCCTGTTAAGGGC	-16.9659	-14.9998	BT127_L	BT127	GSC	0	0	0	0	0	0	0	0	0	0
BTSC_BT127_L_ACACCCTTCCAAACTG	-14.1015	-9.7001	BT127_L	BT127	GSC	0	0	0	0	0	0	0	0	0	0
BTSC_BT127_L_ACACCCTTCTGATACG	-13.7188	-7.42742	BT127_L	BT127	GSC	0	0	0	0	0	0	0	0	0	0
BTSC_BT127_L_ACACCGGAGACTGGGT	-8.58204	14.9132	BT127_L	BT127	GSC	0	0	0	0	0	0.231616	0	0.220968	0	0
BTSC_BT127_L_ACACCGGAGTGAAGTT	-7.11768	13.9955	BT127_L	BT127	GSC	0	0	0	0	0	0.186654	0.171871	0	0	0
BTSC_BT127_L_ACACCGGGTAGAGGAA	4.51713	12.8163	BT127_L	BT127	GSC	0	0	0	0	0	0.131188	0	0	0	0.166457
BTSC_BT127_L_ACACCGGTCGTGGTCG	-4.39625	1.26758	BT127_L	BT127	GSC	0	0	0	0	0	0	0	0	0	0
BTSC_BT127_L_ACACTGAAGTGCAAGC	-9.86288	10.2422	BT127_L	BT127	GSC	0	0	0	0	0	0	0	0.379896	0	0
BTSC_BT127_L_ACAGCCGCACGTGAGA	-0.233071	18.2372	BT127_L	BT127	GSC	0	0	0	0	0	0.260716	0	0.152036	0	0
BTSC_BT127_L_ACAGCCGGTAGAGTGC	-13.8358	13.3611	BT127_L	BT127	GSC	0	0	0	0	0	0	0	0.243331	0	0.417022
BTSC_BT127_L_ACAGCCGTCTCCAACC	-0.571862	5.41868	BT127_L	BT127	GSC	0.271222	0	0	0	0	0	0	0.47417	0	0
BTSC_BT127_L_ACAGCTACATCGGTTA	-7.67866	13.084	BT127_L	BT127	GSC	0	0	0.311695	0	0	0	0.187392	0	0.45946	0
BTSC_BT127_L_ACATACGCAGCCAATT	0.340667	23.0266	BT127_L	BT127	GSC	0	0	0	0	0	0.341706	0.245272	0.155903	0	0.207349
BTSC_BT127_L_ACATCAGCAGCCAATT	-9.71929	10.3269	BT127_L	BT127	GSC	0	0	0	0	0	0	0	0	0	0
BTSC_BT127_L_ACATCAGTCCTTGACC	-10.3636	1.31615	BT127_L	BT127	GSC	0	0	0.228007	0	0.232633	0	0	0.30346	0	0.403598
BTSC_BT127_L_ACATGGTCAAGCTGTT	-5.66188	14.2044	BT127_L	BT127	GSC	0.261773	0	0.399155	0	0	0	0	0.248632	0	0
BTSC_BT127_L_ACCAGTACATGGTCTA	-2.02647	13.3783	BT127_L	BT127	GSC	0	0	0	0	0	0.115858	0	0	0	0
BTSC_BT127_L_ACCAGTAGTAGGGACT	-7.49638	0.09143	BT127_L	BT127	GSC	0.172238	0	0.262631	0	0	0.171475	0.157894	0	0	0
BTSC_BT127_L_ACCAGTAGTATCACCA	-16.7948	10.919	BT127_L	BT127	GSC	0	0	0.549954	0	0	0.359072	0	0	0	0
BTSC_BT127_L_ACCAGTATCCTATGTT	-19.2745	-4.42259	BT127_L	BT127	GSC	0	0	0	0	0	0	0	0	0	0
BTSC_BT127_L_ACCAGTATCGCGTAGC	-11.0013	10.017	BT127_L	BT127	GSC	0	0	0	0	0	0.226224	0.208308	0.334245	0.324116	0.444542
BTSC_BT127_L_ACCAGTATCTAAGCCA	-9.46441	22.1006	BT127_L	BT127	GSC	0	0	0	0	0	0	0	0	0	0.381054
BTSC_BT127_L_ACCCACTAGTGTGAAT	-11.364	8.37452	BT127_L	BT127	GSC	0	0	0.234158	0	0	0.152885	0	0	0.360497	0.319264
BTSC_BT127_L_ACCCACTCACGAGGTA	-9.92047	8.07237	BT127_L	BT127	GSC	0	0	0	0	0	0	0	0.442167	0	0
BTSC_BT127_L_ACCCACTGTAAATACG	-20.2894	-1.15394	BT127_L	BT127	GSC	0	0	0	0	0	0	0	0	0	0
BTSC_BT127_L_ACCCACTGTTCTGGTA	-14.1657	19.3506	BT127_L	BT127	GSC	0	0	0	0	0	0	0.26644	0.276054	0	0
BTSC_BT127_L_ACCCACTTCTAGAGTC	-14.2183	11.4487	BT127_L	BT127	GSC	0	0	0	0	0	0	0	0.243425	0	0
BTSC_BT127_L_ACCGTAATCTCGGACG	-2.05312	8.89147	BT127_L	BT127	GSC	0.274613	0	0	0	0	0	0	0.260828	0	0
BTSC_BT127_L_ACCTTTAGTCAAAGCG	-12.2216	8.50284	BT127_L	BT127	GSC	0.444724	0	0	0	0	0	0	0	0	0
BTSC_BT127_L_ACCTTTATCAGAGACG	1.92462	16.4801	BT127_L	BT127	GSC	0	0	0	0	0	0.143902	0	0.137287	0	0.182589
BTSC_BT127_L_ACGAGCCAGAGAACAG	-1.43775	11.811	BT127_L	BT127	GSC	0.157336	0	0.239908	0	0	0	0.236555	0.149438	0	0
BTSC_BT127_L_ACGAGCCCACAAGCCC	-13.4751	19.0578	BT127_L	BT127	GSC	0	0	0	0	0	0	0	0	0	0.276066
BTSC_BT127_L_ACGAGCCCAGCGATCC	-12.0836	10.6356	BT127_L	BT127	GSC	0	0	0	0	0	0.167463	0.1542	0	0	0
BTSC_BT127_L_ACGAGCCTCTCGTATT	-11.9083	4.84846	BT127_L	BT127	GSC	0	0	0	0	0	0	0	0	0	0
BTSC_BT127_L_ACGAGGACAGCGTTCG	-9.86075	10.3523	BT127_L	BT127	GSC	0	0	0	0	0	0	0	0	0	0
BTSC_BT127_L_ACGATACCAAGCCGCT	-13.9937	11.3548	BT127_L	BT127	GSC	0	0	0	0	0	0.545112	0	0.520052	0	0
BTSC_BT127_L_ACGATACCACCAGGCT	-12.5289	15.998	BT127_L	BT127	GSC	0.183892	0	0	0	0	0.434306	0	0.707549	0	0
BTSC_BT127_L_ACGATACTCCAGTAGT	-13.0892	6.95583	BT127_L	BT127	GSC	0	0	0.314695	0	0	0	0.189195	0	0	0
BTSC_BT127_L_ACGATACTCCATGCTC	1.57143	8.49653	BT127_L	BT127	GSC	0.173626	0	0.264747	0	0	0	0	0	0	0
BTSC_BT127_L_ACGCAGCTCGTTTAGG	-16.9589	-9.5021	BT127_L	BT127	GSC	0	0	0	0	0	0	0.620493	0	0	0
BTSC_BT127_L_ACGCCAGAGTATGACA	-16.441	5.23955	BT127_L	BT127	GSC	0	0	0	0	0	0	0	0	0	0
BTSC_BT127_L_ACGCCAGCATGCCACG	-7.54215	8.03906	BT127_L	BT127	GSC	0	0	0	0	0	0	0	0	0	0
BTSC_BT127_L_ACGGAGAAGAAGAAGC	6.12768	9.8744	BT127_L	BT127	GSC	0.196018	0	0	0	0	0.19515	0	0	0	0
BTSC_BT127_L_ACGGAGAAGACCTAGG	-3.15086	29.2857	BT127_L	BT127	GSC	0	0	0	0	0	0	0.281152	0	0	0.243583
BTSC_BT127_L_ACGGAGACAGGTCGTC	-5.52281	13.6152	BT127_L	BT127	GSC	0	0	0	0	0	0	0	0	0	0.406676
BTSC_BT127_L_ACGGAGACATCAGTAC	-19.199	6.36036	BT127_L	BT127	GSC	0	0	0	0	0	0	0	0	0	0
BTSC_BT127_L_ACGGAGAGTCGAAAGC	-7.46902	14.7366	BT127_L	BT127	GSC	0	0	0	0	0	0	0	0	0	0
BTSC_BT127_L_ACGGCCAAGAAAGTGG	-14.8242	6.63888	BT127_L	BT127	GSC	0.476358	0	0	0	0	0	0	0	0	0
BTSC_BT127_L_ACGGCCAAGGGAAACA	-9.21829	9.69217	BT127_L	BT127	GSC	0	0	0	0	0	0	0.197946	0	0	0
BTSC_BT127_L_ACGGCCAAGGTAGCCA	-1.76684	7.85124	BT127_L	BT127	GSC	0.372305	0	0	0	0	0	0.167469	0.173511	0	0
BTSC_BT127_L_ACGGCCACAAGGTTCT	-13.0985	5.49914	BT127_L	BT127	GSC	0	0	0	0	0	0	0	0	0	0
BTSC_BT127_L_ACGGCCATCACGCGGT	-4.18088	13.9072	BT127_L	BT127	GSC	0	0	0	0	0	0.203281	0.295014	0	0	0.257932
BTSC_BT127_L_ACGGCCATCGTCTGCT	-12.8311	11.187	BT127_L	BT127	GSC	0	0	0	0	0	0	0	0	0	0
BTSC_BT127_L_ACGGCCATCTGGAGCC	-17.5007	0.00483672	BT127_L	BT127	GSC	0	0	0	0	0	0	0	0	0	0
BTSC_BT127_L_ACGGGCTCATGGTAGG	-16.2215	3.72109	BT127_L	BT127	GSC	0	0	0	0	0	0	0	0	0	0.543929
BTSC_BT127_L_ACGGGCTTCGCCTGTT	-18.9225	6.53538	BT127_L	BT127	GSC	0	0	0	0	0	0	0.394226	0	0	0
BTSC_BT127_L_ACGGGCTTCTAACTGG	-5.61707	9.61409	BT127_L	BT127	GSC	0	0	0	0	0	0.171969	0	0	0	0
BTSC_BT127_L_ACGGGTCAGTAAGTAC	-9.29762	12.9623	BT127_L	BT127	GSC	0	0	0	0	0	0	0	0.25729	0.386387	0.342192
BTSC_BT127_L_ACGGGTCAGTTAGCGG	-7.14338	14.0828	BT127_L	BT127	GSC	0	0	0	0	0	0.227027	0	0.335234	0	0
BTSC_BT127_L_ACGGGTCCACAGCGTC	0.20848	9.04429	BT127_L	BT127	GSC	0	0	0.369305	0	0	0	0.222027	0.352448	0	0.305948
BTSC_BT127_L_ACGTCAAAGTCCGGTC	-17.9118	1.97633	BT127_L	BT127	GSC	0	0	0	0	0	0	0	0	0	0
BTSC_BT127_L_ACGTCAACACGGTAGA	-1.50883	8.67923	BT127_L	BT127	GSC	0	0	0	0	0	0	0	0.411513	0	0
BTSC_BT127_L_ACGTCAAGTAGTGAAT	-2.63054	11.5593	BT127_L	BT127	GSC	0.163012	0	0	0	0	0	0.149437	0	0	0.20592
BTSC_BT127_L_ACTATCTAGCAATCTC	-10.8891	17.9754	BT127_L	BT127	GSC	0	0	0	0	0	0.325597	0	0	0.466489	0.413132
BTSC_BT127_L_ACTATCTCATACGCCG	1.72305	6.51748	BT127_L	BT127	GSC	0.252809	0	0	0	0	0.152936	0	0.145905	0	0
BTSC_BT127_L_ACTATCTGTGAGTGAC	6.19244	15.8768	BT127_L	BT127	GSC	0.130711	0	0	0	0	0	0.20161	0.273291	0	0.277815
BTSC_BT127_L_ACTGAACAGCCGCCTA	-6.55405	7.94796	BT127_L	BT127	GSC	0	0	0	0	0	0	0	0	0	0
BTSC_BT127_L_ACTGAACAGTTACCCA	-12.3668	8.50085	BT127_L	BT127	GSC	0	0	0	0	0	0	0	0.345721	0	0
BTSC_BT127_L_ACTGAACCATACTACG	-1.90032	12.6714	BT127_L	BT127	GSC	0	0	0	0	0	0	0	0	0	0.205944
BTSC_BT127_L_ACTGAGTAGTACATGA	-4.922	12.5574	BT127_L	BT127	GSC	0	0	0	0	0	0.213984	0	0	0	0
BTSC_BT127_L_ACTGAGTGTTAAGGGC	-11.1667	12.26	BT127_L	BT127	GSC	0	0	0	0	0	0	0	0	0	0
BTSC_BT127_L_ACTGATGGTACATCCA	-11.4058	9.05572	BT127_L	BT127	GSC	0	0	0.521183	0	0	0	0	0.324643	0	0
BTSC_BT127_L_ACTGCTCCACATCTTT	-12.8152	0.321735	BT127_L	BT127	GSC	0	0	0	0	0	0	0	0	0	0
BTSC_BT127_L_ACTGCTCCATGATCCA	-6.446	9.77591	BT127_L	BT127	GSC	0	0	0	0	0	0	0.519533	0.385564	0	0
BTSC_BT127_L_ACTGCTCTCGTAGGTT	3.12961	14.3479	BT127_L	BT127	GSC	0.162219	0	0	0	0	0.397835	0	0.323069	0	0
BTSC_BT127_L_ACTGTCCAGGAGTCTG	-15.8626	-7.27337	BT127_L	BT127	GSC	0	0	0	0	0	0	0.823347	0	0	0
BTSC_BT127_L_ACTGTCCAGGGCACTA	-7.27148	11.7373	BT127_L	BT127	GSC	0	0	0	0	0	0	0	0	0	0
BTSC_BT127_L_ACTGTCCCAATGCCAT	4.23159	7.69772	BT127_L	BT127	GSC	0.130139	0	0	0	0	0	0	0	0	0.276758
BTSC_BT127_L_ACTGTCCCATACAGCT	-16.592	12.2243	BT127_L	BT127	GSC	0	0	0	0	0	0	0	0	0	0
BTSC_BT127_L_ACTGTCCGTCTGCCAG	-8.06584	22.3956	BT127_L	BT127	GSC	0	0	0	0	0	0	0	0.280005	0	0.372403
BTSC_BT127_L_ACTTACTAGACGCAAC	-13.5591	6.04021	BT127_L	BT127	GSC	0	0	0	0	0	0	0.304504	0.315492	0	0
BTSC_BT127_L_ACTTACTAGAGACTAT	-14.0264	-2.77272	BT127_L	BT127	GSC	0	0	0	0	0	0	0	0	0	0
BTSC_BT127_L_ACTTACTAGGTGCTAG	-12.7255	13.6309	BT127_L	BT127	GSC	0	0	0.324753	0	0	0	0.195243	0.202288	0	0
BTSC_BT127_L_ACTTACTTCAAACAAG	-6.42633	8.13431	BT127_L	BT127	GSC	0	0	0	0	0	0	0	0	0	0
BTSC_BT127_L_ACTTGTTAGTCCAGGA	-6.64574	-3.31146	BT127_L	BT127	GSC	0	0	0	0	0	0	0	0	0	0
BTSC_BT127_L_ACTTGTTGTACAGCAG	-12.1584	13.8799	BT127_L	BT127	GSC	0	0	0	0	0	0	0.262368	0.404549	0	0.361538
BTSC_BT127_L_ACTTGTTTCGGCATCG	-3.574	7.67444	BT127_L	BT127	GSC	0.258862	0	0	0	0	0.257715	0	0	0	0
BTSC_BT127_L_ACTTTCATCTAACCGA	-6.8205	9.34804	BT127_L	BT127	GSC	0	0	0	0	0	0	0	0	0	0.22135
BTSC_BT127_L_AGAATAGCACCAGCAC	-12.9277	12.4158	BT127_L	BT127	GSC	0.345595	0	0	0	0	0.344064	0.316815	0	0	0
BTSC_BT127_L_AGAATAGCATCCCATC	1.88046	23.3422	BT127_L	BT127	GSC	0	0	0	0	0	0.296711	0.170867	0.177032	0	0
BTSC_BT127_L_AGAATAGCATCGATTG	-15.6632	-5.57028	BT127_L	BT127	GSC	0	0	0	0	0	0	0	0	0	0
BTSC_BT127_L_AGAATAGCATGACGGA	-20.0881	2.61959	BT127_L	BT127	GSC	0	0	0.691645	0	0	0	0	0	0	0
BTSC_BT127_L_AGAATAGGTCCGTGAC	-3.36026	3.68107	BT127_L	BT127	GSC	0	0	0	0	0	0	0.570375	0	0	0.575136
BTSC_BT127_L_AGAATAGGTCGCTTCT	-13.8686	-2.29194	BT127_L	BT127	GSC	0	0	0	0	0	0	0	0	0	0
BTSC_BT127_L_AGAATAGGTCTAGAGG	-16.8707	-4.22406	BT127_L	BT127	GSC	0	0	0	0	0	0	0	0	0	0
BTSC_BT127_L_AGAATAGGTTAAGAAC	-2.88016	10.1749	BT127_L	BT127	GSC	0	0	0	0	0	0	0	0	0	0
BTSC_BT127_L_AGAATAGTCATTTGGG	-15.0214	9.62846	BT127_L	BT127	GSC	0	0	0	0	0	0	0	0	0	0
BTSC_BT127_L_AGAATAGTCGTTTGCC	-3.82474	-0.43888	BT127_L	BT127	GSC	0	0	0	0	0	0	0	0.17486	0	0
BTSC_BT127_L_AGACGTTCATCGACGC	-18.8085	-9.73063	BT127_L	BT127	GSC	0.588734	0	0	0	0	0.586126	0	0	0	0
BTSC_BT127_L_AGAGCGAAGCCACGCT	-15.0193	-2.04217	BT127_L	BT127	GSC	0	0	0	0	0	0	0.63046	0	0	0
BTSC_BT127_L_AGAGCGACATCCTAGA	-3.97753	8.11222	BT127_L	BT127	GSC	0.135263	0	0	0	0	0	0.169186	0	0	0.0954973
BTSC_BT127_L_AGAGCTTCAAACGCGA	-14.4577	-10.582	BT127_L	BT127	GSC	0.762244	0	0	0	0	0	0	0	0	0
BTSC_BT127_L_AGAGCTTCACACAGAG	-13.0574	5.53258	BT127_L	BT127	GSC	0	0	0	0	0	0	0	0	0	0
BTSC_BT127_L_AGAGCTTCAGTATAAG	-4.00408	4.50133	BT127_L	BT127	GSC	0.34866	0	0	0	0	0.223719	0	0	0	0
BTSC_BT127_L_AGAGTGGAGAGGTAGA	-11.7757	9.23237	BT127_L	BT127	GSC	0	0	0	0	0	0	0	0	0	0
BTSC_BT127_L_AGAGTGGAGATGTCGG	-8.45061	8.60474	BT127_L	BT127	GSC	0	0	0	0	0	0	0	0	0	0
BTSC_BT127_L_AGAGTGGAGGAGTCTG	-12.0353	13.9892	BT127_L	BT127	GSC	0	0	0	0	0	0	0	0.517942	0	0
BTSC_BT127_L_AGAGTGGCACGCATCG	-8.42788	15.3215	BT127_L	BT127	GSC	0	0	0	0.202194	0	0.118772	0.186177	0.113312	0	0
BTSC_BT127_L_AGATCTGCAGCTGTGC	-15.6689	5.17249	BT127_L	BT127	GSC	0	0	0	0	0	0	0	0	0	0
BTSC_BT127_L_AGATCTGCATTGAGCT	-9.58757	6.61975	BT127_L	BT127	GSC	0.354877	0	0	0	0	0	0	0	0	0.44829
BTSC_BT127_L_AGATCTGTCTACTTAC	-7.77421	11.0574	BT127_L	BT127	GSC	0	0	0	0	0	0	0	0	0	0
BTSC_BT127_L_AGATTGCAGCCCAATT	-17.7331	3.52711	BT127_L	BT127	GSC	0	0	0	0	0	0	0	0	0	0
BTSC_BT127_L_AGATTGCAGCGCTCCA	-6.78901	5.24743	BT127_L	BT127	GSC	0	0	0	0	0	0	0	0	0	0
BTSC_BT127_L_AGATTGCCAAACAACA	-0.215095	15.0408	BT127_L	BT127	GSC	0.170936	0	0.422304	0	0	0.0976868	0.156701	0	0	0.289098
BTSC_BT127_L_AGATTGCGTTACGTCA	-3.68237	17.0957	BT127_L	BT127	GSC	0	0	0	0	0	0	0	0	0	0
BTSC_BT127_L_AGATTGCTCACTCTTA	-3.13385	16.4838	BT127_L	BT127	GSC	0.148279	0	0	0	0	0.147622	0.224825	0	0	0.400984
BTSC_BT127_L_AGCAGCCAGCCCAATT	-12.6545	-1.95947	BT127_L	BT127	GSC	0	0	0	0	0	0	0	0	0	0
BTSC_BT127_L_AGCAGCCAGGAGCGAG	-19.2995	-9.33478	BT127_L	BT127	GSC	0	0	0	0	0	0	0	0	0	0
BTSC_BT127_L_AGCAGCCCATACTCTT	-4.37417	6.50398	BT127_L	BT127	GSC	0.151092	0	0	0	0	0	0	0	0.215513	0
BTSC_BT127_L_AGCATACAGGGCACTA	-2.86774	10.1417	BT127_L	BT127	GSC	0	0	0	0	0	0.334104	0	0	0	0.423926
BTSC_BT127_L_AGCATACAGTTTAGGA	-11.1938	16.7574	BT127_L	BT127	GSC	0	0	0	0	0	0	0.221366	0.594272	0	0
BTSC_BT127_L_AGCATACCAAAGCGGT	-15.5868	1.22073	BT127_L	BT127	GSC	0	0	0	0	0	0	0	0	0	0
BTSC_BT127_L_AGCATACGTACGCTGC	-14.2238	11.0829	BT127_L	BT127	GSC	0.184093	0	0	0	0	0	0.207199	0.307723	0	0
BTSC_BT127_L_AGCATACTCACTGGGC	-12.6691	11.2917	BT127_L	BT127	GSC	0	0	0	0	0.444143	0	0.26171	0	0	0
BTSC_BT127_L_AGCCTAAAGGCCCGTT	-5.62676	10.2202	BT127_L	BT127	GSC	0.217453	0	0	0	0	0.12845	0.199344	0.576905	0	0.162983
BTSC_BT127_L_AGCCTAAGTACGAAAT	-7.8401	15.2365	BT127_L	BT127	GSC	0	0	0	0	0	0.297035	0.27351	0	0	0.376891
BTSC_BT127_L_AGCCTAAGTCGCATAT	-4.21027	8.61542	BT127_L	BT127	GSC	0.318282	0	0	0	0	0	0.136403	0	0	0
BTSC_BT127_L_AGCCTAATCCGAAGAG	-8.89744	-4.04069	BT127_L	BT127	GSC	0.158117	0	0.137093	0	0	0	0.0824207	0	0.225533	0.199737
BTSC_BT127_L_AGCCTAATCTGCAAGT	-6.7212	10.8723	BT127_L	BT127	GSC	0	0	0	0	0	0.208008	0	0.198446	0	0
BTSC_BT127_L_AGCGGTCAGAAGATTC	-13.986	10.9161	BT127_L	BT127	GSC	0	0	0	0	0	0	0	0	0	0
BTSC_BT127_L_AGCGGTCTCCACTGGG	7.05802	19.447	BT127_L	BT127	GSC	0	0	0	0	0	0	0.150966	0	0	0.208028
BTSC_BT127_L_AGCGTATAGCGAGAAA	-2.32559	12.1522	BT127_L	BT127	GSC	0.35215	0	0.258851	0	0	0.169007	0	0.161237	0	0.347805
BTSC_BT127_L_AGCGTATAGCTGCAAG	-15.2905	11.8496	BT127_L	BT127	GSC	0	0	0	0	0	0	0.492088	0	0	0
BTSC_BT127_L_AGCGTATGTGATAAGT	-6.0438	9.16689	BT127_L	BT127	GSC	0	0	0.184919	0	0	0	0	0.307965	0	0
BTSC_BT127_L_AGCGTATTCAGCAACT	-12.4066	-5.81392	BT127_L	BT127	GSC	0	0	0	0	0	0	0	0	0	0
BTSC_BT127_L_AGCGTCGCATAAAGGT	-1.13566	10.357	BT127_L	BT127	GSC	0	0	0	0	0	0	0	0	0	0
BTSC_BT127_L_AGCGTCGTCCTAGTGA	-8.16946	13.1859	BT127_L	BT127	GSC	0	0	0	0	0.498097	0	0.293502	0	0	0
BTSC_BT127_L_AGCGTCGTCGGAGGTA	-13.2815	1.03538	BT127_L	BT127	GSC	0	0	0	0	0	0	0	0	0	0
BTSC_BT127_L_AGCTCCTTCAATACCG	-4.45763	12.6413	BT127_L	BT127	GSC	0	0	0	0	0	0.215849	0.198754	0.321405	0	0
BTSC_BT127_L_AGCTCCTTCATGCTCC	-8.90938	10.5753	BT127_L	BT127	GSC	0	0	0	0	0	0.202553	0	0	0	0
BTSC_BT127_L_AGCTCCTTCGTCACGG	-13.3861	7.5787	BT127_L	BT127	GSC	0	0	0	0	0	0	0	0.380567	0	0
BTSC_BT127_L_AGCTCTCGTGCGATAG	-19.0636	-7.55279	BT127_L	BT127	GSC	0	0	0	0	0	0	0	0	0	0
BTSC_BT127_L_AGCTCTCGTGGTCTCG	2.73309	10.4157	BT127_L	BT127	GSC	0	0	0	0	0	0.0931328	0.15018	0.209078	0.133433	0
BTSC_BT127_L_AGCTCTCTCTAAGCCA	-11.0722	10.8487	BT127_L	BT127	GSC	0	0	0	0	0	0	0.232064	0.240438	0	0
BTSC_BT127_L_AGCTTGAAGATGTAAC	-7.80573	11.4563	BT127_L	BT127	GSC	0	0	0	0	0	0	0	0.359979	0	0
BTSC_BT127_L_AGCTTGAGTTCCCTTG	-11.5327	17.6754	BT127_L	BT127	GSC	0	0	0	0	0	0	0	0	0	0
BTSC_BT127_L_AGGCCACCAGCGAACA	-2.79043	24.5053	BT127_L	BT127	GSC	0	0	0	0	0	0	0	0	0	0
BTSC_BT127_L_AGGCCACGTGGAAAGA	-16.9336	14.9663	BT127_L	BT127	GSC	0	0	0	0	0	0	0	0.345115	0	0
BTSC_BT127_L_AGGCCACTCACCTTAT	-12.2724	10.9721	BT127_L	BT127	GSC	0	0	0	0	0	0	0	0.446265	0	0
BTSC_BT127_L_AGGCCGTCATAGGATA	-12.2513	0.206492	BT127_L	BT127	GSC	0	0	0	0	0	0	0	0	0	0
BTSC_BT127_L_AGGCCGTCATCGATGT	-8.66294	13.6274	BT127_L	BT127	GSC	0	0	0	0	0	0	0	0	0	0
BTSC_BT127_L_AGGGAGTAGTGGTAGC	-10.9033	-3.46285	BT127_L	BT127	GSC	0	0	0	0	0	0.795481	0	0	0	0
BTSC_BT127_L_AGGGATGCAAATCCGT	-9.69861	7.75398	BT127_L	BT127	GSC	0.28409	0	0	0	0	0.282832	0	0	0.405218	0
BTSC_BT127_L_AGGGTGAAGACGACGT	-3.68391	9.25026	BT127_L	BT127	GSC	0	0	0	0	0	0	0	0	0	0.416177
BTSC_BT127_L_AGGGTGAAGGCATGTG	-10.2676	16.3738	BT127_L	BT127	GSC	0	0	0	0	0	0	0.171309	0.590438	0	0.137079
BTSC_BT127_L_AGGGTGACACATAACC	-18.3438	-9.05912	BT127_L	BT127	GSC	0.580956	0	0	0	0	0	0	0	0	0.733877
BTSC_BT127_L_AGGGTGACACCAGTTA	-13.6859	7.42993	BT127_L	BT127	GSC	0	0	0	0	0	0	0.17213	0.545947	0	0.237191
BTSC_BT127_L_AGGTCATCAATGCCAT	-16.1306	7.35437	BT127_L	BT127	GSC	0	0	0	0	0	0.372171	0	0	0	0
BTSC_BT127_L_AGGTCATGTCGCTTTC	-10.0651	13.8479	BT127_L	BT127	GSC	0	0	0.178292	0	0	0.262323	0	0.111057	0	0.252073
BTSC_BT127_L_AGGTCCGAGAAGGACA	-15.1734	0.277089	BT127_L	BT127	GSC	0	0	0	0	0.924053	0	0	0	0	0
BTSC_BT127_L_AGGTCCGAGTTGAGAT	-0.395889	17.6682	BT127_L	BT127	GSC	0	0	0	0	0	0.206596	0	0	0	0
BTSC_BT127_L_AGGTCCGCAAGTTGTC	-7.97461	13.3331	BT127_L	BT127	GSC	0.212745	0	0.324397	0	0.330979	0	0.305342	0.550586	0	0
BTSC_BT127_L_AGGTCCGCACGTCAGC	-16.6038	-10.5547	BT127_L	BT127	GSC	0	0	0	0	0	0	0	0	0	0
BTSC_BT127_L_AGGTCCGGTGTGGCTC	-19.9756	-6.35413	BT127_L	BT127	GSC	0	0	0	0	0	0	0.696142	0	0	0
BTSC_BT127_L_AGGTCCGGTTAAGAAC	-0.00891837	20.2688	BT127_L	BT127	GSC	0	0	0.225065	0	0	0.314907	0	0	0.210535	0.186454
BTSC_BT127_L_AGGTCCGTCAATACCG	-12.1835	-2.38159	BT127_L	BT127	GSC	0	0	0	0	0	0	0	0	0	0
BTSC_BT127_L_AGGTCCGTCAGAGCTT	-4.20074	11.0116	BT127_L	BT127	GSC	0.283844	0	0	0	0	0	0	0	0	0
BTSC_BT127_L_AGGTCCGTCTCGGACG	-10.1354	-0.434999	BT127_L	BT127	GSC	0.114232	0	0	0.193604	0	0	0	0	0.162938	0
BTSC_BT127_L_AGTAGTCAGATTACCC	-11.522	11.2343	BT127_L	BT127	GSC	0	0	0	0	0	0	0	0	0	0
BTSC_BT127_L_AGTCTTTCAAGTACCT	-18.146	-1.92497	BT127_L	BT127	GSC	0	0	0	0	0	0	0	0	0	0
BTSC_BT127_L_AGTCTTTCATGCTAGT	-6.84968	11.6463	BT127_L	BT127	GSC	0	0	0	0	0	0	0	0	0	0.307506
BTSC_BT127_L_AGTCTTTGTCCGTTAA	-17.4794	5.17673	BT127_L	BT127	GSC	0	0	0	0	0	0	0	0	0	0
BTSC_BT127_L_AGTCTTTTCATGTGGT	-3.41008	6.0354	BT127_L	BT127	GSC	0	0	0	0	0	0	0.330427	0	0	0
BTSC_BT127_L_AGTCTTTTCGAGAACG	-6.95547	-9.37709	BT127_L	BT127	GSC	0	0	0	0	0	0	0	0	0	0
BTSC_BT127_L_AGTGAGGAGCTGCAAG	-0.222436	14.6091	BT127_L	BT127	GSC	0.199263	0	0	0	0	0.198381	0.182669	0.299459	0	0
BTSC_BT127_L_AGTGAGGCAATGAAAC	-6.14768	6.54159	BT127_L	BT127	GSC	0	0	0	0.176902	0.374306	0	0.0956851	0.1715	0	0.131852
BTSC_BT127_L_AGTGAGGCAGCTGTAT	-12.776	12.8901	BT127_L	BT127	GSC	0	0	0	0	0	0	0	0	0	0
BTSC_BT127_L_AGTGAGGGTCGAGTTT	-5.77214	1.82313	BT127_L	BT127	GSC	0.173784	0	0	0	0	0	0	0.0949463	0	0
BTSC_BT127_L_AGTGAGGGTTAAGACA	-13.9931	11.4054	BT127_L	BT127	GSC	0	0	0	0	0.256753	0.402684	0	0	0	0.208475
BTSC_BT127_L_AGTGGGATCAAGCCTA	-8.14667	9.02847	BT127_L	BT127	GSC	0.194154	0	0	0	0	0	0	0	0	0
BTSC_BT127_L_AGTGTCAAGAGGGCTT	-19.1498	-3.91275	BT127_L	BT127	GSC	0	0	0	0	0	0	0	0	0	0
BTSC_BT127_L_AGTGTCACAGTCAGAG	-14.1082	6.39453	BT127_L	BT127	GSC	0	0	0	0	0	0	0	0	0	0
BTSC_BT127_L_AGTGTCAGTACTTCTT	-0.375645	14.601	BT127_L	BT127	GSC	0	0	0	0	0	0	0.145115	0	0	0
BTSC_BT127_L_AGTTGGTAGCCGCCTA	-12.4559	13.0336	BT127_L	BT127	GSC	0	0	0	0	0	0	0	0.504335	0	0.473375
BTSC_BT127_L_AGTTGGTAGGCGATAC	-15.7109	-3.77956	BT127_L	BT127	GSC	0	0	0	0	0	0	0	0	0	0
BTSC_BT127_L_AGTTGGTTCCTTTCTC	-4.37718	14.2872	BT127_L	BT127	GSC	0	0	0	0	0	0.150406	0.138494	0	0	0.190842
BTSC_BT127_L_AGTTGGTTCGCGTAGC	-10.5324	4.93161	BT127_L	BT127	GSC	0	0	0	0	0	0.51126	0	0	0	0
BTSC_BT127_L_ATAACGCAGGCTACGA	-1.55067	13.4318	BT127_L	BT127	GSC	0	0	0	0	0	0	0.234823	0.45473	0	0
BTSC_BT127_L_ATAACGCAGTAGTGCG	-10.6793	5.31019	BT127_L	BT127	GSC	0	0	0	0	0	0.582782	0	0	0	0
BTSC_BT127_L_ATAACGCCAAATACAG	-11.3932	2.63885	BT127_L	BT127	GSC	0	0	0	0	0	0	0	0	0	0
BTSC_BT127_L_ATAACGCGTACAAGTA	-3.54791	10.3072	BT127_L	BT127	GSC	0.169832	0	0	0	0	0	0.252495	0.161307	0	0
BTSC_BT127_L_ATAACGCTCTTGAGGT	-3.90994	8.27521	BT127_L	BT127	GSC	0.173233	0	0	0	0	0.172466	0.158807	0	0	0
BTSC_BT127_L_ATAAGAGCACGTCTCT	-12.768	12.7976	BT127_L	BT127	GSC	0	0	0	0	0	0.447116	0	0.343535	0	0
BTSC_BT127_L_ATAAGAGGTCACCTAA	-4.92719	6.53044	BT127_L	BT127	GSC	0.123416	0	0	0	0.192005	0.122869	0	0.311939	0	0.155902
BTSC_BT127_L_ATAAGAGTCTGGTATG	-17.5439	3.18503	BT127_L	BT127	GSC	0	0	0	0	0	0	0.529928	0	0	0
BTSC_BT127_L_ATAGACCAGAAACCGC	-9.87773	6.93569	BT127_L	BT127	GSC	0.131017	0	0	0	0	0	0.120107	0	0	0.27838
BTSC_BT127_L_ATAGACCAGCAAATCA	-11.2389	13.1615	BT127_L	BT127	GSC	0	0	0	0	0	0	0	0	0	0
BTSC_BT127_L_ATAGACCCATTTCAGG	-13.9005	18.5333	BT127_L	BT127	GSC	0	0	0	0	0	0	0.283329	0.347465	0	0.300745
BTSC_BT127_L_ATAGACCGTGAGCGAT	2.41141	18.7404	BT127_L	BT127	GSC	0	0	0	0	0	0	0	0.135932	0.204137	0
BTSC_BT127_L_ATAGACCTCCAAACAC	-13.0343	-1.24915	BT127_L	BT127	GSC	0	0	0	0	0	0	0	0	0	0
BTSC_BT127_L_ATCACGAAGACACTAA	-14.8353	3.11262	BT127_L	BT127	GSC	0	0	0	0	0	0	0	0	0	0
BTSC_BT127_L_ATCACGACACACCGAC	-12.8783	5.21632	BT127_L	BT127	GSC	0	0	0	0	0	0	0	0	0	0
BTSC_BT127_L_ATCACGATCGGAAACG	-1.67428	18.1192	BT127_L	BT127	GSC	0	0	0	0	0	0	0	0.295905	0	0.303425
BTSC_BT127_L_ATCACGATCTACCTGC	-5.38929	15.4573	BT127_L	BT127	GSC	0	0	0	0	0	0.458237	0.288375	0.188751	0	0
BTSC_BT127_L_ATCATCTAGCTATGCT	-17.3604	-9.93166	BT127_L	BT127	GSC	0	0	0	0	0.881327	0	0	0	0	0
BTSC_BT127_L_ATCATGGAGTCTCGGC	-13.3206	5.99742	BT127_L	BT127	GSC	0	0	0	0	0	0	0	0	0	0
BTSC_BT127_L_ATCATGGCATCTCCCA	-11.3482	7.74592	BT127_L	BT127	GSC	0	0	0	0	0	0	0	0.431472	0	0.301293
BTSC_BT127_L_ATCATGGGTGGCAAAC	-12.808	-2.32385	BT127_L	BT127	GSC	0	0	0	0	0	0	0	0	0	0
BTSC_BT127_L_ATCATGGTCAGCGATT	-6.10591	6.96002	BT127_L	BT127	GSC	0	0	0	0	0	0	0.37672	0	0	0
BTSC_BT127_L_ATCATGGTCCCTCAGT	-12.9315	8.55255	BT127_L	BT127	GSC	0	0	0.557554	0	0	0	0	0	0	0
BTSC_BT127_L_ATCATGGTCGTCCAGG	-8.48726	6.62855	BT127_L	BT127	GSC	0	0	0	0	0	0	0	0	0	0
BTSC_BT127_L_ATCCACCAGAGTAATC	-14.9741	-5.02233	BT127_L	BT127	GSC	0	0	0	0	0	0	0	0	0	0
BTSC_BT127_L_ATCCACCAGCGTCTAT	-17.1002	3.29453	BT127_L	BT127	GSC	0	0	0.472307	0	0.481891	0	0	0	0	0
BTSC_BT127_L_ATCCACCAGGAGTTGC	6.64817	12.7882	BT127_L	BT127	GSC	0	0	0	0	0	0	0	0.201003	0.178381	0
BTSC_BT127_L_ATCCACCGTCCCTACT	-12.823	7.16718	BT127_L	BT127	GSC	0.20974	0	0	0	0.326303	0	0	0.503674	0	0.264948
BTSC_BT127_L_ATCCACCGTTCCGGCA	-15.3903	8.53126	BT127_L	BT127	GSC	0	0	0	0	0	0	0	0	0	0.436564
BTSC_BT127_L_ATCCACCTCAATCTCT	-15.5651	7.27645	BT127_L	BT127	GSC	0	0	0	0	0	0	0	0	0	0
BTSC_BT127_L_ATCCGAAGTAAGTGGC	-7.18172	10.0588	BT127_L	BT127	GSC	0	0	0	0	0	0	0.185735	0	0	0.255938
BTSC_BT127_L_ATCCGAAGTAGGGACT	-11.697	10.4243	BT127_L	BT127	GSC	0	0	0	0	0	0.119998	0.110494	0.417715	0	0.152259
BTSC_BT127_L_ATCCGAAGTCATCCCT	-14.9183	-3.56079	BT127_L	BT127	GSC	0	0	0	0	0	0.507447	0	0	0	0
BTSC_BT127_L_ATCCGAAGTCTAGCCG	-5.65096	7.30241	BT127_L	BT127	GSC	0	0	0	0	0	0	0	0.138133	0	0
BTSC_BT127_L_ATCCGAAGTGTGACCC	-10.3362	7.79957	BT127_L	BT127	GSC	0	0	0.246847	0	0	0	0	0	0	0
BTSC_BT127_L_ATCGAGTCAATACGCT	-6.20933	2.25255	BT127_L	BT127	GSC	0	0	0.869538	0	0	0	0	0	0	0
BTSC_BT127_L_ATCGAGTGTAAGTGGC	-15.3204	7.37878	BT127_L	BT127	GSC	0	0	0	0	0.812765	0	0	0	0	0
BTSC_BT127_L_ATCGAGTGTACGCACC	-4.19895	8.80436	BT127_L	BT127	GSC	0	0	0	0	0	0	0.285152	0	0.279695	0.496067
BTSC_BT127_L_ATCGAGTGTAGGACAC	-8.56884	12.7279	BT127_L	BT127	GSC	0.0753965	0	0.114966	0	0	0.372893	0.0691177	0.0716117	0.107544	0.170454
BTSC_BT127_L_ATCTACTAGAAACGCC	-13.1774	9.07859	BT127_L	BT127	GSC	0	0	0	0	0.28453	0	0.268868	0.568988	0	0
BTSC_BT127_L_ATCTACTAGACCCACC	-17.6736	3.2534	BT127_L	BT127	GSC	0	0	0	0	0	0	0	0	0	0
BTSC_BT127_L_ATCTACTCATTTCAGG	-11.1258	13.9246	BT127_L	BT127	GSC	0	0	0	0	0	0	0	0	0	0.436145
BTSC_BT127_L_ATCTACTTCCACTGGG	-18.3	-3.43645	BT127_L	BT127	GSC	0	0	0	0	0	0	0	0	0	0
BTSC_BT127_L_ATCTGCCCACCACCAG	-11.3717	12.0402	BT127_L	BT127	GSC	0	0	0.425352	0	0	0	0.255723	0	0	0
BTSC_BT127_L_ATCTGCCCAGCTGCTG	-6.70871	7.09334	BT127_L	BT127	GSC	0	0	0	0	0	0	0	0	0	0.196985
BTSC_BT127_L_ATCTGCCCATGCAATC	1.28485	15.8922	BT127_L	BT127	GSC	0	0	0.1785	0	0	0.358429	0	0.566052	0	0
BTSC_BT127_L_ATCTGCCGTCTTCTCG	-17.4259	18.4234	BT127_L	BT127	GSC	0	0	0	0	0.477592	0	0	0	0.437874	0
BTSC_BT127_L_ATCTGCCGTTCCGTCT	-13.2478	2.72809	BT127_L	BT127	GSC	0	0	0	0	0	0	0.0911735	0.0944633	0	0
BTSC_BT127_L_ATGAGGGAGGATTCGG	-5.17122	15.7163	BT127_L	BT127	GSC	0	0	0	0	0	0	0	0	0	0
BTSC_BT127_L_ATGAGGGCATGTAAGA	-9.01555	13.4003	BT127_L	BT127	GSC	0.143907	0	0.219432	0	0	0.308783	0.336455	0	0	0
BTSC_BT127_L_ATGAGGGTCCTCATTA	-10.7263	8.99229	BT127_L	BT127	GSC	0	0	0	0	0	0	0	0	0	0.583332
BTSC_BT127_L_ATGCGATAGGATGTAT	-2.7311	11.4817	BT127_L	BT127	GSC	0	0	0	0	0	0.17092	0	0	0	0
BTSC_BT127_L_ATGCGATCACAGCCCA	3.79667	11.2406	BT127_L	BT127	GSC	0	0	0	0	0	0.143262	0	0	0	0.181778
BTSC_BT127_L_ATGCGATTCACCTCGT	-2.66802	17.5116	BT127_L	BT127	GSC	0.133376	0	0	0	0	0.22282	0	0.126681	0	0.282724
BTSC_BT127_L_ATGGGAGCAGGGAGAG	-12.932	-11.389	BT127_L	BT127	GSC	0	0	0	0	0	0	0	0	0	0
BTSC_BT127_L_ATGTGTGAGACACGAC	-2.46757	18.7968	BT127_L	BT127	GSC	0.185947	0	0	0	0	0.437667	0.272665	0	0	0
BTSC_BT127_L_ATGTGTGCAACACCCG	2.12742	19.5546	BT127_L	BT127	GSC	0.211717	0	0.190785	0	0	0.330263	0	0.11884	0	0.158055
BTSC_BT127_L_ATGTGTGCAGTTCCCT	-14.5223	6.60144	BT127_L	BT127	GSC	0	0	0	0	0	0	0	0	0	0
BTSC_BT127_L_ATTACTCAGCCTATGT	-4.13163	13.5309	BT127_L	BT127	GSC	0.202878	0	0	0	0.315629	0	0	0	0	0.256281
BTSC_BT127_L_ATTACTCGTTGCGCAC	-14.4308	-0.4652	BT127_L	BT127	GSC	0	0	0	0	0	0	0	0	0	0
BTSC_BT127_L_ATTACTCTCCAGAGGA	2.16169	15.1086	BT127_L	BT127	GSC	0	0	0	0	0	0.166601	0	0.330837	0.238692	0
BTSC_BT127_L_ATTATCCAGCCCAATT	-1.85494	10.9704	BT127_L	BT127	GSC	0	0	0	0	0	0	0	0	0	0
BTSC_BT127_L_ATTATCCCAGCATGAG	-13.1553	-5.90856	BT127_L	BT127	GSC	0	0	0	0	0	0	0	0	0	0
BTSC_BT127_L_ATTATCCGTAGGCTGA	-6.86385	8.85929	BT127_L	BT127	GSC	0.165747	0	0	0	0	0	0.151944	0.157426	0	0.209375
BTSC_BT127_L_ATTATCCGTCCCGACA	-6.13036	10.4664	BT127_L	BT127	GSC	0	0	0	0	0	0.127316	0.117233	0.121463	0	0
BTSC_BT127_L_ATTATCCTCTCGGACG	3.51688	18.6236	BT127_L	BT127	GSC	0	0	0	0	0	0	0	0	0	0
BTSC_BT127_L_ATTCTACTCAAGGCTT	-19.7911	14.918	BT127_L	BT127	GSC	0	0	0	0	0	0	0	0	0	0
BTSC_BT127_L_ATTCTACTCGCCATAA	-5.04354	16.5374	BT127_L	BT127	GSC	0	0	0	0	0	0.333927	0	0	0	0
BTSC_BT127_L_ATTCTACTCGTCTGCT	-5.68209	9.82698	BT127_L	BT127	GSC	0.287282	0	0.19891	0	0	0	0.119585	0	0	0
BTSC_BT127_L_ATTGGACCAGGACCCT	2.06714	12.7216	BT127_L	BT127	GSC	0.166425	0	0	0	0	0	0.152566	0	0	0.210232
BTSC_BT127_L_ATTGGACCATATACGC	-9.17169	5.36793	BT127_L	BT127	GSC	0.155789	0	0.23755	0	0	0.155099	0	0	0	0.196797
BTSC_BT127_L_ATTGGACTCGTCCAGG	-23.0661	4.19488	BT127_L	BT127	GSC	0	0	0	0	0	0	0	0.406269	0	0
BTSC_BT127_L_ATTGGTGAGGCGACAT	-6.72385	17.4514	BT127_L	BT127	GSC	0	0	0	0	0	0	0.263262	0	0	0
BTSC_BT127_L_ATTTCTGAGCACGCCT	-15.3613	3.87852	BT127_L	BT127	GSC	0	0	0	0	0	0	0.526723	0.545728	0	0
BTSC_BT127_L_ATTTCTGGTCACAAGG	-12.1369	-2.82494	BT127_L	BT127	GSC	0	0	0	0	0	0	0.490975	0	0	0
BTSC_BT127_L_ATTTCTGTCAAGGTAA	-15.9219	4.90782	BT127_L	BT127	GSC	0	0	0	0	0	0	0	0	0	0.615151
BTSC_BT127_L_CAACCAAAGACGACGT	-7.26627	15.4746	BT127_L	BT127	GSC	0.205867	0	0	0	0	0.204955	0.188723	0	0	0.260057
BTSC_BT127_L_CAACCAACACGTTGGC	-0.798931	8.32609	BT127_L	BT127	GSC	0	0	0	0	0	0.402267	0	0	0	0
BTSC_BT127_L_CAACCTCAGCGCTTAT	-17.0641	-1.95899	BT127_L	BT127	GSC	0	0	0.113776	0	0	0	0	0.0708709	0.106431	0.0942575
BTSC_BT127_L_CAACCTCGTGCGGTAA	-19.3833	-10.3016	BT127_L	BT127	GSC	0	0	0	0	0	0	0	0	0	0
BTSC_BT127_L_CAACTAGCAATGGAAT	-20.893	-11.4584	BT127_L	BT127	GSC	0	0	0	0	0	0	0	0	0	0
BTSC_BT127_L_CAACTAGGTACGAAAT	-3.86587	8.3681	BT127_L	BT127	GSC	0	0	0	0	0	0	0.371509	0	0	0
BTSC_BT127_L_CAAGAAAAGCTCTCGG	-9.04801	7.80251	BT127_L	BT127	GSC	0.191478	0	0	0	0	0.303534	0	0.241057	0.159123	0
BTSC_BT127_L_CAAGAAACAATCGGTT	1.49404	19.3824	BT127_L	BT127	GSC	0	0	0	0	0	0	0.258767	0.121159	0	0
BTSC_BT127_L_CAAGAAAGTAGTACCT	-13.2335	9.59427	BT127_L	BT127	GSC	0	0	0	0	0	0.401639	0	0	0	0
BTSC_BT127_L_CAAGATCCAATAACGA	-5.58572	19.3115	BT127_L	BT127	GSC	0	0	0	0	0	0	0	0.268722	0	0.357397
BTSC_BT127_L_CAAGATCGTGATGCCC	-5.31473	10.558	BT127_L	BT127	GSC	0.307404	0	0	0	0	0	0	0	0	0.244255
BTSC_BT127_L_CAAGATCTCTAGAGTC	-11.5202	2.79877	BT127_L	BT127	GSC	0	0	0	0	0	0	0	0	0	0
BTSC_BT127_L_CAAGGCCCAACAACCT	-7.43477	19.3548	BT127_L	BT127	GSC	0	0	0	0	0	0.625823	0	0.553663	0	0
BTSC_BT127_L_CAAGGCCCAGGTCGTC	-14.1278	9.65768	BT127_L	BT127	GSC	0.13103	0	0	0	0	0	0.120118	0	0.314359	0
BTSC_BT127_L_CAAGGCCGTATCAGTC	-10.7856	-0.234197	BT127_L	BT127	GSC	0.138259	0	0	0	0	0	0	0	0	0.174652
BTSC_BT127_L_CAAGGCCGTCGACTGC	-2.65965	7.95441	BT127_L	BT127	GSC	0.16358	0	0	0	0	0	0.149958	0	0	0
BTSC_BT127_L_CAAGGCCGTCGGATCC	-8.70445	11.6	BT127_L	BT127	GSC	0	0	0	0	0	0.118555	0.18588	0.113105	0	0.150428
BTSC_BT127_L_CAAGGCCTCTACCAGA	-13.2496	5.402	BT127_L	BT127	GSC	0	0	0	0	0	0	0	0	0	0
BTSC_BT127_L_CAAGTTGAGTCTCGGC	-10.8913	15.6495	BT127_L	BT127	GSC	0	0	0	0	0	0.335503	0.308932	0.400568	0	0
BTSC_BT127_L_CACAAACAGAGTGAGA	-16.4277	11.6932	BT127_L	BT127	GSC	0	0	0	0	0	0	0	0.357993	0	0.673934
BTSC_BT127_L_CACAAACAGGCGATAC	-17.937	12.5788	BT127_L	BT127	GSC	0	0	0	0	0	0.617058	0.282933	0.4304	0	0
BTSC_BT127_L_CACAAACGTAGCGCTC	-0.918971	12.0731	BT127_L	BT127	GSC	0	0	0	0	0	0.162232	0	0.324189	0	0
BTSC_BT127_L_CACAAACGTAGCTCCG	-7.51604	8.19395	BT127_L	BT127	GSC	0	0	0	0	0	0.674029	0	0.545728	0	0
BTSC_BT127_L_CACAAACTCAGGCGAA	-13.6098	-1.38249	BT127_L	BT127	GSC	0	0	0	0	0	0	0	0	0	0
BTSC_BT127_L_CACAAACTCGTCTGAA	-0.584508	14.9681	BT127_L	BT127	GSC	0	0	0	0	0	0.136698	0	0.130414	0	0.448258
BTSC_BT127_L_CACACAAAGATAGTCA	-8.50189	8.95713	BT127_L	BT127	GSC	0	0	0	0	0	0	0	0	0	0
BTSC_BT127_L_CACACAAAGGAGCGTT	1.7158	19.7197	BT127_L	BT127	GSC	0	0	0	0	0	0	0.279907	0.182185	0	0
BTSC_BT127_L_CACACAAAGGTGCACA	-9.04465	13.055	BT127_L	BT127	GSC	0	0	0.231003	0	0	0	0	0.143891	0.216089	0
BTSC_BT127_L_CACACCTAGGCTCATT	-15.3182	7.4364	BT127_L	BT127	GSC	0	0	0	0	0	0.236635	0	0	0	0
BTSC_BT127_L_CACACCTCAAGTCTAC	-7.0143	11.9737	BT127_L	BT127	GSC	0	0	0	0	0	0	0.223137	0	0	0
BTSC_BT127_L_CACACCTGTAATCACC	-3.50859	12.9432	BT127_L	BT127	GSC	0	0	0	0	0	0.227566	0	0	0	0
BTSC_BT127_L_CACACCTGTAGGGACT	-0.376884	9.92111	BT127_L	BT127	GSC	0.283506	0	0	0	0	0.28225	0	0.269274	0	0
BTSC_BT127_L_CACACCTGTTTGCATG	-14.0902	12.8021	BT127_L	BT127	GSC	0	0	0	0	0	0	0.266812	0	0	0
BTSC_BT127_L_CACACCTTCAGAGGTG	-12.9046	13.9508	BT127_L	BT127	GSC	0	0	0	0	0	0.314894	0	0.300417	0	0
BTSC_BT127_L_CACACCTTCGATAGAA	-3.82682	21.9234	BT127_L	BT127	GSC	0	0	0	0	0	0.163961	0	0	0	0.208041
BTSC_BT127_L_CACACTCCATCGATTG	-10.9841	12.3518	BT127_L	BT127	GSC	0	0	0	0	0	0	0.217952	0	0	0
BTSC_BT127_L_CACACTCGTAGCGTGA	-14.8125	8.28444	BT127_L	BT127	GSC	0	0	0	0	0	0	0	0	0	0
BTSC_BT127_L_CACAGGCAGACTTTCG	-16.8752	-11.0911	BT127_L	BT127	GSC	0	0	0	0	0	0	0	0	0	0
BTSC_BT127_L_CACAGGCAGATGGGTC	-11.2759	6.1843	BT127_L	BT127	GSC	0	0	0	0	0	0	0	0	0	0
BTSC_BT127_L_CACAGGCCACTAGTAC	-11.7748	12.6006	BT127_L	BT127	GSC	0.253447	0	0.234925	0	0	0.153385	0.141238	0	0	0.194622
BTSC_BT127_L_CACAGGCGTCGCTTCT	-7.20803	10.5452	BT127_L	BT127	GSC	0	0	0	0	0	0	0	0	0.386943	0.514837
BTSC_BT127_L_CACAGGCTCATCTGTT	-8.7493	14.0734	BT127_L	BT127	GSC	0	0	0	0	0	0	0.268717	0	0.41811	0.230875
BTSC_BT127_L_CACAGGCTCTTGCCGT	-8.42696	9.93725	BT127_L	BT127	GSC	0	0	0	0	0	0.152262	0	0.145262	0	0
BTSC_BT127_L_CACAGTAAGATCCCAT	-7.75451	7.95819	BT127_L	BT127	GSC	0	0	0	0	0	0.319025	0.293759	0	0	0
BTSC_BT127_L_CACAGTAAGTGGTAGC	-18.8715	8.60942	BT127_L	BT127	GSC	0	0	0	0	0	0	0.426898	0	0	0
BTSC_BT127_L_CACAGTACACAGCGTC	-14.7209	3.12499	BT127_L	BT127	GSC	0	0	0	0	0	0	0	0	0	0
BTSC_BT127_L_CACAGTAGTAGCTTGT	-5.18225	11.3038	BT127_L	BT127	GSC	0	0	0	0	0.478902	0	0	0	0	0.244652
BTSC_BT127_L_CACAGTATCCAGAGGA	-18.146	-9.10447	BT127_L	BT127	GSC	0	0	0	0	0	0	0	0	0	0
BTSC_BT127_L_CACATAGTCTGGCGAC	-12.7439	0.981815	BT127_L	BT127	GSC	0	0	0	0	0	0	0	0	0	0
BTSC_BT127_L_CACATTTAGCGTAATA	-22.171	-7.38358	BT127_L	BT127	GSC	0	0	0	0	0	0	0	0	0	0
BTSC_BT127_L_CACATTTCATGTTGAC	-5.77488	11.8381	BT127_L	BT127	GSC	0	0	0	0	0	0	0.395888	0	0	0
BTSC_BT127_L_CACATTTGTCTTCAAG	-13.1968	12.118	BT127_L	BT127	GSC	0	0	0	0	0	0	0	0	0	0.529123
BTSC_BT127_L_CACATTTGTTCCGTCT	-10.5708	13.8735	BT127_L	BT127	GSC	0.207389	0	0	0	0.322646	0.20647	0.434496	0.196978	0	0.261978
BTSC_BT127_L_CACCACTAGCGTCAAG	-9.07111	5.3916	BT127_L	BT127	GSC	0.161321	0	0	0	0.250975	0	0	0	0	0
BTSC_BT127_L_CACCACTAGGCTAGAC	2.6532	10.4855	BT127_L	BT127	GSC	0.472074	0	0	0	0	0.17445	0.160634	0	0	0
BTSC_BT127_L_CACCACTGTCCGTTAA	-7.16773	7.10572	BT127_L	BT127	GSC	0.225918	0	0	0	0	0	0.321051	0	0	0.285385
BTSC_BT127_L_CACCAGGAGCGTTCCG	-2.87168	23.5582	BT127_L	BT127	GSC	0	0	0	0	0	0.345439	0.318081	0	0	0
BTSC_BT127_L_CACCAGGGTCGGGTCT	-14.1407	4.85615	BT127_L	BT127	GSC	0	0	0	0	0.165758	0.106073	0.097672	0.355357	0.151973	0.13459
BTSC_BT127_L_CACCTTGCAGGGCATA	-12.1109	0.553336	BT127_L	BT127	GSC	0	0	0	0	0	0	0	0	0	0.71561
BTSC_BT127_L_CACCTTGGTCGTCTTC	-7.91386	3.59592	BT127_L	BT127	GSC	0	0	0	0	0	0	0	0.820534	0	0
BTSC_BT127_L_CACCTTGGTGATGATA	-8.6422	15.7743	BT127_L	BT127	GSC	0	0	0	0	0	0.285466	0.16324	0.272342	0	0
BTSC_BT127_L_CACTCCAAGGGATCTG	-14.9616	-9.74762	BT127_L	BT127	GSC	0	0	0	0	0	0	0	0	0	0
BTSC_BT127_L_CACTCCAAGTACACCT	-9.06773	8.92805	BT127_L	BT127	GSC	0	0	0	0	0.574674	0	0	0	0	0.466617
BTSC_BT127_L_CACTCCACATACGCCG	-8.24577	9.30557	BT127_L	BT127	GSC	0.276169	0	0	0	0	0.169612	0.156179	0	0	0
BTSC_BT127_L_CACTCCACATCACAAC	-7.16007	6.29393	BT127_L	BT127	GSC	0	0	0	0	0	0	0	0.134371	0	0.297514
BTSC_BT127_L_CACTCCAGTCCTCTTG	-6.47711	15.564	BT127_L	BT127	GSC	0	0	0.288821	0	0	0	0.17364	0.580355	0	0
BTSC_BT127_L_CACTCCAGTGGCCCTA	-17.6353	2.82243	BT127_L	BT127	GSC	0	0	0	0	0	0	0	0	0	0
BTSC_BT127_L_CAGAATCAGGTAGCCA	-16.2333	7.94392	BT127_L	BT127	GSC	0	0	0	0	0	0	0	0	0	0
BTSC_BT127_L_CAGAATCCACATGGGA	-17.1231	19.3833	BT127_L	BT127	GSC	0	0	0	0	0	0.263529	0.242658	0	0	0.50452
BTSC_BT127_L_CAGAATCCATCCCATC	-12.6465	11.2983	BT127_L	BT127	GSC	0	0	0	0	0	0	0	0	0	0.428986
BTSC_BT127_L_CAGAATCTCGCATGAT	-3.16536	12.8555	BT127_L	BT127	GSC	0	0	0.249754	0	0	0.163068	0	0.325465	0	0.206908
BTSC_BT127_L_CAGAGAGAGCTAGCCC	-7.71893	13.0406	BT127_L	BT127	GSC	0	0	0	0	0	0.257615	0.104779	0.432426	0	0
BTSC_BT127_L_CAGAGAGAGGGTATCG	-9.12456	9.93891	BT127_L	BT127	GSC	0	0	0	0	0	0	0	0.23121	0	0
BTSC_BT127_L_CAGAGAGCAACACGCC	4.66798	15.3714	BT127_L	BT127	GSC	0.100339	0	0	0.170057	0	0.23201	0.0919827	0.165609	0	0.12675
BTSC_BT127_L_CAGAGAGGTCCGACGT	-9.54592	17.917	BT127_L	BT127	GSC	0	0	0	0	0.149288	0.0955336	0.153625	0.213464	0	0.211692
BTSC_BT127_L_CAGATCACACAACGCC	-17.6319	-3.78176	BT127_L	BT127	GSC	0.442026	0	0	0	0.687684	0	0	0	0	0
BTSC_BT127_L_CAGATCACAGTGACAG	-9.82056	20.4439	BT127_L	BT127	GSC	0	0	0	0	0.766374	0	0	0.324643	0.702639	0
BTSC_BT127_L_CAGATCAGTTACGCGC	-14.148	0.345308	BT127_L	BT127	GSC	0	0	0	0	0	0	0	0	0	0
BTSC_BT127_L_CAGCAGCAGATAGTCA	-17.2345	-8.05328	BT127_L	BT127	GSC	0	0	0	0	0	0	0	0	0	0
BTSC_BT127_L_CAGCAGCGTTCCCTTG	-11.5576	3.96604	BT127_L	BT127	GSC	0.217881	0	0	0	0	0	0.118545	0	0	0
BTSC_BT127_L_CAGCATAAGCGTTTAC	-21.6704	-0.293414	BT127_L	BT127	GSC	0	0	0	0	0	0	0	0	0	0
BTSC_BT127_L_CAGCATAGTAAGTAGT	2.03598	15.3164	BT127_L	BT127	GSC	0.123432	0	0	0	0	0	0.301105	0.19872	0	0
BTSC_BT127_L_CAGCCGAAGGCCATAG	-8.74648	13.7092	BT127_L	BT127	GSC	0.161631	0	0	0	0	0.262886	0	0	0	0.204177
BTSC_BT127_L_CAGCCGACACCAGTTA	1.21484	15.3143	BT127_L	BT127	GSC	0	0	0	0	0	0	0.210858	0.33765	0	0.173885
BTSC_BT127_L_CAGCCGATCAGTTGAC	-11.1925	9.78249	BT127_L	BT127	GSC	0	0	0	0	0	0	0	0.316651	0	0
BTSC_BT127_L_CAGCGACAGAAACCAT	-11.3759	7.01688	BT127_L	BT127	GSC	0	0	0	0	0	0	0	0	0	0
BTSC_BT127_L_CAGCGACAGGGTTCCC	-6.45424	14.3007	BT127_L	BT127	GSC	0.137733	0	0	0	0	0.29843	0	0.337794	0	0
BTSC_BT127_L_CAGCGACCAATTGCTG	-10.9391	17.6986	BT127_L	BT127	GSC	0	0	0	0	0	0.183705	0	0.356303	0	0.373292
BTSC_BT127_L_CAGCTAACACTCTGTC	-6.06401	14.8256	BT127_L	BT127	GSC	0.192042	0	0	0	0	0	0.17605	0	0	0
BTSC_BT127_L_CAGCTAAGTACAAGTA	-10.4986	10.2345	BT127_L	BT127	GSC	0	0	0	0	0	0	0	0	0	0
BTSC_BT127_L_CAGCTGGAGACACTAA	-9.44495	10.6722	BT127_L	BT127	GSC	0	0	0	0	0	0	0	0	0	0.321031
BTSC_BT127_L_CAGCTGGAGCACACAG	-14.2323	3.39532	BT127_L	BT127	GSC	0.432009	0	0	0	0	0.430096	0	0	0	0
BTSC_BT127_L_CAGCTGGAGTAGTGCG	-10.8199	6.78808	BT127_L	BT127	GSC	0	0	0	0	0	0	0	0	0	0
BTSC_BT127_L_CAGCTGGTCCAATGGT	-12.7645	-2.71198	BT127_L	BT127	GSC	0	0	0	0	0	0	0	0	0	0
BTSC_BT127_L_CAGGTGCTCTGTGCAA	-11.049	-2.15708	BT127_L	BT127	GSC	0	0	0	0	0	0	0	0	0	0
BTSC_BT127_L_CAGTAACAGCGAAGGG	-11.2516	3.43014	BT127_L	BT127	GSC	0	0	0	0	0	0	0	0	0	0.528009
BTSC_BT127_L_CAGTAACAGTTAGCGG	-8.20711	14.5837	BT127_L	BT127	GSC	0	0	0	0	0	0.237518	0	0.431557	0	0.301374
BTSC_BT127_L_CAGTAACCAAGCCTAT	-3.74931	10.2674	BT127_L	BT127	GSC	0	0	0	0	0	0	0	0	0	0
BTSC_BT127_L_CAGTAACCAAGTAATG	-7.0988	21.8251	BT127_L	BT127	GSC	0	0	0	0	0	0.17057	0	0.441825	0	0.216427
BTSC_BT127_L_CAGTAACCAATCCAAC	-20.924	-12.8324	BT127_L	BT127	GSC	0	0	0	0	0	0	0	0	0	0
BTSC_BT127_L_CAGTAACGTAGCGTGA	-11.6792	5.72754	BT127_L	BT127	GSC	0	0	0	0	0	0.165598	0	0	0	0.210118
BTSC_BT127_L_CAGTAACTCAGTCCCT	-0.426776	11.3782	BT127_L	BT127	GSC	0	0	0	0	0	0.205655	0	0	0	0
BTSC_BT127_L_CAGTAACTCCACTCCA	2.92562	13.3569	BT127_L	BT127	GSC	0.131505	0	0	0	0	0	0.120553	0	0	0.16612
BTSC_BT127_L_CAGTAACTCGAATGGG	-15.5348	5.75948	BT127_L	BT127	GSC	0	0	0	0	0	0	0.405523	0	0	0
BTSC_BT127_L_CAGTCCTTCTGCCAGG	-14.0199	-12.7082	BT127_L	BT127	GSC	0.520166	0	0	0	0	0	0	0	0	0
BTSC_BT127_L_CATATGGTCAGCAACT	-16.8345	3.80474	BT127_L	BT127	GSC	0	0	0	0	0	0	0	0	0	0
BTSC_BT127_L_CATATTCAGTATCGAA	-14.5221	4.0508	BT127_L	BT127	GSC	0.332123	0	0	0	0	0	0	0	0	0.419545
BTSC_BT127_L_CATATTCTCCGCGCAA	-15.4181	-6.75101	BT127_L	BT127	GSC	0	0	0	0	0	0	0	0	0	0
BTSC_BT127_L_CATCAAGAGCCACGTC	-12.8307	13.1787	BT127_L	BT127	GSC	0	0	0	0	0	0.21904	0	0.20897	0	0
BTSC_BT127_L_CATCAAGCAAGTCATC	-5.17359	7.49882	BT127_L	BT127	GSC	0	0	0	0	0	0.108918	0.100292	0	0	0
BTSC_BT127_L_CATCAAGGTACCGCTG	-16.5893	-2.23725	BT127_L	BT127	GSC	0	0	0	0	0	0	0	0	0	0.749413
BTSC_BT127_L_CATCAGACAGGACCCT	-14.9179	4.85881	BT127_L	BT127	GSC	0.344791	0	0.525742	0	0	0	0	0	0	0
BTSC_BT127_L_CATCAGATCATCTGCC	-12.0998	5.13018	BT127_L	BT127	GSC	0	0	0	0	0	0	0	0	0.363848	0
BTSC_BT127_L_CATCCACAGTACGCGA	-12.0783	8.04535	BT127_L	BT127	GSC	0	0	0	0	0	0	0	0	0	0
BTSC_BT127_L_CATCCACCAATAGAGT	-14.5007	6.38971	BT127_L	BT127	GSC	0	0	0	0	0	0	0	0	0	0
BTSC_BT127_L_CATCCACCATTAACCG	-18.8494	1.37848	BT127_L	BT127	GSC	0	0	0	0	0	0	0	0	0	0.351634
BTSC_BT127_L_CATCGAACATCGACGC	-6.40424	17.1523	BT127_L	BT127	GSC	0	0	0.393374	0	0	0	0.236498	0.245031	0	0
BTSC_BT127_L_CATCGAATCACGCATA	-8.28919	11.7419	BT127_L	BT127	GSC	0.19557	0	0	0	0	0	0	0	0	0
BTSC_BT127_L_CATCGAATCCGTCAAA	-12.9664	7.49876	BT127_L	BT127	GSC	0	0	0	0	0	0.438368	0	0.283054	0	0
BTSC_BT127_L_CATCGAATCTTGACGA	-10.7299	10.1133	BT127_L	BT127	GSC	0	0	0	0	0	0	0.191314	0	0	0.263626
BTSC_BT127_L_CATCGGGAGTACGATA	-19.1658	-5.17852	BT127_L	BT127	GSC	0	0	0	0	0	0	0	0	0	0
BTSC_BT127_L_CATCGGGTCACATGCA	-10.2345	5.02625	BT127_L	BT127	GSC	0	0	0	0	0.201676	0	0	0.123125	0	0.163754
BTSC_BT127_L_CATCGGGTCATTGCGA	-9.71758	4.30574	BT127_L	BT127	GSC	0	0	0	0	0	0.46864	0	0	0	0
BTSC_BT127_L_CATGACATCTCAAACG	-18.3382	14.938	BT127_L	BT127	GSC	0	0	0	0	0	0.281246	0	0.400237	0	0
BTSC_BT127_L_CATGGCGAGAATCTCC	-10.6033	12.096	BT127_L	BT127	GSC	0	0	0	0	0	0.141047	0.129876	0	0	0.178967
BTSC_BT127_L_CATGGCGAGACCCACC	-2.53274	13.3391	BT127_L	BT127	GSC	0.286877	0	0	0	0	0	0	0	0	0
BTSC_BT127_L_CATGGCGAGGAGTTTA	-14.9538	8.58562	BT127_L	BT127	GSC	0	0	0	0	0	0	0	0	0	0
BTSC_BT127_L_CATTATCCATAGTAAG	5.71046	13.6289	BT127_L	BT127	GSC	0	0	0	0	0.286628	0.183421	0	0.174989	0	0
BTSC_BT127_L_CATTCGCAGCAACGGT	-15.1337	9.61698	BT127_L	BT127	GSC	0	0	0	0	0	0	0	0	0	0
BTSC_BT127_L_CATTCGCAGCTGATAA	-14.0677	14.5549	BT127_L	BT127	GSC	0	0	0	0	0	0.383248	0	0	0	0.486282
BTSC_BT127_L_CATTCGCCAGGCTCAC	-18.1065	-3.72073	BT127_L	BT127	GSC	0.0549288	0	0	0	0	0.1005	0.128841	0.0521714	0	0.0693874
BTSC_BT127_L_CATTCGCGTCCTGCTT	-13.4358	9.41445	BT127_L	BT127	GSC	0	0	0	0	0	0.400835	0	0.631482	0	0.508597
BTSC_BT127_L_CATTCGCGTGCGAAAC	-8.75407	12.4225	BT127_L	BT127	GSC	0	0	0	0	0	0.304701	0.176334	0.367636	0	0
BTSC_BT127_L_CCAATCCAGCAGACTG	-17.3973	-0.760434	BT127_L	BT127	GSC	0	0	0	0	0	0	0	0	0	0
BTSC_BT127_L_CCAATCCGTCGCGGTT	-12.6086	8.77818	BT127_L	BT127	GSC	0	0	0	0	0	0	0	0	0	0
BTSC_BT127_L_CCAATCCGTTAAGATG	-12.4611	11.2802	BT127_L	BT127	GSC	0	0	0	0	0	0	0	0	0	0.389271
BTSC_BT127_L_CCAATCCGTTCCTCCA	-14.9389	-4.83844	BT127_L	BT127	GSC	0	0	0	0	0	0	0	0	0	0
BTSC_BT127_L_CCAATCCTCAACGCTA	-7.39394	12.5052	BT127_L	BT127	GSC	0	0	0	0	0	0	0.230097	0.2384	0.358019	0
BTSC_BT127_L_CCACCTAAGAATGTTG	-9.32714	9.84816	BT127_L	BT127	GSC	0.0870989	0	0	0	0	0	0.0798456	0.277318	0	0.36883
BTSC_BT127_L_CCACCTAAGGCTCATT	-2.02692	9.10057	BT127_L	BT127	GSC	0.330311	0	0	0	0	0	0.439141	0	0	0.417257
BTSC_BT127_L_CCACCTAAGTTCCACA	-19.6838	2.1187	BT127_L	BT127	GSC	0	0	0.453013	0	0	0	0	0.28218	0	0
BTSC_BT127_L_CCACCTAGTTAAGACA	-14.2287	10.0824	BT127_L	BT127	GSC	0	0	0	0	0	0.33946	0	0	0	0
BTSC_BT127_L_CCACCTATCAACGGCC	-18.8998	-2.24729	BT127_L	BT127	GSC	0	0	0	0	0	0	0	0	0	0
BTSC_BT127_L_CCACCTATCATACGGT	-7.83734	10.0696	BT127_L	BT127	GSC	0	0	0.219773	0	0	0	0	0.136896	0	0
BTSC_BT127_L_CCACGGAAGTACGTTC	-15.2887	3.72169	BT127_L	BT127	GSC	0.0945292	0	0	0	0.147064	0	0	0	0	0.119412
BTSC_BT127_L_CCACGGATCTGATTCT	-9.49174	5.54735	BT127_L	BT127	GSC	0.403922	0	0.182439	0	0	0.267157	0	0.113641	0.170661	0.2572
BTSC_BT127_L_CCACTACAGAAGGGTA	-14.3816	-5.16322	BT127_L	BT127	GSC	0	0	0	0	0	0	0	0	0	0
BTSC_BT127_L_CCACTACAGCCACGTC	-22.2736	0.430644	BT127_L	BT127	GSC	0	0	0	0	0	0.451141	0	0	0	0
BTSC_BT127_L_CCACTACAGCCTTGAT	-13.0361	3.11024	BT127_L	BT127	GSC	0	0	0	0	0	0	0	0	0	0
BTSC_BT127_L_CCACTACTCGAGAGCA	-9.58215	21.3168	BT127_L	BT127	GSC	0.225108	0	0	0	0	0	0.399014	0	0	0.441079
BTSC_BT127_L_CCAGCGACATTCGACA	-12.1154	7.57073	BT127_L	BT127	GSC	0	0	0.355249	0	0	0	0.128073	0	0	0
BTSC_BT127_L_CCAGCGAGTAATCACC	-20.9159	6.71778	BT127_L	BT127	GSC	0	0	0	0	0	0	0	0	0	0
BTSC_BT127_L_CCAGCGATCTGTCTAT	-9.75111	12.7094	BT127_L	BT127	GSC	0	0	0	0	0	0	0.329585	0	0	0
BTSC_BT127_L_CCATGTCTCAGCTCGG	-4.47876	7.22698	BT127_L	BT127	GSC	0.180038	0	0.274525	0	0	0.179241	0.165045	0.171001	0	0
BTSC_BT127_L_CCATGTCTCCTGCCAT	-15.1332	13.9323	BT127_L	BT127	GSC	0	0	0	0	0	0.401236	0	0	0	0.338065
BTSC_BT127_L_CCATTCGAGAGCCTAG	-6.24514	12.4839	BT127_L	BT127	GSC	0	0	0	0	0	0	0	0	0	0.551657
BTSC_BT127_L_CCATTCGAGGCCATAG	-11.092	15.2637	BT127_L	BT127	GSC	0	0	0	0	0	0.393535	0	0.248289	0	0
BTSC_BT127_L_CCATTCGGTAGCGCTC	-6.82604	11.4169	BT127_L	BT127	GSC	0	0	0	0	0	0.217695	0	0	0	0.276222
BTSC_BT127_L_CCATTCGTCCATGAGT	-15.0163	6.31274	BT127_L	BT127	GSC	0	0	0	0	0	0.409825	0	0	0	0
BTSC_BT127_L_CCATTCGTCCTTGACC	-4.33266	11.2597	BT127_L	BT127	GSC	0	0	0	0	0	0	0	0.347862	0.340055	0
BTSC_BT127_L_CCCAATCGTAGAGGAA	-11.7545	13.7269	BT127_L	BT127	GSC	0.148326	0	0	0	0	0.244229	0.224886	0	0	0.187369
BTSC_BT127_L_CCCAATCGTCAAACTC	-8.76322	8.78236	BT127_L	BT127	GSC	0.121341	0	0	0	0	0.27015	0.188959	0.419462	0	0
BTSC_BT127_L_CCCAGTTAGGAGTCTG	-17.6577	3.89152	BT127_L	BT127	GSC	0	0	0	0	0	0	0.560973	0	0	0
BTSC_BT127_L_CCCAGTTTCCTAGAAC	-6.68004	9.51028	BT127_L	BT127	GSC	0	0	0	0	0.303455	0	0	0	0	0.246396
BTSC_BT127_L_CCCATACTCACTCTTA	-16.3238	10.4419	BT127_L	BT127	GSC	0.173266	0	0	0	0	0	0.256828	0.62811	0	0
BTSC_BT127_L_CCCATACTCCTCGCAT	-6.64554	10.7656	BT127_L	BT127	GSC	0	0	0	0	0	0.22109	0.20358	0.327909	0.31676	0
BTSC_BT127_L_CCCATACTCGTGGTCG	-9.0256	8.71438	BT127_L	BT127	GSC	0	0	0	0	0	0.30882	0	0.522887	0.278776	0
BTSC_BT127_L_CCCTCCTAGGCTCATT	-18.9292	-7.81615	BT127_L	BT127	GSC	0	0	0	0	0	0	0	0	0	0
BTSC_BT127_L_CCCTCCTTCTAACGGT	-11.077	9.9067	BT127_L	BT127	GSC	0	0	0	0	0	0	0	0	0	0
BTSC_BT127_L_CCGGGATAGTGGGCTA	-17.9778	20.7776	BT127_L	BT127	GSC	0	0	0	0	0	0.555539	0	0.300159	0	0
BTSC_BT127_L_CCGGTAGAGTACGTAA	-11.051	8.81931	BT127_L	BT127	GSC	0	0	0	0	0	0	0	0.309261	0	0
BTSC_BT127_L_CCGGTAGAGTAGTGCG	-2.79872	3.54419	BT127_L	BT127	GSC	0	0	0	0	0	0	0	0	0	0
BTSC_BT127_L_CCGGTAGGTGACGGTA	-21.352	17.0963	BT127_L	BT127	GSC	0	0	0	0	0	0	0	0.490734	0	0
BTSC_BT127_L_CCGGTAGGTGGTAACG	-16.5578	2.78645	BT127_L	BT127	GSC	0	0	0	0	0	0.5738	0.528356	0	0	0
BTSC_BT127_L_CCGGTAGTCGTTTGCC	-14.9789	-2.63588	BT127_L	BT127	GSC	0	0	0	0	0	0	0	0	0	0
BTSC_BT127_L_CCGGTAGTCTACTATC	0.594006	13.6343	BT127_L	BT127	GSC	0.124425	0	0.189725	0	0	0	0	0.262895	0.300523	0.26615
BTSC_BT127_L_CCGTACTCACGGCCAT	-18.9423	18.7449	BT127_L	BT127	GSC	0	0	0	0	0	0	0.227233	0.443886	0	0.477847
BTSC_BT127_L_CCGTACTCATCCCATC	-3.91282	16.6811	BT127_L	BT127	GSC	0.113571	0	0	0.192484	0	0.113068	0.104113	0.10787	0	0
BTSC_BT127_L_CCGTACTGTTTGTTTC	-13.991	10.0948	BT127_L	BT127	GSC	0.160016	0	0	0	0	0.33511	0.14669	0.248657	0	0.202136
BTSC_BT127_L_CCGTGGAAGGCTCTTA	1.20401	19.7615	BT127_L	BT127	GSC	0	0	0	0	0	0	0.260526	0.122207	0	0.358999
BTSC_BT127_L_CCGTGGACAAGGACTG	-18.1889	1.9748	BT127_L	BT127	GSC	0	0	0	0	0	0	0	0	0	0
BTSC_BT127_L_CCGTGGATCGCTGATA	-10.7496	14.6153	BT127_L	BT127	GSC	0	0	0	0	0	0.244128	0	0	0	0
BTSC_BT127_L_CCGTTCAAGCTGCAAG	-8.35312	10.6254	BT127_L	BT127	GSC	0.105064	0	0.160203	0	0	0.240797	0.0963143	0.229727	0	0
BTSC_BT127_L_CCGTTCATCAGGCAAG	-2.97327	8.16222	BT127_L	BT127	GSC	0.139669	0	0	0	0	0.0779763	0.128037	0	0	0
BTSC_BT127_L_CCTAAAGAGAACTGTA	-16.5485	8.61067	BT127_L	BT127	GSC	0	0	0	0	0	0	0	0.409497	0	0.544626
BTSC_BT127_L_CCTAAAGCACGGTGTC	-15.4276	8.11755	BT127_L	BT127	GSC	0	0	0.202263	0.224815	0	0.13206	0.121601	0	0	0.167563
BTSC_BT127_L_CCTAAAGTCAGAGACG	-16.405	7.52912	BT127_L	BT127	GSC	0	0	0	0	0	0	0	0	0	0.413982
BTSC_BT127_L_CCTACACAGGCTAGCA	-5.03075	9.06196	BT127_L	BT127	GSC	0.325738	0	0	0	0	0	0.298611	0.145631	0.218702	0
BTSC_BT127_L_CCTACACAGTGTACCT	-0.751659	21.8588	BT127_L	BT127	GSC	0	0	0	0	0	0.376513	0.346694	0	0	0
BTSC_BT127_L_CCTACACCAAACCCAT	-12.8621	8.72077	BT127_L	BT127	GSC	0.289607	0	0.200965	0	0	0.220528	0.120821	0	0.187991	0.166488
BTSC_BT127_L_CCTACACGTAGAGGAA	-7.12868	10.8653	BT127_L	BT127	GSC	0	0	0	0	0	0	0.495379	0	0	0.381943
BTSC_BT127_L_CCTACCACAACGATCT	-5.29045	13.7975	BT127_L	BT127	GSC	0	0	0	0	0	0.223384	0.122626	0	0	0.168976
BTSC_BT127_L_CCTACCACATAAAGGT	-4.68514	6.11354	BT127_L	BT127	GSC	0	0	0.273487	0	0.279036	0	0	0	0	0.226569
BTSC_BT127_L_CCTACCATCGGTGTTA	-6.80651	7.04589	BT127_L	BT127	GSC	0	0	0	0	0	0	0.277047	0	0	0
BTSC_BT127_L_CCTACCATCTTTACAC	-6.57804	11.9595	BT127_L	BT127	GSC	0	0	0	0	0	0	0	0	0	0.206297
BTSC_BT127_L_CCTAGCTCAGCGAACA	-15.1389	2.4571	BT127_L	BT127	GSC	0	0	0	0	0	0	0.372387	0	0	0
BTSC_BT127_L_CCTAGCTCAGTATAAG	-13.4464	-4.09165	BT127_L	BT127	GSC	0	0	0	0	0	0	0	0	0	0
BTSC_BT127_L_CCTAGCTCATTGGCGC	-5.55634	13.0926	BT127_L	BT127	GSC	0	0	0	0	0.237347	0.250206	0	0	0	0.317472
BTSC_BT127_L_CCTAGCTTCACGACTA	-16.2348	-1.33568	BT127_L	BT127	GSC	0	0	0	0	0	0	0	0	0	0
BTSC_BT127_L_CCTAGCTTCACTGGGC	-10.1063	7.73626	BT127_L	BT127	GSC	0	0	0	0	0	0	0.489258	0	0	0.476345
BTSC_BT127_L_CCTATTACATACGCTA	-11.7022	8.59021	BT127_L	BT127	GSC	0	0	0.34704	0	0	0	0	0	0	0.554325
BTSC_BT127_L_CCTATTAGTCCGTCAG	-12.444	11.829	BT127_L	BT127	GSC	0	0	0	0	0	0.392864	0	0.374803	0	0
BTSC_BT127_L_CCTATTAGTTCACCTC	-17.7328	-12.6061	BT127_L	BT127	GSC	0	0	0	0	0	0	0	0	0	0
BTSC_BT127_L_CCTATTATCTAAGCCA	-13.6782	14.1742	BT127_L	BT127	GSC	0	0	0	0	0	0	0.300698	0	0	0
BTSC_BT127_L_CCTATTATCTTCATGT	-17.7481	0.870647	BT127_L	BT127	GSC	0	0	0	0	0	0	0	0.356955	0	0.474746
BTSC_BT127_L_CCTCAGTCATAGAAAC	-4.95023	13.7587	BT127_L	BT127	GSC	0	0	0	0	0	0	0	0	0	0
BTSC_BT127_L_CCTCAGTTCTCCTATA	-4.77694	16.7769	BT127_L	BT127	GSC	0	0	0	0	0.332936	0	0.306852	0	0	0
BTSC_BT127_L_CCTCTGAAGTCCTCCT	-13.2732	12.63	BT127_L	BT127	GSC	0	0	0	0	0	0	0	0.326234	0	0
BTSC_BT127_L_CCTCTGACATGTCGAT	-11.3938	9.0685	BT127_L	BT127	GSC	0	0	0	0	0	0	0	0	0	0
BTSC_BT127_L_CCTCTGAGTTCCTCCA	-6.34711	11.6452	BT127_L	BT127	GSC	0	0	0	0	0	0	0	0	0	0
BTSC_BT127_L_CCTCTGATCCGTAGTA	1.72649	8.3743	BT127_L	BT127	GSC	0	0	0	0	0	0	0.184542	0	0	0
BTSC_BT127_L_CCTTACGAGAACAATC	-13.9532	8.42286	BT127_L	BT127	GSC	0	0	0	0	0	0.360377	0	0	0	0
BTSC_BT127_L_CCTTACGAGAATTGTG	-11.8668	6.1448	BT127_L	BT127	GSC	0	0	0	0	0	0	0.210723	0.218327	0	0.173757
BTSC_BT127_L_CCTTACGCATGAAGTA	-4.17566	16.8668	BT127_L	BT127	GSC	0	0	0	0	0	0	0.230075	0	0	0
BTSC_BT127_L_CCTTACGGTCTTCGTC	-14.9828	-4.22199	BT127_L	BT127	GSC	0	0	0	0	0	0	0	0	0	0
BTSC_BT127_L_CCTTCCCCAGTGGGAT	-9.33419	14.4222	BT127_L	BT127	GSC	0.0755012	0	0.115125	0	0	0.373221	0.169004	0.249693	0	0.373009
BTSC_BT127_L_CCTTCCCGTGCTAGCC	-14.8177	-2.35181	BT127_L	BT127	GSC	0	0	0	0	0	0	0	0	0	0
BTSC_BT127_L_CCTTCGAAGAGAACAG	-13.042	6.38946	BT127_L	BT127	GSC	0	0	0	0	0	0.455344	0	0	0	0
BTSC_BT127_L_CCTTCGAAGTATTGGA	-6.09752	9.25319	BT127_L	BT127	GSC	0	0	0	0	0	0	0	0.155626	0	0.206981
BTSC_BT127_L_CCTTCGACAGACTCGC	-14.2874	19.2232	BT127_L	BT127	GSC	0	0	0	0	0	0.255598	0.439623	0.369884	0	0
BTSC_BT127_L_CCTTCGAGTTTAGCTG	-12.7646	10.2539	BT127_L	BT127	GSC	0	0	0	0	0	0	0	0	0	0
BTSC_BT127_L_CCTTCGATCAGTGCAT	-6.24673	6.26945	BT127_L	BT127	GSC	0.202351	0	0	0	0.314809	0	0	0	0	0
BTSC_BT127_L_CCTTCGATCGCAAGCC	3.44374	19.001	BT127_L	BT127	GSC	0.171254	0	0	0	0	0.170496	0.156993	0.162658	0	0
BTSC_BT127_L_CCTTCGATCTTATCTG	-16.8229	11.6075	BT127_L	BT127	GSC	0	0	0	0	0	0	0	0.370892	0	0
BTSC_BT127_L_CCTTTCTAGCGGATCA	-1.65356	13.5226	BT127_L	BT127	GSC	0	0	0	0	0	0	0	0	0	0
BTSC_BT127_L_CCTTTCTGTAGTAGTA	-13.6456	11.3025	BT127_L	BT127	GSC	0.221673	0	0	0	0	0.220691	0	0.210545	0	0
BTSC_BT127_L_CGAATGTCAAGCGATG	-10.4679	4.90483	BT127_L	BT127	GSC	0	0	0	0	0	0	0	0	0	0.555019
BTSC_BT127_L_CGAATGTCACGGATAG	-12.0074	13.262	BT127_L	BT127	GSC	0	0	0	0	0.844286	0	0.497492	0.365572	0	0.486206
BTSC_BT127_L_CGAATGTGTTAAGGGC	-9.11092	9.53566	BT127_L	BT127	GSC	0	0	0	0	0	0	0.421798	0	0	0
BTSC_BT127_L_CGAATGTTCACATACG	-8.34842	6.60143	BT127_L	BT127	GSC	0	0	0	0	0	0	0	0	0	0
BTSC_BT127_L_CGAATGTTCCTAGGGC	-12.6174	2.13763	BT127_L	BT127	GSC	0	0	0	0	0	0	0	0	0	0
BTSC_BT127_L_CGACCTTAGCCTCGTG	-16.6365	3.30666	BT127_L	BT127	GSC	0	0	0	0	0	0	0.474235	0	0	0
BTSC_BT127_L_CGACCTTGTAAATACG	-6.01082	10.1984	BT127_L	BT127	GSC	0	0	0	0	0	0	0.340403	0.230226	0	0
BTSC_BT127_L_CGACCTTGTAGCTAAA	-7.23809	7.39197	BT127_L	BT127	GSC	0	0	0	0	0	0	0	0	0	0.374227
BTSC_BT127_L_CGACTTCAGCGATAGC	-22.3341	5.50651	BT127_L	BT127	GSC	0	0	0	0	0	0	0	0	0	0
BTSC_BT127_L_CGACTTCAGGATGTAT	-12.578	16.7675	BT127_L	BT127	GSC	0.283659	0	0	0	0	0	0.260037	0	0	0
BTSC_BT127_L_CGACTTCGTCTAGCGC	-14.1042	2.7806	BT127_L	BT127	GSC	0	0	0	0	0	0	0.298662	0.309439	0	0
BTSC_BT127_L_CGACTTCTCAGGTTCA	-15.2881	8.98148	BT127_L	BT127	GSC	0	0	0	0	0	0.535019	0	0.361205	0	0
BTSC_BT127_L_CGAGAAGGTGGTCTCG	-17.1955	12.3907	BT127_L	BT127	GSC	0.101588	0	0	0	0	0	0.0931281	0.374829	0.251449	0.297349
BTSC_BT127_L_CGAGAAGTCGGTTAAC	5.85513	13.3168	BT127_L	BT127	GSC	0.343382	0	0	0	0	0	0.150563	0	0	0.207473
BTSC_BT127_L_CGAGAAGTCTATGTGG	-14.8615	11.9903	BT127_L	BT127	GSC	0	0	0	0	0	0	0.324175	0	0	0
BTSC_BT127_L_CGAGCACAGTCATCCA	-9.20201	9.50648	BT127_L	BT127	GSC	0.194416	0	0	0	0	0.193555	0	0.370595	0	0
BTSC_BT127_L_CGAGCCATCATAGCAC	-15.1647	12.5563	BT127_L	BT127	GSC	0	0	0	0	0	0.401942	0	0.254729	0	0
BTSC_BT127_L_CGATCGGAGAGGTTGC	-4.13879	11.0928	BT127_L	BT127	GSC	0.204339	0	0	0	0	0	0.187322	0	0	0
BTSC_BT127_L_CGATCGGGTCGATTGT	-19.5331	-11.5645	BT127_L	BT127	GSC	0	0	0	0	0	0	0	0	0	0
BTSC_BT127_L_CGATCGGGTTTGACTG	-11.3315	-5.87886	BT127_L	BT127	GSC	0.659313	0	0	0	0	0	0	0	0	0
BTSC_BT127_L_CGATCGGGTTTGTTTC	2.75877	18.7618	BT127_L	BT127	GSC	0	0	0	0	0	0	0.203839	0.211195	0	0
BTSC_BT127_L_CGATGGCAGTGGTAGC	-17.0014	-14.9997	BT127_L	BT127	GSC	0	0	0	0	0	0	0	0	0	0
BTSC_BT127_L_CGATGGCCAGTATAAG	-4.62823	17.9871	BT127_L	BT127	GSC	0	0	0	0	0	0.300946	0	0.363591	0	0.239437
BTSC_BT127_L_CGATGGCGTCGCGTGT	-10.2529	10.1171	BT127_L	BT127	GSC	0	0	0	0	0	0	0	0	0	0
BTSC_BT127_L_CGATGTAGTATAGGTA	-11.7667	10.2827	BT127_L	BT127	GSC	0	0	0	0	0	0	0	0	0	0.484758
BTSC_BT127_L_CGATGTAGTTAAGTAG	-16.4262	-0.357052	BT127_L	BT127	GSC	0	0	0	0	0	0	0	0	0	0
BTSC_BT127_L_CGATGTAGTTCGAATC	-11.8567	4.2777	BT127_L	BT127	GSC	0	0	0	0	0	0	0	0	0	0
BTSC_BT127_L_CGATTGATCCTAGTGA	0.961779	18.5166	BT127_L	BT127	GSC	0	0	0.307227	0	0	0.264632	0.108378	0	0	0.25452
BTSC_BT127_L_CGATTGATCGGATGGA	-18.1993	-2.82071	BT127_L	BT127	GSC	0	0	0	0	0	0	0	0	0	0
BTSC_BT127_L_CGCCAAGAGGAGTCTG	-13.0104	15.1411	BT127_L	BT127	GSC	0	0	0	0	0	0.301017	0.173808	0	0	0.239504
BTSC_BT127_L_CGCCAAGCACAGGTTT	-1.48924	15.0216	BT127_L	BT127	GSC	0	0	0	0	0	0	0	0	0	0
BTSC_BT127_L_CGCCAAGGTCGCGAAA	-16.4908	9.37083	BT127_L	BT127	GSC	0	0	0	0	0	0	0.220988	0	0	0
BTSC_BT127_L_CGCCAAGTCCAAGTAC	-0.435667	10.1439	BT127_L	BT127	GSC	0	0	0	0	0	0.205297	0.189038	0	0	0
BTSC_BT127_L_CGCGTTTAGCTAGCCC	-10.3275	8.08866	BT127_L	BT127	GSC	0	0	0	0	0	0	0	0.203823	0	0
BTSC_BT127_L_CGCGTTTAGTACGTAA	-2.72662	14.6021	BT127_L	BT127	GSC	0	0	0	0	0	0	0	0	0	0
BTSC_BT127_L_CGCGTTTGTCAAAGAT	-8.68289	14.8933	BT127_L	BT127	GSC	0	0	0	0	0	0	0	0	0	0.445323
BTSC_BT127_L_CGCGTTTTCTTATCTG	-6.17188	5.98791	BT127_L	BT127	GSC	0	0	0	0	0	0	0	0	0	0
BTSC_BT127_L_CGCTATCAGGATATAC	-11.6764	13.202	BT127_L	BT127	GSC	0	0	0	0	0	0.618678	0.246923	0.327962	0	0.208987
BTSC_BT127_L_CGCTATCCAAGGACTG	-17.363	-0.92718	BT127_L	BT127	GSC	0	0	0	0	0	0	0	0.436842	0	0
BTSC_BT127_L_CGCTTCAAGGGAGTAA	-1.88346	16.0248	BT127_L	BT127	GSC	0.174859	0	0.266628	0	0	0.419337	0.330172	0.268172	0	0
BTSC_BT127_L_CGGACACCATACGCTA	-17.6065	9.41253	BT127_L	BT127	GSC	0	0	0	0	0	0	0	0	0	0
BTSC_BT127_L_CGGACACGTTAAGATG	-11.441	10.8682	BT127_L	BT127	GSC	0	0	0	0	0	0.446167	0	0.583403	0	0
BTSC_BT127_L_CGGACACTCAAAGACA	-9.82335	18.5152	BT127_L	BT127	GSC	0	0	0	0	0	0	0.540443	0	0	0.430664
BTSC_BT127_L_CGGACGTAGAGTGAGA	-15.8471	8.06834	BT127_L	BT127	GSC	0.402551	0	0	0	0	0	0	0	0	0
BTSC_BT127_L_CGGACGTAGTACGCGA	-12.821	16.0515	BT127_L	BT127	GSC	0.248846	0	0	0	0	0	0	0	0	0
BTSC_BT127_L_CGGACGTGTTCTGGTA	-11.6935	0.365278	BT127_L	BT127	GSC	0	0	0	0	0	0	0	0	0	0
BTSC_BT127_L_CGGACTGAGTCCCACG	-12.7702	12.8157	BT127_L	BT127	GSC	0	0	0	0	0	0.444026	0.174049	0.180329	0	0.239835
BTSC_BT127_L_CGGACTGCAATCTGCA	-16.2672	0.282832	BT127_L	BT127	GSC	0	0	0	0	0	0	0	0	0	0
BTSC_BT127_L_CGGACTGCACGTCTCT	-3.54739	11.8832	BT127_L	BT127	GSC	0.21402	0	0	0	0	0	0.196197	0	0	0
BTSC_BT127_L_CGGACTGTCAGATAAG	1.75642	18.5454	BT127_L	BT127	GSC	0	0	0	0	0	0	0.174085	0.287564	0	0
BTSC_BT127_L_CGGAGCTAGAGCTGCA	-2.65138	11.3522	BT127_L	BT127	GSC	0	0	0	0	0	0	0	0.232606	0	0
BTSC_BT127_L_CGGAGCTCAATGGATA	-5.06277	4.03975	BT127_L	BT127	GSC	0.421141	0	0	0	0	0	0	0	0	0.272008
BTSC_BT127_L_CGGAGCTTCCATGCTC	-11.9706	19.2461	BT127_L	BT127	GSC	0	0	0	0	0	0.210304	0.193648	0.455882	0	0
BTSC_BT127_L_CGGAGTCGTCGCATAT	-2.68205	5.60428	BT127_L	BT127	GSC	0	0	0	0	0	0	0	0	0	0.252525
BTSC_BT127_L_CGGAGTCTCAACACTG	-12.7566	11.7136	BT127_L	BT127	GSC	0.202682	0	0	0	0	0	0	0.192508	0	0.256033
BTSC_BT127_L_CGGCTAGAGTTAGCGG	-21.0417	-8.00679	BT127_L	BT127	GSC	0	0	0	0	0	0	0	0	0	0
BTSC_BT127_L_CGGCTAGGTACCATCA	-16.7526	7.53024	BT127_L	BT127	GSC	0	0	0	0	0	0	0.280453	0	0.436371	0.568311
BTSC_BT127_L_CGGCTAGGTCGCTTCT	-13.4794	21.4855	BT127_L	BT127	GSC	0	0	0	0	0	0	0.206172	0.413131	0	0.169431
BTSC_BT127_L_CGGCTAGGTCTTGTCC	-8.27302	10.6478	BT127_L	BT127	GSC	0	0	0.412081	0	0.420442	0	0	0	0	0
BTSC_BT127_L_CGGCTAGTCTGTCAAG	-17.3196	0.247399	BT127_L	BT127	GSC	0	0	0	0	0	0	0	0	0	0
BTSC_BT127_L_CGGGTCAGTCACCTAA	-13.3512	-2.83132	BT127_L	BT127	GSC	0	0	0	0	0	0	0	0.575841	0	0
BTSC_BT127_L_CGGGTCATCCGTTGCT	-11.6168	-3.35431	BT127_L	BT127	GSC	0	0	0	0	0	0	0	0	0	0
BTSC_BT127_L_CGGTTAAGTATGGTTC	-7.78213	7.18677	BT127_L	BT127	GSC	0	0	0	0	0	0.169554	0.156126	0.0928111	0	0
BTSC_BT127_L_CGTAGGCGTTGTGGCC	-11.3197	5.77537	BT127_L	BT127	GSC	0.155824	0	0.237603	0	0	0	0.142848	0.148002	0.222264	0.196841
BTSC_BT127_L_CGTCACTCAATCCAAC	-15.1559	3.7052	BT127_L	BT127	GSC	0	0	0	0	0	0	0	0	0	0
BTSC_BT127_L_CGTCACTCAGCTGCAC	-15.3624	1.13964	BT127_L	BT127	GSC	0	0	0	0	0	0	0.593498	0	0	0
BTSC_BT127_L_CGTCACTCAGGCAGTA	-18.3406	-3.69128	BT127_L	BT127	GSC	0	0	0	0	0	0	0	0	0	0
BTSC_BT127_L_CGTCAGGCAAGCTGGA	-14.1874	17.7936	BT127_L	BT127	GSC	0	0	0	0	0	0	0.259826	0.584076	0	0.358034
BTSC_BT127_L_CGTCAGGCATTGGTAC	-3.64751	7.21353	BT127_L	BT127	GSC	0	0	0	0	0	0	0	0.429307	0	0
BTSC_BT127_L_CGTCAGGTCCAAATGC	-12.1522	18.3884	BT127_L	BT127	GSC	0.125496	0	0	0	0	0	0.255461	0.395766	0	0.268146
BTSC_BT127_L_CGTCAGGTCCACGTGG	-12.7171	9.12969	BT127_L	BT127	GSC	0	0	0	0	0	0	0.386298	0.400237	0	0
BTSC_BT127_L_CGTCAGGTCGTACGGC	-15.3766	4.7942	BT127_L	BT127	GSC	0	0	0	0	0	0	0.408156	0	0	0.381587
BTSC_BT127_L_CGTCCATTCAAGGCTT	-15.857	5.09253	BT127_L	BT127	GSC	0	0	0.37312	0	0	0	0	0	0	0.309109
BTSC_BT127_L_CGTCTACAGCCTATGT	-9.74534	17.0077	BT127_L	BT127	GSC	0.121215	0	0.314017	0	0	0.205025	0.111121	0.257519	0	0.153122
BTSC_BT127_L_CGTCTACAGGCATGGT	-11.151	1.56696	BT127_L	BT127	GSC	0	0	0	0	0	0	0	0	0	0
BTSC_BT127_L_CGTCTACAGGTGTTAA	-11.1721	-4.71939	BT127_L	BT127	GSC	0	0	0	0	0	0	0	0	0	0
BTSC_BT127_L_CGTCTACGTCTGATCA	-13.1852	9.11728	BT127_L	BT127	GSC	0	0	0	0	0	0	0	0	0	0
BTSC_BT127_L_CGTGAGCAGAACAATC	-7.30892	13.9817	BT127_L	BT127	GSC	0	0	0	0	0	0	0.266396	0.409647	0	0.367088
BTSC_BT127_L_CGTGAGCAGCAACGGT	-0.410341	9.4966	BT127_L	BT127	GSC	0.316139	0	0	0	0	0.243059	0.289812	0	0	0.308404
BTSC_BT127_L_CGTGAGCAGGTGTTAA	-8.41087	5.93085	BT127_L	BT127	GSC	0.258963	0	0	0	0	0.390487	0	0	0	0
BTSC_BT127_L_CGTGAGCGTCTCGTTC	-12.015	5.33485	BT127_L	BT127	GSC	0	0	0	0	0	0	0	0	0	0
BTSC_BT127_L_CGTGAGCGTTACTGAC	-12.2264	4.0484	BT127_L	BT127	GSC	0	0	0	0	0	0	0	0	0	0.46988
BTSC_BT127_L_CGTGAGCTCGTTTAGG	5.863	21.1139	BT127_L	BT127	GSC	0	0	0	0	0	0	0	0	0	0
BTSC_BT127_L_CGTGTAACACTTAAGC	-6.19867	2.14755	BT127_L	BT127	GSC	0	0	0	0	0	0	0	0	0	0.3762
BTSC_BT127_L_CGTGTAACATATACCG	-4.73034	10.9045	BT127_L	BT127	GSC	0	0	0	0	0	0	0	0	0	0
BTSC_BT127_L_CGTGTAATCTTGACGA	-11.1672	4.26379	BT127_L	BT127	GSC	0	0	0	0	0	0	0	0	0	0
BTSC_BT127_L_CGTGTCTAGCGTGAGT	-15.9115	-14.436	BT127_L	BT127	GSC	0	0	0	0	0	0	0	0	0	0
BTSC_BT127_L_CGTGTCTAGCTAAACA	1.90414	17.7991	BT127_L	BT127	GSC	0	0	0	0	0	0	0.164282	0.273814	0	0.226377
BTSC_BT127_L_CGTGTCTCAAGTAGTA	-17.0197	13.0712	BT127_L	BT127	GSC	0	0	0	0	0	0	0	0	0	0
BTSC_BT127_L_CGTTAGACACCTTGTC	-13.6343	0.282223	BT127_L	BT127	GSC	0	0	0	0	0	0	0	0	0	0
BTSC_BT127_L_CGTTCTGGTTAAGATG	-13.7778	-3.9244	BT127_L	BT127	GSC	0	0	0	0	0	0	0	0	0	0
BTSC_BT127_L_CGTTCTGTCTAAGCCA	-7.22765	9.04142	BT127_L	BT127	GSC	0	0	0	0	0	0	0	0	0	0.226465
BTSC_BT127_L_CGTTGGGAGCCTATGT	-5.22353	2.6955	BT127_L	BT127	GSC	0	0	0	0	0.277086	0	0	0	0	0.461359
BTSC_BT127_L_CTAACTTAGGGTATCG	-8.16267	12.5884	BT127_L	BT127	GSC	0	0	0	0	0	0	0	0	0	0
BTSC_BT127_L_CTAACTTCAGCTTAAC	-18.6507	-3.75126	BT127_L	BT127	GSC	0	0	0	0	0	0	0.51663	0	0	0
BTSC_BT127_L_CTAACTTGTTGACGTT	-17.1636	8.37406	BT127_L	BT127	GSC	0	0	0	0	0	0	0	0	0	0.500927
BTSC_BT127_L_CTAACTTTCCGGGTGT	-14.8303	3.31411	BT127_L	BT127	GSC	0	0	0	0	0	0	0	0.443613	0	0.59
BTSC_BT127_L_CTAAGACGTACCTACA	-19.0996	-6.53325	BT127_L	BT127	GSC	0	0	0	0	0	0	0	0	0	0
BTSC_BT127_L_CTAAGACGTTAGAACA	-17.1181	-4.95476	BT127_L	BT127	GSC	0	0	0	0	0	0	0	0	0	0
BTSC_BT127_L_CTAAGACTCAATCTCT	1.94252	6.62289	BT127_L	BT127	GSC	0	0	0.444342	0	0	0	0	0	0	0
BTSC_BT127_L_CTAATGGGTGAGGGAG	-11.382	11.3202	BT127_L	BT127	GSC	0	0	0	0	0	0	0	0	0	0.389969
BTSC_BT127_L_CTACACCAGAGTACAT	-8.23743	13.8037	BT127_L	BT127	GSC	0	0	0	0	0	0.114509	0.391507	0.186815	0	0.145294
BTSC_BT127_L_CTACACCGTCCTCCAT	-13.1906	8.31096	BT127_L	BT127	GSC	0	0	0	0	0	0	0	0	0	0.248757
BTSC_BT127_L_CTACACCTCGGATGTT	-13.5677	-5.59211	BT127_L	BT127	GSC	0.577168	0	0	0	0	0	0	0	0	0
BTSC_BT127_L_CTACCCAAGAATCTCC	-9.13597	13.3406	BT127_L	BT127	GSC	0.251047	0	0	0	0	0	0.54498	0.238445	0	0
BTSC_BT127_L_CTACCCAAGACCCACC	-11.3832	21.3596	BT127_L	BT127	GSC	0	0	0	0	0	0	0.269399	0	0	0.231568
BTSC_BT127_L_CTACCCATCTCAACTT	2.35546	15.4392	BT127_L	BT127	GSC	0.187754	0	0	0	0	0.534771	0	0	0	0.237175
BTSC_BT127_L_CTACCCATCTCGCTTG	-11.0853	3.82161	BT127_L	BT127	GSC	0	0	0	0	0	0	0	0	0	0
BTSC_BT127_L_CTACGTCAGTCAATAG	-7.05395	-2.02264	BT127_L	BT127	GSC	0	0	0	0	0	0	0	0.116798	0	0.413782
BTSC_BT127_L_CTACGTCCAATGTAAG	-6.96017	12.4701	BT127_L	BT127	GSC	0	0	0	0	0	0.207419	0	0.390291	0	0
BTSC_BT127_L_CTACGTCCATCTACGA	-1.7031	13.43	BT127_L	BT127	GSC	0	0	0	0	0	0	0.18658	0	0	0
BTSC_BT127_L_CTACGTCGTCCGAGTC	-18.4587	-11.533	BT127_L	BT127	GSC	0	0	0	0	0	0	0	0	0	0
BTSC_BT127_L_CTACGTCGTCGCCATG	-14.793	-6.98074	BT127_L	BT127	GSC	0	0	0	0	0	0	0.923917	0	0	0
BTSC_BT127_L_CTACGTCGTTCCACTC	-10.3006	1.60079	BT127_L	BT127	GSC	0	0	0	0	0	0	0.299074	0	0	0
BTSC_BT127_L_CTAGAGTAGACTCGGA	-10.4885	6.46176	BT127_L	BT127	GSC	0	0	0	0	0	0	0	0	0	0
BTSC_BT127_L_CTAGAGTCAACTGCGC	-18.1036	14.9208	BT127_L	BT127	GSC	0	0	0	0	0	0	0	0	0	0
BTSC_BT127_L_CTAGAGTCAAGCCTAT	-15.8131	13.3897	BT127_L	BT127	GSC	0	0	0	0	0	0	0	0	0	0
BTSC_BT127_L_CTAGAGTCACCCATGG	-11.7879	1.50375	BT127_L	BT127	GSC	0	0	0	0	0	0	0	0	0	0.60391
BTSC_BT127_L_CTAGCCTAGGCTACGA	-8.32627	11.5041	BT127_L	BT127	GSC	0	0	0	0	0	0.277276	0	0.264529	0	0
BTSC_BT127_L_CTAGCCTCACGACGAA	-11.9161	-1.9356	BT127_L	BT127	GSC	0	0	0	0	0	0	0	0	0	0
BTSC_BT127_L_CTAGCCTTCAACGGGA	-16.9915	6.22143	BT127_L	BT127	GSC	0	0	0	0	0	0	0	0	0	0
BTSC_BT127_L_CTAGCCTTCCTATGTT	-23.0946	14.7891	BT127_L	BT127	GSC	0	0	0	0	0	0	0	0.283282	0	0.376761
BTSC_BT127_L_CTAGCCTTCGCGTAGC	-8.15702	14.5386	BT127_L	BT127	GSC	0	0	0	0	0	0	0	0	0	0
BTSC_BT127_L_CTAGTGAAGTGACTCT	-16.7164	8.59904	BT127_L	BT127	GSC	0	0	0	0	0	0	0	0.225317	0.146302	0.299669
BTSC_BT127_L_CTAGTGAGTCAGGACA	-4.56568	21.9099	BT127_L	BT127	GSC	0	0	0	0	0	0	0	0	0	0
BTSC_BT127_L_CTCACACAGTAGGCCA	-4.5642	7.88773	BT127_L	BT127	GSC	0	0	0	0	0	0	0.170728	0.282876	0	0.235259
BTSC_BT127_L_CTCAGAACAGGGAGAG	-18.0143	9.88726	BT127_L	BT127	GSC	0	0	0	0	0	0	0	0.478295	0	0
BTSC_BT127_L_CTCAGAAGTTCAACCA	-8.45368	9.39024	BT127_L	BT127	GSC	0	0	0	0	0	0.197373	0	0.376066	0	0
BTSC_BT127_L_CTCATTAAGACTGTAA	-12.2043	2.90779	BT127_L	BT127	GSC	0	0	0	0	0	0	0.141631	0	0	0.320923
BTSC_BT127_L_CTCATTAAGGCAATTA	-2.71655	10.9793	BT127_L	BT127	GSC	0.396244	0	0	0	0	0	0.288041	0	0	0
BTSC_BT127_L_CTCATTAAGTGGAGAA	-13.9491	-1.09692	BT127_L	BT127	GSC	0	0	0	0	0	0	0	0	0	0
BTSC_BT127_L_CTCATTACATACGCCG	-6.87661	13.4277	BT127_L	BT127	GSC	0	0	0	0	0	0	0.178327	0	0	0.24573
BTSC_BT127_L_CTCATTACATCCTAGA	-5.88802	7.25325	BT127_L	BT127	GSC	0	0	0	0	0	0	0	0	0	0
BTSC_BT127_L_CTCATTAGTCAAAGCG	-11.3616	22.4479	BT127_L	BT127	GSC	0	0	0	0	0	0.262441	0	0.378047	0.23009	0.203772
BTSC_BT127_L_CTCCTAGTCACCAGGC	-4.83811	13.1514	BT127_L	BT127	GSC	0	0	0	0	0	0.164352	0	0.505956	0	0
BTSC_BT127_L_CTCGAAATCTTAGAGC	-6.4482	17.2511	BT127_L	BT127	GSC	0	0	0	0	0	0	0	0	0	0
BTSC_BT127_L_CTCGAGGCACCATCCT	-8.46499	13.6877	BT127_L	BT127	GSC	0.128772	0	0	0	0	0.456198	0	0.514889	0	0.162668
BTSC_BT127_L_CTCGGAGAGTCAAGGC	-14.9704	-6.68386	BT127_L	BT127	GSC	0	0	0	0	0	0	0	0	0	0
BTSC_BT127_L_CTCGGAGCAACGATCT	-20.6044	21.199	BT127_L	BT127	GSC	0	0	0.381615	0	0.389358	0	0.229428	0.237706	0	0
BTSC_BT127_L_CTCGGAGCAATACGCT	-13.2885	9.99413	BT127_L	BT127	GSC	0	0	0	0	0	0	0	0	0	0.501501
BTSC_BT127_L_CTCGGGACACTTAAGC	-5.26412	13.4877	BT127_L	BT127	GSC	0	0	0	0	0	0	0	0.314697	0.223595	0.19802
BTSC_BT127_L_CTCGGGATCATCTGTT	-15.252	-8.09414	BT127_L	BT127	GSC	0	0	0	0	0	0	0	0	0	0
BTSC_BT127_L_CTCGTACAGTGAAGTT	-17.0684	2.11446	BT127_L	BT127	GSC	0	0	0	0	0	0	0	0	0	0
BTSC_BT127_L_CTCGTACAGTGGTAGC	-3.63752	10.4406	BT127_L	BT127	GSC	0	0	0	0	0	0	0	0.177757	0	0
BTSC_BT127_L_CTCGTCAAGCTAGGCA	-14.5583	-9.02313	BT127_L	BT127	GSC	0	0	0	0	0	0	0	0	0	0
BTSC_BT127_L_CTCGTCAAGTCAAGCG	-8.88308	7.98276	BT127_L	BT127	GSC	0	0	0	0	0	0	0	0	0	0.285289
BTSC_BT127_L_CTCGTCACATTAACCG	-10.3687	7.98016	BT127_L	BT127	GSC	0	0	0	0	0	0.358398	0	0	0	0
BTSC_BT127_L_CTCGTCAGTATATGGA	-5.59419	18.4405	BT127_L	BT127	GSC	0	0	0	0	0	0	0	0.199503	0	0.265337
BTSC_BT127_L_CTCTAATAGCACAGGT	-15.4628	1.65618	BT127_L	BT127	GSC	0	0	0	0	0	0	0	0	0	0
BTSC_BT127_L_CTCTAATAGGAATCGC	-14.7954	9.68071	BT127_L	BT127	GSC	0.0965374	0	0	0	0	0.0961098	0.088498	0.160022	0.240315	0.212828
BTSC_BT127_L_CTCTAATCAAACCTAC	-8.02774	13.5449	BT127_L	BT127	GSC	0	0	0	0	0	0.378493	0	0.562276	0	0
BTSC_BT127_L_CTCTAATGTTAGAACA	-11.4025	6.9982	BT127_L	BT127	GSC	0	0	0.382314	0	0	0.151469	0	0.238142	0	0.316726
BTSC_BT127_L_CTCTAATTCAGGCCCA	-18.2072	-9.3927	BT127_L	BT127	GSC	0	0	0	0	0	0	0	0	0	0
BTSC_BT127_L_CTCTAATTCGTCACGG	-14.9015	17.9734	BT127_L	BT127	GSC	0	0	0	0	0	0.339231	0.390437	0.596462	0	0
BTSC_BT127_L_CTCTACGGTATTAGCC	-4.49171	19.5269	BT127_L	BT127	GSC	0.248348	0	0	0	0	0.247248	0	0	0.214615	0.190067
BTSC_BT127_L_CTCTACGGTCTGCGGT	-14.8858	4.73135	BT127_L	BT127	GSC	0	0	0	0	0	0	0	0	0	0
BTSC_BT127_L_CTCTACGTCTCTGAGA	-7.37009	5.25049	BT127_L	BT127	GSC	0	0	0.217889	0	0	0	0	0	0	0.300093
BTSC_BT127_L_CTCTACGTCTTTACGT	-5.62059	7.01584	BT127_L	BT127	GSC	0	0	0	0	0	0.212135	0	0	0	0
BTSC_BT127_L_CTCTGGTGTACATCCA	-5.69157	13.2726	BT127_L	BT127	GSC	0	0	0	0	0	0.175499	0	0	0	0
BTSC_BT127_L_CTCTGGTGTCAGAATA	-18.0928	-11.2439	BT127_L	BT127	GSC	0	0	0	0	0	0	0	0	0	0
BTSC_BT127_L_CTCTGGTTCCTCAACC	-7.3151	17.4051	BT127_L	BT127	GSC	0	0	0	0	0	0	0	0.181334	0.27232	0
BTSC_BT127_L_CTCTGGTTCTCTGAGA	-15.5845	9.99404	BT127_L	BT127	GSC	0	0	0	0	0	0	0	0	0	0
BTSC_BT127_L_CTGAAACCACATGACT	-21.7271	22.1389	BT127_L	BT127	GSC	0	0	0	0	0	0	0.51856	0.305852	0	0.511616
BTSC_BT127_L_CTGAAACGTACTCAAC	-15.5984	9.6416	BT127_L	BT127	GSC	0	0	0	0	0	0.326309	0	0	0	0
BTSC_BT127_L_CTGAAACTCATGTGGT	-13.2727	4.58529	BT127_L	BT127	GSC	0	0	0	0	0	0	0.384866	0	0	0
BTSC_BT127_L_CTGAAACTCTTATCTG	-6.04541	20.3194	BT127_L	BT127	GSC	0	0	0	0	0	0	0.369398	0.254135	0	0
BTSC_BT127_L_CTGAAGTAGTCAAGCG	-11.2587	1.00246	BT127_L	BT127	GSC	0.159472	0	0	0	0	0	0	0	0	0
BTSC_BT127_L_CTGAAGTCACCCATTC	-14.7001	11.9506	BT127_L	BT127	GSC	0	0	0	0	0	0	0	0	0	0.46693
BTSC_BT127_L_CTGAAGTCATCTCGCT	-7.00594	9.21692	BT127_L	BT127	GSC	0	0	0	0	0	0.112237	0.103348	0.183554	0	0.142411
BTSC_BT127_L_CTGAAGTCATGCAATC	-8.84995	7.99504	BT127_L	BT127	GSC	0	0	0	0	0	0	0	0	0	0
BTSC_BT127_L_CTGATAGAGAAGGTGA	-14.9181	13.416	BT127_L	BT127	GSC	0	0	0	0	0	0	0	0.145848	0	0.193976
BTSC_BT127_L_CTGATAGCATACAGCT	-6.25457	10.1342	BT127_L	BT127	GSC	0.187484	0	0	0	0	0	0	0	0	0
BTSC_BT127_L_CTGATAGGTGGTCCGT	-16.2403	-13.8846	BT127_L	BT127	GSC	0	0	0	0	0	0	0	0	0	0
BTSC_BT127_L_CTGATAGTCGCCATAA	-12.4117	11.1714	BT127_L	BT127	GSC	0	0	0	0	0	0	0	0	0	0
BTSC_BT127_L_CTGATAGTCTGCCCTA	-9.71547	6.17702	BT127_L	BT127	GSC	0	0	0	0	0	0	0.181688	0.188244	0.282697	0.250362
BTSC_BT127_L_CTGATCCAGGTGATAT	-2.00082	9.74447	BT127_L	BT127	GSC	0.33143	0	0	0	0	0	0.193874	0	0.301658	0
BTSC_BT127_L_CTGATCCCAAGTCATC	-2.52015	8.43773	BT127_L	BT127	GSC	0	0	0	0	0	0	0.339206	0.499158	0	0
BTSC_BT127_L_CTGATCCGTCAACATC	-13.0768	14.0588	BT127_L	BT127	GSC	0.303739	0	0	0	0	0.302394	0	0.424795	0	0
BTSC_BT127_L_CTGATCCGTTGAGGTG	-13.0371	8.69787	BT127_L	BT127	GSC	0.129464	0	0.197408	0	0	0	0.118682	0.403823	0	0.360748
BTSC_BT127_L_CTGCCTACACGCATCG	-11.1316	5.51853	BT127_L	BT127	GSC	0.36755	0	0	0	0	0	0	0	0	0
BTSC_BT127_L_CTGCCTACAGGGTACA	-12.2972	-5.74759	BT127_L	BT127	GSC	0	0	0	0	0	0	0	0	0	0
BTSC_BT127_L_CTGCCTATCATGCTCC	-0.635366	14.5618	BT127_L	BT127	GSC	0	0	0	0	0	0.29178	0	0	0	0
BTSC_BT127_L_CTGCCTATCCCATTTA	-12.9452	15.8037	BT127_L	BT127	GSC	0	0	0	0	0	0.102884	0.0947359	0.475764	0	0.416846
BTSC_BT127_L_CTGCGGACACATTTCT	-18.2832	0.213453	BT127_L	BT127	GSC	0	0	0	0	0	0	0.576133	0	0	0
BTSC_BT127_L_CTGCGGATCCAAGTAC	-3.95455	13.9162	BT127_L	BT127	GSC	0.172701	0	0	0.2927	0	0	0	0.164032	0	0
BTSC_BT127_L_CTGCGGATCCGAAGAG	-4.71858	10.7154	BT127_L	BT127	GSC	0	0	0	0	0.336629	0	0	0	0	0
BTSC_BT127_L_CTGCTGTCACGGACAA	-9.79219	13.8358	BT127_L	BT127	GSC	0	0	0	0	0	0	0	0	0	0
BTSC_BT127_L_CTGCTGTGTATCACCA	-7.93186	0.683301	BT127_L	BT127	GSC	0.292093	0	0.277523	0	0	0.181198	0.166848	0	0	0
BTSC_BT127_L_CTGCTGTGTTCACGGC	-14.5157	3.92805	BT127_L	BT127	GSC	0	0	0	0	0.284511	0	0	0	0	0.370474
BTSC_BT127_L_CTGCTGTTCGCAAGCC	-8.47146	8.0183	BT127_L	BT127	GSC	0.138706	0	0	0	0	0	0	0.219913	0	0.175217
BTSC_BT127_L_CTGCTGTTCTTGAGGT	-2.88408	17.4962	BT127_L	BT127	GSC	0	0	0	0	0	0	0.198627	0	0	0
BTSC_BT127_L_CTGGTCTAGTGAAGTT	-6.83595	18.9148	BT127_L	BT127	GSC	0	0	0	0	0	0	0.330634	0	0	0
BTSC_BT127_L_CTGGTCTAGTTACCCA	-11.87	9.65246	BT127_L	BT127	GSC	0	0	0	0	0	0	0	0.152778	0	0
BTSC_BT127_L_CTGGTCTCAGGACCCT	-14.9402	7.44811	BT127_L	BT127	GSC	0	0	0	0	0	0	0	0	0	0
BTSC_BT127_L_CTGGTCTTCCGCGTTT	-10.2408	6.45429	BT127_L	BT127	GSC	0	0	0	0	0	0.619334	0	0.432352	0	0
BTSC_BT127_L_CTGTGCTGTGAGCGAT	-1.64245	3.6928	BT127_L	BT127	GSC	0.333037	0	0	0	0.245515	0	0.144669	0	0	0.19935
BTSC_BT127_L_CTGTGCTGTGTGAAAT	-16.792	-12.6413	BT127_L	BT127	GSC	0	0	0	0	0	0	0	0	0	0
BTSC_BT127_L_CTGTGCTTCCCTGACT	-16.3272	0.754438	BT127_L	BT127	GSC	0	0	0	0	0	0	0	0	0	0
BTSC_BT127_L_CTGTTTAAGAACTGTA	-8.45113	18.5501	BT127_L	BT127	GSC	0	0	0	0	0	0.243014	0	0	0	0.471798
BTSC_BT127_L_CTGTTTAAGTAGCGGT	-6.55732	11.2704	BT127_L	BT127	GSC	0	0	0	0	0	0.31414	0.28926	0.18944	0	0.251953
BTSC_BT127_L_CTGTTTACAGGAATGC	-10.568	3.01773	BT127_L	BT127	GSC	0.411083	0	0.626825	0	0	0	0	0	0	0
BTSC_BT127_L_CTGTTTACATGCGCAC	-5.08408	5.57555	BT127_L	BT127	GSC	0	0	0	0	0	0	0	0	0	0
BTSC_BT127_L_CTGTTTAGTAAATGAC	-11.7487	8.33059	BT127_L	BT127	GSC	0	0	0	0	0	0.210516	0	0	0	0
BTSC_BT127_L_CTGTTTAGTTGGACCC	-6.41118	10.9387	BT127_L	BT127	GSC	0	0	0	0	0	0	0	0.214487	0	0
BTSC_BT127_L_CTTAACTAGTTGAGAT	-12.4636	3.76105	BT127_L	BT127	GSC	0	0	0	0	0	0	0	0	0	0
BTSC_BT127_L_CTTAACTCAAACGTGG	-14.8817	2.33789	BT127_L	BT127	GSC	0	0	0	0	0	0	0	0	0	0.579257
BTSC_BT127_L_CTTAACTCAAGGTTTC	-21.4538	8.87482	BT127_L	BT127	GSC	0	0	0	0	0	0	0	0	0	0
BTSC_BT127_L_CTTAACTCATCCGTGG	-16.9169	5.74647	BT127_L	BT127	GSC	0	0	0	0	0.627108	0	0	0	0	0
BTSC_BT127_L_CTTAACTGTGTGACCC	-3.98895	8.74192	BT127_L	BT127	GSC	0.148081	0	0	0	0	0	0	0	0	0
BTSC_BT127_L_CTTACCGAGGTAGCTG	-5.35394	14.1952	BT127_L	BT127	GSC	0	0	0	0	0.300584	0.305842	0	0.428763	0.275586	0
BTSC_BT127_L_CTTACCGGTGACCAAG	-6.19666	9.90993	BT127_L	BT127	GSC	0.23439	0	0	0	0	0	0.214871	0.222624	0	0
BTSC_BT127_L_CTTAGGAAGAGCCCAA	-8.34488	7.33002	BT127_L	BT127	GSC	0	0	0	0	0	0.369765	0.222268	0	0	0
BTSC_BT127_L_CTTAGGAGTAAGGATT	-8.17819	14.1556	BT127_L	BT127	GSC	0	0	0	0	0	0	0.384504	0.460176	0	0.270526
BTSC_BT127_L_CTTCTCTGTCTCGTTC	-15.4196	11.0493	BT127_L	BT127	GSC	0	0	0	0	0	0	0.35502	0.36783	0	0
BTSC_BT127_L_CTTGGCTAGCCACGTC	-17.8688	-10.5023	BT127_L	BT127	GSC	0	0	0	0	0	0	0	0	0	0
BTSC_BT127_L_CTTGGCTCACGTGAGA	-7.57624	15.9261	BT127_L	BT127	GSC	0	0	0	0	0	0	0	0.48322	0	0
BTSC_BT127_L_CTTGGCTGTTCATGGT	-13.0688	10.8374	BT127_L	BT127	GSC	0	0	0	0	0	0.233169	0.214702	0.342763	0	0
BTSC_BT127_L_CTTGGCTTCTAACTGG	-0.00853924	8.74873	BT127_L	BT127	GSC	0.147172	0	0	0	0	0.242594	0	0.139784	0.209922	0
BTSC_BT127_L_CTTTGCGAGAGCAATT	-21.1154	-6.23413	BT127_L	BT127	GSC	0	0	0	0	0	0	0	0.695072	0	0
BTSC_BT127_L_CTTTGCGAGGGATACC	-3.25167	11.9894	BT127_L	BT127	GSC	0	0	0	0	0	0	0	0	0	0
BTSC_BT127_L_CTTTGCGTCCCTAATT	-19.2229	12.5147	BT127_L	BT127	GSC	0.317704	0	0	0	0	0.316297	0	0	0	0
BTSC_BT127_L_GAAACTCAGTACATGA	-7.76529	-0.995668	BT127_L	BT127	GSC	0.313336	0	0	0	0	0	0.181327	0.187869	0.165116	0.249864
BTSC_BT127_L_GAAACTCGTTCACCTC	2.77524	16.4325	BT127_L	BT127	GSC	0.316081	0	0	0	0	0.314681	0	0.189829	0	0.25247
BTSC_BT127_L_GAAACTCTCATCTGCC	-8.81832	15.0938	BT127_L	BT127	GSC	0	0	0	0	0	0	0	0	0	0
BTSC_BT127_L_GAAACTCTCCGTAGGC	-15.0428	14.1727	BT127_L	BT127	GSC	0	0	0.139653	0	0	0.301432	0.0839598	0.423686	0	0.426705
BTSC_BT127_L_GAAATGAAGCCGTCGT	-9.95594	11.7907	BT127_L	BT127	GSC	0.392319	0	0	0	0	0.257891	0	0	0	0
BTSC_BT127_L_GAAATGACACGAGGTA	-19.7934	-6.25756	BT127_L	BT127	GSC	0	0	0	0	0	0	0	0	0	0
BTSC_BT127_L_GAAATGATCAAGGCTT	-5.3981	9.25837	BT127_L	BT127	GSC	0	0	0	0	0	0	0.2791	0	0	0
BTSC_BT127_L_GAACATCCAAGCCGCT	-1.19383	12.8741	BT127_L	BT127	GSC	0.168454	0	0	0	0	0.312983	0.0884829	0.214481	0	0.121927
BTSC_BT127_L_GAACATCGTAGCTAAA	0.849911	11.4621	BT127_L	BT127	GSC	0.174394	0	0.265919	0	0	0	0	0	0	0
BTSC_BT127_L_GAACATCTCGTCACGG	-6.60598	-8.78723	BT127_L	BT127	GSC	0	0	0	0	0	0	0	0.466435	0	0
BTSC_BT127_L_GAACCTAGTGCCTGCA	-11.0289	0.890241	BT127_L	BT127	GSC	0	0	0	0	0	0	0	0	0	0
BTSC_BT127_L_GAACCTATCGAGCCCA	-11.335	8.29751	BT127_L	BT127	GSC	0	0	0	0	0	0	0	0	0.547795	0
BTSC_BT127_L_GAACGGAAGACCGGAT	-11.9705	8.66932	BT127_L	BT127	GSC	0	0	0	0	0	0	0.404909	0	0	0
BTSC_BT127_L_GAACGGAAGCTGCCCA	-3.00308	5.75098	BT127_L	BT127	GSC	0.364955	0	0	0	0	0	0	0.225476	0	0.46102
BTSC_BT127_L_GAACGGACAACTGGCC	-17.3357	2.02335	BT127_L	BT127	GSC	0	0	0	0	0	0	0.400748	0	0	0
BTSC_BT127_L_GAACGGACACTTACGA	-13.1424	8.61582	BT127_L	BT127	GSC	0	0	0	0	0	0	0	0	0	0
BTSC_BT127_L_GAACGGAGTTGCTCCT	-5.02992	11.9	BT127_L	BT127	GSC	0	0	0	0	0	0	0.192868	0.199828	0.300093	0
BTSC_BT127_L_GAAGCAGAGATATACG	-5.35283	13.4041	BT127_L	BT127	GSC	0	0	0	0.17729	0.162742	0.104143	0.165849	0.351026	0.149208	0
BTSC_BT127_L_GAAGCAGAGCTGCCCA	-15.8438	-5.31895	BT127_L	BT127	GSC	0	0	0	0	0	0	0	0	0	0
BTSC_BT127_L_GAAGCAGTCTCTGTCG	-0.770522	8.69245	BT127_L	BT127	GSC	0.290047	0	0	0	0	0	0	0.171438	0	0.228011
BTSC_BT127_L_GAATAAGCACCTTGTC	-14.1392	6.09945	BT127_L	BT127	GSC	0	0	0	0	0	0	0	0.216079	0	0.287382
BTSC_BT127_L_GAATAAGGTACATCCA	-4.63059	7.11216	BT127_L	BT127	GSC	0	0	0	0	0	0.15831	0.145773	0	0	0
BTSC_BT127_L_GAATAAGGTATGGTTC	-20.265	7.7518	BT127_L	BT127	GSC	0	0	0	0	0	0	0.32574	0	0	0
BTSC_BT127_L_GACACGCAGCTAACAA	-7.70719	13.2485	BT127_L	BT127	GSC	0	0	0	0	0	0	0	0.44156	0	0
BTSC_BT127_L_GACACGCCAAGCCTAT	-5.39095	14.5403	BT127_L	BT127	GSC	0.172734	0	0.263387	0	0	0.171969	0	0	0	0
BTSC_BT127_L_GACACGCTCCAAACTG	-17.4096	-3.76735	BT127_L	BT127	GSC	0	0	0	0	0	0	0	0	0	0
BTSC_BT127_L_GACACGCTCTTGTATC	-4.9871	14.992	BT127_L	BT127	GSC	0	0	0	0	0	0	0.180134	0	0	0.393622
BTSC_BT127_L_GACAGAGAGTCTCCTC	-8.2889	12.3896	BT127_L	BT127	GSC	0	0	0	0	0.28336	0.36982	0.267934	0.459829	0	0
BTSC_BT127_L_GACCAATGTAAGCACG	-20.2721	7.33688	BT127_L	BT127	GSC	0	0	0	0	0	0	0	0	0	0.521168
BTSC_BT127_L_GACCAATGTCATGCCG	-1.98951	17.1575	BT127_L	BT127	GSC	0	0	0.44684	0	0	0	0	0	0	0
BTSC_BT127_L_GACCAATTCCACGCAG	-14.7923	3.60118	BT127_L	BT127	GSC	0	0	0	0	0	0	0.546443	0	0	0
BTSC_BT127_L_GACCTGGCAGCATACT	-11.311	5.6653	BT127_L	BT127	GSC	0.14532	0	0	0	0	0	0	0.138025	0	0
BTSC_BT127_L_GACCTGGGTTAAGACA	-4.81395	10.1933	BT127_L	BT127	GSC	0.16955	0	0	0	0	0.168799	0	0	0	0.21418
BTSC_BT127_L_GACGCGTAGAAGGACA	-14.9333	11.6144	BT127_L	BT127	GSC	0	0	0	0	0	0	0.284808	0.295085	0	0
BTSC_BT127_L_GACGCGTCACGAAACG	-9.62491	18.0396	BT127_L	BT127	GSC	0.169156	0	0	0	0	0	0	0	0	0.213681
BTSC_BT127_L_GACGCGTGTACGACCC	-12.2285	11.0489	BT127_L	BT127	GSC	0	0	0	0	0	0.23993	0.220928	0	0.343753	0
BTSC_BT127_L_GACGCGTTCCACGCAG	-18.141	1.22797	BT127_L	BT127	GSC	0	0	0	0	0	0	0	0.344059	0	0
BTSC_BT127_L_GACGGCTAGGCAGTCA	-13.8363	6.11202	BT127_L	BT127	GSC	0	0	0	0	0	0	0	0	0	0
BTSC_BT127_L_GACGTGCAGATATACG	-8.80586	8.69386	BT127_L	BT127	GSC	0	0	0	0	0	0	0	0.32863	0	0
BTSC_BT127_L_GACGTGCCAAGTCATC	-17.0903	-0.897747	BT127_L	BT127	GSC	0	0	0	0	0	0	0	0	0	0
BTSC_BT127_L_GACGTGCCACCATGTA	-11.5312	7.42288	BT127_L	BT127	GSC	0.331923	0	0.158891	0	0	0.179499	0.0955255	0.0989724	0	0
BTSC_BT127_L_GACGTGCCAGCGTAAG	-12.9721	18.63	BT127_L	BT127	GSC	0.134533	0	0	0	0	0.133937	0.123329	0.332114	0	0.284848
BTSC_BT127_L_GACGTTAAGGCTAGCA	-8.86949	5.94924	BT127_L	BT127	GSC	0	0	0	0	0	0	0	0	0	0.381098
BTSC_BT127_L_GACGTTACATCGACGC	-8.82233	12.4388	BT127_L	BT127	GSC	0	0	0	0	0	0.210435	0	0	0	0.267009
BTSC_BT127_L_GACGTTAGTACCCAAT	-3.36839	17.5405	BT127_L	BT127	GSC	0	0	0	0	0	0.462391	0	0	0	0
BTSC_BT127_L_GACGTTAGTCCGACGT	-9.76176	2.77775	BT127_L	BT127	GSC	0	0	0	0	0	0	0	0	0	0
BTSC_BT127_L_GACGTTAGTTGTCTTT	-14.4115	1.37988	BT127_L	BT127	GSC	0	0	0	0	0	0	0	0.446265	0	0
BTSC_BT127_L_GACGTTATCGTGTAGT	-10.9392	13.1573	BT127_L	BT127	GSC	0	0	0	0	0	0.205999	0.189684	0.44947	0	0
BTSC_BT127_L_GACTAACCAATGACCT	-13.4654	8.57396	BT127_L	BT127	GSC	0	0	0	0	0	0	0	0	0.600846	0
BTSC_BT127_L_GACTAACCATCACGTA	-4.99094	9.97091	BT127_L	BT127	GSC	0	0	0	0	0	0	0	0.285761	0	0
BTSC_BT127_L_GACTAACTCGTCACGG	-14.5437	11.5129	BT127_L	BT127	GSC	0	0	0	0	0	0	0	0	0	0.244947
BTSC_BT127_L_GACTACAAGGCCATAG	-12.1874	6.97186	BT127_L	BT127	GSC	0	0	0	0	0	0	0	0	0	0
BTSC_BT127_L_GACTACAGTTCGCTAA	-1.7199	12.3429	BT127_L	BT127	GSC	0	0	0	0	0	0	0	0	0	0
BTSC_BT127_L_GACTGCGTCATGCAAC	-13.5364	3.0881	BT127_L	BT127	GSC	0	0	0	0	0	0.12626	0	0.203469	0	0.270611
BTSC_BT127_L_GACTGCGTCTTGTATC	-8.32703	6.69771	BT127_L	BT127	GSC	0	0	0	0	0	0.456796	0.420619	0	0	0
BTSC_BT127_L_GAGCAGAAGGTGGGTT	-11.5754	-1.79893	BT127_L	BT127	GSC	0	0	0	0	0	0	0	0	0	0
BTSC_BT127_L_GAGCAGAGTCTTGATG	-5.24754	21.2898	BT127_L	BT127	GSC	0	0	0	0	0	0	0.2963	0	0	0
BTSC_BT127_L_GAGGTGACAGTATGCT	-18.7771	-4.20856	BT127_L	BT127	GSC	0	0	0	0	0	0	0	0	0	0
BTSC_BT127_L_GAGGTGACATACCATG	-7.70466	7.8747	BT127_L	BT127	GSC	0	0	0	0	0	0.140532	0	0.223266	0	0
BTSC_BT127_L_GAGTCCGAGGACCACA	-7.11696	8.65559	BT127_L	BT127	GSC	0	0	0	0	0	0	0	0	0	0
BTSC_BT127_L_GAGTCCGGTCATATGC	-1.82896	10.4086	BT127_L	BT127	GSC	0	0	0	0	0	0.177568	0	0.169405	0	0
BTSC_BT127_L_GAGTCCGGTGGTGTAG	-0.935003	6.79411	BT127_L	BT127	GSC	0.174604	0	0	0	0	0.280747	0.160064	0	0	0
BTSC_BT127_L_GAGTCCGGTGTTTGGT	-10.6057	8.30195	BT127_L	BT127	GSC	0	0	0.254426	0	0	0	0	0	0	0.342737
BTSC_BT127_L_GATCAGTAGAGTACCG	-13.0364	12.462	BT127_L	BT127	GSC	0	0	0.259393	0	0.264656	0.2746	0	0	0	0.348425
BTSC_BT127_L_GATCAGTCAAAGGTGC	-13.641	8.09047	BT127_L	BT127	GSC	0	0	0	0	0	0	0.408312	0	0	0
BTSC_BT127_L_GATCAGTGTATGAAAC	-8.89976	13.8855	BT127_L	BT127	GSC	0	0	0	0	0	0.314313	0	0.299864	0	0.398815
BTSC_BT127_L_GATCAGTGTCCAGTAT	-8.73893	14.7281	BT127_L	BT127	GSC	0	0	0	0	0	0.34726	0	0	0	0
BTSC_BT127_L_GATCAGTGTCCGAACC	-11.4235	16.9276	BT127_L	BT127	GSC	0	0	0	0	0	0	0	0	0	0
BTSC_BT127_L_GATCAGTGTTCAACCA	-11.727	10.7751	BT127_L	BT127	GSC	0	0	0	0	0	0	0	0	0	0
BTSC_BT127_L_GATCGATAGGGTTCCC	0.761868	14.7777	BT127_L	BT127	GSC	0	0	0	0	0	0.157004	0	0.24558	0	0.199214
BTSC_BT127_L_GATCGATCATGCCTTC	-19.0719	7.63404	BT127_L	BT127	GSC	0	0	0	0	0	0	0	0	0	0
BTSC_BT127_L_GATCGATGTTGGACCC	-9.98571	7.73976	BT127_L	BT127	GSC	0	0	0	0	0	0.199414	0	0.190246	0	0
BTSC_BT127_L_GATCGCGCATAGAAAC	-11.3794	10.5128	BT127_L	BT127	GSC	0	0	0	0	0	0	0.210885	0.218494	0	0
BTSC_BT127_L_GATCGTAGTAAATACG	-1.92033	13.961	BT127_L	BT127	GSC	0.243518	0	0	0	0	0	0.223239	0	0	0.307618
BTSC_BT127_L_GATCTAGAGACAGGCT	-10.4254	8.86024	BT127_L	BT127	GSC	0	0	0	0	0	0	0	0.338842	0	0
BTSC_BT127_L_GATCTAGGTCGCCATG	-5.80061	12.3894	BT127_L	BT127	GSC	0	0	0	0	0	0.228867	0.32574	0.218345	0	0.290397
BTSC_BT127_L_GATGAAAAGACGCTTT	-2.39207	13.5802	BT127_L	BT127	GSC	0.190559	0	0	0	0	0	0	0.180994	0	0.240719
BTSC_BT127_L_GATGAAAAGAGACTAT	-7.87025	11.1216	BT127_L	BT127	GSC	0	0	0.332483	0	0	0	0	0	0	0.429505
BTSC_BT127_L_GATGAAAAGGGCATGT	-7.50801	14.062	BT127_L	BT127	GSC	0.158108	0	0	0	0	0.33204	0.305743	0.246119	0	0.327335
BTSC_BT127_L_GATGAAATCCATGAGT	-9.26753	18.9482	BT127_L	BT127	GSC	0	0	0	0	0.34307	0	0.202153	0.209447	0	0.278562
BTSC_BT127_L_GATGAGGCACATGACT	-7.62439	12.2126	BT127_L	BT127	GSC	0	0	0	0	0	0.423663	0.262082	0	0	0.224159
BTSC_BT127_L_GATGAGGCACCTGGTG	-7.03913	5.77297	BT127_L	BT127	GSC	0	0	0	0	0	0	0.275378	0	0	0
BTSC_BT127_L_GATGAGGGTAAGTTCC	-13.7076	14.9076	BT127_L	BT127	GSC	0	0	0.2145	0	0.218853	0.14005	0.128958	0.563019	0	0.177702
BTSC_BT127_L_GATGAGGTCTAAGCCA	-16.1493	13.1962	BT127_L	BT127	GSC	0.390369	0	0	0	0	0	0.35786	0	0	0
BTSC_BT127_L_GATGAGGTCTTACCGC	-13.0082	2.51959	BT127_L	BT127	GSC	0	0	0	0	0	0	0	0	0	0
BTSC_BT127_L_GATGCTAAGGCTATCT	-9.36739	10.9172	BT127_L	BT127	GSC	0	0	0	0	0	0	0	0.262471	0	0.349084
BTSC_BT127_L_GATGCTACATAGACTC	-7.96138	8.72331	BT127_L	BT127	GSC	0	0	0	0	0	0.401854	0.126871	0.131449	0	0.174826
BTSC_BT127_L_GATGCTAGTATCGCAT	-12.3973	4.69278	BT127_L	BT127	GSC	0.165133	0	0	0	0	0.452045	0	0.384333	0	0
BTSC_BT127_L_GATGCTAGTCGACTAT	-17.9343	-0.34126	BT127_L	BT127	GSC	0	0	0.153003	0	0	0.0998977	0	0	0.143125	0.408249
BTSC_BT127_L_GATGCTATCATGTAGC	-5.31281	-5.84965	BT127_L	BT127	GSC	0	0	0	0	0	0	0	0	0	0
BTSC_BT127_L_GATGCTATCATGTCTT	-20.4821	-7.63299	BT127_L	BT127	GSC	0	0	0	0	0	0	0	0	0	0
BTSC_BT127_L_GATGCTATCGGTGTTA	6.62672	9.48391	BT127_L	BT127	GSC	0	0	0	0	0	0	0	0	0	0
BTSC_BT127_L_GATTCAGAGTATCGAA	-10.4852	-1.14003	BT127_L	BT127	GSC	0	0	0	0	0	0	0.614997	0	0	0
BTSC_BT127_L_GATTCAGAGTCCATAC	-14.2063	-13.7027	BT127_L	BT127	GSC	0	0	0	0	0	0	0	0	0	0
BTSC_BT127_L_GATTCAGGTTCGCGAC	-17.6842	9.07035	BT127_L	BT127	GSC	0	0	0	0	0	0	0.327978	0	0	0
BTSC_BT127_L_GATTCAGGTTCGGGCT	4.32132	13.2262	BT127_L	BT127	GSC	0	0	0	0	0	0	0	0	0	0.2446
BTSC_BT127_L_GATTCAGTCAGATAAG	-11.5387	7.61654	BT127_L	BT127	GSC	0	0	0	0	0	0	0	0	0	0
BTSC_BT127_L_GCAAACTAGTGGTAGC	-13.8479	-2.45461	BT127_L	BT127	GSC	0	0	0	0	0	0	0	0	0	0
BTSC_BT127_L_GCAAACTCACAGTCGC	0.0676157	23.4388	BT127_L	BT127	GSC	0	0	0	0	0	0.175353	0	0.269829	0	0.222496
BTSC_BT127_L_GCAAACTCAGAGTGTG	-2.47298	17.1508	BT127_L	BT127	GSC	0	0	0	0	0.234031	0.149763	0	0.235837	0	0
BTSC_BT127_L_GCAAACTGTAGGACAC	-14.908	14.5764	BT127_L	BT127	GSC	0	0	0	0	0	0	0.2551	0	0	0
BTSC_BT127_L_GCAAACTGTGGTGTAG	-9.52022	10.8445	BT127_L	BT127	GSC	0	0	0	0	0	0	0	0.203421	0	0
BTSC_BT127_L_GCAAACTTCAGTACGT	-10.6249	12.2768	BT127_L	BT127	GSC	0	0	0	0	0	0	0	0	0	0
BTSC_BT127_L_GCAATCAAGCCAGTTT	-14.5569	-11.5188	BT127_L	BT127	GSC	0	0	0	0	0	0	0	0	0	0
BTSC_BT127_L_GCAATCACACAGGAGT	-15.4796	4.89929	BT127_L	BT127	GSC	0	0	0	0	0	0.411665	0	0	0	0
BTSC_BT127_L_GCAATCAGTTCAACCA	-12.2425	3.98926	BT127_L	BT127	GSC	0	0	0	0	0	0	0	0	0	0
BTSC_BT127_L_GCACATACACCTCGGA	-13.4106	5.64609	BT127_L	BT127	GSC	0	0	0	0	0	0	0	0	0	0
BTSC_BT127_L_GCACATACATCCGTGG	-1.88196	11.8537	BT127_L	BT127	GSC	0	0	0.311042	0	0	0	0.186999	0.384182	0.290961	0.257681
BTSC_BT127_L_GCACATAGTACGAAAT	-2.51557	16.678	BT127_L	BT127	GSC	0	0	0	0	0	0	0.174702	0.424713	0	0
BTSC_BT127_L_GCACATATCCACTCCA	-7.15665	8.84321	BT127_L	BT127	GSC	0	0	0	0	0	0.136813	0	0.21815	0	0
BTSC_BT127_L_GCACTCTAGCTACCGC	-6.11833	8.84154	BT127_L	BT127	GSC	0	0	0.222784	0	0	0	0.133938	0	0	0.305893
BTSC_BT127_L_GCACTCTCACAGAGGT	-13.8902	13.8934	BT127_L	BT127	GSC	0	0	0	0	0	0	0.262368	0.271835	0	0
BTSC_BT127_L_GCACTCTCACGTTGGC	-11.4255	2.75441	BT127_L	BT127	GSC	0	0	0	0	0	0	0	0.605174	0	0
BTSC_BT127_L_GCAGCCAAGAGGTTGC	-11.4171	10.6743	BT127_L	BT127	GSC	0	0	0	0	0	0.291616	0.167402	0.173442	0	0
BTSC_BT127_L_GCAGCCAGTCTTCTCG	-4.45025	17.0632	BT127_L	BT127	GSC	0	0	0	0	0	0	0.276499	0.512342	0	0
BTSC_BT127_L_GCAGCCATCACAGGCC	-11.7514	7.07449	BT127_L	BT127	GSC	0	0	0	0	0	0	0	0	0	0
BTSC_BT127_L_GCAGTTATCAGTTAGC	-3.34021	10.4331	BT127_L	BT127	GSC	0.150764	0	0	0	0	0.150096	0	0	0	0
BTSC_BT127_L_GCAGTTATCGAATGGG	-17.0468	11.4394	BT127_L	BT127	GSC	0	0	0	0	0	0	0	0	0	0
BTSC_BT127_L_GCATACAAGTCAATAG	-8.0189	11.939	BT127_L	BT127	GSC	0	0	0	0	0	0.116482	0.18303	0.189634	0.284785	0
BTSC_BT127_L_GCATACACATTAACCG	-12.9471	8.90123	BT127_L	BT127	GSC	0	0	0.3354	0	0	0	0	0	0	0
BTSC_BT127_L_GCATACATCAACACGT	-10.048	8.18608	BT127_L	BT127	GSC	0	0	0	0	0	0	0	0.299532	0	0.703825
BTSC_BT127_L_GCATACATCATGTCCC	-9.81067	3.21594	BT127_L	BT127	GSC	0	0	0	0	0	0	0	0	0	0
BTSC_BT127_L_GCATACATCCACTGGG	-9.93817	3.02684	BT127_L	BT127	GSC	0.206249	0	0.185151	0	0	0	0	0	0.173198	0.153387
BTSC_BT127_L_GCATGATGTATTCGTG	-2.68059	16.3098	BT127_L	BT127	GSC	0	0	0	0	0	0.160531	0.147818	0.321585	0	0.203689
BTSC_BT127_L_GCATGCGAGTACCGGA	-13.5597	-0.954503	BT127_L	BT127	GSC	0	0	0	0	0	0	0	0	0	0
BTSC_BT127_L_GCATGCGGTTTGGGCC	-15.9104	9.52305	BT127_L	BT127	GSC	0	0	0	0	0	0	0.121095	0	0	0.280368
BTSC_BT127_L_GCATGTAAGAGCCCAA	-10.4222	8.47639	BT127_L	BT127	GSC	0	0	0	0	0	0	0	0	0	0
BTSC_BT127_L_GCATGTATCAGAGGTG	-10.434	6.62225	BT127_L	BT127	GSC	0	0	0	0	0	0	0	0	0	0
BTSC_BT127_L_GCATGTATCATCGATG	-19.7938	-0.0960122	BT127_L	BT127	GSC	0	0	0	0	0	0	0	0	0	0
BTSC_BT127_L_GCATGTATCCTTAATC	-18.2207	12.0022	BT127_L	BT127	GSC	0	0	0	0	0	0.283416	0.388748	0.402775	0	0
BTSC_BT127_L_GCCAAATCAGGAACGT	-18.6561	15.207	BT127_L	BT127	GSC	0	0	0	0	0	0	0	0	0	0.400588
BTSC_BT127_L_GCCAAATGTCGGGTCT	-15.5646	5.212	BT127_L	BT127	GSC	0	0	0	0	0	0	0	0	0	0
BTSC_BT127_L_GCCAAATGTGTTTGTG	-11.6956	8.39803	BT127_L	BT127	GSC	0	0	0	0	0	0.270132	0.152971	0	0	0.342755
BTSC_BT127_L_GCCAAATTCACGATGT	2.34946	20.9908	BT127_L	BT127	GSC	0	0	0	0	0	0.165369	0	0.328969	0	0.209828
BTSC_BT127_L_GCCTCTAAGCTAAACA	-7.99272	12.0671	BT127_L	BT127	GSC	0	0	0.2077	0	0	0.13561	0.12487	0.129376	0	0.172068
BTSC_BT127_L_GCCTCTACACGCTTTC	-4.21977	13.5439	BT127_L	BT127	GSC	0	0	0	0	0	0	0	0.388914	0	0
BTSC_BT127_L_GCCTCTACAGGACCCT	-11.3396	1.46864	BT127_L	BT127	GSC	0	0	0	0	0	0	0.590654	0	0	0
BTSC_BT127_L_GCCTCTACAGGCTCAC	-14.4915	9.9297	BT127_L	BT127	GSC	0	0	0	0	0	0	0	0	0	0
BTSC_BT127_L_GCCTCTAGTCGCTTCT	-15.1043	14.2459	BT127_L	BT127	GSC	0	0	0	0	0	0.247559	0.227953	0.360229	0	0
BTSC_BT127_L_GCCTCTATCTAAGCCA	-9.6281	14.376	BT127_L	BT127	GSC	0	0	0	0	0	0	0	0.443205	0	0
BTSC_BT127_L_GCGACCATCGCTTAGA	-22.2317	5.23905	BT127_L	BT127	GSC	0	0	0	0	0	0	0	0.476717	0	0
BTSC_BT127_L_GCGACCATCTACTTAC	-5.65858	9.37024	BT127_L	BT127	GSC	0	0	0	0	0	0	0	0	0	0
BTSC_BT127_L_GCGAGAAAGAGTGAGA	-11.7367	11.1975	BT127_L	BT127	GSC	0	0	0	0	0.290074	0	0.170925	0.177092	0	0
BTSC_BT127_L_GCGAGAACACCCTATC	-10.3478	8.1093	BT127_L	BT127	GSC	0	0	0	0	0	0	0	0.227165	0	0
BTSC_BT127_L_GCGAGAAGTTCGCGAC	-1.67787	13.5966	BT127_L	BT127	GSC	0	0	0.192934	0	0	0	0	0	0.304948	0.159835
BTSC_BT127_L_GCGAGAATCAAACCGT	-17.7204	-8.88032	BT127_L	BT127	GSC	0	0	0	0	0	0.832048	0	0	0	0
BTSC_BT127_L_GCGCAACAGTCGTTTG	-16.7858	6.01009	BT127_L	BT127	GSC	0	0	0	0	0	0	0	0	0	0
BTSC_BT127_L_GCGCAACGTTGAGTTC	-7.08481	11.5287	BT127_L	BT127	GSC	0	0	0	0	0	0.611823	0	0	0	0
BTSC_BT127_L_GCGCAACTCTGACCTC	-19.7774	-9.11408	BT127_L	BT127	GSC	0	0	0	0	0	0	0	0	0	0
BTSC_BT127_L_GCGCAGTGTACTCTCC	-5.49868	7.96058	BT127_L	BT127	GSC	0.202112	0	0	0	0	0	0.18528	0	0	0
BTSC_BT127_L_GCGCAGTGTTATCGGT	-13.7365	-10.1799	BT127_L	BT127	GSC	0	0	0	0	0	0	0	0	0	0
BTSC_BT127_L_GCGCCAAAGACTGGGT	0.419782	4.46489	BT127_L	BT127	GSC	0.225937	0	0	0	0	0.134241	0.123609	0.280026	0	0.170331
BTSC_BT127_L_GCGCCAAAGTACGATA	-1.51047	5.62973	BT127_L	BT127	GSC	0.36591	0	0	0.24287	0	0.237086	0.131366	0.136106	0	0.300825
BTSC_BT127_L_GCGCCAAAGTCCATAC	-19.9477	-9.79468	BT127_L	BT127	GSC	0	0	0	0	0	0	0	0	0	0
BTSC_BT127_L_GCGCCAACAGCTGCTG	-9.4651	9.31635	BT127_L	BT127	GSC	0.153023	0	0	0	0	0	0.230989	0	0.218268	0.193303
BTSC_BT127_L_GCGCCAATCTTGCATT	-16.5432	13.8087	BT127_L	BT127	GSC	0	0	0	0	0.56152	0.359332	0	0.342813	0	0.455937
BTSC_BT127_L_GCGCGATCATCTACGA	-3.45986	13.9545	BT127_L	BT127	GSC	0.136868	0	0	0	0	0	0.273447	0.129998	0	0
BTSC_BT127_L_GCGGGTTCACGGATAG	-9.21353	12.6989	BT127_L	BT127	GSC	0	0	0	0	0	0.14542	0.133903	0	0	0.184516
BTSC_BT127_L_GCGGGTTTCTAACCGA	-11.9494	10.4202	BT127_L	BT127	GSC	0	0	0	0	0	0	0	0	0	0
BTSC_BT127_L_GCGGGTTTCTGCCCTA	-16.0039	3.2831	BT127_L	BT127	GSC	0.429178	0	0	0	0	0	0.393438	0	0	0
BTSC_BT127_L_GCTCCTATCTGTGCAA	-18.1279	1.82385	BT127_L	BT127	GSC	0	0	0	0	0	0	0	0	0	0.457795
BTSC_BT127_L_GCTCTGTGTCTCATCC	-13.7662	7.84999	BT127_L	BT127	GSC	0	0	0	0	0	0.178099	0	0.169911	0	0.22598
BTSC_BT127_L_GCTCTGTGTGCTAGCC	-14.1922	15.8015	BT127_L	BT127	GSC	0	0	0	0.302189	0	0	0	0.272641	0	0.225233
BTSC_BT127_L_GCTCTGTTCAACTCTT	-18.5489	0.993023	BT127_L	BT127	GSC	0	0	0	0	0	0	0	0	0	0
BTSC_BT127_L_GCTCTGTTCAGCTGGC	-20.5034	6.03269	BT127_L	BT127	GSC	0	0	0	0	0	0	0	0	0	0.73609
BTSC_BT127_L_GCTCTGTTCGCTAGCG	7.20614	13.447	BT127_L	BT127	GSC	0.234216	0	0.214338	0	0	0	0.128861	0.13351	0	0
BTSC_BT127_L_GCTCTGTTCTTGCCGT	-11.3808	7.14095	BT127_L	BT127	GSC	0	0	0	0	0	0	0	0	0	0
BTSC_BT127_L_GCTGCAGCATATGAGA	-4.76588	9.93957	BT127_L	BT127	GSC	0.218144	0	0	0	0	0.12892	0.11871	0.207194	0	0
BTSC_BT127_L_GCTGCGAAGGACAGAA	5.24338	11.989	BT127_L	BT127	GSC	0.111896	0	0	0	0	0.1114	0	0.182351	0	0
BTSC_BT127_L_GCTGCGACACCTCGTT	-6.20605	17.466	BT127_L	BT127	GSC	0	0	0.139921	0	0	0.0913563	0	0	0	0.115917
BTSC_BT127_L_GCTGCGATCGCAGGCT	-13.3292	-5.22378	BT127_L	BT127	GSC	0	0	0	0	0	0	0	0	0	0
BTSC_BT127_L_GCTGCTTTCAAACCGT	-13.8291	16.4957	BT127_L	BT127	GSC	0	0	0	0	0	0	0.333144	0.586417	0	0
BTSC_BT127_L_GCTGGGTAGACGACGT	-16.4357	10.3766	BT127_L	BT127	GSC	0	0	0	0	0	0	0	0	0	0
BTSC_BT127_L_GCTGGGTCAGACGCTC	-13.4377	12.5496	BT127_L	BT127	GSC	0	0	0	0	0	0	0	0.374985	0	0.329734
BTSC_BT127_L_GCTGGGTTCTTCGGTC	-16.3662	13.077	BT127_L	BT127	GSC	0	0	0	0	0	0	0	0.188285	0	0.250417
BTSC_BT127_L_GCTTCCACAGGAATCG	-6.64745	11.6998	BT127_L	BT127	GSC	0	0	0	0	0	0.227547	0.324175	0.481046	0	0
BTSC_BT127_L_GCTTCCAGTCTAAACC	-12.5398	8.76893	BT127_L	BT127	GSC	0	0	0	0	0	0.166934	0.249766	0.331342	0	0
BTSC_BT127_L_GCTTGAATCAACGGGA	-5.163	7.22548	BT127_L	BT127	GSC	0	0	0	0	0.178699	0.310164	0.105298	0.109097	0	0.328163
BTSC_BT127_L_GCTTGAATCAACTCTT	-12.3842	8.16435	BT127_L	BT127	GSC	0	0	0	0	0	0	0	0	0	0
BTSC_BT127_L_GGAAAGCAGGATGCGT	-11.4752	11.7401	BT127_L	BT127	GSC	0	0	0	0	0	0	0	0	0	0
BTSC_BT127_L_GGAAAGCTCAGCATGT	-9.51734	12.1575	BT127_L	BT127	GSC	0	0	0	0	0	0.300526	0	0	0	0.239041
BTSC_BT127_L_GGAACTTAGGACACCA	-13.2554	7.1274	BT127_L	BT127	GSC	0	0	0	0	0	0	0	0	0	0
BTSC_BT127_L_GGAACTTCACGAAAGC	-3.59615	15.334	BT127_L	BT127	GSC	0.280009	0	0	0	0	0	0.502379	0.265953	0	0.218736
BTSC_BT127_L_GGAACTTCAGATAATG	-2.56328	13.3595	BT127_L	BT127	GSC	0	0	0	0	0	0	0	0.237328	0	0.315643
BTSC_BT127_L_GGAATAAGTTTGACAC	-21.089	3.91142	BT127_L	BT127	GSC	0	0	0	0	0	0	0	0	0	0
BTSC_BT127_L_GGAATAATCAGGTAAA	-13.6056	1.24649	BT127_L	BT127	GSC	0	0	0	0	0	0.540281	0	0.515443	0	0
BTSC_BT127_L_GGACAAGTCAAGGTAA	-13.5604	8.81928	BT127_L	BT127	GSC	0.24562	0	0	0	0	0.529425	0	0.356575	0	0
BTSC_BT127_L_GGACAAGTCGCCTGTT	-11.7729	2.64047	BT127_L	BT127	GSC	0	0	0	0	0	0	0	0	0	0
BTSC_BT127_L_GGACAAGTCTCGATGA	-11.2244	7.69306	BT127_L	BT127	GSC	0	0	0	0	0	0	0	0.131085	0	0
BTSC_BT127_L_GGACAGAGTCTAGTGT	-11.3501	17.7134	BT127_L	BT127	GSC	0	0	0	0	0	0.156684	0.236613	0.14948	0.224484	0.198807
BTSC_BT127_L_GGACATTCACCATCCT	-6.56236	17.3102	BT127_L	BT127	GSC	0	0	0	0	0	0.396476	0	0	0	0
BTSC_BT127_L_GGACGTCAGTAATCCC	-12.6222	5.26335	BT127_L	BT127	GSC	0	0	0	0	0	0	0	0	0	0
BTSC_BT127_L_GGACGTCGTACCGTTA	-19.3039	-2.03309	BT127_L	BT127	GSC	0	0	0	0	0	0	0	0	0	0
BTSC_BT127_L_GGACGTCTCATAGCAC	-11.3979	6.60438	BT127_L	BT127	GSC	0	0	0	0	0.668061	0	0	0	0	0
BTSC_BT127_L_GGACGTCTCTCCAACC	-12.6372	-8.67975	BT127_L	BT127	GSC	0	0	0	0	0	0	0	0	0	0
BTSC_BT127_L_GGAGCAAAGCCAACAG	-10.7805	7.55036	BT127_L	BT127	GSC	0	0	0	0	0	0	0	0	0	0
BTSC_BT127_L_GGAGCAAGTGAGGGTT	1.34529	7.11365	BT127_L	BT127	GSC	0	0	0	0	0	0.133756	0	0	0.191635	0
BTSC_BT127_L_GGATGTTAGTTCGATC	-1.62886	11.0807	BT127_L	BT127	GSC	0.0794462	0	0.121141	0	0	0.191519	0	0.182714	0.11332	0
BTSC_BT127_L_GGATGTTTCACGCATA	3.43796	20.1382	BT127_L	BT127	GSC	0	0	0	0	0	0.129226	0	0.367074	0.185144	0.163967
BTSC_BT127_L_GGATTACGTTTGTTGG	-11.8419	10.1027	BT127_L	BT127	GSC	0	0	0	0	0	0	0	0	0	0
BTSC_BT127_L_GGCCGATCACTACAGT	7.00896	15.8911	BT127_L	BT127	GSC	0	0	0	0	0	0	0.125078	0.282622	0	0
BTSC_BT127_L_GGCCGATCAGGCTCAC	-18.6328	-1.72279	BT127_L	BT127	GSC	0	0	0	0	0	0	0	0	0	0
BTSC_BT127_L_GGCCGATGTCTTCAAG	-6.27731	7.65932	BT127_L	BT127	GSC	0	0	0	0	0	0	0.220018	0	0	0.393265
BTSC_BT127_L_GGCGACTAGCACGCCT	-18.5626	12.2126	BT127_L	BT127	GSC	0	0	0	0	0	0	0.221426	0	0	0
BTSC_BT127_L_GGCGACTAGCAGATCG	-5.24236	13.2548	BT127_L	BT127	GSC	0	0	0.297718	0.330914	0	0.194384	0	0	0.278497	0
BTSC_BT127_L_GGCGACTAGGCTATCT	-17.1584	0.90769	BT127_L	BT127	GSC	0	0	0	0	0	0	0	0.444706	0	0.591453
BTSC_BT127_L_GGCGACTCACCAGCAC	-10.4655	14.2129	BT127_L	BT127	GSC	0	0	0	0	0	0	0	0.396493	0	0.268808
BTSC_BT127_L_GGCGACTGTGCCTTGG	-15.2882	4.28466	BT127_L	BT127	GSC	0	0	0	0	0	0	0	0	0	0.558695
BTSC_BT127_L_GGCGACTTCCTTTCGG	-5.56089	12.1757	BT127_L	BT127	GSC	0	0	0	0	0	0	0.246045	0.470551	0	0
BTSC_BT127_L_GGCGACTTCGCCTGTT	-4.53201	13.9636	BT127_L	BT127	GSC	0	0	0.253874	0	0	0	0.248265	0	0	0.210321
BTSC_BT127_L_GGCGTGTAGATACACA	-15.7032	2.75514	BT127_L	BT127	GSC	0	0	0	0	0.805967	0	0	0.49205	0	0
BTSC_BT127_L_GGCGTGTCACTATCTT	-13.0083	8.95935	BT127_L	BT127	GSC	0	0	0.183119	0	0	0.267946	0.110092	0	0	0
BTSC_BT127_L_GGCTCGATCGAGCCCA	-6.78597	9.57939	BT127_L	BT127	GSC	0	0	0	0	0	0	0	0.263024	0	0
BTSC_BT127_L_GGCTGGTTCAAGAAGT	-6.44087	14.1398	BT127_L	BT127	GSC	0	0	0	0	0	0	0	0	0	0
BTSC_BT127_L_GGGAATGGTTATGTGC	-10.0643	10.7017	BT127_L	BT127	GSC	0	0	0	0	0	0	0	0	0.48174	0
BTSC_BT127_L_GGGACCTAGATCCTGT	-0.305919	18.6413	BT127_L	BT127	GSC	0	0	0	0	0	0.235862	0	0.587504	0	0
BTSC_BT127_L_GGGAGATAGGGTATCG	-11.5035	-4.75301	BT127_L	BT127	GSC	0	0	0	0	0	0	0	0	0	0
BTSC_BT127_L_GGGAGATAGTTTCCTT	-7.84607	13.1702	BT127_L	BT127	GSC	0	0	0	0	0	0	0	0.438732	0	0
BTSC_BT127_L_GGGAGATTCAAGCCTA	-6.68204	9.1796	BT127_L	BT127	GSC	0	0	0	0	0	0	0	0	0	0
BTSC_BT127_L_GGGATGAAGAAGGTGA	-14.164	6.34585	BT127_L	BT127	GSC	0.168116	0	0.256345	0	0	0.167371	0	0.259354	0	0
BTSC_BT127_L_GGGATGATCAACCATG	-14.2181	6.7354	BT127_L	BT127	GSC	0	0	0	0	0	0	0	0	0	0
BTSC_BT127_L_GGGATGATCCGAACGC	-6.67584	14.6863	BT127_L	BT127	GSC	0	0	0	0	0	0	0.185735	0.192436	0	0.255938
BTSC_BT127_L_GGGCATCGTCTGCGGT	-16.3519	-4.79582	BT127_L	BT127	GSC	0	0	0	0	0	0	0	0	0	0
BTSC_BT127_L_GGGCATCGTGACCAAG	-7.12363	7.36129	BT127_L	BT127	GSC	0	0	0	0	0	0	0.165598	0	0	0
BTSC_BT127_L_GGGTCTGAGGTGTTAA	-10.911	6.97005	BT127_L	BT127	GSC	0	0	0	0	0	0	0	0	0	0
BTSC_BT127_L_GGGTCTGCATTAGCCA	-16.3619	12.4895	BT127_L	BT127	GSC	0	0	0	0	0	0.483238	0	0	0.692344	0
BTSC_BT127_L_GGGTCTGGTACTTAGC	2.27971	8.27946	BT127_L	BT127	GSC	0	0	0	0	0	0.263569	0	0.379389	0	0
BTSC_BT127_L_GGGTCTGTCATCACCC	-10.8336	11.6268	BT127_L	BT127	GSC	0	0	0	0	0	0.216351	0.310815	0	0	0.428296
BTSC_BT127_L_GGGTTGCCAAAGCAAT	-19.0178	-7.94375	BT127_L	BT127	GSC	0	0	0	0	0	0	0	0	0	0
BTSC_BT127_L_GGGTTGCCAGGGAGAG	-3.52102	10.1809	BT127_L	BT127	GSC	0	0	0	0	0	0.504122	0	0.185408	0	0
BTSC_BT127_L_GGGTTGCGTAGAGTGC	-16.8954	15.2721	BT127_L	BT127	GSC	0	0	0	0	0	0	0	0.247801	0	0
BTSC_BT127_L_GGGTTGCGTAGCAAAT	-11.1348	2.16408	BT127_L	BT127	GSC	0	0	0	0	0	0	0	0	0	0
BTSC_BT127_L_GGGTTGCGTATAAACG	-3.14833	15.6975	BT127_L	BT127	GSC	0	0	0	0	0	0.402222	0	0.658916	0	0.257277
BTSC_BT127_L_GGGTTGCTCCTACAGA	-14.1478	13.6023	BT127_L	BT127	GSC	0	0	0	0	0	0	0	0	0	0
BTSC_BT127_L_GGTATTGAGTGGAGTC	-15.2451	-0.0326697	BT127_L	BT127	GSC	0	0	0	0	0.75629	0	0.445641	0	0	0
BTSC_BT127_L_GGTGAAGAGCAGATCG	-12.6704	9.6824	BT127_L	BT127	GSC	0	0	0	0	0	0	0.281252	0	0	0
BTSC_BT127_L_GGTGAAGCAGCTCCGA	-9.8695	6.63301	BT127_L	BT127	GSC	0	0	0	0	0.286879	0	0	0	0	0
BTSC_BT127_L_GGTGAAGCATACTACG	-12.7961	12.6907	BT127_L	BT127	GSC	0	0	0	0	0	0	0	0	0	0.449565
BTSC_BT127_L_GGTGAAGGTAAACCTC	-16.1881	-9.13694	BT127_L	BT127	GSC	0	0	0	0	0	0	0	0	0	0
BTSC_BT127_L_GGTGAAGTCGGTCCGA	-5.79539	9.23277	BT127_L	BT127	GSC	0	0	0	0	0	0.17811	0	0.273422	0	0.225994
BTSC_BT127_L_GGTGCGTAGCTCCTTC	4.27901	17.3905	BT127_L	BT127	GSC	0	0	0	0	0	0.116356	0.107141	0.487688	0	0.251972
BTSC_BT127_L_GGTGCGTAGTTCGATC	-4.89069	8.77762	BT127_L	BT127	GSC	0	0	0.482054	0	0	0	0.423666	0	0	0
BTSC_BT127_L_GGTGCGTGTCCAACTA	-15.5871	8.08802	BT127_L	BT127	GSC	0	0	0	0	0	0.268024	0.151571	0.255702	0	0.208862
BTSC_BT127_L_GGTGCGTTCGGTTAAC	-12.5215	16.0227	BT127_L	BT127	GSC	0	0	0	0	0.255852	0	0.24567	0.1562	0	0.338528
BTSC_BT127_L_GGTGTTAGTACCGAGA	-10.3222	9.13842	BT127_L	BT127	GSC	0	0	0	0	0	0	0.392582	0	0	0
BTSC_BT127_L_GGTGTTAGTATAGGGC	-12.0704	0.388728	BT127_L	BT127	GSC	0	0	0	0	0	0	0	0	0	0
BTSC_BT127_L_GGTGTTAGTCAATACC	0.23884	19.1234	BT127_L	BT127	GSC	0.220211	0	0	0	0	0	0	0	0	0
BTSC_BT127_L_GGTGTTAGTCCGAGTC	-11.3999	6.87058	BT127_L	BT127	GSC	0	0	0	0	0	0	0	0	0	0
BTSC_BT127_L_GGTGTTATCATAGCAC	-11.1028	5.9597	BT127_L	BT127	GSC	0	0	0	0	0	0	0	0	0	0
BTSC_BT127_L_GTAACTGTCTTTAGGG	-13.7419	7.6307	BT127_L	BT127	GSC	0	0	0	0	0	0	0	0	0	0
BTSC_BT127_L_GTACGTACATCGATGT	2.26092	15.4321	BT127_L	BT127	GSC	0.332579	0	0	0	0	0.125002	0.115102	0.201702	0.179093	0
BTSC_BT127_L_GTACGTATCATAAAGG	-7.43493	10.4926	BT127_L	BT127	GSC	0	0	0	0	0	0	0	0.319633	0.480012	0.425108
BTSC_BT127_L_GTACGTATCTCGAGTA	-19.079	17.2519	BT127_L	BT127	GSC	0	0	0.409816	0	0	0	0	0.255273	0	0
BTSC_BT127_L_GTACTCCCATGAAGTA	-16.1216	-2.01785	BT127_L	BT127	GSC	0	0	0	0	0	0	0	0	0	0
BTSC_BT127_L_GTACTCCTCCGGCACA	-13.6816	-5.69809	BT127_L	BT127	GSC	0	0	0	0	0	0	0	0	0	0
BTSC_BT127_L_GTACTTTAGCGTGTCC	-4.92148	8.33227	BT127_L	BT127	GSC	0	0	0	0	0	0	0	0	0	0
BTSC_BT127_L_GTACTTTAGTCGCCGT	-18.8746	10.6702	BT127_L	BT127	GSC	0	0	0	0	0	0	0.221907	0	0	0
BTSC_BT127_L_GTAGGCCCATACTACG	-13.8977	-3.74232	BT127_L	BT127	GSC	0	0	0	0	0	0	0	0.577261	0	0
BTSC_BT127_L_GTAGGCCGTGTCAATC	-3.4612	15.4941	BT127_L	BT127	GSC	0.124541	0	0	0	0	0.374042	0.253926	0.200277	0	0.417636
BTSC_BT127_L_GTAGGCCTCGTCCAGG	-3.1457	10.8281	BT127_L	BT127	GSC	0	0	0.191918	0	0	0	0.115382	0	0	0.268829
BTSC_BT127_L_GTATCTTAGCCATCGC	-8.14536	9.43933	BT127_L	BT127	GSC	0	0	0	0	0	0	0.144447	0.149659	0	0.199044
BTSC_BT127_L_GTATCTTCATTCTCAT	-9.40867	8.77786	BT127_L	BT127	GSC	0	0	0	0	0	0.212887	0.196027	0	0	0
BTSC_BT127_L_GTATCTTGTTAGGGTG	-7.93985	5.17828	BT127_L	BT127	GSC	0	0	0	0	0	0	0	0	0	0
BTSC_BT127_L_GTATTCTCATTGGTAC	-16.0999	4.15668	BT127_L	BT127	GSC	0	0	0	0	0	0	0	0	0	0
BTSC_BT127_L_GTATTCTTCACTTCAT	-14.876	5.98088	BT127_L	BT127	GSC	0	0	0.522527	0	0	0	0	0	0	0
BTSC_BT127_L_GTCAAGTTCCCTAATT	-10.4341	0.0467336	BT127_L	BT127	GSC	0	0	0	0	0	0	0	0	0	0
BTSC_BT127_L_GTCACAAAGAATGTGT	-5.11535	13.2179	BT127_L	BT127	GSC	0	0	0	0	0	0	0	0.311949	0	0
BTSC_BT127_L_GTCACAAAGGACAGAA	-7.6642	11.1437	BT127_L	BT127	GSC	0.331689	0	0	0	0	0	0	0	0	0
BTSC_BT127_L_GTCACAAAGGGCTCTC	-0.151536	19.2269	BT127_L	BT127	GSC	0	0	0	0	0	0	0.172638	0	0	0.237891
BTSC_BT127_L_GTCACAAGTCTGCAAT	-14.5055	0.985799	BT127_L	BT127	GSC	0	0	0	0	0	0	0	0	0.845701	0
BTSC_BT127_L_GTCACAATCCCGGATG	-6.88893	9.44581	BT127_L	BT127	GSC	0	0	0	0	0	0.191622	0	0.290848	0	0.386825
BTSC_BT127_L_GTCACGGGTTATCCGA	-0.0449345	13.2718	BT127_L	BT127	GSC	0.209675	0	0	0	0	0.208746	0	0	0	0
BTSC_BT127_L_GTCATTTAGGACACCA	-13.2437	14.6926	BT127_L	BT127	GSC	0.203895	0	0	0	0	0.202992	0.294662	0	0	0
BTSC_BT127_L_GTCATTTTCAGCACAT	-11.1845	10.6529	BT127_L	BT127	GSC	0	0	0	0	0	0	0	0	0	0
BTSC_BT127_L_GTCATTTTCGTGGACC	-15.4676	9.80514	BT127_L	BT127	GSC	0	0	0	0	0	0	0	0	0	0
BTSC_BT127_L_GTCATTTTCTGTCAAG	-2.19082	17.8986	BT127_L	BT127	GSC	0.184398	0	0	0	0	0.294031	0.169042	0.280514	0	0.232936
BTSC_BT127_L_GTCCTCAAGTATTGGA	-12.3243	10.3395	BT127_L	BT127	GSC	0	0	0	0	0	0.42829	0	0	0	0
BTSC_BT127_L_GTCCTCACAGTAGAGC	-19.0485	-6.86149	BT127_L	BT127	GSC	0	0	0	0	0	0	0	0	0	1
BTSC_BT127_L_GTCCTCAGTTGTCTTT	-11.3913	9.55862	BT127_L	BT127	GSC	0	0	0	0	0.577649	0	0	0	0	0
BTSC_BT127_L_GTCCTCATCGGTGTCG	-10.1081	11.4793	BT127_L	BT127	GSC	0	0	0	0	0	0.206281	0.189944	0	0	0.261739
BTSC_BT127_L_GTCGGGTCATCCGGGT	-8.71004	4.03959	BT127_L	BT127	GSC	0.15181	0	0	0	0	0	0	0	0	0
BTSC_BT127_L_GTCGGGTTCATCACCC	-5.62501	10.5807	BT127_L	BT127	GSC	0	0	0	0	0	0	0	0	0	0.501665
BTSC_BT127_L_GTCGGGTTCTCCTATA	-15.9674	3.3768	BT127_L	BT127	GSC	0	0	0	0	0	0	0	0	0	0
BTSC_BT127_L_GTCGTAAGTCCGACGT	-9.80778	5.28158	BT127_L	BT127	GSC	0	0	0.183088	0	0	0.26791	0.110073	0.384537	0	0.258
BTSC_BT127_L_GTCTTCGAGAATTCCC	-22.1832	2.96981	BT127_L	BT127	GSC	0	0	0	0	0	0	0	0.256894	0	0
BTSC_BT127_L_GTCTTCGTCGAGGTAG	-16.173	2.89347	BT127_L	BT127	GSC	0	0	0	0	0	0	0.444966	0	0	0
BTSC_BT127_L_GTGAAGGCAATCACAC	-10.1315	7.36792	BT127_L	BT127	GSC	0.123503	0	0	0	0	0	0	0.261355	0	0.156012
BTSC_BT127_L_GTGAAGGGTCCAACTA	3.89051	19.3623	BT127_L	BT127	GSC	0	0	0	0	0	0.183495	0.168963	0.175059	0	0.232827
BTSC_BT127_L_GTGAAGGGTCCGCTGA	-15.225	12.9519	BT127_L	BT127	GSC	0	0	0	0	0	0.392163	0	0	0	0
BTSC_BT127_L_GTGCAGCTCCGTCAAA	1.59988	16.1256	BT127_L	BT127	GSC	0	0	0	0	0	0.191608	0.176433	0	0	0
BTSC_BT127_L_GTGCAGCTCTTGTCAT	-15.5797	2.95439	BT127_L	BT127	GSC	0	0	0.734731	0	0	0	0.441723	0	0	0.608684
BTSC_BT127_L_GTGCATAAGATCCTGT	-3.84824	-8.22205	BT127_L	BT127	GSC	0	0	0	0	0	0	0	0	0	0
BTSC_BT127_L_GTGCATAAGCTCCCAG	-15.4015	-0.63397	BT127_L	BT127	GSC	0	0	0	0	0	0	0	0	0	0
BTSC_BT127_L_GTGCATAAGCTGCCCA	3.37678	8.93026	BT127_L	BT127	GSC	0	0	0	0	0	0	0	0.379938	0	0
BTSC_BT127_L_GTGCATAAGTTAACGA	0.544742	14.7094	BT127_L	BT127	GSC	0	0	0	0	0	0	0.185831	0	0.289144	0.256071
BTSC_BT127_L_GTGCATACAGGTGCCT	-7.84687	13.9134	BT127_L	BT127	GSC	0	0	0	0	0	0	0	0	0	0
BTSC_BT127_L_GTGCATACATACCATG	-13.1023	8.78027	BT127_L	BT127	GSC	0.198842	0	0	0	0	0.197962	0	0.188861	0	0.397569
BTSC_BT127_L_GTGCGGTAGTATCTCG	-15.8075	12.508	BT127_L	BT127	GSC	0	0	0	0	0	0	0	0	0	0.625316
BTSC_BT127_L_GTGCGGTGTGCGATAG	-12.635	19.1883	BT127_L	BT127	GSC	0	0	0	0	0	0.397146	0.311232	0.153697	0	0.503917
BTSC_BT127_L_GTGCTTCCACACTGCG	-15.3753	8.39941	BT127_L	BT127	GSC	0	0	0.494377	0	0	0	0	0	0	0
BTSC_BT127_L_GTGCTTCCACAGACTT	-0.0489486	16.4845	BT127_L	BT127	GSC	0.303099	0	0	0	0	0.189307	0	0.180604	0	0
BTSC_BT127_L_GTGCTTCGTAGAGGAA	-3.31835	12.1815	BT127_L	BT127	GSC	0	0	0	0	0	0	0.333315	0	0	0
BTSC_BT127_L_GTGGGTCCACACAGAG	7.27517	16.4453	BT127_L	BT127	GSC	0	0	0	0	0	0	0.125237	0.335813	0.194862	0.172574
BTSC_BT127_L_GTGGGTCCACGGTAAG	-7.53068	9.97984	BT127_L	BT127	GSC	0	0	0	0	0	0	0	0.186245	0	0.247704
BTSC_BT127_L_GTGGGTCGTCAGTGGA	-15.3257	11.4915	BT127_L	BT127	GSC	0	0	0.496204	0	0	0	0	0	0	0
BTSC_BT127_L_GTGTGCGAGATCGGGT	-6.02112	12.1767	BT127_L	BT127	GSC	0.207991	0	0	0	0	0.325389	0	0	0.296673	0
BTSC_BT127_L_GTGTGCGCACATTAGC	-10.2266	2.15984	BT127_L	BT127	GSC	0	0	0	0	0	0	0	0	0	0
BTSC_BT127_L_GTGTGCGCAGCCTTGG	7.25249	11.533	BT127_L	BT127	GSC	0.204385	0	0	0	0.186955	0	0.110163	0	0	0
BTSC_BT127_L_GTGTGCGGTGTTCGAT	-18.0865	-11.649	BT127_L	BT127	GSC	0	0	0	0	0	0	0	0	0	0
BTSC_BT127_L_GTGTTAGAGATGCCTT	-17.4865	-9.06247	BT127_L	BT127	GSC	0	0	0	0	0	0	0	0	0	0
BTSC_BT127_L_GTGTTAGAGCCGTCGT	-11.3946	16.0546	BT127_L	BT127	GSC	0	0	0	0	0.38524	0	0	0.358983	0	0.312803
BTSC_BT127_L_GTGTTAGAGCTAGTTC	-7.96725	9.41133	BT127_L	BT127	GSC	0	0	0	0	0	0	0.201137	0.208394	0	0.277162
BTSC_BT127_L_GTGTTAGGTTTGCATG	-2.6201	3.53581	BT127_L	BT127	GSC	0	0	0.260872	0	0	0	0	0.516806	0.24403	0
BTSC_BT127_L_GTGTTAGTCATGGTCA	-7.90565	10.9388	BT127_L	BT127	GSC	0	0	0	0	0	0.208601	0.19208	0	0	0
BTSC_BT127_L_GTTAAGCAGACCACGA	-1.54512	22.1032	BT127_L	BT127	GSC	0	0	0	0	0	0	0	0	0	0
BTSC_BT127_L_GTTAAGCAGTAGTGCG	-12.4186	10.7411	BT127_L	BT127	GSC	0	0	0	0	0	0	0	0	0	0.662905
BTSC_BT127_L_GTTAAGCTCGGATGTT	-6.01768	10.5923	BT127_L	BT127	GSC	0	0	0	0	0	0	0	0	0	0
BTSC_BT127_L_GTTACAGCAGTGGGAT	-14.1994	6.89698	BT127_L	BT127	GSC	0	0	0	0	0	0	0	0	0	0
BTSC_BT127_L_GTTCTCGAGACTTTCG	-12.6686	7.24442	BT127_L	BT127	GSC	0	0	0.319248	0	0	0	0	0.198858	0	0.264479
BTSC_BT127_L_GTTTCTAAGGTGATAT	-0.707772	17.4185	BT127_L	BT127	GSC	0	0	0	0	0	0.160121	0	0	0	0
BTSC_BT127_L_GTTTCTACAACACCCG	-7.22253	8.37032	BT127_L	BT127	GSC	0	0	0	0	0	0	0	0.209396	0	0
BTSC_BT127_L_GTTTCTACACAAGTAA	-15.3431	-0.168822	BT127_L	BT127	GSC	0	0	0	0	0	0	0	0	0	0
BTSC_BT127_L_GTTTCTACAGCTGTGC	-7.76937	14.1325	BT127_L	BT127	GSC	0	0	0	0	0	0	0.336941	0	0	0
BTSC_BT127_L_GTTTCTAGTCGAACAG	-9.50304	11.6558	BT127_L	BT127	GSC	0	0	0	0	0	0.36862	0	0.172252	0	0
BTSC_BT127_L_GTTTCTATCAGCACAT	-22.9145	0.523214	BT127_L	BT127	GSC	0	0	0	0	0	0	0	0	0	0
BTSC_BT127_L_GTTTCTATCATGTAGC	-14.4622	-3.48795	BT127_L	BT127	GSC	0	0	0	0	0	0	0	0	0	0
BTSC_BT127_L_TAAACCGAGACCGGAT	-3.02554	14.9892	BT127_L	BT127	GSC	0	0	0	0	0	0	0	0	0	0
BTSC_BT127_L_TAAACCGAGTCTTGCA	-14.7881	6.9044	BT127_L	BT127	GSC	0	0	0	0	0	0	0.367801	0	0	0.506822
BTSC_BT127_L_TAAACCGAGTGCCATT	-14.5927	1.32785	BT127_L	BT127	GSC	0	0	0	0	0	0	0	0	0	0
BTSC_BT127_L_TAAGAGAAGCACACAG	-1.18512	16.2455	BT127_L	BT127	GSC	0	0	0	0	0	0.198005	0	0.564621	0	0
BTSC_BT127_L_TAAGAGAGTATTCGTG	-12.9957	1.44623	BT127_L	BT127	GSC	0	0	0.976134	0	0	0	0	0	0	0
BTSC_BT127_L_TAAGAGAGTGACGCCT	-9.0122	8.74998	BT127_L	BT127	GSC	0	0	0	0	0	0	0	0	0	0
BTSC_BT127_L_TAAGAGATCAAACCAC	-8.29992	9.76679	BT127_L	BT127	GSC	0.335325	0	0	0	0	0	0.3074	0	0	0
BTSC_BT127_L_TAAGAGATCACTTCAT	-12.3941	14.3227	BT127_L	BT127	GSC	0	0	0	0	0	0	0	0.202415	0	0.269209
BTSC_BT127_L_TAAGCGTAGTGTACGG	-10.3901	2.74401	BT127_L	BT127	GSC	0.255846	0	0	0	0	0.254713	0	0.454328	0	0
BTSC_BT127_L_TAAGCGTCAGCTGTTA	-13.2275	8.09097	BT127_L	BT127	GSC	0	0	0	0	0	0	0	0	0	0
BTSC_BT127_L_TAAGTGCGTCTCTTAT	-11.7908	12.6609	BT127_L	BT127	GSC	0	0	0.338621	0	0	0	0	0	0	0
BTSC_BT127_L_TAAGTGCTCACATACG	-8.38832	13.3859	BT127_L	BT127	GSC	0.208421	0	0	0	0	0.207498	0	0.197959	0	0.263283
BTSC_BT127_L_TAAGTGCTCCGCGCAA	-3.32398	10.0551	BT127_L	BT127	GSC	0.181308	0	0	0	0	0	0.166209	0	0	0.229033
BTSC_BT127_L_TAAGTGCTCTGATACG	-13.3025	-5.55793	BT127_L	BT127	GSC	0	0	0	0	0	0	0	0.733752	0	0
BTSC_BT127_L_TACACGAAGTTTCCTT	-11.8738	1.79183	BT127_L	BT127	GSC	0	0	0	0	0	0.480951	0	0.620167	0	0
BTSC_BT127_L_TACACGACATAGAAAC	-8.97742	8.89984	BT127_L	BT127	GSC	0	0	0	0	0	0	0	0.209686	0	0
BTSC_BT127_L_TACACGATCTATCGCC	-8.30222	11.6379	BT127_L	BT127	GSC	0	0	0	0	0	0	0.260121	0	0	0
BTSC_BT127_L_TACAGTGAGTCGTACT	-12.4493	6.0736	BT127_L	BT127	GSC	0.342915	0	0.522882	0	0	0	0	0	0	0.433179
BTSC_BT127_L_TACAGTGTCACCAGGC	-14.1455	9.3598	BT127_L	BT127	GSC	0	0	0	0	0.356459	0	0.32484	0	0	0
BTSC_BT127_L_TACCTATCAATGCCAT	-15.7577	7.36981	BT127_L	BT127	GSC	0	0	0	0	0	0	0	0	0	0
BTSC_BT127_L_TACCTATGTCACTGGC	-16.1894	-7.74691	BT127_L	BT127	GSC	0	0	0	0	0	0	0	0.579049	0	0
BTSC_BT127_L_TACCTTACATTGGCGC	-12.1286	0.080796	BT127_L	BT127	GSC	0	0	0	0	0	0	0	0	0	0
BTSC_BT127_L_TACCTTAGTCCTCTTG	-18.6155	-7.91819	BT127_L	BT127	GSC	0	0	0	0	0	0	0	0	0	0
BTSC_BT127_L_TACGGATCAGTAAGAT	-14.2415	8.06164	BT127_L	BT127	GSC	0	0	0	0	0	0	0.284534	0	0	0
BTSC_BT127_L_TACGGGCAGGGCACTA	-13.9133	-4.56396	BT127_L	BT127	GSC	0	0	0	0	0	0	0	0	0	0
BTSC_BT127_L_TACGGGCCACAACGTT	-15.0923	4.4955	BT127_L	BT127	GSC	0	0	0	0	0.820513	0	0	0	0	0
BTSC_BT127_L_TACGGGCGTACGACCC	-12.0612	11.6845	BT127_L	BT127	GSC	0.209014	0	0	0	0	0.326729	0.191608	0.198522	0.298132	0.264032
BTSC_BT127_L_TACGGTAAGGTGCTAG	-5.14947	6.95408	BT127_L	BT127	GSC	0.199788	0	0	0	0	0	0	0	0	0
BTSC_BT127_L_TACGGTAGTGTCGCTG	-5.94517	12.5558	BT127_L	BT127	GSC	0.162782	0	0	0	0	0	0	0.15461	0	0.335586
BTSC_BT127_L_TACGGTATCGCCCTTA	-6.40711	12.6629	BT127_L	BT127	GSC	0	0	0	0	0	0.0742723	0.0683901	0.247479	0	0.168826
BTSC_BT127_L_TACGGTATCTCCGGTT	-9.59183	11.4915	BT127_L	BT127	GSC	0	0	0	0	0	0	0	0.218999	0	0
BTSC_BT127_L_TACTCATAGAATGTTG	-15.3723	-4.54022	BT127_L	BT127	GSC	0	0	0	0	0	0	0	0	0	0
BTSC_BT127_L_TACTCATGTAACGACG	-8.03866	2.06224	BT127_L	BT127	GSC	0.268455	0	0	0	0	0.119178	0	0	0	0
BTSC_BT127_L_TACTCATGTGTGCGTC	-15.2306	10.2464	BT127_L	BT127	GSC	0	0	0	0	0	0	0	0	0	0.35678
BTSC_BT127_L_TACTCATTCCAGTAGT	5.94144	19.3056	BT127_L	BT127	GSC	0	0	0	0.186487	0	0	0.100869	0	0	0
BTSC_BT127_L_TACTCATTCTCTTGAT	-14.9981	10.2757	BT127_L	BT127	GSC	0	0	0	0	0	0	0	0	0	0
BTSC_BT127_L_TACTCGCCAAACGCGA	-8.14472	11.1663	BT127_L	BT127	GSC	0	0	0	0	0	0	0.421713	0.29858	0	0
BTSC_BT127_L_TACTCGCTCCAGGGCT	-7.66673	8.86096	BT127_L	BT127	GSC	0	0	0	0	0	0.19055	0.175459	0	0	0
BTSC_BT127_L_TACTTACAGGCAAAGA	-16.2526	-11.5869	BT127_L	BT127	GSC	0	0	0	0	0	0	0	0	0	0
BTSC_BT127_L_TACTTACCAGCTATTG	-3.22292	10.3385	BT127_L	BT127	GSC	0.261644	0	0	0	0	0.260485	0	0	0	0
BTSC_BT127_L_TACTTACCAGGCAGTA	-0.670949	9.12441	BT127_L	BT127	GSC	0.241846	0	0	0	0	0	0.133742	0	0	0
BTSC_BT127_L_TACTTGTAGAGACGAA	-14.6457	4.40374	BT127_L	BT127	GSC	0	0	0	0	0	0	0	0	0	0
BTSC_BT127_L_TACTTGTCAATCGAAA	-4.58561	9.7878	BT127_L	BT127	GSC	0	0	0	0	0	0.430866	0	0.535688	0	0
BTSC_BT127_L_TACTTGTCAGGGCATA	-8.72485	-1.16368	BT127_L	BT127	GSC	0	0	0	0	0	0	0.580991	0	0	0
BTSC_BT127_L_TACTTGTGTCTCTTAT	-8.62306	-1.64985	BT127_L	BT127	GSC	0	0	0	0	0	0	0	0	0	0
BTSC_BT127_L_TAGACCAAGAGGGCTT	-7.5909	6.93292	BT127_L	BT127	GSC	0	0	0	0	0	0	0.426507	0	0	0
BTSC_BT127_L_TAGACCAAGCTGGAAC	-20.5387	-0.0149051	BT127_L	BT127	GSC	0	0	0	0	0	0.504518	0	0	0	0
BTSC_BT127_L_TAGACCATCAAACCAC	-11.1495	10.2089	BT127_L	BT127	GSC	0	0	0	0	0	0.288987	0	0	0	0
BTSC_BT127_L_TAGAGCTAGCGTAATA	-3.57608	8.85988	BT127_L	BT127	GSC	0	0	0	0	0	0.302057	0	0	0.271544	0
BTSC_BT127_L_TAGAGCTGTCAATGTC	-7.79494	15.9702	BT127_L	BT127	GSC	0	0	0	0	0	0	0	0.265091	0	0
BTSC_BT127_L_TAGAGCTGTTGGAGGT	-13.155	-6.06601	BT127_L	BT127	GSC	0	0	0	0	0	0	0	0	0	0
BTSC_BT127_L_TAGAGCTTCGTCACGG	-11.1132	10.1461	BT127_L	BT127	GSC	0	0	0	0	0	0	0.413952	0.428888	0	0
BTSC_BT127_L_TAGCCGGCACAGACTT	-10.6906	-2.37443	BT127_L	BT127	GSC	0	0	0	0	0	0	0	0	0	0
BTSC_BT127_L_TAGCCGGGTGAAAGAG	-11.1651	5.03326	BT127_L	BT127	GSC	0	0	0	0	0	0	0	0	0	0
BTSC_BT127_L_TAGCCGGGTGAAATCA	-13.1808	-6.38637	BT127_L	BT127	GSC	0	0	0	0	0	0	0	0	0	0
BTSC_BT127_L_TAGGCATAGGGAGTAA	-16.3257	19.6896	BT127_L	BT127	GSC	0	0	0	0	0	0	0.314743	0	0	0
BTSC_BT127_L_TAGGCATAGTACGATA	-11.8001	12.7415	BT127_L	BT127	GSC	0	0	0	0	0	0	0.491181	0	0	0
BTSC_BT127_L_TAGGCATAGTCGTACT	-10.9184	11.3251	BT127_L	BT127	GSC	0	0	0	0	0	0	0	0	0	0
BTSC_BT127_L_TAGGCATCATGCCACG	-1.08096	8.40324	BT127_L	BT127	GSC	0.219089	0	0	0	0	0	0	0.208091	0	0.276758
BTSC_BT127_L_TAGGCATTCAACACAC	-9.07482	11.5404	BT127_L	BT127	GSC	0	0	0.556489	0	0	0	0	0	0	0.46102
BTSC_BT127_L_TAGGCATTCTCGTATT	-9.35532	7.75699	BT127_L	BT127	GSC	0.307094	0	0	0	0	0	0	0	0	0
BTSC_BT127_L_TAGTGGTCATACGCTA	-8.4085	4.97673	BT127_L	BT127	GSC	0	0	0	0	0	0	0	0.538058	0	0
BTSC_BT127_L_TAGTGGTGTACAGTTC	2.75111	13.0295	BT127_L	BT127	GSC	0.165251	0	0	0	0	0	0.15149	0.156956	0.23571	0
BTSC_BT127_L_TAGTGGTGTCTTCTCG	-16.9638	-2.86829	BT127_L	BT127	GSC	0	0	0	0	0	0	0	0	0	0
BTSC_BT127_L_TATCAGGTCCTTGCCA	-6.81853	16.1017	BT127_L	BT127	GSC	0	0	0	0	0	0	0	0.318155	0.477793	0
BTSC_BT127_L_TATCAGGTCGTAGGAG	0.549176	4.74518	BT127_L	BT127	GSC	0	0	0.476575	0	0	0	0.180783	0.484119	0	0
BTSC_BT127_L_TATCAGGTCTCACATT	-15.984	-6.94466	BT127_L	BT127	GSC	0	0	0	0	0	0	0	0	0	0
BTSC_BT127_L_TATCTCAGTCTCTTAT	-1.8671	15.4664	BT127_L	BT127	GSC	0.222861	0	0	0	0	0	0	0.328878	0	0.281523
BTSC_BT127_L_TATGCCCCACGTCAGC	-2.629	12.3899	BT127_L	BT127	GSC	0	0	0	0	0	0	0	0.169163	0	0
BTSC_BT127_L_TATTACCAGGGATACC	-8.68634	15.3034	BT127_L	BT127	GSC	0.306329	0	0	0	0	0	0	0	0	0
BTSC_BT127_L_TATTACCGTAAAGTCA	-4.09159	8.41833	BT127_L	BT127	GSC	0.20144	0	0	0	0.313391	0	0	0	0	0
BTSC_BT127_L_TATTACCGTTCTGAAC	-21.1998	-11.7009	BT127_L	BT127	GSC	0	0	0	0	1	0	0	0	0	0
BTSC_BT127_L_TATTACCTCTCCAGGG	0.125171	8.85604	BT127_L	BT127	GSC	0.285578	0	0	0	0	0	0.162463	0.271242	0	0.22387
BTSC_BT127_L_TCAACGACATGACATC	-3.98671	9.98543	BT127_L	BT127	GSC	0	0	0	0	0	0.331757	0.305483	0.508462	0	0
BTSC_BT127_L_TCAATCTAGTGAAGTT	-5.34616	23.2121	BT127_L	BT127	GSC	0	0	0	0	0	0	0	0	0	0
BTSC_BT127_L_TCAATCTCACCAACCG	-12.8918	3.09952	BT127_L	BT127	GSC	0.118825	0	0	0	0.184863	0.118299	0	0.11286	0	0.150103
BTSC_BT127_L_TCACAAGCACCATGTA	-12.5698	12.4745	BT127_L	BT127	GSC	0	0	0	0	0	0	0	0	0	0
BTSC_BT127_L_TCACAAGGTATCAGTC	-16.6514	3.53099	BT127_L	BT127	GSC	0	0	0	0	0	0	0	0	0.452884	0.401083
BTSC_BT127_L_TCACAAGGTCTCCCTA	-15.7212	8.77544	BT127_L	BT127	GSC	0	0	0	0	0	0	0	0	0	0
BTSC_BT127_L_TCACAAGTCACGACTA	4.27695	8.08966	BT127_L	BT127	GSC	0	0	0	0	0	0	0.289136	0.299569	0	0
BTSC_BT127_L_TCACGAACAACCGCCA	-11.7235	16.2333	BT127_L	BT127	GSC	0	0	0	0	0	0.261725	0.364059	1	0	0
BTSC_BT127_L_TCACGAACACCACGTG	-5.39908	13.1319	BT127_L	BT127	GSC	0	0	0	0	0	0	0	0.261976	0	0.348425
BTSC_BT127_L_TCACGAATCCACGACG	-8.63569	8.73853	BT127_L	BT127	GSC	0	0	0.461252	0	0	0	0	0	0	0
BTSC_BT127_L_TCAGATGCAAAGAATC	-4.63509	6.38053	BT127_L	BT127	GSC	0.150015	0	0	0	0	0.149351	0.137522	0	0	0.189503
BTSC_BT127_L_TCAGCAAAGAGTCGGT	-10.4922	9.03674	BT127_L	BT127	GSC	0	0	0	0	0	0.274758	0.156054	0.262127	0	0.215038
BTSC_BT127_L_TCAGCAAAGGCGTACA	-7.61846	9.64396	BT127_L	BT127	GSC	0	0	0	0	0	0	0	0	0.529689	0
BTSC_BT127_L_TCAGCAACAGCGTCCA	-9.31328	-1.77619	BT127_L	BT127	GSC	0	0	0	0	0.944087	0	0	0	0	0
BTSC_BT127_L_TCAGCAAGTCTGATCA	-8.14325	6.04983	BT127_L	BT127	GSC	0.350673	0	0	0	0	0.168077	0	0.333069	0	0
BTSC_BT127_L_TCAGCAATCACGATGT	-4.346	7.58566	BT127_L	BT127	GSC	0	0	0.194766	0	0.198718	0	0.117094	0.591635	0	0.2723
BTSC_BT127_L_TCAGCTCGTGTGAATA	-4.06639	8.30583	BT127_L	BT127	GSC	0.363588	0	0	0	0	0.490997	0.108856	0	0	0
BTSC_BT127_L_TCAGCTCGTTTGGCGC	-5.83059	11.6169	BT127_L	BT127	GSC	0	0	0	0	0	0	0	0	0	0
BTSC_BT127_L_TCAGCTCTCCAGTATG	-15.106	-1.1993	BT127_L	BT127	GSC	0	0	0	0	0	0	0	0	0	0
BTSC_BT127_L_TCAGGATAGACCTTTG	-18.8567	8.90449	BT127_L	BT127	GSC	0	0	0	0	0	0	0	0	0	0.535064
BTSC_BT127_L_TCAGGATAGAGGTTAT	-12.9323	18.9859	BT127_L	BT127	GSC	0	0	0	0	0	0	0	0.279973	0	0.372361
BTSC_BT127_L_TCAGGATCACCTTGTC	-9.94253	11.0502	BT127_L	BT127	GSC	0	0	0.298143	0	0	0.308932	0.179245	0.185712	0	0
BTSC_BT127_L_TCAGGATGTCGTCTTC	-13.4827	10.7919	BT127_L	BT127	GSC	0	0	0	0	0	0	0.271825	0	0	0.374568
BTSC_BT127_L_TCAGGTAAGCGATATA	-9.74765	5.10826	BT127_L	BT127	GSC	0	0	0	0	0	0	0	0.411835	0	0
BTSC_BT127_L_TCAGGTAAGTGTTAGA	2.22861	13.2199	BT127_L	BT127	GSC	0	0	0	0	0	0	0	0.290218	0	0
BTSC_BT127_L_TCAGGTATCACTTATC	-12.2447	9.53643	BT127_L	BT127	GSC	0	0	0.477474	0	0	0	0.287059	0	0.446648	0.395561
BTSC_BT127_L_TCATTACAGGGCTTCC	-2.19796	12.0464	BT127_L	BT127	GSC	0.163987	0	0.407639	0	0	0.163261	0	0.42929	0	0
BTSC_BT127_L_TCATTACCACTACAGT	-6.10349	7.6014	BT127_L	BT127	GSC	0	0	0.131793	0	0.134467	0	0.266171	0	0	0.192803
BTSC_BT127_L_TCATTACTCACAATGC	-8.36296	7.04415	BT127_L	BT127	GSC	0	0	0.172706	0	0.176211	0.255755	0.103832	0.184309	0	0.324513
BTSC_BT127_L_TCATTACTCGTACCGG	-5.54573	7.8335	BT127_L	BT127	GSC	0	0	0	0	0	0.349591	0	0	0	0
BTSC_BT127_L_TCATTTGAGAGCAATT	-10.0415	11.2271	BT127_L	BT127	GSC	0	0	0	0	0	0	0	0.342796	0	0.221491
BTSC_BT127_L_TCATTTGCAATGTAAG	-4.98455	-6.09712	BT127_L	BT127	GSC	0	0	0	0	0	0	0	0	0	0
BTSC_BT127_L_TCCACACAGGAACTGC	-5.40869	16.4992	BT127_L	BT127	GSC	0	0	0	0	0	0	0	0	0	0
BTSC_BT127_L_TCCACACAGTTCGCGC	-11.0697	6.64554	BT127_L	BT127	GSC	0	0	0.408472	0	0	0.319115	0	0.113394	0	0.150812
BTSC_BT127_L_TCCACACCAAAGGTGC	-14.0957	9.90753	BT127_L	BT127	GSC	0.140383	0	0.356733	0	0	0.358955	0	0	0	0.177335
BTSC_BT127_L_TCCACACGTCCCTACT	-2.03391	9.9816	BT127_L	BT127	GSC	0	0	0	0	0	0.194717	0	0.185766	0	0.247066
BTSC_BT127_L_TCCCGATAGTACGCCC	-6.9054	16.0835	BT127_L	BT127	GSC	0	0	0.267527	0	0	0.174672	0	0.166642	0	0
BTSC_BT127_L_TCCCGATGTAGCCTCG	-19.2093	24.4582	BT127_L	BT127	GSC	0	0	0	0	0	0.170369	0	0.162537	0.244091	0.216172
BTSC_BT127_L_TCCCGATGTTAAAGTG	-7.94444	16.6787	BT127_L	BT127	GSC	0	0	0	0	0	0	0	0	0	0.178876
BTSC_BT127_L_TCGAGGCAGATGTCGG	-12.4224	6.24667	BT127_L	BT127	GSC	0	0	0	0	0	0	0	0.449329	0	0
BTSC_BT127_L_TCGAGGCGTAAATGTG	-16.2459	-6.72861	BT127_L	BT127	GSC	0	0	0	0	0	0	0	0	0	0
BTSC_BT127_L_TCGAGGCTCGAGAGCA	-13.9414	-1.9141	BT127_L	BT127	GSC	0.138962	0	0	0	0.216191	0	0.212592	0	0	0
BTSC_BT127_L_TCGCGAGAGGATGGTC	-15.6066	-7.27748	BT127_L	BT127	GSC	0	0	0	0	0	0	0	0	0	0
BTSC_BT127_L_TCGCGAGCAGTATAAG	-15.6615	14.3131	BT127_L	BT127	GSC	0	0	0	0	0.136886	0	0.0806597	0.312117	0.125502	0.453955
BTSC_BT127_L_TCGCGAGGTCCATCCT	-23.2089	3.92279	BT127_L	BT127	GSC	0	0	0	0	0	0	0	0	0	0
BTSC_BT127_L_TCGCGTTCACCGAATT	4.78807	16.0287	BT127_L	BT127	GSC	0	0	0	0	0	0.177729	0	0	0	0
BTSC_BT127_L_TCGGGACAGATCCTGT	-7.08815	5.95645	BT127_L	BT127	GSC	0	0	0	0	0.262891	0	0	0	0	0.213459
BTSC_BT127_L_TCGGGACAGGGTATCG	-9.90869	12.2738	BT127_L	BT127	GSC	0	0	0	0	0	0	0	0	0	0
BTSC_BT127_L_TCGGGACCACACATGT	1.21178	12.5639	BT127_L	BT127	GSC	0	0	0.265382	0	0	0	0	0	0	0
BTSC_BT127_L_TCGGGACGTATCGCAT	-13.1312	-4.40889	BT127_L	BT127	GSC	0	0	0	0	0	0	0	0	0	0
BTSC_BT127_L_TCGGGACTCATAAAGG	-10.4866	9.54982	BT127_L	BT127	GSC	0	0	0	0	0	0	0	0	0	0.465748
BTSC_BT127_L_TCGGGACTCCTTAATC	0.791043	18.7401	BT127_L	BT127	GSC	0.171648	0	0	0	0	0.170888	0	0.337302	0	0.21683
BTSC_BT127_L_TCGGTAACATGGGACA	-8.22194	7.52114	BT127_L	BT127	GSC	0	0	0.251932	0	0	0.16449	0	0.156928	0	0.339873
BTSC_BT127_L_TCGTACCGTCCGAACC	0.395719	13.2197	BT127_L	BT127	GSC	0.245361	0	0	0	0	0.316153	0	0.556532	0	0.309945
BTSC_BT127_L_TCGTAGACAAACCTAC	1.91229	14.5305	BT127_L	BT127	GSC	0	0	0	0	0	0.143671	0.219635	0.137066	0	0.182296
BTSC_BT127_L_TCGTAGACATATGCTG	-19.2007	-8.17926	BT127_L	BT127	GSC	0	0	0	0	0	0	0	0	0	0
BTSC_BT127_L_TCGTAGATCGGAGGTA	-13.8139	3.65834	BT127_L	BT127	GSC	0	0	0	0	0	0	0	0.178598	0	0
BTSC_BT127_L_TCTATTGAGATATACG	-13.2859	13.1166	BT127_L	BT127	GSC	0	0	0	0	0	0	0.212208	0	0	0.292418
BTSC_BT127_L_TCTATTGAGGTGCTAG	-13.9425	3.64152	BT127_L	BT127	GSC	0	0	0	0	0	0	0	0	0	0
BTSC_BT127_L_TCTATTGGTCGTCTTC	2.35828	10.1308	BT127_L	BT127	GSC	0	0	0	0	0	0	0	0	0	0
BTSC_BT127_L_TCTCATAAGGAGTCTG	-11.4242	10.4304	BT127_L	BT127	GSC	0	0	0	0	0	0	0	0	0	0
BTSC_BT127_L_TCTCATATCTGCTTGC	-4.72464	7.49614	BT127_L	BT127	GSC	0	0	0	0	0.243574	0	0.143525	0	0	0
BTSC_BT127_L_TCTCTAAAGATGTGTA	-4.59478	15.654	BT127_L	BT127	GSC	0	0	0	0	0	0	0	0.22678	0	0
BTSC_BT127_L_TCTCTAAAGGCTCATT	-14.2857	12.8973	BT127_L	BT127	GSC	0	0	0	0	0	0.314507	0	0	0.4506	0
BTSC_BT127_L_TCTCTAAAGGTGACCA	-9.57025	12.5755	BT127_L	BT127	GSC	0.182367	0	0	0	0	0.181559	0	0	0.260123	0.3696
BTSC_BT127_L_TCTCTAACAATGGTCT	-0.953003	16.6041	BT127_L	BT127	GSC	0	0	0	0	0	0.140732	0.280409	0	0	0.178567
BTSC_BT127_L_TCTCTAACAGCTGTAT	-15.9926	0.714831	BT127_L	BT127	GSC	0	0	0	0	0	0	0.316208	0.327617	0	0
BTSC_BT127_L_TCTCTAAGTTTCCACC	-6.67955	8.29117	BT127_L	BT127	GSC	0	0	0	0	0	0.268106	0	0.327902	0	0
BTSC_BT127_L_TCTGAGAAGCGCTTAT	-8.50545	15.6575	BT127_L	BT127	GSC	0	0	0	0	0	0.194592	0	0	0	0
BTSC_BT127_L_TCTGAGAAGTGCCAGA	-19.7674	10.2347	BT127_L	BT127	GSC	0	0	0	0	0	0	0.291825	0	0	0.402128
BTSC_BT127_L_TCTGAGACAGTACACT	-9.74486	11.8255	BT127_L	BT127	GSC	0.169509	0	0	0	0	0.168758	0.155392	0.161	0.241783	0.214127
BTSC_BT127_L_TCTGAGATCTACTCAT	1.44835	7.71392	BT127_L	BT127	GSC	0	0	0	0	0.230378	0.147425	0	0.140648	0	0
BTSC_BT127_L_TCTGAGATCTGTTTGT	-20.1239	1.00181	BT127_L	BT127	GSC	0	0	0	0	0	0	0	0	0	0.460209
BTSC_BT127_L_TCTGGAAAGTGTCTCA	-9.07908	12.2986	BT127_L	BT127	GSC	0	0	0	0	0	0	0.240353	0.249026	0	0.331201
BTSC_BT127_L_TCTGGAACACTAAGTC	-14.791	9.12449	BT127_L	BT127	GSC	0	0	0	0	0	0.265495	0.244468	0	0	0.336872
BTSC_BT127_L_TCTGGAAGTACCGGCT	-19.1961	10.0133	BT127_L	BT127	GSC	0	0	0	0	0.512221	0	0	0	0	0
BTSC_BT127_L_TCTGGAATCCATGAAC	-17.335	17.7539	BT127_L	BT127	GSC	0	0	0	0	0	0	0.239477	0	0	0.329994
BTSC_BT127_L_TCTTCGGAGCGCTCCA	-7.89621	12.0036	BT127_L	BT127	GSC	0	0	0	0	0	0	0	0.454842	0	0.417094
BTSC_BT127_L_TCTTCGGCACAGGAGT	-3.4601	7.47309	BT127_L	BT127	GSC	0.195095	0	0	0	0	0	0.283935	0	0.278279	0
BTSC_BT127_L_TCTTCGGCAGCGATCC	-18.8724	8.02385	BT127_L	BT127	GSC	0	0	0.490892	0	0	0	0.295125	0.445529	0	0
BTSC_BT127_L_TCTTTCCAGAGGACGG	-8.16672	2.99859	BT127_L	BT127	GSC	0.136949	0	0	0	0	0	0.125544	0	0	0.289274
BTSC_BT127_L_TCTTTCCTCGCCGTGA	-17.8154	-4.95278	BT127_L	BT127	GSC	0	0	0	0	0	0	0	0	0	0
BTSC_BT127_L_TGAAAGAAGCACAGGT	-6.17867	12.0856	BT127_L	BT127	GSC	0	0	0	0	0	0.229278	0	0	0	0.449533
BTSC_BT127_L_TGAAAGAAGTTACGGG	-0.97256	7.21644	BT127_L	BT127	GSC	0.167089	0	0.25478	0	0	0	0	0	0	0
BTSC_BT127_L_TGAAAGAGTAACGTTC	-9.72799	13.0374	BT127_L	BT127	GSC	0	0	0	0	0.594132	0	0	0	0	0
BTSC_BT127_L_TGAAAGAGTTGGTTTG	3.42515	18.2827	BT127_L	BT127	GSC	0.195948	0	0	0	0	0.19508	0.17963	0	0	0
BTSC_BT127_L_TGACAACAGGATCGCA	-3.93358	7.30711	BT127_L	BT127	GSC	0	0	0	0	0	0	0	0.356448	0	0
BTSC_BT127_L_TGACAACAGGGTGTGT	-11.1481	9.48065	BT127_L	BT127	GSC	0.402216	0	0	0	0	0	0	0	0	0.337246
BTSC_BT127_L_TGACAACAGTTGAGAT	3.72364	20.8835	BT127_L	BT127	GSC	0	0	0.170261	0	0	0	0.353833	0.106055	0	0.242075
BTSC_BT127_L_TGACGGCCACATCCAA	-11.5699	8.44134	BT127_L	BT127	GSC	0	0	0	0	0	0.186107	0.171367	0.283771	0	0
BTSC_BT127_L_TGACGGCGTACGCACC	-8.15485	9.82463	BT127_L	BT127	GSC	0	0	0	0	0	0.391549	0	0.295941	0	0
BTSC_BT127_L_TGACGGCTCGTCTGAA	-8.90354	13.8108	BT127_L	BT127	GSC	0.177943	0	0	0	0	0.363356	0.163124	0.16901	0	0
BTSC_BT127_L_TGACTTTAGCGTTTAC	-15.5569	13.5745	BT127_L	BT127	GSC	0	0	0	0	0	0	0.320202	0	0	0
BTSC_BT127_L_TGACTTTGTAGGACAC	-11.4238	-1.23415	BT127_L	BT127	GSC	0	0	0	0	0	0	0	0	0	0
BTSC_BT127_L_TGAGAGGCACAGGAGT	-19.836	3.92557	BT127_L	BT127	GSC	0.283782	0	0	0	0	0	0	0	0	0
BTSC_BT127_L_TGAGAGGCACTTACGA	-13.3504	3.99573	BT127_L	BT127	GSC	0.0576934	0	0	0.0977807	0.164341	0.105166	0.196461	0.27805	0	0.397567
BTSC_BT127_L_TGAGAGGGTCAAAGCG	-16.3847	14.8131	BT127_L	BT127	GSC	0.242218	0	0	0	0	0	0	0	0.345494	0.305976
BTSC_BT127_L_TGAGAGGTCCACGTTC	-12.5286	-1.55172	BT127_L	BT127	GSC	0	0	0	0	0	0	0	0	0	0
BTSC_BT127_L_TGAGAGGTCTGCGGCA	-10.5236	9.96123	BT127_L	BT127	GSC	0	0	0	0	0	0.298269	0	0	0.427336	0
BTSC_BT127_L_TGAGCATGTCGACTGC	-16.8299	7.32422	BT127_L	BT127	GSC	0	0	0	0	0	0.159041	0	0.375459	0	0
BTSC_BT127_L_TGAGCATTCGTCTGCT	-11.5468	4.61159	BT127_L	BT127	GSC	0	0	0	0	0	0	0	0	0	0
BTSC_BT127_L_TGAGCCGCAATAAGCA	-11.4669	11.4365	BT127_L	BT127	GSC	0	0	0	0.122151	0.112127	0.338683	0	0.323113	0	0.275621
BTSC_BT127_L_TGAGCCGCATACCATG	-1.39936	18.3035	BT127_L	BT127	GSC	0	0	0	0	0	0.203754	0.29559	0.385131	0	0.407317
BTSC_BT127_L_TGAGGGAAGTCACGCC	-10.9149	13.4431	BT127_L	BT127	GSC	0	0	0	0	0	0	0	0.514587	0	0.485214
BTSC_BT127_L_TGAGGGAGTGTGTGCC	-19.9531	-5.66353	BT127_L	BT127	GSC	0	0	0	0	0	0	0	0	0	0
BTSC_BT127_L_TGATTTCAGGTGCTAG	-6.30442	10.9168	BT127_L	BT127	GSC	0	0	0	0	0	0	0.184958	0	0	0
BTSC_BT127_L_TGATTTCTCCGCATCT	-7.20709	16.3231	BT127_L	BT127	GSC	0	0	0.367378	0	0	0	0.220869	0	0	0
BTSC_BT127_L_TGCACCTGTATAGTAG	-8.17313	8.68163	BT127_L	BT127	GSC	0	0	0	0	0	0	0	0	0	0
BTSC_BT127_L_TGCACCTTCTCTAGGA	-19.1084	2.61304	BT127_L	BT127	GSC	0	0	0.558542	0	0	0	0.335797	0	0	0
BTSC_BT127_L_TGCCAAAAGTCATGCT	-18.3891	-15.3	BT127_L	BT127	GSC	0	0	0	0	0	0	0	0	0	0
BTSC_BT127_L_TGCCAAACACGCGAAA	-14.9098	5.86425	BT127_L	BT127	GSC	0	0	0	0	0	0	0	0.340986	0	0
BTSC_BT127_L_TGCCAAACATTTCACT	-17.053	-8.08862	BT127_L	BT127	GSC	0	0	0	0	0	0	0	0	0	0
BTSC_BT127_L_TGCCAAAGTACCTACA	-18.5215	19.4574	BT127_L	BT127	GSC	0	0	0	0	0	0	0.269278	0	0	0.371059
BTSC_BT127_L_TGCCAAAGTAGAGGAA	-8.7005	12.3604	BT127_L	BT127	GSC	0	0	0	0	0	0.171133	0.381538	0	0	0
BTSC_BT127_L_TGCCAAAGTCTAGCGC	-13.6888	0.419071	BT127_L	BT127	GSC	0	0	0	0	0	0	0	0	0.287785	0
BTSC_BT127_L_TGCCAAATCGGAGGTA	-19.3683	-8.42433	BT127_L	BT127	GSC	0	0	0	0	0	0	0	0	0	0
BTSC_BT127_L_TGCCCATGTCGCGGTT	-12.7637	17.0171	BT127_L	BT127	GSC	0	0	0	0	0.199328	0.127556	0.259662	0.205285	0.182751	0
BTSC_BT127_L_TGCCCATGTGGTACAG	-3.09051	12.3374	BT127_L	BT127	GSC	0.316587	0	0.305333	0	0	0	0	0.342614	0	0.252951
BTSC_BT127_L_TGCCCATGTTACGACT	-12.7459	0.749587	BT127_L	BT127	GSC	0	0	0	0	0	0	0	0	0	0
BTSC_BT127_L_TGCCCATTCACAACGT	-3.80522	1.51049	BT127_L	BT127	GSC	0	0	0	0	0	0	0	0	0	0
BTSC_BT127_L_TGCCCATTCAGTCAGT	-5.81293	16.9664	BT127_L	BT127	GSC	0	0	0	0	0	0	0	0.211099	0.31702	0
BTSC_BT127_L_TGCCCATTCCTTTCTC	-0.834834	16.5035	BT127_L	BT127	GSC	0	0	0	0	0.246342	0	0	0.150394	0	0.327751
BTSC_BT127_L_TGCCCATTCTGTCTAT	-6.35562	10.972	BT127_L	BT127	GSC	0.351837	0	0	0	0	0.350278	0	0	0	0
BTSC_BT127_L_TGCCCTAAGGTGATTA	-16.0705	12.0037	BT127_L	BT127	GSC	0	0	0	0	0	0	0	0	0	0.574399
BTSC_BT127_L_TGCCCTACAATCACAC	-8.36011	12.1605	BT127_L	BT127	GSC	0	0	0	0	0	0	0.253984	0	0	0.216024
BTSC_BT127_L_TGCCCTAGTCGGCATC	-14.3547	7.9457	BT127_L	BT127	GSC	0	0	0	0	0	0	0	0.463608	0	0
BTSC_BT127_L_TGCCCTATCGCGTAGC	-19.2238	8.41515	BT127_L	BT127	GSC	0	0	0	0	0.59128	0	0	0	0	0
BTSC_BT127_L_TGCGCAGAGAGTCGGT	-14.0374	3.42475	BT127_L	BT127	GSC	0.399621	0	0	0	0	0	0	0	0	0
BTSC_BT127_L_TGCGCAGAGCAGGCTA	-1.89512	-2.495	BT127_L	BT127	GSC	0	0	0	0	0	0	0	0	0	0
BTSC_BT127_L_TGCGCAGAGTAGCGGT	-6.97453	20.4372	BT127_L	BT127	GSC	0	0	0	0	0	0.336961	0.310274	0.464139	0	0
BTSC_BT127_L_TGCGCAGAGTGGTCCC	-15.2619	13.8325	BT127_L	BT127	GSC	0	0	0	0	0	0	0	0	0	0
BTSC_BT127_L_TGCGCAGGTCAACATC	-14.8429	3.88633	BT127_L	BT127	GSC	0	0	0	0	0	0	0.371948	0	0	0
BTSC_BT127_L_TGCGGGTAGTACGACG	0.0187586	20.4637	BT127_L	BT127	GSC	0	0	0.220469	0	0	0.309915	0	0.227937	0	0.393233
BTSC_BT127_L_TGCGGGTAGTTTAGGA	-17.4732	-10.44	BT127_L	BT127	GSC	0	0	0	0	0	0	0	0	0	0
BTSC_BT127_L_TGCGGGTTCTGCTGCT	-21.0971	-1.9538	BT127_L	BT127	GSC	0	0	0	0	0	0	0	0	0	0
BTSC_BT127_L_TGCGTGGCAGGCAGTA	-17.8247	11.2759	BT127_L	BT127	GSC	0	0	0	0	0	0	0	0	0	0.534269
BTSC_BT127_L_TGCGTGGCAGTGGGAT	-14.2833	11.0401	BT127_L	BT127	GSC	0	0	0	0	0	0	0	0	0	0
BTSC_BT127_L_TGCGTGGGTCTGCGGT	-16.0745	-1.32204	BT127_L	BT127	GSC	0	0	0	0	0	0	0	0	0	0
BTSC_BT127_L_TGCTACCAGATATGGT	-6.98426	20.6867	BT127_L	BT127	GSC	0	0	0	0	0	0	0.219822	0.227754	0	0.302909
BTSC_BT127_L_TGCTACCCAACTGCGC	-15.5101	11.8605	BT127_L	BT127	GSC	0.334485	0	0	0	0	0	0	0.45968	0	0.422529
BTSC_BT127_L_TGCTACCTCGGAGGTA	-7.67757	6.47775	BT127_L	BT127	GSC	0	0	0	0	0	0.336152	0.309529	0	0	0
BTSC_BT127_L_TGCTGCTAGCTGGAAC	-18.1915	18.2116	BT127_L	BT127	GSC	0	0	0	0	0.224785	0	0.360067	0.601668	0.115995	0.182518
BTSC_BT127_L_TGCTGCTCATTGGTAC	-12.5925	16.4146	BT127_L	BT127	GSC	0	0	0	0	0	0	0.326995	0.338794	0	0.644322
BTSC_BT127_L_TGGACGCGTCGCGGTT	-7.8443	7.52226	BT127_L	BT127	GSC	0	0	0	0	0	0	0	0.330014	0	0.438914
BTSC_BT127_L_TGGACGCGTGGTACAG	0.524172	15.6092	BT127_L	BT127	GSC	0.157604	0	0	0	0.245194	0.156906	0.358939	0	0	0
BTSC_BT127_L_TGGCCAGCACGCTTTC	-0.387634	12.6967	BT127_L	BT127	GSC	0.0927011	0	0	0.157113	0.25281	0.0922905	0	0.0880476	0	0.117102
BTSC_BT127_L_TGGCCAGTCAAAGTAG	-18.7402	-9.54708	BT127_L	BT127	GSC	0	0	0	0	0	0	0	0	0	0.780835
BTSC_BT127_L_TGGCTGGCAGCGAACA	-10.8111	2.32554	BT127_L	BT127	GSC	0	0	0	0	0	0	0	0	0	0.466373
BTSC_BT127_L_TGGCTGGTCCGGGTGT	-18.584	-6.97799	BT127_L	BT127	GSC	0	0	0	0	0	0	0	0	0	0
BTSC_BT127_L_TGGGCGTAGAGGTAGA	-9.87273	8.19698	BT127_L	BT127	GSC	0	0	0	0	0	0	0	0	0	0
BTSC_BT127_L_TGGTTAGCAGCTGTGC	-9.63883	11.9928	BT127_L	BT127	GSC	0	0	0.175418	0	0	0.114533	0.180341	0.247048	0.164093	0
BTSC_BT127_L_TGGTTAGCATACTACG	-13.2674	-3.72886	BT127_L	BT127	GSC	0	0	0	0	0	0	0	0	0	0
BTSC_BT127_L_TGGTTAGGTCCTGCTT	-9.44034	13.643	BT127_L	BT127	GSC	0	0	0	0	0.578605	0	0.340941	0	0	0
BTSC_BT127_L_TGGTTAGTCAGCATGT	-6.32267	10.3475	BT127_L	BT127	GSC	0.188037	0	0	0	0	0.187204	0	0.178598	0	0
BTSC_BT127_L_TGGTTAGTCGCGCCAA	-3.58319	23.4977	BT127_L	BT127	GSC	0	0	0	0	0	0	0.230119	0	0	0
BTSC_BT127_L_TGGTTAGTCTTTACAC	-9.27884	19.5154	BT127_L	BT127	GSC	0	0	0	0	0	0.435785	0.235128	0.243613	0	0.417455
BTSC_BT127_L_TGGTTCCCACATCCAA	-12.2309	15.5854	BT127_L	BT127	GSC	0	0	0	0	0	0.486505	0	0.205975	0.309325	0
BTSC_BT127_L_TGGTTCCCAGGCTCAC	-21.9474	19.4381	BT127_L	BT127	GSC	0	0	0	0	0	0	0.167513	0	0	0.370224
BTSC_BT127_L_TGGTTCCCAGGTCCAC	-3.06145	7.83264	BT127_L	BT127	GSC	0	0	0.11972	0	0	0.139357	0	0.0745734	0.111991	0.0991817
BTSC_BT127_L_TGGTTCCGTTAAGATG	-14.0551	-7.50317	BT127_L	BT127	GSC	0	0	0	0	0	0	0	0	0	0
BTSC_BT127_L_TGGTTCCTCAGCTTAG	-6.45627	20.3018	BT127_L	BT127	GSC	0	0	0	0	0	0	0	0	0	0
BTSC_BT127_L_TGTATTCAGTACGATA	-4.22846	4.845	BT127_L	BT127	GSC	0.264773	0	0	0	0	0.117122	0.107846	0	0	0.253425
BTSC_BT127_L_TGTATTCGTTGTCTTT	-9.89574	12.5447	BT127_L	BT127	GSC	0	0	0	0	0	0.22536	0.270734	0.333182	0.192748	0.373066
BTSC_BT127_L_TGTCCCAAGTCATGCT	-17.5033	3.17742	BT127_L	BT127	GSC	0	0	0	0	0	0	0	0.681079	0.548053	0
BTSC_BT127_L_TGTCCCAAGTGGCACA	-9.86886	12.1187	BT127_L	BT127	GSC	0	0	0	0	0	0	0.231998	0	0	0.486129
BTSC_BT127_L_TGTCCCACATGGATGG	-16.0372	-5.20686	BT127_L	BT127	GSC	0	0	0	0	0	0	0	0	0	0
BTSC_BT127_L_TGTCCCAGTGTTCGAT	-4.82217	7.66285	BT127_L	BT127	GSC	0.231905	0	0.211891	0	0	0	0	0	0	0.17554
BTSC_BT127_L_TGTCCCATCAGCAACT	-3.01311	6.50511	BT127_L	BT127	GSC	0.115535	0	0	0	0	0.115023	0	0.109735	0	0.145947
BTSC_BT127_L_TGTCCCATCAGTGTTG	-7.46711	16.4632	BT127_L	BT127	GSC	0	0	0	0	0	0.183311	0	0	0	0.372615
BTSC_BT127_L_TGTCCCATCCTAGGGC	-14.7359	9.79925	BT127_L	BT127	GSC	0	0	0	0	0	0	0	0.394035	0	0
BTSC_BT127_L_TGTGGTAAGTGAAGAG	-11.0744	5.18921	BT127_L	BT127	GSC	0.30752	0	0.217032	0	0	0	0.13048	0	0	0
BTSC_BT127_L_TGTGGTACACCAGCAC	-11.2439	18.6458	BT127_L	BT127	GSC	0	0	0	0	0	0.280732	0.385717	0	0	0.356205
BTSC_BT127_L_TGTGGTAGTACCGGCT	-13.9925	6.70439	BT127_L	BT127	GSC	0	0	0	0	0	0	0	0	0	0
BTSC_BT127_L_TGTGTTTAGACTGTAA	-7.15944	14.9087	BT127_L	BT127	GSC	0	0	0	0	0	0	0	0	0	0
BTSC_BT127_L_TGTTCCGAGTAGTGCG	4.67116	10.6507	BT127_L	BT127	GSC	0	0	0	0	0	0	0	0	0	0
BTSC_BT127_L_TGTTCCGTCGCCTGAG	-12.4667	7.02684	BT127_L	BT127	GSC	0	0	0	0	0	0	0	0	0	0
BTSC_BT127_L_TTAACTCAGGATTCGG	-11.5717	2.26956	BT127_L	BT127	GSC	0.36588	0	0	0	0	0	0	0	0	0
BTSC_BT127_L_TTAGGACCATTCCTCG	-12.5411	10.172	BT127_L	BT127	GSC	0	0	0	0	0	0.385097	0	0	0	0.321676
BTSC_BT127_L_TTAGGACGTGTATGGG	-16.2309	-4.12279	BT127_L	BT127	GSC	0	0	0	0	0	0	0	0	0	0
BTSC_BT127_L_TTAGGACTCCAAAGTC	-12.5802	12.0839	BT127_L	BT127	GSC	0	0	0	0	0	0.336646	0	0.726098	0	0
BTSC_BT127_L_TTAGGCAAGATGTAAC	-10.3554	11.5057	BT127_L	BT127	GSC	0	0	0	0	0	0.182857	0	0.355061	0	0.232017
BTSC_BT127_L_TTAGGCAAGTGACTCT	-20.1388	8.67616	BT127_L	BT127	GSC	0	0	0.433608	0	0	0	0.473747	0	0	0
BTSC_BT127_L_TTAGTTCAGCGTTGCC	2.41633	10.9304	BT127_L	BT127	GSC	0	0	0	0	0	0	0	0.186459	0	0
BTSC_BT127_L_TTAGTTCCAACTGGCC	-15.7673	-1.58714	BT127_L	BT127	GSC	0	0	0	0	0	0	0	0	0	0
BTSC_BT127_L_TTAGTTCTCACCTCGT	-18.178	16.8173	BT127_L	BT127	GSC	0	0	0	0	0	0.250218	0.230401	0	0	0
BTSC_BT127_L_TTAGTTCTCGTACCGG	-10.529	9.82615	BT127_L	BT127	GSC	0	0	0	0	0	0	0	0	0	0
BTSC_BT127_L_TTAGTTCTCTATGTGG	-16.795	0.510084	BT127_L	BT127	GSC	0	0	0	0	0	0	0	0	0	0
BTSC_BT127_L_TTATGCTCAACACCCG	-13.6453	17.9155	BT127_L	BT127	GSC	0	0	0	0	0	0.565761	0.270437	0.355762	0	0.232624
BTSC_BT127_L_TTATGCTCACTGTTAG	-5.38818	13.5171	BT127_L	BT127	GSC	0.172227	0	0	0	0	0	0.25552	0.264739	0	0
BTSC_BT127_L_TTATGCTTCACCTTAT	-11.9943	1.97717	BT127_L	BT127	GSC	0	0	0	0	0	0	0.0856318	0.0887216	0	0.117999
BTSC_BT127_L_TTCCCAGCAAATTGCC	-2.78523	14.7351	BT127_L	BT127	GSC	0	0	0	0	0	0	0.0910512	0.0943367	0	0
BTSC_BT127_L_TTCCCAGCACCGTTGG	-5.24918	16.2843	BT127_L	BT127	GSC	0	0	0	0	0	0.167463	0.250439	0.259475	0	0
BTSC_BT127_L_TTCCCAGCATAGAAAC	-14.2691	5.50671	BT127_L	BT127	GSC	0.443454	0	0	0	0	0	0	0	0	0
BTSC_BT127_L_TTCGAAGAGGTGCAAC	-0.440252	11.8024	BT127_L	BT127	GSC	0.137863	0	0	0	0	0	0	0.130942	0	0.378938
BTSC_BT127_L_TTCGAAGCAGATTGCT	-11.8366	12.5022	BT127_L	BT127	GSC	0	0	0	0	0	0.55362	0	0	0	0
BTSC_BT127_L_TTCGAAGGTCGAGATG	-3.62749	14.2562	BT127_L	BT127	GSC	0	0	0	0	0	0.350894	0	0	0	0
BTSC_BT127_L_TTCGAAGGTGCCTGTG	-3.745	9.26022	BT127_L	BT127	GSC	0.189741	0	0.289321	0	0	0.188901	0	0.180217	0	0.239686
BTSC_BT127_L_TTCGAAGTCTGTACGA	-8.15248	10.323	BT127_L	BT127	GSC	0	0	0.492348	0	0.318929	0	0.187928	0.306682	0	0.258961
BTSC_BT127_L_TTCGGTCCATTTGCTT	-9.15511	9.57075	BT127_L	BT127	GSC	0	0	0	0	0	0.408142	0	0	0	0.517869
BTSC_BT127_L_TTCGGTCGTAGCTCCG	-5.33045	-1.96695	BT127_L	BT127	GSC	0	0	0	0	0	0	0	0	0	0
BTSC_BT127_L_TTCGGTCGTGTGAATA	-11.4077	7.93454	BT127_L	BT127	GSC	0	0	0	0	0	0.355644	0	0	0	0.218516
BTSC_BT127_L_TTCGGTCGTTCCGGCA	-15.2518	0.314897	BT127_L	BT127	GSC	0	0	0	0	0	0	0	0	0	0
BTSC_BT127_L_TTCGGTCTCCGCATAA	-2.35972	9.75287	BT127_L	BT127	GSC	0.188801	0	0	0	0	0.187964	0.173078	0	0	0
BTSC_BT127_L_TTCGGTCTCCTGCAGG	-9.48949	11.2427	BT127_L	BT127	GSC	0.16537	0	0	0	0	0	0.246835	0	0	0.208899
BTSC_BT127_L_TTCTACAAGCTGAAAT	-19.3715	9.06798	BT127_L	BT127	GSC	0	0	0	0	0	0	0.36287	0	0	0.500027
BTSC_BT127_L_TTCTACACAACACCTA	-9.97568	2.45835	BT127_L	BT127	GSC	0	0	0	0	0	0	0	0	0	0
BTSC_BT127_L_TTCTACACAATCAGAA	-15.6251	4.19774	BT127_L	BT127	GSC	0	0	0	0	0	0	0.400823	0	0	0
BTSC_BT127_L_TTCTACAGTCAAAGAT	-7.10991	16.6279	BT127_L	BT127	GSC	0	0	0	0.155507	0.142746	0.215711	0	0.377559	0	0.203399
BTSC_BT127_L_TTCTACAGTCCAGTGC	-22.3398	-11.5636	BT127_L	BT127	GSC	0	0	0	0	0	0	0	0	0	0
BTSC_BT127_L_TTCTACATCCTTTCTC	-13.4443	-0.680159	BT127_L	BT127	GSC	0	0	0	0	0	0	0	0	0	0
BTSC_BT127_L_TTCTACATCGTAGATC	-1.1834	22.8517	BT127_L	BT127	GSC	0	0	0	0	0	0.25088	0	0.145358	0.218292	0.193324
BTSC_BT127_L_TTCTCAAAGATGCCTT	-3.61189	11.8653	BT127_L	BT127	GSC	0.20312	0	0	0	0	0	0.293722	0	0	0.256586
BTSC_BT127_L_TTCTCAAGTGTTGGGA	2.17752	8.40285	BT127_L	BT127	GSC	0	0	0	0	0	0	0	0.103196	0	0.137249
BTSC_BT127_L_TTCTCCTCAAGCGCTC	-6.89396	18.0075	BT127_L	BT127	GSC	0	0	0	0	0	0	0.281319	0	0	0.387652
BTSC_BT127_L_TTCTCCTCAATGGACG	-8.06019	9.96834	BT127_L	BT127	GSC	0	0	0	0	0	0	0.182138	0	0.283397	0
BTSC_BT127_L_TTCTCCTCAGATCGGA	-10.3769	8.22224	BT127_L	BT127	GSC	0	0	0	0	0	0.263306	0	0	0	0.429101
BTSC_BT127_L_TTCTCCTGTCATCGGC	-0.524194	10.6668	BT127_L	BT127	GSC	0	0	0	0	0	0.200993	0.185075	0	0	0
BTSC_BT127_L_TTCTCCTGTTCCGTCT	-19.871	-3.65989	BT127_L	BT127	GSC	0	0	0	0	0	0	0	0	0	0
BTSC_BT127_L_TTCTCCTTCCTCCTAG	-18.426	12.3631	BT127_L	BT127	GSC	0	0	0	0	0	0.296456	0.48991	0	0	0.376156
BTSC_BT127_L_TTCTTAGTCATGTCTT	-18.0865	-12.8471	BT127_L	BT127	GSC	0	0	0	0	0	0	0	0	0	0
BTSC_BT127_L_TTGAACGAGTACGTAA	-13.4934	11.0911	BT127_L	BT127	GSC	0	0	0	0	0	0	0	0.599968	0.661604	0
BTSC_BT127_L_TTGAACGCATTATCTC	-15.2624	11.3752	BT127_L	BT127	GSC	0	0	0	0	0	0	0.274837	0	0	0.378719
BTSC_BT127_L_TTGAACGGTCAGGACA	-15.9435	6.67997	BT127_L	BT127	GSC	0	0	0	0	0	0	0	0	0	0.564266
BTSC_BT127_L_TTGAACGTCGAATCCA	-21.8246	18.5998	BT127_L	BT127	GSC	0.192312	0	0	0	0	0.19146	0	0	0	0.38655
BTSC_BT127_L_TTGCGTCAGCTAGTTC	-6.02	7.42966	BT127_L	BT127	GSC	0.156918	0	0.23927	0	0	0	0.236017	0	0	0
BTSC_BT127_L_TTGCGTCAGGTGATTA	-9.94956	12.0717	BT127_L	BT127	GSC	0	0	0	0	0	0.228487	0.210391	0.130407	0	0.17344
BTSC_BT127_L_TTGCGTCAGTAACCCT	-7.505	3.47686	BT127_L	BT127	GSC	0.106355	0	0	0	0	0	0.0974984	0	0	0.134351
BTSC_BT127_L_TTGGAACAGAGCCTAG	-9.48608	-8.38491	BT127_L	BT127	GSC	0	0	0	0	0	0	0	0	0	0
BTSC_BT127_L_TTGGAACTCCGAATGT	-6.01687	7.10922	BT127_L	BT127	GSC	0	0	0.377982	0	0	0	0	0.1426	0	0
BTSC_BT127_L_TTGGCAAAGAATGTTG	-12.5801	12.472	BT127_L	BT127	GSC	0	0	0	0	0	0	0	0	0	0
BTSC_BT127_L_TTGGCAAAGCGATTCT	-11.2505	12.6726	BT127_L	BT127	GSC	0	0	0	0	0	0	0	0.316568	0	0
BTSC_BT127_L_TTGGCAACAGATCCAT	-11.6703	0.723929	BT127_L	BT127	GSC	0	0	0	0	0	0	0	0.569739	0	0
BTSC_BT127_L_TTGTAGGAGACCTAGG	-1.82498	11.2537	BT127_L	BT127	GSC	0.185082	0	0	0	0	0.184262	0	0	0	0
BTSC_BT127_L_TTGTAGGAGATGTAAC	-3.5837	15.025	BT127_L	BT127	GSC	0	0	0	0	0	0.117566	0.108255	0	0	0
BTSC_BT127_L_TTGTAGGAGGGCTCTC	-0.120561	6.81753	BT127_L	BT127	GSC	0	0	0	0	0	0.312955	0	0.139071	0	0
BTSC_BT127_L_TTGTAGGCAGATGGGT	-11.9592	8.10156	BT127_L	BT127	GSC	0	0	0.135384	0	0	0.209972	0.143331	0.505466	0.126644	0.266422
BTSC_BT127_L_TTGTAGGTCAACTCTT	-16.7842	-6.71144	BT127_L	BT127	GSC	0	0	0	0	0	0	0	0	0	0
BTSC_BT127_L_TTTACTGAGTTATCGC	-15.3662	6.13405	BT127_L	BT127	GSC	0	0	0	0	0	0	0	0.340545	0	0
BTSC_BT127_L_TTTACTGGTGGAAAGA	-4.99882	8.49177	BT127_L	BT127	GSC	0	0	0	0	0	0.342982	0	0.470901	0	0.543301
BTSC_BT127_L_TTTACTGTCACCATAG	-4.97486	11.1875	BT127_L	BT127	GSC	0	0	0	0	0	0	0	0.20302	0	0
BTSC_BT127_L_TTTATGCCAGAGTGTG	-13.0406	2.44934	BT127_L	BT127	GSC	0	0	0	0	0	0	0	0	0	0
BTSC_BT127_L_TTTATGCGTAGAGCTG	2.35443	13.1735	BT127_L	BT127	GSC	0.168567	0	0	0	0	0	0.321096	0.259947	0	0
BTSC_BT127_L_TTTATGCGTTCAGTAC	-4.48016	9.05957	BT127_L	BT127	GSC	0	0	0	0	0	0.241407	0	0	0	0.306308
BTSC_BT127_L_TTTATGCTCGAACGGA	-15.8529	3.69159	BT127_L	BT127	GSC	0	0	0	0	0	0.178575	0.264482	0.274026	0	0
BTSC_BT127_L_TTTCCTCAGGGAACGG	-4.93897	6.57772	BT127_L	BT127	GSC	0	0	0	0	0.403	0.157345	0	0	0	0.199646
BTSC_BT127_L_TTTCCTCAGGGTTCCC	-6.96777	10.8201	BT127_L	BT127	GSC	0	0	0	0	0	0	0.483425	0.595916	0	0
BTSC_BT127_L_TTTCCTCTCACATACG	-15.5208	-11.1985	BT127_L	BT127	GSC	0	0	0	0	0	0	0	0	0	0
BTSC_BT127_L_TTTCCTCTCTCGCTTG	-5.8435	1.65464	BT127_L	BT127	GSC	0	0	0	0	0	0.471178	0	0	0	0
BTSC_BT127_L_TTTGCGCAGTACCGGA	-5.90162	11.1288	BT127_L	BT127	GSC	0	0	0.203724	0	0	0	0.122479	0	0	0
BTSC_BT127_L_TTTGCGCCACTTCTGC	-1.74903	13.1739	BT127_L	BT127	GSC	0.137754	0	0	0	0	0	0.126282	0	0	0
BTSC_BT127_L_TTTGCGCGTAAACACA	-15.2085	-3.5675	BT127_L	BT127	GSC	0	0	0	0	0	0	0	0	0	0
BTSC_BT127_L_TTTGCGCTCACAGTAC	-9.03443	15.474	BT127_L	BT127	GSC	0	0	0	0	0	0	0.317687	0	0	0
BTSC_BT127_L_TTTGGTTAGAGCCTAG	-3.17448	8.25978	BT127_L	BT127	GSC	0	0	0	0	0	0.332959	0	0	0	0.270057
BTSC_BT127_L_TTTGGTTAGCCGATTT	-4.79291	9.74607	BT127_L	BT127	GSC	0.188814	0	0	0	0.293748	0	0	0	0	0.238514
BTSC_BT127_L_TTTGGTTAGCTGCAAG	-15.2098	15.0981	BT127_L	BT127	GSC	0	0	0	0	0	0.49286	0	0.254664	0	0
BTSC_BT127_L_TTTGGTTTCTACTATC	-10.7453	14.8835	BT127_L	BT127	GSC	0	0	0	0	0	0.144224	0	0.497779	0	0
BTSC_BT127_L_TTTGTCAAGCTGTTCA	-2.14704	6.90203	BT127_L	BT127	GSC	0	0	0	0	0	0	0.29794	0.30869	0	0
BTSC_BT127_L_TTTGTCACATGACATC	-7.39068	9.79837	BT127_L	BT127	GSC	0	0	0	0	0	0.152312	0.298104	0	0	0.19326
BTSC_BT127_L_TTTGTCATCCGCATCT	-5.53893	10.4271	BT127_L	BT127	GSC	0.147274	0	0	0	0	0	0.135009	0	0.210067	0.186039
BTSC_BT127_L_TTTGTCATCTGCCCTA	3.88956	18.349	BT127_L	BT127	GSC	0	0	0	0	0	0	0	0	0	0
BTSC_BT147_L_AAACCTGGTCACTTCC	-13.1195	12.8433	BT147_L	BT147	GSC	0	0	0	0	0	0.248578	0.228891	0.431301	0.100516	0.160302
BTSC_BT147_L_AAACCTGTCCAAACAC	-4.7149	9.3667	BT147_L	BT147	GSC	0	0	0	0	0.0811532	0.0519322	0.269538	0.389001	0	0.250199
BTSC_BT147_L_AAACCTGTCCACGTTC	-8.29763	16.8382	BT147_L	BT147	GSC	0	0	0	0	0.179611	0.354998	0.180901	0.187428	0.164674	0
BTSC_BT147_L_AAAGATGTCGTAGGTT	4.36989	15.568	BT147_L	BT147	GSC	0.0828262	0	0	0	0.128857	0.146242	0.13466	0.0786684	0	0.104628
BTSC_BT147_L_AAAGCAACATTACGAC	-3.33337	10.597	BT147_L	BT147	GSC	0	0	0.107285	0	0	0.0700474	0	0.318008	0	0.160074
BTSC_BT147_L_AAAGCAATCAGGCAAG	-1.96504	14.6683	BT147_L	BT147	GSC	0	0	0	0	0	0.505626	0.210382	0.283999	0	0.173432
BTSC_BT147_L_AAAGTAGGTTTAGCTG	-9.04054	13.9984	BT147_L	BT147	GSC	0	0	0	0	0	0.428173	0.367531	0.171124	0	0.131525
BTSC_BT147_L_AAATGCCAGATCCCGC	-21.5948	-8.13052	BT147_L	BT147	GSC	0	0	0	0	0	0.20943	0.192844	0.42217	0.0883682	0.0412571
BTSC_BT147_L_AAATGCCCAAGAAAGG	-0.0729756	17.3177	BT147_L	BT147	GSC	0	0	0	0	0	0.254257	0	0.291263	0	0.243549
BTSC_BT147_L_AAATGCCCAGTCGATT	8.35931	20.2239	BT147_L	BT147	GSC	0	0	0	0	0	0.266382	0.109282	0.469488	0.170037	0.256376
BTSC_BT147_L_AAATGCCTCTAAGCCA	2.11018	14.8662	BT147_L	BT147	GSC	0	0	0	0	0.226466	0.278161	0.181045	0	0.207632	0
BTSC_BT147_L_AACCATGAGTACGTAA	-2.24068	16.7401	BT147_L	BT147	GSC	0	0	0	0	0	0.485498	0.424742	0.386907	0	0
BTSC_BT147_L_AACCATGGTAAATACG	-2.44964	15.0378	BT147_L	BT147	GSC	0	0	0	0	0	0.119122	0.271281	0.30494	0	0
BTSC_BT147_L_AACCATGGTCAAAGAT	-19.2477	17.0793	BT147_L	BT147	GSC	0	0	0	0	0	0.255589	0.264638	0.647005	0	0.278823
BTSC_BT147_L_AACCATGGTCGTTGTA	-7.24776	12.9991	BT147_L	BT147	GSC	0	0	0	0	0	0.408725	0.299734	0.389935	0	0
BTSC_BT147_L_AACGTTGAGAGTACAT	-14.6839	-3.29753	BT147_L	BT147	GSC	0	0	0	0	0.231083	0.0834841	0.18444	0.112105	0.064197	0.187632
BTSC_BT147_L_AACGTTGCACAGACTT	3.63724	20.5057	BT147_L	BT147	GSC	0	0	0	0	0	0.220498	0	0.210361	0.134437	0.208332
BTSC_BT147_L_AACTCAGCAGACTCGC	-3.2875	14.2493	BT147_L	BT147	GSC	0	0	0	0	0	0.277974	0.305322	0.119491	0	0
BTSC_BT147_L_AACTCAGGTCAACATC	-4.46051	7.70269	BT147_L	BT147	GSC	0	0	0	0	0	0.111227	0	0	0	0
BTSC_BT147_L_AACTCAGGTGCGAAAC	-10.8821	2.29181	BT147_L	BT147	GSC	0	0	0	0	0	0.242366	0.134769	0.2995	0.0825291	0.133794
BTSC_BT147_L_AACTCCCAGGCATGTG	-2.87638	8.71253	BT147_L	BT147	GSC	0	0	0	0	0	0.0673629	0.221983	0.197102	0	0.154469
BTSC_BT147_L_AACTCCCCACACTGCG	-11.4231	12.1679	BT147_L	BT147	GSC	0	0	0	0	0.281375	0.289252	0	0.316045	0.149158	0
BTSC_BT147_L_AACTCTTAGGCCGAAT	-12.3029	12.2528	BT147_L	BT147	GSC	0	0	0	0	0	0.316385	0	0.191053	0.168312	0.254098
BTSC_BT147_L_AACTCTTTCAAAGTAG	-11.7901	4.88066	BT147_L	BT147	GSC	0	0	0	0	0.201395	0	0.47519	0.207135	0	0.163527
BTSC_BT147_L_AACTCTTTCACTTATC	3.19514	13.2532	BT147_L	BT147	GSC	0.0822808	0	0	0	0	0	0.181565	0.188117	0	0
BTSC_BT147_L_AACTGGTAGATATGCA	-5.79304	13.8335	BT147_L	BT147	GSC	0	0	0	0	0	0.370665	0.307489	0.173517	0	0
BTSC_BT147_L_AACTGGTGTGTTCTTT	5.29927	19.1552	BT147_L	BT147	GSC	0	0	0	0	0	0	0.163627	0.226123	0	0
BTSC_BT147_L_AACTTTCCACGTCAGC	-6.57324	17.5525	BT147_L	BT147	GSC	0	0	0	0	0	0.145573	0.383958	0.298252	0.208565	0.18471
BTSC_BT147_L_AACTTTCTCTACTATC	-6.12193	15.5737	BT147_L	BT147	GSC	0	0	0	0	0	0	0.169167	0.175271	0	0.135138
BTSC_BT147_L_AACTTTCTCTGAGTGT	-11.4874	11.8803	BT147_L	BT147	GSC	0	0	0	0	0	0.066977	0.22102	0.33072	0	0.211292
BTSC_BT147_L_AAGCCGCCAATGGTCT	0.47317	18.3302	BT147_L	BT147	GSC	0	0	0	0	0	0.177327	0	0.346907	0	0.225
BTSC_BT147_L_AAGCCGCCACACTGCG	-14.3679	17.0975	BT147_L	BT147	GSC	0	0	0	0	0	0.399237	0.165218	0.380883	0.148567	0.419162
BTSC_BT147_L_AAGCCGCGTATTAGCC	-1.30849	14.8597	BT147_L	BT147	GSC	0	0	0	0	0	0.214579	0	0.268355	0	0
BTSC_BT147_L_AAGCCGCTCCGTACAA	-12.6213	5.7933	BT147_L	BT147	GSC	0	0	0	0	0	0.113696	0.104691	0.217289	0.224973	0.0793241
BTSC_BT147_L_AAGGAGCCAGACGTAG	2.78776	10.6067	BT147_L	BT147	GSC	0	0	0	0	0	0.221746	0.0678194	0.303843	0.105523	0.281361
BTSC_BT147_L_AAGGAGCCAGTCACTA	-8.27451	12.0447	BT147_L	BT147	GSC	0	0	0	0	0	0.273278	0.223243	0.160661	0.175615	0.155528
BTSC_BT147_L_AAGGAGCGTACAAGTA	2.90304	13.7965	BT147_L	BT147	GSC	0	0	0	0	0	0.235246	0.216615	0.168141	0	0
BTSC_BT147_L_AAGGAGCGTATATGAG	-5.47889	11.6035	BT147_L	BT147	GSC	0	0	0	0	0.137845	0.387106	0.420695	0.0841554	0.126381	0.111926
BTSC_BT147_L_AAGGCAGAGAAACCTA	4.41807	18.8407	BT147_L	BT147	GSC	0	0	0	0	0	0.0902229	0.239006	0.151249	0.22714	0
BTSC_BT147_L_AAGGCAGCAATGGAAT	-7.50973	11.086	BT147_L	BT147	GSC	0	0	0	0	0	0.112359	0	0.2433	0	0
BTSC_BT147_L_AAGGTTCAGATGTTAG	-0.768131	14.6857	BT147_L	BT147	GSC	0	0	0	0	0	0.236112	0.251897	0.0761324	0	0
BTSC_BT147_L_AAGGTTCCACAAGCCC	-7.28135	12.826	BT147_L	BT147	GSC	0	0	0	0	0	0.168938	0.155558	0.334368	0	0.264499
BTSC_BT147_L_AAGGTTCGTCAGCTAT	-2.5071	11.1781	BT147_L	BT147	GSC	0	0	0	0	0.127452	0.277978	0.0751006	0	0.116853	0.103487
BTSC_BT147_L_AAGTCTGGTGTAACGG	-4.48815	9.92159	BT147_L	BT147	GSC	0	0	0	0	0.0930412	0.360658	0.138663	0.103711	0	0.0755465
BTSC_BT147_L_AATCCAGTCAAGGTAA	-9.67159	15.3967	BT147_L	BT147	GSC	0	0	0	0	0.225575	0.27727	0.338271	0.415582	0	0.431913
BTSC_BT147_L_AATCCAGTCTAGCACA	-5.81341	14.7916	BT147_L	BT147	GSC	0	0	0	0	0	0.311086	0.133194	0.350994	0	0
BTSC_BT147_L_AATCGGTGTAGTAGTA	0.810729	12.9538	BT147_L	BT147	GSC	0	0	0	0	0.0923899	0.218189	0.347134	0.103042	0	0.0750177
BTSC_BT147_L_AATCGGTTCGCCTGAG	-5.43079	17.5435	BT147_L	BT147	GSC	0	0	0	0	0	0.623198	0	0.42085	0	0
BTSC_BT147_L_ACACCAAAGATAGTCA	-9.32736	1.04403	BT147_L	BT147	GSC	0	0	0.0797608	0	0	0.197619	0.206931	0.0916317	0.0746115	0.0660774
BTSC_BT147_L_ACACCAAAGTATGACA	1.67747	29.2155	BT147_L	BT147	GSC	0	0	0	0	0	0.260961	0.509334	0.320058	0	0.202428
BTSC_BT147_L_ACACCAATCGGCGGTT	-9.26023	14.0808	BT147_L	BT147	GSC	0	0	0	0	0	0.308808	0.131937	0.393611	0	0.301951
BTSC_BT147_L_ACACCCTAGGAGTCTG	-4.5275	12.3538	BT147_L	BT147	GSC	0	0	0	0	0	0.189327	0.174333	0.105135	0	0
BTSC_BT147_L_ACACCCTTCCAAGTAC	-5.70854	8.85089	BT147_L	BT147	GSC	0	0	0	0	0.166047	0.183341	0	0.101373	0	0.232632
BTSC_BT147_L_ACACCGGCACAGACTT	-0.925955	14.8889	BT147_L	BT147	GSC	0	0	0	0	0	0.161875	0.0850372	0.154433	0	0.117179
BTSC_BT147_L_ACACTGAAGAAGGACA	3.34759	20.1617	BT147_L	BT147	GSC	0	0	0	0	0	0	0.363563	0.437105	0	0.146976
BTSC_BT147_L_ACACTGAAGCCGTCGT	-13.0931	9.14369	BT147_L	BT147	GSC	0	0	0	0	0	0.246294	0.0990558	0.389917	0.154126	0.189213
BTSC_BT147_L_ACACTGAAGTGTCTCA	-6.07315	12.0924	BT147_L	BT147	GSC	0	0	0	0	0	0.311075	0.205573	0.090894	0	0.211179
BTSC_BT147_L_ACAGCCGGTGGTCCGT	-11.8116	16.4142	BT147_L	BT147	GSC	0	0	0	0	0	0.333804	0.0969045	0.437524	0	0
BTSC_BT147_L_ACAGCCGGTTATCCGA	0.265483	9.8847	BT147_L	BT147	GSC	0	0	0	0	0.0899912	0.146327	0.053027	0.100573	0	0.185666
BTSC_BT147_L_ACAGCTATCAGAGGTG	3.57074	14.1532	BT147_L	BT147	GSC	0	0	0	0	0	0.0803827	0.1316	0.0766873	0	0
BTSC_BT147_L_ACAGCTATCCTGCCAT	1.16346	17.0626	BT147_L	BT147	GSC	0.0951131	0	0	0	0	0.404792	0.0871924	0.25692	0	0.341701
BTSC_BT147_L_ACAGCTATCTTAGAGC	-2.21308	13.2609	BT147_L	BT147	GSC	0	0	0.107111	0	0	0.307379	0.0643957	0.236583	0	0
BTSC_BT147_L_ACATCAGGTCCATCCT	-8.18303	7.39298	BT147_L	BT147	GSC	0	0	0	0	0.14746	0.453159	0.151948	0.256244	0	0
BTSC_BT147_L_ACATGGTGTTCACGGC	-5.44531	11.185	BT147_L	BT147	GSC	0	0	0	0	0	0.403434	0.223103	0	0	0
BTSC_BT147_L_ACCAGTACAAGCGTAG	-4.91803	10.696	BT147_L	BT147	GSC	0	0	0	0	0	0.287442	0	0.274228	0	0
BTSC_BT147_L_ACCAGTAGTGGGTCAA	-9.04486	12.374	BT147_L	BT147	GSC	0	0	0	0	0	0.179346	0.220091	0.315047	0.256953	0.30328
BTSC_BT147_L_ACCCACTTCCCATTTA	-9.91821	-0.854393	BT147_L	BT147	GSC	0.0478856	0	0	0	0.193949	0.21011	0.254125	0	0.0683027	0.0604902
BTSC_BT147_L_ACCGTAAGTACAAGTA	-9.67555	12.5967	BT147_L	BT147	GSC	0	0	0	0	0.148797	0.346379	0.0876778	0.0908415	0.136422	0.211071
BTSC_BT147_L_ACCGTAAGTGAGGCTA	-11.5916	9.44754	BT147_L	BT147	GSC	0	0	0	0	0	0.10574	0.168094	0.438757	0	0.134168
BTSC_BT147_L_ACCTTTACATCACCCT	-7.58836	13.7381	BT147_L	BT147	GSC	0	0	0	0	0	0.269384	0.152474	0.508218	0	0.513748
BTSC_BT147_L_ACCTTTATCGTCCAGG	-1.57704	18.2473	BT147_L	BT147	GSC	0	0	0	0	0	0.434336	0.309126	0.232372	0	0
BTSC_BT147_L_ACGAGGAAGTAAGTAC	-2.73848	14.3974	BT147_L	BT147	GSC	0.119458	0	0	0	0	0.435402	0	0.193118	0	0
BTSC_BT147_L_ACGATACCAGTAAGAT	-1.02592	12.5869	BT147_L	BT147	GSC	0	0	0	0	0	0.198758	0.385833	0.50261	0	0.356335
BTSC_BT147_L_ACGATACTCTACTTAC	1.7459	19.0209	BT147_L	BT147	GSC	0	0	0	0	0	0.0793531	0.487976	0.224272	0.113691	0.243669
BTSC_BT147_L_ACGATGTTCAGTGCAT	-13.2932	16.8299	BT147_L	BT147	GSC	0	0	0	0	0	0.109657	0.316355	0.51283	0.157108	0
BTSC_BT147_L_ACGCAGCAGTTAGGTA	-3.16057	15.0692	BT147_L	BT147	GSC	0	0	0	0	0.151707	0.169241	0.208741	0.216273	0	0.287641
BTSC_BT147_L_ACGCAGCTCGAATCCA	3.21969	15.1043	BT147_L	BT147	GSC	0	0	0	0	0	0.151163	0.139191	0.194998	0	0.191802
BTSC_BT147_L_ACGCCAGAGCTAGGCA	-18.5357	7.12707	BT147_L	BT147	GSC	0	0	0	0	0.151191	0.168729	0.124328	0.281298	0	0.171321
BTSC_BT147_L_ACGCCAGAGCTGCCCA	-2.46331	10.757	BT147_L	BT147	GSC	0	0	0	0	0.151168	0.350114	0.155345	0.300018	0	0.122743
BTSC_BT147_L_ACGCCAGCACAGACAG	-7.68008	4.67314	BT147_L	BT147	GSC	0	0	0	0	0	0.099846	0.128056	0.574868	0	0.176458
BTSC_BT147_L_ACGCCAGCATGTTCCC	-11.3419	-0.0460496	BT147_L	BT147	GSC	0	0	0	0	0.110715	0.100574	0.259529	0.0959505	0	0.127613
BTSC_BT147_L_ACGCCGAGTAAGGGAA	-8.21544	13.9458	BT147_L	BT147	GSC	0	0	0	0	0	0.110162	0.174278	0.105098	0	0.240151
BTSC_BT147_L_ACGGAGACACGCCAGT	-5.03459	12.9793	BT147_L	BT147	GSC	0	0	0	0	0.195584	0.0694396	0.158098	0.265044	0.0994875	0
BTSC_BT147_L_ACGGCCACAGATGAGC	-13.0132	15.6167	BT147_L	BT147	GSC	0	0	0	0	0	0.227027	0.253045	0.21659	0	0.123403
BTSC_BT147_L_ACGGGCTAGGCGTACA	-3.53396	12.6788	BT147_L	BT147	GSC	0	0	0	0	0	0.293067	0.0975574	0.232111	0.151794	0
BTSC_BT147_L_ACGGGCTAGGGATCTG	5.63767	16.2434	BT147_L	BT147	GSC	0	0	0	0	0	0.173002	0.116192	0.293624	0.180789	0
BTSC_BT147_L_ACGGGCTGTGATGATA	0.642033	13.6024	BT147_L	BT147	GSC	0	0	0	0	0	0.208163	0.233396	0.27907	0.125319	0.110985
BTSC_BT147_L_ACGGGTCAGACACTAA	-6.38673	6.22627	BT147_L	BT147	GSC	0.0594282	0	0	0	0	0.319576	0.273892	0.304884	0	0
BTSC_BT147_L_ACGGGTCAGTACTTGC	4.03279	16.5479	BT147_L	BT147	GSC	0	0	0	0	0	0.0922692	0.340875	0.0880274	0	0.275962
BTSC_BT147_L_ACGGGTCGTCTTCTCG	-12.3088	7.30694	BT147_L	BT147	GSC	0	0	0	0	0	0	0	0.578273	0	0
BTSC_BT147_L_ACGGGTCTCATGGTCA	0.0415567	13.123	BT147_L	BT147	GSC	0	0	0	0	0	0.204253	0.110642	0.194863	0	0
BTSC_BT147_L_ACGTCAACAAGCCATT	-9.65791	8.86347	BT147_L	BT147	GSC	0	0	0	0	0	0.205204	0.0791542	0.144835	0	0.260372
BTSC_BT147_L_ACGTCAACACGGCCAT	-6.71062	8.13057	BT147_L	BT147	GSC	0	0	0	0	0	0.38999	0.179165	0.234611	0.0731583	0.209272
BTSC_BT147_L_ACGTCAAGTCTGCAAT	-6.97325	8.26138	BT147_L	BT147	GSC	0	0	0.142274	0	0	0.265401	0	0.0886218	0	0.117866
BTSC_BT147_L_ACTATCTTCGCGATCG	-7.65689	16.1639	BT147_L	BT147	GSC	0	0	0	0	0	0.537599	0	0.448333	0	0
BTSC_BT147_L_ACTGAACTCCCTTGTG	-8.03726	6.01632	BT147_L	BT147	GSC	0.0510543	0	0	0.0865286	0.079428	0.220637	0.178515	0.15675	0	0.245989
BTSC_BT147_L_ACTGAGTCACTTCGAA	-9.30923	11.0018	BT147_L	BT147	GSC	0	0	0	0	0	0.333901	0.0969446	0	0.150841	0.307143
BTSC_BT147_L_ACTGATGCACTAGTAC	-2.6101	13.5592	BT147_L	BT147	GSC	0	0	0	0	0.203392	0.386647	0.263812	0.406379	0	0.165148
BTSC_BT147_L_ACTGATGCAGACGTAG	-6.9979	10.939	BT147_L	BT147	GSC	0	0	0	0	0.187204	0.320964	0.110309	0.306208	0	0.258484
BTSC_BT147_L_ACTGATGCAGATAATG	-0.810236	14.4301	BT147_L	BT147	GSC	0	0	0	0	0	0.0823458	0.134493	0.299025	0	0.306983
BTSC_BT147_L_ACTTACTAGCGATCCC	-9.84961	12.1822	BT147_L	BT147	GSC	0	0	0.098507	0	0.100506	0.232751	0.214318	0.25075	0	0.148066
BTSC_BT147_L_ACTTACTGTTATCACG	-11.826	2.77386	BT147_L	BT147	GSC	0	0	0	0	0	0.122545	0.677725	0.116911	0	0.346681
BTSC_BT147_L_ACTTGTTCAATCTACG	-9.06133	13.705	BT147_L	BT147	GSC	0	0	0	0	0	0.217713	0.20047	0.437493	0	0
BTSC_BT147_L_ACTTGTTTCCTAAGTG	0.803326	15.6693	BT147_L	BT147	GSC	0	0	0	0	0	0.2384	0.247626	0.194797	0.0951005	0.0842229
BTSC_BT147_L_ACTTTCAAGGCACATG	-10.2752	13.517	BT147_L	BT147	GSC	0	0	0	0	0.16896	0.340195	0.171432	0.103152	0	0.13719
BTSC_BT147_L_AGAATAGAGGACAGAA	-15.9716	12.9436	BT147_L	BT147	GSC	0	0	0	0	0	0.0616895	0.438795	0.478022	0	0.0782743
BTSC_BT147_L_AGAATAGCATTCGACA	6.00446	16.8337	BT147_L	BT147	GSC	0	0	0	0	0.168213	0	0.273071	0	0.154223	0.235307
BTSC_BT147_L_AGAATAGGTTATTCTC	-0.403673	10.4409	BT147_L	BT147	GSC	0	0	0	0	0	0	0.176835	0.0757072	0.2024	0.10069
BTSC_BT147_L_AGACGTTAGTAGGTGC	5.91031	22.1056	BT147_L	BT147	GSC	0	0	0	0	0.173592	0.190664	0.353665	0.181898	0.159155	0.241922
BTSC_BT147_L_AGAGCGAAGACAAGCC	-5.54993	12.3064	BT147_L	BT147	GSC	0	0	0	0	0	0.270136	0.274176	0.257717	0	0
BTSC_BT147_L_AGAGCGAAGAGGTTGC	-9.36438	13.9761	BT147_L	BT147	GSC	0	0	0	0	0	0	0.0824023	0.508751	0	0.113549
BTSC_BT147_L_AGAGCGATCGTACCGG	-16.0971	3.98755	BT147_L	BT147	GSC	0	0	0	0	0	0.314181	0.107151	0.111017	0	0.332752
BTSC_BT147_L_AGAGTGGGTGGTTTCA	-10.6457	19.7969	BT147_L	BT147	GSC	0	0	0	0	0	0.366992	0.39446	0.350121	0	0
BTSC_BT147_L_AGAGTGGTCAGCTCTC	2.58362	16.9766	BT147_L	BT147	GSC	0	0	0	0	0	0.552693	0.0995246	0.235863	0.266657	0.137143
BTSC_BT147_L_AGAGTGGTCCCTAATT	-8.04691	6.01018	BT147_L	BT147	GSC	0	0	0	0	0	0.181242	0.166888	0.0706417	0	0
BTSC_BT147_L_AGAGTGGTCGCCAAAT	0.982997	12.9523	BT147_L	BT147	GSC	0	0	0	0	0	0.104054	0.165723	0.0992703	0.14908	0
BTSC_BT147_L_AGATCTGGTATCAGTC	-11.0618	9.29167	BT147_L	BT147	GSC	0	0	0	0	0	0.175084	0	0.374177	0	0
BTSC_BT147_L_AGATCTGTCACCCTCA	-8.41192	7.12205	BT147_L	BT147	GSC	0	0	0	0	0	0.263572	0.0847624	0.306754	0.0712792	0.24185
BTSC_BT147_L_AGATCTGTCGTTGCCT	4.42853	14.4081	BT147_L	BT147	GSC	0	0	0	0	0	0.109868	0	0	0	0.139405
BTSC_BT147_L_AGCAGCCAGAGACTAT	-1.41622	9.79338	BT147_L	BT147	GSC	0	0	0	0	0.0998385	0.336172	0.106798	0	0.0915356	0.0810657
BTSC_BT147_L_AGCAGCCGTTGTGGCC	-5.26677	15.2851	BT147_L	BT147	GSC	0	0	0	0	0	0.244719	0.098268	0.38794	0	0.233524
BTSC_BT147_L_AGCATACAGACTACAA	2.03498	16.8832	BT147_L	BT147	GSC	0	0	0	0	0	0.108584	0.405647	0.236737	0.15557	0.137776
BTSC_BT147_L_AGCATACCAAAGGCGT	3.48418	18.9451	BT147_L	BT147	GSC	0	0	0	0	0	0	0.0841703	0.351019	0	0.115985
BTSC_BT147_L_AGCCTAATCAACCATG	-19.1323	6.40936	BT147_L	BT147	GSC	0.0572147	0	0	0	0	0.0569613	0.245065	0.410191	0.0816096	0.072275
BTSC_BT147_L_AGCGGTCAGTGGAGTC	-14.5139	8.26765	BT147_L	BT147	GSC	0	0	0	0	0	0.205232	0.214565	0.515727	0.0782913	0.260407
BTSC_BT147_L_AGCGGTCCAGGGTTAG	-10.1756	10.2787	BT147_L	BT147	GSC	0	0	0	0	0.154282	0.0987293	0.255934	0.0941904	0	0
BTSC_BT147_L_AGCGTATCAGTGGAGT	-3.37123	12.3304	BT147_L	BT147	GSC	0	0	0	0	0	0.531008	0.124764	0.129265	0	0.287716
BTSC_BT147_L_AGCGTCGTCAACACTG	6.89016	16.5751	BT147_L	BT147	GSC	0	0	0	0	0	0.148326	0	0.557811	0	0
[truncated: 64,083 more rows]
