# Supplementary material for: NF1 regulates mesenchymal glioblastoma plasticity and aggressiveness through the AP-1 transcription factor FOSL1
Source: eLife. 2021 Aug 17;10:e64846. doi: 10.7554/eLife.64846 (PMC8370767; doi:10.7554/eLife.64846)
Supplement: Figure 1—figure supplement 2—source data 1. [file elife-64846-fig1-figsupp2-data1.xlsx]

## Sheet: Figure 1-S2A
# Source Data Figure 1-figure supplement 2A
Sample	Dataset	Wang_2017	Richards_2021	FOSL1
TCGA-02-0047	TCGA	PN	INJ	-0.335977
TCGA-02-0055	TCGA	MES	INJ	2.74954
TCGA-02-2485	TCGA	CL	DEV	0.157171
TCGA-02-2486	TCGA	MES	INJ	1.38251
TCGA-06-0125	TCGA	CL	DEV	0.121273
TCGA-06-0130	TCGA	MES	INJ	1.92481
TCGA-06-0132	TCGA	MES	INJ	-0.122544
TCGA-06-0138	TCGA	MES	INJ	0.0244755
TCGA-06-0141	TCGA	MES	INJ	1.03744
TCGA-06-0157	TCGA	CL	DEV	-1.11148
TCGA-06-0158	TCGA	CL	DEV	0.101646
TCGA-06-0168	TCGA	MES	INJ	-0.818818
TCGA-06-0174	TCGA	PN	DEV	-0.186573
TCGA-06-0184	TCGA	MES	INJ	0.230182
TCGA-06-0187	TCGA	MES	INJ	1.29489
TCGA-06-0190	TCGA	MES	INJ	1.06979
TCGA-06-0210	TCGA	MES	INJ	1.92879
TCGA-06-0211	TCGA	CL	DEV	-0.345295
TCGA-06-0219	TCGA	PN	INJ	-0.111268
TCGA-06-0238	TCGA	PN	DEV	-0.8816
TCGA-06-0644	TCGA	MES	INJ	2.47182
TCGA-06-0645	TCGA	MES	INJ	0.659676
TCGA-06-0646	TCGA	MES	DEV	0.267897
TCGA-06-0649	TCGA	MES	INJ	-0.159329
TCGA-06-0686	TCGA	PN	DEV	0.398578
TCGA-06-0743	TCGA	CL	DEV	-0.177034
TCGA-06-0744	TCGA	CL	DEV	-0.142432
TCGA-06-0745	TCGA	MES	DEV	0.517205
TCGA-06-0747	TCGA	CL	DEV	1.26241
TCGA-06-0749	TCGA	PN	DEV	-0.606482
TCGA-06-0750	TCGA	MES	INJ	1.01931
TCGA-06-0878	TCGA	MES	INJ	0.897652
TCGA-06-0882	TCGA	CL	INJ	1.34266
TCGA-06-1804	TCGA	CL	DEV	-1.3779
TCGA-06-2557	TCGA	CL	DEV	-1.04217
TCGA-06-2558	TCGA	PN	DEV	-0.340389
TCGA-06-2559	TCGA	PN	DEV	0.498712
TCGA-06-2561	TCGA	CL	INJ	0.581876
TCGA-06-2562	TCGA	MES	INJ	1.45869
TCGA-06-2563	TCGA	CL	DEV	-0.0246029
TCGA-06-2564	TCGA	CL	INJ	0.204026
TCGA-06-2565	TCGA	CL	DEV	-0.182807
TCGA-06-2567	TCGA	MES	INJ	0.0552602
TCGA-06-2569	TCGA	MES	INJ	-1.24626
TCGA-06-5408	TCGA	CL	DEV	0.946018
TCGA-06-5410	TCGA	MES	INJ	1.16171
TCGA-06-5411	TCGA	PN	DEV	0.0134943
TCGA-06-5412	TCGA	MES	INJ	1.28948
TCGA-06-5413	TCGA	MES	INJ	-0.162031
TCGA-06-5414	TCGA	CL	INJ	0.766888
TCGA-06-5415	TCGA	CL	DEV	0.355794
TCGA-06-5418	TCGA	MES	INJ	0.803805
TCGA-06-5856	TCGA	PN	DEV	-0.570874
TCGA-06-5858	TCGA	MES	INJ	0.441657
TCGA-06-5859	TCGA	CL	INJ	-1.29682
TCGA-08-0386	TCGA	CL	DEV	0.620321
TCGA-12-0616	TCGA	PN	DEV	-0.358371
TCGA-12-0618	TCGA	PN	DEV	-0.0921157
TCGA-12-0619	TCGA	MES	INJ	0.942762
TCGA-12-0821	TCGA	MES	DEV	-0.346225
TCGA-12-3650	TCGA	PN	DEV	-0.956584
TCGA-12-3652	TCGA	CL	DEV	0.836038
TCGA-12-3653	TCGA	CL	DEV	-0.706497
TCGA-12-5295	TCGA	MES	INJ	-0.35373
TCGA-12-5299	TCGA	MES	INJ	1.87123
TCGA-14-0781	TCGA	MES	INJ	1.67277
TCGA-14-0787	TCGA	CL	INJ	1.3092
TCGA-14-0789	TCGA	MES	INJ	1.41434
TCGA-14-0790	TCGA	CL	DEV	-0.805243
TCGA-14-0817	TCGA	MES	INJ	-0.549901
TCGA-14-1823	TCGA	MES	INJ	-0.141394
TCGA-14-1825	TCGA	PN	DEV	-0.688248
TCGA-14-1829	TCGA	MES	INJ	-0.41569
TCGA-14-2554	TCGA	MES	INJ	0.479248
TCGA-15-0742	TCGA	CL	DEV	0.603646
TCGA-16-0846	TCGA	PN	DEV	-0.241037
TCGA-16-1045	TCGA	MES	INJ	-0.657627
TCGA-19-1390	TCGA	PN	DEV	-0.854721
TCGA-19-2619	TCGA	CL	DEV	0.854246
TCGA-19-2620	TCGA	CL	INJ	1.0131
TCGA-19-2624	TCGA	PN	DEV	0.64893
TCGA-19-2625	TCGA	MES	INJ	1.08188
TCGA-19-5960	TCGA	CL	DEV	-1.30707
TCGA-26-5132	TCGA	MES	INJ	0.764448
TCGA-26-5133	TCGA	PN	DEV	-0.668738
TCGA-26-5134	TCGA	PN	DEV	-0.506952
TCGA-26-5135	TCGA	PN	DEV	1.06267
TCGA-26-5136	TCGA	MES	INJ	0.929418
TCGA-26-5139	TCGA	MES	INJ	1.66565
TCGA-27-1830	TCGA	MES	INJ	0.128221
TCGA-27-1831	TCGA	MES	INJ	0.561914
TCGA-27-1832	TCGA	MES	INJ	1.1965
TCGA-27-1834	TCGA	PN	INJ	-0.113842
TCGA-27-1835	TCGA	CL	DEV	-0.309775
TCGA-27-1837	TCGA	PN	DEV	0.236335
TCGA-27-2519	TCGA	MES	INJ	1.12081
TCGA-27-2523	TCGA	CL	DEV	0.508635
TCGA-27-2524	TCGA	MES	INJ	2.25481
TCGA-27-2526	TCGA	CL	INJ	0.865309
TCGA-27-2528	TCGA	CL	INJ	0.679997
TCGA-28-1747	TCGA	CL	DEV	-0.356589
TCGA-28-1753	TCGA	MES	INJ	0.000247511
TCGA-28-2509	TCGA	MES	INJ	1.23428
TCGA-28-2510	TCGA	PN	DEV	-0.170596
TCGA-28-2513	TCGA	MES	INJ	0.625393
TCGA-28-2514	TCGA	CL	DEV	0.54391
TCGA-28-5204	TCGA	CL	DEV	0.13608
TCGA-28-5207	TCGA	PN	DEV	-1.75292
TCGA-28-5208	TCGA	CL	INJ	0.377151
TCGA-28-5209	TCGA	CL	DEV	-0.0948646
TCGA-28-5213	TCGA	MES	INJ	0.493135
TCGA-28-5218	TCGA	MES	INJ	-0.592575
TCGA-28-5220	TCGA	CL	DEV	-1.94093
TCGA-32-1970	TCGA	CL	DEV	-0.0658648
TCGA-32-1980	TCGA	MES	INJ	0.713651
TCGA-32-1982	TCGA	MES	INJ	-0.350647
TCGA-32-2615	TCGA	MES	INJ	1.95702
TCGA-32-2632	TCGA	MES	INJ	0.16462
TCGA-32-2634	TCGA	PN	DEV	-0.542017
TCGA-32-4213	TCGA	MES	INJ	0.441176
TCGA-32-5222	TCGA	MES	INJ	0.326174
TCGA-41-2571	TCGA	PN	DEV	0.369467
TCGA-41-2572	TCGA	CL	DEV	-0.050765
TCGA-41-3915	TCGA	MES	INJ	0.555877
TCGA-41-4097	TCGA	MES	INJ	1.30986
TCGA-41-5651	TCGA	PN	DEV	-0.937119
TCGA-76-4925	TCGA	CL	DEV	0.721163
TCGA-76-4926	TCGA	CL	DEV	0.649411
TCGA-76-4928	TCGA	MES	INJ	1.52759
TCGA-76-4929	TCGA	PN	DEV	0.156752
TCGA-76-4931	TCGA	CL	DEV	0.735215
TCGA-CS-4941	TCGA	CL	DEV	-1.1252
TCGA-CS-5395	TCGA	CL	DEV	-2.40421
TCGA-CS-5397	TCGA	CL	DEV	0.134095
TCGA-CS-6186	TCGA	CL	DEV	-0.861777
TCGA-CS-6188	TCGA	CL	INJ	0.13379
TCGA-CS-6669	TCGA	PN	DEV	-3.56857
TCGA-DB-A64O	TCGA	CL	DEV	-0.0644312
TCGA-DB-A75P	TCGA	CL	DEV	0.139641
TCGA-DH-5140	TCGA	PN	DEV	-1.33722
TCGA-DU-5847	TCGA	CL	INJ	0.124639
TCGA-DU-5852	TCGA	CL	DEV	-0.22535
TCGA-DU-5854	TCGA	CL	DEV	-0.40618
TCGA-DU-6392	TCGA	PN	DEV	0.0813065
TCGA-DU-6402	TCGA	MES	INJ	1.90517
TCGA-DU-6403	TCGA	PN	DEV	-1.86127
TCGA-DU-6404	TCGA	CL	DEV	0.505663
TCGA-DU-6405	TCGA	CL	DEV	0.135942
TCGA-DU-6406	TCGA	CL	DEV	0.106698
TCGA-DU-7006	TCGA	MES	INJ	0.68042
TCGA-DU-7012	TCGA	CL	INJ	-0.901276
TCGA-DU-7013	TCGA	CL	DEV	-1.40465
TCGA-DU-7290	TCGA	MES	INJ	0.180824
TCGA-DU-7292	TCGA	CL	DEV	-1.01394
TCGA-DU-8158	TCGA	PN	INJ	-1.06878
TCGA-DU-8161	TCGA	CL	INJ	0.202965
TCGA-DU-8162	TCGA	PN	DEV	-1.10067
TCGA-DU-8165	TCGA	MES	INJ	-1.93915
TCGA-DU-A5TT	TCGA	CL	DEV	0.11623
TCGA-DU-A5TY	TCGA	CL	INJ	-0.306847
TCGA-DU-A76K	TCGA	CL	DEV	-1.45093
TCGA-DU-A76L	TCGA	MES	INJ	0.378184
TCGA-DU-A7TB	TCGA	PN	DEV	-2.28823
TCGA-DU-A7TD	TCGA	CL	DEV	-0.726885
TCGA-DU-A7TJ	TCGA	CL	DEV	-0.472783
TCGA-E1-A7YD	TCGA	PN	DEV	-1.23939
TCGA-E1-A7YJ	TCGA	CL	DEV	0.649957
TCGA-E1-A7YL	TCGA	MES	DEV	-0.425233
TCGA-E1-A7YM	TCGA	CL	DEV	-2.78722
TCGA-E1-A7YN	TCGA	MES	INJ	0.610023
TCGA-E1-A7YQ	TCGA	MES	INJ	-0.305942
TCGA-E1-A7Z2	TCGA	CL	DEV	-0.907749
TCGA-FG-5963	TCGA	PN	DEV	-0.633605
TCGA-FG-6688	TCGA	CL	INJ	0.94802
TCGA-FG-6692	TCGA	CL	DEV	0.250128
TCGA-FG-7643	TCGA	PN	DEV	-0.159752
TCGA-FG-8181	TCGA	PN	DEV	0.068601
TCGA-FG-A4MU	TCGA	CL	DEV	0.239532
TCGA-FG-A4MW	TCGA	PN	DEV	-1.06467
TCGA-FG-A70Z	TCGA	PN	DEV	-0.681972
TCGA-FG-A87Q	TCGA	CL	DEV	-0.105289
TCGA-HT-7469	TCGA	CL	DEV	-0.383786
TCGA-HT-7680	TCGA	CL	INJ	-0.70339
TCGA-HT-7691	TCGA	CL	INJ	1.01452
TCGA-HT-7854	TCGA	CL	INJ	0.260679
TCGA-HT-7857	TCGA	MES	INJ	1.35594
TCGA-HT-7860	TCGA	CL	DEV	-0.854336
TCGA-HT-7882	TCGA	MES	INJ	2.24871
TCGA-HT-8011	TCGA	PN	DEV	-0.75358
TCGA-HT-8015	TCGA	PN	DEV	-0.731196
TCGA-HT-8019	TCGA	PN	DEV	-2.71934
TCGA-HT-8104	TCGA	CL	DEV	-0.277639
TCGA-HT-8107	TCGA	PN	DEV	-0.144058
TCGA-HT-8110	TCGA	CL	DEV	-0.919564
TCGA-HT-8558	TCGA	PN	DEV	-1.85182
TCGA-HT-8564	TCGA	PN	DEV	-1.12852
TCGA-HT-A4DS	TCGA	PN	DEV	0.280484
TCGA-HT-A5RA	TCGA	CL	INJ	0.574593
TCGA-HT-A5RC	TCGA	CL	DEV	0.416238
TCGA-HT-A617	TCGA	CL	DEV	0.256854
TCGA-HT-A61C	TCGA	PN	DEV	0.73983
TCGA-HT-A74H	TCGA	PN	DEV	-1.71776
TCGA-HW-A5KK	TCGA	CL	DEV	0.0509172
TCGA-KT-A7W1	TCGA	CL	DEV	0.729641
TCGA-P5-A5EY	TCGA	CL	DEV	-1.34874
TCGA-P5-A5F6	TCGA	MES	INJ	-0.914172
TCGA-P5-A72U	TCGA	CL	INJ	-0.270608
TCGA-QH-A6CS	TCGA	CL	DEV	-1.34919
TCGA-QH-A6CV	TCGA	CL	DEV	-0.547391
TCGA-QH-A6CX	TCGA	CL	INJ	-0.506038
TCGA-QH-A6XC	TCGA	CL	DEV	-0.0445784
TCGA-S9-A6U0	TCGA	MES	INJ	-0.245656
TCGA-S9-A6WM	TCGA	CL	DEV	-0.874373
TCGA-S9-A7IX	TCGA	CL	DEV	-0.335336
TCGA-S9-A7R2	TCGA	PN	DEV	-1.65931
TCGA-S9-A89V	TCGA	PN	DEV	-0.807516
TCGA-TM-A7C3	TCGA	CL	DEV	-0.852042
TCGA-TM-A84B	TCGA	CL	DEV	-1.96618
TCGA-TM-A84C	TCGA	MES	INJ	1.32465
TCGA-TM-A84J	TCGA	PN	DEV	-0.862304
TCGA-TQ-A7RP	TCGA	CL	DEV	-0.654873
TCGA-VM-A8C9	TCGA	PN	INJ	-0.436738
TCGA-VM-A8CD	TCGA	CL	INJ	1.64293
TCGA-VW-A8FI	TCGA	CL	DEV	0.584996
CGGA_1001	CGGA	MES	INJ	1.14265
CGGA_1002	CGGA	PN	DEV	-0.629537
CGGA_1004	CGGA	MES	INJ	-0.0592741
CGGA_1006	CGGA	MES	INJ	0.0228667
CGGA_1007	CGGA	CL	INJ	-0.462038
CGGA_1008	CGGA	CL	DEV	0.239254
CGGA_1011	CGGA	MES	INJ	1.57257
CGGA_1014	CGGA	PN	DEV	-0.0366973
CGGA_1015	CGGA	MES	INJ	1.21724
CGGA_1017	CGGA	PN	DEV	-1.68109
CGGA_1023	CGGA	CL	DEV	-0.133328
CGGA_1024	CGGA	CL	INJ	1.05645
CGGA_1026	CGGA	CL	DEV	-0.901879
CGGA_1034	CGGA	CL	INJ	0.486778
CGGA_1035	CGGA	MES	INJ	2.6884
CGGA_1036	CGGA	MES	INJ	1.0546
CGGA_1039	CGGA	CL	DEV	0.0615229
CGGA_1041	CGGA	PN	DEV	-1.39168
CGGA_1045	CGGA	MES	INJ	1.19972
CGGA_1048	CGGA	PN	DEV	0.298728
CGGA_1049	CGGA	MES	INJ	0.61343
CGGA_1053	CGGA	PN	INJ	0.358598
CGGA_1057	CGGA	MES	INJ	-0.00917923
CGGA_1070	CGGA	CL	DEV	0.314527
CGGA_1072	CGGA	CL	DEV	0.330079
CGGA_1074	CGGA	MES	INJ	0.751315
CGGA_1075	CGGA	MES	INJ	0.62353
CGGA_1077	CGGA	MES	INJ	0.969178
CGGA_1079	CGGA	CL	INJ	-0.719662
CGGA_1083	CGGA	MES	INJ	0.779929
CGGA_1091	CGGA	CL	DEV	1.33195
CGGA_1097	CGGA	CL	DEV	-0.466329
CGGA_1106	CGGA	MES	INJ	1.29687
CGGA_1108	CGGA	PN	INJ	0.162383
CGGA_1109	CGGA	CL	DEV	-0.650019
CGGA_1114	CGGA	MES	INJ	-0.2234
CGGA_1124	CGGA	MES	INJ	2.09956
CGGA_1134	CGGA	MES	INJ	2.35054
CGGA_1135	CGGA	CL	NA	0.407955
CGGA_1138	CGGA	PN	DEV	-1.10047
CGGA_1139	CGGA	CL	DEV	0.728332
CGGA_1141	CGGA	PN	DEV	-0.908568
CGGA_1142	CGGA	CL	DEV	-0.505804
CGGA_1144	CGGA	PN	DEV	-1.47119
CGGA_1152	CGGA	MES	INJ	0.349182
CGGA_1157	CGGA	CL	DEV	-1.05278
CGGA_1171	CGGA	MES	INJ	0.108422
CGGA_1180	CGGA	MES	INJ	1.20931
CGGA_1183	CGGA	CL	DEV	-0.53763
CGGA_1214	CGGA	CL	DEV	-0.639725
CGGA_1216	CGGA	CL	INJ	0.352959
CGGA_1223	CGGA	CL	DEV	0.120405
CGGA_1224	CGGA	MES	INJ	1.18596
CGGA_1226	CGGA	CL	DEV	0.0228667
CGGA_1228	CGGA	PN	DEV	-0.187035
CGGA_1234	CGGA	MES	INJ	1.07667
CGGA_1236	CGGA	PN	DEV	-0.856275
CGGA_1237	CGGA	CL	DEV	0.239254
CGGA_1238	CGGA	PN	DEV	0.324276
CGGA_1240	CGGA	MES	INJ	2.49972
CGGA_1251	CGGA	PN	DEV	-1.27833
CGGA_1258	CGGA	PN	INJ	-0.136408
CGGA_1263	CGGA	CL	DEV	-0.0339109
CGGA_1270	CGGA	MES	INJ	0.765103
CGGA_1275	CGGA	MES	INJ	2.49231
CGGA_1280	CGGA	CL	DEV	-1.42498
CGGA_1282	CGGA	CL	DEV	-0.824937
CGGA_1284	CGGA	MES	INJ	1.22354
CGGA_1292	CGGA	PN	DEV	-1.41376
CGGA_1299	CGGA	CL	INJ	0.420361
CGGA_1313	CGGA	MES	INJ	1.14859
CGGA_1319	CGGA	PN	DEV	-1.20332
CGGA_1320	CGGA	PN	DEV	-0.869093
CGGA_1332	CGGA	CL	DEV	0.377165
CGGA_1334	CGGA	CL	DEV	0.17824
CGGA_1338	CGGA	MES	INJ	0.853193
CGGA_1340	CGGA	PN	DEV	-1.89185
CGGA_1342	CGGA	MES	INJ	1.11678
CGGA_135	CGGA	MES	INJ	1.25899
CGGA_1353	CGGA	CL	INJ	-0.50134
CGGA_1354	CGGA	CL	DEV	0.556738
CGGA_1362	CGGA	PN	DEV	-1.24953
CGGA_1371	CGGA	MES	INJ	-0.022843
CGGA_1380	CGGA	PN	DEV	-0.692295
CGGA_1382	CGGA	CL	DEV	-0.843621
CGGA_1391	CGGA	PN	DEV	-0.139497
CGGA_1392	CGGA	MES	NA	0.514395
CGGA_1402	CGGA	MES	INJ	0.727039
CGGA_1403	CGGA	PN	DEV	0.496613
CGGA_1408	CGGA	CL	INJ	-1.09236
CGGA_1410	CGGA	CL	DEV	-0.970889
CGGA_1420	CGGA	PN	DEV	-0.922083
CGGA_1426	CGGA	PN	DEV	0.616327
CGGA_1433	CGGA	CL	INJ	0.82195
CGGA_1441	CGGA	MES	INJ	0.0615229
CGGA_1444	CGGA	PN	DEV	-0.395791
CGGA_1451	CGGA	MES	INJ	1.64032
CGGA_1454	CGGA	PN	DEV	-1.30798
CGGA_1457	CGGA	MES	INJ	1.05738
CGGA_1461	CGGA	CL	DEV	-0.022843
CGGA_1462	CGGA	MES	INJ	1.34454
CGGA_1476	CGGA	CL	DEV	-0.00646889
CGGA_1478	CGGA	CL	DEV	0.61343
CGGA_1500	CGGA	PN	DEV	-0.333687
CGGA_1518	CGGA	PN	DEV	-0.765079
CGGA_1521	CGGA	CL	INJ	-0.0535816
CGGA_1529	CGGA	PN	DEV	-1.27833
CGGA_1537	CGGA	CL	DEV	-0.67623
CGGA_1546	CGGA	MES	INJ	1.09916
CGGA_1548	CGGA	MES	DEV	0.226491
CGGA_1563	CGGA	MES	INJ	-0.00646889
CGGA_1564	CGGA	PN	DEV	-0.619452
CGGA_1579	CGGA	PN	DEV	-1.298
CGGA_1586	CGGA	MES	INJ	1.43984
CGGA_1588	CGGA	PN	NA	0.274549
CGGA_1596	CGGA	PN	DEV	-1.05278
CGGA_1597	CGGA	PN	INJ	0.0640472
CGGA_1598	CGGA	PN	DEV	-0.824937
CGGA_1601	CGGA	MES	INJ	0.430872
CGGA_1606	CGGA	PN	DEV	-0.747803
CGGA_1612	CGGA	MES	INJ	1.90814
CGGA_1613	CGGA	MES	INJ	1.04993
CGGA_1623	CGGA	CL	DEV	0.347288
CGGA_1626	CGGA	MES	INJ	0.494981
CGGA_1634	CGGA	PN	NA	0.886793
CGGA_1643	CGGA	PN	DEV	0.598822
CGGA_1644	CGGA	MES	NA	0.850912
CGGA_1654	CGGA	PN	DEV	0.567428
CGGA_1669	CGGA	CL	DEV	-0.949678
CGGA_1684	CGGA	MES	INJ	-0.233554
CGGA_1686	CGGA	PN	DEV	-1.69581
CGGA_1687	CGGA	MES	INJ	2.22854
CGGA_1690	CGGA	PN	DEV	0.867893
CGGA_1694	CGGA	MES	NA	-0.190286
CGGA_1698	CGGA	MES	NA	1.69696
CGGA_1704	CGGA	PN	DEV	-0.837354
CGGA_1706	CGGA	MES	INJ	1.93149
CGGA_1708	CGGA	MES	INJ	1.02916
CGGA_1709	CGGA	PN	INJ	0.0042991
CGGA_1713	CGGA	PN	DEV	-0.915303
CGGA_1715	CGGA	PN	DEV	-0.546914
CGGA_1735	CGGA	PN	DEV	-1.77285
CGGA_1736	CGGA	CL	INJ	1.1545
CGGA_1738	CGGA	PN	DEV	-0.849928
CGGA_1740	CGGA	PN	DEV	-1.27833
CGGA_1749	CGGA	CL	DEV	0.17599
CGGA_1750	CGGA	PN	DEV	-0.837354
CGGA_1758	CGGA	CL	DEV	-0.300388
CGGA_1769	CGGA	PN	DEV	-1.41376
CGGA_1807	CGGA	PN	DEV	-0.575297
CGGA_1809	CGGA	PN	DEV	-1.44782
CGGA_1812	CGGA	CL	DEV	1.60889
CGGA_1817	CGGA	CL	DEV	-0.379897
CGGA_1819	CGGA	PN	DEV	1.32984
CGGA_1826	CGGA	CL	DEV	-0.875564
CGGA_1829	CGGA	PN	DEV	-0.800559
CGGA_1833	CGGA	CL	DEV	0.561333
CGGA_1840	CGGA	PN	DEV	-1.09236
CGGA_1862	CGGA	CL	DEV	0.637782
CGGA_1866	CGGA	CL	DEV	0.425631
CGGA_1875	CGGA	PN	NA	1.68421
CGGA_1901	CGGA	MES	INJ	0.736052
CGGA_269	CGGA	CL	INJ	0.463444
CGGA_274	CGGA	MES	INJ	0.120405
CGGA_323	CGGA	PN	DEV	-0.978061
CGGA_413	CGGA	CL	INJ	-0.565745
CGGA_426	CGGA	MES	INJ	1.53372
CGGA_448	CGGA	MES	INJ	1.13753
CGGA_474	CGGA	PN	DEV	-0.806598
CGGA_483	CGGA	MES	INJ	2.78581
CGGA_488	CGGA	CL	DEV	-0.307692
CGGA_494	CGGA	PN	DEV	-0.15824
CGGA_499	CGGA	PN	DEV	0.196059
CGGA_509	CGGA	PN	DEV	-0.161399
CGGA_521	CGGA	PN	DEV	-1.19433
CGGA_525	CGGA	MES	INJ	0.460065
CGGA_541	CGGA	PN	DEV	-1.19433
CGGA_564	CGGA	CL	DEV	-0.67623
CGGA_565	CGGA	CL	DEV	-0.812673
CGGA_578	CGGA	PN	DEV	-0.882078
CGGA_599	CGGA	CL	DEV	-1.44782
CGGA_604	CGGA	MES	INJ	1.41168
CGGA_633	CGGA	PN	DEV	-1.18542
CGGA_643	CGGA	PN	DEV	-0.970889
CGGA_658	CGGA	PN	NA	-0.510289
CGGA_659	CGGA	PN	DEV	-1.20332
CGGA_661	CGGA	MES	INJ	0.616327
CGGA_676	CGGA	CL	INJ	0.318438
CGGA_679	CGGA	MES	INJ	-0.462038
CGGA_680	CGGA	PN	DEV	-1.50732
CGGA_727	CGGA	CL	DEV	-1.07634
CGGA_732	CGGA	CL	DEV	-0.304033
CGGA_782	CGGA	MES	INJ	-0.708624
CGGA_789	CGGA	MES	INJ	0.488424
CGGA_791	CGGA	PN	DEV	-0.901879
CGGA_796	CGGA	CL	DEV	-0.697708
CGGA_804	CGGA	PN	INJ	-1.35946
CGGA_807	CGGA	PN	DEV	-1.58376
CGGA_808	CGGA	PN	INJ	-0.915303
CGGA_831	CGGA	MES	INJ	0.0938496
CGGA_834	CGGA	CL	DEV	-0.329931
CGGA_837	CGGA	MES	DEV	0.515996
CGGA_842	CGGA	MES	INJ	2.04721
CGGA_848	CGGA	CL	INJ	-0.130257
CGGA_850	CGGA	CL	INJ	-0.0678745
CGGA_852	CGGA	CL	DEV	-0.765079
CGGA_859	CGGA	MES	INJ	1.76747
CGGA_861	CGGA	PN	DEV	-0.190286
CGGA_863	CGGA	PN	DEV	-1.66659
CGGA_876	CGGA	MES	INJ	1.41622
CGGA_878	CGGA	CL	INJ	0.629255
CGGA_D03	CGGA	CL	INJ	0.93934
CGGA_D09	CGGA	CL	DEV	-0.193548
CGGA_D11	CGGA	CL	INJ	0.207035
CGGA_D16	CGGA	MES	INJ	0.0790602
CGGA_D18	CGGA	PN	DEV	-1.47119
CGGA_D30	CGGA	PN	INJ	-0.0479215
CGGA_D35	CGGA	MES	INJ	1.56592
CGGA_D37	CGGA	MES	INJ	-0.300388
CGGA_D44	CGGA	CL	DEV	-0.34504
CGGA_P100	CGGA	PN	DEV	0.0790602
CGGA_P108	CGGA	PN	DEV	-1.09236
CGGA_P110	CGGA	PN	DEV	-0.604515
CGGA_P112	CGGA	PN	DEV	-1.15057
CGGA_P113	CGGA	PN	DEV	-1.51966
CGGA_P121	CGGA	PN	DEV	-1.66659
CGGA_P143	CGGA	MES	INJ	0.781155
CGGA_P155	CGGA	CL	DEV	-0.639725
CGGA_P157	CGGA	CL	DEV	-0.609469
CGGA_P159	CGGA	CL	DEV	-0.963768
CGGA_P160	CGGA	MES	INJ	0.793328
CGGA_P177	CGGA	PN	DEV	-1.21239
CGGA_P181	CGGA	PN	DEV	-1.32825
CGGA_P22	CGGA	CL	DEV	-1.41376
CGGA_P28	CGGA	CL	DEV	0.22863
CGGA_P30	CGGA	MES	INJ	-0.670932
CGGA_P31	CGGA	MES	INJ	0.952827
CGGA_P609	CGGA	PN	DEV	-0.403834

## Sheet:  Figure 1-S2B
# Source Data Figure 1-figure supplement 2B
NAME	Richards_DEV_2021_ssGSEA	Richards_INJ_2021_ssGSEA	Wang_MES_2017_ssGSEA	Wang_PN_2017_ssGSEA	Wang_CL_2017_ssGSEA	X	Y
MGH66-P08-H02	0.253342	0.168991	0.299902	0.238476	0.449146	0.486873	-0.609166
MGH66-P07-C11	0.643901	0.324301	0.341759	0.327124	0.82468	-0.917705	-0.968766
MGH66-P04-A01	0.746246	0.114642	0.24846	0.62772	0.551052	-0.625323	0.98419
MGH66-P08-H10	0.531965	0.192013	0.245148	0.242306	0.58352	-0.436382	-0.866576
MGH66-P08-E11	0.334603	0.349839	0.342371	0.195472	0.661093	-0.646743	-1.57149
MGH66-P08-D06	0.435565	0.245189	0.224428	0.35409	0.737009	-0.800704	-0.711504
MGH66-P04-B05	0.362861	0.116915	0.396402	0.27351	0.400895	-0.584362	-0.986616
MGH66-P08-C02	0.268459	0.138301	0.40561	0.317232	0.550684	0.533723	-0.818779
MGH66-P06-G01	0.286557	0.248863	0.311886	0.288785	0.494793	-0.868878	-1.41611
MGH66-P08-E02	0.204979	0.289086	0.40104	0.228472	0.560499	-0.54806	-1.72793
MGH66-P06-A01	0.241493	0.317155	0.409831	0.213785	0.654598	1.30265	-2.08866
MGH66-P03-D01	0.243741	0.160727	0.443577	0.272829	0.690202	0.034441	-1.2158
MGH66-P03-E01	0.23877	0.193729	0.347643	0.216867	0.406445	-0.509892	-1.19449
MGH66-P08-G03	0.191835	0.22451	0.380284	0.252794	0.379649	-0.394424	-1.29501
MGH66-P04-E01	0.36686	0.544932	0.609121	0.132595	0.773682	1.54244	-2.30332
MGH66-P05-H07	0.403447	0.341931	0.32471	0.191308	0.697288	-0.514473	-1.85967
MGH66-P08-H01	0.498937	0.323679	0.324145	0.235916	0.62153	-1.37615	-1.79489
MGH66-P07-G11	0.507387	0.284273	0.293151	0.101548	0.73123	-0.618898	-1.65873
MGH66-P04-H11	0.499718	0.162509	0.280871	0.330486	0.442144	1.71404	1.66542
MGH66-P07-E07	0.599906	0.4698	0.368541	0.173944	0.749026	0.546207	-1.65758
MGH66-P07-A04	0.705658	0.155071	0.268824	0.690924	0.345087	0.82006	1.36433
MGH66-P08-G11	0.54332	0.327472	0.396077	0.034445	0.702364	-1.02931	-1.59539
MGH66-P08-F11	0.693105	0.287079	0.189234	0.21128	0.849008	-1.61222	-1.53278
MGH66-P04-D11	0.553806	0.343456	0.238954	0.357653	0.693343	-0.499444	-0.925518
MGH66-P04-E05	0.475114	0.390411	0.292605	0.145106	0.691063	-0.803927	-1.30725
MGH66-P06-A12	0.52011	0.321584	0.279727	0.343098	0.763499	-1.23596	-1.26273
MGH66-P08-G06	0.51046	0.37004	0.166493	0.154971	0.799499	-0.423517	-1.78321
MGH66-P04-B01	0.476962	0.358547	0.23951	0.111773	0.691391	-1.07439	-1.75956
MGH66-P08-C11	0.572004	0.513744	0.387726	0.27025	0.733702	0.155227	-1.79002
MGH66-P04-D10	0.369594	0.27299	0.351948	0.366203	0.381017	1.21227	-1.28644
MGH66-P04-G02	0.457714	0.352214	0.28374	0.285491	0.546262	0.438234	-1.51239
MGH66-P08-D02	0.506337	0.339617	0.25589	0.22413	0.641221	-0.771073	-1.24349
MGH66-P03-A04	0.605684	0.260507	0.243075	0.338647	0.743791	-0.488297	-1.09755
MGH66-P05-C07	0.589635	0.233252	0.226225	0.521623	0.35505	-0.0594708	1.44945
MGH66-P04-G04	0.655283	0.168248	0.293232	0.759595	0.348781	-0.689751	2.09751
MGH66-P04-A03	0.476509	0.24705	0.321741	0.241404	0.589461	0.322618	-1.48878
MGH66-P05-A01	0.551433	0.27288	0.268162	0.254795	0.674202	0.460364	0.270032
MGH66-P03-A06	0.553952	0.252651	0.285481	0.272999	0.668567	-0.859192	-1.7993
MGH66-P07-D03	0.590076	0.302004	0.242664	0.148934	0.669993	-1.02102	-1.66516
MGH66-P05-C08	0.4824	0.451518	0.284787	0.249936	0.67262	0.922015	-1.83965
MGH66-P08-B03	0.503218	0.304518	0.458253	0.194275	0.472798	2.42676	-2.38303
MGH66-P05-H01	0.42242	0.383854	0.540695	0.299769	0.469334	2.09772	-1.72352
MGH66-P03-H12	0.495898	0.193071	0.317855	0.243287	0.73595	-1.02077	-1.78931
MGH66-P06-E11	0.340908	0.378229	0.514803	0.181785	0.698219	1.49864	-2.1325
MGH66-P05-G11	0.568035	0.341793	0.255277	0.158967	0.731344	-1.4137	-1.66125
MGH66-P06-D05	0.521087	0.220618	0.23935	0.342083	0.645652	-1.36436	-0.989081
MGH66-P07-B01	0.636153	0.289565	0.20702	0.335297	0.877387	-1.37401	-1.39921
MGH66-P05-B12	0.589419	0.268679	0.229452	0.36921	0.778984	-1.2438	-1.62939
MGH66-P04-B04	0.609635	0.28687	0.2131	0.305245	0.786037	-1.16614	-1.35241
MGH66-P07-A05	0.636739	0.352799	0.203949	0.323262	0.842801	-1.74194	-1.30799
MGH66-P07-B06	0.604673	0.393022	0.248407	0.266902	0.848947	-1.58319	-2.00949
MGH66-P07-D01	0.583449	0.327788	0.259227	0.334744	0.83279	-1.72958	-1.76709
MGH66-P03-F09	0.577505	0.371813	0.272011	0.309259	0.829971	-1.19384	-1.58101
MGH66-P08-D11	0.687933	0.40074	0.348558	0.229347	0.785447	-1.14186	-1.01484
MGH66-P06-B02	0.478243	0.376703	0.326829	0.452689	0.648826	-0.585866	-1.13675
MGH66-P08-A02	0.495647	0.348896	0.23247	0.267493	0.771557	-0.644349	-1.60932
MGH66-P05-B06	0.455657	0.290809	0.351763	0.294993	0.737894	-0.0206213	-1.06498
MGH66-P08-A04	0.543152	0.405732	0.436097	0.238061	0.830472	0.396486	-1.68238
MGH66-P03-C10	0.607613	0.261066	0.339779	0.179186	0.658155	-0.667665	-1.57291
MGH66-P07-F07	0.510993	0.174095	0.272446	0.251112	0.569005	-1.16973	-1.15648
MGH66-P06-A09	0.346482	0.383397	0.438412	0.25961	0.403103	2.58131	-2.35588
MGH66-P07-H07	0.328645	0.225175	0.260379	0.29378	0.55766	-0.534836	-1.60157
MGH66-P08-E12	0.373839	0.205373	0.292615	0.316425	0.566648	0.793098	-1.13156
MGH66-P07-H04	0.21216	0.17099	0.318889	0.355963	0.505643	-0.218831	-0.757235
MGH66-P06-B01	0.36968	0.0919833	0.285985	0.396295	0.408511	0.944616	1.3305
MGH66-P05-C12	0.401127	0.0878139	0.319456	0.363963	0.504301	1.48976	1.41682
MGH66-P03-B09	0.480575	0.131156	0.248211	0.330238	0.448363	0.442162	1.41477
MGH66-P05-A05	0.435521	0.331534	0.20746	0.319017	0.672348	-1.28065	-1.85068
MGH66-P03-G07	0.542476	0.199439	0.217871	0.300466	0.855278	-0.776614	-1.50527
MGH66-P05-F01	0.479686	0.357764	0.274809	0.198184	0.779635	-0.811355	-1.71556
MGH66-P05-E03	0.442386	0.371397	0.408214	0.336074	0.727614	0.215819	-1.42713
MGH66-P06-E07	0.487865	0.357459	0.291766	0.279207	0.642304	-1.19594	-1.45137
MGH66-P07-C07	0.655925	0.087247	0.247339	0.434787	0.459555	1.13683	1.49557
MGH66-P03-C03	0.374299	0.524489	0.444338	0.148778	0.607307	1.87059	-2.13443
MGH66-P06-D11	0.0767875	0.307836	0.32394	0.294691	0.420223	0.550331	-1.70986
MGH66-P03-E03	0.59892	0.382141	0.223808	0.283028	0.837183	-0.065871	-1.25688
MGH66-P05-C10	0.408171	0.294132	0.43182	0.192914	0.580257	-0.490661	-1.13299
MGH66-P04-G08	0.416383	0.40472	0.267782	0.16336	0.695085	-0.255919	-1.31789
MGH66-P08-F02	0.500076	0.0893428	0.254204	0.481684	0.557799	1.51562	1.2135
MGH66-P04-B12	0.382635	0.339627	0.487818	0.283747	0.431169	1.78202	-2.29754
MGH66-P03-D04	0.604381	0.318794	0.184624	0.403094	0.862426	-1.31748	-1.26258
MGH66-P03-F05	0.62629	0.298477	0.212492	0.241608	0.843261	-1.52957	-1.7166
MGH66-P08-A07	0.420758	0.274782	0.210148	0.200827	0.670187	-1.35981	-1.4616
MGH66-P04-E09	0.529368	0.212215	0.280326	0.455934	0.494394	1.83764	1.52929
MGH66-P04-A10	0.519635	0.215454	0.21629	0.46873	0.465237	1.73771	1.15333
MGH66-P07-B05	0.642568	0.326126	0.191602	0.372101	0.761562	-0.802321	-1.04062
MGH66-P03-E06	0.530712	0.481678	0.252445	0.315957	0.586176	1.1357	-1.18871
MGH66-P04-A05	0.40784	0.3093	0.435118	0.230797	0.58386	-0.0289454	-1.56284
MGH66-P04-D12	0.576933	0.195826	0.233212	0.383713	0.417648	1.29474	1.31243
MGH66-P05-C04	0.474682	0.357004	0.218463	0.212416	0.840056	0.04209	-1.16085
MGH66-P07-D02	0.609861	0.154485	0.143613	0.511132	0.605458	1.51053	1.4508
MGH66-P06-B07	0.582502	0.234968	0.15067	0.411212	0.74656	0.028091	-0.53702
MGH66-P07-E04	0.593053	0.22063	0.178017	0.381918	0.32496	1.73208	1.36008
MGH66-P03-B05	0.645337	0.31541	0.254172	0.107534	0.773844	0.346758	-1.84101
MGH66-P04-G01	0.420454	0.273172	0.322601	0.316087	0.608023	-0.819008	-1.6441
MGH66-P03-H05	0.387212	0.501645	0.488793	0.345389	0.646257	1.87443	-1.96436
MGH66-P04-G03	0.551496	0.291543	0.223503	0.371713	0.569567	-0.285186	-1.27714
MGH66-P08-E07	0.592658	0.225963	0.31581	0.514234	0.385749	-0.779518	1.66195
MGH66-P03-H06	0.659283	0.317878	0.215197	0.30735	0.646382	0.690367	-0.517789
MGH66-P04-E06	0.552495	0.373202	0.196192	0.30332	0.692372	-1.24955	-1.38205
MGH66-P08-D12	0.436336	0.360915	0.337093	0.170709	0.706045	0.503128	-1.6452
MGH66-P03-C02	0.66533	0.309617	0.121745	0.0489372	0.733605	-1.02173	-1.23225
MGH66-P07-H06	0.56957	0.220708	0.422084	0.417358	0.354764	0.663067	1.10307
MGH66-P04-F02	0.613643	0.363603	0.183802	0.277125	0.741619	-0.853884	-1.08698
MGH66-P06-C05	0.556914	0.388787	0.282758	0.350334	0.79329	0.221369	-1.38559
MGH66-P06-C08	0.501566	0.34516	0.173381	0.116236	0.614764	-0.47943	-0.969755
MGH66-P05-G09	0.581597	0.295101	0.302879	0.306754	0.664189	0.141012	-1.30768
MGH66-P06-E02	0.589654	0.229304	0.204375	0.523239	0.663907	1.24389	1.1847
MGH66-P06-A04	0.53534	0.387211	0.395018	0.106363	0.763397	1.03261	-1.8892
MGH66-P04-B08	0.468246	0.287932	0.273284	0.14213	0.575941	-0.64035	-0.819096
MGH66-P07-G12	0.499965	0.33622	0.257515	0.269758	0.499365	0.583225	0.497983
MGH66-P07-G07	0.490433	0.174004	0.363462	0.287794	0.582152	-0.874121	-0.929303
MGH66-P06-A08	0.658416	0.207185	0.177344	0.456309	0.833137	-1.07785	-1.1345
MGH66-P07-G10	0.507036	0.159889	0.270163	0.625433	0.259384	0.0512425	1.16716
MGH66-P07-D06	0.454958	0.313868	0.324576	0.198124	0.545204	-0.147877	-0.922285
MGH66-P04-E08	0.538698	0.194702	0.373303	0.362496	0.744644	-1.47734	-1.53133
MGH66-P06-F05	0.592389	0.389363	0.329486	0.282013	0.782055	0.981045	-1.25831
MGH66-P06-G08	0.365733	0.283909	0.380435	0.31109	0.430716	2.21119	-2.14534
MGH66-P03-B03	0.332873	0.428	0.596012	0.271899	0.314904	2.59144	-2.47428
MGH66-P05-D04	0.555653	0.285985	0.201668	0.164035	0.753699	0.709734	-1.71699
MGH66-P04-H02	0.545192	0.448089	0.429703	0.142529	0.698433	1.05652	-2.13859
MGH66-P08-B09	0.57197	0.344082	0.304499	0.130162	0.615274	-1.01985	-1.63941
MGH66-P06-E01	0.457169	0.386804	0.378217	0.342018	0.641662	0.511189	-0.888682
MGH66-P05-E09	0.338865	0.0972211	0.364526	0.378623	0.524374	-1.69527	-0.645957
MGH66-P07-H10	0.593579	0.060284	0.299142	0.495922	0.41831	1.54481	1.60413
MGH66-P03-B04	0.631371	0.351861	0.259297	0.254699	0.836132	-1.56798	-1.80952
MGH66-P04-C05	0.417134	0.427872	0.442097	0.234963	0.566152	1.14123	-2.16426
MGH66-P08-H08	0.695195	0.23296	0.209775	0.58503	0.577645	0.42785	0.120331
MGH66-P05-B08	0.549045	0.279056	0.307517	0.2429	0.70124	0.536434	-1.71252
MGH66-P04-C10	0.482821	0.323828	0.332889	0.173943	0.614496	-1.22252	-1.80852
MGH66-P06-G06	0.477605	0.257889	0.258664	0.275041	0.721481	-0.875615	-1.94356
MGH66-P05-G12	0.569551	0.399302	0.299327	0.348964	0.774811	-0.386916	-1.46922
MGH66-P07-C10	0.518751	0.263443	0.363868	0.256316	0.635411	-1.47542	-1.34504
MGH66-P04-A06	0.473658	0.362007	0.381625	0.264	0.686248	1.71847	-1.87736
MGH66-P07-B08	0.412424	0.490907	0.556034	0.228691	0.68986	1.79227	-2.38725
MGH66-P03-A03	0.636105	0.20164	0.298131	0.381604	0.644799	0.383968	0.0366171
MGH66-P05-F10	0.503211	0.477325	0.358279	0.188108	0.863422	0.135737	-1.39707
MGH66-P03-F06	0.550049	0.449546	0.340119	0.113309	0.813258	0.273082	-1.64812
MGH66-P03-B11	0.723586	0.171475	0.204974	0.652299	0.380151	-0.647698	1.4748
MGH66-P05-C03	0.611464	0.286443	0.269716	0.174815	0.848705	-1.34197	-1.64043
MGH66-P03-G02	0.484706	0.324904	0.25413	0.336901	0.546439	1.01563	0.279699
MGH66-P04-B09	0.406652	0.421605	0.185282	0.18488	0.75058	-0.376151	-1.49339
MGH66-P06-G11	0.450991	0.377626	0.25997	0.101421	0.761076	-0.132707	-1.25215
MGH66-P05-F03	0.585531	0.31285	0.191548	0.226336	0.850048	-1.36506	-1.35812
MGH66-P07-C04	0.707993	0.105213	0.182433	0.595098	0.826309	1.25187	1.08031
MGH66-P07-C05	0.627663	0.288223	0.246197	0.269443	0.825116	-1.56173	-1.51884
MGH66-P04-F04	0.533295	0.24888	0.317908	0.357194	0.756516	-1.5117	-1.77926
MGH66-P03-D10	0.484039	0.256888	0.384538	0.37928	0.746854	-0.325828	-1.47528
MGH66-P06-A03	0.476453	0.423659	0.34973	0.368089	0.610265	0.654879	-1.3498
MGH66-P08-G01	0.575231	0.432567	0.29831	0.266324	0.792054	-0.935352	-1.14673
MGH66-P06-H02	0.594934	0.214218	0.193375	0.264766	0.770734	-1.59223	-1.14324
MGH66-P04-A12	0.62827	0.258963	0.248978	0.151256	0.752809	-1.61331	-1.61583
MGH66-P07-D08	0.633335	0.268757	0.238878	0.269839	0.744368	-0.923499	-0.277769
MGH66-P07-D10	0.430154	0.280056	0.2892	0.148467	0.583257	0.633814	-1.88598
MGH66-P07-E11	0.667662	0.200089	0.195604	0.19689	0.68862	-1.70214	-1.53064
MGH66-P08-C03	0.692771	0.248211	0.168076	0.237044	0.755318	-1.08863	-1.31988
MGH66-P03-G04	0.496796	0.329362	0.321644	0.278614	0.80149	-0.637799	-1.77994
MGH66-P06-C01	0.471042	0.175433	0.34508	0.300749	0.698892	-1.12508	-1.35482
MGH66-P04-H04	0.503398	0.345538	0.285948	0.22985	0.776382	-0.776231	-1.47408
MGH66-P08-E08	0.555432	0.34854	0.307655	0.368416	0.718228	0.382322	-1.29141
MGH66-P06-B10	0.574656	0.291312	0.209513	0.372237	0.741618	-1.6303	-0.980263
MGH66-P07-B10	0.559031	0.257686	0.194914	0.139856	0.750909	-1.4932	-1.40593
MGH66-P05-H02	0.555871	0.292138	0.265303	0.45449	0.72427	-1.35707	-0.801332
MGH66-P05-E01	0.609769	0.392992	0.284857	0.132763	0.656918	1.11504	-2.03044
MGH66-P08-E09	0.612423	0.380013	0.270048	0.243714	0.68796	-0.780373	-1.43927
MGH66-P07-F09	0.601269	0.187838	0.259664	0.373127	0.683753	0.784428	0.199176
MGH66-P08-C05	0.594591	0.222172	0.226229	0.332503	0.574527	1.03368	0.930945
MGH66-P06-C02	0.581986	0.26005	0.25676	0.177707	0.826816	-1.32569	-1.62551
MGH66-P05-H04	0.621722	0.333438	0.231284	0.238458	0.813278	1.19858	0.251446
MGH66-P04-C09	0.544051	0.389081	0.259062	0.173077	0.732342	-0.975277	-1.78906
MGH66-P03-A09	0.520034	0.492142	0.334849	0.117228	0.857117	0.0761981	-1.64486
MGH66-P04-D04	0.407817	0.294275	0.290108	0.27585	0.576043	0.696759	-1.5193
MGH66-P03-H01	0.471739	0.502101	0.252091	0.285523	0.717958	0.757574	-1.52868
MGH66-P03-D08	0.580887	0.407513	0.222235	0.25918	0.72738	-1.16426	-1.7411
MGH66-P03-B12	0.568287	0.419012	0.305741	0.317998	0.609015	-0.416551	-1.07179
MGH66-P04-F09	0.421606	0.37164	0.310721	0.324505	0.702461	-0.890171	-1.60142
MGH66-P04-C04	0.454011	0.398639	0.352649	0.385165	0.746714	-0.260666	-1.25511
MGH66-P03-H08	0.563858	0.333894	0.113992	0.22068	0.646887	-1.23765	-1.8198
MGH66-P07-D11	0.358886	0.330958	0.358942	0.350477	0.672073	1.00955	-1.50141
MGH66-P07-C12	0.588854	0.430641	0.267136	0.246473	0.838093	-0.907093	-1.27927
MGH66-P05-H06	0.519321	0.354279	0.306608	0.0734483	0.696508	-1.2075	-1.78132
MGH66-P04-D01	0.530152	0.377214	0.0974514	0.357706	0.782599	-0.210743	-1.36713
MGH66-P06-F08	0.446235	0.416354	0.329083	0.14385	0.764631	-0.188801	-1.31256
MGH66-P03-F10	0.58069	0.291028	0.140504	0.121624	0.752458	-1.36191	-1.53185
MGH66-P06-F07	0.636229	0.249699	0.242848	0.208658	0.660176	-1.08302	-0.793993
MGH66-P05-G05	0.521703	0.427754	0.389394	0.170768	0.855083	-0.735418	-1.61339
MGH66-P05-A09	0.565712	0.295515	0.211913	0.330187	0.938698	-0.969941	-1.06945
MGH66-P03-H03	0.522124	0.431681	0.214587	0.352583	0.782048	-0.88521	-1.63548
MGH66-P05-G02	0.469609	0.438565	0.407691	0.302843	0.79834	0.364827	-1.55753
MGH66-P07-A10	0.494142	0.525214	0.365308	0.34784	0.781701	0.665263	-1.29076
MGH66-P08-F03	0.464389	0.274148	0.17709	0.32025	0.614296	0.625428	-1.26368
MGH66-P08-G10	0.572009	0.401756	0.236416	0.165148	0.739932	0.16061	-1.8405
MGH66-P04-B03	0.519505	0.217644	0.276042	0.30508	0.678932	-0.907661	-0.838475
MGH66-P03-E05	0.497214	0.576889	0.427602	0.143722	0.817242	1.32423	-2.34588
MGH66-P06-D02	0.563522	0.368513	0.250384	0.292284	0.740992	-1.2642	-1.68721
MGH66-P04-F01	0.572725	0.380999	0.235314	0.372638	0.71119	-0.855297	-0.711163
MGH66-P03-C05	0.551753	0.478539	0.332038	0.266679	0.815716	0.496551	-1.74231
MGH66-P04-B02	0.533348	0.321009	0.302729	0.216571	0.722731	-0.573851	-1.62054
MGH66-P06-A07	0.553589	0.372005	0.233582	0.267779	0.769168	-1.14552	-1.80154
MGH66-P05-D05	0.597828	0.421201	0.253672	0.207031	0.786984	-0.683254	-1.13162
MGH66-P03-D12	0.57795	0.409823	0.280144	0.0864518	0.875797	-1.09562	-1.71722
MGH66-P05-G08	0.539493	0.308483	0.248778	0.167022	0.806121	-0.441162	-1.83544
MGH66-P04-A11	0.489195	0.230549	0.373259	0.320596	0.581633	-1.2153	-1.49358
MGH66-P04-A07	0.569986	0.311287	0.269223	0.306543	0.785651	-1.06993	-1.43143
MGH66-P04-H12	0.582141	0.320633	0.269878	0.275547	0.671916	-0.463277	-1.09806
MGH66-P03-D07	0.704109	0.410548	0.280008	0.130693	0.649737	-0.588333	-1.47413
MGH66-P06-E04	0.659979	0.348181	0.27653	0.366778	0.754302	-0.405011	-1.19212
MGH66-P07-C02	0.694925	0.303908	0.248713	0.151329	0.724663	-1.18502	-1.60295
MGH66-P06-E05	0.561041	0.416917	0.174113	0.223078	0.870698	-1.19952	-1.65516
MGH66-P08-E04	0.499067	0.374222	0.364576	0.281431	0.695424	0.00145552	-1.49644
MGH66-P07-A07	0.528319	0.381392	0.291432	0.183014	0.792569	0.0661356	-1.26349
MGH66-P06-G10	0.708578	0.198337	0.206826	0.320483	0.607906	-0.937281	-0.462703
MGH66-P06-G05	0.558887	0.257242	0.25702	0.253752	0.621344	-1.08	-1.61526
MGH66-P06-B12	0.786592	0.179205	0.186287	0.85264	0.662788	-1.1584	1.69878
MGH66-P05-B04	0.542508	0.47345	0.254757	0.186858	0.694337	0.574613	-1.29968
MGH66-P03-B07	0.618024	0.433146	0.251992	0.266956	0.70694	-0.963717	-1.40223
MGH66-P06-A06	0.68571	0.39761	0.227348	0.362372	0.794691	-1.16293	-1.57814
MGH66-P08-F10	0.467857	0.358586	0.441727	0.319394	0.666828	-1.1003	-1.51585
MGH66-P07-F01	0.576448	0.319691	0.210554	0.187499	0.829107	-1.19677	-1.60385
MGH66-P05-G06	0.659876	0.28205	0.214148	0.161781	0.885407	-1.30235	-1.34224
MGH66-P06-E09	0.443454	0.414672	0.274177	0.148102	0.811873	0.594955	-1.95297
MGH66-P03-C12	0.551779	0.391392	0.302113	0.213942	0.753738	0.08484	-1.78317
MGH66-P07-B04	0.666084	0.411133	0.213221	0.343559	0.748492	-0.230819	-1.2101
MGH66-P05-A07	0.615443	0.279571	0.214617	0.350352	0.580902	-1.10515	-0.875762
MGH66-P07-A06	0.680901	0.334158	0.146896	0.214372	0.862921	-1.19248	-1.40437
MGH66-P05-C09	0.559906	0.325465	0.150276	0.223254	0.655262	-0.261849	-1.10486
MGH66-P03-D03	0.669705	0.40728	0.33351	0.160296	0.709316	-0.704538	-1.4366
MGH66-P07-E05	0.625466	0.373286	0.182479	0.149759	0.780938	-0.389002	-1.58764
MGH66-P04-F05	0.548975	0.420417	0.181734	0.152111	0.745825	0.0797031	-1.32957
MGH66-P06-C12	0.487898	0.405807	0.311119	0.13542	0.844633	0.754958	-1.86896
MGH66-P08-D10	0.643824	0.248615	0.296551	0.3181	0.66438	-1.01832	-0.858513
MGH66-P03-D02	0.609854	0.308946	0.276738	0.333566	0.813079	-1.45641	-1.5497
MGH66-P07-C03	0.59381	0.403456	0.20236	0.262435	0.875965	-0.966405	-1.54793
MGH66-P06-D03	0.654484	0.244023	0.176622	0.480775	0.759483	-0.732179	-0.878909
MGH66-P03-E08	0.516419	0.403835	0.283895	0.334371	0.750606	-0.642153	-1.28701
MGH66-P06-A10	0.615116	0.398174	0.205165	0.324846	0.837434	-0.0231139	-1.11129
MGH66-P05-G07	0.573237	0.332214	0.238085	0.0517464	0.736383	-1.14903	-1.50921
MGH66-P06-G04	0.622719	0.350093	0.273504	0.234596	0.855162	-0.884814	-1.39809
MGH66-P04-H07	0.508787	0.240518	0.364987	0.336689	0.63008	-0.66392	-1.21766
MGH66-P05-E07	0.583731	0.392982	0.276631	0.270777	0.785015	-0.0393	-1.00488
MGH66-P05-F09	0.665209	0.351448	0.187159	0.310899	0.783545	0.19657	-1.10974
MGH66-P04-H01	0.539997	0.562029	0.269763	0.168476	0.80702	0.465795	-1.71763
MGH66-P03-D05	0.592985	0.343283	0.140964	0.378089	0.737673	-1.07335	-1.25436
MGH66-P07-B02	0.518418	0.394441	0.360195	0.291843	0.64023	1.04044	-1.41452
MGH66-P06-F12	0.519815	0.370708	0.292828	0.160651	0.748253	-1.21543	-1.65788
MGH66-P08-C01	0.682902	0.199629	0.136201	0.436222	0.798399	-1.40768	-0.977346
MGH66-P07-B07	0.561539	0.4263	0.296246	0.199995	0.81511	-1.07998	-1.51681
MGH66-P03-E07	0.505727	0.442132	0.178489	0.374099	0.85432	-0.459377	-1.32463
MGH66-P07-A08	0.538296	0.177911	0.245208	0.286385	0.716027	0.835213	0.409347
MGH66-P05-B07	0.694891	0.34473	0.379684	0.262519	0.857223	-1.423	-1.64957
MGH66-P03-E12	0.48958	0.319115	0.255216	0.340819	0.61214	0.955007	-1.16559
MGH66-P05-E10	0.711535	0.219155	0.215485	0.579538	0.664981	1.19003	1.14858
MGH66-P05-F05	0.612651	0.1881	0.272131	0.441601	0.373909	0.960936	1.29249
MGH66-P05-C06	0.583652	0.302533	0.183314	0.408347	0.597933	1.01602	0.351541
MGH66-P06-F10	0.606608	0.224877	0.278924	0.443272	0.652353	1.0727	1.05646
MGH66-P03-B02	0.726702	0.342336	0.302937	0.380291	0.815278	-0.581152	-1.15226
MGH66-P03-C08	0.596419	0.290628	0.286073	0.352671	0.658552	0.463291	-0.907481
MGH66-P06-D07	0.80283	0.303536	0.108721	0.282882	0.798345	-1.40304	-1.33964
MGH66-P06-A02	0.642424	0.329714	0.287478	0.368552	0.825142	-0.450879	-1.08822
MGH66-P06-C07	0.644367	0.299925	0.214639	0.261353	0.755357	-0.313302	-0.720135
MGH66-P05-F02	0.645048	0.267204	0.214469	0.345264	0.783849	-1.50863	-1.5294
MGH66-P05-D12	0.535102	0.370307	0.195632	0.324308	0.762492	0.0537918	-1.02328
MGH66-P03-A01	0.544544	0.431048	0.234574	0.347155	0.789938	-0.752989	-1.47044
MGH66-P06-F01	0.569479	0.326506	0.242914	0.310297	0.833781	-0.592119	-1.26593
MGH66-P06-A05	0.530571	0.336894	0.241036	0.191968	0.682908	-0.460262	-1.31554
MGH66-P06-H09	0.614861	0.348622	0.230151	0.50873	0.827722	-0.774097	-1.35826
MGH66-P06-D01	0.580361	0.262467	0.190093	0.165677	0.792914	-1.21676	-1.21257
MGH66-P07-E01	0.636217	0.352637	0.313907	0.214571	0.723826	-1.03879	-1.87049
MGH66-P07-H02	0.411836	0.412379	0.360948	0.358465	0.720953	-0.0484994	-1.35482
MGH66-P08-D08	0.566185	0.350435	0.360067	0.319413	0.631074	0.387092	-0.785572
MGH66-P07-B09	0.738897	0.186636	0.22939	0.696328	0.54148	-0.276536	1.42203
MGH66-P08-B05	0.649579	0.257896	0.17475	0.307819	0.847643	-1.28843	-1.45518
MGH66-P06-B11	0.505112	0.359803	0.287343	0.228381	0.77344	-1.30345	-1.88908
MGH66-P05-D06	0.627016	0.278219	0.303584	0.414353	0.893342	-0.878959	-1.14752
MGH66-P05-F11	0.49449	0.41077	0.274773	0.372083	0.795282	-0.393837	-0.988058
MGH66-P06-B04	0.544913	0.292607	0.333325	0.266667	0.694336	-1.27233	-0.943959
MGH66-P06-G07	0.620472	0.265007	0.211219	0.267003	0.830994	-0.685205	-1.21183
MGH66-P08-F05	0.52581	0.415311	0.312766	0.230851	0.854943	-0.462153	-1.55861
MGH66-P07-G09	0.585494	0.361597	0.268501	0.1882	0.893828	-0.959537	-1.59872
MGH66-P03-E09	0.469497	0.288627	0.262088	0.195836	0.744121	-1.18223	-1.62523
MGH66-P07-F06	0.616422	0.184094	0.326408	0.478669	0.480086	1.10331	0.843809
MGH66-P06-H03	0.491282	0.239801	0.304743	0.465291	0.720266	0.898801	0.0400821
MGH66-P07-H03	0.447115	0.349321	0.330139	0.394722	0.759835	-0.286098	-0.928776
MGH66-P03-G05	0.626203	0.350635	0.274777	0.224139	0.816442	-0.848207	-1.06041
MGH66-P03-F02	0.603672	0.317026	0.22823	0.236184	0.865084	-1.32154	-1.64095
MGH66-P06-H10	0.557229	0.325867	0.343159	0.34619	0.779269	-0.963818	-1.32648
MGH66-P07-A11	0.62286	0.416	0.264457	0.206127	0.716847	-1.03174	-1.4978
MGH66-P03-H11	0.644224	0.33708	0.219802	0.181426	0.800923	-1.19243	-1.05612
MGH66-P04-F11	0.612663	0.396833	0.405017	0.348855	0.722834	-0.598557	-1.51032
MGH66-P08-C12	0.626228	0.46796	0.351309	0.243249	0.834871	-0.282888	-1.55271
MGH66-P04-E07	0.291035	0.191311	0.324392	0.259608	0.518509	-1.69897	-1.63077
MGH66-P08-E05	0.552078	0.40602	0.192319	0.396824	0.7751	0.425073	-1.03164
MGH66-P04-D06	0.519611	0.317399	0.286993	0.328685	0.821561	-0.633809	-1.63529
MGH66-P03-A08	0.597927	0.285263	0.239324	0.152369	0.857909	-1.44665	-1.5769
MGH66-P04-H09	0.526633	0.330557	0.289985	0.237155	0.776255	-0.538495	-1.15566
MGH66-P05-E11	0.6568	0.318979	0.187832	0.318249	0.898248	-1.65603	-1.62761
MGH66-P05-H09	0.608208	0.30207	0.326847	0.161603	0.870267	-1.47331	-1.62187
MGH66-P08-G04	0.519023	0.475197	0.368573	0.373806	0.825171	-0.0720049	-1.27369
MGH66-P08-B12	0.501189	0.286994	0.379515	0.161917	0.770107	-0.600225	-1.29275
MGH66-P03-G10	0.562499	0.360289	0.247792	0.186821	0.78358	-1.58255	-1.52923
MGH66-P05-G10	0.613887	0.320508	0.190556	0.265782	0.73314	-0.836783	-1.10168
MGH66-P08-D04	0.54901	0.417424	0.231258	0.16173	0.888445	-0.527264	-1.25575
MGH66-P04-B10	0.395416	0.425116	0.299313	0.195632	0.730242	0.00223428	-1.5734
MGH66-P04-H05	0.505632	0.334664	0.293197	0.229851	0.678895	-1.06395	-1.51418
MGH66-P04-B07	0.497391	0.360539	0.33497	0.289101	0.729238	-0.613668	-1.54583
MGH66-P06-D08	0.50058	0.307099	0.290023	0.161828	0.761446	-0.855486	-1.5426
MGH66-P04-E03	0.529417	0.282341	0.2579	0.121646	0.682674	-1.08242	-1.5012
MGH66-P07-E12	0.599647	0.312509	0.324669	0.249665	0.64243	1.44314	1.02805
MGH66-P03-H02	0.521834	0.416396	0.243407	0.10968	0.742469	-0.71704	-1.51537
MGH66-P05-E05	0.595713	0.259161	0.23784	0.204852	0.723868	-1.15605	-1.31523
MGH66-P04-G12	0.5369	0.292431	0.260743	0.321001	0.726997	-0.883552	-1.42351
MGH66-P04-D07	0.33388	0.442374	0.679401	0.163323	0.500861	1.68587	-2.28911
MGH66-P04-F06	0.53632	0.396994	0.252131	0.215899	0.618248	1.04507	-1.61523
MGH66-P06-E10	0.730386	0.321798	0.209339	0.240729	0.785032	-0.981748	-1.13453
MGH66-P06-B08	0.542671	0.447772	0.270771	0.16506	0.854879	-1.05963	-1.72259
MGH66-P05-D09	0.657929	0.241487	0.238428	0.314267	0.488739	0.821291	0.347717
MGH66-P06-F03	0.494145	0.255233	0.249633	0.230035	0.607979	-0.72964	-1.8211
MGH66-P03-A12	0.429072	0.653758	0.589326	0.169598	0.654636	1.78912	-2.36289
MGH66-P08-C07	0.375124	0.406606	0.461169	0.243668	0.646071	1.32695	-1.7595
MGH66-P03-H04	0.489414	0.571499	0.682535	0.223898	0.435108	2.45337	-2.20082
MGH66-P04-B06	0.50778	0.339376	0.31999	0.143569	0.648777	1.197	-1.24873
MGH66-P03-E10	0.485106	0.375309	0.33504	0.132601	0.63251	-0.346708	-1.4949
MGH66-P06-F04	0.55504	0.362278	0.332928	0.134326	0.743922	-0.819928	-1.95171
MGH66-P06-D09	0.389284	0.360656	0.264251	0.109403	0.462831	0.864066	-1.45025
MGH66-P05-C05	0.554176	0.289978	0.247849	0.291583	0.813109	-1.38839	-1.84591
MGH66-P07-E09	0.510514	0.387843	0.31972	0.270991	0.630307	1.00689	-2.08741
MGH66-P07-G06	0.658413	0.325729	0.242553	0.17668	0.828345	-1.35745	-1.44965
MGH66-P07-F04	0.495755	0.432138	0.331587	0.0837041	0.764681	0.576851	-1.9726
MGH66-P03-B06	0.470897	0.397674	0.444657	0.207091	0.642327	0.706754	-1.81968
MGH66-P05-D08	0.642587	0.386432	0.293085	0.220097	0.872344	-0.962475	-1.85325
MGH66-P06-B09	0.194978	0.3159	0.494195	0.244197	0.465136	1.88235	-1.98984
MGH66-P06-C09	0.680335	0.122815	0.153571	0.368197	0.396698	1.45224	0.263189
MGH66-P04-G07	0.287705	0.516483	0.758907	0.159577	0.389634	2.27302	-2.35609
MGH66-P08-H11	0.551589	0.251723	0.274708	0.179722	0.78201	0.153451	-1.02669
MGH66-P08-B07	0.64088	0.189103	0.322914	0.269336	0.612801	-1.42375	-1.10621
MGH66-P07-D12	0.493377	0.546863	0.420893	0.142526	0.65729	1.76142	-2.09314
MGH66-P05-B02	0.481568	0.264634	0.283186	0.348046	0.632163	-1.07529	-1.56399
MGH66-P04-C06	0.567093	0.273805	0.226235	0.0421416	0.799243	-1.28316	-2.0267
MGH66-P06-G12	0.507767	0.255865	0.332112	0.393754	0.73009	0.396108	-0.851456
MGH66-P03-A11	0.309367	0.55984	0.582359	0.212301	0.595662	1.69293	-2.3236
MGH66-P05-H03	0.501303	0.366507	0.322844	0.239037	0.727946	-0.0677906	-1.89367
MGH66-P04-H06	0.501694	0.298879	0.238652	0.231501	0.669547	-0.656729	-1.57496
MGH66-P07-A02	0.540134	0.393171	0.407414	0.382805	0.774358	-0.990517	-1.40697
MGH66-P08-F06	0.4965	0.157094	0.275653	0.319916	0.590711	0.0664719	0.321602
MGH66-P03-A05	0.631073	0.25401	0.301917	0.548342	0.719929	-0.886838	0.423844
MGH66-P07-B03	0.633723	0.224877	0.218847	0.53162	0.539714	-0.778251	0.402786
MGH66-P03-D06	0.485639	0.125908	0.347387	0.298407	0.626201	1.01767	0.123892
MGH66-P06-A11	0.555746	0.301041	0.226641	0.1768	0.670462	-0.765968	-1.63418
MGH66-P06-E03	0.542097	0.25642	0.2101	0.348638	0.721503	-1.30495	-1.20087
MGH66-P04-C01	0.676938	0.119118	0.195211	0.593676	0.379011	-0.530019	1.43344
MGH66-P05-A04	0.509801	0.149525	0.253378	0.203814	0.573395	0.744677	0.917697
MGH66-P07-G08	0.642907	0.138765	0.283015	0.418553	0.64612	0.84739	1.17962
MGH66-P06-C11	0.403046	0.17946	0.365255	0.304808	0.753456	-0.610829	-1.06772
MGH66-P08-G07	0.651412	0.134139	0.212258	0.435575	0.690405	0.990207	0.969725
MGH66-P06-C03	0.570218	0.188512	0.272361	0.462305	0.691596	1.01368	0.407944
MGH66-P04-G05	0.608221	0.358483	0.316738	0.285568	0.722296	-1.35032	-1.22483
MGH66-P08-B11	0.521934	0.312126	0.332862	0.189853	0.83645	-1.40501	-1.8322
MGH66-P05-H05	0.550561	0.416197	0.329599	0.213016	0.86974	-0.574715	-1.32572
MGH66-P04-E10	0.470246	0.328308	0.330077	0.222012	0.753097	-1.55627	-1.83326
MGH66-P03-C09	0.439328	0.458538	0.259289	0.028601	0.774869	-0.287647	-1.51012
MGH66-P05-E12	0.505727	0.515412	0.221643	0.142513	0.696312	-0.384753	-1.55194
MGH66-P03-G09	0.566203	0.352014	0.359975	0.229037	0.790571	-1.39906	-1.61354
MGH66-P06-E06	0.527554	0.471771	0.388358	0.206806	0.803337	-0.915402	-1.56684
MGH66-P08-A08	0.596832	0.423206	0.370508	0.253315	0.828079	-0.962109	-1.51752
MGH66-P06-F11	0.595673	0.264952	0.25861	0.264664	0.872311	-1.24431	-1.27126
MGH66-P03-F04	0.625299	0.399513	0.30357	0.215973	0.926696	-1.04906	-1.44187
MGH66-P06-F02	0.560346	0.328825	0.302187	0.253525	0.815591	-0.770928	-1.82914
MGH66-P03-E11	0.545115	0.429165	0.358985	0.254501	0.746273	0.412578	-1.63638
MGH66-P05-G03	0.610729	0.315825	0.204941	0.212648	0.794169	-1.28402	-1.84285
MGH66-P08-H07	0.466907	0.240627	0.283353	0.182075	0.828555	-1.54878	-1.59835
MGH66-P05-B05	0.661068	0.20081	0.226779	0.360226	0.644439	-0.846532	-0.158607
MGH66-P03-G08	0.498477	0.350771	0.366091	0.160264	0.727786	-1.13031	-1.68821
MGH66-P03-E04	0.611682	0.304984	0.155619	0.171217	0.733058	-1.44754	-1.76739
MGH66-P04-C03	0.367478	0.457925	0.43616	0.259196	0.661393	0.941918	-2.20934
MGH66-P05-F04	0.648161	0.374053	0.167322	0.106213	0.908894	-1.38772	-1.5376
MGH66-P08-H06	0.536263	0.40577	0.288814	0.115156	0.887481	-0.613566	-1.43544
MGH66-P07-H01	0.498099	0.357517	0.371243	0.115308	0.765813	-1.36005	-1.83845
MGH66-P04-E04	0.56452	0.245392	0.241495	0.265228	0.773723	-1.0284	-1.34477
MGH66-P07-G02	0.522842	0.245321	0.312746	0.141974	0.768146	-1.47333	-1.74054
MGH66-P08-B04	0.58203	0.382	0.30794	0.378687	0.860159	-1.24236	-1.42565
MGH66-P04-H03	0.530352	0.399562	0.181656	0.239609	0.803949	-1.12391	-2.00422
MGH66-P07-E08	0.688888	0.24729	0.178111	0.223698	0.89128	-1.3449	-1.37819
MGH66-P04-F03	0.579053	0.407583	0.365883	0.162772	0.894375	-1.52099	-2.04976
MGH66-P08-B01	0.569612	0.304538	0.198529	0.226091	0.721846	-1.26966	-1.6975
MGH66-P06-D04	0.570577	0.3202	0.363645	0.387294	0.739718	-1.16481	-1.62594
MGH66-P07-H11	0.596631	0.4703	0.261656	0.301399	0.835302	-0.284365	-1.49623
MGH66-P05-A12	0.502694	0.390213	0.285018	0.247101	0.797634	-0.937717	-2.01307
MGH66-P05-H08	0.554759	0.423974	0.353279	0.334255	0.672398	1.1056	-1.93351
MGH66-P05-B11	0.640232	0.25578	0.329487	0.269209	0.696858	-1.15047	-1.46472
MGH66-P08-A05	0.511661	0.234847	0.242805	0.301466	0.654243	-1.38131	-1.50592
MGH66-P06-C04	0.561233	0.378547	0.328478	0.296141	0.73551	-0.810084	-1.75448
MGH66-P06-B03	0.517471	0.261067	0.394643	0.436974	0.490413	0.385054	-0.318607
MGH66-P07-C01	0.475927	0.382579	0.25277	0.143827	0.753319	0.772377	-2.04619
MGH66-P05-E06	0.690206	0.252169	0.295379	0.455355	0.687706	-1.36127	-0.651338
MGH66-P03-F12	0.546948	0.140146	0.266914	0.744582	0.23955	-1.05219	2.02645
MGH66-P08-B06	0.654122	0.301581	0.216729	0.178591	0.783445	-1.15475	-0.978505
MGH66-P07-C06	0.667687	0.293824	0.200604	0.209901	0.863418	-1.23708	-1.38102
MGH66-P05-A11	0.604229	0.228225	0.250119	0.409748	0.47568	1.40011	1.264
MGH66-P05-A02	0.631337	0.221862	0.181363	0.258796	0.796623	-1.70977	-1.53295
MGH66-P03-C07	0.575445	0.228087	0.181424	0.369282	0.611944	0.966884	0.423816
MGH66-P05-E04	0.477439	0.496826	0.303289	0.240027	0.669039	1.10597	-1.33242
MGH66-P07-D04	0.683867	0.351022	0.181137	0.290016	0.817399	-0.971636	-1.32433
MGH66-P03-D11	0.517974	0.226057	0.392423	0.293081	0.804969	-0.829754	-1.56135
MGH66-P04-D09	0.527551	0.308519	0.275824	0.46999	0.549897	0.86213	0.415713
MGH66-P04-C02	0.626513	0.35608	0.214223	0.229785	0.803186	-1.90413	-1.89828
MGH66-P08-C06	0.615471	0.27609	0.352948	0.2309	0.748726	-1.24336	-1.62625
MGH66-P08-B02	0.631481	0.271409	0.276281	0.28961	0.70559	0.756092	0.0428295
MGH66-P03-C11	0.651673	0.494352	0.369634	0.152285	0.851676	0.860517	-1.97545
MGH66-P04-G06	0.365388	0.408891	0.327132	0.214038	0.64512	-0.223305	-1.43048
MGH66-P08-D03	0.378164	0.483322	0.360409	0.254319	0.738846	0.568543	-1.51885
MGH66-P05-G04	0.548131	0.442583	0.232464	0.292939	0.75421	-0.566324	-1.41924
MGH66-P05-B01	0.505925	0.371593	0.338306	0.338714	0.703113	0.521696	-1.38209
MGH66-P08-C10	0.454364	0.478837	0.250432	0.238141	0.641955	0.679014	-1.26641
MGH66-P08-D05	0.564955	0.347278	0.288219	0.124346	0.828427	-1.11845	-1.68095
MGH66-P08-E03	0.52344	0.335899	0.304639	0.135009	0.88874	-0.486056	-1.52613
MGH66-P06-B06	0.589479	0.272182	0.233279	0.206107	0.852349	-1.0744	-1.21676
MGH66-P05-F08	0.719747	0.28265	0.21469	0.236345	0.755523	-1.39058	-1.36885
MGH66-P05-D10	0.63339	0.381714	0.308718	0.388327	0.838098	-0.291457	-1.25758
MGH66-P08-D07	0.288875	0.280083	0.27443	0.331512	0.65394	-0.148675	-1.51882
MGH66-P07-G05	0.256237	0.225362	0.350969	0.243002	0.643394	-0.9354	-1.57992
MGH66-P04-H10	0.423829	0.322042	0.294598	0.391642	0.541136	-1.31673	-1.53099
MGH66-P05-D01	0.486915	0.448635	0.474699	0.188506	0.763274	-0.405659	-1.83235
MGH66-P08-E06	0.551726	0.258569	0.34859	0.256001	0.651798	-0.86566	-0.954281
MGH66-P07-B12	0.511346	0.304458	0.32125	0.214475	0.854826	-1.3803	-1.58186
MGH66-P05-E02	0.569286	0.395966	0.162329	0.468377	0.678261	-0.578962	-1.11466
MGH66-P05-A03	0.613948	0.246488	0.259395	0.310905	0.71882	-1.29533	-1.27967
MGH66-P07-D07	0.440761	0.256567	0.37991	0.326336	0.76146	-1.68398	-1.49691
MGH66-P08-A10	0.528665	0.465267	0.289576	0.165401	0.870768	0.263014	-1.58544
MGH66-P06-G02	0.31036	0.387156	0.479816	0.109366	0.664035	1.86737	-2.09602
MGH66-P07-G04	0.475784	0.106981	0.267717	0.281158	0.426177	-1.43805	-0.522065
MGH66-P03-G06	0.500843	0.296254	0.255859	0.191071	0.765431	-0.815392	-1.54621
MGH66-P08-F01	0.510377	0.373805	0.259226	0.191064	0.623282	-0.867309	-1.5071
MGH66-P05-E08	0.564488	0.461279	0.252522	0.247722	0.676089	0.391676	-1.78279
MGH66-P03-G11	0.662323	0.278476	0.191767	0.17796	0.766733	-1.6011	-1.77747
MGH66-P07-A09	0.721961	0.28978	0.182343	0.755694	0.482242	-1.40898	1.37395
MGH100-P8-C09	0.246371	0.186755	0.417835	0.281798	0.349747	1.8562	-1.72451
MGH100-P8-D09	0.453284	0.383969	0.575976	0.205596	0.401295	2.23059	-2.02733
MGH100-P5-A10	0.281913	0.2647	0.338739	0.276813	0.34153	2.6334	-2.381
MGH100-P9-B01	0.443671	0.487047	0.763774	0.180103	0.404603	2.29435	-2.12337
MGH100-P9-D06	0.328964	0.39936	0.6778	0.239198	0.336752	2.36321	-2.26505
MGH100-P8-H05	0.444367	0.369683	0.610718	0.260235	0.34558	2.24559	-2.33394
MGH100-P9-D07	0.594074	0.329745	0.276388	0.299581	0.674664	-0.982751	-1.66153
MGH100-P5-D09	0.644188	0.327083	0.286968	0.153471	0.711176	-0.845669	-1.36584
MGH100-P5-H11	0.477405	0.482859	0.437945	0.291926	0.617796	1.98678	-2.14987
MGH100-P6-B10	0.687719	0.276799	0.265517	0.217638	0.842571	-1.74033	-1.88094
MGH100-P5-E11	0.241776	0.41327	0.725313	0.256233	0.501689	1.68719	-2.07544
MGH100-P6-A06	0.561533	0.333886	0.426979	0.330203	0.67179	-0.178903	-1.67324
MGH100-P5-B09	0.368747	0.336945	0.390428	0.122565	0.391447	2.17642	-2.17013
MGH100-P6-G11	0.630942	0.396587	0.329929	0.237776	0.811358	-1.29846	-1.71127
MGH100-P5-E06	0.438519	0.474948	0.432546	0.3845	0.58658	1.64725	-1.69611
MGH100-P8-E09	0.660557	0.345543	0.225549	0.33142	0.760383	-1.27616	-1.08343
MGH100-P9-A02	0.437446	0.377854	0.499801	0.214769	0.5446	2.3613	-2.5261
MGH100-P9-H02	0.547791	0.422171	0.390718	0.216955	0.625092	1.11632	-1.79877
MGH100-P9-H07	0.531669	0.240525	0.343514	0.239894	0.663092	1.37311	-1.95485
MGH100-P8-C12	0.553794	0.340679	0.347656	0.263905	0.661782	-0.510162	-1.27786
MGH100-P9-B08	0.396064	0.405343	0.260464	0.319564	0.494614	1.38839	-1.36688
MGH100-P6-B12	0.556562	0.280965	0.357038	0.398454	0.684329	1.37984	0.234182
MGH100-P6-C11	0.568529	0.49505	0.375449	0.187002	0.7587	-0.746837	-1.39859
MGH100-P6-D12	0.542158	0.376726	0.282186	0.224779	0.841017	-1.20163	-1.55165
MGH100-P5-H03	0.497167	0.391462	0.555321	0.158213	0.498955	0.827955	-1.82552
MGH100-P5-E02	0.409925	0.248509	0.355131	0.213759	0.712679	-1.62038	-1.51443
MGH100-P6-B09	0.598503	0.261751	0.309107	0.37982	0.665065	-0.323785	-0.186946
MGH100-P9-B11	0.40978	0.217101	0.506644	0.253474	0.587915	0.852999	-2.00813
MGH100-P6-H06	0.435228	0.232337	0.330629	0.445074	0.448485	2.16688	-2.1
MGH100-P5-C03	0.742549	0.295724	0.227203	0.364445	0.797108	-0.945293	-1.53609
MGH100-P5-E08	0.695547	0.356065	0.291038	0.241758	0.725714	-1.35186	-1.60768
MGH100-P9-C04	0.713005	0.24033	0.179662	0.359163	0.728675	-1.49923	-1.47412
MGH100-P8-A04	0.543886	0.178676	0.261002	0.241974	0.552569	-0.816079	-1.82532
MGH100-P9-H01	0.652631	0.317024	0.242097	0.161542	0.76322	-1.60881	-1.66537
MGH100-P5-H01	0.613755	0.422069	0.318087	0.344959	0.729538	-1.21331	-1.48064
MGH100-P5-E12	0.468857	0.420019	0.393164	0.25472	0.672211	0.260334	-1.61177
MGH100-P5-G09	0.670378	0.350324	0.213468	0.30646	0.80471	-1.78521	-2.00397
MGH100-P9-D01	0.605069	0.352802	0.337927	0.19046	0.893543	-1.61403	-1.94262
MGH100-P8-F07	0.435773	0.366828	0.52177	0.312204	0.425587	2.01553	-2.38464
MGH100-P5-A07	0.556793	0.360036	0.285288	0.188374	0.536156	0.91888	-0.914963
MGH100-P6-D09	0.627972	0.215777	0.215063	0.252	0.794398	-1.82896	-1.81678
MGH100-P5-A01	0.673102	0.314909	0.252959	0.459591	0.757082	-1.55691	-1.49789
MGH100-P9-G01	0.443805	0.17326	0.359224	0.256227	0.664899	-1.47194	-1.26297
MGH100-P9-B06	0.483733	0.385015	0.323406	0.262178	0.679765	1.03419	-1.91601
MGH100-P6-H12	0.318164	0.269089	0.379034	0.33297	0.297924	2.61243	-2.41722
MGH100-P9-A06	0.466722	0.291376	0.663019	0.285125	0.382907	2.5067	-2.35125
MGH100-P8-D08	0.453372	0.408417	0.470852	0.249338	0.647611	1.9754	-2.23517
MGH100-P6-G04	0.696297	0.261442	0.166274	0.619062	0.438008	-0.407443	1.11144
MGH100-P8-F04	0.439767	0.388013	0.255236	0.397085	0.707106	-0.758045	-1.47448
MGH100-P5-F11	0.67864	0.365287	0.231669	0.237634	0.723279	-1.5311	-1.76362
MGH100-P6-G12	0.644456	0.341737	0.160949	0.273563	0.682348	-1.70414	-1.85889
MGH100-P5-A04	0.454529	0.345219	0.421943	0.317292	0.439706	2.13782	-2.0414
MGH100-P6-D04	0.320843	0.414574	0.463087	0.240742	0.490216	1.93383	-2.03899
MGH100-P6-F07	0.691403	0.281476	0.394932	0.308206	0.791181	-1.5642	-1.54556
MGH100-P8-C02	0.552143	0.21129	0.267199	0.288478	0.628589	-1.56599	-1.37433
MGH100-P8-D02	0.441802	0.464577	0.45273	0.172059	0.673611	0.417629	-1.87864
MGH100-P6-E05	0.604267	0.405218	0.219152	0.215842	0.674417	-1.14989	-1.85876
MGH100-P9-B04	0.71705	0.319504	0.147302	0.255441	0.785498	-1.4541	-1.3424
MGH100-P9-G06	0.75625	0.336405	0.266407	0.296338	0.744129	-1.65449	-1.82272
MGH100-P8-A06	0.499637	0.356269	0.339047	0.253174	0.761437	-1.48445	-1.93622
MGH100-P5-D04	0.702844	0.437991	0.264528	0.232063	0.755876	-1.55343	-1.84109
MGH100-P5-B10	0.648824	0.367546	0.237471	0.305644	0.736601	-1.53214	-2.06813
MGH100-P5-D07	0.654176	0.409315	0.106767	0.420566	0.785739	-1.35358	-1.04605
MGH100-P5-F04	0.675612	0.334126	0.159162	0.467074	0.505962	-1.1236	-0.94618
MGH100-P8-D03	0.650364	0.380192	0.322914	0.181169	0.717322	-1.24292	-1.4375
MGH100-P9-H05	0.580375	0.250703	0.282488	0.414656	0.808929	-1.21393	-1.24383
MGH100-P9-G07	0.656017	0.273917	0.310864	0.221215	0.815486	-1.48968	-1.62583
MGH100-P5-C06	0.574527	0.3588	0.413775	0.305574	0.722416	-1.41765	-1.96145
MGH100-P5-E01	0.520098	0.332491	0.139636	0.338915	0.774776	-0.974262	-1.24236
MGH100-P8-H08	0.505147	0.334745	0.511135	0.436394	0.475989	2.05479	-2.05054
MGH100-P5-C10	0.497342	0.417428	0.440657	0.243031	0.645735	0.988251	-1.88653
MGH100-P6-E09	0.689753	0.314566	0.179858	0.303386	0.687458	-1.56123	-1.70077
MGH100-P9-E04	0.612422	0.450573	0.249962	0.120217	0.736232	-1.09323	-1.55255
MGH100-P6-G07	0.609297	0.363566	0.262003	0.393704	0.700199	-0.666499	-0.919792
MGH100-P9-F04	0.536327	0.327739	0.198935	0.463513	0.78658	-0.453859	-1.17356
MGH100-P8-F09	0.414965	0.541724	0.331991	0.129785	0.594201	1.94745	-1.87827
MGH100-P5-G06	0.72045	0.370394	0.150836	0.607684	0.653574	-0.0768841	-0.638614
MGH100-P9-B07	0.576506	0.267761	0.252385	0.386055	0.408882	2.01059	1.82065
MGH100-P9-H08	0.516912	0.365972	0.31594	0.257965	0.711837	-0.988629	-1.52423
MGH100-P6-C01	0.451844	0.247441	0.410925	0.179015	0.616651	1.69617	-2.08697
MGH100-P9-C08	0.511349	0.508321	0.234558	0.248136	0.74838	-0.831646	-1.56729
MGH100-P8-G03	0.545368	0.383501	0.279586	0.2743	0.744507	-0.839208	-1.48635
MGH100-P9-A11	0.480219	0.480915	0.20833	0.244221	0.71288	-0.394622	-1.53959
MGH100-P5-H06	0.653588	0.368775	0.407101	0.432974	0.758667	-0.495364	-1.3319
MGH100-P9-C02	0.393371	0.263218	0.542392	0.295499	0.539565	2.20748	-2.18175
MGH100-P9-G04	0.39613	0.256529	0.497677	0.28537	0.391589	1.86689	-1.99969
MGH100-P9-C05	0.400983	0.175399	0.356474	0.322974	0.553622	-0.205452	-1.42875
MGH100-P5-D03	0.56378	0.279792	0.235693	0.414053	0.600608	-1.39432	-1.80133
MGH100-P5-H07	0.655518	0.247086	0.262926	0.455131	0.52447	0.202247	0.171371
MGH100-P6-E08	0.741717	0.118614	0.212367	0.732596	0.290758	1.94928	2.17597
MGH100-P9-D05	0.541783	0.318152	0.227187	0.319386	0.742425	1.00973	-1.10676
MGH100-P5-G01	0.511853	0.384688	0.371994	0.448203	0.6274	1.7513	-1.85969
MGH100-P6-H05	0.751783	0.225413	0.233549	0.586856	0.586843	0.170943	0.948276
MGH100-P9-C03	0.788654	0.163535	0.141515	0.708896	0.353487	0.128141	1.76287
MGH100-P9-H11	0.633961	0.159433	0.260815	0.860368	0.217132	0.817687	1.27762
MGH100-P6-H09	0.706265	0.234612	0.227797	0.63296	0.636821	0.756021	0.908416
MGH100-P9-F08	0.693251	0.124762	0.1731	0.539153	0.397666	-0.256959	1.32109
MGH100-P9-E01	0.691796	0.182135	0.221724	0.691906	0.588107	1.90318	-1.38963
MGH100-P6-A11	0.622258	0.135611	0.273284	0.656818	0.311544	1.27849	1.82635
MGH100-P9-C11	0.723788	0.171679	0.11054	0.921611	0.269233	1.77059	1.99864
MGH100-P6-A07	0.597401	0.110685	0.333328	0.706788	0.478242	0.00673086	1.18439
MGH100-P6-D07	0.624455	0.323196	0.240586	0.545465	0.656834	-1.17559	-0.695883
MGH100-P9-D09	0.503461	0.301999	0.265473	0.487509	0.778361	0.250221	-0.888394
MGH100-P8-D05	0.725355	0.325283	0.132239	0.198519	0.769867	-1.68495	-1.48374
MGH100-P9-G02	0.74907	0.184237	0.120065	0.830363	0.22692	1.97486	1.82176
MGH100-P8-B09	0.673081	0.190201	0.204181	0.722468	0.186665	1.17068	1.7991
MGH100-P8-H12	0.78279	0.198813	0.17486	0.65351	0.354067	1.35503	2.01631
MGH100-P6-F12	0.612248	0.248991	0.393517	0.672913	0.460059	0.183823	1.27792
MGH100-P8-G07	0.734957	0.214386	0.231005	0.743289	0.318772	1.9461	2.20336
MGH100-P8-G04	0.75932	0.142086	0.266918	0.499608	0.371452	1.50607	2.16119
MGH100-P8-A08	0.627165	0.233247	0.243815	0.635038	0.474101	0.366959	0.922416
MGH100-P6-A02	0.736423	0.201058	0.133471	0.652897	0.51174	-0.240871	0.835211
MGH100-P8-B02	0.549469	0.22289	0.334282	0.781827	0.285126	0.0169175	1.44422
MGH100-P6-C04	0.540922	0.143876	0.279861	0.584219	0.489133	-0.18698	1.28259
MGH100-P9-A01	0.653869	0.278337	0.265611	0.552468	0.556064	-0.235976	0.284541
MGH100-P6-H04	0.88965	0.152355	0.168623	0.815604	0.366493	1.34377	2.0985
MGH100-P6-F05	0.74553	0.184714	0.235021	0.767906	0.512619	0.988921	1.34787
MGH100-P5-A12	0.623556	0.27523	0.220361	0.592295	0.31482	0.887258	1.07953
MGH100-P5-C04	0.810803	0.251466	0.0791682	0.582238	0.568691	0.56911	1.56911
MGH100-P6-H11	0.681789	0.207234	0.203384	0.653117	0.576336	0.312291	0.796884
MGH100-P6-D10	0.671062	0.333912	0.164983	0.547962	0.481367	-0.627091	0.750238
MGH100-P9-F01	0.67939	0.11171	0.223826	0.732585	0.343711	1.70912	1.74551
MGH100-P8-G06	0.58115	0.231269	0.138625	0.571795	0.496337	0.660989	1.35385
MGH100-P6-A01	0.784707	0.186392	0.170737	0.538382	0.530494	1.04554	1.84641
MGH100-P9-F07	0.67536	0.247192	0.247993	0.615923	0.461187	-0.590642	1.36793
MGH100-P8-E03	0.736753	0.227765	0.156883	0.401988	0.514865	-0.656702	0.618548
MGH100-P5-F09	0.690361	0.139401	0.251373	0.739243	0.470891	1.00508	1.33975
MGH100-P6-B07	0.710132	0.257653	0.116065	0.575525	0.460216	-0.671077	-0.257087
MGH100-P5-H04	0.706965	0.280437	0.192334	0.817048	0.536168	0.481947	1.48852
MGH100-P9-B03	0.738275	0.189121	0.112764	0.680512	0.330552	-0.0894649	1.66436
MGH100-P8-E08	0.687758	0.353356	0.404787	0.347233	0.551144	-0.80156	-0.7852
MGH100-P8-B11	0.615147	0.381185	0.361683	0.425776	0.64271	-0.59994	-0.0684007
MGH100-P5-A06	0.713256	0.239533	0.164218	0.703794	0.360754	-0.0428043	0.998145
MGH100-P6-H01	0.707847	0.251846	0.185053	0.589662	0.575458	0.427326	1.21082
MGH100-P9-A09	0.696033	0.378457	0.103831	0.470282	0.616664	1.58244	1.34286
MGH100-P6-D08	0.66602	0.156094	0.193056	0.575203	0.322348	1.2712	1.74271
MGH100-P8-C04	0.628529	0.200149	0.17524	0.523221	0.505884	0.422064	1.15133
MGH100-P6-C09	0.678472	0.257412	0.155337	0.284331	0.62491	1.84986	-1.49036
MGH100-P8-F03	0.603116	0.419863	0.526237	0.453922	0.485627	2.0165	-2.10292
MGH100-P8-G08	0.679134	0.275621	0.178907	0.619153	0.611792	0.24642	0.000300249
MGH100-P9-E06	0.676992	0.367085	0.340757	0.475491	0.674622	-0.201597	-0.124522
MGH100-P9-C07	0.753613	0.344416	0.314956	0.412875	0.441804	-0.0943706	0.805028
MGH100-P6-C05	0.693408	0.207024	0.205457	0.614892	0.562124	0.352348	1.23206
MGH100-P8-F10	0.686883	0.320786	0.164819	0.612025	0.639649	0.230585	0.644341
MGH100-P5-A09	0.634057	0.275644	0.158697	0.664043	0.602747	0.00583816	0.52745
MGH100-P8-D01	0.772342	0.204422	0.186151	0.653245	0.334714	0.425149	1.55488
MGH100-P8-B10	0.710231	0.339437	0.195412	0.591381	0.652501	-0.496833	0.331025
MGH100-P6-E07	0.648513	0.324199	0.162868	0.259172	0.690971	-0.158497	-1.16594
MGH100-P8-E06	0.775239	0.253362	0.0300933	0.862458	0.405813	0.595285	0.862213
MGH100-P8-F05	0.746494	0.191228	0.191568	0.7462	0.541417	-0.112713	1.00285
MGH100-P8-E05	0.678748	0.178581	0.297708	0.654101	0.486254	0.475859	1.44765
MGH100-P5-G03	0.82403	0.381134	0.259668	0.512855	0.667311	-0.951908	-0.141871
MGH100-P5-F06	0.871355	0.332802	0.164013	0.602496	0.783659	-1.61328	-0.71065
MGH100-P6-D02	0.639091	0.204907	0.262891	0.426205	0.515189	0.926452	0.936481
MGH100-P8-B12	0.610612	0.261155	0.207135	0.617992	0.493507	-0.107018	1.50465
MGH100-P9-G05	0.711665	0.170256	0.196775	0.763977	0.55592	0.176475	1.28676
MGH100-P5-G12	0.504451	0.27997	0.266126	0.455141	0.585502	0.70451	0.129244
MGH100-P6-A12	0.56287	0.410024	0.309233	0.443838	0.35161	0.720339	-0.290546
MGH100-P5-A03	0.768844	0.264963	0.14815	0.702298	0.634592	-0.105311	1.34162
MGH100-P8-B08	0.508117	0.191523	0.273003	0.503412	0.515757	0.530684	0.791146
MGH100-P8-G12	0.412747	0.343164	0.387303	0.27439	0.620957	-0.12681	-1.82835
MGH100-P6-A09	0.495271	0.315079	0.232713	0.550099	0.495202	-0.289387	0.148818
MGH100-P9-G08	0.674316	0.269226	0.325372	0.581334	0.369482	-0.634547	0.73702
MGH100-P6-G02	0.662515	0.290639	0.173398	0.314036	0.638087	-1.53914	-1.72929
MGH100-P8-C07	0.728513	0.252348	0.298594	0.593022	0.480734	-0.407014	1.63646
MGH100-P5-A08	0.680201	0.228309	0.169575	0.667503	0.492672	0.134653	1.05047
MGH100-P9-H06	0.816502	0.235588	0.207521	0.712428	0.334079	0.108926	1.37445
MGH100-P8-B03	0.774891	0.147796	0.138935	0.75202	0.322948	1.5429	1.81604
MGH100-P9-H09	0.678164	0.145063	0.189558	0.382966	0.498417	0.491993	1.31245
MGH100-P8-B06	0.776454	0.182873	0.246701	0.794245	0.37095	1.41447	2.25565
MGH100-P6-E04	0.659897	0.107227	0.210766	0.72509	0.358908	0.252337	1.86594
MGH100-P8-C10	0.554079	0.434488	0.29914	0.234254	0.733479	-0.377239	-1.61443
MGH100-P8-G01	0.667133	0.199746	0.252162	0.572172	0.572974	-0.0383814	1.44389
MGH100-P8-F08	0.700634	0.180604	0.249892	0.503377	0.394321	0.953155	1.47684
MGH100-P5-B08	0.731357	0.151981	0.263505	0.941631	0.360053	1.27098	2.24869
MGH100-P6-F09	0.618247	0.270255	0.230748	0.645579	0.44388	-1.18729	1.32965
MGH100-P9-E05	0.690628	0.124732	0.200849	0.640323	0.438164	1.58276	2.12266
MGH100-P5-C08	0.552807	0.105505	0.324335	0.625552	0.304591	0.784886	1.20644
MGH100-P8-G02	0.397614	0.263925	0.517779	0.366571	0.390162	2.23722	-2.21755
MGH100-P6-B06	0.43368	0.373896	0.318992	0.36135	0.551241	0.203777	-0.852797
MGH100-P5-F12	0.364149	0.0647343	0.304528	0.484517	0.377078	0.40844	1.47537
MGH100-P8-A02	0.431331	0.091878	0.379537	0.475075	0.202823	0.527122	1.52909
MGH100-P9-B05	0.734677	0.145985	0.196388	0.733889	0.57985	1.31045	1.89775
MGH100-P5-B02	0.747344	0.213626	0.245413	0.490245	0.53253	0.0987203	0.860104
MGH100-P9-F09	0.438635	0.313412	0.419484	0.332396	0.386527	2.3632	-2.23995
MGH100-P9-C01	0.673569	0.16911	0.265337	0.669209	0.287752	-0.465137	1.79728
MGH100-P8-H02	0.226398	0.183913	0.31946	0.552226	0.482517	0.519117	-0.343251
MGH100-P5-B07	0.611689	0.314983	0.164855	0.490525	0.686856	0.416195	-0.990204
MGH100-P8-C03	0.684191	0.186986	0.255383	0.860674	0.238848	-0.152256	1.55197
MGH100-P9-F06	0.755975	0.0944601	0.206193	0.532976	0.575669	0.574976	1.29636
MGH100-P9-G10	0.441875	0.272541	0.260965	0.56255	0.566586	0.747267	-0.477251
MGH100-P8-D11	0.627009	0.433487	0.219262	0.419305	0.657884	1.1868	-1.27346
MGH100-P8-G05	0.672597	0.340809	0.382683	0.589928	0.653257	-1.14361	-0.745423
MGH100-P6-D05	0.498991	0.362396	0.203431	0.446105	0.695441	-1.05253	-1.30593
MGH100-P9-D10	0.858518	0.260047	0.235707	0.678017	0.568096	0.140243	1.25475
MGH100-P9-A04	0.759915	0.244634	0.213087	0.591925	0.544329	0.111352	1.34157
MGH100-P5-G02	0.479312	0.485808	0.393021	0.393693	0.570284	-0.411219	-1.51384
MGH100-P9-A07	0.439137	0.161497	0.223242	0.52957	0.370245	2.03268	-1.26527
MGH100-P5-D01	0.681853	0.368591	0.209072	0.492066	0.477712	-0.39551	0.921294
MGH100-P9-G03	0.542644	0.293621	0.231487	0.464367	0.686126	0.0455177	-0.493232
MGH100-P5-H10	0.619867	0.142726	0.179795	0.762801	0.364637	0.665548	0.0832889
MGH100-P9-H03	0.740177	0.15041	0.258517	0.844873	0.364775	1.39735	2.21295
MGH100-P8-F11	0.25874	0.437307	0.258212	0.435113	0.510095	1.89808	-1.81842
MGH100-P9-A03	0.39788	0.179373	0.337025	0.363149	0.546638	1.45284	-1.62027
MGH100-P9-A08	0.418667	0.252438	0.514748	0.267367	0.502717	2.07429	-1.91003
MGH100-P6-F11	0.665916	0.237267	0.267746	0.152543	0.698915	-1.03589	-1.46885
MGH100-P6-F01	0.492865	0.323793	0.359169	0.33948	0.756958	-1.51167	-1.76676
MGH100-P8-A12	0.410879	0.369104	0.628582	0.247497	0.345717	2.06122	-1.89983
MGH100-P9-C06	0.33447	0.510408	0.801525	0.176469	0.41876	2.10537	-2.42316
MGH101-P3-C12	0.249761	0.296536	0.36246	0.425676	0.290397	0.639958	-1.03052
MGH101-P3-F04	0.274232	0.247152	0.548982	0.329209	0.35154	0.96889	-1.4163
MGH101-P2-E12	0.293671	0.290601	0.401026	0.344344	0.325502	0.560201	-0.844223
MGH101-P4-E01	0.290602	0.262886	0.458591	0.364847	0.198714	1.55225	-1.49627
MGH101-P4-C03	0.368198	0.278676	0.485515	0.241182	0.31817	-0.927286	-1.57252
MGH101-P4-F05	0.292559	0.253321	0.405448	0.402493	0.438741	-1.09593	-1.52668
MGH101-P4-D03	0.372094	0.247057	0.345237	0.32462	0.462064	-1.86115	-2.06348
MGH101-P2-E07	0.205715	0.272647	0.471355	0.421424	0.279974	1.5086	-1.55367
MGH101-P4-E04	0.17271	0.262985	0.509661	0.366071	0.156365	1.56564	-1.73429
MGH101-P2-B03	0.354373	0.287854	0.35328	0.281298	0.332365	-1.35157	-1.65805
MGH101-P3-D04	0.275841	0.381272	0.586841	0.385869	0.420716	2.01194	-2.15158
MGH101-P2-D03	0.315866	0.316081	0.381423	0.302529	0.353287	-1.09987	-1.51907
MGH101-P2-F08	0.273948	0.242378	0.412346	0.278428	0.207719	1.32347	-0.990658
MGH101-P2-E04	0.272315	0.315608	0.476391	0.398834	0.251266	0.654683	-2.01711
MGH101-P2-E03	0.330438	0.287721	0.380786	0.386385	0.32454	0.575809	-1.15414
MGH101-P2-G05	0.226815	0.271261	0.370982	0.319082	0.306507	-0.855175	-1.75934
MGH101-P4-G05	0.461168	0.243159	0.347093	0.348537	0.553058	-1.63682	-1.49633
MGH101-P2-B08	0.268108	0.299107	0.512149	0.361984	0.446078	-0.137406	-1.45481
MGH101-P4-A07	0.295206	0.273774	0.376994	0.354201	0.299334	-0.609863	-1.64846
MGH101-P3-C10	0.325402	0.418503	0.421685	0.244045	0.447997	0.611823	-1.80025
MGH101-P2-D05	0.308793	0.271538	0.457432	0.255245	0.264874	-1.69281	-1.99372
MGH101-P2-F05	0.30313	0.278273	0.322458	0.315051	0.512748	-1.49971	-1.53001
MGH101-P4-A06	0.334211	0.289054	0.440248	0.349435	0.411234	-1.37141	-1.97013
MGH101-P3-E11	0.398927	0.392289	0.341416	0.4095	0.527925	0.873143	-1.82686
MGH101-P2-C10	0.324447	0.340427	0.381464	0.386138	0.278643	-1.34131	-1.34139
MGH101-P2-H08	0.373244	0.311549	0.355113	0.298239	0.347681	-1.82344	-1.94731
MGH101-P2-H11	0.353061	0.294186	0.51835	0.383468	0.270029	1.63809	-1.91693
MGH101-P4-E08	0.454868	0.221386	0.442856	0.402372	0.426515	-1.57167	-1.81959
MGH101-P2-B02	0.351085	0.222492	0.344158	0.35509	0.253231	-1.23715	-1.37775
MGH101-P4-B02	0.372552	0.245506	0.354809	0.362705	0.407517	-2.13538	-2.02612
MGH101-P4-G07	0.305583	0.207815	0.46389	0.224952	0.335567	-1.62295	-1.76799
MGH101-P4-E02	0.290953	0.335144	0.429193	0.287076	0.432772	-1.56626	-1.49008
MGH101-P4-H08	0.272048	0.32799	0.355244	0.261299	0.295052	-1.82277	-1.80812
MGH101-P2-B09	0.23962	0.305746	0.420925	0.227411	0.194781	-0.376582	-1.53192
MGH101-P2-C08	0.290921	0.311283	0.446471	0.322771	0.370009	-0.493867	-1.25419
MGH101-P3-H02	0.376655	0.287245	0.418949	0.278169	0.561398	-1.3065	-1.88819
MGH101-P4-G09	0.388243	0.327211	0.351017	0.325208	0.311058	-1.72742	-1.27771
MGH101-P3-H11	0.360865	0.300377	0.360382	0.390744	0.452203	-1.31225	-1.19563
MGH101-P2-G12	0.21182	0.367343	0.523822	0.312505	0.158819	1.86579	-2.0318
MGH101-P2-B12	0.228435	0.332476	0.431457	0.356256	0.226414	1.87697	-1.75503
MGH101-P3-H07	0.31774	0.383357	0.538436	0.368698	0.372933	0.547524	-2.01688
MGH101-P3-C09	0.292505	0.31797	0.453635	0.287194	0.214099	-0.212951	-1.78158
MGH101-P3-H12	0.271553	0.354141	0.398423	0.200146	0.24961	0.0982142	-1.99464
MGH101-P3-A07	0.439725	0.258103	0.329509	0.499548	0.324363	-1.73307	-0.917176
MGH101-P2-G09	0.343611	0.303413	0.353614	0.27004	0.325722	-1.18048	-0.9714
MGH101-P4-E12	0.414266	0.326381	0.262038	0.385386	0.50462	-0.137071	-1.35401
MGH101-P4-B04	0.335816	0.302127	0.399247	0.251733	0.434117	-1.24037	-1.78286
MGH101-P2-A01	0.217115	0.32098	0.484036	0.389471	0.382775	0.925729	-1.79959
MGH101-P2-F09	0.366472	0.275217	0.313939	0.287006	0.43099	-1.68121	-1.9186
MGH101-P2-C05	0.271494	0.282753	0.36966	0.263754	0.371117	-1.32936	-1.95984
MGH101-P4-F12	0.333667	0.321233	0.354634	0.249604	0.317501	-1.64134	-1.95783
MGH101-P4-G10	0.292158	0.25179	0.418764	0.27981	0.329133	0.0385289	-1.81247
MGH101-P4-E10	0.336173	0.356519	0.434538	0.195595	0.438328	-0.370819	-1.85618
MGH101-P4-A02	0.374048	0.260092	0.310563	0.327028	0.383629	-1.40046	-1.66803
MGH101-P2-D10	0.311008	0.366362	0.409266	0.289397	0.34642	-0.503735	-1.72962
MGH101-P3-G11	0.433367	0.307947	0.379181	0.249266	0.310225	-1.54042	-1.62789
MGH101-P4-G12	0.397012	0.412376	0.368293	0.321067	0.503164	-1.50216	-1.88194
MGH101-P4-A05	0.291693	0.294016	0.372398	0.253689	0.298079	-0.137061	-1.82165
MGH101-P3-A02	0.381898	0.337622	0.258234	0.408448	0.632499	-0.493815	-1.45454
MGH101-P2-C09	0.301164	0.29315	0.333452	0.417872	0.376817	-0.0458081	-1.30019
MGH101-P3-D08	0.420616	0.290093	0.41932	0.226897	0.474319	-1.96394	-1.81206
MGH101-P2-B01	0.423183	0.260362	0.311316	0.275299	0.469696	-1.66869	-1.57451
MGH101-P2-D11	0.40751	0.222849	0.334761	0.273934	0.423818	-1.62354	-1.43083
MGH101-P3-F12	0.431204	0.280633	0.29895	0.319269	0.428794	-0.884117	-1.31542
MGH101-P4-H02	0.301416	0.379021	0.583315	0.219295	0.481271	1.00862	-2.03827
MGH101-P4-F09	0.210959	0.405641	0.52639	0.224934	0.231141	2.1994	-2.2387
MGH101-P3-G06	0.291179	0.515058	0.580546	0.356926	0.151369	2.34798	-2.33835
MGH101-P3-B11	0.419069	0.288646	0.341268	0.197268	0.612611	-0.679738	-1.44688
MGH101-P4-C10	0.283642	0.324161	0.325809	0.367699	0.398415	-1.18065	-1.82177
MGH101-P3-G02	0.287113	0.294187	0.337105	0.352337	0.37578	-0.677811	-1.6343
MGH101-P4-C07	0.327084	0.302394	0.355342	0.2689	0.25916	0.302958	-0.842049
MGH101-P4-D04	0.326118	0.36719	0.390273	0.367035	0.35644	0.391924	-0.381515
MGH101-P3-D12	0.386563	0.344977	0.356325	0.309231	0.424805	-1.94668	-1.87885
MGH101-P4-E11	0.446918	0.262179	0.35576	0.351108	0.484821	-1.46154	-1.6898
MGH101-P3-D09	0.354875	0.293368	0.466212	0.282808	0.382224	-0.0239075	-1.58257
MGH101-P4-A03	0.350231	0.316071	0.470289	0.385269	0.31566	-0.788429	-1.51846
MGH101-P2-F11	0.365457	0.351507	0.452594	0.342672	0.361649	-0.682479	-1.50439
MGH101-P3-D10	0.400104	0.375247	0.486439	0.308997	0.348921	0.414973	-1.49439
MGH101-P4-B06	0.331938	0.325264	0.327302	0.190042	0.521234	-1.39122	-2.04949
MGH101-P3-F06	0.374747	0.286844	0.392654	0.411906	0.453242	-1.50723	-1.72089
MGH101-P3-F02	0.316224	0.267038	0.411414	0.255787	0.41321	-0.991146	-1.51325
MGH101-P3-G09	0.464994	0.267212	0.259146	0.436388	0.288463	-1.22424	-1.26901
MGH101-P3-F03	0.46958	0.330105	0.298816	0.262238	0.547795	-0.909033	-0.720016
MGH101-P4-H03	0.471496	0.298076	0.308346	0.272379	0.375031	-1.36087	-1.47008
MGH101-P3-C05	0.461929	0.312213	0.280884	0.268573	0.649395	-1.523	-1.30873
MGH101-P4-C12	0.368853	0.247634	0.381571	0.361848	0.45655	-1.18412	0.044069
MGH101-P3-A03	0.320455	0.295858	0.37204	0.23222	0.340128	-0.166675	-1.54739
MGH101-P3-A06	0.290982	0.259137	0.320184	0.391224	0.290102	-1.17636	-1.71556
MGH101-P3-F05	0.352938	0.306248	0.380812	0.381791	0.385398	-1.8417	-1.39524
MGH101-P4-G06	0.308538	0.282786	0.342985	0.340882	0.232049	-0.617174	-1.39162
MGH101-P4-D02	0.380632	0.286175	0.356739	0.376982	0.270537	-0.444262	-1.49552
MGH101-P3-D02	0.249733	0.247345	0.442367	0.290271	0.470292	-1.11598	-1.62115
MGH101-P3-E07	0.361026	0.296966	0.31292	0.598304	0.544292	-0.362011	-0.569187
MGH101-P3-H06	0.374221	0.349091	0.414019	0.305069	0.357151	-0.667104	-1.52302
MGH101-P2-E09	0.353046	0.302806	0.308886	0.247459	0.350588	-1.42749	-1.63699
MGH101-P3-E03	0.257174	0.41308	0.471211	0.315895	0.211221	1.779	-1.86857
MGH101-P2-F03	0.217645	0.341467	0.463312	0.268109	0.414523	0.527424	-1.93605
MGH101-P2-F10	0.370376	0.26897	0.353465	0.361345	0.445715	-1.6493	-1.94616
MGH101-P4-H07	0.356877	0.262667	0.438317	0.342374	0.552975	-1.80894	-1.62232
MGH101-P3-B06	0.410199	0.317075	0.368004	0.301664	0.484774	-1.48556	-1.72775
MGH101-P3-G10	0.511195	0.305805	0.45791	0.293201	0.515143	-0.862585	-1.87027
MGH101-P2-E08	0.291032	0.242292	0.345155	0.335593	0.277576	-1.03081	-1.07958
MGH101-P4-B07	0.168037	0.307409	0.5292	0.238007	0.309391	0.452919	-1.60624
MGH101-P3-D11	0.270129	0.463901	0.50302	0.172534	0.367583	1.37352	-2.14587
MGH101-P3-B10	0.369464	0.376421	0.311696	0.359598	0.464062	-0.315644	-1.70075
MGH101-P4-H09	0.274733	0.380315	0.401616	0.292905	0.449099	1.33465	-2.18918
MGH101-P4-D07	0.241257	0.313744	0.400097	0.223977	0.370163	-0.684127	-1.86745
MGH101-P4-G01	0.282201	0.323066	0.518446	0.318792	0.373608	1.20569	-1.82911
MGH101-P2-D04	0.292559	0.320849	0.407355	0.419599	0.401355	-0.0733845	-1.34068
MGH101-P3-E09	0.272195	0.355966	0.427032	0.321221	0.307509	0.480175	-1.72121
MGH101-P2-E11	0.373621	0.292516	0.374539	0.245488	0.303952	-1.41925	-1.3445
MGH101-P2-E01	0.29684	0.248471	0.381611	0.244987	0.385157	-1.34958	-1.47377
MGH101-P3-E05	0.431804	0.253436	0.351459	0.405246	0.411205	0.102487	0.76594
MGH101-P4-C09	0.349478	0.235211	0.423429	0.31653	0.26314	-1.25889	-0.573198
MGH101-P3-A09	0.329705	0.326495	0.385545	0.23028	0.161932	0.472473	-1.51684
MGH101-P3-C03	0.303138	0.300415	0.302879	0.313991	0.417099	0.549967	-1.20851
MGH101-P3-G05	0.249936	0.235621	0.381451	0.300642	0.15347	1.13441	-0.988163
MGH101-P3-A10	0.392994	0.298444	0.359846	0.217267	0.46513	-1.85287	-2.09505
MGH101-P4-G08	0.326848	0.29743	0.401714	0.229605	0.460035	-1.14796	-1.61251
MGH101-P4-B10	0.326913	0.299629	0.367762	0.451147	0.550491	-0.360732	-1.14049
MGH101-P3-G01	0.308839	0.271938	0.343721	0.221212	0.257848	-1.2814	-1.73418
MGH101-P3-B04	0.330935	0.345546	0.451845	0.230494	0.580479	0.376807	-1.38638
MGH101-P2-G11	0.372256	0.388584	0.448277	0.323948	0.452325	-0.864894	-1.31306
MGH101-P3-C01	0.313959	0.316793	0.487706	0.254373	0.339898	0.48354	-1.52843
MGH101-P2-D09	0.235415	0.371663	0.537336	0.31959	0.168933	1.09793	-1.84769
MGH101-P4-C02	0.30561	0.245076	0.372523	0.28488	0.263276	-0.96654	-1.48318
MGH101-P3-G07	0.288797	0.259835	0.401683	0.271809	0.397055	-0.940943	-1.15266
MGH101-P3-E01	0.312196	0.21988	0.413239	0.26961	0.435422	-0.441937	-0.869795
MGH101-P4-C11	0.230454	0.3091	0.472787	0.239253	0.117648	-1.2259	-1.70501
MGH101-P2-F04	0.33405	0.291468	0.316297	0.237408	0.477589	-1.51232	-2.01534
MGH101-P3-C07	0.270217	0.297182	0.470372	0.426816	0.317259	1.10107	-1.96478
MGH101-P4-H12	0.448735	0.316925	0.388319	0.185754	0.439012	-0.718891	-1.16864
MGH101-P2-C06	0.221011	0.46691	0.49107	0.272792	0.265261	1.18877	-1.83722
MGH101-P3-B01	0.378555	0.261587	0.317036	0.408043	0.334305	-1.72833	-1.75732
MGH101-P2-H12	0.380131	0.275108	0.369493	0.44382	0.2815	-1.30567	-1.31693
MGH101-P2-B07	0.270317	0.304997	0.373369	0.248601	0.30533	-0.295947	-1.56965
MGH101-P2-A04	0.259895	0.426953	0.443936	0.402407	0.311383	0.546155	-1.91827
MGH101-P3-E08	0.384944	0.337045	0.293988	0.299943	0.351235	-0.428815	-1.13584
MGH101-P2-A08	0.306434	0.253082	0.314915	0.31888	0.569952	-1.60311	-1.71197
MGH101-P3-G12	0.366641	0.256604	0.315847	0.234282	0.353236	-1.48331	-1.18491
MGH101-P2-F12	0.292265	0.339953	0.327727	0.444385	0.350307	-0.781718	-1.5868
MGH101-P3-H10	0.336408	0.422533	0.371021	0.359545	0.48223	0.924089	-1.98691
MGH101-P3-F01	0.423147	0.294887	0.240102	0.228187	0.473042	-1.55511	-1.478
MGH101-P2-C11	0.316453	0.285581	0.337416	0.268153	0.190148	-1.16173	-1.76087
MGH101-P4-H06	0.378658	0.307342	0.331281	0.250801	0.547993	-1.89923	-2.0034
MGH101-P4-B12	0.278216	0.395789	0.688233	0.246557	0.337468	1.12875	-2.02703
MGH101-P3-A12	0.279843	0.32587	0.383235	0.29409	0.237313	0.0905146	-1.54874
MGH101-P3-H09	0.354549	0.311861	0.481566	0.20583	0.426561	-0.597282	-1.74187
MGH101-P4-E05	0.388767	0.37195	0.393338	0.481217	0.196975	-0.125371	-1.30248
MGH101-P4-B03	0.285862	0.265616	0.333183	0.252596	0.485902	0.622202	-1.03481
MGH101-P2-C07	0.284303	0.3025	0.392337	0.41771	0.183535	-0.882766	-1.5486
MGH101-P4-F04	0.206472	0.359534	0.589214	0.29775	0.214689	1.13132	-1.78214
MGH101-P3-H03	0.348349	0.380824	0.310688	0.351482	0.342082	0.0950886	-1.41512
MGH102-P3-B04	0.692198	0.326089	0.316175	0.483615	0.497323	2.02697	1.7333
MGH102-P3-A05	0.688511	0.178664	0.23037	0.476449	0.44141	1.78555	1.93348
MGH102-P3-E02	0.639575	0.220755	0.275684	0.436917	0.506851	0.734074	0.606437
MGH102-P4-D08	0.497415	0.231791	0.283748	0.522611	0.453234	1.33909	-1.09688
MGH102-P4-A07	0.50486	0.243472	0.425424	0.527764	0.52418	-0.958285	0.536282
MGH102-P3-D11	0.699044	0.254454	0.281704	0.873361	0.300963	-1.41584	2.13575
MGH102-P5-D03	0.567125	0.236144	0.224954	0.721519	0.260376	-1.608	1.82346
MGH102-P1-C02	0.398033	0.288788	0.288783	0.522679	0.303835	0.777732	-0.551383
MGH102-P3-F06	0.633123	0.209923	0.279673	0.873813	0.418698	-1.34964	2.00509
MGH102-P4-E07	0.540846	0.249412	0.246749	0.71966	0.334175	-1.60169	2.10723
MGH102-P3-F07	0.657038	0.29029	0.30694	0.776016	0.321565	-1.29281	1.38557
MGH102-P1-F01	0.632045	0.164321	0.271062	0.534982	0.31912	2.03222	1.68623
MGH102-P1-H07	0.431161	0.216839	0.312355	0.377591	0.498966	0.587124	-0.0657735
MGH102-P4-F02	0.421958	0.162985	0.351457	0.625892	0.321154	1.91412	1.64502
MGH102-P3-C12	0.731689	0.255829	0.250692	0.841386	0.470267	1.5276	1.56186
MGH102-P1-H10	0.633855	0.243262	0.253218	0.553664	0.16049	1.56054	1.77629
MGH102-P1-D01	0.751245	0.186519	0.271891	0.54457	0.328457	2.13217	2.29417
MGH102-P4-H06	0.591285	0.169315	0.298612	0.609608	0.270708	1.64434	1.69165
MGH102-P5-G12	0.518243	0.178296	0.303167	0.505308	0.126124	2.16096	2.15001
MGH102-P1-D07	0.678352	0.205722	0.244922	0.645076	0.282614	2.31073	2.01659
MGH102-P1-E10	0.577608	0.318876	0.221313	0.718483	0.357529	-0.993154	1.65929
MGH102-P3-F04	0.607247	0.200136	0.263357	0.722852	0.197812	-1.0563	1.83477
MGH102-P3-F05	0.773395	0.247222	0.187178	0.825039	0.368831	-1.25522	1.99954
MGH102-P3-A09	0.451582	0.248244	0.25154	0.367304	0.591498	-1.54393	-1.50397
MGH102-P1-F02	0.648637	0.286086	0.162456	0.783138	0.327589	-1.31122	1.98375
MGH102-P3-E12	0.706198	0.28491	0.170709	0.819277	0.327739	-1.20879	2.04092
MGH102-P4-C06	0.743104	0.303888	0.223607	0.741218	0.281223	-0.59303	1.5057
MGH102-P4-B04	0.500081	0.122783	0.341281	0.754849	0.2696	-1.1953	2.16365
MGH102-P5-D12	0.754673	0.283577	0.200209	0.567857	0.462709	-0.658838	1.08103
MGH102-P3-H09	0.663509	0.306731	0.151118	0.806536	0.353827	-1.45511	1.96553
MGH102-P1-F06	0.807648	0.307129	0.217302	0.883424	0.257918	-1.39542	2.10021
MGH102-P4-A12	0.579918	0.335372	0.223807	0.723153	0.340396	-1.48105	2.12808
MGH102-P1-D09	0.656254	0.265504	0.268273	0.699236	0.364786	-1.10492	1.94329
MGH102-P1-A05	0.651923	0.221995	0.285413	0.895232	0.337769	-1.04599	1.72757
MGH102-P1-F04	0.595463	0.287956	0.272578	0.694795	0.321412	-1.72367	2.03356
MGH102-P3-H10	0.583029	0.263413	0.215945	0.702923	0.166297	-0.760453	1.9203
MGH102-P5-A06	0.618834	0.193476	0.258808	0.67495	0.314	0.326943	1.46743
MGH102-P3-C09	0.651713	0.292322	0.099728	0.778	0.274794	-1.34337	1.8952
MGH102-P3-G07	0.753873	0.302001	0.197788	0.835307	0.369676	-1.02389	1.90648
MGH102-P3-D08	0.624278	0.188313	0.330933	0.643937	0.20785	0.883793	0.856554
MGH102-P1-E11	0.633654	0.343312	0.313149	0.726587	0.250822	-1.01065	1.50899
MGH102-P4-F12	0.679553	0.268868	0.205623	0.526206	0.569378	-1.56441	-1.01121
MGH102-P4-B03	0.46674	0.152867	0.279408	0.555618	0.216894	1.51832	1.08748
MGH102-P3-B02	0.50544	0.178392	0.318144	0.506866	0.311574	1.37185	1.27059
MGH102-P4-E09	0.519602	0.17175	0.377312	0.640872	0.236327	1.51632	1.45918
MGH102-P3-B03	0.597017	0.218689	0.17186	0.470151	0.306407	1.48905	1.52665
MGH102-P4-B07	0.599499	0.254171	0.201824	0.813304	0.400757	-1.57755	2.10193
MGH102-P3-E04	0.526632	0.167539	0.448792	0.79683	0.133421	-0.646645	1.63833
MGH102-P4-E03	0.462459	0.186414	0.262944	0.498487	0.468332	-1.83633	-1.23323
MGH102-P3-A03	0.659474	0.178085	0.259577	0.799984	0.266222	-1.47585	2.04357
MGH102-P1-A02	0.649948	0.199744	0.262752	0.681801	0.245071	2.02352	1.86522
MGH102-P1-B01	0.375985	0.120682	0.370479	0.429821	0.296256	1.93765	1.93806
MGH102-P5-A11	0.432725	0.173416	0.361125	0.670911	0.270946	1.72088	1.71371
MGH102-P5-G10	0.693659	0.262009	0.233561	0.525092	0.237481	1.79089	1.96591
MGH102-P3-H02	0.516084	0.229204	0.26034	0.666308	0.186725	0.29501	1.27858
MGH102-P4-G11	0.55945	0.154539	0.290845	0.715661	0.301678	2.04598	2.15894
MGH102-P3-F03	0.689154	0.262337	0.221768	0.839582	0.364092	-1.31341	1.88479
MGH102-P3-G05	0.710024	0.248724	0.234803	0.63037	0.330856	2.05599	1.86413
MGH102-P3-D12	0.635678	0.161706	0.249823	0.610451	0.290795	2.32727	2.2414
MGH102-P1-F05	0.682663	0.209218	0.245557	0.58643	0.39792	2.22543	2.07228
MGH102-P3-G01	0.461873	0.166683	0.296089	0.56649	0.132624	2.10539	2.11531
MGH102-P5-G04	0.463565	0.145758	0.259727	0.520785	0.232435	1.92259	1.85211
MGH102-P5-A02	0.522476	0.253184	0.301548	0.729541	0.233	-0.728222	1.54279
MGH102-P5-E05	0.414062	0.222265	0.184421	0.725372	0.298201	-0.103751	1.10547
MGH102-P5-G09	0.611809	0.213463	0.195717	0.729515	0.328646	2.28012	2.13854
MGH102-P5-B11	0.490472	0.07007	0.308422	0.602597	0.16887	1.99041	1.8908
MGH102-P4-B05	0.428173	0.111508	0.3114	0.594952	0.21747	1.98429	1.90016
MGH102-P3-E11	0.472777	0.196117	0.320001	0.579432	0.285058	2.19179	2.07513
MGH102-P4-E01	0.492326	0.137563	0.33488	0.484441	0.255314	2.29214	1.93536
MGH102-P4-B12	0.391003	0.0934113	0.381468	0.568595	0.251903	1.80757	1.85419
MGH102-P1-H12	0.52768	0.188713	0.488814	0.607517	0.170726	2.09333	1.9091
MGH102-P1-A03	0.495397	0.148217	0.313626	0.587994	0.192724	2.21772	2.01347
MGH102-P1-G10	0.549487	0.0842471	0.260545	0.498178	0.342577	1.68597	1.90952
MGH102-P4-A08	0.443999	0.164097	0.287314	0.501194	0.123852	0.761871	1.40648
MGH102-P3-H07	0.641639	0.228457	0.209966	0.769602	0.250903	-0.232804	1.37431
MGH102-P4-H05	0.370361	0.148695	0.287796	0.354459	0.451111	-0.852564	-0.250263
MGH102-P4-E05	0.417776	0.184332	0.298858	0.291646	0.390733	0.992941	0.460746
MGH102-P5-C10	0.445651	0.200093	0.407014	0.545819	0.319256	1.32498	0.451398
MGH102-P5-F03	0.635328	0.241638	0.162375	0.663257	0.335504	1.15053	0.892152
MGH102-P3-E10	0.720624	0.19825	0.123961	0.580922	0.463664	0.649352	1.32313
MGH102-P5-G02	0.489938	0.146469	0.265504	0.559003	0.143237	2.08049	1.69781
MGH102-P5-B07	0.777084	0.254744	0.121887	0.610758	0.270077	2.21753	1.72678
MGH102-P1-C03	0.604871	0.155685	0.23089	0.387109	0.272466	0.654907	0.87322
MGH102-P4-F05	0.398018	0.0687168	0.326068	0.365799	0.327865	1.45581	1.70421
MGH102-P3-F12	0.550672	0.192485	0.180773	0.633764	0.269997	1.35266	0.806203
MGH102-P4-F08	0.352749	0.189986	0.310623	0.339027	0.22817	2.14532	1.87367
MGH102-P3-F11	0.585483	0.170543	0.28813	0.637309	0.260889	2.23367	2.02708
MGH102-P5-H03	0.529844	0.21383	0.188625	0.381032	0.24023	0.90103	1.25069
MGH102-P5-F01	0.419314	0.136577	0.359595	0.53783	0.222239	1.30521	1.19215
MGH102-P3-B07	0.65376	0.275999	0.276838	0.504231	0.561147	-1.1365	-0.560996
MGH102-P4-H10	0.604044	0.171521	0.225271	0.717556	0.20495	1.20839	1.37255
MGH102-P5-E08	0.664593	0.169941	0.181063	0.588852	0.291352	1.99461	1.68999
MGH102-P3-G10	0.485139	0.121176	0.279407	0.499977	0.308215	1.30775	1.45386
MGH102-P5-C11	0.517204	0.217306	0.27741	0.601392	0.170275	2.29909	2.07329
MGH102-P3-F01	0.640854	0.181384	0.254834	0.579766	0.233314	1.87912	1.82917
MGH102-P5-A08	0.485347	0.128372	0.265507	0.700693	0.120731	2.28222	2.2304
MGH102-P3-H08	0.663762	0.160174	0.180557	0.68754	0.362249	2.4478	2.03153
MGH102-P1-F07	0.611717	0.196649	0.284371	0.668308	0.15064	2.38846	2.22906
MGH102-P1-A07	0.574622	0.0926741	0.280753	0.4263	0.167127	1.11585	1.54885
MGH102-P4-H09	0.465758	0.194357	0.311696	0.489645	0.427633	0.309793	0.224788
MGH102-P5-B02	0.351857	0.0876885	0.342769	0.507324	0.327947	1.4354	1.59594
MGH102-P3-F10	0.530096	0.178849	0.289083	0.478699	0.274033	1.55839	1.55706
MGH102-P4-D05	0.423942	0.0950235	0.280052	0.495669	0.301517	1.63007	1.6136
MGH102-P4-G09	0.67514	0.205262	0.219033	0.605276	0.310912	1.35936	1.51154
MGH102-P3-H06	0.664075	0.170068	0.381958	0.439174	0.574836	0.447175	0.115889
MGH102-P3-D09	0.561421	0.159669	0.330629	0.544527	0.316621	2.4695	2.30642
MGH102-P5-H04	0.536178	0.188344	0.263509	0.573162	0.25307	2.52472	2.21901
MGH102-P4-C05	0.416669	0.105172	0.282776	0.575371	0.0103255	1.20566	1.58429
MGH102-P1-B11	0.630674	0.165897	0.246164	0.614751	0.224656	2.35581	2.15343
MGH102-P3-B09	0.581797	0.197308	0.401759	0.640003	0.215316	2.33101	2.08148
MGH102-P4-H12	0.44172	0.169932	0.277924	0.537283	0.15822	1.389	1.54047
MGH102-P3-C05	0.504463	0.15363	0.318555	0.435368	0.37989	1.55675	1.60242
MGH102-P4-D01	0.496549	0.116361	0.249089	0.531905	0.312032	1.862	1.79405
MGH102-P3-C04	0.514049	0.190781	0.262098	0.52415	0.288444	1.3276	1.55774
MGH102-P3-C08	0.533331	0.188564	0.240618	0.663497	0.311565	1.26929	1.22201
MGH102-P3-A10	0.562082	0.211705	0.283388	0.336731	0.383468	0.858933	1.48717
MGH102-P5-G03	0.437877	0.130041	0.282441	0.56553	0.261512	2.33134	1.97169
MGH102-P3-B08	0.480406	0.236379	0.307971	0.470971	0.312203	2.06472	0.419207
MGH102-P5-F12	0.452301	0.178671	0.233884	0.457024	0.287487	1.27585	1.24334
MGH102-P3-A11	0.523089	0.267137	0.207003	0.469787	0.257283	2.09298	0.534234
MGH102-P3-E05	0.605719	0.162896	0.2528	0.389745	0.501877	0.815945	0.766374
MGH102-P5-F06	0.670343	0.133983	0.230957	0.503472	0.34529	1.79339	1.68979
MGH102-P1-D03	0.522137	0.253106	0.182192	0.567355	0.321004	2.23964	1.3623
MGH102-P4-D03	0.560837	0.23106	0.247564	0.583065	0.224936	1.21482	1.44816
MGH102-P1-H02	0.512319	0.146883	0.28851	0.616892	0.236581	1.88267	2.04243
MGH102-P4-A06	0.628425	0.210177	0.278104	0.597806	0.289621	1.12411	0.758836
MGH102-P4-B06	0.557992	0.192094	0.344591	0.49877	0.494211	1.20195	1.37247
MGH102-P1-F10	0.669508	0.253732	0.1559	0.474794	0.232025	1.83728	1.84689
MGH102-P1-F12	0.598658	0.205094	0.267233	0.414432	0.126928	2.46231	2.31011
MGH102-P5-D11	0.56155	0.139912	0.281392	0.538665	0.280259	1.33477	0.924347
MGH102-P3-F02	0.650042	0.111357	0.360497	0.562487	0.271535	1.72787	1.68913
MGH102-P5-F11	0.553147	0.203563	0.208446	0.508862	0.10847	2.48691	2.21878
MGH102-P3-A07	0.552862	0.180756	0.306667	0.568083	0.344654	1.02941	1.43129
MGH102-P3-B06	0.491487	0.260059	0.205898	0.501138	0.389178	2.2191	1.85484
MGH102-P4-G03	0.593422	0.17517	0.306696	0.661685	0.250208	1.15083	1.16478
MGH102-P3-G08	0.496435	0.266561	0.313489	0.47539	0.364314	1.55239	1.20042
MGH102-P5-F04	0.526747	0.152071	0.253461	0.513761	0.224572	1.38466	1.56584
MGH102-P3-B01	0.673775	0.131678	0.241469	0.599704	0.239245	0.931561	1.28901
MGH102-P5-G08	0.58583	0.193586	0.191327	0.56053	0.162991	2.47101	2.34654
MGH102-P3-F08	0.62285	0.140146	0.366132	0.459342	0.24802	2.32334	2.09458
MGH102-P3-G04	0.376452	0.213091	0.327296	0.454855	0.0428302	2.25009	1.79786
MGH102-P3-A08	0.415601	0.157112	0.34331	0.51383	0.297024	0.81844	1.14762
MGH102-P5-B04	0.253394	0.138624	0.332483	0.329418	0.175667	1.65024	0.183925
MGH102-P4-H07	0.384408	0.32571	0.291989	0.487342	0.28854	2.60256	-1.63741
MGH102-P4-A05	0.597513	0.151046	0.206609	0.342251	0.122177	1.7502	1.55421
MGH102-P4-D12	0.594574	0.184678	0.256688	0.671693	0.168124	1.6266	1.76505
MGH102-P4-H04	0.485694	0.151805	0.279483	0.51548	0.132997	1.25157	1.55366
MGH102-P4-B09	0.511136	0.0873699	0.257478	0.467437	0.311186	0.70871	0.740388
MGH102-P5-E09	0.473935	0.118252	0.243036	0.40538	0.184791	1.04358	1.73067
MGH102-P5-A07	0.489171	0.164511	0.31692	0.646468	0.201003	2.22195	2.10235
MGH102-P1-G01	0.543593	0.147311	0.251224	0.663785	0.111752	2.36974	2.20987
MGH102-P5-A10	0.661254	0.342058	0.272387	0.723963	0.427178	1.96132	1.46378
MGH102-P1-E04	0.623114	0.144567	0.217674	0.62503	0.101269	2.45057	2.32722
MGH102-P1-A12	0.591156	0.24544	0.178049	0.62841	0.348205	2.22093	1.38475
MGH102-P5-F05	0.590978	0.152547	0.248285	0.519448	0.308837	0.672741	0.372301
MGH102-P1-D02	0.494504	0.0970538	0.326161	0.263992	0.24633	0.716627	0.8786
MGH102-P1-A09	0.64714	0.208824	0.253789	0.488003	0.179207	2.32306	1.90225
MGH102-P3-C01	0.597719	0.198433	0.208712	0.651139	0.215158	1.64831	1.65597
MGH102-P3-D07	0.584898	0.212782	0.222505	0.533306	0.382154	-0.295938	0.58199
MGH102-P3-C03	0.627493	0.14988	0.183362	0.542957	0.30723	1.23658	1.46631
MGH102-P3-F09	0.701687	0.175099	0.204986	0.364792	0.467519	0.498525	0.182677
MGH102-P5-H12	0.315553	0.138711	0.318761	0.491976	0.27096	1.10092	1.4339
MGH102-P5-C02	0.459477	0.128178	0.284758	0.466412	0.33181	1.49978	1.53535
MGH102-P4-G06	0.431143	0.140704	0.297072	0.511955	0.112776	1.35953	1.524
MGH102-P1-G11	0.598496	0.163803	0.317488	0.548938	0.199861	1.40927	1.3624
MGH102-P5-E02	0.482535	0.116613	0.237497	0.562978	0.233269	1.66483	1.83775
MGH102-P3-G03	0.600629	0.154041	0.360347	0.412574	0.437934	-1.50705	-0.455167
MGH102-P4-G07	0.516801	0.144426	0.306607	0.552854	0.161347	2.4709	2.1348
MGH102-P5-D04	0.483068	0.109968	0.323339	0.61243	0.279851	1.43085	1.34715
MGH102-P3-D05	0.527734	0.192938	0.236076	0.558869	0.373998	2.07966	1.75158
MGH102-P5-B10	0.53673	0.163366	0.274305	0.537526	0.200608	2.5357	2.32187
MGH102-P5-G06	0.691569	0.320702	0.250895	0.687867	0.327228	2.23561	1.17541
MGH102-P3-C07	0.634381	0.149597	0.269632	0.476189	0.286408	2.44007	2.17387
MGH102-P1-F08	0.645812	0.171784	0.18362	0.56825	0.405937	2.0946	1.99918
MGH102-P5-C12	0.558522	0.250057	0.254657	0.433265	0.344126	1.67	1.6104
MGH102-P5-E10	0.559726	0.15666	0.254128	0.561588	0.392268	0.632196	1.35838
MGH102-P3-C02	0.594507	0.167294	0.27992	0.553503	0.311009	2.31476	1.93123
MGH102-P5-D05	0.668252	0.192096	0.2577	0.654993	0.28543	2.3304	1.79207
MGH102-P1-C07	0.531883	0.185749	0.277858	0.533745	0.372042	0.3605	0.0693918
MGH102-P4-H03	0.47467	0.140028	0.256703	0.481384	0.298116	1.47144	1.61307
MGH102-P5-F08	0.730742	0.311041	0.204922	0.602052	0.335993	2.20164	1.67691
MGH102-P4-B01	0.406437	0.0712012	0.288595	0.529728	0.22827	2.26377	2.16568
MGH102-P4-F01	0.442313	0.0803537	0.334485	0.490667	0.12798	2.05969	1.83141
MGH102-P3-B10	0.704142	0.0842128	0.329089	0.662515	0.387137	0.428276	1.73372
MGH102-P5-C03	0.588402	0.179915	0.328453	0.470434	0.394184	-0.23548	0.315892
MGH102-P1-D12	0.537439	0.131928	0.257513	0.491512	0.22156	2.28583	2.07411
MGH102-P4-D02	0.435003	0.0672382	0.344984	0.639079	0.290842	1.14266	1.28345
MGH102-P3-H01	0.473435	0.148177	0.25201	0.457891	0.509397	0.300567	0.94328
MGH102-P1-F11	0.526983	0.127887	0.309072	0.394369	0.301635	1.90857	1.73999
MGH102-P5-C04	0.466236	0.106263	0.363757	0.537939	0.206341	2.33172	1.72531
MGH102-P3-A01	0.58467	0.0514274	0.297484	0.664622	0.149677	2.26943	2.12864
MGH102-P3-H12	0.466414	0.175296	0.326176	0.49929	0.28357	1.68545	0.692955
MGH102-P1-A01	0.251616	0.0730006	0.356526	0.551937	0.280465	1.15708	0.101957
MGH102-P5-H06	0.508874	0.194802	0.289851	0.789984	0.34812	-1.16608	1.7024
MGH102-P5-G07	0.591613	0.210647	0.214777	0.707261	0.200053	-0.300163	2.03393
MGH102-P4-E02	0.563403	0.115589	0.275469	0.71076	0.241376	-0.415417	1.57393
MGH102-P3-C11	0.586177	0.231969	0.30939	0.784255	0.316452	0.348499	1.81598
MGH102-P3-E03	0.796325	0.191884	0.289448	0.71585	0.366931	-0.837788	1.86453
MGH102-P3-B12	0.633174	0.223735	0.242745	0.796565	0.458195	-0.705115	1.97821
MGH102-P1-B10	0.66541	0.238749	0.329582	0.678088	0.228398	2.14619	1.96978
MGH102-P1-D06	0.746408	0.142266	0.206337	0.566523	0.354979	2.27453	2.0057
MGH102-P1-E01	0.590976	0.255354	0.332672	0.539541	0.391292	2.0865	1.47258
MGH102-P1-H11	0.853843	0.261001	0.0683196	0.749003	0.435075	-0.631086	1.78063
MGH102-P3-H05	0.611451	0.236992	0.230425	0.700162	0.257889	-0.62322	1.59604
MGH102-P4-F06	0.281924	0.415446	0.414428	0.263083	0.149747	1.53238	-1.40772
MGH102-P1-G06	0.241292	0.320537	0.45603	0.282275	0.338119	2.05994	-1.87562
MGH104NEGP2-C06	0.314349	0.175334	0.373177	0.260935	0.35685	1.23608	-1.23923
MGH104NEGP7-D01	0.542897	0.293982	0.310821	0.222594	0.557528	-0.753106	-1.70002
MGH104NEGP7-D11	0.607275	0.333551	0.201365	0.11525	0.695041	-1.43147	-1.91441
MGH104NEGP7-D09	0.427562	0.33908	0.495307	0.203188	0.589753	1.39218	-1.65778
MGH104NEGP7-A03	0.343452	0.262346	0.409952	0.260722	0.363174	2.09668	-1.80234
MGH104NEGP4-B02	0.430795	0.257538	0.320756	0.255902	0.512031	-1.21162	-1.82243
MGH104NEGP7-A07	0.577103	0.203275	0.203416	0.308609	0.627794	-1.47769	-1.76335
MGH104NEGP2-E02	0.505444	0.189026	0.280337	0.311754	0.515702	-0.565192	-1.4159
MGH104-P5-D12	0.425377	0.298583	0.367442	0.348193	0.481985	-0.0732595	-1.35175
MGH104-P5-F07	0.562659	0.309032	0.335723	0.158405	0.762595	-0.796263	-1.75999
MGH104-P5-H06	0.364292	0.308594	0.323507	0.288811	0.453274	1.86095	-1.83108
MGH104-P5-B07	0.327635	0.304472	0.358091	0.190869	0.512331	-0.058877	-1.71211
MGH104-P5-A08	0.428508	0.405068	0.462097	0.246387	0.52414	1.80884	-2.14984
MGH104NEGP7-C09	0.457206	0.42157	0.617052	0.218907	0.610608	1.65625	-2.06758
MGH104NEGP4-D08	0.396669	0.300621	0.452593	0.21031	0.580961	0.906705	-2.08647
MGH104NEGP4-E06	0.456979	0.317018	0.249414	0.273346	0.581039	0.619208	-1.9343
MGH104NEGP7-C02	0.480802	0.247526	0.571559	0.288775	0.57253	2.01476	-2.28312
MGH104NEGP7-B03	0.564013	0.200878	0.277159	0.416295	0.550742	-0.729347	-1.23767
MGH104NEGP4-B03	0.575502	0.321653	0.355729	0.204171	0.640645	0.769577	-1.63552
MGH104-P6-A08	0.462324	0.281277	0.203476	0.412114	0.515284	0.909059	-0.316269
MGH104NEGP7-F04	0.508156	0.336839	0.276812	0.208296	0.660227	1.12461	-2.15455
MGH104NEGP7-C12	0.426705	0.462613	0.405702	0.250782	0.810267	0.034926	-1.6174
MGH104NEGP4-F04	0.472037	0.602967	0.407772	0.212111	0.694161	1.31535	-1.74109
MGH104NEGP7-B02	0.605771	0.219839	0.283726	0.331568	0.615937	-1.128	-1.25404
MGH104NEGP7-G08	0.481756	0.256424	0.259994	0.337891	0.734909	-0.257938	-1.3129
MGH104-P5-B04	0.610695	0.309633	0.231465	0.282419	0.687511	-0.152195	-1.23404
MGH104NEGP4-G06	0.520402	0.114758	0.227423	0.309252	0.345281	0.852201	1.10876
MGH104NEGP7-E02	0.635827	0.220103	0.227785	0.273497	0.796765	-1.67799	-1.39444
MGH104-P6-A09	0.340646	0.423644	0.425002	0.260991	0.556369	2.44098	-2.08838
MGH104NEGP4-B07	0.485795	0.445341	0.289135	0.177197	0.536527	1.11597	-2.19346
MGH104NEGP4-F03	0.628866	0.372644	0.354673	0.263816	0.771533	-0.507557	-1.70836
MGH104NEGP7-F09	0.600522	0.393064	0.207182	0.156817	0.686141	-1.05475	-1.85017
MGH104NEGP4-A12	0.556145	0.214928	0.282399	0.268917	0.584097	-1.19656	-1.37353
MGH104NEGP7-E08	0.526396	0.293799	0.410054	0.188389	0.595448	0.786007	-1.89708
MGH104-P5-H09	0.45709	0.233888	0.240492	0.410369	0.646765	0.765077	-1.38197
MGH104NEGP7-C04	0.658347	0.198099	0.161039	0.213982	0.65845	-0.622545	-0.228524
MGH104-P5-D05	0.601314	0.321804	0.300934	0.217168	0.710723	-0.537812	-1.41009
MGH104NEGP4-H05	0.400995	0.231522	0.312706	0.353613	0.42181	-1.13541	-1.53316
MGH104-P5-B10	0.331624	0.229987	0.210795	0.329129	0.626424	-0.795301	-0.776538
MGH104-P5-H04	0.519748	0.227267	0.320201	0.278695	0.600175	-1.08654	-1.78333
MGH104NEGP2-F12	0.42682	0.318884	0.297342	0.285083	0.634321	-0.568503	-1.73623
MGH104NEGP7-C08	0.586499	0.226075	0.2433	0.321993	0.722298	-1.67033	-1.35728
MGH104-P6-A03	0.311365	0.211811	0.351817	0.193743	0.424817	-0.97285	-1.41478
MGH104-P5-F08	0.546553	0.336177	0.253231	0.278377	0.745855	-0.614675	-0.731544
MGH104-P5-F12	0.317824	0.155726	0.247055	0.276915	0.395522	-0.711406	-1.09341
MGH104-P5-D10	0.585876	0.21277	0.356475	0.341814	0.645351	-1.07009	-1.07392
MGH104-P6-A04	0.158386	0.389368	0.4837	0.410636	0.511044	-0.137687	-1.7531
MGH104-P6-G03	0.417786	0.232884	0.244675	0.295579	0.493982	-1.7172	-1.43403
MGH104-P5-F05	0.541434	0.278278	0.306272	0.248432	0.530705	-0.70511	-1.77382
MGH104-P6-D05	0.751984	0.232501	0.192936	0.375553	0.838902	-1.65499	-1.06161
MGH104-P6-G04	0.17381	0.388148	0.463993	0.315127	0.622382	0.748611	-1.84013
MGH104-P6-A11	0.545859	0.247392	0.274069	0.123797	0.662651	-1.02843	-1.36585
MGH104NEGP7-G12	0.515442	0.10796	0.232605	0.527738	0.426453	-0.41085	0.41951
MGH104-P6-C03	0.785653	0.218574	0.11186	0.358181	0.692269	-1.55479	-1.18016
MGH104-P5-G06	0.594786	0.483255	0.387395	0.293318	0.711826	0.144265	-1.22183
MGH104-P6-G06	0.341113	0.27107	0.313697	0.240902	0.571461	-0.156235	-1.82075
MGH104NEGP7-B11	0.628756	0.380568	0.307187	0.17173	0.598723	-1.4492	-1.60175
MGH104NEGP2-H11	0.619182	0.318859	0.332814	0.31544	0.672118	-0.863816	-1.69188
MGH104-P5-G03	0.571933	0.263129	0.329484	0.363205	0.666087	-1.29346	-1.41244
MGH104-P5-B08	0.491192	0.427892	0.25685	0.200549	0.811107	-0.584485	-1.62735
MGH104-P5-C02	0.194626	0.27884	0.38217	0.383048	0.498881	-0.689924	-1.87574
MGH104-P6-C10	0.576426	0.316917	0.252247	0.315008	0.517432	-1.54305	-1.91606
MGH104-P5-G10	0.549099	0.246596	0.287996	0.478492	0.460172	-0.746988	-1.14569
MGH104-P5-H02	0.428658	0.417647	0.354057	0.304799	0.791067	-0.51786	-1.6441
MGH104-P5-C06	0.531533	0.259189	0.291675	0.339361	0.617436	-0.821025	-1.48966
MGH104-P5-D09	0.671875	0.34257	0.308949	0.122165	0.759216	-1.28815	-1.85836
MGH104NEGP2-E12	0.379791	0.581322	0.578295	0.137506	0.772516	0.865037	-2.01859
MGH104NEGP4-A09	0.364136	0.440137	0.450772	0.174601	0.550383	0.797496	-2.05291
MGH104-P6-B06	0.65155	0.401613	0.312158	0.217435	0.831629	-0.417354	-1.73436
MGH104NEGP7-G03	0.638939	0.259403	0.256455	0.271155	0.845983	-1.96532	-1.98861
MGH104-P6-C05	0.594033	0.266699	0.245844	0.27003	0.772969	-1.03143	-1.72775
MGH104-P5-H07	0.354372	0.511183	0.560277	0.284151	0.637448	0.774761	-1.76408
MGH104-P5-A06	0.419276	0.327316	0.405273	0.266423	0.480177	0.711477	-2.08455
MGH104-P6-A12	0.601544	0.306625	0.156731	0.348215	0.656558	0.202088	-1.01971
MGH104NEGP2-D04	0.572594	0.511886	0.505905	0.176303	0.760553	1.19583	-1.99813
MGH104-P6-A02	0.338874	0.290176	0.4279	0.438776	0.598213	-0.149731	-1.38489
MGH104-P5-A09	0.557384	0.338555	0.240736	0.358029	0.748526	-1.1606	-1.46639
MGH104NEGP7-G07	0.520155	0.336474	0.305741	0.224672	0.560937	0.406892	-1.59243
MGH104NEGP4-G12	0.482646	0.457208	0.252577	0.271364	0.626219	0.939385	-1.27478
MGH104NEGP2-F08	0.565636	0.285591	0.364605	0.0914574	0.655846	1.44892	-1.92631
MGH104NEGP4-D06	0.403315	0.296818	0.285988	0.273336	0.569842	0.585584	-1.90156
MGH104-P6-C09	0.510194	0.441162	0.390299	0.257127	0.661949	-0.537449	-1.62529
MGH104-P6-G01	0.492422	0.232688	0.305766	0.21817	0.760102	-1.10655	-0.999063
MGH104NEGP2-E01	0.5769	0.399275	0.330363	0.139977	0.622313	-0.319686	-1.39474
MGH104NEGP2-E05	0.496729	0.37214	0.263175	0.26674	0.528337	0.984703	-1.27783
MGH104NEGP2-G01	0.528636	0.347592	0.345302	0.105807	0.5433	-0.378736	-1.03207
MGH104-P5-D01	0.418202	0.482287	0.416309	0.224266	0.401133	1.69213	-1.70827
MGH104NEGP7-F07	0.379817	0.240065	0.330811	0.212132	0.607275	1.27137	-1.88729
MGH104NEGP7-E11	0.573877	0.305683	0.301842	0.296974	0.732542	-1.44192	-1.70276
MGH104-P6-D03	0.663777	0.235923	0.244645	0.320466	0.649404	-1.67856	-1.7967
MGH104NEGP7-A01	0.543264	0.231633	0.264018	0.232794	0.685167	-1.53861	-0.763687
MGH104NEGP2-D07	0.613238	0.24605	0.295144	0.268708	0.532453	-1.52951	-1.53844
MGH104NEGP2-H02	0.488278	0.342901	0.280136	0.312421	0.598929	-0.154316	-1.65987
MGH104NEGP2-A07	0.583631	0.326429	0.331429	0.366123	0.656972	-1.41074	-1.37876
MGH104NEGP2-G03	0.550831	0.343505	0.303655	0.180861	0.579696	-1.26816	-1.79559
MGH104-P5-B02	0.56784	0.327132	0.14164	0.32343	0.779477	0.166636	-1.52538
MGH104-P5-C04	0.605466	0.306039	0.440722	0.383677	0.749548	-1.34937	-1.29643
MGH104-P5-C05	0.412199	0.333808	0.248622	0.34592	0.64471	0.0488699	-1.50695
MGH104NEGP2-G12	0.565402	0.213783	0.225232	0.224472	0.618626	-1.20791	-1.58259
MGH104NEGP4-C06	0.471607	0.479372	0.397454	0.220824	0.659713	-0.546126	-1.39835
MGH104-P6-F06	0.344597	0.340551	0.381505	0.214837	0.517704	0.396094	-1.63695
MGH104-P5-H05	0.35268	0.438415	0.329978	0.22971	0.573766	1.12136	-1.72246
MGH104-P5-G04	0.339858	0.474139	0.435268	0.2618	0.603468	1.34064	-2.04213
MGH104-P5-E04	0.599228	0.306346	0.365793	0.112032	0.710893	-1.26051	-1.57968
MGH104NEGP7-F05	0.415661	0.382409	0.358696	0.203831	0.466741	1.51843	-2.08004
MGH104NEGP2-H05	0.557235	0.374541	0.25405	0.236453	0.736399	-0.778058	-1.66606
MGH104-P5-E07	0.629689	0.271462	0.177482	0.35135	0.580238	-1.15417	-1.4444
MGH104NEGP7-E05	0.367332	0.407343	0.395343	0.263148	0.654209	-0.210097	-1.63505
MGH104NEGP7-G02	0.514006	0.360504	0.554284	0.11041	0.801575	-0.449158	-1.88012
MGH104NEGP2-G02	0.581111	0.410053	0.329739	0.139317	0.786108	-0.173493	-1.79698
MGH104NEGP2-B03	0.552384	0.286721	0.432333	0.223295	0.513487	0.241859	-1.22025
MGH104NEGP4-E02	0.732724	0.408976	0.175661	0.287116	0.795595	0.229954	-1.35429
MGH104NEGP7-C05	0.540899	0.252683	0.371073	0.182149	0.567629	-0.74826	-1.65023
MGH104NEGP4-C07	0.563651	0.323714	0.339134	0.228586	0.695784	-0.733997	-1.16674
MGH104NEGP4-E04	0.468731	0.474651	0.39703	0.18828	0.655649	0.295188	-1.77253
MGH104NEGP7-H04	0.47968	0.377823	0.212557	0.279372	0.571536	-0.194648	-1.23076
MGH104NEGP2-A11	0.50247	0.355317	0.380396	0.429166	0.625537	-0.392531	-1.25802
MGH104NEGP4-E07	0.612842	0.333019	0.299964	0.373438	0.757318	-0.856147	-0.821029
MGH104NEGP7-A05	0.481375	0.385489	0.226716	0.429877	0.451335	-0.245818	-1.36818
MGH104NEGP2-D01	0.561766	0.367448	0.317988	0.283088	0.72734	-0.603366	-1.52178
MGH104NEGP4-E10	0.659979	0.416352	0.288774	0.347478	0.737647	-0.701512	-1.42388
MGH104NEGP2-C11	0.581287	0.340402	0.163138	0.362483	0.800542	-0.84352	-1.66413
MGH104-P5-C07	0.530356	0.30938	0.324334	0.228204	0.701335	0.218025	-1.09391
MGH104NEGP7-E01	0.586083	0.354906	0.315339	0.235605	0.796941	-1.07478	-1.73679
MGH104-P6-G07	0.437046	0.228492	0.394027	0.298146	0.505101	-1.01224	-1.20274
MGH104NEGP7-E09	0.589805	0.281394	0.194432	0.296159	0.774043	-0.76699	-1.24332
MGH104NEGP4-G09	0.562801	0.272004	0.405576	0.339078	0.666251	-0.424389	-1.45714
MGH104NEGP7-F08	0.348838	0.578967	0.515823	0.0915505	0.646486	1.24071	-2.03683
MGH104NEGP2-C03	0.575444	0.264352	0.202804	0.367112	0.603322	-0.838328	-1.42862
MGH104NEGP2-H12	0.55758	0.296119	0.248612	0.229389	0.675507	-0.454551	-1.4068
MGH104NEGP2-F01	0.461373	0.239455	0.287681	0.268949	0.541654	-0.0562533	-1.64424
MGH104-P5-G08	0.52255	0.309829	0.173629	0.300991	0.753314	-0.841074	-1.62876
MGH104-P5-A12	0.485779	0.332685	0.28692	0.327007	0.538823	-0.467079	-1.13857
MGH104NEGP4-D11	0.693857	0.321913	0.256828	0.405422	0.794197	-0.96723	-1.54034
MGH104NEGP7-H03	0.471664	0.210015	0.307931	0.324259	0.603843	-0.745867	-0.849552
MGH104NEGP4-A03	0.58579	0.322073	0.241571	0.151638	0.601314	-1.08066	-1.75279
MGH104NEGP7-G01	0.522682	0.325703	0.260553	0.303943	0.773972	-0.878435	-1.40253
MGH104NEGP7-B07	0.51765	0.398827	0.167881	0.284337	0.762843	-0.0653462	-1.53137
MGH104NEGP2-B08	0.698026	0.308464	0.249526	0.288247	0.605141	-0.955501	-1.51765
MGH104NEGP7-C03	0.548278	0.263557	0.352293	0.293881	0.608322	-1.18498	-1.14062
MGH104NEGP2-A12	0.380813	0.417044	0.442647	0.339888	0.660891	1.0539	-1.80838
MGH104NEGP7-H12	0.530448	0.412833	0.406229	0.356757	0.669215	1.05557	-1.87888
MGH104NEGP7-G06	0.309266	0.307323	0.519587	0.258211	0.434433	1.95706	-2.13309
MGH104NEGP4-A06	0.62743	0.407971	0.332886	0.241165	0.693181	-1.45371	-1.83174
MGH104NEGP4-G03	0.571412	0.277423	0.160339	0.248298	0.660571	-1.2302	-1.49733
MGH104NEGP7-E06	0.49416	0.270641	0.26498	0.261363	0.583109	-0.443742	-1.56057
MGH104NEGP4-H02	0.639327	0.239274	0.201066	0.420369	0.687962	-1.34401	-1.20652
MGH104NEGP7-B12	0.634154	0.266114	0.292837	0.275569	0.778844	-0.705386	-1.63812
MGH104NEGP4-B08	0.592438	0.318673	0.30312	0.226666	0.685019	-0.989304	-1.40692
MGH104NEGP4-E11	0.432218	0.457479	0.506058	0.257435	0.546544	1.28651	-1.97181
MGH104NEGP2-D12	0.560403	0.374983	0.341195	0.359403	0.688488	-0.123879	-1.17492
MGH104NEGP7-D12	0.572535	0.214804	0.167015	0.293216	0.591149	-1.6194	-1.44868
MGH104NEGP7-B04	0.501654	0.291659	0.329536	0.238129	0.59017	-0.790948	-1.38308
MGH104NEGP4-C12	0.605277	0.309384	0.300491	0.263248	0.715445	-0.602493	-0.852472
MGH104NEGP4-B11	0.638084	0.263609	0.295844	0.175613	0.846362	-1.63851	-2.01977
MGH104NEGP2-F07	0.523361	0.159831	0.240463	0.263264	0.630092	0.120435	-1.1247
MGH104NEGP7-G04	0.480278	0.356025	0.255706	0.392865	0.606275	0.65622	-1.45685
MGH104NEGP2-E07	0.427506	0.37927	0.481584	0.285184	0.497192	1.56281	-1.78734
MGH104-P5-C09	0.574541	0.389794	0.354172	0.196815	0.478897	-0.390593	-1.1618
MGH104-P6-B01	0.615897	0.480195	0.38344	0.191204	0.739548	-0.675726	-1.50284
MGH104-P5-A04	0.556605	0.327185	0.388841	0.286911	0.699501	0.598027	-1.69414
MGH104NEGP7-C11	0.601108	0.317494	0.297161	0.240087	0.728784	-0.721556	-1.22975
MGH104-P6-B08	0.626514	0.318397	0.283461	0.320022	0.533586	-1.20487	-0.983512
MGH104NEGP4-F08	0.460747	0.346337	0.38526	0.304509	0.673146	0.0451372	-1.5218
MGH104-P6-D08	0.568046	0.415067	0.305569	0.224761	0.710898	0.844102	-1.64755
MGH104NEGP4-C08	0.558545	0.31609	0.320476	0.232317	0.674428	-0.793842	-1.41402
MGH104NEGP2-F03	0.561972	0.438914	0.358183	0.305073	0.700006	-0.366273	-1.75224
MGH104-P6-E10	0.567393	0.373067	0.273893	0.285498	0.718725	0.510166	-1.31504
MGH104NEGP2-B01	0.534124	0.296296	0.18578	0.343092	0.649202	-0.82354	-1.25056
MGH104-P6-F05	0.357264	0.294875	0.405852	0.206226	0.446645	0.453726	-1.73489
MGH104NEGP4-A10	0.572943	0.325815	0.216989	0.212027	0.712029	-1.10085	-1.37327
MGH104NEGP2-G06	0.536113	0.292285	0.329333	0.324988	0.668258	-0.735546	-1.28241
MGH104NEGP2-F04	0.645843	0.26932	0.132588	0.311279	0.76672	-1.28236	-1.48822
MGH104NEGP7-D07	0.470323	0.370174	0.264147	0.252239	0.714257	-0.345983	-1.50898
MGH104-P6-H01	0.284407	0.200077	0.30509	0.218822	0.410635	-0.710792	-1.07103
MGH104NEGP4-F12	0.581062	0.259967	0.204865	0.208179	0.577203	-0.840073	-1.76091
MGH104NEGP7-H06	0.548673	0.383599	0.2572	0.387331	0.72574	-0.816396	-1.32746
MGH104-P6-C04	0.645266	0.263661	0.181331	0.318639	0.670267	-0.990734	-0.810189
MGH104-P5-E02	0.566134	0.302198	0.23473	0.22798	0.646828	-0.96761	-1.67593
MGH104-P6-F10	0.437418	0.344259	0.289585	0.389933	0.527749	0.303887	-1.34609
MGH104-P6-E05	0.435818	0.381425	0.357775	0.341499	0.633284	0.845363	-1.62791
MGH104NEGP7-B08	0.573982	0.359409	0.374573	0.343966	0.792952	0.407195	-1.40332
MGH104NEGP4-F02	0.586797	0.431661	0.256288	0.216698	0.725547	-0.554713	-1.62455
MGH104NEGP2-B11	0.612986	0.263214	0.29069	0.364729	0.744025	-0.571835	-1.12299
MGH104-P5-H01	0.553887	0.288051	0.325844	0.261538	0.639451	-1.37891	-1.36342
MGH104-P6-E07	0.620369	0.353539	0.161218	0.286048	0.712727	-0.886819	-1.02033
MGH104-P5-F04	0.492403	0.311911	0.244178	0.289113	0.68978	-1.10862	-1.61104
MGH104NEGP4-D02	0.689356	0.389271	0.265304	0.299237	0.716781	-1.01918	-1.14394
MGH104NEGP7-D04	0.68134	0.35378	0.197239	0.209607	0.741653	-1.33771	-1.28105
MGH104-P5-F10	0.652001	0.138661	0.273834	0.234202	0.65809	-1.32186	-1.34789
MGH104-P6-D09	0.588999	0.206975	0.328816	0.354606	0.649263	-1.1106	-1.0635
MGH104-P6-F03	0.49092	0.190864	0.302684	0.38708	0.677734	-1.154	-1.56011
MGH104NEGP2-A03	0.490125	0.440609	0.262015	0.200245	0.692133	-0.717405	-1.69405
MGH104NEGP2-A01	0.602012	0.39253	0.213309	0.317901	0.729553	-1.03538	-1.64474
MGH104-P5-A07	0.651113	0.266513	0.217082	0.332966	0.682978	-0.85263	-1.40324
MGH104-P5-F01	0.519177	0.401632	0.263927	0.391015	0.733281	0.292147	-1.43952
MGH104-P6-C08	0.612876	0.480892	0.385841	0.105144	0.820027	-0.21879	-1.44405
MGH104NEGP2-B05	0.597277	0.334387	0.366634	0.314472	0.663173	-0.822227	-1.42566
MGH104NEGP4-C03	0.645208	0.388799	0.145138	0.333329	0.786771	-0.865718	-1.543
MGH104-P5-A05	0.540981	0.342372	0.336768	0.217782	0.475588	-0.410517	-1.2867
MGH104-P6-E02	0.654786	0.3585	0.269638	0.270704	0.764071	-1.36033	-1.70704
MGH104NEGP4-A11	0.440492	0.42084	0.362995	0.1932	0.666931	0.50326	-1.80377
MGH104-P6-F02	0.506725	0.317754	0.148916	0.31106	0.671914	-1.6345	-1.59198
MGH104-P5-D02	0.38264	0.395395	0.372003	0.349713	0.615085	0.575892	-1.64386
MGH104NEGP7-F06	0.503688	0.296616	0.328289	0.269728	0.578299	-0.744699	-1.6051
MGH104NEGP2-F05	0.561145	0.330119	0.260795	0.238156	0.732554	-0.658732	-1.52725
MGH104NEGP7-H08	0.419969	0.35924	0.272991	0.262758	0.543604	0.212501	-1.31605
MGH104NEGP7-C10	0.562639	0.489907	0.29364	0.425116	0.765851	-0.489119	-1.76986
MGH104NEGP4-B01	0.491134	0.458888	0.292011	0.263254	0.634987	0.838129	-1.72732
MGH104-P6-H09	0.48703	0.286927	0.186452	0.363328	0.582754	-0.7706	-1.12216
MGH104NEGP7-B10	0.427749	0.494005	0.460645	0.371608	0.76364	1.01633	-1.78939
MGH104NEGP2-D02	0.514234	0.430799	0.396426	0.265024	0.852829	-0.25017	-1.62601
MGH104NEGP2-B06	0.799666	0.371004	0.306989	0.342272	0.741293	-1.16782	-1.35709
MGH104NEGP4-G10	0.49998	0.408047	0.23827	0.298967	0.664361	0.482044	-1.43401
MGH104-P5-C01	0.453422	0.316598	0.262576	0.304979	0.663739	0.535521	-1.05089
MGH104NEGP4-B06	0.63414	0.388853	0.224849	0.376666	0.689687	-0.235936	-1.26142
MGH104-P6-E04	0.56199	0.370319	0.353594	0.256241	0.729194	-0.595363	-1.59444
MGH104-P6-E11	0.508257	0.398133	0.364757	0.265862	0.777724	0.127315	-1.30716
MGH104-P5-E12	0.50668	0.464182	0.346751	0.316825	0.69488	0.239613	-1.68664
MGH104NEGP2-E03	0.66283	0.35346	0.214853	0.337056	0.822176	-1.41786	-1.47243
MGH104-P6-G11	0.407483	0.286112	0.367858	0.340958	0.692574	-0.494003	-1.18412
MGH104-P6-A05	0.380248	0.29634	0.296879	0.449833	0.46153	0.287626	-1.22881
MGH104NEGP4-D03	0.579439	0.336884	0.165888	0.171467	0.729082	-0.932388	-1.37875
MGH104-P6-G10	0.574955	0.216976	0.232061	0.294762	0.633817	-1.48257	-1.20219
MGH104-P6-A10	0.590737	0.234941	0.320268	0.258764	0.64636	-1.51326	-1.48876
MGH104NEGP2-E06	0.540629	0.360686	0.271964	0.415501	0.658749	-0.389587	-1.63679
MGH104-P5-B06	0.427869	0.330628	0.443223	0.336298	0.562424	0.191673	-1.29314
MGH104-P5-B09	0.606619	0.307739	0.144489	0.353711	0.809344	-0.80733	-1.18337
MGH104NEGP4-E01	0.534727	0.437043	0.375908	0.192704	0.719351	-0.537809	-1.80129
MGH104NEGP2-G11	0.739131	0.294669	0.184377	0.268393	0.706586	-1.3085	-1.12203
MGH104-P5-F02	0.673672	0.329807	0.187336	0.34954	0.691667	-1.43776	-1.30001
MGH104NEGP4-B05	0.657136	0.350802	0.22529	0.423962	0.722456	-0.797947	-1.36383
MGH104NEGP4-C09	0.564179	0.315831	0.176396	0.24383	0.672491	-1.28887	-1.49316
MGH104NEGP7-B09	0.648238	0.231445	0.231776	0.351365	0.776837	-1.18662	-1.26938
MGH104NEGP7-D10	0.494623	0.370402	0.487224	0.199444	0.590128	0.660658	-1.87195
MGH104-P5-F06	0.668528	0.263506	0.126109	0.377916	0.776124	-1.5833	-1.21976
MGH104NEGP7-A06	0.56654	0.267769	0.295104	0.213419	0.641424	-1.51146	-1.26472
MGH104-P6-E09	0.642404	0.165759	0.356528	0.241482	0.561407	-1.34699	-1.3431
MGH104-P6-B07	0.646815	0.390684	0.296154	0.167244	0.820978	-0.398203	-1.53494
MGH104NEGP4-C05	0.493238	0.510078	0.306256	0.201734	0.715307	0.372404	-1.68884
MGH104NEGP4-G01	0.458863	0.54111	0.508438	0.234297	0.632815	1.07482	-1.77296
MGH104NEGP4-E12	0.578932	0.27415	0.341948	0.314489	0.740153	-1.4501	-1.42509
MGH104NEGP7-H01	0.557389	0.336996	0.33037	0.134455	0.695079	-0.872166	-1.66221
MGH104NEGP2-C09	0.525883	0.505782	0.424901	0.125393	0.73289	-0.0616836	-1.71149
MGH104-P5-B01	0.500333	0.295647	0.241258	0.21263	0.580853	-0.89213	-1.67879
MGH104-P5-D08	0.529303	0.388152	0.267147	0.190283	0.4815	-0.292593	-1.56179
MGH104-P6-B09	0.535538	0.347681	0.389988	0.156473	0.615987	0.508507	-1.73598
MGH104NEGP7-D05	0.549082	0.245699	0.365884	0.267347	0.651021	-0.644053	-0.897034
MGH104NEGP4-F11	0.457878	0.301647	0.284049	0.396938	0.538094	0.280558	-1.25145
MGH104-P6-C01	0.591116	0.255308	0.351503	0.377591	0.618267	-0.479628	-1.29449
MGH104NEGP4-C04	0.589916	0.317914	0.316536	0.305468	0.700936	-1.36916	-1.43311
MGH104NEGP7-D08	0.595461	0.343593	0.336629	0.392817	0.712523	-0.18073	-1.0427
MGH104-P6-D06	0.582725	0.334291	0.362669	0.324102	0.670247	-0.644398	-1.08282
MGH104NEGP2-G05	0.718028	0.415483	0.342461	0.330918	0.730909	-0.636253	-1.47118
MGH104-P6-C11	0.615344	0.412949	0.327934	0.142051	0.7513	-0.63791	-1.59832
MGH104-P6-D01	0.601839	0.435533	0.325767	0.370318	0.707122	0.00033651	-1.05761
MGH104NEGP4-D12	0.550114	0.356933	0.349982	0.398541	0.638872	-0.737597	-1.44525
MGH104NEGP4-A02	0.559396	0.408073	0.313282	0.332895	0.71953	-0.708746	-1.34638
MGH104NEGP4-D10	0.51189	0.297813	0.258276	0.376477	0.461976	-0.84681	-1.49744
MGH104NEGP2-A05	0.557774	0.450321	0.414218	0.178224	0.786327	0.0493031	-1.53808
MGH104-P5-H03	0.418548	0.429928	0.251904	0.19889	0.771552	0.287258	-1.49876
MGH104-P6-D10	0.498464	0.346112	0.187012	0.304209	0.745298	-0.752967	-1.15297
MGH104NEGP4-A05	0.61405	0.244468	0.267707	0.294598	0.534193	-1.20368	-1.39464
MGH104NEGP7-G11	0.52506	0.389455	0.335761	0.239192	0.740633	-0.583165	-1.8404
MGH104NEGP2-F09	0.642813	0.296715	0.0860386	0.430208	0.809648	-0.976462	-1.20695
MGH104-P6-B11	0.703886	0.349257	0.246204	0.256118	0.801427	-0.952091	-1.21934
MGH104NEGP2-F06	0.540955	0.227374	0.354533	0.258733	0.602684	-1.10446	-1.42049
MGH104NEGP7-F03	0.558292	0.276908	0.356605	0.337685	0.711728	-1.62353	-1.53525
MGH104-P6-G09	0.300271	0.274468	0.318193	0.276482	0.418703	-1.1569	-1.26151
MGH104-P6-C06	0.516667	0.291663	0.23137	0.396318	0.850371	-1.23128	-1.67991
MGH104NEGP4-G05	0.602476	0.318952	0.181433	0.286372	0.702861	-1.07067	-1.40187
MGH104-P5-B03	0.517708	0.364061	0.389247	0.195825	0.658281	-0.800606	-1.70998
MGH104NEGP2-H06	0.644859	0.269027	0.267795	0.0946451	0.736646	-1.53178	-1.44529
MGH104NEGP4-E08	0.549592	0.290416	0.265085	0.317237	0.676928	-1.30416	-1.2826
MGH104NEGP4-D07	0.203015	0.213496	0.402825	0.313649	0.480094	-0.501168	-1.68181
MGH104NEGP4-C02	0.559475	0.408268	0.224396	0.254917	0.724491	-0.498045	-1.63658
MGH104NEGP7-H10	0.456004	0.384114	0.359648	0.131165	0.590507	0.729454	-1.93005
MGH104NEGP2-F10	0.625646	0.312682	0.327691	0.205616	0.725354	-0.945395	-1.48157
MGH104NEGP7-B06	0.62328	0.311712	0.237129	0.229628	0.751252	0.290098	-1.13976
MGH104-P6-H06	0.295448	0.228656	0.250737	0.315152	0.638636	-0.138821	-1.41318
MGH104-P5-H10	0.493267	0.18846	0.306172	0.39858	0.586458	-1.2596	-1.46746
MGH104NEGP7-H11	0.232629	0.276827	0.438247	0.275489	0.327142	0.958341	-1.60933
MGH104NEGP4-F10	0.597942	0.334393	0.297624	0.288432	0.67973	-0.7946	-1.49947
MGH104-P6-G12	0.341242	0.213797	0.328172	0.317169	0.443447	-1.17268	-1.67129
MGH104NEGP7-F12	0.506891	0.348536	0.428634	0.222343	0.616501	-1.05667	-2.00245
MGH104NEGP4-B10	0.618452	0.37581	0.284343	0.162747	0.759182	-0.805526	-1.35285
MGH104NEGP4-G02	0.608815	0.280625	0.324306	0.386679	0.674375	-1.1272	-1.12257
MGH104-P6-B02	0.573444	0.445487	0.335754	0.359936	0.717482	0.825	-1.64699
MGH104-P6-E03	0.515129	0.306678	0.317073	0.230005	0.618475	-1.03211	-1.48954
MGH104NEGP2-F11	0.681089	0.308752	0.254063	0.0811943	0.813151	-1.71079	-1.91826
MGH104NEGP4-G07	0.616377	0.314943	0.270743	0.274902	0.744581	-1.41755	-1.79539
MGH104-P6-B12	0.501904	0.283332	0.281445	0.284247	0.53298	1.26811	-1.84547
MGH104NEGP4-H10	0.395764	0.315041	0.262586	0.31995	0.512784	-0.8243	-1.81494
MGH104NEGP4-E05	0.474112	0.271737	0.229254	0.147234	0.674111	-0.78972	-0.968236
MGH104-P6-F04	0.516247	0.18273	0.218103	0.500479	0.487913	-1.12383	-0.926008
MGH104NEGP4-A07	0.644823	0.407349	0.285864	0.374374	0.786423	-1.13698	-1.90269
MGH104NEGP4-H08	0.492078	0.302087	0.265747	0.384697	0.690967	-0.782091	-1.32763
MGH104NEGP2-D10	0.406914	0.207925	0.389264	0.421589	0.557315	-0.62944	-1.59602
MGH104-P6-E08	0.542409	0.174247	0.287425	0.315923	0.517802	-1.28234	-1.50047
MGH104-P5-E09	0.52857	0.260296	0.189664	0.271241	0.625554	-0.988756	-1.01797
MGH104NEGP2-H04	0.545386	0.24838	0.385872	0.272373	0.746988	-1.05558	-1.82967
MGH104-P5-B11	0.603709	0.297657	0.458772	0.294832	0.656389	-0.020079	-0.815464
MGH104NEGP2-B10	0.526888	0.231646	0.287865	0.264802	0.532497	0.252544	-1.24672
MGH104NEGP4-E09	0.558159	0.370032	0.28119	0.276699	0.621952	-0.405556	-1.54413
MGH104NEGP7-E12	0.605686	0.233166	0.137553	0.315859	0.689334	-1.82682	-1.16385
MGH104NEGP7-F11	0.570125	0.224948	0.275188	0.358187	0.661356	-1.28842	-1.27959
MGH104NEGP4-H06	0.453987	0.294048	0.383541	0.16104	0.415563	1.32537	-1.73398
MGH104NEGP2-A09	0.301698	0.35843	0.415548	0.2621	0.358976	2.25521	-1.98364
MGH104-P5-D03	0.50167	0.252915	0.358921	0.0689748	0.54576	1.46638	-1.67601
MGH104NEGP7-D06	0.353531	0.280485	0.3405	0.355038	0.345195	-0.947149	-1.421
MGH104NEGP2-B02	0.418915	0.253124	0.385275	0.366694	0.493457	-0.688397	-1.2835
MGH104NEGP2-H01	0.455035	0.303763	0.30732	0.390903	0.578363	-0.756083	-1.48377
MGH104-P5-H12	0.390056	0.328919	0.384896	0.222241	0.683096	0.348171	-1.72854
MGH104NEGP2-A04	0.483787	0.397908	0.261035	0.234809	0.617321	-0.432624	-1.6432
MGH104-P6-G02	0.282438	0.267481	0.342065	0.250462	0.65626	-0.59321	-1.76527
MGH104NEGP2-A02	0.394334	0.199497	0.336451	0.27772	0.560682	-1.15792	-1.54046
MGH104NEGP4-F09	0.51951	0.363915	0.429888	0.21565	0.647024	0.536159	-1.47017
MGH104NEGP7-A10	0.27999	0.16449	0.409593	0.408321	0.424179	1.20681	-1.34215
MGH104NEGP7-A12	0.27982	0.166329	0.39219	0.249702	0.265542	-0.157286	-1.18652
MGH104NEGP7-E04	0.420047	0.35061	0.283751	0.321244	0.439066	0.660023	-2.07309
MGH104NEGP2-D03	0.687372	0.19013	0.286127	0.363456	0.718826	-1.27501	-0.656295
MGH104NEGP2-C01	0.374551	0.443619	0.308789	0.258058	0.488017	1.77371	-2.15386
MGH104-P6-B05	0.394792	0.315129	0.412181	0.407004	0.631544	1.21282	-1.98702
MGH104-P6-F09	0.294909	0.279234	0.375085	0.22614	0.519589	1.21195	-2.11538
MGH104-P6-C07	0.582367	0.299802	0.263642	0.28118	0.620723	0.673439	-1.70648
MGH104-P6-A06	0.459441	0.135186	0.352444	0.300268	0.651289	-0.634821	-0.956435
MGH104NEGP7-B05	0.598377	0.26892	0.296289	0.269571	0.61672	-0.878475	-1.46846
MGH104NEGP4-F07	0.588816	0.223553	0.309839	0.203553	0.556761	-1.69197	-2.0115
MGH104-P5-G01	0.467388	0.368063	0.392014	0.295282	0.549639	-0.215638	-1.56
MGH104-P6-H10	0.35513	0.208172	0.383975	0.340002	0.509057	-0.585479	-1.66973
MGH104-P6-G08	0.246222	0.362093	0.298905	0.273085	0.711162	0.738234	-1.64625
MGH104-P5-G12	0.389095	0.325916	0.380739	0.138733	0.466577	-0.400695	-1.39512
MGH104-P6-F01	0.402064	0.29657	0.257354	0.361335	0.642425	-0.640345	-1.29984
MGH104NEGP7-G05	0.260615	0.157039	0.384039	0.297835	0.462846	-0.592001	-0.834104
MGH104NEGP7-A11	0.289388	0.2531	0.540019	0.389602	0.338066	1.74759	-1.84539
MGH104NEGP4-H04	0.124473	0.296029	0.299942	0.263157	0.575932	0.373312	-1.88649
MGH104NEGP4-G04	0.460009	0.338293	0.412603	0.169963	0.552431	-0.124953	-1.58692
MGH104-P6-F12	0.433161	0.212947	0.319213	0.326209	0.576896	-0.956739	-1.22715
MGH104NEGP2-H03	0.26819	0.198566	0.353493	0.364093	0.358692	0.588171	-1.33983
MGH104-P6-H07	0.241483	0.157137	0.347967	0.323756	0.38059	-0.903501	-1.47583
MGH104NEGP2-C04	0.516278	0.263891	0.213799	0.475848	0.525135	-0.372343	-1.22149
MGH104NEGP2-D08	0.402266	0.164007	0.420078	0.377894	0.458838	-0.599271	-0.691653
MGH104-P6-D07	0.414867	0.435799	0.447299	0.310119	0.451133	0.0262001	-1.52044
MGH104-P6-B10	0.371511	0.370065	0.431398	0.367988	0.575254	1.47934	-2.30414
MGH104NEGP2-E10	0.453822	0.244377	0.534392	0.130931	0.492367	0.299058	-1.58127
MGH104-P5-A11	0.189433	0.126702	0.296072	0.325788	0.525149	-1.44364	-1.70776
MGH104NEGP4-F06	0.210969	0.440845	0.330747	0.321745	0.37029	2.23635	-1.88425
MGH104-P5-E11	0.368489	0.351506	0.238672	0.296294	0.704721	-0.723565	-1.12684
MGH104-P5-D06	0.273685	0.293031	0.347343	0.237027	0.655401	-0.22695	-1.57417
MGH104NEGP7-F02	0.383483	0.40826	0.529821	0.28695	0.63644	1.0551	-2.24129
MGH104NEGP7-C07	0.526683	0.268652	0.218138	0.327719	0.595293	-1.50711	-1.37834
MGH104NEGP4-A08	0.543583	0.333736	0.427057	0.153591	0.523135	1.36643	-1.31261
MGH104NEGP7-A02	0.218357	0.214837	0.366836	0.29116	0.337562	1.77846	-1.88265
MGH104NEGP4-A04	0.37123	0.191037	0.374792	0.322377	0.272149	2.08187	-1.89198
MGH104-P5-A02	0.258407	0.165134	0.429498	0.245053	0.492385	0.731865	-1.88422
MGH105D-P3-C11	0.63707	0.25849	0.347989	0.605389	0.247529	-1.68571	1.47444
MGH105D-P1-F11	0.475957	0.129172	0.349724	0.521026	0.419951	-1.4106	0.921727
MGH105A-P1-F02	0.373989	0.10414	0.377343	0.435669	0.621786	0.837522	0.158577
MGH105C-P1-C04	0.163846	0.546604	0.614539	0.311916	0.299069	2.43839	-2.51848
MGH105C-P3-B11	0.200694	0.673592	0.809695	0.186774	0.258944	2.40461	-2.4326
MGH105A-P4-H08	0.160892	0.347372	0.519579	0.15824	0.145076	2.18067	-2.28084
MGH105B-P2-D11	0.245453	0.46628	0.673052	0.276191	0.314032	2.58419	-2.40703
MGH105B-P2-G11	0.120687	0.315878	0.649554	0.289911	0.22843	2.36753	-2.5148
MGH105B-P2-F03	0.232077	0.477256	0.590906	0.305462	0.398035	2.17873	-2.18171
MGH105A-P1-D10	0.145136	0.339031	0.391661	0.336911	0.475257	2.32101	-2.2044
MGH105B-P3-G03	0.221003	0.440934	0.534795	0.232642	0.173115	2.01617	-2.09059
MGH105B-P3-F02	0.209951	0.326835	0.512821	0.399358	0.294029	2.645	-2.43795
MGH105C-P3-E06	0.539158	0.188458	0.302807	0.428418	0.400469	0.460559	0.609169
MGH105A-P4-C04	0.45928	0.255146	0.365042	0.281538	0.35261	-0.636971	-0.331276
MGH105A-P1-B11	0.241448	0.36637	0.595208	0.35587	0.425968	2.08873	-2.4529
MGH105A-P4-B01	0.158895	0.434493	0.780014	0.398712	0.224977	2.22083	-2.28246
MGH105B-P2-B10	0.310761	0.400756	0.555119	0.297262	0.306823	2.11726	-2.22715
MGH105C-P3-F03	0.427581	0.383266	0.356802	0.246861	0.595001	1.61263	-1.76662
MGH105C-P1-H02	0.181591	0.278851	0.441698	0.300973	0.422135	1.95853	-1.83027
MGH105B-P3-G02	0.283045	0.396736	0.489774	0.316657	0.279538	2.21522	-2.08983
MGH105B-P3-A04	0.270842	0.428084	0.62844	0.29365	0.327842	2.39584	-2.25375
MGH105B-P3-C07	0.298697	0.675437	0.764957	0.246618	0.483854	2.33838	-2.36135
MGH105B-P3-B06	0.244904	0.297312	0.489062	0.268985	0.249451	2.10414	-2.08545
MGH105A-P1-A05	0.430211	0.228879	0.491783	0.181623	0.424952	-1.21069	-1.70866
MGH105A-P4-E06	0.319006	0.356653	0.557653	0.314978	0.377616	2.12812	-2.34784
MGH105A-P4-B06	0.295561	0.389251	0.534957	0.287362	0.183016	1.99168	-1.70793
MGH105C-P1-F09	0.258925	0.358028	0.488103	0.217606	0.584777	1.49159	-2.25682
MGH105C-P3-B02	0.35766	0.405435	0.438785	0.231984	0.351168	1.31003	-2.15809
MGH105A-P1-D12	0.318305	0.326833	0.595085	0.188435	0.431377	1.34662	-2.06957
MGH105C-P3-F01	0.278802	0.420471	0.415707	0.280125	0.447866	1.55775	-2.13312
MGH105A-P4-D03	0.433578	0.271307	0.332375	0.462493	0.412833	1.31047	-1.14581
MGH105A-P4-A12	0.471765	0.418038	0.371646	0.208035	0.49263	-0.637065	-0.988751
MGH105A-P4-C11	0.361596	0.509026	0.462664	0.137739	0.456175	1.97955	-2.27193
MGH105A-P4-G12	0.345875	0.38335	0.342575	0.265725	0.510974	0.763127	-1.74521
MGH105B-P2-D09	0.219807	0.4289	0.592205	0.296992	0.375755	2.71789	-2.56465
MGH105B-P2-D10	0.240669	0.396977	0.495545	0.255031	0.25184	1.87486	-2.33642
MGH105C-P3-G03	0.164983	0.342639	0.595453	0.344171	0.227737	2.14394	-2.4091
MGH105B-P3-A03	0.170444	0.360419	0.572771	0.361107	0.225785	2.0603	-1.7879
MGH105A-P4-B12	0.292958	0.431363	0.743903	0.0877177	0.436149	2.47379	-2.63324
MGH105A-P4-H09	0.0615429	0.327453	0.555724	0.182443	0.178399	2.22463	-2.07791
MGH105C-P1-H11	0.299096	0.160753	0.315731	0.381253	0.467241	-1.54525	-1.60204
MGH105A-P1-B06	0.272824	0.447044	0.434299	0.270724	0.481605	2.05661	-2.48352
MGH105B-P2-F02	0.189105	0.409462	0.681452	0.260698	0.259774	2.42966	-2.39193
MGH105A-P1-C07	0.342373	0.560256	0.583	0.234087	0.526228	2.19603	-2.60391
MGH105A-P4-H02	0.361653	0.275391	0.423279	0.297829	0.291673	1.19791	-1.63262
MGH105C-P3-G01	0.195047	0.500311	0.624741	0.191298	0.369453	2.20079	-2.34532
MGH105A-P1-F03	0.236687	0.440695	0.374439	0.204893	0.532291	2.30267	-2.18211
MGH105A-P1-D09	0.58499	0.386186	0.250357	0.210956	0.733917	-0.997097	-1.5347
MGH105A-P1-G11	0.570567	0.261317	0.267703	0.309702	0.643934	-0.107426	-0.525279
MGH105A-P1-D07	0.346108	0.187196	0.313731	0.308017	0.56469	-1.12034	-1.40078
MGH105A-P4-D04	0.4512	0.308193	0.497815	0.412695	0.555869	-0.351053	-0.999823
MGH105B-P3-E05	0.265945	0.4459	0.654423	0.256782	0.484452	2.35123	-2.3607
MGH105A-P1-D05	0.212683	0.552676	0.390296	0.175002	0.515523	2.19486	-2.65075
MGH105B-P3-A05	0.189532	0.377629	0.451207	0.292975	0.242231	1.96768	-2.03844
MGH105B-P3-E04	0.232746	0.240312	0.464339	0.272863	0.267581	2.19771	-2.00854
MGH105C-P3-D05	0.114748	0.265219	0.423587	0.264583	0.380681	1.91371	-1.85222
MGH105C-P1-G01	0.4222	0.304178	0.401094	0.362507	0.569558	1.57113	-1.93122
MGH105A-P4-C08	0.511063	0.261267	0.311732	0.268593	0.503408	-0.611186	-0.951246
MGH105C-P1-E08	0.122342	0.490695	0.521976	0.290855	0.43569	1.62095	-1.44279
MGH105C-P1-D08	0.422639	0.485814	0.537779	0.255706	0.352641	1.15334	-1.7817
MGH105B-P3-D06	0.307214	0.544666	0.659042	0.231696	0.249789	2.28343	-2.53786
MGH105A-P1-A01	0.434453	0.28217	0.354148	0.485476	0.49138	-0.418896	-0.870368
MGH105C-P3-D07	0.312279	0.189195	0.31365	0.331454	0.540803	-1.7876	-1.68879
MGH105B-P2-E11	0.219118	0.443956	0.539132	0.28686	0.394257	2.51146	-2.38811
MGH105C-P1-E10	0.141337	0.486112	0.755248	0.238069	0.415405	2.34295	-2.60079
MGH105C-P3-D01	0.313068	0.292861	0.30769	0.230947	0.204813	1.51334	-1.20155
MGH105A-P4-G03	0.48571	0.327127	0.480339	0.307634	0.776281	-1.29408	-1.83192
MGH105D-P1-D11	0.600681	0.171708	0.237455	0.354019	0.550766	-1.77282	-1.31176
MGH105A-P1-G07	0.639492	0.345969	0.306807	0.333418	0.624653	0.154344	-0.300413
MGH105C-P1-F07	0.565947	0.39131	0.496408	0.356394	0.697994	0.607766	-1.6359
MGH105C-P3-F06	0.558722	0.261747	0.306505	0.317163	0.522026	-1.83994	-1.44943
MGH105C-P3-F05	0.0885423	0.56571	0.734282	0.154808	0.530076	2.30375	-2.56122
MGH105A-P1-G09	0.351602	0.624945	0.478655	0.179193	0.689769	2.33048	-2.49149
MGH105D-P3-A05	0.574414	0.309682	0.24816	0.19321	0.669583	-1.69193	-1.3767
MGH105A-P4-C03	0.470129	0.230111	0.419108	0.442517	0.484047	-0.157004	-0.400639
MGH105A-P1-C03	0.444876	0.234949	0.352027	0.388753	0.596707	-0.883684	-1.49217
MGH105C-P1-C08	0.528414	0.270381	0.373438	0.309208	0.415708	-1.08247	-1.41052
MGH105D-P1-E09	0.517313	0.126062	0.333211	0.408446	0.346553	0.119077	0.934177
MGH105D-P3-C10	0.578465	0.179266	0.198264	0.482903	0.331397	1.41726	1.57229
MGH105B-P2-C05	0.334197	0.578736	0.534233	0.269764	0.471621	2.16715	-2.27276
MGH105C-B04	0.436025	0.761907	0.664861	0.32846	0.636739	1.81863	-2.4368
MGH105D-P3-D01	0.59613	0.121617	0.298444	0.588474	0.45566	-0.82493	1.0179
MGH105C-P1-F05	0.58828	0.153428	0.24548	0.446023	0.264534	-1.73893	-0.986535
MGH105A-P4-G01	0.217972	0.430766	0.544339	0.308616	0.525795	2.05229	-2.51434
MGH105A-P4-H12	0.290623	0.286147	0.365291	0.416551	0.40569	-0.372599	-1.081
MGH105C-P1-C03	0.552062	0.379922	0.226843	0.228946	0.615441	-0.721939	-1.51965
MGH105C-P1-D11	0.233161	0.488446	0.538386	0.226758	0.253518	2.31941	-2.25571
MGH105A-P4-F11	0.309009	0.390425	0.598541	0.221264	0.273816	2.67487	-2.66601
MGH105C-P1-A03	0.350833	0.393878	0.589067	0.309722	0.491956	2.18294	-2.43342
MGH105A-P1-F06	0.238242	0.50489	0.465994	0.319509	0.281971	2.65149	-2.54681
MGH105C-P1-F03	0.443331	0.146273	0.312006	0.397683	0.389402	0.795945	0.46633
MGH105A-P1-F01	0.655447	0.279414	0.234282	0.383083	0.690004	-1.68199	-1.51351
MGH105A-P4-F02	0.306778	0.585793	0.584249	0.17684	0.570268	2.2048	-2.54947
MGH105A-P4-G10	0.505442	0.360086	0.310449	0.18927	0.791592	-0.970452	-1.50804
MGH105A-P1-B09	0.314945	0.399885	0.541014	0.272485	0.42382	1.55559	-2.24462
MGH105C-P1-B10	0.252343	0.537502	0.794735	0.248386	0.508525	1.99782	-2.47395
MGH105C-P1-B08	0.593154	0.163108	0.29185	0.354521	0.320282	0.409981	0.373504
MGH105A-P1-B03	0.381117	0.438486	0.514921	0.165439	0.564613	1.40494	-2.39616
MGH105B-P3-F12	0.203084	0.294096	0.434587	0.321691	0.307797	2.25228	-2.09547
MGH105C-P1-C07	0.561554	0.317781	0.430884	0.244038	0.723228	-0.725494	-1.80643
MGH105A-P1-G06	0.519978	0.312535	0.378736	0.231239	0.60608	-0.833447	-1.68378
MGH105C-P1-F04	0.607542	0.170224	0.25092	0.354151	0.40541	-1.81775	-0.647355
MGH105C-P3-H05	0.500784	0.35253	0.389609	0.387977	0.63196	-0.704691	-1.50537
MGH105C-P1-D09	0.520596	0.355305	0.227956	0.13343	0.65042	-1.32179	-1.75402
MGH105D-P1-D12	0.662694	0.348099	0.305869	0.264818	0.787618	-1.74582	-1.7813
MGH105C-P1-H01	0.498824	0.349288	0.190011	0.247481	0.587833	-1.29237	-1.64689
MGH105D-P3-E10	0.403615	0.180195	0.321235	0.2617	0.562057	-1.62137	-1.61827
MGH105C-P1-A01	0.5484	0.365899	0.349513	0.153704	0.601075	-1.26619	-1.91651
MGH105C-P3-G05	0.573865	0.246555	0.258343	0.42183	0.4636	-1.9652	-1.40355
MGH105C-P1-D04	0.553511	0.214003	0.396942	0.229127	0.606683	-1.55463	-1.4096
MGH105C-P1-E03	0.18531	0.497951	0.702127	0.109844	0.379846	2.60452	-2.39153
MGH105C-P1-A10	0.50565	0.481538	0.181663	0.163643	0.653805	0.925397	-2.13751
MGH105A-P4-H11	0.548609	0.314929	0.339242	0.240021	0.741218	-0.4653	-1.37546
MGH105A-P1-A07	0.615792	0.348327	0.315614	0.0564763	0.698769	-0.834118	-1.53811
MGH105A-P4-A09	0.298972	0.606068	0.691963	0.164323	0.47898	2.17661	-2.49261
MGH105C-P3-G07	0.49676	0.383026	0.357655	0.186469	0.708636	0.420915	-2.05484
MGH105A-P1-E09	0.396622	0.16308	0.303995	0.197791	0.612988	0.0509716	-0.743546
MGH105D-P3-H12	0.502925	0.328564	0.301828	0.116676	0.647306	-1.07042	-1.35219
MGH105D-P1-E03	0.520506	0.176003	0.313668	0.377799	0.528697	-1.55758	-0.969306
MGH105D-P1-D07	0.615562	0.153863	0.306611	0.541893	0.427516	-0.0796181	1.57225
MGH105C-P1-A09	0.561684	0.184747	0.341903	0.679224	0.205297	-0.522217	2.11645
MGH105C-P3-G08	0.552873	0.175458	0.297115	0.735856	0.40827	-0.548622	1.36764
MGH105D-P3-B11	0.528415	0.336345	0.234013	0.169749	0.648206	-1.36524	-1.38548
MGH105A-P1-B02	0.505309	0.176422	0.249107	0.366251	0.511781	-1.57642	-0.711497
MGH105A-P4-E03	0.44641	0.200177	0.454168	0.246661	0.311792	1.19528	-1.59319
MGH105A-P1-F09	0.446722	0.158749	0.279103	0.4704	0.509197	0.359406	0.800206
MGH105C-P1-A08	0.340588	0.366206	0.515045	0.13042	0.524511	1.58579	-2.08162
MGH105D-P1-E10	0.335792	0.31945	0.412452	0.321728	0.454553	1.00664	-2.11688
MGH105C-P1-B09	0.488533	0.222696	0.309061	0.562239	0.500615	0.449891	0.130859
MGH105C-P1-G11	0.54069	0.141886	0.334317	0.315136	0.45096	-1.43483	-0.865235
MGH105D-P1-C06	0.556348	0.321808	0.291349	0.145709	0.610367	-1.64151	-1.46024
MGH105A-P1-A09	0.634723	0.176105	0.260414	0.241085	0.447741	-1.49989	-0.783512
MGH105D-P1-A08	0.588656	0.293656	0.238771	0.177764	0.604275	-1.65303	-0.932829
MGH105C-P1-G04	0.57747	0.244703	0.280704	0.289423	0.776787	-0.821303	-0.951664
MGH105D-P3-B02	0.559944	0.148902	0.395967	0.430835	0.472701	0.390145	0.902875
MGH105D-P1-C02	0.371547	0.1099	0.354918	0.32375	0.559879	-1.57375	-1.27154
MGH105C-P3-F04	0.544457	0.216213	0.356132	0.306872	0.631672	-1.63456	-1.71281
MGH105D-P1-E04	0.512556	0.138368	0.262075	0.361994	0.374284	0.520184	1.22989
MGH105C-P1-C10	0.686622	0.140739	0.15714	0.685758	0.30541	0.226883	1.62819
MGH105D-P3-D07	0.383084	0.240462	0.360102	0.211754	0.590464	-1.55111	-1.29565
MGH105D-P1-D04	0.711314	0.0826019	0.207925	0.382816	0.44887	-1.04996	-0.116908
MGH105D-P3-F12	0.623615	0.307696	0.289184	0.299893	0.733162	-1.71499	-1.92618
MGH105A-P1-B12	0.472843	0.301402	0.308993	0.290833	0.629882	-1.82949	-1.6958
MGH105C-P1-F02	0.503554	0.201759	0.283482	0.258614	0.638136	-1.75516	-1.59037
MGH105D-P1-E11	0.525045	0.187411	0.28797	0.298487	0.685157	-1.34856	-0.620839
MGH105D-P3-H08	0.565775	0.242178	0.277953	0.345124	0.618522	-1.99427	-1.52094
MGH105C-P3-B03	0.541831	0.305355	0.306069	0.251272	0.803427	-0.981999	-1.69858
MGH105C-P1-G06	0.488016	0.402254	0.399997	0.17108	0.640021	0.245025	-1.98725
MGH105A-P1-B07	0.50373	0.370639	0.294732	0.170444	0.874331	-1.24906	-1.79062
MGH105C-P3-A08	0.436842	0.189958	0.350425	0.368033	0.566354	-1.67067	-1.68327
MGH105A-P4-A04	0.520347	0.21058	0.296761	0.314675	0.52378	-1.6626	-1.50492
MGH105C-P3-A03	0.527472	0.414581	0.313506	0.100819	0.696157	-0.788184	-1.97694
MGH105D-P3-H02	0.520522	0.267295	0.348524	0.164897	0.589723	-0.769007	-1.88794
MGH105A-P4-E02	0.338633	0.403817	0.551821	0.264527	0.513272	2.42376	-2.39117
MGH105C-P3-C09	0.322844	0.247359	0.238454	0.293165	0.304997	1.3047	-1.11364
MGH105D-P1-G03	0.484204	0.0725949	0.363734	0.302501	0.149941	0.857793	1.43597
MGH105D-P3-G02	0.570778	0.206942	0.263132	0.301627	0.505213	-1.64474	-1.25419
MGH105C-P1-D10	0.226405	0.556202	0.692316	0.258045	0.397379	2.52736	-2.64871
MGH105D-P1-H01	0.527297	0.215418	0.278703	0.392389	0.570211	-1.81875	-1.43605
MGH105D-P1-A04	0.253558	0.219705	0.334234	0.303369	0.546943	-1.70326	-1.77027
MGH105D-P3-E02	0.584032	0.28706	0.362081	0.291072	0.663262	-0.845093	-1.59697
MGH105D-P1-C09	0.577582	0.13324	0.193313	0.389485	0.421702	0.761353	1.51492
MGH105D-P3-A08	0.630205	0.171995	0.279806	0.356835	0.422147	1.12358	1.49213
MGH105B-P2-G09	0.280255	0.451937	0.531217	0.27836	0.299056	2.15379	-2.30097
MGH105B-P2-H02	0.357636	0.548098	0.650267	0.276579	0.617264	2.03041	-2.37964
MGH105B-P2-D02	0.0158648	0.356389	0.479478	0.376541	0.255285	2.62136	-2.52501
MGH105D-P1-G02	0.425857	0.154137	0.421596	0.264334	0.467956	-1.67679	-1.65942
MGH105C-P3-F02	0.4073	0.225096	0.282108	0.323193	0.262597	0.0774605	-0.469781
MGH105A-P4-F07	0.60929	0.248927	0.299712	0.177801	0.605326	-1.65042	-1.14466
MGH105D-P3-C09	0.572756	0.226468	0.232896	0.377936	0.465503	-1.31045	-0.895887
MGH105A-P4-D09	0.473746	0.227665	0.326837	0.232542	0.374778	-1.64558	-1.11422
MGH105D-P3-G05	0.484597	0.169783	0.335247	0.336341	0.530213	-1.79259	-1.26215
MGH105D-P3-E09	0.466246	0.206453	0.36946	0.3951	0.581187	-0.984939	-1.30313
MGH105D-P1-G11	0.439357	0.124833	0.397779	0.299559	0.572857	-1.0237	-0.991791
MGH105D-P1-F03	0.63425	0.2689	0.217933	0.150343	0.722065	-1.92698	-1.52472
MGH105B-P2-B12	0.128328	0.482854	0.667753	0.204119	0.429414	2.38827	-2.51869
MGH105D-P1-B11	0.503015	0.268502	0.356639	0.226145	0.42244	-0.704265	-1.15637
MGH105D-P3-D05	0.510802	0.107581	0.390379	0.206923	0.538121	-1.19618	-0.269612
MGH105A-P1-C04	0.453623	0.296086	0.444527	0.19125	0.628557	-1.23447	-1.46216
MGH105A-P1-A10	0.628749	0.303478	0.304812	0.404497	0.607494	-0.9723	-1.02467
MGH105A-P4-G08	0.591452	0.27234	0.332886	0.0937352	0.579957	-1.72736	-1.78959
MGH105B-P2-G06	0.520079	0.263689	0.346667	0.297479	0.526419	-1.14718	-0.730394
MGH105C-P3-B06	0.448986	0.289622	0.346603	0.192376	0.585265	-1.11452	-1.90747
MGH105D-P1-F02	0.569857	0.251283	0.305072	0.483225	0.672924	-1.31262	-0.208523
MGH105C-P3-B04	0.393287	0.31125	0.381085	0.18997	0.552613	1.24639	-1.57729
MGH105A-P1-D03	0.51603	0.284363	0.336378	0.146931	0.482049	-1.38737	-1.41887
MGH105A-P4-G09	0.519723	0.241023	0.24481	0.174198	0.753365	-1.16214	-1.74221
MGH105A-P1-B08	0.495751	0.311483	0.351115	0.226975	0.570307	-0.834686	-1.42859
MGH105C-P3-C10	0.643408	0.320391	0.30534	0.155749	0.724754	-1.08652	-1.70247
MGH105C-P1-B12	0.524815	0.21583	0.300978	0.252016	0.700535	-0.909724	-0.68069
MGH105A-P4-D12	0.553183	0.22548	0.349316	0.554561	0.375278	0.794585	1.36431
MGH105D-P3-H11	0.565488	0.218298	0.248856	0.205633	0.683227	-1.57764	-1.69306
MGH105D-P3-F03	0.455489	0.241794	0.298763	0.262014	0.542149	-1.48825	-1.45563
MGH105D-P1-C08	0.676063	0.258687	0.193894	0.507561	0.748721	-0.735012	-0.223782
MGH105D-P1-D01	0.552263	0.193877	0.186308	0.462478	0.364599	0.557033	1.82972
MGH105D-P3-H03	0.504839	0.151154	0.345514	0.437206	0.51629	-1.54573	-0.781882
MGH105D-P3-F08	0.475426	0.215868	0.381556	0.172213	0.651604	-1.35048	-1.67913
MGH105A-P4-G11	0.582781	0.295323	0.291739	0.264306	0.582057	-1.24972	-1.55922
MGH105C-P1-H10	0.526295	0.295025	0.275996	0.338624	0.575587	-1.48349	-1.71918
MGH105B-P3-H04	0.236312	0.528508	0.695874	0.193046	0.303341	2.30605	-2.47022
MGH105B-P3-E07	0.124704	0.330518	0.812472	0.235754	0.36003	2.22445	-2.18267
MGH105A-P4-D01	0.199068	0.292087	0.530472	0.175072	0.329252	2.25574	-2.08304
MGH105D-P1-F04	0.464991	0.186328	0.362887	0.198677	0.580775	-1.40341	-1.42005
MGH105C-P1-D05	0.568734	0.213247	0.299359	0.3625	0.655012	-1.82918	-1.49932
MGH105B-P3-H05	0.33039	0.332657	0.323265	0.27764	0.408547	1.9483	-1.57138
MGH105B-P3-C03	0.160042	0.511164	0.762077	0.326928	0.199809	2.44541	-2.4118
MGH105B-P2-D07	0.225485	0.650192	0.800829	0.241254	0.390716	2.53648	-2.38091
MGH105B-P2-D06	0.107497	0.451799	0.563899	0.298348	0.483161	2.69481	-2.41481
MGH105B-P3-H02	0.240166	0.427547	0.530325	0.356203	0.158724	2.48889	-2.28047
MGH105B-P3-H09	0.0809614	0.436326	0.629394	0.262971	0.247525	2.17932	-2.43036
MGH105B-P3-H11	0.379826	0.256072	0.360124	0.272147	0.409248	2.07555	-1.85614
MGH105B-P3-A08	0.281123	0.386	0.469772	0.311203	0.278982	2.56844	-2.21163
MGH105A-P4-F03	0.223718	0.409397	0.556733	0.370715	0.410101	2.35594	-2.28997
MGH105B-P2-B11	0.341173	0.445776	0.670379	0.16007	0.485838	2.69226	-2.42099
MGH105A-P1-C06	0.336723	0.355321	0.518391	0.256345	0.228003	2.36432	-2.39866
MGH105B-P2-A07	0.23149	0.54596	0.501051	0.417836	0.403926	2.1835	-2.26101
MGH105A-P1-H01	0.272644	0.49518	0.454553	0.210949	0.212979	2.19741	-2.32127
MGH105B-P2-G04	0.24088	0.447364	0.346592	0.291579	0.320479	2.52263	-2.33622
MGH105A-P1-E08	0.453037	0.307883	0.422624	0.26427	0.64212	-0.984524	-1.524
MGH105D-P1-B04	0.561105	0.0785358	0.267444	0.418332	0.388707	1.24044	1.5578
MGH105A-P4-D11	0.377485	0.257634	0.348581	0.236077	0.643807	-0.729137	-1.48584
MGH105D-P1-D06	0.627692	0.219781	0.397999	0.270213	0.760607	-1.6094	-1.61938
MGH105D-P1-B06	0.505618	0.173686	0.200711	0.402617	0.373605	1.32341	1.43783
MGH105B-P3-B12	0.314425	0.461248	0.492069	0.275739	0.283575	2.22374	-2.28868
MGH105B-P3-D11	0.177523	0.287192	0.419623	0.276177	0.23434	2.08536	-2.19661
MGH105C-P3-A09	0.449913	0.343449	0.348706	0.101461	0.65991	-0.787138	-1.3534
MGH105B-P3-G10	0.182793	0.485439	0.805457	0.26123	0.137732	2.21542	-2.27223
MGH105B-P2-E04	0.163202	0.382522	0.633687	0.316512	0.273723	2.31961	-2.19941
MGH105D-P1-G10	0.691784	0.224764	0.211654	0.382303	0.706963	-1.73243	-1.24126
MGH105D-P1-H11	0.546488	0.334656	0.229204	0.395378	0.678586	-1.116	-1.66494
MGH105D-P1-G04	0.507347	0.268797	0.20244	0.267717	0.660968	-0.934457	-1.24449
MGH105D-P3-F11	0.383567	0.0888717	0.393971	0.192756	0.353253	-0.436574	0.45573
MGH105D-P3-B03	0.531062	0.119253	0.291528	0.652483	0.180098	0.99221	2.10384
MGH105C-P1-G09	0.66544	0.24405	0.256037	0.195566	0.733954	-1.7521	-1.4229
MGH105A-P1-F08	0.468433	0.252495	0.270142	0.176254	0.705896	-1.31931	-1.64563
MGH105D-P3-E12	0.505019	0.336747	0.254457	0.19509	0.720535	-1.18919	-1.50748
MGH105D-P1-A05	0.549695	0.173022	0.311224	0.282995	0.517124	-1.51069	-0.623404
MGH105D-P3-G04	0.424069	0.242043	0.315543	0.142185	0.633582	-0.899408	-1.17216
MGH105D-P1-G05	0.506911	0.111359	0.281668	0.361877	0.349286	0.913742	1.13504
MGH105D-P3-F06	0.520034	0.194136	0.278861	0.19938	0.55284	-1.82178	-1.82183
MGH105D-P3-E04	0.525335	0.182537	0.291366	0.375167	0.559896	-1.83934	-1.08439
MGH105D-P3-D04	0.552536	0.139187	0.252549	0.310073	0.490249	-1.353	-0.817629
MGH105C-P3-A02	0.696554	0.221084	0.23713	0.683698	0.363702	0.26412	1.78821
MGH105D-P3-C03	0.687678	0.0755624	0.296763	0.621537	0.270204	-0.411359	1.71122
MGH105A-P4-F05	0.444215	0.31152	0.357652	0.229421	0.716176	-1.12432	-1.3736
MGH105A-P1-G01	0.499549	0.28103	0.372369	0.334199	0.524932	-0.589555	-0.661283
MGH105A-P1-E10	0.618222	0.109139	0.335666	0.432522	0.19637	0.076036	1.78579
MGH105C-P3-H07	0.324043	0.237002	0.308749	0.289611	0.566246	0.594034	-1.59251
MGH105C-P1-E01	0.599918	0.222531	0.238928	0.237781	0.744217	-1.67764	-1.0201
MGH105A-P1-G08	0.225346	0.518385	0.391566	0.276211	0.370094	2.51206	-2.3924
MGH105D-P1-D10	0.583742	0.28984	0.245007	0.128296	0.799857	-1.56414	-1.42346
MGH105B-P3-D05	0.405719	0.440165	0.517186	0.193432	0.465314	1.78144	-1.98996
MGH105D-P3-G09	0.547712	0.172383	0.37114	0.268038	0.448556	-1.48389	-1.32558
MGH105C-P1-B11	0.399434	0.331405	0.413667	0.147215	0.5785	0.96551	-1.78332
MGH105B-P2-D05	0.268712	0.4523	0.646186	0.0804761	0.57498	2.1679	-2.51997
MGH105A-P4-F09	0.308746	0.47246	0.574654	0.176263	0.49405	1.82715	-1.94649
MGH105B-P2-H08	0.28088	0.48472	0.543262	0.164053	0.380551	2.12266	-2.36985
MGH105C-P1-D01	0.493984	0.409577	0.319007	0.244098	0.69097	-1.18187	-1.41601
MGH105C-P3-D06	0.510306	0.356174	0.430498	0.346534	0.806739	-0.858735	-1.52235
MGH105C-P1-B07	0.591813	0.296662	0.208337	0.231132	0.621926	-1.32716	-1.51157
MGH105A-P4-C05	0.496157	0.288109	0.258669	0.22155	0.795433	-1.39343	-1.88077
MGH105C-P3-E03	0.559455	0.266102	0.293529	0.384291	0.703994	-0.984305	-1.63659
MGH105D-P3-D10	0.596137	0.291984	0.2589	0.283804	0.783271	-1.39762	-1.77701
MGH105C-P3-F07	0.58734	0.38299	0.283242	0.405198	0.730399	-0.84077	-1.35417
MGH105A-P4-A01	0.547963	0.205604	0.366345	0.472229	0.376538	1.62702	1.45349
MGH105A-P1-C05	0.524553	0.219155	0.363929	0.177389	0.731827	-1.4605	-1.83517
MGH105C-P3-A06	0.48981	0.521479	0.443757	0.125018	0.640284	1.35963	-2.02112
MGH105D-P1-G12	0.5119	0.202467	0.261804	0.282188	0.60863	-1.35194	-1.72609
MGH105A-P1-A02	0.388188	0.337339	0.341281	0.258623	0.426582	1.66999	-1.95987
MGH105A-P4-E07	0.545989	0.221295	0.352781	0.204428	0.742088	-1.54027	-1.51879
MGH105C-P1-G08	0.464597	0.229751	0.324252	0.372542	0.684368	-1.39584	-1.18009
MGH105D-P3-F07	0.568042	0.197046	0.285555	0.326182	0.621922	-1.46427	-1.29525
MGH105D-P1-C11	0.550008	0.196446	0.274196	0.208944	0.533918	-1.75366	-1.67944
MGH105B-P2-H10	0.154438	0.774974	0.687534	0.260539	0.408099	2.3403	-2.61724
MGH105D-P1-A10	0.53346	0.166594	0.324881	0.48968	0.404323	-1.10124	-0.931283
MGH105C-P3-E07	0.579975	0.276954	0.279307	0.255847	0.82526	-1.49915	-1.27674
MGH105C-P1-C06	0.293218	0.446798	0.479563	0.184349	0.212522	1.99907	-2.13751
MGH105B-P2-H04	0.239137	0.453735	0.69667	0.211182	0.360994	2.41728	-2.53073
MGH105C-P3-G09	0.594174	0.0848243	0.244743	0.654719	0.441505	0.90093	1.55425
MGH105B-P3-B10	0.171645	0.380643	0.400717	0.314723	0.342184	2.64675	-2.40245
MGH105B-P3-E12	0.242641	0.762499	0.667258	0.20959	0.515586	2.6622	-2.67812
MGH105D-P1-F01	0.527504	0.169807	0.303051	0.599202	0.448243	0.501994	0.712767
MGH105B-P2-F04	0.193711	0.332869	0.627772	0.149385	0.278392	2.20174	-2.25021
MGH105B-P3-H08	0.250115	0.318945	0.386452	0.296489	0.168141	2.4516	-2.13227
MGH105A-P4-C02	0.287959	0.424531	0.430397	0.216672	0.444081	2.0038	-1.96249
MGH105A-P4-G06	0.485263	0.137017	0.328859	0.339183	0.218618	0.341731	1.54569
MGH105A-P4-E01	0.553329	0.0914527	0.398651	0.746937	0.205698	0.0156927	1.73347
MGH105D-P1-B02	0.579409	0.0809458	0.352487	0.548665	0.149839	0.73577	1.99314
MGH105C-P3-G06	0.602219	0.352526	0.295055	0.388301	0.67418	-0.0749251	-1.03606
MGH105D-P3-G08	0.541075	0.275104	0.2789	0.209686	0.569785	-1.84167	-1.52975
MGH105D-P3-A09	0.521232	0.315421	0.278001	0.245694	0.53271	-1.45398	-1.56905
MGH105D-P3-E08	0.450291	0.22742	0.318857	0.365094	0.595795	-1.98737	-1.7916
MGH105A-P1-E06	0.570709	0.431123	0.243978	0.195264	0.861962	-1.04275	-1.62282
MGH105D-P3-C05	0.32784	0.165577	0.274946	0.360224	0.347906	-1.49966	-1.05457
MGH105D-P3-E05	0.413646	0.172407	0.312416	0.298677	0.463355	-1.55895	-1.59548
MGH105D-P1-H03	0.334374	0.180657	0.344626	0.180017	0.689072	-1.6365	-1.79309
MGH105D-P1-C12	0.591053	0.281157	0.167559	0.172575	0.742691	-1.71592	-1.67032
MGH105D-P1-D03	0.379709	0.297719	0.391999	0.296543	0.442422	1.43114	-1.89739
MGH105C-P1-A12	0.456648	0.281465	0.283552	0.396944	0.482777	-1.09227	-0.854113
MGH105B-P3-G06	0.192543	0.411316	0.516322	0.262157	0.369048	2.28504	-2.30282
MGH105B-P3-F04	0.275586	0.569507	0.746131	0.196329	0.361913	2.28612	-2.66927
MGH105C-P1-H12	0.522074	0.394499	0.35185	0.415521	0.733266	0.914213	-1.42127
MGH105A-P1-A08	0.238526	0.531725	0.610354	0.198244	0.481726	2.3955	-2.67058
MGH105B-P3-F09	0.254566	0.367737	0.433465	0.308785	0.242922	2.02629	-2.06847
MGH105B-P3-F10	0.296126	0.378822	0.511497	0.342171	0.32147	2.13286	-1.77622
MGH105A-P1-E03	0.148271	0.470509	0.686399	0.175708	0.420145	2.2108	-2.61508
MGH105C-P1-A05	0.537797	0.265262	0.298847	0.251959	0.60127	-1.29751	-1.13135
MGH105C-P3-H02	0.348217	0.290305	0.53883	0.408121	0.223584	-0.791032	-0.880909
MGH105B-P3-H03	0.167535	0.458563	0.514727	0.164259	0.223414	2.30025	-2.48904
MGH105B-P3-G09	0.196812	0.523455	0.643391	0.368569	0.356183	2.35337	-2.50712
MGH105D-P1-G06	0.478532	0.104872	0.272498	0.399515	0.333119	-1.42871	-0.271523
MGH105C-P3-H08	0.481527	0.236328	0.255341	0.268231	0.511281	-1.60706	-1.28934
MGH105D-P1-A07	0.568419	0.165265	0.388507	0.249071	0.640797	-1.37217	-1.04973
MGH105A-P4-F08	0.468466	0.191013	0.342736	0.284055	0.541284	-0.758113	-1.36684
MGH105A-P4-C10	0.232937	0.474115	0.736516	0.316463	0.316049	2.24087	-2.26909
MGH105B-P2-E07	0.205609	0.683164	0.880356	0.20192	0.529423	2.14332	-2.35999
MGH105C-P3-D02	0.745391	0.373919	0.294096	0.143224	0.760266	-1.2255	-1.26322
MGH105C-P3-C07	0.591311	0.285539	0.307238	0.311758	0.535307	-1.12635	-1.29313
MGH105C-P3-A12	0.508185	0.315908	0.436114	0.192907	0.540709	1.38577	-1.87697
MGH105C-P1-C11	0.51975	0.335201	0.30402	0.256136	0.794743	-0.399089	-1.50231
MGH105C-P3-D03	0.598425	0.294227	0.416009	0.293362	0.712562	-1.17637	-1.26163
MGH105C-P1-B02	0.367578	0.332365	0.353045	0.15108	0.453012	1.80782	-2.1512
MGH105B-P3-C09	0.322191	0.594158	0.535938	0.228576	0.444742	2.28195	-2.54502
MGH105C-P1-B06	0.648867	0.364482	0.360312	0.203497	0.49054	-0.631412	-1.70234
MGH105C-P1-B04	0.446235	0.283008	0.273412	0.28973	0.317456	-1.2291	-0.590594
MGH105C-P3-C02	0.506102	0.296667	0.32182	0.281103	0.702023	-1.36901	-1.53868
MGH105C-P1-E09	0.320627	0.313382	0.32438	0.331779	0.445683	-0.159691	-1.23865
MGH105C-P3-F08	0.446819	0.413166	0.576676	0.284249	0.549399	1.37878	-1.90195
MGH105A-P1-G02	0.441225	0.268891	0.309142	0.289038	0.675055	-1.46541	-1.3528
MGH105C-P3-C05	0.566381	0.399102	0.354019	0.270521	0.711407	-0.550786	-1.1703
MGH105C-P1-F06	0.264725	0.473367	0.657554	0.179113	0.28661	1.9506	-2.0124
MGH105C-P3-H03	0.36589	0.447982	0.472851	0.0712371	0.490236	2.04164	-2.21742
MGH105C-P1-C01	0.335886	0.41831	0.444217	0.264915	0.313814	2.173	-2.04431
MGH105B-P2-F07	0.319397	0.589465	0.581656	0.32793	0.56789	1.84846	-2.36074
MGH105C-P1-B01	0.471036	0.290341	0.382982	0.317803	0.391995	0.986828	-1.32059
MGH105B-P3-D07	0.22206	0.548842	0.626327	0.319588	0.242793	2.37319	-2.40398
MGH105B-P2-E09	0.264165	0.620495	0.719214	0.14131	0.519968	2.35848	-2.69501
MGH105B-P2-H01	0.230496	0.402401	0.734163	0.255013	0.269539	2.24235	-2.53607
MGH105A-P4-B04	0.413495	0.412301	0.566463	0.207113	0.418795	1.90249	-2.07958
MGH105C-P1-G03	0.482404	0.260694	0.311027	0.215906	0.583489	0.464423	-1.16635
MGH105C-P1-A11	0.576982	0.304788	0.254316	0.198091	0.824918	-1.13682	-1.51075
MGH105D-P1-G09	0.572277	0.206558	0.218773	0.36801	0.6986	-2.19685	-2.07903
MGH105C-P1-F11	0.288076	0.348545	0.455966	0.184085	0.64746	-0.237667	-1.6165
MGH105C-P1-G07	0.380832	0.294011	0.40436	0.335557	0.269318	1.71803	-1.41907
MGH105C-P1-H03	0.366859	0.355914	0.387136	0.368272	0.615659	0.0241812	-1.05089
MGH105C-P3-E09	0.461011	0.206748	0.388756	0.422573	0.612197	-0.993933	-0.155638
MGH105C-P3-G04	0.60072	0.112283	0.349828	0.407597	0.392972	0.327286	0.762634
MGH105D-P1-F06	0.551191	0.198962	0.326834	0.337771	0.660678	-1.63151	-0.813224
MGH105A-P4-B05	0.485887	0.323881	0.331206	0.165738	0.595671	-1.59753	-1.85518
MGH105C-P3-C06	0.503913	0.224534	0.235944	0.287387	0.615692	-1.59093	-1.8199
MGH105C-P1-E05	0.303613	0.262564	0.397511	0.36141	0.500442	0.331543	-1.58747
MGH105D-P3-C01	0.503876	0.219952	0.293978	0.123786	0.692329	-1.11583	-1.87446
MGH105B-P3-A12	0.217792	0.352584	0.424199	0.403671	0.332854	2.24551	-1.90724
MGH105B-P2-B05	0.177285	0.322029	0.553423	0.273287	0.349965	2.25972	-2.17852
MGH105B-P2-G10	0.188875	0.317376	0.488124	0.207382	0.258804	1.77336	-2.26825
MGH105A-P1-C01	0.25588	0.22942	0.473499	0.2107	0.421286	-0.108834	-1.34862
MGH105B-P2-C06	0.145124	0.444131	0.736921	0.180202	0.386616	2.36132	-2.41011
MGH105B-P2-F06	0.195437	0.357477	0.508282	0.249558	0.370752	2.32281	-1.97786
MGH105D-P3-H09	0.407477	0.273786	0.339463	0.160642	0.666373	-1.05684	-1.32619
MGH105C-P3-G10	0.568907	0.299249	0.299884	0.229067	0.590223	-1.05702	-0.0649338
MGH105B-P2-H11	0.279434	0.479348	0.445188	0.260171	0.484446	2.0436	-2.36424
MGH105C-P3-G02	0.48505	0.3894	0.495161	0.369817	0.471618	0.768846	-1.3623
MGH105A-P4-D06	0.459587	0.322509	0.428306	0.144232	0.662927	-1.25003	-1.49032
MGH105A-P4-F01	0.181364	0.419299	0.451509	0.262376	0.24557	1.46923	-1.63959
MGH105B-P2-A12	0.281846	0.397091	0.605428	0.311076	0.28604	2.17001	-2.09654
MGH105A-P1-A06	0.285435	0.393742	0.41979	0.272074	0.461163	1.66034	-1.81899
MGH105C-P3-E02	0.425284	0.231613	0.336241	0.252908	0.463931	-1.29107	-1.07037
MGH105A-P1-F07	0.541284	0.192424	0.263604	0.292729	0.751374	-1.95315	-1.84475
MGH105A-P4-B09	0.583626	0.343299	0.451507	0.304896	0.687003	-1.554	-1.6326
MGH105A-P1-F10	0.574077	0.271625	0.381176	0.393406	0.684822	-1.4192	-0.664666
MGH105D-P3-D03	0.443975	0.18649	0.383154	0.342925	0.571663	-1.57993	-1.0481
MGH105A-P4-C06	0.586395	0.200224	0.241412	0.296192	0.644436	-1.97573	-1.52877
MGH105A-P4-F10	0.216118	0.361103	0.69577	0.452795	0.25124	2.02707	-1.84008
MGH105D-P3-G12	0.458521	0.159425	0.329635	0.378518	0.267661	-1.00745	-0.550635
MGH105D-P1-A01	0.490564	0.225065	0.310267	0.30837	0.520716	-1.69978	-1.50486
MGH105D-P3-F02	0.441063	0.110934	0.366211	0.325377	0.241015	-1.60635	-0.62494
MGH105A-P1-E04	0.606962	0.266721	0.216042	0.117387	0.765199	-1.68488	-1.54385
MGH105A-P4-D10	0.533668	0.274579	0.324572	0.337245	0.747293	-1.71026	-1.25029
MGH105C-P3-C11	0.112884	0.319995	0.485813	0.312169	0.28683	2.16948	-2.03443
MGH105A-P1-B05	0.0858715	0.388414	0.502252	0.341752	0.287643	2.21845	-1.91352
MGH105A-P4-G07	0.42072	0.382181	0.403622	0.427027	0.635701	1.95751	-2.24503
MGH105D-P3-F10	0.347277	0.236779	0.513938	0.180435	0.388478	0.579729	-1.56689
MGH105D-P3-A07	0.497503	0.192991	0.354073	0.671852	0.168533	-0.113679	1.72682
MGH105C-P3-D11	0.342873	0.173565	0.376072	0.395901	0.421144	0.954649	-0.953877
MGH105C-P3-E08	0.0796863	0.412363	0.618872	0.345045	0.260766	2.45955	-2.32043
MGH105B-P3-D03	0.201445	0.452914	0.590391	0.190782	0.292945	2.31855	-2.11032
MGH105D-P1-E08	0.336735	0.226538	0.315331	0.176638	0.37077	-1.5847	-1.85765
MGH105D-P3-A03	0.571819	0.27555	0.222462	0.226323	0.674228	-1.66076	-1.77788
MGH105D-P3-B06	0.422349	0.243061	0.29064	0.266495	0.354096	-1.29581	-0.616618
MGH105A-P4-H10	0.396537	0.172101	0.299566	0.325963	0.473716	-0.983461	-1.37404
MGH105D-P3-H04	0.462164	0.205231	0.3732	0.281491	0.297652	-1.35628	-1.05541
MGH105D-P3-B08	0.504646	0.161876	0.404126	0.376901	0.612966	-1.20858	-0.820372
MGH105D-P1-H04	0.435014	0.129907	0.348736	0.390324	0.548172	-0.971239	-0.779657
MGH105D-P3-H01	0.339953	0.15541	0.384609	0.332339	0.597945	-1.53835	-1.4429
MGH105A-P1-C09	0.190138	0.220557	0.402639	0.367332	0.153424	1.62317	-1.32953
MGH105A-P4-A10	0.237878	0.280073	0.573536	0.33304	0.216159	2.33544	-2.23838
MGH106-P7-E10	0.278827	0.433354	0.346329	0.26738	0.477468	2.48861	-2.28317
MGH106-P2-B01	0.411385	0.260844	0.432813	0.225779	0.723884	-0.552315	-1.75577
MGH106-P2-B12	0.492111	0.316184	0.279836	0.121202	0.653896	-0.836166	-1.11596
MGH106-P2-H07	0.452801	0.39539	0.311676	0.219037	0.611403	-0.337142	-1.80765
MGH106-P2-E09	0.545513	0.119123	0.331917	0.403005	0.305449	2.03806	1.86237
MGH106-P2-E04	0.480508	0.177177	0.358243	0.242639	0.200744	1.17046	1.07226
MGH106-P2-F08	0.421097	0.392965	0.281729	0.287879	0.66461	0.695028	-1.70391
MGH106-P2-D09	0.399944	0.440015	0.529234	0.10199	0.682807	0.750918	-2.09325
MGH106-P3-B03	0.498551	0.474709	0.423496	0.158661	0.56965	1.20641	-2.23156
MGH106-P2-G01	0.472435	0.330893	0.383209	0.158201	0.60144	-0.00300036	-1.59979
MGH106-P2-G11	0.33037	0.27933	0.373906	0.20496	0.675156	-0.556107	-1.75827
MGH106-P2-H01	0.423507	0.369102	0.343973	0.197152	0.717288	-0.541725	-1.41047
MGH106-P7-G12	0.373912	0.354587	0.378204	0.178281	0.531712	0.923337	-2.01059
MGH106-P3-E10	0.472302	0.431374	0.497941	0.212361	0.485778	1.31604	-1.90428
MGH106-P7-C03	0.22869	0.258779	0.592479	0.270277	0.320444	1.93396	-2.08666
MGH106-P7-B04	0.366508	0.349658	0.516908	0.27281	0.537512	1.09614	-1.85972
MGH106-P3-C02	0.383554	0.406068	0.491012	0.272618	0.579951	1.19835	-1.96244
MGH106-P2-C03	0.339274	0.414971	0.443622	0.276124	0.411983	1.97704	-2.14016
MGH106-P7-E02	0.323117	0.317442	0.493309	0.271913	0.564958	0.789648	-2.02008
MGH106-P3-C05	0.330039	0.556054	0.565711	0.124978	0.710295	1.27522	-2.28484
MGH106-P3-F02	0.415173	0.435384	0.464489	0.167091	0.711645	1.12328	-1.98253
MGH106-P7-F01	0.618488	0.410124	0.208415	0.116303	0.640171	-0.0936885	-0.970201
MGH106-P2-E05	0.348986	0.385997	0.385098	0.0942057	0.747577	-0.0323653	-1.56116
MGH106-P2-C12	0.661613	0.348172	0.288031	0.159846	0.683291	-0.508244	-1.41706
MGH106-P7-H09	0.458056	0.267776	0.332074	0.216851	0.656614	-0.941687	-1.75096
MGH106-P3-B09	0.439369	0.552072	0.550118	0.169342	0.73808	-0.0276616	-1.69569
MGH106-P3-E06	0.631275	0.275546	0.219592	0.188599	0.715558	-0.866857	-0.84148
MGH106-P7-G01	0.393536	0.346781	0.331563	0.161377	0.552545	-1.06208	-1.86447
MGH106-P2-G05	0.676675	0.331389	0.108678	0.35791	0.76429	-1.22932	-0.863252
MGH106-P7-F02	0.736703	0.270442	0.188648	0.253643	0.827705	-1.0647	-0.464124
MGH106-P7-E09	0.673835	0.331005	0.241489	0.296457	0.723364	-0.411882	-0.665654
MGH106-P3-F12	0.378255	0.511076	0.49201	0.242673	0.720838	1.01579	-2.23553
MGH106-P2-D02	0.358645	0.452651	0.497004	0.236865	0.608173	-0.122715	-1.80176
MGH106-P7-G08	0.430474	0.43507	0.297331	0.194524	0.644612	0.129692	-1.57217
MGH106-P2-H03	0.828454	0.369182	0.143907	0.483314	0.596482	-0.950121	-0.57487
MGH106-P2-A05	0.448536	0.502002	0.396724	0.449896	0.744838	1.23613	-1.89204
MGH106-P3-H05	0.487016	0.473891	0.32349	0	0.716948	-0.29747	-1.72564
MGH106-P7-F11	0.499068	0.497609	0.387393	0.205073	0.821813	0.257694	-1.84366
MGH106-P2-F05	0.430573	0.556695	0.45725	0.148574	0.775131	-0.495656	-1.7115
MGH106-P2-F07	0.514941	0.468108	0.279706	0.191629	0.83861	-0.410936	-1.66483
MGH106-P7-H10	0.422794	0.61725	0.518346	0.15457	0.733737	1.35804	-2.22439
MGH106-P3-A06	0.443333	0.574232	0.418944	0.233988	0.655293	0.365814	-1.88331
MGH106-P7-H04	0.596675	0.407316	0.337674	0.257616	0.682838	-0.71874	-1.59135
MGH106-P2-B06	0.479354	0.358309	0.372027	0.293876	0.546606	-0.835621	-1.72498
MGH106-P2-B07	0.605377	0.432223	0.34853	0.189516	0.550412	1.02559	-1.26182
MGH106-P7-C04	0.485923	0.491901	0.487007	0.160962	0.55679	2.18804	-2.2878
MGH106-P2-F03	0.400859	0.368001	0.439931	0.136359	0.619171	0.647947	-1.82145
MGH106-P2-G06	0.430249	0.499078	0.541483	0.197159	0.672761	1.68543	-2.2374
MGH106-P7-F08	0.450513	0.4833	0.541237	0.190945	0.714773	1.4219	-2.03604
MGH106-P3-E03	0.413766	0.482267	0.342428	0.183146	0.716494	-0.294064	-1.61225
MGH106-P7-A05	0.534585	0.491795	0.34031	0.179735	0.818357	0.351662	-1.63393
MGH106-P2-B02	0.331966	0.493344	0.363619	0.0958385	0.761433	0.799436	-1.82664
MGH106-P2-D07	0.530818	0.330659	0.26796	0.152091	0.806051	-0.479031	-1.8078
MGH106-P2-G07	0.729803	0.285004	0.25886	0.456939	0.72628	-1.11738	-0.775602
MGH106-P2-C05	0.743023	0.445609	0.100285	0.145107	0.774603	-1.17685	-1.13836
MGH106-P3-C10	0.286942	0.366374	0.353765	0.285511	0.440035	1.6983	-1.8549
MGH106-P3-D09	0.542543	0.533914	0.387929	0.187048	0.632882	1.10254	-1.62868
MGH106-P3-E07	0.643851	0.375038	0.222574	0.102498	0.770584	-1.14405	-1.71629
MGH106-P3-C07	0.804737	0.314919	0.176995	0.217047	0.676209	-1.11541	-0.858157
MGH106-P2-H09	0.457742	0.370382	0.337953	0.15677	0.535312	1.04227	-2.00099
MGH106-P3-E08	0.23892	0.289602	0.50916	0.220215	0.471724	1.89092	-2.08428
MGH106-P7-D10	0.522746	0.481592	0.288748	0.0971767	0.682989	-0.172197	-1.66973
MGH106-P3-G09	0.45592	0.524115	0.41278	0.0994328	0.748672	1.19946	-2.23201
MGH106-P7-A01	0.796785	0.27738	0.287245	0.511777	0.650739	-0.765913	-0.478404
MGH106-P3-C06	0.439558	0.388379	0.363227	0.181855	0.662849	1.25602	-1.88306
MGH106-P3-G01	0.480395	0.491386	0.318564	0.299807	0.662427	0.727509	-1.74454
MGH106-P3-A09	0.542891	0.532486	0.457943	0.135525	0.758932	0.761125	-2.13275
MGH106-P7-H01	0.490381	0.646371	0.438131	0.112033	0.696592	0.93903	-2.0038
MGH106-P2-E08	0.415102	0.604694	0.32467	0.235665	0.707391	0.996101	-2.0699
MGH106-P3-E01	0.727797	0.428417	0.285556	0.282171	0.716583	-0.982523	-1.24715
MGH106-P7-C10	0.406329	0.460243	0.425645	0.258005	0.688583	1.05783	-2.01883
MGH106-P3-F05	0.35141	0.355576	0.50482	0.23666	0.408422	1.68083	-2.02042
MGH106-P3-D05	0.488626	0.510383	0.275353	0.303439	0.78319	0.767629	-1.37196
MGH106-P2-H02	0.288432	0.261372	0.356205	0.180122	0.449303	-1.12638	-1.52421
MGH106-P3-B11	0.489627	0.520121	0.370053	0.022257	0.713407	-0.205968	-1.64411
MGH106-P2-D12	0.381935	0.426797	0.318545	0.309087	0.609676	0.860035	-1.88105
MGH106-P7-F07	0.636049	0.266956	0.240771	0.310813	0.456661	0.81977	0.635483
MGH106-P3-C04	0.561145	0.311432	0.340199	0.183278	0.674794	-1.38501	-1.58137
MGH106-P7-E12	0.402763	0.383551	0.459539	0.329081	0.651361	1.55058	-1.96353
MGH106-P3-H02	0.300432	0.410156	0.574452	0.242752	0.61229	1.28432	-2.19176
MGH106-P7-H12	0.442592	0.509402	0.429453	0.277272	0.699375	1.43506	-1.89805
MGH106-P3-F01	0.319981	0.505079	0.518934	0.149553	0.490256	1.95995	-2.35265
MGH106-P2-H04	0.3781	0.486408	0.54386	0.153936	0.570148	1.32798	-2.25727
MGH106-P2-D10	0.339901	0.241303	0.57267	0.242483	0.48754	0.793747	-1.78551
MGH106-P7-B11	0.438964	0.415712	0.324825	0.142588	0.755798	0.808528	-1.90036
MGH106-P3-B04	0.714664	0.219298	0.172889	0.423348	0.528122	0.550383	1.00385
MGH106-P7-E05	0.200842	0.390436	0.50924	0.260609	0.339483	2.55129	-2.33762
MGH106-P7-H08	0.402663	0.360488	0.559045	0.224035	0.585813	1.44185	-1.71204
MGH106-P2-D03	0.791955	0.349826	0.244504	0.477967	0.656121	-1.24409	-0.372997
MGH106-P3-H08	0.730954	0.342325	0.213027	0.451327	0.761912	0.611351	0.220642
MGH106-P2-A03	0.865951	0.335325	0.060465	0.352785	0.782687	-1.07359	-1.09028
MGH106-P3-F07	0.420128	0.398368	0.397666	0.149057	0.607044	1.3087	-1.78467
MGH106-P3-H11	0.556372	0.172964	0.230117	0.521096	0.379771	1.81184	1.36383
MGH106-P3-A11	0.308478	0.276557	0.335468	0.171711	0.722747	-0.516183	-1.70908
MGH106-P2-A11	0.244948	0.547302	0.536412	0.259865	0.657116	1.75294	-2.17261
MGH106-P3-A08	0.316551	0.338163	0.452665	0.299874	0.643579	0.925856	-1.77352
MGH106-P7-H07	0.444732	0.567881	0.440154	0.233765	0.609644	0.641163	-2.01295
MGH106-P3-C11	0.436198	0.483807	0.286062	0.138351	0.850843	-1.01056	-1.92565
MGH106-P3-B07	0.46058	0.66883	0.55405	0.126332	0.820905	1.18975	-2.24344
MGH106-P7-E04	0.33142	0.532533	0.479234	0.212666	0.536613	1.15976	-1.86031
MGH106-P3-A02	0.488993	0.537017	0.357017	0.234237	0.768529	0.359286	-1.95201
MGH106-P2-B08	0.494144	0.349573	0.425916	0.332024	0.581598	-0.678889	-1.51823
MGH106-P2-G12	0.200739	0.300137	0.382814	0.381302	0.481972	1.3453	-2.12601
MGH106-P3-E12	0.42473	0.389016	0.402213	0.235892	0.549396	1.0239	-2.04416
MGH106-P2-G10	0.288708	0.520114	0.588462	0.181201	0.363362	2.39133	-2.48245
MGH106-P7-D06	0.221952	0.316975	0.634616	0.16873	0.468692	1.84885	-1.87359
MGH106-P3-G04	0.231595	0.279694	0.520105	0.28456	0.298208	1.97541	-1.97472
MGH106-P7-A10	0.385097	0.477951	0.459921	0.27438	0.711084	1.36884	-1.89414
MGH106-P3-G11	0.384602	0.365464	0.364418	0.255708	0.658248	0.184319	-1.43649
MGH106-P2-F06	0.762872	0.356682	0.300438	0.326114	0.749316	-1.08803	-0.409343
MGH106-P2-B03	0.259186	0.387642	0.459551	0.209661	0.491666	1.26011	-1.97542
MGH106-P2-E03	0.318941	0.289568	0.438866	0.297576	0.388837	1.87934	-2.15295
MGH106-P2-F01	0.339385	0.247184	0.38362	0.200302	0.382207	1.16381	-1.77959
MGH106-P2-H10	0.437351	0.146941	0.282548	0.258256	0.41627	1.3114	0.313208
MGH106-P2-B11	0.374223	0.413995	0.34709	0.157269	0.701501	0.584939	-1.6831
MGH106-P3-B01	0.51165	0.39464	0.281679	0.400388	0.674766	1.29892	-1.4305
MGH106-P3-F04	0.629909	0.182084	0.329376	0.350949	0.475234	1.52958	1.34971
MGH106-P3-G10	0.497967	0.294385	0.311235	0.255697	0.560878	-0.720611	-1.7391
MGH106-P7-B09	0.443242	0.339475	0.355838	0.307635	0.640554	0.279334	-1.79527
MGH106-P7-C08	0.353364	0.418539	0.354676	0.179117	0.702712	1.60549	-2.20579
MGH106-P2-F10	0.232102	0.237387	0.555666	0.355526	0.439224	1.98586	-1.92616
MGH106-P2-A07	0.265232	0.354725	0.411541	0.311603	0.455794	2.25389	-2.28338
MGH106-P2-A06	0.30887	0.326636	0.598399	0.241208	0.425044	1.3646	-2.07841
MGH106-P7-D04	0.71849	0.240727	0.22645	0.307264	0.713859	-1.54104	-1.12269
MGH106-P3-C08	0.411414	0.338457	0.317684	0.131716	0.673158	0.600835	-1.71384
MGH106-P7-F06	0.170282	0.264441	0.40428	0.305981	0.324066	1.46009	-1.9842
MGH106-P2-B05	0.374436	0.39617	0.612431	0.173999	0.593414	1.05636	-2.11855
MGH106-P2-D04	0.301801	0.306085	0.579266	0.259971	0.476437	1.59291	-2.11279
MGH106-P2-E12	0.236677	0.473014	0.574482	0.230686	0.425794	1.68132	-2.24665
MGH106-P3-G02	0.642456	0.289305	0.265561	0.356139	0.70406	-1.06348	-0.792232
MGH106-P3-G05	0.651366	0.178911	0.33987	0.585525	0.234918	2.21814	1.98533
MGH106-P3-H03	0.680767	0.214615	0.206543	0.493716	0.571183	1.08426	0.836132
MGH106-P3-D03	0.427189	0.344842	0.434463	0.299445	0.664648	1.21168	-1.53384
MGH106-P3-A10	0.203588	0.300625	0.529299	0.208299	0.30714	2.08227	-1.92249
MGH106-P2-G08	0.311497	0.320843	0.594544	0.241187	0.591638	0.826384	-1.68146
MGH106CD3POSP1-F06	0.483407	0.0930675	0.403869	0.523137	0.282024	1.65865	1.5437
MGH113-P10-D09	0.242458	0.214599	0.409278	0.404502	0.413845	1.40178	0.0447907
MGH113-P8-G05	0.472782	0.156574	0.339932	0.553619	0.364235	0.250716	-0.286716
MGH113-P10-D05	0.378036	0.278317	0.317981	0.332998	0.34483	0.62809	-0.855516
MGH113-P9-D12	0.510021	0.226219	0.327019	0.377055	0.524115	-0.459347	-0.643861
MGH113-P8-E07	0.553024	0.148114	0.219931	0.374543	0.494304	-1.23632	0.405878
MGH113-P8-D08	0.673742	0.168586	0.330059	0.413681	0.503455	-1.56085	-0.559028
MGH113-P8-D09	0.519481	0.173732	0.231868	0.270158	0.503428	-1.08927	-0.71594
MGH113-P10-C02	0.470048	0.290549	0.336898	0.357831	0.334736	1.58753	-1.85435
MGH113-P8-E09	0.549916	0.0653432	0.294732	0.436366	0.532977	-1.19821	-0.318023
MGH113-P10-D04	0.493118	0.0521011	0.336777	0.441845	0.262871	-0.00114236	0.959479
MGH113-P10-D06	0.543851	0.15592	0.228256	0.381437	0.501778	-1.74505	-0.630313
MGH113-P8-E10	0.577321	0.106975	0.241797	0.562121	0.406252	-0.89984	0.106673
MGH113-P8-A10	0.567732	0.0807916	0.31038	0.334248	0.373237	-0.363373	0.171115
MGH113-P10-A11	0.574	0.0977082	0.396332	0.409859	0.488522	-1.39417	-0.172231
MGH113-P9-A06	0.646212	0.159464	0.215245	0.489011	0.480346	-1.03313	0.260648
MGH113-P9-E03	0.483223	0.122516	0.24033	0.397267	0.411689	-1.56338	-0.000587131
MGH113-P9-C09	0.642382	0.125487	0.303324	0.599817	0.367398	-1.54098	-0.480541
MGH113-P10-C01	0.62785	0.0631867	0.29507	0.503655	0.529632	-0.765656	0.631979
MGH113-P9-B05	0.534557	0.288907	0.278765	0.309638	0.588956	-0.08988	-0.902376
MGH113-P8-F07	0.600581	0.272376	0.26156	0.50666	0.571001	-0.704978	-0.738434
MGH113-P9-H12	0.538227	0.12563	0.19447	0.548922	0.401283	0.0642811	0.335774
MGH113-P10-D12	0.486865	0.118421	0.288479	0.360156	0.359571	-0.757596	0.212994
MGH113-P9-D02	0.520821	0.095766	0.266088	0.518987	0.453253	-1.23652	-0.708115
MGH113-P10-E07	0.574064	0.179696	0.282574	0.357903	0.463965	1.68307	-1.60402
MGH113-P8-C08	0.591802	0.165026	0.298018	0.415365	0.535455	-1.84944	-1.1245
MGH113-P9-A03	0.546128	0.147843	0.267568	0.282904	0.45837	-0.941883	-1.31679
MGH113-P10-G09	0.467881	0.182266	0.302949	0.366106	0.406868	-1.11324	-0.0488926
MGH113-P8-B10	0.538178	0.265435	0.208799	0.402743	0.496653	-1.29947	-0.876362
MGH113-P10-B01	0.493118	0.18741	0.239279	0.282187	0.42259	-1.51728	-1.35868
MGH113-P10-G04	0.473148	0.10284	0.255672	0.331471	0.415823	-1.49659	-0.842047
MGH113-P9-D03	0.629127	0.200732	0.308013	0.477599	0.475406	-0.835277	-0.226606
MGH113-P9-F10	0.653092	0.0993864	0.235484	0.52146	0.381915	-1.15518	-0.0554103
MGH113-P8-A01	0.70773	0.207397	0.203853	0.424452	0.446473	0.8572	0.560282
MGH113-P8-D01	0.595336	0.153813	0.191022	0.625511	0.476103	-0.150614	0.586986
MGH113-P10-A08	0.524291	0.208628	0.332763	0.462653	0.503885	-0.23328	-0.191197
MGH113-P10-B05	0.589519	0.141756	0.245888	0.406734	0.384751	-0.881954	-0.152295
MGH113-P10-D10	0.608126	0.141271	0.232938	0.370242	0.549184	-1.26727	-0.286761
MGH113-P9-B07	0.522039	0.130301	0.304377	0.358618	0.350874	1.01978	0.0469679
MGH113-P8-A09	0.564797	0.160392	0.328284	0.411585	0.460052	0.977294	-0.907111
MGH113-P10-F10	0.60099	0.212151	0.278555	0.509461	0.455171	-1.10592	-1.04267
MGH113-P10-G11	0.60012	0.198842	0.316126	0.281462	0.544621	-1.25753	-0.728393
MGH113-P10-F06	0.563058	0.152602	0.310803	0.389604	0.450373	0.0753405	0.0868
MGH113-P10-H05	0.624612	0.135008	0.250923	0.307592	0.518498	-0.964737	-0.467101
MGH113-P10-A01	0.606045	0.155288	0.331419	0.437732	0.509658	-0.830111	-1.49916
MGH113-P9-F11	0.438246	0.415555	0.24037	0.315042	0.45262	1.56628	-1.21357
MGH113-P8-B03	0.44088	0.194581	0.265573	0.399606	0.4082	-0.841988	-0.244405
MGH113-P9-F01	0.586569	0.0771352	0.31763	0.369974	0.324936	0.3282	-0.778956
MGH113-P10-H06	0.51481	0.130391	0.286993	0.361416	0.445435	-1.4579	-0.261284
MGH113-P10-E04	0.463143	0.231157	0.314065	0.222775	0.584555	-0.914995	-0.999542
MGH113-P9-F09	0.596697	0.098121	0.263509	0.319411	0.441424	-0.512415	0.288714
MGH113-P8-C10	0.573087	0.122676	0.236304	0.380763	0.535915	0.0245343	0.287473
MGH113-P9-G05	0.489363	0.406421	0.242992	0.248874	0.562367	1.04322	-1.45839
MGH113-P10-E02	0.468002	0.255112	0.274042	0.247634	0.726214	-1.17544	-1.05216
MGH113-P8-D05	0.706489	0.234531	0.221298	0.519609	0.586898	-1.12388	-0.613273
MGH113-P10-G03	0.611564	0.190705	0.238802	0.576404	0.421802	-1.13583	-0.442772
MGH113-P9-F07	0.549813	0.173354	0.254721	0.372215	0.459154	-0.340709	0.564232
MGH113-P8-D12	0.457807	0.265285	0.320347	0.337171	0.382341	1.9241	-0.0018264
MGH113-P10-F05	0.470089	0.341306	0.403429	0.364196	0.328339	2.20216	-1.32288
MGH113-P10-H01	0.597312	0.305135	0.269867	0.403287	0.447478	0.270117	-0.977532
MGH113-P10-E03	0.76069	0.21186	0.210492	0.513391	0.567346	-0.357963	-0.585814
MGH113-P8-E02	0.40912	0.151797	0.304897	0.29334	0.426431	-1.32552	-0.807233
MGH113-P9-B03	0.645379	0.185245	0.212324	0.393022	0.498612	-1.52601	-1.17825
MGH113-P10-C04	0.673187	0.137319	0.263074	0.605811	0.6141	-0.0981196	0.260209
MGH113-P9-A12	0.659255	0.194791	0.290618	0.419992	0.554746	-1.59714	-0.675681
MGH113-P10-H08	0.578911	0.248654	0.153834	0.170574	0.662984	-1.4457	-1.14201
MGH113-P9-D08	0.663841	0.21121	0.381893	0.362692	0.572082	-0.925948	-1.07587
MGH113-P10-B12	0.558643	0.0561151	0.298212	0.474166	0.443934	0.788667	0.551074
MGH113-P8-B07	0.579313	0.196077	0.243232	0.460531	0.515249	-1.11277	-0.659105
MGH113-P8-B09	0.725842	0.176102	0.161887	0.471813	0.543393	-1.38062	-1.0971
MGH113-P9-B02	0.675649	0.164521	0.214143	0.287099	0.611612	-1.18727	-0.616169
MGH113-P9-A09	0.669014	0.146615	0.26198	0.385299	0.474033	-1.21701	-0.332895
MGH113-P9-G01	0.632563	0.191215	0.275744	0.325578	0.715824	-0.85551	-0.647948
MGH113-P9-A10	0.53661	0.251369	0.282236	0.233725	0.449505	-1.22164	-1.27638
MGH113-P10-C09	0.633297	0.103852	0.19236	0.423717	0.426477	-1.41284	-0.278552
MGH113-P9-B06	0.714527	0.230805	0.19398	0.463883	0.607855	-0.812953	-0.805161
MGH113-P9-G10	0.586622	0.117555	0.294861	0.472394	0.464345	-1.72706	-0.056269
MGH113-P10-D03	0.530864	0.190035	0.294933	0.396195	0.448898	-1.58191	-0.994506
MGH113-P9-C04	0.602055	0.235701	0.157809	0.395832	0.448499	-1.64382	-0.978351
MGH113-P8-G07	0.602657	0.177583	0.234484	0.417677	0.494137	0.623836	0.529252
MGH113-P9-A02	0.615555	0.18815	0.27846	0.48028	0.430793	-1.10332	0.425553
MGH113-P10-H04	0.66345	0.122528	0.238062	0.396845	0.472839	-1.40481	-0.892656
MGH113-P9-A04	0.551315	0.225502	0.257681	0.363301	0.452757	-0.400977	-0.477674
MGH113-P8-H02	0.457812	0.244719	0.358818	0.288325	0.505449	-1.38822	-0.793011
MGH113-P9-C03	0.501803	0.226943	0.277649	0.33201	0.412254	-0.656201	-0.71147
MGH113-P9-H03	0.593186	0.117804	0.225953	0.295869	0.358635	-0.901643	-0.39238
MGH113-P10-G06	0.650161	0.20199	0.302917	0.405929	0.620553	-0.820493	-0.86397
MGH113-P10-B09	0.647135	0.198134	0.32403	0.432071	0.450405	-1.31585	-0.779506
MGH113-P9-H02	0.5912	0.239545	0.241493	0.49168	0.451808	-0.660627	-0.352645
MGH113-P8-F05	0.606679	0.110646	0.207098	0.60774	0.400781	-0.437264	0.149871
MGH113-P9-B09	0.714027	0.151821	0.295642	0.585413	0.467839	-0.59775	0.144036
MGH113-P10-G12	0.57484	0.179424	0.180183	0.467262	0.526976	-1.07421	-0.718603
MGH113-P8-B04	0.627131	0.170664	0.390419	0.448197	0.620416	0.808683	0.891764
MGH113-P8-G12	0.717639	0.212567	0.223979	0.464547	0.379037	-1.32195	-0.921139
MGH113-P10-B04	0.572818	0.187018	0.301106	0.448976	0.440386	0.569392	0.355371
MGH113-P9-A07	0.659142	0.137778	0.238573	0.471147	0.645907	-1.57237	-0.174483
MGH113-P10-A05	0.672296	0.135738	0.262552	0.464147	0.485928	0.138665	0.00279878
MGH113-P8-E12	0.53294	0.133996	0.340235	0.607076	0.417821	-0.238869	-0.747871
MGH113-P9-B04	0.574594	0.155805	0.200796	0.45688	0.527074	0.656414	0.707672
MGH113-P9-A08	0.661381	0.183449	0.289953	0.432436	0.558747	-1.59058	-0.651164
MGH113-P8-F11	0.605457	0.192456	0.241708	0.384959	0.416409	-1.24069	0.0794226
MGH113-P9-E01	0.550838	0.110116	0.263718	0.298696	0.559119	-1.62036	-0.751245
MGH113-P10-C11	0.588642	0.0981472	0.266034	0.445662	0.533008	-1.72025	-0.601688
MGH113-P8-G09	0.540971	0.194727	0.213901	0.445633	0.499429	-0.949113	-0.7076
MGH113-P10-B07	0.662763	0.183516	0.18306	0.364165	0.56864	-1.49421	-0.212329
MGH113-P9-E10	0.623069	0.218787	0.174241	0.491546	0.388002	-1.15226	-1.02612
MGH113-P8-D04	0.418003	0.292524	0.332664	0.25513	0.363859	-0.301245	-0.291046
MGH113-P8-C05	0.666446	0.265701	0.160899	0.343319	0.624219	-0.463705	-0.377521
MGH113-P8-G10	0.573681	0.279838	0.447258	0.296985	0.432023	0.840265	0.127191
[truncated: 4,865 more rows]

## Sheet: Figure 1-S2C
# Source Data Figure 2-figure supplement 1C
NAME	X	Y	FOSL1	VDR	SP100	ELF4	BNC2	OLIG2	SOX11	ASCL1	SALL2	POU3F3
BT1160-P1-A01	0.997969	1.72766	0	0.0307921	0.0617493	0	0.0690579	0.320207	0.59296	0.531533	0	0
BT1160-P1-A02	-0.00264076	0.874847	0	0	0.0749155	0	0	0.653894	0.545291	0.545042	0.327762	0
BT1160-P1-A03	0.868478	1.36548	0	0	0.0959521	0	0	0.318385	0.588534	0.389512	0	0
BT1160-P1-A04	1.14896	1.74454	0	0	0.0392699	0	0	0.392619	0.390364	0.575348	0	0
BT1160-P1-A05	0.629588	1.02565	0	0	0.0264131	0	0	0.38855	0.439093	0.125389	0	0
BT1160-P1-A06	-0.244504	1.34255	0	0	0.0569564	0	0	0.808551	0.340527	0.3747	0.0159525	0
BT1160-P1-A07	1.5138	1.60816	0	0	0.0203519	0	0	0.67886	0.640332	0.678248	0	0
BT1160-P1-A08	-0.186686	1.45066	0	0	0.109989	0	0	0.730191	0.548941	0	0.413505	0
BT1160-P1-A09	0.366832	1.24593	0	0.0266273	0.0668985	0	0	0.526492	0.522146	0.255179	0.0421567	0
BT1160-P1-A10	0.653169	1.63531	0	0.0476066	0.101129	0	0	0.559243	0.638712	0.399559	0	0
BT1160-P1-A11	0.896863	1.20047	0	0	0.14545	0	0	0	0.67194	0.474736	0	0
BT1160-P1-A12	0.178981	1.46801	0	0	0.0803374	0	0	0.425554	0.606237	0.268419	0.168601	0
BT1160-P1-B01	0.367147	1.09128	0	0	0.0437887	0	0	0.453727	0.452325	0.493211	0	0
BT1160-P1-B02	0.719448	1.56789	0	0	0.0647285	0	0	0.555231	0.498694	0.25856	0.470061	0
BT1160-P1-B03	0.483917	1.27755	0	0	0.103735	0	0	0.454518	0.533188	0.47598	0	0
BT1160-P1-B04	0.520121	1.21348	0	0	0.0429266	0	0	0.285068	0.479451	0.0419337	0	0
BT1160-P1-B05	1.12125	1.26462	0	0	0.111867	0	0	0.523158	0.697697	0	0	0
BT1160-P1-B06	0.543658	1.32476	0	0	0.116307	0	0	0.622202	0.513146	0.688284	0	0
BT1160-P1-B07	0.730946	1.32691	0	0	0.0598447	0	0	0.49757	0.696944	0.425592	0	0
BT1160-P1-B08	1.39901	1.68413	0	0	0.199003	0	0	0.637646	0.741453	0	0	0
BT1160-P1-B09	0.353965	1.25914	0	0	0.0672064	0	0	0.454066	0.582123	0.373949	0.512448	0
BT1160-P1-B10	-0.473905	0.415894	0	0	0	0	0	0	0.577218	0.547319	0	0
BT1160-P1-B11	-0.192233	1.18092	0	0	0.0936546	0	0	0.693088	0.542884	0.513	0	0
BT1160-P1-B12	-0.690902	1.06538	0	0.0495484	0.0710213	0	0	0.610829	0.468169	0	0	0
BT1160-P1-C01	0.95309	1.33972	0	0	0	0	0	0.811122	0.586857	0.316859	0	0
BT1160-P1-C02	0.221374	1.43073	0	0	0.0762482	0	0	0.489375	0.583629	0.349793	0	0
BT1160-P1-C04	-0.115815	1.43682	0	0.0493072	0.114099	0	0	0.73508	0.450683	0.338936	0	0
BT1160-P1-C07	-0.0321206	1.41607	0	0.116813	0	0	0	0.694784	0.4342	0.562566	0	0
BT1160-P1-C08	1.28376	1.56993	0	0	0.0962204	0	0	0.42058	0.563895	0.500934	0	0
BT1160-P1-C09	-0.0902878	1.31907	0	0	0.0290111	0	0	0.602577	0.575564	0	0	0
BT1160-P1-C10	0.842603	1.52602	0	0.0250503	0	0	0	0.596657	0.546922	0.419994	0	0
BT1160-P1-C11	1.37868	1.87975	0	0.0366754	0.0988874	0	0	0.68218	0.734598	0.452565	0	0
BT1160-P1-C12	0.558264	1.62314	0	0	0.0856244	0	0	0.537273	0.341976	0.414595	0	0
BT1160-P1-D01	-0.117695	1.25915	0	0	0.149667	0	0	0.856392	0.590633	0	0.224166	0
BT1160-P1-D02	0.191799	0.700457	0	0	0.0517207	0	0	0.342729	0.715571	0	0	0
BT1160-P1-D03	1.48163	1.89936	0	0	0.108854	0	0	0.440601	0.715685	0.446485	0	0
BT1160-P1-D04	0.893512	1.21848	0	0	0.0364388	0	0	0.659489	0.499048	0.450076	0	0
BT1160-P1-D05	0.20359	0.945431	0	0	0.133304	0	0	0.678408	0.353736	0.33781	0.213785	0
BT1160-P1-D06	0.992812	1.50871	0	0	0	0	0	0.810925	0.720784	0.527002	0	0
BT1160-P1-D07	0.307104	1.22451	0	0	0.0603227	0	0	0.5786	0.509747	0.491591	0	0
BT1160-P1-D08	-0.233796	1.33828	0	0	0	0	0	0.543871	0.435204	0	0	0
BT1160-P1-D09	-0.832722	1.36363	0	0	0.0267855	0	0	0.337742	0.557998	0.14519	0	0
BT1160-P1-D10	1.39164	1.91965	0	0	0.0404957	0	0	0.76184	0.791586	0.425217	0	0
BT1160-P1-D11	1.1044	1.5651	0	0	0.103606	0	0	0.639624	0.570682	0.475452	0	0
BT1160-P1-D12	0.66105	1.44465	0	0	0.0916064	0	0	0.613937	0.72967	0.695361	0.395651	0
BT1160-P1-E01	1.20256	1.63216	0	0	0	0	0	0.414519	0.477899	0.64975	0	0
BT1160-P1-E02	0.0792336	1.30513	0	0	0	0	0	0.416794	0.187722	0.481509	0	0
BT1160-P1-E03	0.431036	1.45812	0	0	0.210484	0	0	0.437168	0.495956	0.322716	0	0
BT1160-P1-E04	0.784205	1.47512	0	0	0	0	0	0.579335	0.520424	0.480253	0	0
BT1160-P1-E06	0.764373	1.30519	0	0	0	0	0	0	0.553926	0	0	0
BT1160-P1-E07	0.721335	0.922691	0	0	0.0678222	0.445648	0	0.494038	0.536519	0	0	0
BT1160-P1-E08	0.80619	1.59426	0	0	0.104641	0	0	0.736535	0.613366	0.420229	0	0
BT1160-P1-E09	1.11911	1.54964	0	0	0.11594	0	0	0.54096	0.684203	0.428773	0	0
BT1160-P1-E10	0.433341	1.36172	0	0	0	0	0	0.68957	0.53272	0.503927	0	0
BT1160-P1-E11	-0.281212	1.06045	0	0.0266273	0.088567	0	0	0.574771	0.374805	0.56185	0	0
BT1160-P1-E12	-0.145923	0.849166	0	0	0.0806277	0	0	0.775545	0.385185	0.429947	0.091187	0
BT1160-P1-F01	2.29911	2.22363	0	0	0.189723	0	0	0	0.77248	0	0	0
BT1160-P1-F03	1.5657	1.59314	0	0.0274128	0.126086	0	0	0	0.396272	0	0	0
BT1160-P1-F04	-0.333874	1.26199	0	0	0.0532059	0	0	0.532779	0.45974	0.183817	0	0
BT1160-P1-F05	1.20225	1.61202	0	0.034899	0.0420615	0	0	0.467983	0.65694	0.313725	0	0
BT1160-P1-F06	0.0564466	0.719784	0	0	0.0427536	0	0	0.609105	0.518405	0.289288	0	0
BT1160-P1-F07	0.588537	1.28585	0	0	0.0731268	0	0	0.694812	0.619857	0.434595	0.767911	0
BT1160-P1-F10	0.442518	0.886227	0	0	0.030297	0	0	0.586753	0.575918	0.487236	0.360738	0
BT1160-P1-F11	0.630342	1.49105	0	0.0242589	0.0424075	0	0	0.734755	0.51334	0.325662	0.0868186	0
BT1160-P1-F12	1.21713	1.65825	0	0	0.0535343	0	0	0.569035	0.673994	0	0	0
BT1160-P1-G02	-0.255415	1.11124	0	0.0145806	0.106311	0	0	0.66873	0.597899	0.562449	0	0
BT1160-P1-G03	0.496774	1.36795	0	0	0.0451595	0	0	0.478255	0.57942	0.404771	0	0
BT1160-P1-G04	0.122586	1.27066	0	0.0226679	0.0793228	0	0	0.596982	0.520515	0.342223	0	0
BT1160-P1-G05	0.891713	1.67748	0	0	0.0353685	0	0	0.429129	0.574367	0.550758	0	0
BT1160-P1-G06	0.487105	1.19209	0	0	0.0796131	0	0	0.582019	0.490527	0.512648	0.809848	0
BT1160-P1-G07	1.74775	1.1384	0	0	0.0991528	0	0	0.288304	0.688298	0.673225	0	0
BT1160-P1-G08	1.00205	1.36459	0	0	0.0548451	0	0	0.614672	0.574561	0.514772	0.0311673	0
BT1160-P1-G09	0.348653	1.38143	0	0.0216033	0.0714744	0	0	0.66767	0.296714	0.466567	0.679106	0
BT1160-P1-G10	0.844528	1.43055	0	0	0.0355473	0	0	0.570207	0.637104	0.503316	0	0
BT1160-P1-G11	0.767962	1.59771	0	0	0.0772775	0	0	0.3956	0.482736	0.51658	0	0
BT1160-P1-G12	0.0248356	0.949625	0	0	0.115696	0	0	0	0.510831	0	0	0
BT1160-P1-H02	0.286622	0.877452	0	0	0.0759521	0	0	0.58014	0.430105	0.408233	0	0
BT1160-P1-H03	0.721331	1.38431	0	0	0.0371498	0	0	0.681389	0.505755	0.158183	0.0568917	0
BT1160-P1-H04	0.12933	1.64896	0	0.0221356	0.0271579	0	0	0.438892	0.587861	0.368315	0	0
BT1160-P1-H05	1.27622	1.63139	0	0	0.105026	0	0	0.135711	0.643172	0	0	0
BT1160-P1-H06	-0.0155999	1.3848	0	0	0	0	0	0.731957	0.422599	0.558446	0	0
BT1160-P1-H08	1.09936	1.45632	0	0	0.110741	0	0	0.588208	0.734016	0.495429	0	0
BT1160-P1-H09	1.46144	1.6138	0	0.00878088	0.0592055	0	0	0.340596	0.549237	0.330955	0.0208214	0
BT1160-P1-H10	0.984384	1.30446	0	0.0189222	0.127596	0	0	0.329208	0.527177	0.320591	0	0
BT1160-P1-H11	1.31485	1.5028	0	0	0.136656	0	0	0.372739	0.68029	0.538329	0.0673985	0
BT1160-P2-A02	0.705487	1.77314	0	0	0	0	0	0.652439	0.408489	0.528505	0	0
BT1160-P2-A03	-0.286433	1.32534	0	0.0567216	0.0867504	0	0	0.538177	0.382892	0.495699	0	0
BT1160-P2-A04	0.364646	1.04747	0	0	0	0	0	0.324446	0.304733	0.483762	0.21965	0
BT1160-P2-A05	1.17596	1.74343	0	0	0	0	0	0.47485	0.606819	0.480687	0	0
BT1160-P2-A06	0.922382	1.43786	0	0	0.078449	0	0	0.669634	0.186136	0.592261	0.614799	0
BT1160-P2-A08	0.334986	1.20355	0	0	0.097691	0	0	0.659136	0.581325	0.626217	0	0
BT1160-P2-A09	0.626075	1.22499	0	0	0	0	0	0.671018	0.360409	0.426837	0	0
BT1160-P2-A10	0.950602	1.60451	0	0	0	0	0	0.637575	0.468694	0.160366	0	0
BT1160-P2-A12	-1.07278	1.73249	0	0	0.179195	0	0	0.393283	0.367333	0.262914	0	0
BT1160-P2-B01	-0.269352	1.19845	0	0	0	0	0	0.705324	0	0	0	0
BT1160-P2-B02	0.816344	1.43708	0	0	0	0	0	0.503787	0.52826	0	0	0
BT1160-P2-B03	2.13843	1.79724	0	0	0.0590457	0	0	0	0.557154	0	0	0
BT1160-P2-B04	-0.162771	1.13456	0	0	0.10139	0	0	0.518241	0.474283	0.469983	0	0
BT1160-P2-B05	-0.181855	1.50475	0	0	0.0983566	0	0	0.552066	0.34671	0.702275	0.286466	0
BT1160-P2-B06	0.335129	1.4007	0	0	0	0	0	0.577766	0.228798	0	0	0
BT1160-P2-B07	1.07334	0.840411	0	0	0.0429266	0	0	0.243557	0.173212	0.617332	0	0
BT1160-P2-B08	1.87708	1.65588	0	0	0.0297471	0	0	0.296131	0.47669	0.277339	0.127401	0
BT1160-P2-B09	-0.0713893	1.33799	0	0.0333659	0.0312119	0	0	0.78066	0.399044	0.537578	0	0
BT1160-P2-B10	0.935275	1.40684	0	0.0734644	0	0	0	0.777933	0.308257	0.499983	0	0
BT1160-P2-B11	0.236031	1.22762	0	0	0.0944684	0.0545174	0	0.794549	0.334733	0	0	0
BT1160-P2-C01	1.64355	1.653	0	0	0	0	0	0.186532	0.361949	0.236095	0	0
BT1160-P2-C03	0.357539	0.950238	0	0	0.027715	0	0	0.492441	0.430413	0.532507	0	0
BT1160-P2-C05	0.548644	1.56963	0	0.141759	0	0	0	0.645275	0.287223	0.369465	0	0
BT1160-P2-C06	1.38989	1.51157	0	0	0	0	0	0.703544	0.627853	0.566604	0	0
BT1160-P2-C07	0.985802	1.41228	0	0	0.0873105	0	0	0.435995	0.396056	0.410181	0	0
BT1160-P2-C09	0.944553	1.0224	0	0	0	0	0	0.718492	0.365189	0	0	0
BT1160-P2-C10	2.04464	1.98723	0	0	0.0413666	0	0	0	0.505333	0	0.736216	0
BT1160-P2-C11	1.23697	1.20026	0	0	0.180104	0	0	0.417189	0.55112	0.0280274	0.0596581	0
BT1160-P2-C12	0.419542	1.28263	0	0.00428238	0.0749155	0	0	0.801953	0.62645	0	0	0
BT1160-P2-D01	0.750556	1.4631	0	0	0	0	0	0.684356	0.397002	0.660079	0.302192	0
BT1160-P2-D02	0.730306	0.809378	0	0	0	0	0	0.260766	0.429044	0.477272	0	0
BT1160-P2-D03	0.888226	0.889312	0	0	0.060481	0	0	0.611591	0.374656	0.19701	0.164374	0
BT1160-P2-D04	0.511621	1.51095	0	0	0	0	0	0.883068	0.164612	0.535359	0	0
BT1160-P2-D05	0.992272	1.53319	0	0	0	0	0	0.761713	0.517264	0.206223	0	0
BT1160-P2-D07	-0.188192	1.09672	0	0	0	0	0	0.72266	0.450728	0.602355	0	0
BT1160-P2-D08	1.52606	1.58212	0	0	0	0	0	0.448853	0.512405	0.511779	0	0
BT1160-P2-D09	0.904084	1.34718	0	0	0.0800486	0	0	0.557025	0.394173	0	0	0
BT1160-P2-D10	1.3083	1.81545	0	0	0	0	0	0.790112	0.358094	0.272022	0	0
BT1160-P2-D11	-0.868004	1.80132	0	0	0.127827	0	0	0.672191	0.407211	0.591498	0	0
BT1160-P2-D12	0.278568	0.834488	0	0	0.09147	0	0	0.524246	0.301972	0.133511	0.117467	0
BT1160-P2-E01	-0.465567	0.275721	0	0	0.0523819	0	0	0.593662	0.323166	0.416449	0	0
BT1160-P2-E02	1.1458	1.55689	0	0	0.117888	0	0	0.706525	0.429124	0.716336	0.243992	0
BT1160-P2-E03	-0.00911706	1.35155	0	0.0545884	0.0980913	0	0	0.519993	0.233075	0.610982	0.196225	0
BT1160-P2-E04	1.68192	-0.789165	0	0	0	0	0	0.0638733	0.374656	0.69711	0	0
BT1160-P2-E05	1.47929	1.43368	0	0	0	0	0	0.498813	0.462591	0.605536	0	0
BT1160-P2-E06	0.677967	1.34645	0	0.0909667	0.052052	0	0	0.70011	0.359326	0.353549	0.133031	0
BT1160-P2-E07	-0.251341	1.30099	0	0	0	0	0	0.662626	0.407679	0.128992	0	0
BT1160-P2-E08	1.8566	1.47202	0	0	0.0695039	0	0	0.0919464	0.414626	0.487013	0	0
BT1160-P2-E09	-0.219052	1.31349	0	0	0.0546809	0	0	0.517647	0.308645	0.518352	0	0
BT1160-P2-E10	0.508061	0.884026	0	0	0.0216935	0	0	0.51078	0.162113	0.537225	0	0
BT1160-P2-E11	1.7936	1.62155	0	0	0	0	0	0.325562	0.540842	0	0	0
BT1160-P2-E12	2.20666	2.16245	0	0	0.0788859	0	0	0	0.61088	0	0	0
BT1160-P2-F01	-0.09711	1.2965	0	0	0	0	0	0.559187	0.226893	0	0	0
BT1160-P2-F03	-0.0980382	1.48612	0	0	0	0	0	0.376879	0.286299	0.497553	0	0
BT1160-P2-F04	2.1627	1.5957	0	0	0	0	0	0	0.460709	0.393785	0	0
BT1160-P2-F05	-0.389738	1.06809	0	0	0	0	0	0.681347	0.151186	0.401191	0	0
BT1160-P2-F06	0.278913	1.64648	0	0	0	0	0	0.669648	0.424915	0	0	0
BT1160-P2-F08	2.5275	2.3302	0	0	0	0	0	0	0.661982	0	0	0
BT1160-P2-F09	0.67226	1.86482	0	0	0.0738745	0	0	0.952456	0.542063	0.581134	0	0
BT1160-P2-F10	1.16632	1.13706	0	0	0.157042	0	0	0	0.463493	0.811384	0	0
BT1160-P2-F11	1.03357	1.4703	0	0	0.0103202	0	0	0.858808	0.508994	0.283067	0	0
BT1160-P2-F12	0.406085	0.765937	0	0	0.145875	0	0	0.533415	0.387786	0.578822	0	0
BT1160-P2-G01	0.148823	1.32532	0	0	0	0	0	0.617243	0.308965	0.753824	0	0
BT1160-P2-G02	-0.584075	1.61086	0	0	0	0	0	0.591231	0.388002	0	0	0
BT1160-P2-G03	1.20314	1.94273	0	0	0	0	0	0.490449	0.608621	0.168382	0.923392	0
BT1160-P2-G04	1.91659	1.66462	0	0	0.136102	0	0	0	0.591637	0.517002	0	0
BT1160-P2-G05	1.9847	2.18103	0	0	0.162203	0	0	0	0.612602	0.367141	0	0
BT1160-P2-G06	0.718459	1.52476	0	0	0	0	0	0	0.16979	0	0	0
BT1160-P2-G07	0.414892	1.2377	0	0	0.0574402	0	0	0.5064	0.127117	0.378467	0	0
BT1160-P2-G08	0.967859	1.27358	0	0	0.0460129	0	0	0.5747	0.422542	0.371683	0	0
BT1160-P2-G09	-0.00334631	1.56012	0	0	0	0	0	0.622655	0.134908	0.43598	0	0
BT1160-P2-G10	1.17531	1.50367	0	0	0.0366176	0	0	0.453798	0.522968	0.49084	0	0
BT1160-P2-G11	1.19659	1.32542	0	0.0560139	0.0355473	0	0	0	0.576431	0.637872	0	0
BT1160-P2-G12	2.20837	2.02773	0	0.01045	0.0870305	0	0	0	0.550914	0.0333936	0	0
BT1160-P2-H02	0.861619	0.668001	0	0	0	0	0	0	0.4445	0.677016	0	0
BT1160-P2-H03	0.312278	1.48522	0	0	0.0512236	0	0	0.616452	0.596268	0.348115	0	0
BT1160-P2-H04	-0.132915	0.918304	0	0	0.0893998	0	0	0.305358	0.262573	0.326108	0	0
BT1160-P2-H05	0.930214	0.946822	0	0	0	0	0	0.502162	0.598036	0.509385	0	0
BT1160-P2-H06	1.263	1.72778	0	0	0.0806277	0	0	0.286015	0.470713	0	0	0
BT1160-P2-H07	1.29302	1.55614	0	0	0	0	0	0	0.729522	0	0	0
BT1160-P2-H10	1.18612	1.52868	0	0	0.0777173	0	0	0.403781	0.502937	0.348115	0.586045	0
BT1160-P2-H11	0.398705	1.19621	0	0	0	0	0	0.415819	0.210524	0.282715	0	0
BT1160-P2-H12	0.559036	1.27086	0	0.0359158	0.135656	0	0	0.75284	0.512542	0.357434	0	0
BT1160-P3-A01	1.81832	-1.36549	0	0	0.0676682	0.764627	0	0	0.204125	0	0	0
BT1160-P3-A02	0.86828	1.60238	0	0	0.0636362	0	0	0.544125	0.376573	0.177584	0	0
BT1160-P3-A03	0.335934	1.26741	0	0	0.0878706	0	0	0.512617	0.411854	0	0	0
BT1160-P3-A04	0.543592	1.60942	0	0	0.0366176	0	0	0.660224	0.352755	0.0594973	0	0
BT1160-P3-A05	1.92988	1.78977	0	0	0.164754	0	0	0	0.328687	0.321788	0	0
BT1160-P3-A06	1.33133	1.68206	0	0	0.106182	0	0	0.683509	0.446496	0.195742	0.0415235	0
BT1160-P3-A07	0.0506903	1.73354	0	0	0.166396	0	0	0.499209	0.420922	0.287492	0.700126	0
BT1160-P3-A08	0.66478	1.32542	0	0	0	0	0	0.336682	0.417774	0.215062	0	0
BT1160-P3-A09	1.14751	1.48667	0	0	0.0559843	0	0	0.482904	0.54172	0.262773	0	0
BT1160-P3-A10	-0.805398	1.58727	0	0	0.036795	0	0	0.81984	0.0635131	0	0	0
BT1160-P3-A11	-0.200491	1.54499	0	0	0	0	0	0.371482	0.367094	0.562014	0	0
BT1160-P3-A12	0.674537	1.38252	0	0.0593074	0.0631656	0	0	0	0.189547	0.651511	0	0
BT1160-P3-B01	-0.0560521	1.09452	0	0	0.120656	0	0	0.570024	0.185657	0	0	0
BT1160-P3-B02	0.667353	1.44602	0	0	0	0	0	0.490152	0.240501	0.356812	0	0
BT1160-P3-B03	0.410354	0.377828	0	0	0.0439602	0	0	0.225769	0.200475	0.264311	0	0
BT1160-P3-B04	1.18617	1.08087	0	0.077667	0.0262254	0	0	0.507291	0.334755	0.784987	0	0
BT1160-P3-B05	0.368399	1.57229	0	0	0.140827	0	0	0.556375	0.331778	0.0828368	0	0
BT1160-P3-B06	-0.137902	1.25834	0	0	0.0994167	0	0	0.718266	0.478652	0.51895	0	0
BT1160-P3-B07	0.277354	1.3568	0	0	0	0	0	0.308848	0.398633	0.532143	0.065485	0
BT1160-P3-B09	1.02915	1.43684	0	0	0.0512236	0	0	0.273723	0.469869	0	0	0
BT1160-P3-B10	2.1603	2.13257	0	0.0512391	0.183506	0	0	0	0.35158	0	0	0
BT1160-P3-B11	1.45125	1.75306	0	0	0.0569564	0	0	0.594905	0.406036	0.446332	0	0
BT1160-P3-B12	-0.188479	1.6707	0	0.0763452	0	0	0	0	0.189866	0.479736	0	0
BT1160-P3-C01	-1.08671	-0.732997	0	0	0.0487179	0	0	0	0.0645169	0.531545	0	0
BT1160-P3-C02	1.2332	1.39889	0	0	0.0207361	0	0	0.454745	0.518485	0.58097	0	0
BT1160-P3-C04	0.0748897	1.21262	0	0	0.0308468	0	0	0.700195	0.365885	0.47706	0	0
BT1160-P3-C05	0.683887	1.36909	0	0	0.207815	0	0	0.731576	0.177524	0	0	0
BT1160-P3-C06	-0.20186	1.21269	0	0	0.308776	0	0	0.491296	0.274756	0.623987	0	0
BT1160-P3-C07	-0.160079	0.908948	0	0	0	0	0	0.455832	0.379436	0.647732	0	0
BT1160-P3-C08	0.393923	1.69209	0	0	0.10477	0	0	0.572737	0.235459	0.580242	0	0
BT1160-P3-C09	0.404323	0.770427	0	0	0.0860467	0	0	0.326142	0.166471	0.409501	0	0
BT1160-P3-C10	2.28689	2.04437	0	0	0.202434	0	0	0	0.586446	0	0.935814	0
BT1160-P3-C11	0.620829	1.50799	0	0	0.089262	0	0	0.658995	0.400367	0.504608	0	0
BT1160-P3-C12	1.06717	1.33044	0	0	0.0308468	0	0	0	0.17206	0.728366	0	0
BT1160-P3-D01	0.0294752	1.05881	0	0	0.0378595	0	0	0.126936	0.225147	0	0	0
BT1160-P3-D02	0.260575	1.65505	0	0	0.0667445	0	0	0.412499	0.362166	0	0.109709	0
BT1160-P3-D03	0.351681	1.59411	0	0	0	0	0	0.605445	0.309626	0.211986	0	0
BT1160-P3-D05	0.924395	0.739066	0	0	0	0	0	0	0.226938	0	0	0
BT1160-P3-D06	-0.0709353	1.40393	0	0	0.0540269	0	0	0.424862	0.301687	0.30849	0	0
BT1160-P3-D07	0.649281	1.06405	0	0	0.0512236	0	0	0.591641	0.296337	0.580618	0.0344492	0
BT1160-P3-D08	1.17315	1.54221	0	0	0	0	0	0.623531	0.517584	0.523739	0	0
BT1160-P3-D09	0.935279	1.35072	0.199059	0.032082	0.0385647	0	0	0.552758	0.307755	0.0339488	0	0
BT1160-P3-D11	0.967003	1.6243	0	0.0389462	0.124566	0	0	0.478891	0.394014	0.648166	0	0
BT1160-P3-D12	1.31073	1.79038	0	0	0.0690464	0	0	0.437662	0.262402	0.518798	0.344319	0
BT1160-P3-E01	1.21357	1.39119	0	0	0.0203519	0	0	0.50924	0.438979	0.0511932	0	0
BT1160-P3-E02	2.13494	1.92309	0.0597051	0	0.104512	0	0	0	0.426557	0.222644	0	0
BT1160-P3-E03	1.10056	1.11658	0	0	0	0	0	0.531734	0.352299	0.54489	0	0
BT1160-P3-E04	-0.407073	1.51513	0	0	0.0335709	0	0	0.610207	0.32498	0.437987	0	0
BT1160-P3-E05	0.634522	1.38351	0	0.0271517	0.0868912	0	0	0.728976	0.436527	0	0	0
BT1160-P3-E06	2.32601	2.05939	0	0	0	0	0	0	0.559549	0	0.120873	0
BT1160-P3-E07	0.302482	1.53183	0	0	0.160824	0	0	0.310232	0.238185	0.672931	0	0
BT1160-P3-E08	2.32218	2.14004	0	0	0.0473691	0	0	0	0.412995	0	0	0
BT1160-P3-E09	0.295953	1.15756	0	0	0	0	0	0.265415	0.402569	0.221998	0	0
BT1160-P3-E11	0.423192	1.41278	0	0	0.0817801	0	0	0.666116	0.302839	0.463668	0.0683483	0
BT1160-P3-E12	1.47215	1.57668	0	0.034899	0.139519	0	0	0	0.305816	0	0	0
BT1160-P3-F01	1.05623	1.72795	0	0	0.0854837	0	0	0.466881	0.505778	0.310861	0	0
BT1160-P3-F02	0.564178	1.57117	0	0	0.0230248	0	0	0.399005	0.351193	0.0387306	0	0
BT1160-P3-F03	0.664417	1.21145	0	0	0.131835	0	0	0.317523	0.204513	0.635853	0	0
BT1160-P3-F04	1.09718	1.25591	0	0	0.0362613	0	0	0.782243	0.410497	0.0586604	0	0
BT1160-P3-F05	2.19026	2.07314	0	0.122694	0	0	0	0	0.602541	0	0.105329	0
BT1160-P3-F06	-0.933729	1.39199	0	0	0.110867	0	0	0.360179	0.268699	0.542636	0	0
BT1160-P3-F07	1.7202	1.87884	0	0	0.0980913	0	0	0.530392	0.552123	0.334981	0.070805	0
BT1160-P3-F08	0.556795	1.4828	0	0	0.0887063	0	0	0.755553	0.0947061	0.535629	0	0
BT1160-P3-F09	1.37035	1.62875	0	0	0.0691989	0	0	0.501879	0.390409	0.535171	0.173388	0
BT1160-P3-F11	0.346932	1.00997	0	0	0.16446	0	0	0.416921	0.133745	0.660431	0.691182	0
BT1160-P3-F12	1.31447	0.797948	0	0	0.0833548	0	0	0.188962	0.32839	0.533329	0	0
BT1160-P3-G01	0.291758	1.64644	0	0	0.0761002	0	0	0.614658	0.358151	0.47422	0	0
BT1160-P3-G02	1.4486	1.55292	0	0	0.146512	0	0	0.629903	0.502515	0.58786	0	0
BT1160-P3-G03	0.592494	1.26386	0	0	0	0	0	0.571055	0.400652	0.0823168	0	0
BT1160-P3-G05	-0.0121434	1.49394	0	0	0.0357262	0	0	0.386897	0.286334	0.525969	0	0
BT1160-P3-G06	1.14182	1.20633	0	0	0	0	0	0.331299	0.378204	0.570712	0	0
BT1160-P3-G07	0.147211	0.829209	0	0	0.134539	0	0	0	0.0298664	0.172948	0	0
BT1160-P3-G08	2.18424	2.03046	0	0	0.247622	0	0	0	0.509279	0	0.0444646	0
BT1160-P3-G09	1.22815	1.45442	0	0	0.050058	0	0	0.6778	0.556275	0.58759	0	0
BT1160-P3-G10	0.697142	1.5581	0	0	0.0530417	0	0	0.355912	0.193608	0.513939	0	0
BT1160-P3-G11	0.285207	1.24442	0	0	0.103087	0	0	0.631174	0.186034	0.615032	0.471238	0
BT1160-P3-G12	2.34459	2.12491	0	0.123818	0.0799034	0	0	0	0.610081	0	0	0
BT1160-P3-H01	0.552646	1.13653	0	0	0.041541	0	0	0.489304	0.501363	0.330544	0	0
BT1160-P3-H03	0.909185	1.8326	0	0	0.060481	0	0	0.448697	0.547173	0.570806	0	0
BT1160-P3-H04	0.654961	1.16289	0	0.0471182	0	0	0	0.592447	0.297307	0.426954	0	0
BT1160-P3-H05	-0.919418	1.51589	0	0	0.154813	0	0	0.551204	0.300307	0.314464	0	0
BT1160-P3-H06	-0.25285	1.0005	0	0	0.0860467	0	0	0.527834	0.358447	0.485957	0.110031	0
BT1160-P3-H07	-0.0417341	0.854822	0	0	0.0615909	0	0	0.516093	0.288911	0	0	0
BT1160-P3-H08	1.03999	1.29109	0	0	0.0235936	0	0	0.587063	0.34152	0.465922	0	0
BT1160-P3-H09	0.0619981	1.25386	0	0.0189222	0.0664352	0	0	0.48816	0.426227	0.385263	0.47468	0
BT1160-P3-H10	-0.700247	0.453481	0	0	0.0518863	0	0	0.769088	0.248326	0	0	0
BT1160-P3-H11	1.19066	1.31703	0	0	0	0	0	0.652043	0.457436	0.292539	0	0
BT1160-P3-H12	1.0351	1.24633	0	0	0.0456712	0	0.0106937	0.164025	0.478242	0.264018	0	0
BT1160-P4-A02	1.80719	1.94075	0	0	0.162203	0	0	0	0.607891	0.365756	0	0
BT1160-P4-A03	0.344635	0.677085	0	0	0.15276	0	0	0	0.273136	0	0	0
BT1160-P4-A04	1.33001	1.58006	0	0	0.0819238	0	0	0.403668	0.532743	0	0	0
BT1160-P4-A06	1.00662	1.47621	0	0	0.0485493	0	0	0.0919464	0.216809	0.456872	0	0
BT1160-P4-A07	-0.992145	1.34026	0	0	0.145557	0	0	0.617102	0.146657	0.466614	0	0
BT1160-P4-A09	-0.0310333	1.36324	0	0	0.173213	0	0	0.229103	0.241071	0.191693	0	0
BT1160-P4-A10	1.24897	1.26171	0	0	0.0788859	0	0	0.304637	0.717978	0.604421	0.376412	0
BT1160-P4-A11	0.665546	1.37924	0	0	0.0931107	0	0	0.470753	0.452679	0	0	0
BT1160-P4-A12	1.05644	1.39376	0	0.203373	0.107076	0	0	0.44022	0.479918	0.182608	0	0
BT1160-P4-B01	-1.11864	1.22398	0	0	0.0863282	0	0	0.684427	0.538698	0	0	0
BT1160-P4-B02	1.44748	1.75047	0	0	0.113976	0	0	0	0.549431	0	0	0
BT1160-P4-B04	1.20401	1.43624	0	0	0.0994167	0	0	0.862128	0.35158	0	0	0
BT1160-P4-B05	0.378647	1.44911	0	0	0	0	0	0.491028	0.279706	0	0	0
BT1160-P4-B07	2.17782	2.05189	0	0	0.127133	0	0	0	0.303102	0	0	0
BT1160-P4-B08	1.2528	1.38955	0	0	0.079031	0	0	0	0.459055	0.587332	0	0
BT1160-P4-B12	2.16949	1.96177	0	0	0.065661	0	0	0	0.546431	0	0.671476	0
BT1160-P4-C01	1.54097	1.94593	0	0	0.0747674	0	0	0.374717	0.304482	0.240895	0	0
BT1160-P4-C02	0.385222	1.36922	0	0	0	0	0	0.419577	0.247699	0.456661	0	0
BT1160-P4-C03	0.627312	1.18257	0	0	0.0875905	0	0	0	0.379288	0.48064	0	0
BT1160-P4-C04	1.37619	1.17669	0	0	0.0998125	0	0	0.29024	0.666157	0	0	0
BT1160-P4-C05	-0.214051	1.04805	0	0	0.0342923	0	0	0.475486	0.0832058	0.468586	0.0825522	0
BT1160-P4-C06	1.08919	1.68652	0	0	0.148201	0	0	0	0.053004	0.109132	0.0930849	0
BT1160-P4-C07	1.24216	1.68548	0	0.0356606	0.0614326	0	0	0.755171	0.594066	0.433938	0	0
BT1160-P4-C08	1.00439	1.66864	0	0	0.0429266	0	0	0.616155	0.471032	0.557308	0	0
BT1160-P4-C09	1.37923	1.7388	0	0	0.0522162	0	0	0.439584	0.412481	0.532941	0	0
BT1160-P4-C11	1.7415	1.36899	0	0	0.0946032	0	0	0	0.278257	0.273478	0	0
BT1160-P4-C12	1.91834	1.84693	0	0	0.105926	0	0	0	0.408683	0	0	0
BT1160-P4-D01	1.79127	1.82908	0	0	0.0359051	0	0	0.274104	0.590667	0	0	0
BT1160-P4-D03	1.75853	-1.18166	0	0	0.125736	0	0	0.311377	0.0404964	0	0	0
BT1160-P4-D04	-0.0276588	1.20233	0	0	0.0247255	0	0	0.971233	0.32263	0.436367	0.29349	0
BT1160-P4-D05	1.15282	1.33862	0	0	0.179005	0	0	0.335198	0.174992	0	0	0
BT1160-P4-D06	1.12076	1.48388	0	0	0	0	0	0.128462	0.246307	0.47064	0	0
BT1160-P4-D07	0.904727	1.05126	0	0	0	0	0	0.782384	0.397972	0.719399	0	0
BT1160-P4-D08	-0.00959281	1.3682	0	0	0.124331	0	0	0.604287	0.325801	0.561733	0	0
BT1160-P4-D09	0.114255	1.31636	0	0	0	0	0	0.692028	0.358174	0.682873	0.137098	0
BT1160-P4-D10	0.391991	1.18997	0	0.0473614	0.0682811	0	0	0.528089	0.200224	0.467929	0	0
BT1160-P4-D11	0.835505	1.32327	0	0	0.165428	0	0	0.578318	0.273672	0.195308	0	0
BT1160-P4-D12	1.84241	1.93428	0	0	0	0	0	0.360447	0.72918	0.677063	0	0
BT1160-P4-E01	-0.107835	1.05383	0	0	0.0836392	0	0	0.501342	0.514835	0.35673	0	0
BT1160-P4-E02	-0.114769	1.15311	0	0	0	0	0	0.595216	0.384877	0	0	0
BT1160-P4-E03	1.08846	1.44499	0	0.192526	0	0	0	0.69022	0.564146	0.463586	0	0
BT1160-P4-E04	2.23757	2.22494	0	0.0831037	0.139519	0	0	0	0.64169	0	0	0
BT1160-P4-E06	0.637345	1.44564	0	0	0	0	0	0.570094	0.347828	0	0.12484	0
BT1160-P4-E08	-0.10211	1.39529	0	0	0	0	0	0.610956	0.29279	0.650267	0	0
BT1160-P4-E09	1.6413	1.41634	0	0	0	0	0	0	0.570671	0.227257	0	0
BT1160-P4-E10	-0.448212	1.44365	0	0	0.124801	0	0	0.788685	0.320326	0	0	0
BT1160-P4-F01	1.44789	1.80375	0	0	0	0	0	0.238174	0.632507	0	0	0
BT1160-P4-F02	1.8358	-0.668145	0	0	0.0647285	0	0	0	0.441363	0.637051	0	0
BT1160-P4-F03	1.33127	1.40279	0	0	0.0900918	0	0	0.499929	0.596941	0.64306	0	0
BT1160-P4-F04	-0.516313	0.791566	0	0	0.0877313	0	0	0.965497	0.435226	0.405487	0	0
BT1160-P4-F05	0.822591	0.248614	0	0	0	0	0	0	0.155714	0.670584	0	0
BT1160-P4-F06	-0.336217	1.3728	0	0	0	0	0	0.185628	0.225946	0.604867	0	0
BT1160-P4-F07	0.765977	1.25057	0	0.0384437	0	0	0	0.435896	0.252455	0.572625	0	0
BT1160-P4-F08	0.937023	1.45372	0	0	0.0614326	0	0	0.78066	0.349482	0	0.697687	0
BT1160-P4-F09	-0.122744	1.09289	0	0	0	0	0	0.605318	0.411774	0.747968	0	0
BT1160-P4-F10	0.613192	1.252	0	0.0226679	0.107204	0	0	0.776958	0.550526	0.024694	0	0
BT1160-P4-F11	0.175366	0.088911	0	0	0.0752131	0	0	0.548632	0.37939	0.660631	0	0
BT1160-P4-F12	1.5113	1.68535	0	0	0.0978244	0	0	0.852761	0.521907	0.377305	0	0
BT1160-P4-G01	1.71554	1.91187	0	0	0	0	0	0.414039	0.61088	0	0	0
BT1160-P4-G03	2.07665	2.03494	0	0	0.141044	0	0	0	0.276695	0	0	0
BT1160-P4-G04	1.51719	1.54625	0	0	0.0863282	0	0	0	0.334676	0.282938	0	0
BT1160-P4-G05	0.249541	1.27405	0	0	0	0	0	0.110666	0.26109	0.572895	0	0
BT1160-P4-G06	1.15097	1.6213	0	0	0	0	0	0.243246	0.418424	0.344453	0	0
BT1160-P4-G07	1.1476	1.65285	0	0	0	0	0	0.772282	0.165878	0	0	0
BT1160-P4-G08	1.5847	1.16947	0	0	0.100472	0	0	0	0.0286265	0.641018	0.128894	0
BT1160-P4-G09	0.742494	1.48044	0	0	0.0667445	0	0	0.294846	0.266691	0.136035	0	0
BT1160-P4-G10	1.41672	1.43599	0	0.0969836	0.0251023	0	0	0.643636	0.271813	0.4224	0	0
BT1160-P4-G11	1.77523	1.47009	0	0	0	0	0	0	0.486785	0	0	0
BT1160-P4-G12	1.21679	1.39211	0	0	0.0958172	0	0	0	0.544367	0	0	0
BT1160-P4-H01	0.210236	0.553604	0	0	0.0655071	0	0	0.375692	0.0722279	0.344277	0.221415	0
BT1160-P4-H02	0.619051	1.55335	0	0	0	0	0	0.691053	0.287086	0	0	0
BT1160-P4-H03	-0.368666	0.589851	0	0	0.233722	0	0	0.640104	0.155018	0.659445	0	0
BT1160-P4-H04	0.109563	1.07753	0	0	0	0	0	0.178281	0.344873	0	0	0
BT1160-P4-H05	0.10052	1.31383	0	0	0.156235	0	0	0.226164	0.321466	0.0702321	0	0
BT1160-P4-H06	0.730486	1.44065	0	0	0.186057	0	0	0.51078	0.479268	0.576217	0.189772	0
BT1160-P4-H08	-0.255617	1.5208	0	0	0	0	0	0.56392	0.496298	0.615501	0	0
BT1160-P4-H09	-0.819194	1.7278	0	0	0	0	0	0.612807	0.11757	0.518751	0	0
BT1160-P4-H10	-0.477458	1.53939	0	0	0.0962204	0	0	0.569006	0.382573	0.571322	0	0
BT1160-P4-H11	0.748896	1.72043	0	0	0.176908	0	0	0.670397	0.49096	0.46429	0	0
BT1187-P1-B07	1.76412	-1.53874	0.535446	0.422257	0.0312119	0	0	0	0	0	0	0
BT1187-P3-A02	1.89926	-2.13354	0.0625496	0	0.620161	0	0	0	0	0	0	0
BT1187-P3-B05	1.77029	-1.9656	0.0999071	0.0186527	0.674629	0	0	0	0	0	0.0168874	0
BT1187-P4-A12	-1.99245	-2.15975	0	0	0.0267855	0	0	0	0.0559583	0	0	0
BT1187-P4-B11	0.217872	-1.01322	0	0	0.33219	0	0	0	0	0	0.43283	0
BT1187-P4-E11	1.60584	-1.77912	0	0.0429375	0.116185	0	0	0	0	0	0.0941143	0
BT1187-P4-E12	1.49331	-1.05901	0	0	0.0614326	0	0	0	0	0	0	0
BT1187-P4-H05	1.63295	1.02988	0.304546	0	0.150605	0	0	0	0.501352	0	0	0
BT749-P10-A01	1.58951	2.06094	0	0	0.0809165	0	0	0	0.815267	0.497366	0	0
BT749-P10-A02	2.29275	2.09468	0	0	0.0861889	0	0	0	0.753168	0	0	0
BT749-P10-A03	0.178905	1.4232	0	0	0.0994167	0	0	0.392266	0.599484	0	0.091879	0
BT749-P10-A04	-0.178434	1.47386	0	0	0.0777173	0	0	0.178705	0.558032	0.31241	0.145876	0
BT749-P10-A05	-0.540192	0.922445	0	0	0.379313	0	0	0.0420312	0.498124	0.163101	0.313749	0
BT749-P10-A06	-0.593303	1.59184	0	0	0.0619062	0	0	0.338745	0.517424	0.443374	0.617065	0
BT749-P10-A07	-0.671082	0.701129	0	0	0.0999445	0	0	0	0.408603	0	0.437034	0
BT749-P10-A08	-0.238732	0.924941	0	0.0199964	0.0478764	0	0	0.300667	0.515359	0.240121	0.45904	0
BT749-P10-A09	-0.780394	1.66222	0	0.0538747	0.0401452	0	0	0	0.465979	0.0304488	0.0233352	0
BT749-P10-A10	0.250612	1.31045	0	0	0.0637931	0	0	0.191138	0.656587	0.295344	0.571928	0
BT749-P10-A11	-0.222796	0.836296	0	0	0.051555	0	0	0.446295	0.616321	0.347704	0.385409	0
BT749-P10-A12	-1.14089	1.64332	0	0	0	0	0	0	0.370938	0.0880505	0	0
BT749-P10-B01	-1.13013	1.61338	0	0	0.0704158	0	0	0.158302	0.598709	0.0789506	0	0
BT749-P10-B02	-0.682533	1.58888	0	0	0.0584049	0	0	0.5039	0.637925	0.0513188	0.466203	0
BT749-P10-B03	0.665148	1.55497	0	0	0.03103	0	0	0.0914265	0.744704	0	0.427346	0
BT749-P10-B04	0.310365	0.713486	0.124548	0	0.0466917	0	0	0.122738	0.59231	0.357223	0.0606391	0
BT749-P10-B05	-0.383557	1.27796	0	0	0.0209281	0	0	0	0.522876	0.293584	0.261051	0
BT749-P10-B06	-0.556389	1.63349	0	0	0.0230248	0	0	0.309017	0.663237	0.0702321	0	0
BT749-P10-B07	-0.516722	1.57232	0	0	0.0235936	0	0	0.21277	0.568686	0.178113	0	0
BT749-P10-B08	0.079012	0.817503	0	0.0263662	0.161719	0	0	0.459096	0.585272	0.412811	0.41546	0
BT749-P10-B09	-0.58833	0.301898	0	0.0310513	0.103217	0.235805	0	0	0.488667	0	0	0
BT749-P10-B11	-0.000216141	1.0207	0.24847	0	0.0819238	0	0	0.364375	0.499435	0	0.105656	0
BT749-P10-B12	-0.691933	1.42049	0	0	0.0636362	0	0	0	0.436128	0	0	0
BT749-P10-C02	-0.52283	1.56491	0	0	0.071926	0	0	0.0750353	0.594511	0	0	0
BT749-P10-C03	-0.176418	0.692747	0	0	0.0366176	0	0	0.1662	0.57018	0	0	0
BT749-P10-C04	-0.119024	0.9044	0	0	0.018616	0	0	0.0376738	0.598629	0.561345	0.187903	0
BT749-P10-C05	-0.253301	1.07879	0	0	0.0448179	0.033144	0	0.386784	0.502584	0.242562	0.290791	0
BT749-P10-C06	-0.542552	0.850041	0	0	0.0843503	0	0	0.207161	0.577983	0.192127	0	0
BT749-P10-C07	-0.425313	1.00074	0	0	0.0905068	0	0	0.141291	0.656062	0	0	0
BT749-P10-C08	-0.340312	1.10579	0	0	0.0502237	0	0	0.309596	0.720693	0	0	0
BT749-P10-C09	0.0212007	1.17618	0	0	0.0525476	0	0	0.381542	0.618385	0.285849	0.33797	0
BT749-P10-C10	-0.691855	1.75191	0	0	0.0655071	0	0	0.30646	0.636294	0	0	0
BT749-P10-C12	-0.298112	0.835953	0.205542	0	0.0422345	0	0	0.388084	0.528785	0.260719	0.141525	0
BT749-P10-D01	-0.0450931	0.205772	0	0	0	0	0	0	0.647028	0	0.45456	0
BT749-P10-D02	0.667457	1.7177	0	0	0	0	0	0.421329	0.730742	0.379136	0	0
BT749-P10-D06	-0.616646	1.44509	0	0	0	0	0	0.20247	0.503861	0.293889	0.289614	0
BT749-P10-D07	-0.525557	1.31881	0	0	0.0585647	0	0	0.109239	0.533211	0.150694	0.486756	0
BT749-P10-D08	-0.506367	1.48025	0	0	0.0215029	0	0	0.0433551	0.610583	0.487424	0.18171	0
BT749-P10-D09	-0.6273	1.63181	0	0	0.0267855	0	0	0.05348	0.599028	0	0.0348835	0
BT749-P10-D11	-0.308244	0.961214	0	0.0268905	0.0411935	0	0	0.203219	0.525306	0	0	0
BT749-P10-D12	0.134632	1.37887	0	0	0.0830689	0	0	0.586866	0.752872	0.219287	0.306102	0
BT749-P10-E01	-0.492459	1.12909	0	0.0364222	0.123742	0	0	0	0.563085	0.338303	0.260186	0
BT749-P10-E02	-0.773879	1.15745	0	0	0.0645731	0	0	0.470541	0.564796	0.423092	0.145738	0
BT749-P10-E03	-0.414473	0.931657	0	0	0.0522162	0	0	0.357833	0.616047	0.337094	0.202298	0
BT749-P10-E04	0.906899	0.468244	0	0	0.0980913	0	0	0	0.658982	0.3572	0	0
BT749-P10-E07	0.572914	0.6499	0	0	0.0650408	0	0	0.209435	0.597819	0.397928	0.421152	0
BT749-P10-E08	-0.228294	1.14831	0	0	0.54005	0	0.0134655	0.435628	0.566199	0.189603	0	0
BT749-P10-E09	0.473231	1.27811	0	0.0250503	0.0510565	0	0	0.22502	0.649891	0.350838	0	0
BT749-P10-E10	-1.1072	1.18821	0	0	0.0837814	0	0	0	0.408865	0	0	0
BT749-P10-E11	-0.208178	0.655962	0	0	0.0224559	0	0	0.298321	0.51115	0.351037	0.0502448	0
BT749-P10-E12	-0.712116	1.01108	0	0	0.0836392	0	0	0.164392	0.44896	0.401801	0.24183	0
BT749-P10-F01	0.157809	0.839795	0	0	0.0477077	0	0	0.239813	0.489432	0.388632	0.267885	0
BT749-P10-F02	-0.483855	0.784113	0	0	0.0533701	0	0	0.217164	0.589994	0.395005	0.280289	0
BT749-P10-F03	0.617362	0.701461	0	0	0.0617493	0	0	0	0.733104	0	0.502881	0
BT749-P10-F04	-0.173427	0.208913	0	0	0.0141137	0	0	0.0768608	0.490504	0.147678	0.18171	0
BT749-P10-F06	-0.725458	1.30047	0	0	0.0893998	0	0	0.241127	0.493025	0.407928	0.0800298	0
BT749-P10-F07	0.0920172	1.30615	0	0	0.024161	0	0	0.433622	0.574629	0.221681	0.0673985	0
BT749-P10-F08	-0.186344	1.23965	0	0	0	0	0	0.16548	0.435842	0.387775	0	0
BT749-P10-F09	0.0715379	1.10328	0	0.0255767	0.0380354	0	0	0.108523	0.545975	0	0.593415	0
BT749-P10-F10	1.20511	1.57828	0	0	0.122087	0	0	0	0.79413	0	0	0
BT749-P10-F11	-0.19088	0.904232	0	0	0.0188095	0	0	0.142605	0.561785	0.219979	0.293421	0
BT749-P10-F12	0.217339	0.427223	0	0	0.0870305	0	0	0.208051	0.533017	0.314124	0	0
BT749-P10-G01	0.298841	1.53325	0	0	0	0	0	0.418602	0.686245	0.322974	0.112111	0
BT749-P10-G02	-0.138136	1.18422	0	0	0	0	0	0.135083	0.645465	0	0	0
BT749-P10-G03	-0.41617	1.44364	0	0	0	0	0	0.316152	0.620028	0.44436	0.201294	0
BT749-P10-G04	0.72587	1.09599	0	0	0.116795	0	0	0.382545	0.590176	0.379477	0	0
BT749-P10-G06	1.31621	1.56511	0	0	0.0545181	0	0	0	0.646412	0	0	0
BT749-P10-G07	-0.546732	1.2685	0	0	0.0766896	0	0	0.503419	0.645374	0.296729	0	0
BT749-P10-G08	1.91402	1.84798	0	0	0.0972907	0	0	0	0.729476	0.260637	0.626408	0
BT749-P10-G09	-0.238403	0.72857	0	0	0.0439602	0	0	0.3183	0.575519	0.304159	0.0205913	0
BT749-P10-G10	0.126949	0.727687	0	0	0.0867504	0	0	0.0850811	0.563074	0.305509	0.421896	0
BT749-P10-G11	-0.17683	1.10757	0	0	0.0596849	0	0	0	0.625081	0.417341	0	0
BT749-P10-G12	0.295973	0.88394	0	0	0	0	0	0.300384	0.681089	0.348138	0	0
BT749-P10-H01	-0.804385	1.44519	0	0	0.0917442	0	0	0.312521	0.599701	0.365662	0.0351015	0
BT749-P10-H02	-0.282561	0.344664	0	0	0.0788859	0	0	0.113839	0.520139	0.18715	0.101702	0
BT749-P10-H03	-0.0863844	0.611505	0.120903	0	0.0359051	0	0	0.299678	0.515565	0.110195	0.245688	0
BT749-P10-H04	-0.284186	1.06365	0	0	0.0637931	0	0	0	0.617302	0.248325	0.334268	0
BT749-P10-H07	-0.267885	1.24888	0	0	0.0408446	0	0	0.273779	0.594637	0.266424	0.418557	0
BT749-P10-H08	0.352929	1.37302	0	0	0.0861889	0	0	0.33801	0.718047	0	0.65947	0
BT749-P10-H09	-0.446754	1.03299	0	0	0	0	0	0	0.576705	0.33119	0.609349	0
BT749-P10-H10	-0.201013	1.27674	0	0	0.0617493	0	0	0.29267	0.606443	0.3493	0.302573	0
BT749-P10-H11	-0.459311	1.3293	0	0	0.0564696	0	0	0.395247	0.660785	0.286811	0.510199	0
BT749-P10-H12	-0.16343	1.302	0	0.0242589	0.0891227	0	0	0.256231	0.517983	0.483445	0.460546	0
BT749-P11-A01	0.834971	0.754039	0	0	0	0	0	0	0.817697	0	0.267383	0
BT749-P11-A02	0.329541	1.15472	0	0.0178429	0.0617493	0	0	0	0.869061	0	0	0
BT749-P11-A03	-0.102744	1.25617	0	0	0.020544	0	0	0	0.765271	0	0	0
BT749-P11-A04	-0.271513	1.29318	0	0.0162164	0.0528775	0	0.00664707	0	0.824974	0	0.091014	0
BT749-P11-A05	1.14567	1.3724	0	0.0134849	0.0695039	0	0	0	0.945487	0	0	0
BT749-P11-A07	-0.175816	1.0858	0	0	0.0411935	0	0	0.344439	0.888202	0.538364	0	0
BT749-P11-A08	1.44149	1.8184	0	0	0.0378595	0	0	0	0.81262	0	0	0
BT749-P11-A09	-0.228121	1.38622	0	0	0.0690464	0	0	0	0.871639	0	0	0
BT749-P11-A11	0.169195	1.0098	0	0	0.163097	0	0	0	0.686336	0	0	0
BT749-P11-A12	0.388483	0.940704	0	0	0.0350107	0	0	0	0.803256	0	0	0
BT749-P11-B09	0.538311	0.999991	0	0	0.0498909	0	0	0	0.901263	0	0	0
BT749-P11-B10	0.165769	1.18963	0	0.0221356	0.050058	0	0	0.752388	0.76875	0	0	0
BT749-P11-B11	-0.0660479	0.195755	0	0.0164882	0.0396203	0	0	0.362157	0.931057	0	0	0
BT749-P11-C05	0.472091	0.906539	0	0	0.0376821	0	0	0	0.86378	0	0	0
BT749-P11-C07	-0.251797	0.648099	0	0	0.0387421	0	0	0.422488	0.773472	0	0	0
BT749-P11-D09	0.654121	0.665287	0	0	0.0523819	0	0	0	0.753396	0	0	0
BT749-P11-D11	1.28184	-0.111968	0	0.0156722	0.0714744	0	0	0	0.908563	0	0	0
BT749-P11-E04	-0.362345	1.1257	0	0.00738272	0.0420615	0	0	0.347236	0.748822	0	0	0
BT749-P11-E06	-0.268554	0.410125	0	0	0.0667445	0	0	0.272508	0.69229	0	0.418453	0
BT749-P11-E12	0.493315	1.05775	0	0	0.0125248	0	0	0	0.683906	0	0	0
BT749-P11-F04	0.61498	1.24105	0	0	0.0237828	0	0	0	0.816305	0	0	0
BT749-P11-F05	-0.47956	0.800775	0	0	0.0741721	0	0	0	0.660146	0	0	0
BT749-P11-F06	0.307604	0.774558	0	0	0.0448179	0	0	0.682081	0.694035	0	0	0
BT749-P11-F08	-0.463729	1.08783	0	0	0.0084994	0	0	0	0.618557	0.340075	0	0
BT749-P11-H06	-0.428644	1.19876	0	0	0.0470304	0	0	0	0.855647	0	0	0
BT749-P11-H09	0.576088	0.315506	0	0	0.0164754	0	0	0	0.757891	0	0.352364	0
BT749-P7-A01	-0.547084	1.45937	0	0	0	0	0	0.453642	0.579682	0.558165	0.451584	0
BT749-P7-A02	0.401122	1.00388	0	0	0	0	0	0.271052	0.684887	0	0.456411	0
BT749-P7-A03	0.150303	1.32501	0	0.0302757	0.0735754	0	0	0.498658	0.515279	0.346847	0.151925	0
BT749-P7-A05	-0.0124172	1.33654	0	0	0.0174504	0	0	0.0640217	0.603032	0.0290286	0.436809	0
BT749-P7-A06	1.72644	1.87237	0	0.018113	0.0362613	0	0	0.333178	0.656678	0	0	0
BT749-P7-A07	-0.592365	1.23378	0	0	0.0956823	0	0.0246148	0.301458	0.475299	0	0	0
BT749-P7-A08	-0.610381	0.731511	0.279848	0	0.0747674	0	0	0.377458	0.485359	0.379477	0.218301	0
BT749-P7-A10	1.16813	0.606937	0	0	0.039094	0	0	0.158571	0.472048	0.448151	0	0
BT749-P7-A11	-0.46803	1.25262	0	0	0.0541912	0	0	0.286072	0.658321	0	0.10418	0
BT749-P7-A12	-0.447659	0.853429	0	0	0.0541912	0	0	0.392718	0.539644	0.346918	0.119486	0
BT749-P7-C01	-0.295049	1.5128	0	0	0.119578	0	0	0.338872	0.578462	0	0	0
BT749-P7-C03	-0.184091	1.14546	0	0	0.0607992	0	0	0.377487	0.657853	0	0.160861	0
BT749-P7-C04	0.20651	1.36118	0	0	0.0747674	0	0	0	0.6704	0.483375	0.0278403	0
BT749-P7-C05	0.196397	0.990012	0	0	0.0551706	0	0	0.501031	0.544161	0.363021	0	0
BT749-P7-C08	-0.432154	0.962478	0	0	0.0830689	0	0	0.302744	0.565196	0.482589	0	0
BT749-P7-C09	0.0296081	1.17191	0	0	0.0620645	0	0	0.164943	0.564329	0.389172	0.368437	0
BT749-P7-C10	1.44201	-0.536844	0.365267	0	0.0228356	0	0	0.330211	0.681682	0.0551521	0.0805713	0
BT749-P7-C11	-0.278625	1.57482	0	0	0.0800486	0	0	0	0.4895	0.324018	0	0
BT749-P7-D01	-0.275304	1.12179	0	0	0.0355473	0	0	0.399118	0.550732	0	0.545406	0
BT749-P7-D03	0.0970736	1.16484	0	0	0	0	0	0.421598	0.556766	0.283419	0.171757	0
BT749-P7-D04	-0.104388	1.35815	0	0	0	0	0	0.245394	0.6481	0.295426	0.254027	0
BT749-P7-D05	-0.10201	0.183502	0.163191	0	0.0364388	0	0	0.386233	0.505321	0.279264	0	0
BT749-P7-D06	-0.35636	0.941183	0	0	0.250349	0	0	0.299212	0.674347	0.45314	0.152331	0
BT749-P7-D07	-0.00690513	0.604353	0	0	0.0766896	0	0	0.49059	0.551177	0.278196	0.296483	0
BT749-P7-D08	-0.373464	1.50034	0	0	0.144063	0	0	0	0.688891	0.35227	0	0
BT749-P7-D09	1.69059	-0.563668	0	0	0.0432726	0	0	0	0.293406	0.318514	0.194287	0
BT749-P7-D10	0.213353	0.594424	0	0.0614067	0.113234	0	0	0.0782539	0.542291	0.286248	0.504213	0
BT749-P7-D11	-0.194613	1.26542	0	0	0.0498909	0	0	0.480078	0.587541	0.380768	0.295254	0
BT749-P7-D12	0.237357	0.622393	0	0	0.060481	0	0	0.29315	0.380976	0.359324	0	0
BT749-P7-E01	0.445953	0.901707	0	0	0.0614326	0	0	0.379535	0.523036	0.452917	0.182921	0
BT749-P7-E02	0.645082	0.740768	0	0	0	0	0	0	0.676617	0.479971	0	0
BT749-P7-E03	-0.154916	1.28087	0	0	0.0439602	0	0	0	0.616013	0	0.250307	0
BT749-P7-E04	-0.0993782	1.37693	0	0	0.0653517	0	0	0	0.603591	0	0.572845	0
BT749-P7-E05	0.0755372	0.960316	0.0432233	0	0.0145089	0	0	0.588702	0.582089	0.295462	0.20318	0
BT749-P7-E06	-0.721788	0.861842	0	0	0.0598447	0	0	0.410747	0.45942	0.146469	0.304856	0
BT749-P7-E07	0.103774	0.915438	0	0	0.0328481	0	0	0.424353	0.590815	0.46348	0.161907	0
BT749-P7-E09	-0.816369	1.53334	0	0	0.0453311	0	0	0.250226	0.577663	0.441508	0.16771	0.262945
BT749-P7-E10	-0.0686883	0.96699	0	0	0.0628518	0	0	0.34872	0.566336	0	0.149193	0
BT749-P7-E12	-0.269995	1.03385	0	0	0.0427536	0	0	0.383788	0.561089	0.160096	0.208872	0
BT749-P7-F02	-0.449463	1.46795	0	0	0.0648854	0	0	0.35642	0.55007	0.172526	0.377295	0
BT749-P7-F03	-0.53118	0.977448	0	0	0.0676682	0	0	0.439612	0.578644	0	0.29195	0
BT749-P7-F04	-0.744649	1.67365	0	0	0	0	0	0.253843	0.443017	0.190871	0.263508	0
BT749-P7-F07	-0.589077	1.26719	0	0.0297574	0.0810602	0	0	0	0.611929	0.405886	0.0246951	0
BT749-P7-F08	-0.149773	0.85863	0	0	0.0129231	0	0	0.380327	0.489865	0.335192	0.0750904	0
BT749-P7-F09	0.140136	0.993181	0	0	0.0513893	0	0	0.190418	0.562675	0.184955	0.28432	0
BT749-P7-F11	-0.647419	1.12052	0	0	0.0847755	0	0	0.407483	0.641142	0.232057	0.0231069	0
BT749-P7-G01	0.21227	0.468519	0	0	0.0916064	0	0	0.326961	0.646811	0.330321	0.117467	0
BT749-P7-G02	-0.309586	1.13959	0	0	0	0	0	0.308664	0.583161	0.436285	0.348368	0
BT749-P7-G04	-0.544591	0.502146	0	0.0205327	0.0609575	0	0	0.342545	0.452405	0.102238	0	0
BT749-P7-G05	-0.110067	0.142453	0	0	0.0191966	0	0	0.405604	0.476804	0	0.110673	0
BT749-P7-G08	-0.842943	0.818458	0	0	0.0927016	0	0	0.354244	0.535812	0.213242	0.179409	0
BT749-P7-G09	0.501418	1.24375	0	0	0.0852007	0	0	0.296894	0.594522	0	0	0
BT749-P7-G11	-0.533037	1.29951	0	0	0.0411935	0	0	0.120267	0.54423	0	0.25285	0
BT749-P7-G12	-0.653784	1.36547	0	0.00257701	0.0918806	0	0	0.163389	0.502686	0	0.365513	0
BT749-P7-H01	2.03521	-0.823518	0	0	0	0	0	0.346374	0.317793	0	0	0
BT749-P7-H02	-0.276758	1.41343	0	0.141408	0	0	0	0.380228	0.547127	0.35011	0	0
BT749-P7-H03	-0.319462	0.749686	0.246687	0	0.10784	0	0	0.12976	0.518793	0.341953	0.380634	0
BT749-P7-H05	0.535033	0.920792	0	0	0.0105217	0	0	0	0.459443	0.426461	0.226397	0
BT749-P7-H06	-0.650942	1.35338	0	0.0318248	0.0623797	0	0	0.348564	0.44385	0	0.369129	0
BT749-P7-H07	-0.159868	1.04307	0	0	0.0392699	0	0	0	0.500565	0.167115	0.470736	0
BT749-P7-H08	-0.750477	0.649977	0.0878106	0	0.0870305	0	0	0.448514	0.434314	0.297105	0	0
BT749-P7-H09	-0.542808	1.34713	0	0	0.0637931	0	0	0.268721	0.49761	0.275051	0.302573	0
BT749-P7-H11	-0.612764	1.4257	0	0	0.0168654	0	0	0.304227	0.553629	0.0286001	0.123778	0
BT749-P7-H12	-0.39073	1.05134	0	0	0.0460129	0	0	0.466585	0.498329	0.203242	0	0
BT749-P8-A01	-0.368451	0.62708	0	0	0.0614326	0	0	0.331143	0.653838	0	0.530129	0
BT749-P8-A02	-0.389343	1.61002	0	0.0703284	0.16707	0	0	0.0853496	0.553025	0.406132	0	0
BT749-P8-A03	-0.606169	1.05219	0	0	0	0	0	0	0.474124	0	0	0
BT749-P8-A04	-0.875682	1.59918	0	0	0.0396203	0	0	0.386529	0.470394	0.564597	0	0
BT749-P8-A06	-0.170268	1.146	0	0	0.0182289	0	0	0.326679	0.507067	0	0.429335	0
BT749-P8-A08	-0.438191	0.746733	0	0	0.0228356	0	0	0.525517	0.415972	0.223325	0.0201311	0
BT749-P8-A09	0.0717569	1.3322	0	0	0.0282722	0	0	0.474116	0.514344	0.447623	0	0
BT749-P8-A10	-0.507445	1.27891	0	0.0170308	0.0304802	0	0	0.430386	0.526789	0.471286	0	0
BT749-P8-A11	0.0144632	1.31637	0	0	0.109359	0	0	0.496609	0.566998	0.352962	0.142091	0
BT749-P8-A12	-0.938417	1.07687	0.314299	0	0.0576015	0	0	0.360066	0.542416	0.315309	0.0208214	0
BT749-P8-B01	0.0834624	0.951714	0	0	0	0	0	0.345668	0.621944	0.303631	0.449992	0
BT749-P8-B02	0.464889	1.01858	0	0	0	0	0	0.437945	0.787685	0.157373	0.392087	0
BT749-P8-B04	-0.582098	1.3891	0	0	0	0	0	0.322327	0.593804	0.454971	0.672064	0
BT749-P8-B05	-0.763897	1.53357	0	0	0.110115	0	0	0.468718	0.602713	0.303713	0.0357502	0
BT749-P8-B06	-0.570887	0.916237	0	0	0.0286417	0	0	0.252543	0.581393	0.269182	0.549887	0
BT749-P8-B07	-0.230756	0.754253	0	0	0.107967	0	0	0.208347	0.476268	0.321354	0	0
BT749-P8-B08	-0.253352	0.296378	0	0	0.0803374	0	0	0.343492	0.541059	0.0249862	0	0
BT749-P8-B09	0.265276	0.882951	0	0.0694252	0	0	0	0.311603	0.694149	0	0	0
BT749-P8-B11	-0.757288	1.37646	0	0.0205327	0.0366176	0	0	0.422799	0.555135	0.394911	0.2824	0
BT749-P8-C02	0.290307	1.28139	0	0	0	0	0	0.288897	0.574458	0.296107	0.303022	0
BT749-P8-C04	-0.850814	1.4784	0	0	0.0983566	0	0	0.460424	0.363934	0.338479	0.140959	0
BT749-P8-C05	-0.523355	1.50494	0	0	0.10139	0	0	0.33979	0.537352	0.354195	0.441619	0
BT749-P8-C06	-0.716922	1.42869	0	0	0.0199678	0	0	0.477662	0.557838	0.398749	0.156899	0
BT749-P8-C08	1.38128	-0.495005	0	0	0.0176454	0.0425719	0	0	0.61607	0.125236	0.128596	0
BT749-P8-C10	-0.402451	1.12577	0	0	0.0518863	0	0	0.278145	0.521667	0	0.419249	0
BT749-P8-C12	-0.169982	0.728643	0	0	0.0916064	0	0	0.466217	0.753875	0	0.197592	0
BT749-P8-D01	-0.409809	0.978066	0	0	0.0264131	0	0	0.278626	0.521701	0.219886	0.321863	0
BT749-P8-D02	0.57979	1.36002	0	0	0	0	0	0	0.69837	0.739083	0	0
BT749-P8-D03	-0.546156	0.089301	0	0	0.0517207	0	0	0.315714	0.492717	0.358291	0.149878	0
BT749-P8-D07	-0.00132835	0.953336	0	0	0.0487179	0	0	0.305188	0.567431	0.370287	0.113697	0
BT749-P8-D08	0.258095	1.48233	0	0.0331087	0.0209281	0	0	0.0423632	0.621431	0.0356038	0	0
BT749-P8-D11	0.237198	1.20072	0	0	0.0207361	0	0	0	0.710917	0.0353291	0.203958	0
BT749-P8-D12	0.836875	1.58473	0	0	0.133304	0	0	0	0.519762	0.583576	0	0
BT749-P8-E02	-0.455406	1.59953	0	0	0	0	0	0.532765	0.5598	0.532589	0.139536	0
BT749-P8-E03	-0.814491	1.28849	0	0	0.046353	0	0	0	0.501454	0.510464	0	0
BT749-P8-E04	0.0650592	0.269151	0	0	0.0585647	0	0	0.4291	0.496675	0.442506	0.0157182	0
BT749-P8-E05	-0.551693	0.885823	0	0	0	0	0.0371028	0.350006	0.626188	0.402083	0	0
BT749-P8-E06	1.0901	1.54977	0	0	0	0	0	0	0.631606	0	0	0
BT749-P8-E07	-0.531233	0.972951	0	0	0.0199678	0	0	0	0.553561	0.19843	0.644124	0
BT749-P8-E08	-0.171436	0.88996	0.385418	0	0.0441318	0	0	0.213914	0.627408	0.024694	0.0187471	0
BT749-P8-E09	-0.520933	1.28972	0	0	0	0	0	0.340101	0.588066	0.165213	0.395287	0.556469
BT749-P8-E10	-0.101502	1.4827	0	0	0.0647285	0	0	0.232522	0.608735	0.306812	0.180741	0
BT749-P8-E11	-0.829869	1.41415	0	0	0.0995486	0	0	0.430019	0.549443	0.282879	0	0
BT749-P8-E12	-0.0648034	0.962199	0	0	0.0561456	0	0	0.208418	0.670754	0.470957	0.158624	0
BT749-P8-F02	-0.0629512	1.1096	0	0	0.0655071	0	0	0.0482395	0.565458	0	0.487794	0
BT749-P8-F03	0.148167	0.700504	0	0	0.068435	0	0	0.475698	0.527736	0.506133	0.289614	0
BT749-P8-F04	1.29266	-0.349736	0	0	0.0595251	0	0	0.189937	0.544652	0.375909	0.436255	0
BT749-P8-F05	-0.508262	1.15056	0	0	0.0288264	0	0	0.439556	0.535173	0.27086	0.0704278	0
BT749-P8-F06	0.0806904	1.52649	0	0	0.116917	0	0	0.389934	0.596473	0.318725	0	0
BT749-P8-F08	-0.545706	1.07852	0	0	0.0722265	0	0	0.536057	0.55558	0.33018	0	0
BT749-P8-F09	-0.283809	1.766	0	0	0.0507237	0	0	0.0498418	0.455588	0	0	0
BT749-P8-F10	-0.571553	1.47692	0	0	0.0265993	0	0	0.219552	0.542154	0	0.105002	0
BT749-P8-F11	-0.303322	0.698936	0	0	0.0371498	0	0	0	0.563872	0	0.46968	0
BT749-P8-G02	0.103074	1.18133	0	0	0.122087	0	0	0.0876173	0.574093	0.411015	0.463591	0
BT749-P8-G03	0.803832	1.19435	0	0	0	0	0	0.404982	0.609705	0.57205	0.437847	0
BT749-P8-G04	-0.0696771	0.59468	0	0	0.0541912	0	0	0.205465	0.617347	0.311283	0.283282	0
BT749-P8-G05	-0.677662	1.57923	0	0	0.0813476	0	0	0	0.634994	0	0.0473712	0
BT749-P8-G07	-0.289612	1.01575	0	0	0.0788859	0	0	0.397635	0.598127	0.321025	0.0264978	0
BT749-P8-G08	-0.357645	0.825546	0.271498	0	0.0623797	0	0	0.146024	0.549431	0.394465	0.0942856	0
BT749-P8-G09	-0.368939	0.969911	0	0	0.0342923	0	0	0.246312	0.635792	0.291635	0.389492	0
BT749-P8-G10	-0.511808	1.52122	0	0	0.0558215	0	0	0.122067	0.566165	0	0.0465442	0
BT749-P8-G11	-0.326361	0.721589	0	0	0.030297	0	0	0.443837	0.550401	0.383162	0.499836	0
BT749-P8-G12	0.00704145	1.5983	0	0	0.194238	0	0	0	0.569542	0.408257	0.313541	0
BT749-P8-H01	-0.365279	0.765717	0	0	0	0	0	0.473197	0.559435	0.298419	0.436861	0
BT749-P8-H02	-0.469178	0.893855	0	0	0.0569564	0	0	0.51615	0.605359	0	0.554904	0
BT749-P8-H04	-0.2659	0.971436	0	0	0.0188095	0	0	0.176063	0.530314	0.260719	0.441844	0
BT749-P8-H05	-0.383311	1.37011	0	0.0281963	0.0639485	0	0	0.233624	0.622024	0.233172	0.376239	0
BT749-P8-H06	0.454745	1.46152	0	0	0.0731268	0	0	0	0.547093	0.339664	0	0
BT749-P8-H07	-0.293497	1.3034	0	0	0	0	0	0.376526	0.486991	0.375909	0	0
BT749-P8-H08	0.175418	0.997689	0	0	0.0902311	0.0280537	0	0.446055	0.537409	0.396789	0.573537	0
BT749-P8-H09	0.00895093	0.449389	0	0.0208019	0.0556588	0	0	0.430513	0.657545	0	0	0
BT749-P8-H10	1.37404	-0.368701	0.224838	0	0.136767	0	0	0.189697	0.733184	0.318408	0.090841	0
BT749-P8-H11	-1.17419	1.52128	0	0.0541139	0.0636362	0	0	0.498177	0.588363	0.0984931	0.416256	0
BT749-P9-A01	-0.0539775	0.969604	0	0	0.0913322	0	0	0.255708	0.430983	0.308678	0.0629764	0
BT749-P9-A03	-0.0445893	0.791478	0	0.0191914	0.0125248	0	0	0.400743	0.625001	0.340803	0	0
BT749-P9-A05	0.0755184	1.13068	0	0	0.0728277	0	0	0.250466	0.646982	0.12668	0.403003	0
BT749-P9-A08	-0.20037	0.960065	0	0	0.0893998	0	0	0.544054	0.56515	0.426121	0.115747	0
BT749-P9-A10	-0.135164	0.53407	0	0	0.0580838	0	0	0.405519	0.499105	0	0.115275	0
BT749-P9-B01	0.440773	1.38407	0	0	0.0380354	0	0	0.1277	0.655925	0.685173	0.439352	0
BT749-P9-B02	-0.214179	1.44757	0	0	0.0603227	0	0	0.28682	0.690511	0.303267	0.587256	0
BT749-P9-B03	-0.724412	1.32239	0	0	0.0617493	0	0	0.286114	0.515758	0	0.491895	0
BT749-P9-B04	-0.1715	0.541791	0	0	0.0353685	0	0	0.334534	0.560348	0.426531	0.0316067	0
BT749-P9-B05	-0.322307	1.30384	0	0	0.0197757	0	0	0.432873	0.664115	0	0	0
BT749-P9-B07	-0.205898	1.30088	0	0.0271517	0.0366176	0	0	0.510865	0.573192	0	0.15206	0
BT749-P9-B11	-0.509185	1.44792	0	0	0.0793228	0	0	0.343492	0.523983	0.425076	0.0152492	0
BT749-P9-B12	-0.239085	1.2218	0.0345354	0.034899	0.0598447	0	0	0.376371	0.559686	0.203852	0.500407	0
BT749-P9-C01	1.22799	1.64192	0	0.0250503	0.0439602	0	0	0	0.726499	0	0.463366	0
BT749-P9-C02	-0.564412	1.06975	0	0	0.051555	0	0	0.421075	0.508219	0	0.188249	0
BT749-P9-C03	-0.0895888	0.646012	0	0	0.0490537	0	0	0.497499	0.516842	0.355322	0.166303	0
BT749-P9-C04	-0.41264	1.2212	0	0	0.0695039	0	0	0	0.343151	0	0	0
BT749-P9-C05	-0.107169	1.35038	0	0	0.0561456	0	0	0.510244	0.435911	0.315755	0.225186	0
BT749-P9-C06	-0.413174	0.823642	0	0.0338783	0.0213108	0	0	0.393311	0.636431	0	0	0
BT749-P9-C07	0.0837677	0.901994	0	0	0.0922911	0	0	0.351348	0.656313	0	0.106797	0
BT749-P9-C08	0.126421	1.3917	0	0.0341335	0.0833548	0	0	0.309653	0.458154	0.45821	0.151788	0
BT749-P9-C09	-0.381833	1.23949	0	0	0.079031	0	0	0.255708	0.491998	0.256635	0.667238	0
BT749-P9-C11	0.477725	1.40047	0	0	0.0746193	0	0	0.212049	0.692438	0.354289	0.246985	0
BT749-P9-C12	1.8456	-0.536694	0	0	0.0360825	0	0	0	0.532036	0.538399	0	0
BT749-P9-D01	-0.239961	0.896002	0	0	0.0366176	0	0	0.273355	0.563496	0.250379	0.477794	0
BT749-P9-D03	0.484103	0.75208	0	0	0.0475377	0	0	0.29185	0.688332	0.437964	0	0
BT749-P9-D04	0.0772329	1.12447	0	0	0.0339316	0	0	0.507135	0.498317	0	0.301829	0
BT749-P9-D05	-0.585739	1.33341	0	0	0.0193901	0	0	0.232127	0.53726	0.235167	0.0481964	0
BT749-P9-D07	-0.14701	1.17929	0	0	0.060481	0	0	0	0.671062	0	0	0
BT749-P9-D08	-0.504088	0.793828	0	0	0.0612742	0	0	0.269696	0.410052	0.225566	0.451999	0
BT749-P9-D09	-0.459301	0.691118	0	0	0.0397963	0	0	0.269484	0.528192	0.312739	0.250584	0
BT749-P9-D10	-0.476718	1.10134	0.334478	0	0.110115	0	0	0.0261713	0.537352	0	0.109709	0
BT749-P9-D11	-0.361641	1.24706	0	0	0.0195822	0	0	0.321437	0.512086	0.0331155	0.107448	0
BT749-P9-D12	-0.620044	1.00783	0.210258	0.0287187	0.0588858	0	0	0.0951679	0.541949	0.266107	0.13215	0
BT749-P9-E01	0.0957556	0.476855	0	0	0.0527118	0	0	0.197426	0.619595	0.396155	0.0494282	0
BT749-P9-E02	-0.496184	1.14178	0	0	0	0	0	0.554821	0.662404	0.0994379	0.319302	0
BT749-P9-E04	1.13133	1.44749	0	0	0.015691	0	0	0.266799	0.668279	0.355944	0.102695	0
BT749-P9-E06	-0.0283633	0.204552	0	0	0.041541	0	0	0.448132	0.630431	0	0.156632	0
BT749-P9-E07	-0.574873	0.680659	0	0	0.0672064	0	0	0.0818328	0.578393	0	0.0552966	0
BT749-P9-E09	-0.141598	1.09886	0	0	0.079468	0	0	0.286467	0.684054	0.335004	0	0
BT749-P9-E10	-0.536772	1.2707	0	0	0.0382128	0	0	0.128244	0.606716	0	0.496133	0
BT749-P9-F01	-0.589041	1.26606	0	0	0.0387421	0	0	0.185303	0.645979	0.0795867	0.473123	0
BT749-P9-F03	-0.590686	0.672262	0	0.0239937	0.0585647	0	0	0.339409	0.554222	0.212327	0.114014	0
BT749-P9-F04	-0.366061	1.45395	0	0	0.0475377	0	0	0.642379	0.546796	0.0520676	0	0
BT749-P9-F05	0.00153141	0.607004	0	0	0.122324	0	0	0.456751	0.562298	0	0	0
BT749-P9-F06	0.0475588	1.13421	0	0	0.0234045	0	0	0.444204	0.495705	0.346976	0	0
BT749-P9-F07	1.06379	-0.244106	0	0	0.00335753	0	0	0.130621	0.316972	0.391672	0.129043	0
BT749-P9-F08	-0.21919	1.26427	0	0	0.0470304	0	0	0	0.555226	0.110901	0.441705	0
BT749-P9-F09	-0.725627	1.15373	0	0	0.0312119	0	0	0.374067	0.400116	0	0.057089	0
BT749-P9-F11	0.18005	0.635648	0	0	0.0355473	0	0	0.404092	0.55007	0.297727	0	0
BT749-P9-G01	0.0453326	1.28349	0	0	0.0658164	0	0	0.316364	0.738442	0	0	0
BT749-P9-G03	1.5308	1.7393	0	0	0.09147	0	0	0	0.726796	0	0	0
BT749-P9-G05	-0.241515	0.506795	0	0	0.0291944	0	0	0.372867	0.545621	0.242081	0.329441	0
BT749-P9-G06	-0.456802	1.4738	0	0	0.0659718	0	0	0.030605	0.544116	0.408409	0	0
BT749-P9-G07	0.276196	0.694042	0	0.0221356	0.0868912	0	0	0.548887	0.595618	0.495194	0.403349	0
BT749-P9-G08	-0.403176	0.544815	0	0	0.0131219	0	0	0.332867	0.536279	0	0	0
BT749-P9-G09	0.416762	1.36124	0	0	0.0408446	0	0	0.226376	0.486956	0	0.0791215	0
BT749-P9-G10	0.0937437	0.176728	0	0	0.0256653	0	0	0.130406	0.564602	0.22708	0	0
BT749-P9-G11	0.353067	1.22987	0	0	0.0422345	0	0	0.587572	0.63261	0	0	0
BT749-P9-G12	0.0603239	1.18123	0	0	0	0	0	0.467192	0.609819	0.234827	0.227003	0
BT749-P9-H02	0.426663	0.968243	0	0	0.0293791	0	0	0.095295	0.527667	0	0.365167	0
BT749-P9-H03	-0.0341545	1.1219	0	0	0.0297471	0	0	0.551133	0.590599	0.274722	0	0
BT749-P9-H04	-0.64488	1.60554	0	0	0.0512236	0	0	0.425116	0.577538	0.400087	0.402052	0
BT749-P9-H06	-0.783923	0.890658	0	0.0231982	0	0	0	0.507983	0.627431	0	0.477794	0
BT749-P9-H07	-0.477303	1.51853	0	0.0143071	0.0546809	0	0	0.505524	0.460801	0.377763	0.446307	0
BT749-P9-H08	-0.477592	1.248	0	0	0.0893998	0	0	0.396829	0.48504	0	0.38854	0
BT749-P9-H09	-0.220239	1.21943	0	0	0.0335709	0	0	0.490251	0.514846	0	0.273455	0
BT749-P9-H10	-0.734782	1.35056	0.13196	0	0.0728277	0	0	0.323824	0.457778	0	0	0
BT749-P9-H11	-0.102316	0.842823	0	0	0.0293791	0	0	0	0.584074	0	0.183993	0
BT771-P10-A02	2.11868	-1.87218	0	0	0.0335709	0	0.165167	0	0.263201	0	0.137385	0
BT771-P10-A06	2.05908	-2.22048	0.150589	0	0.781484	0	0.102319	0	0	0	0.323576	0
BT771-P10-A08	0.90184	0.900113	0	0	0.0708689	0	0	0.436137	0.508036	0.59874	0	0
BT771-P10-A11	0.531377	1.05594	0	0	0.0620645	0	0	0.215907	0.512713	0.279112	0	0
BT771-P10-A12	0.319062	-0.457276	0.344021	0	0.0498909	0	0	0	0.514378	0.101216	0.0374751	0
BT771-P10-B01	2.17895	-2.52463	0	0	0	0	0	0	0	0	0.0976834	0
BT771-P10-B03	2.22687	-2.15816	0	0	0	0	0.500232	0	0	0	0.0739797	0
BT771-P10-B04	0.487412	-0.465126	0.182893	0	0.0129231	0	0	0	0.0587462	0.30761	0	0
BT771-P10-B06	2.62336	-2.51663	0	0	0.456639	0	0	0	0.564739	0	0	0
BT771-P10-B07	2.0311	-2.37067	0.0265267	0	0.0084994	0	0	0	0	0	0.150016	0
BT771-P10-B08	0.145703	1.32904	0.251599	0	0.0939259	0.105159	0	0.175031	0.529059	0.284969	0.579886	0
BT771-P10-B10	2.30661	-2.07621	0	0	0.0600045	0.602465	0	0	0.342466	0	0	0
BT771-P10-B12	1.96511	-1.72836	0	0	0.0197757	0	0	0	0.375078	0	0	0
BT771-P10-C04	2.34015	1.57739	0	0.0194603	0.0933819	0	0	0	0.734393	0	0.136377	0
BT771-P10-C05	1.94708	-1.3891	0	0	0.0623797	0	0	0	0.395474	0	0.29778	0
BT771-P10-C06	1.09788	1.49497	0	0	0.0651962	0	0	0.360588	0.549808	0.33045	0	0
BT771-P10-C09	1.59943	-2.3491	0	0	0.51835	0	0	0	0.112331	0	0.192903	0
BT771-P10-C12	0.721075	-1.23392	0.321989	0	0.0633225	0	0.229277	0	0.152041	0.0768132	0	0
BT771-P10-D02	2.21709	-2.29748	0	0	0.18028	0	0.14832	0	0.0889605	0	0.198042	0
BT771-P10-D04	2.05182	-2.08653	0	0	0.0389181	0	0.201053	0	0.218349	0	0.0180516	0
BT771-P10-D07	0.211473	-0.976114	0	0.00428238	0.0404957	0	0	0	0.181448	0	0.477794	0
BT771-P10-D08	1.07233	-0.772499	0.0797808	0	0.0522162	0	0.00945395	0	0.469835	0.702932	0.146849	0
BT771-P10-D09	0.660164	-1.09946	0	0	0.0711724	0	0	0	0.352584	0	0	0
BT771-P10-D12	0.901399	1.1269	0	0	0.0518863	0	0	0.346827	0.499903	0.397188	0.0598536	0
BT771-P10-E03	0.96938	0.891245	0	0.0545884	0.0348304	0.415479	0	0.0943992	0.323326	0.132889	0	0
BT771-P10-E04	1.64262	-0.975173	0.0871538	0	0.058726	0	0	0	0.38223	0	0	0
BT771-P10-E05	-0.502081	1.18265	0	0	0.162305	0.155087	0	0.38205	0.471432	0	0.211346	0
BT771-P10-E06	1.2389	-1.25256	0	0	0.0960855	0	0.0149952	0	0.367002	0.410346	0	0
BT771-P10-E09	2.3965	-2.53332	0	0.184916	0.0707178	0	0.545879	0	0	0	0.355028	0
BT771-P10-E11	0.712852	1.74186	0	0	0	0	0	0.410422	0.412436	0.0872429	0.203284	0
BT771-P10-E12	1.97089	-1.51176	0	0	0.0403212	0.296751	0	0	0	0	0.0623951	0
BT771-P10-F08	1.81568	-1.90347	0	0	0.147468	0	0.365464	0	0	0	0	0
BT771-P10-F09	-0.687242	1.03885	0	0.0279352	0.111492	0	0	0.469764	0.478504	0.434689	0	0
BT771-P10-G05	1.84008	-0.812494	0.159261	0	0.0523819	0	0	0	0.435763	0	0	0
BT771-P10-G07	1.96459	-1.40975	0	0.0471182	0.0793228	0	0.639279	0	0.0736012	0	0	0
BT771-P10-G08	2.4405	-2.48225	0.454517	0.01045	0.137542	0	0.120161	0	0.00406356	0	0	0
BT771-P10-G09	1.06523	1.48058	0	0	0.0647285	0.0743912	0	0.325817	0.441112	0.322974	0.0124155	0
BT771-P10-G10	0.934773	0.217205	0	0	0.102175	0	0	0.174862	0.427036	0.40017	0.279961	0
BT771-P10-G12	1.46487	-2.2868	0	0	0.265832	0	0	0	0	0	0.0102689	0
BT771-P10-H02	1.49087	1.32062	0	0	0.0436157	0	0	0	0.548485	0.492448	0	0
BT771-P10-H03	1.59167	1.27413	0	0	0.0288264	0	0	0	0.557439	0.594491	0.0965001	0
BT771-P10-H05	1.61872	-1.73337	0	0	0.0437887	0	0	0	0.258444	0	0	0
BT771-P10-H09	1.06163	-2.27754	0	0	0.483323	0	0	0	0	0	0.253127	0
BT771-P10-H10	1.94433	-1.50272	0	0	0.0639485	0	0.385239	0	0.179361	0.121715	0	0
BT771-P10-H11	1.37847	-1.52562	0.641269	0	0.100472	0.0968181	0	0	0.323645	0	0	0
BT771-P12-A08	1.69144	-1.45589	0	0.0253135	0.024161	0	0	0	0.576819	0	0	0
BT771-P12-A12	1.10685	-0.680805	0	0	0.0392699	0	0	0	0.330831	0	0	0
BT771-P12-B03	1.75558	-1.40856	0	0	0.0286417	0	0	0	0.572256	0	0	0
BT771-P12-B04	1.16823	-0.887726	0	0	0.02529	0	0.862015	0	0.687899	0.294722	0	0
BT771-P12-B06	-1.27779	-0.964786	0	0.0170308	0.0918806	0	0	0	0.642032	0	0	0
BT771-P12-B12	1.97995	-1.61159	0.909666	0.0191914	0.0639485	0	0	0	0.7741	0	0	0
BT771-P12-C01	0.980452	0.533004	0	0	0.0497237	0	0	0	0.517869	0	0	0
BT771-P12-C03	-1.49889	-1.06636	0	0	0.0523819	0	0	0	0.486922	0.0439055	0.78381	0
BT771-P12-C10	1.58063	-1.28661	0	0	0.0502237	0	0	0.034256	0.718731	0	0	0
BT771-P12-C11	-0.935093	-0.590811	0	0.0229331	0.0546809	0	0	0	0.64956	0	0	0
BT771-P12-D03	-1.4079	-0.757132	0	0.0396978	0	0	0	0	0.574834	0	0	0
BT771-P12-D05	1.33429	0.749929	0	0	0.0366176	0	0	0	0.839951	0	0	0
BT771-P12-D06	1.69264	-1.22857	0	0	0.142452	0	0	0	0.673834	0	0	0
BT771-P12-E11	0.819064	0.473247	0	0	0.0571176	0	0	0	0.477226	0	0	0
BT771-P12-F06	-0.412705	-0.582736	0	0.0466297	0.0133206	0	0	0	0.746005	0	0	0
BT771-P12-F09	0.935918	1.0046	0	0	0.0129231	0	0	0	0.784856	0.758684	0	0
BT771-P12-G04	1.65485	-1.09272	0	0	0.0410191	0	0	0	0.413132	0	0	0
BT771-P12-G10	1.35103	-0.605879	0	0	0	0	0	0	0.471466	0	0	0
BT771-P12-H09	1.91909	-1.69156	0	0.0107271	0.0299304	0	0	0	0	0	0	0
BT771-P12-H11	0.536256	0.423047	0	0	0	0	0	0	0.630146	0	0	0
BT771-P6-A01	2.19975	1.96868	0	0.0557766	0.0743217	0	0	0	0.656131	0.119556	0.0240152	0
BT771-P6-A02	2.02062	1.64213	0	0	0.118975	0	0	0	0.701621	0.67853	0	0
BT771-P6-A03	1.08478	-0.149645	0	0	0.0216935	0	0	0.467602	0.402455	0.534256	0.0262729	0
BT771-P6-A04	2.53389	-2.37893	0.842518	0.0253135	0.709686	0	0	0	0.21917	0	0	0
BT771-P6-A05	-1.67957	-0.886295	0	0	0.0917442	0	0	0.531805	0.364607	0.199533	0.270445	0
BT771-P6-A06	-0.903637	0.600895	0	0.0325963	0.290624	0	0	0.267732	0.414785	0.585595	0.0698621	0
BT771-P6-A08	1.04367	-0.821922	0.153845	0	0.0740226	0	0.127758	0	0.323816	0.500441	0.410547	0
BT771-P6-A09	1.29143	-1.55054	0.159809	0	0.0810602	0	0.0567095	0	0.414831	0	0.0820142	0
BT771-P6-A10	2.4925	-2.5949	0.917524	0	0.644104	0	0	0	0	0	0	0
BT771-P6-A11	1.00184	1.12438	0	0.0351522	0.0698073	0	0	0	0.415447	0.697838	0.627342	0
BT771-P6-A12	2.0916	-1.83072	0	0.0279352	0.0333906	0	0.458376	0	0.0453147	0.0295978	0.265065	0
BT771-P6-B01	0.991197	1.11449	0.0369112	0	0.0312119	0	0	0.437253	0.486865	0.191963	0.401118	0
BT771-P6-B02	1.56561	-1.24458	0	0	0.0803374	0	0	0	0.564386	0.0748648	0.0469594	0
BT771-P6-B03	-0.527202	1.29855	0.154223	0	0.068435	0	0	0.352803	0.515188	0.506157	0.139821	0
BT771-P6-B04	-0.724564	-0.627979	0	0	0.0360825	0.0326389	0.166881	0.337191	0.540603	0.352857	0.467812	0
BT771-P6-B05	0.608654	1.32966	0	0.0162164	0.0550078	0	0	0.198344	0.673549	0.297023	0	0
BT771-P6-B06	1.66714	-1.82343	0.2214	0.0093383	0.258926	0	0.0419069	0.0979598	0.3532	0.196165	0.379319	0
BT771-P6-B07	0.478294	1.1432	0	0	0.0326663	0	0	0.407073	0.593964	0.385968	0.427311	0
BT771-P6-B09	2.32329	-2.03453	0.043713	0.0229331	0.0982232	0	0.467864	0	0.39844	0	0	0
BT771-P6-B10	-0.0390374	0.918437	0	0	0.0262254	0	0	0.297601	0.552785	0.351777	0.405131	0
BT771-P6-B11	2.57022	-2.38669	0	0.0208019	0.0933819	0	0.165358	0	0	0	0	0
BT771-P6-B12	0.754605	-0.281802	0	0	0.0940622	0	0.169339	0.122738	0.513888	0.701324	0	0
BT771-P6-C02	0.877157	-1.25225	0.201318	0	0	0	0	0.119474	0.232836	0	0.0540942	0
BT771-P6-C04	-0.780204	0.946304	0.109089	0	0.0571176	0	0	0.190333	0.291478	0	0.293732	0
BT771-P6-C05	0.290997	0.185101	0	0	0.0503908	0	0	0.0430245	0.34631	0	0.311465	0
BT771-P6-C06	2.25977	-2.26148	0.524121	0.0194603	0.0125248	0	0	0.233243	0.230098	0.0406062	0	0
BT771-P6-C07	1.49523	1.7401	0	0.0389462	0.0665906	0	0	0.605106	0.470462	0.617086	0.267383	0
BT771-P6-C11	2.00095	-2.53638	0	0	0.0295624	0	0.249695	0	0.283094	0	0	0
BT771-P6-D01	1.0035	-1.37085	0	0	0.0958172	0	0	0	0	0	0.393332	0
BT771-P6-D03	2.16271	-2.58488	0	0	0.311796	0.0440322	0.341521	0	0	0	0	0
BT771-P6-D05	0.517454	0.0858904	0	0	0.0954126	0	0.423858	0.305231	0.351284	0.264346	0.120873	0
BT771-P6-D06	1.93599	-1.79391	0.542434	0.0194603	0.028086	0	0	0.3698	0.251782	0	0.0159525	0
BT771-P6-D09	2.51205	-2.61099	0	0	0.451625	0	0.755846	0	0	0	0	0
BT771-P6-D11	2.59434	-2.59444	0	0	0.0362613	0	0.467421	0	0.218999	0	0	0
BT771-P6-D12	2.57052	-2.29975	0.421946	0	0.0983566	0	0.589442	0	0.339637	0.0150577	0	0
BT771-P6-E02	1.35926	-0.481604	0	0.0137592	0.0396203	0	0	0	0.28233	0.700385	0	0
BT771-P6-E04	2.2058	-2.31687	0.395971	0	0.134539	0	0.463009	0	0	0	0.429145	0
BT771-P6-E05	-0.124297	0.582962	0.278009	0	0.0533701	0	0	0.346304	0.463059	0.105265	0.0692964	0
BT771-P6-E06	2.27895	-2.38727	0.244091	0.00172059	0.382187	0	0.253042	0	0.111914	0	0.133615	0
BT771-P6-E07	-0.823243	-0.51384	0	0	0.0160824	0	0	0	0.142414	0.220167	0.119949	0
BT771-P6-E09	1.45294	-1.49366	0.361534	0	0.0333906	0	0.238211	0	0.219387	0	0.454871	0
BT771-P6-E10	0.226543	-1.95457	0	0	0.000633621	0	0	0	0	0	0	0
BT771-P6-E11	1.35673	-1.05117	0.441003	0.0318248	0.123861	0	0	0	0.428827	0	0	0
BT771-P6-F01	0.955293	1.06917	0	0	0.0518863	0	0	0.321945	0.49777	0.408198	0	0
BT771-P6-F02	-0.428126	1.45796	0	0	0.0490537	0	0	0	0.321569	0.423257	0.077298	0
BT771-P6-F03	-1.33483	-0.178234	0	0	0.0485493	0	0	0.41004	0.431154	0.461591	0.318039	0
BT771-P6-F04	1.0011	1.39524	0	0	0.0218841	0	0	0.559427	0.545393	0.469325	0.408124	0
BT771-P6-F05	2.32486	-1.85038	0	0	0.196511	0	0.0957477	0	0.329531	0	0.0359665	0
BT771-P6-F06	2.26499	-2.61742	0	0	0.619428	0	0.275034	0	0	0	0	0
BT771-P6-F07	1.27049	-1.76622	0.528977	0	0.0525476	0	0	0.1662	0.394938	0.362258	0	0
BT771-P6-F08	1.58676	1.47835	0	0	0.041714	0	0	0	0.51431	0.612461	0	0
BT771-P6-F09	1.24773	1.23676	0	0	0.093791	0	0	0.408175	0.596199	0.801736	0.0408886	0
BT771-P6-F10	-0.131625	-1.50255	0.53379	0	0.0658164	0	0	0	0.157688	0.329265	0.82919	0
BT771-P6-F11	-0.186161	-0.917858	0	0	0.0380354	0	0	0	0.451093	0	0.572706	0
BT771-P6-G03	-0.282518	-0.182111	0.532794	0	0.326722	0	0	0.345216	0.330101	0.370392	0.405875	0
BT771-P6-G05	1.39294	-1.20915	0	0	0.0554961	0	0.333274	0	0.406265	0.254463	0.241363	0
BT771-P6-G07	0.479589	-1.08346	0	0	0.0158874	0	0	0.366113	0.233839	0.431156	0.0208214	0
BT771-P6-G09	1.59389	-1.20833	0	0	0	0.289696	0	0	0.124585	0	0	0
BT771-P6-G10	1.23299	-1.97634	0	0	0.117402	0	0	0	0.0179132	0	0.544506	0
BT771-P6-G11	1.70174	-2.13413	0	0.891704	0.0385647	0	0	0	0	0	0	0
BT771-P6-G12	-0.688528	1.45302	0	0	0	0	0	0	0.450489	0	0	0
BT771-P6-H01	0.232962	-1.30577	0.322241	0	0.0209281	0	0	0	0.169266	0	0.191173	0
BT771-P6-H02	2.40784	-2.14118	0.425623	0.029239	0.0699598	0	0.494423	0	0.312033	0	0.0353177	0
BT771-P6-H03	-0.661951	-1.94094	0	0.01045	0	0	0	0	0.169083	0	0.64376	0
BT771-P6-H04	0.656281	0.729227	0	0	0.0705668	0	0	0.494377	0.365075	0.546826	0	0
BT771-P6-H07	1.70491	-1.29114	0	0	0.0170604	0	0.0106937	0.222505	0.315238	0	0.54653	0
BT771-P6-H11	0.60278	-1.84962	0.255416	0	0.0984901	0.165083	0	0	0.274265	0	0.46994	0
BT771-P7-A01	0.37243	-1.59192	0	0	0.211275	0	0.345356	0	0.236828	0.0977349	0.350894	0
BT771-P7-A05	1.40136	1.38515	0	0	0.0740226	0	0	0.162018	0.647701	0.637262	0.231086	0
BT771-P7-A07	2.45531	-2.27931	0	0.306924	0.297164	0	0.0260935	0	0.322562	0	0.0937717	0
BT771-P7-A08	2.19104	-2.11074	0	0	0.771631	0	0	0	0	0	0.0353177	0
BT771-P7-A09	0.285111	-1.9274	0	0	0.175251	0	0.0682842	0	0	0.268525	0	0
BT771-P7-A10	1.05995	-0.185871	0.0750854	0	0.0490537	0	0	0	0.210478	0	0.238404	0
BT771-P7-A11	1.37182	-0.941019	0.114104	0	0.0696549	0	0	0	0.579283	0.0684328	0	0
BT771-P7-A12	1.54729	1.39031	0.0622521	0	0.0577628	0	0	0.35334	0.573648	0.264734	0	0
BT771-P7-B01	-0.495808	0.403727	0	0	0.0359051	0.306735	0	0	0.457846	0.0585407	0.251951	0
BT771-P7-B03	2.00214	-1.7398	0	0	0.16122	0	0	0	0.405671	0	0.0882251	0
BT771-P7-B04	2.23193	-2.21092	0	0.0221356	0.0332102	0	0	0	0.162661	0	0.117934	0
BT771-P7-B05	1.51232	-1.58688	0.467708	0	0.077864	0	0	0	0.163939	0	0.019901	0
BT771-P7-B06	0.861453	-2.15365	0	0	0.364212	0	0	0	0.108035	0	0.340392	0
BT771-P7-B07	0.646573	1.09116	0	0	0.0543539	0	0	0	0	0	0	0
BT771-P7-B08	1.90885	-2.51757	0	0	0.513908	0	0	0	0	0	0	0
BT771-P7-B09	-1.03779	-0.941874	0	0	0.0475377	0	0	0.153357	0.615819	0.1685	0.448954	0
BT771-P7-B10	2.12062	-2.14427	0.458138	0	0.398901	0	0.279335	0	0.328105	0	0.0721164	0
BT771-P7-B11	0.472302	0.0947174	0	0	0.169357	0.399874	0	0	0.235106	0.400839	0	0
BT771-P7-C02	1.54126	-1.95873	0.210033	0	0.049388	0.55223	0.201394	0	0.225649	0	0.0641373	0
BT771-P7-C03	0.498894	1.62836	0	0	0.103477	0	0	0.350076	0.171661	0.453363	0	0
BT771-P7-C04	1.88978	-0.906097	0.334324	0	0.14735	0	0.1195	0	0.507854	0.601287	0	0
BT771-P7-C05	-0.331449	-0.261723	0	0	0.0853414	0	0	0	0.549466	0.325685	0.293109	0
BT771-P7-C06	2.36411	2.22405	0	0	0.178565	0	0	0	0.781776	0	0	0
BT771-P7-C07	1.38517	-1.09548	0	0.107267	0.06874	0.36155	0.504289	0.126279	0.470462	0	0	0
BT771-P7-C11	1.96133	-1.79446	0.385839	0	0.0548451	0	0.211953	0	0.338417	0.126035	0.0706164	0
BT771-P7-C12	1.03207	0.00941752	0	0	0.0321223	0	0	0.0688779	0.27317	0.456814	0.381602	0
BT771-P7-D01	0.171428	-0.515432	0.464705	0	0.559682	0	0	0	0.206954	0	0	0
BT771-P7-D02	-1.16456	0.687173	0	0.0336211	0.0582451	0	0.34458	0	0.394059	0	0.193941	0
BT771-P7-D03	1.40349	-0.945752	0	0.0569589	0.118131	0	0	0	0.486055	0	0	0
BT771-P7-D04	0.549893	-0.437239	0	0	0.0341119	0	0	0	0.23352	0	0	0
BT771-P7-D05	0.355103	-0.619177	0	0	0.0389181	0	0.224244	0	0	0	0.187903	0
BT771-P7-D06	1.7434	-1.14601	0.185503	0	0	0	0	0	0.463253	0.432142	0	0
BT771-P7-D07	1.15434	-2.03831	0	0	0.190573	0	0	0	0.0128178	0	0.192678	0
BT771-P7-D08	0.228702	-1.13546	0	0	0.0410191	0	0	0	0.316425	0	0	0
BT771-P7-D09	0.710504	-0.660322	0.559218	0	0.0619062	0	0.270268	0.425978	0.530268	0	0.525735	0
BT771-P7-D10	-0.600856	-1.90923	0	0	0.455686	0	0	0	0.106663	0	0.493728	0
BT771-P7-D11	-0.668872	1.22746	0.337369	0.0310513	0.0373273	0	0	0.615915	0.550013	0.156575	0.0698621	0
BT771-P7-D12	2.51027	-2.41737	0.344358	0	0.0545181	0	0	0	0.123034	0.0572179	0	0
BT771-P7-E01	0.0430221	0.602481	0	0.0590741	0.0688939	0	0	0.490802	0.475504	0.106082	0.240221	0
BT771-P7-E02	2.23953	-2.26877	0.407843	0	0.00748099	0.156561	0.446493	0	0	0	0	0
BT771-P7-E03	0.950624	-1.28603	0.468803	0.0351522	0.105284	0.0393821	0.301771	0.25325	0.410793	0	0	0
BT771-P7-E04	2.26763	2.17076	0	0	0	0	0	0	0.797187	0	0	0
BT771-P7-E05	0.5117	0.822714	0	0.0297574	0.052052	0	0	0.213335	0.328276	0.370169	0	0
BT771-P7-E08	0.46485	0.390837	0	0	0.0982232	0	0	0	0.36666	0	0.171757	0
BT771-P7-E09	1.99304	-1.27317	0.106952	0	0.039094	0	0.903339	0	0.224052	0	0.0930849	0
BT771-P7-E12	2.28817	-1.81971	0	0	0.104383	0	0	0	0.32166	0.0255696	0.345582	0
BT771-P7-F01	-0.303492	-0.552286	0	0.454216	0.120776	0	0	0.126279	0.546876	0.457424	0.394474	0
BT771-P7-F03	1.36785	-2.2597	0.172116	0	0.0376821	0	0	0	0	0	0.647411	0
BT771-P7-F04	0.283571	-1.23007	0.0482303	0	0.0704158	0	0	0	0.167132	0	0.105491	0
BT771-P7-F05	2.31187	-2.63308	0	0	0.316312	0	0	0	0	0	0.0606391	0
BT771-P7-F06	2.10752	-1.69019	0	0	0.0854837	0	0.719843	0	0.426409	0.416285	0	0
BT771-P7-F07	2.15277	-2.31892	0.133328	0	0.0803374	0	0	0	0.254782	0	0.472431	0
BT771-P7-F09	1.99295	-1.91687	0	0	0.0896769	0	0	0	0.0156844	0	0.18171	0
BT771-P7-F10	-1.36604	0.552081	0	0	0.0729772	0	0	0	0.275873	0	0.529437	0
BT771-P7-F12	0.409177	0.0642762	0	0	0.0968905	0	0.0651694	0	0.505344	0.548423	0.197817	0
BT771-P7-G01	2.19005	-2.15106	0.623686	0.0364222	0.0861889	0	0.518522	0	0.259436	0	0	0
BT771-P7-G02	1.60081	-1.13038	0	0	0.148406	0.0341522	0.323674	0	0.390124	0.366049	0	0
BT771-P7-G04	-0.531533	-0.965693	0.08689	0	0	0	0	0	0.19841	0	0.308662	0
BT771-P7-G05	1.97202	1.30774	0	0	0.184034	0	0	0.101087	0.579762	0	0	0
BT771-P7-G06	1.21963	1.09088	0	0	0	0	0.204447	0.579971	0.65288	0.586862	0.065293	0
BT771-P7-G07	1.79191	-2.01835	0	0.0550649	0.0837814	0	0.0831754	0	0	0	0	0
BT771-P7-G08	2.30423	-1.70343	0.0855667	0	0.0572789	0	0	0	0.463949	0.190765	0	0
BT771-P7-G09	1.29238	-1.59153	0	0	0.093791	0	0	0	0	0	0	0
BT771-P7-G11	1.83316	-1.45775	0	0	0	0	0	0	0	0	0	0
BT771-P7-G12	1.62617	-1.63365	0	0	0.176644	0	0.71277	0	0.249159	0.464102	0	0
BT771-P7-H01	0.669611	1.14149	0	0.0325963	0.0648854	0	0	0.26817	0.382413	0.749505	0.0937717	0
BT771-P7-H02	2.34367	-2.63588	0.0799169	0	0.577261	0	0	0	0.107522	0	0	0
BT771-P7-H03	1.87041	-2.46039	0.311717	0	0.0979578	0	0.0246148	0	0.0891521	0	0.154894	0
BT771-P7-H05	1.48951	1.19916	0	0	0.289935	0	0	0	0.597522	0.78771	0	0
BT771-P7-H07	-0.536582	0.406698	0	0	0.0532059	0	0	0.156508	0.111497	0	0.251224	0
BT771-P7-H08	1.06502	1.19247	0	0	0.041714	0	0	0.291455	0.533428	0.29045	0.365392	0
BT771-P7-H09	2.16613	-1.86272	0	0	0	0	0	0	0	0	0.033361	0
BT771-P7-H10	0.892213	-2.15153	0	0	0	0	0	0	0	0	0	0
BT771-P7-H11	1.04943	0.529088	0	0	0.13274	0	0	0.57439	0.516739	0.54023	0.611633	0
BT771-P7-H12	1.97933	-2.03938	0	0	0.535211	0	0	0	0.0620519	0	0.188734	0
BT771-P8-A02	0.292845	1.09896	0	0	0.0401452	0	0	0.308749	0.542827	0.456919	0.267037	0
BT771-P8-A03	2.40521	-2.43599	0	0	0.00126535	0.12988	0	0	0.140395	0	0.228802	0
BT771-P8-A05	0.593666	0.735035	0	0	0.0963538	0	0	0.333616	0.387044	0.473269	0.151516	0
BT771-P8-A06	-0.897402	0.686026	0	0.0237285	0.122916	0	0	0.359797	0.345626	0.141551	0.179772	0
BT771-P8-A07	2.4701	-2.32937	0	0	0.0174504	0	0.288691	0	0.255239	0	0	0
BT771-P8-A08	-1.58205	-0.971011	0	0	0.345899	0	0	0	0.298949	0	0.672168	0
BT771-P8-A09	-0.0446325	-0.2178	0	0	0.0676682	0	0	0.161001	0.290098	0.225343	0.226605	0
BT771-P8-A12	1.44194	-1.90922	0	0	0.0359051	0	0	0	0.214231	0	0.126199	0
BT771-P8-B02	-0.585255	0.503191	0	0	0.0607992	0	0	0	0.563017	0.374101	0.644037	0
BT771-P8-B04	0.454255	0.916415	0	0	0.128058	0	0	0.363146	0.382573	0.492659	0.462034	0
BT771-P8-B05	1.94066	-1.61181	0	0.0809406	0.128635	0	0.0353891	0	0.264592	0	0.0359665	0
BT771-P8-B06	1.58552	-1.73816	0	0.036169	0.0670524	0	0.0947988	0.322567	0.103711	0.489091	0	0
BT771-P8-B07	1.42513	-0.790369	0	0	0.0708689	0	0.0336665	0	0.170669	0	0	0
BT771-P8-B08	1.33985	-2.01923	0	0	0.162012	0.3621	0	0	0.110912	0	0.0444646	0
BT771-P8-B09	1.17898	-1.85525	0.213233	0.0218685	0.0895391	0.329809	0	0.0325251	0.242052	0.0716793	0.104837	0
BT771-P8-B10	2.15199	-1.45465	0	0	0.0830689	0	0	0	0.40339	0	0.10696	0
BT771-P8-B12	2.26739	-2.02786	0.0638828	0	0.0566323	0	0	0	0.300501	0	0.224062	0
BT771-P8-C04	1.18485	-0.829483	0	0	0.0983566	0	0.182621	0	0.451299	0.57908	0.27112	0
BT771-P8-C06	-0.681083	1.00418	0.056361	0	0.0681286	0	0	0.358921	0.477751	0.377071	0.122406	0
BT771-P8-C08	1.58493	1.71729	0	0	0.100076	0	0	0	0.497736	0.388573	0	0
BT771-P8-C09	1.43811	1.50855	0	0	0.0211202	0.0371514	0	0.0423632	0.407622	0.32599	0	0
BT771-P8-D04	-1.39548	0.442504	0	0	0.143421	0	0	0	0.130346	0.0364254	0	0
BT771-P8-D05	1.64259	-2.09243	0.390751	0	0	0	0	0	0.238117	0	0	0
BT771-P8-D08	2.0531	-2.25512	0.332682	0.0736877	0.147145	0	0	0	0	0	0.0864656	0
BT771-P8-D09	2.09539	-2.26258	0.452174	0	0.0598447	0	0	0	0.482816	0	0.0934292	0
BT771-P8-D10	1.85782	-1.13107	0	0	0.0966222	0	0.332941	0	0.558933	0	0	0
BT771-P8-D11	2.439	-2.38332	0.481587	0.0364222	0.478045	0	0	0	0	0	0	0
BT771-P8-D12	-0.246861	0.208417	0	0	0	0	0	0	0.481789	0	0	0
BT771-P8-E02	1.9236	-1.63078	0	0.0118334	0.0863282	0	0.0319351	0	0.343151	0.360756	0.138248	0
BT771-P8-E05	1.21723	0.880168	0	0	0.0267855	0	0	0.256528	0.246421	0.458926	0	0
BT771-P8-E07	0.716271	-0.980741	0	0	0.119937	0	0	0	0	0	0.561513	0
BT771-P8-E08	0.880189	-0.454539	0	0	0.0286417	0.305301	0	0.424635	0.531534	0.289558	0	0
BT771-P8-E09	1.96074	-1.58592	0	0	0.0820675	0	0.217995	0	0.305121	0	0	0
BT771-P8-E11	1.15154	1.73478	0	0.0263662	0.0728277	0	0	0.335198	0.587256	0.657121	0	0
BT771-P8-E12	1.17973	-1.37714	0	0	0.0483807	0	0	0	0	0.39362	0.475061	0
BT771-P8-F02	-1.01858	-0.79164	0	0	0.0556588	0.501641	0	0	0.389588	0	0.165276	0
BT771-P8-F03	1.77057	-1.41319	0	0.0237285	0.0522162	0.430593	0	0	0.278953	0.25856	0	0
BT771-P8-F04	-0.291206	0.732473	0	0.0569589	0.165619	0.192826	0	0.659079	0.489112	0.407693	0.360668	0
BT771-P8-F05	1.74417	-1.81101	0.549142	0	0.0245378	0	0	0	0.0784742	0	0	0
BT771-P8-F07	1.87173	0.296795	0	0	0.0273441	0	0	0	0.614952	0.234956	0	0
BT771-P8-F09	2.49536	-2.47832	0	0.59752	0.620733	0	0.338882	0	0	0	0	0
BT771-P8-F10	1.45413	-1.06751	0.509218	0	0.0502237	0	0.056173	0	0.311189	0.439184	0	0
BT771-P8-F11	-0.487684	-1.96132	0.0826267	0	0.0725271	0	0	0	0.230144	0	0.0381187	0
BT771-P8-F12	-0.84674	-0.163599	0	0.11315	0.0394444	0	0	0.0417006	0.411854	0	0.0734209	0
BT771-P8-G01	2.40603	-2.1293	0	0.0218685	0.255656	0	0.23176	0	0	0	0	0
BT771-P8-G02	1.38797	-1.3568	0	0	0.0870305	0.0376486	0	0	0.370219	0	0.207349	0
BT771-P8-G03	0.997547	-0.980677	0.0309191	0	0.0696549	0	0.175125	0.37411	0.472641	0.0735538	0.25529	0
BT771-P8-G04	1.80242	-2.40746	0	0	0	0	0	0	0	0	0	0
BT771-P8-G05	2.4191	-2.19966	0	0	0.0353685	0	0	0	0	0	0.0240152	0
BT771-P8-G06	0.816138	0.725361	0	0	0.072077	0	0.240339	0.377628	0.489067	0.685878	0.430183	0
BT771-P8-G08	2.34285	-2.15509	0.46768	0.0401982	0.113976	0	0	0	0	0.215437	0.676874	0
BT771-P8-G09	2.49451	-2.10659	0.631432	0	0.134427	0	0	0.0740449	0	0	0	0
BT771-P8-G10	1.96232	-1.02968	0	0	0.100208	0	0	0	0.304082	0	0.165919	0
BT771-P8-G12	0.22566	-0.819015	0	0	0.103087	0	0.408982	0	0.17903	0	0.628813	0
BT771-P8-H01	1.37577	-1.02066	0.958248	0	0.0342923	0	0.635133	0	0.0426694	0	0	0
BT771-P8-H02	2.25654	-2.39872	0.787269	0.0148538	0.263236	0	0	0	0.263737	0	0.363956	0
BT771-P8-H03	2.35595	-2.13134	0.634533	0	0.0658164	0	0	0	0	0	0.11809	0
BT771-P8-H04	2.30067	-2.34103	0	0.0237285	0.060481	0	0	0	0.205881	0	0	0
BT771-P8-H05	2.02909	-1.57268	0	0.0354074	0.0781557	0	0.507193	0	0.173965	0	0	0
BT771-P8-H06	1.09931	0.647236	0	0	0.0551706	0.540005	0.270401	0	0.371964	0.595407	0	0
BT771-P8-H08	2.27117	-2.25266	0.249185	0.494268	0.446332	0	0.827963	0	0.225855	0	0	0
BT771-P8-H10	1.61873	-1.37171	0	0	0.0553333	0	0	0	0.280687	0	0	0
BT771-P8-H11	1.69495	1.76647	0	0	0.147145	0	0	0	0.687899	0.639832	0	0
BT771-P8-H12	0.773904	-0.0632764	0	0.0938874	0.23774	0	0	0	0.476325	0.47334	0.0408886	0
BT771-P9-A01	0.412305	0.89347	0	0	0.0243487	0	0	0.241819	0.36739	0.482354	0	0
BT771-P9-A03	0.375591	0.715344	0	0.0191914	0.0903689	0	0	0.433353	0.500918	0.353655	0.230896	0
BT771-P9-A04	-0.190046	0.375474	0	0.0226679	0.0461829	0.557713	0	0.262292	0.542199	0.47422	0.497708	0
BT771-P9-A05	1.97604	-2.09102	0	0	0.0842081	0	0	0	0.133163	0	0	0
BT771-P9-A06	2.12305	-1.11532	0	0	0.0517207	0	0.329882	0	0.254326	0	0.0526825	0
BT771-P9-A07	-0.542499	1.19623	0	0.0421938	0.181805	0	0	0.479908	0.445333	0.259111	0	0
BT771-P9-A08	0.791018	0.0831438	0	0	0.0645731	0	0	0	0.505686	0.632438	0.156233	0
BT771-P9-A09	0.955497	1.23486	0	0	0	0.613078	0	0	0.101239	0	0	0
BT771-P9-A10	-0.75773	1.61865	0.227813	0	0.0746193	0	0	0.468944	0.476941	0.282046	0	0
BT771-P9-A11	0.804567	1.12256	0	0	0.111867	0	0	0.269484	0.625344	0	0	0
BT771-P9-B03	2.33854	-1.96908	0	0.0509978	0.704539	0	0	0	0	0	0	0
BT771-P9-B06	1.59315	-1.94755	0.501528	0	0.133866	0	0.369011	0	0	0	0	0
BT771-P9-B07	0.833217	-1.04465	0	0	0.0551706	0	0.143046	0	0.310447	0.236552	0	0
BT771-P9-B08	1.7299	-1.29415	0	0	0	0	0.246746	0	0.360763	0	0	0
BT771-P9-B10	1.36538	-1.79528	0.234282	0	0.0927016	0	0	0	0.11611	0.119638	0.0854051	0
BT771-P9-C02	2.02858	-1.65812	0.540301	0	0.197596	0.357638	0.136225	0	0.289425	0	0	0
BT771-P9-C03	2.5867	-2.37502	0.453928	0	0.360825	0	0	0	0.365885	0	0	0
BT771-P9-C04	-0.557971	-0.657118	0	0	0.109989	0	0	0	0.253972	0	0	0
BT771-P9-C07	2.54643	-1.97815	0.493641	0	0	0.583892	0	0	0.319801	0	0.0668258	0
BT771-P9-C08	0.948059	0.947796	0	0	0.114222	0	0	0	0.430789	0.457647	0	0
BT771-P9-C09	1.18212	-1.76599	0	0	0.0566323	0	0	0	0	0	0	0
BT771-P9-C10	2.20378	1.1717	0	0	0.153068	0	0	0	0.68272	0.303912	0.231484	0
BT771-P9-C12	2.42032	-2.31122	0	0.0526805	0.0321223	0	0.13706	0	0.214813	0	0	0
BT771-P9-D02	1.51022	-1.63113	0	0	0.0619062	0	0	0	0.269269	0	0.1507	0
BT771-P9-D04	1.77573	1.46883	0.0628457	0	0.0411935	0	0	0.247711	0.567055	0.679316	0.286223	0
BT771-P9-D05	1.39349	-1.35601	0.390484	0	0.0540269	0	0.562883	0	0.321774	0	0	0
BT771-P9-D06	2.09463	-1.69516	0	0	0.0978244	0	0	0	0.337276	0	0	0
BT771-P9-D07	0.190285	-0.457695	0	0	0	0	0.589952	0	0.234193	0	0.161515	0
BT771-P9-D08	-0.577722	-1.79842	0	0	0.0856244	0	0	0.183819	0.160688	0.552014	0.796007	0
BT771-P9-D11	2.53466	-2.27812	0.32857	0	0.0807714	0	0	0	0	0	0	0
BT771-P9-E02	1.30934	-1.31163	0.648454	0	0.088567	0.199367	0.133919	0	0.442584	0	0	0
BT771-P9-E03	2.1716	-2.32482	0.344358	0	0.00727675	0	0	0	0.266725	0	0	0
BT771-P9-E05	2.04629	-1.99574	0.340962	0	0	0	0.633603	0	0.0974586	0	0	0
BT771-P9-E07	1.41598	-1.3958	0	0	0.0884277	0	0.420533	0	0.134977	0	0	0
BT771-P9-E09	1.75596	-2.03848	0.471048	0.00456548	0.0475377	0	0.24229	0	0.0062961	0	0.0875227	0
BT771-P9-E10	-0.849312	1.47734	0	0	0.0877313	0	0	0.487482	0.426649	0.584174	0	0
BT771-P9-E12	1.95336	-1.78853	0.266951	0.110419	0.123742	0	0	0	0.165091	0	0.25439	0
BT771-P9-F01	1.53871	-1.43829	0	0	0.139738	0	0	0	0.274288	0.311096	0	0
BT771-P9-F02	2.02135	-1.59507	0.04404	0	0.0430996	0	0.332719	0	0.300763	0.28849	0	0
BT771-P9-F03	0.962	0.39829	0	0.0328535	0.130812	0	0	0.291356	0.526241	0.487248	0	0
BT771-P9-F09	2.51962	-2.45561	0.345312	0	0.0424075	0	0	0	0.335873	0	0	0
BT771-P9-F10	0.747807	-1.26191	0	0.0934708	0.06874	0	0	0	0.424504	0	0	0
BT771-P9-F11	1.95951	-1.98469	0.496322	0	0.0507237	0	0	0	0.0369843	0	0	0
BT771-P9-G02	1.23738	1.02113	0	0	0.0291944	0	0	0.0309554	0.448709	0.71988	0	0
BT771-P9-G03	-0.451111	-0.649669	0.215688	0	0.0525476	0	0.415766	0	0.178756	0	0.328576	0
BT771-P9-G04	1.83312	-1.43749	0	0	0.0470304	0	0	0	0.384592	0	0	0
BT771-P9-G05	-0.832008	-0.212787	0	0	0.102044	0	0	0	0.37858	0.344805	0.348679	0
BT771-P9-G06	-0.657031	-0.602706	0	0	0.0662812	0	0	0.278979	0.456763	0.496814	0	0
BT771-P9-G07	1.19528	0.924833	0	0	0.122798	0	0	0	0.429979	0.498551	0	0
BT771-P9-G08	-0.968695	-1.1112	0	0.135364	0.0658164	0	0.294588	0	0.221976	0	0.553468	0
BT771-P9-G09	0.820985	-1.2325	0	0	0.0164754	0	0	0	0.178859	0.628494	0	0
BT771-P9-G11	2.0013	-1.19317	0	0	0.123978	0	0.0290265	0	0.389177	0.38835	0.157961	0
BT771-P9-H02	0.981018	-1.87851	0.198975	0	0.139628	0	0	0	0.150399	0	0	0
BT771-P9-H03	1.91772	-1.53272	0.944987	0	0.0614326	0.536015	0.00883231	0	0.29709	0	0	0
BT771-P9-H07	0.0145985	-0.485562	0	0	0.109359	0	0	0	0	0	0	0
BT771-P9-H10	-0.622943	-0.10814	0.271442	0.062567	0.142452	0	0	0.282737	0.379322	0.445217	0.728482	0
BT771-P9-H12	2.507	-1.94029	0	0.0218685	0.668457	0	0.583412	0	0.181174	0	0	0
BT786-P3-A01	-1.1572	0.559139	0.428767	0	0.0651962	0.0612213	0	0.0682943	0.446017	0.100095	0	0
BT786-P3-A05	-1.08945	0.691183	0	0	0.0528775	0	0	0.343379	0.422428	0	0.203958	0
BT786-P3-A06	0.429009	0.036914	0.260566	0	0.0258515	0	0	0.289844	0.571002	0	0.113856	0
BT786-P3-A08	1.37537	-0.0787547	0.0767553	0	0.0826407	0	0	0.324573	0.617884	0	0.42802	0
BT786-P3-A09	-0.840567	1.16196	0	0	0	0	0	0.257503	0.425941	0.0932055	0.0778464	0
BT786-P3-A12	-1.02632	1.14723	0	0	0.13024	0	0	0	0.180079	0.205719	0.265151	0
BT786-P3-B01	-0.460216	0.339392	0	0	0.131608	0	0	0.429821	0.293314	0	0.0811128	0
BT786-P3-B04	-0.684078	0.100732	0	0	0.0895391	0	0.0269758	0.353058	0.493253	0	0.505164	0
BT786-P3-B06	-0.895162	1.11483	0	0.0461393	0.0260392	0.0457263	0	0.515401	0.453147	0.451978	0.175499	0
BT786-P3-B07	-0.431629	0.694921	0	0	0	0	0	0.256118	0.420945	0	0.315738	0
BT786-P3-B09	-0.513899	0.390338	0	0	0.0744698	0	0	0.133712	0.107264	0.380193	0.283127	0
BT786-P3-B11	-0.933261	0.656593	0	0	0.0478764	0	0	0.489799	0.273854	0	0.450978	0
BT786-P3-C02	1.05539	-0.210545	0	0	0	0	0	0.406465	0.636579	0.339441	0	0
BT786-P3-C03	-0.603702	0.8607	0	0	0.131835	0	0	0.543221	0.600488	0.179592	0.121641	0
BT786-P3-C05	-0.330283	0.828629	0	0	0.0360825	0	0	0.412315	0.389177	0.530922	0	0
BT786-P3-C06	-0.66931	-0.545994	0	0	0.0383888	0	0.0171244	0.0517478	0.270387	0	0.27785	0
BT786-P3-C08	-0.247371	0.459129	0	0.0404494	0.0785941	0.332619	0	0.314104	0.494759	0	0.296933	0.162879
BT786-P3-C09	-0.577044	1.10028	0	0	0.108093	0	0	0.402255	0.541766	0.0935963	0.364994	0
BT786-P3-C10	-1.06522	0.923584	0	0	0.0286417	0	0	0.0548872	0.176794	0	0.520112	0
BT786-P3-C11	-0.867231	0.162348	0	0	0.0495566	0	0	0.639327	0.442185	0	0	0
BT786-P3-D04	-0.867348	1.34922	0	0	0.0561456	0	0	0.397154	0.213068	0.581803	0	0
BT786-P3-D12	-0.730612	0.782308	0	0	0	0	0	0.24076	0.298413	0.372059	0	0
BT786-P3-E04	-0.392188	0.340585	0	0	0	0	0	0.183325	0.456489	0.359958	0.290791	0
BT786-P3-E06	-0.661359	1.26031	0	0	0.11224	0	0	0.453091	0.504876	0.396155	0	0
BT786-P3-E07	-0.460488	0.298797	0.215758	0	0.0813476	0	0	0.414194	0.37704	0	0.0473712	0
BT786-P3-E10	1.23395	-0.316127	0	0	0.0317587	0	0	0.326919	0.338714	0.155695	0.33906	0
BT786-P3-E12	-0.976628	0.243962	0	0	0.091058	0.385232	0	0.382898	0.28371	0.24329	0	0
BT786-P3-F01	-1.32522	0.433619	0	0	0.0636362	0	0	0.354951	0.227349	0	0.289303	0
BT786-P3-F03	-0.624607	0.0304033	0.319084	0	0.036795	0	0	0.123851	0.610982	0	0.315029	0
BT786-P3-F05	-0.920254	0.77396	0	0	0.0410191	0	0	0.400263	0.394402	0.113519	0.265999	0
BT786-P3-F06	-0.518358	1.01319	0	0.0545884	0.0498909	0	0	0.469015	0.203224	0.296048	0.195204	0
BT786-P3-F07	-0.345358	0.619114	0	0	0	0	0	0.249576	0.470713	0.287375	0.174616	0
BT786-P3-F11	-0.877555	0.93702	0	0	0.14672	0	0	0.321013	0.544116	0	0	0
BT786-P3-G03	-0.95144	0.886572	0	0	0.0510565	0	0.00727291	0.226306	0.501112	0	0.13652	0
BT786-P3-G05	-0.602124	1.07425	0	0	0.0256653	0	0	0.125729	0.377565	0	0.364129	0
BT786-P3-G06	-0.77522	0.7571	0	0	0	0	0	0.516814	0.343675	0	0.115275	0
BT786-P3-G07	-0.562601	0.589126	0	0	0.0466917	0	0	0.236591	0.391379	0	0	0
BT786-P3-G08	-0.933347	0.604586	0	0	0.0738745	0	0	0.314852	0.334482	0.211552	0.143359	0
BT786-P3-G09	-1.00193	0.762224	0.223028	0	0.0990193	0	0	0.445278	0.396945	0	0.365115	0
BT786-P3-G10	-0.988133	1.02541	0	0	0.10139	0	0	0.360942	0.395132	0.116268	0.261587	0
BT786-P3-G11	-0.678586	1.0642	0	0	0	0	0	0	0.540865	0	0.0936005	0
BT786-P3-H01	-0.606568	0.483507	0	0	0	0.278572	0	0.343987	0.389166	0.303912	0.24484	0
BT786-P3-H02	-0.718088	0.97724	0	0	0.113234	0	0	0.287513	0.447192	0.369019	0	0
BT786-P3-H04	-0.875132	0.78538	0	0.0641819	0.183682	0	0	0.215271	0.255125	0.381965	0	0
BT786-P3-H06	-0.595139	0.893472	0	0	0.163977	0	0	0.0923364	0.430322	0	0.36598	0
BT786-P3-H08	-0.677964	0.905807	0	0	0.0492208	0	0	0	0.503108	0	0.0637515	0
BT786-P3-H09	-0.0732253	0.40407	0	0	0	0	0	0.438708	0.422405	0	0.29496	0
BT786-P3-H11	-0.291339	0.573218	0	0	0.071775	0	0	0.209365	0.422668	0	0	0
BT786-P3-H12	-0.598727	0.846946	0	0	0.0550078	0	0	0	0.232676	0	0	0
BT786-P4-A01	0.573753	0.893902	0	0	0.0487179	0	0	0.0850811	0.686655	0	0	0
BT786-P4-A02	0.551748	0.615469	0	0.0384437	0	0	0	0	0.645009	0	0.128894	0
BT786-P4-A03	-0.423943	0.664914	0	0.0143071	0.0975576	0	0	0.0356293	0.645203	0.221904	0	0
BT786-P4-A07	-1.07903	1.20888	0	0	0.0420615	0	0	0.277792	0.491086	0	0.282469	0
BT786-P4-A08	-0.882244	0.452408	0	0	0.0453311	0	0	0.185063	0.548838	0	0	0
BT786-P4-A09	-0.181588	0.417657	0	0	0.0510565	0.200055	0	0.481138	0.50215	0	0.20017	0
BT786-P4-A12	-0.507462	0.915918	0	0	0.0385647	0	0	0.46982	0.74305	0	0.175983	0
BT786-P4-B01	0.0329328	0.149531	0	0	0.072077	0	0	0.473268	0.483329	0.185754	0.195429	0
BT786-P4-B02	-0.480294	1.07791	0	0.0271517	0	0	0	0.42992	0.566576	0	0.29458	0
BT786-P4-B03	-1.04552	1.15749	0	0	0.0813476	0	0	0.543475	0.582933	0	0	0
BT786-P4-B04	1.39587	-0.0863811	0	0	0.030297	0	0	0.327131	0.700492	0	0	0
BT786-P4-B06	-0.495389	0.637881	0	0	0.0304802	0	0	0	0.439937	0	0	0
BT786-P4-B07	-0.841932	0.241506	0.261506	0	0	0.675105	0	0.292627	0.484972	0	0.228006	0
BT786-P4-B09	-0.896887	0.728371	0	0.0159443	0.0738745	0	0	0.438115	0.341645	0.455898	0.492898	0
BT786-P4-B10	-0.600514	0.613813	0	0	0.0215029	0	0	0.403781	0.49988	0.339922	0.390426	0
BT786-P4-C02	-0.46923	0.882514	0	0	0.0230248	0	0	0.432534	0.542291	0.327047	0.0300635	0
BT786-P4-C03	-0.905401	0.370467	0	0	0.0121257	0	0	0.451382	0.706628	0	0	0
BT786-P4-C04	-0.445931	0.656457	0	0.0162164	0.0209281	0	0	0.359274	0.51626	0.192127	0	0
BT786-P4-D01	0.282369	1.01958	0	0	0.0556588	0	0	0.487835	0.658697	0	0.33169	0
BT786-P4-D03	-1.11658	0.452617	0	0	0	0	0	0.363767	0.446439	0	0	0
BT786-P4-D05	-0.693587	0.736656	0	0	0.0550078	0	0	0.491734	0.52899	0	0.170876	0
BT786-P4-D07	-0.425337	0.77102	0	0	0.0275303	0	0	0.520784	0.705784	0.083872	0.270601	0
BT786-P4-D09	0.0573286	0.819652	0	0	0.0477077	0	0	0.173816	0.606283	0.227832	0.11179	0
BT786-P4-D10	0.111544	0.535687	0	0.0183829	0	0	0	0.231802	0.580002	0	0.130823	0
BT786-P4-D11	-0.698646	0.599602	0.568732	0	0.0651962	0	0	0.395953	0.60861	0	0	0
BT786-P4-E01	-0.258365	0.479341	0	0	0	0	0	0.453614	0.587496	0.0227808	0.0891005	0
BT786-P4-E02	-0.996396	0.191251	0	0	0	0	0	0.185218	0.44855	0	0.0556963	0
BT786-P4-E03	0.026168	0.436299	0	0	0.0470304	0	0	0.611111	0.555237	0.099249	0.0530873	0
BT786-P4-E04	0.0571064	0.185896	0.383903	0	0	0	0	0.49887	0.641769	0	0.069485	0
BT786-P4-E05	-0.0782997	0.24045	0	0	0.0816364	0.0949981	0	0.228439	0.329018	0.12891	0	0
BT786-P4-E06	-0.755804	0.78248	0	0	0.0601629	0	0	0.532963	0.513705	0.315732	0.209616	0
BT786-P4-E07	-0.902451	1.11811	0	0	0.0291944	0	0	0.443554	0.44555	0	0.301898	0
BT786-P4-E08	-0.514638	1.21915	0	0.0331087	0.0576015	0	0	0.389666	0.117	0.254769	0	0
BT786-P4-E09	1.22612	-0.602398	0.394301	0	0.0759521	0	0	0	0.605405	0	0	0
BT786-P4-E10	-0.212823	1.06739	0	0	0.0913322	0.227393	0	0.489262	0.430185	0.394395	0	0
BT786-P4-E11	0.897612	0.492634	0	0	0.122324	0	0	0	0.430322	0	0	0
BT786-P4-F04	-0.623068	0.775753	0	0.0268905	0.0468618	0	0	0.574347	0.481743	0.360603	0.0421567	0
BT786-P4-F05	0.444691	0.40059	0.422283	0	0.0658164	0.0459681	0	0.385554	0.61737	0.407447	0	0
BT786-P4-F07	-0.776273	0.91795	0	0	0.039094	0	0	0.509283	0.443907	0.357857	0.327157	0
BT786-P4-F08	-0.319076	0.45431	0	0.0226679	0.0403212	0	0	0.431403	0.650222	0.098209	0	0
BT786-P4-F09	0.346924	-0.0278357	0	0.0231982	0.0667445	0	0	0.594552	0.461428	0.190096	0.204391	0
BT786-P4-F11	-0.604773	0.180104	0	0	0.0807714	0	0	0.50633	0.544207	0	0.138821	0
BT786-P4-F12	-0.829541	1.14817	0	0	0.0550078	0	0	0.411524	0.621693	0	0.243335	0
BT786-P4-G01	-0.487987	0.379344	0	0	0.0166704	0	0	0.49367	0.445698	0.248712	0.165405	0
BT786-P4-G06	0.55068	0.562678	0	0	0.0868912	0	0	0.423011	0.453078	0.285943	0.142091	0
BT786-P4-G07	-0.36049	0.866403	0	0	0.0254777	0	0	0.45247	0.512804	0.352493	0.0171205	0
BT786-P4-G08	0.379492	0.376871	0	0	0.0478764	0	0	0.351899	0.694697	0.147255	0	0
BT786-P4-G09	-0.76068	0.897783	0	0	0.0451595	0	0	0.0678577	0.55485	0.161798	0.230896	0
BT786-P4-H03	0.404315	0.340889	0	0.0205327	0.0264131	0	0	0.182237	0.724298	0	0.410581	0
BT786-P4-H04	-0.511526	0.740178	0	0	0.00686755	0	0	0.450365	0.406287	0	0	0
BT786-P4-H05	-0.635293	0.91312	0	0	0.0577628	0	0	0.346572	0.172813	0.449771	0	0
BT786-P4-H07	-0.204161	0.474308	0	0	0.0439602	0.667499	0	0.153357	0.532082	0	0.253404	0
BT786-P4-H08	1.49665	-0.0136616	0	0	0.0295624	0	0	0.141189	0.474854	0.214921	0.191398	0
BT786-P4-H11	-0.290183	0.86555	0	0.012385	0.0154945	0	0	0.518029	0.602256	0.503434	0	0
BT786-P4-H12	-0.44823	0.859357	0	0	0.0633225	0	0.00633359	0.295609	0.542872	0.412775	0.204841	0
BT786-P5-A02	-1.07259	0.380083	0	0.0189222	0.0623797	0	0	0.0841387	0.494439	0	0.277435	0
BT786-P5-A04	-0.830525	0.595858	0	0	0.024161	0	0	0.246623	0.359269	0	0.116218	0
BT786-P5-A05	-0.741378	0.68534	0	0.0253135	0.0585647	0	0	0.209732	0.606545	0	0.118557	0
BT786-P5-A06	-0.391263	0.717446	0	0	0.0812039	0	0	0.288064	0.600773	0	0	0
BT786-P5-A07	-0.695935	0.910083	0	0	0.0488851	0	0	0.377967	0.365155	0.363538	0.40136	0
BT786-P5-A08	-0.617497	0.900672	0	0	0.0580838	0	0	0.496228	0.423078	0.37997	0	0
BT786-P5-A09	0.581636	0.485006	0	0.0213362	0.0566323	0	0	0.304948	0.554827	0	0	0
BT786-P5-B01	-0.476154	1.26729	0	0	0.0554961	0.0303551	0	0.328063	0.430812	0.342469	0.521998	0
BT786-P5-B02	-0.289476	0.367454	0	0	0.0362613	0.0336491	0	0.482593	0.549454	0	0	0
BT786-P5-B05	0.0153774	1.0158	0	0.0186527	0.0455012	0	0	0.594241	0.513762	0.305837	0.408609	0
BT786-P5-B06	0.193519	0.644985	0	0	0.0337513	0	0	0.290579	0.497884	0.37477	0	0
BT786-P5-B08	0.177311	0.632584	0	0	0.0701123	0	0	0.413233	0.470861	0	0.298074	0
BT786-P5-B11	-1.18144	0.985273	0	0	0.0763949	0	0	0.43673	0.426329	0	0.548035	0
BT786-P5-C03	-0.247706	0.0160726	0	0.0126603	0.0154945	0	0	0.114304	0.60861	0	0.226397	0.0552603
BT786-P5-C05	-0.220664	0.276288	0	0	0.0429266	0	0	0.517464	0.617519	0	0.0152492	0
BT786-P5-C07	1.44819	-0.162729	0	0	0.0430996	0	0	0.19224	0.519066	0	0	0
BT786-P5-C08	-1.26731	1.51163	0	0	0.0698073	0	0	0.313369	0.571504	0	0.0140724	0
BT786-P5-C09	-0.70221	0.63115	0	0.0148538	0.0690464	0	0	0.354781	0.455964	0	0.147541	0
BT786-P5-C10	-0.0624616	0.405445	0	0.0463845	0.115696	0	0	0.212841	0.418071	0	0.248006	0
BT786-P5-C11	-0.473702	0.646302	0.329216	0	0.0224559	0	0	0.729174	0.452667	0.148523	0.523728	0
BT786-P5-C12	-0.726165	1.06334	0.0532724	0.0145806	0.0304802	0	0	0.299353	0.612123	0	0.432743	0
BT786-P5-D01	-0.630778	0.456303	0	0	0	0	0	0.37541	0.550504	0	0.167328	0
BT786-P5-D04	-0.283146	0.996393	0	0	0.0756574	0	0	0.426501	0.501135	0	0.298749	0
BT786-P5-D06	-0.812748	0.75144	0.122899	0	0.0606394	0	0	0.566152	0.500302	0	0	0
BT786-P5-D07	-0.713427	1.37127	0	0	0.0528775	0	0	0.480332	0.378364	0.460863	0.607273	0
BT786-P5-D08	-0.682862	0.780413	0	0	0	0	0	0.107683	0.541903	0.361801	0.142937	0
BT786-P5-D09	-1.05114	0.704845	0	0.0205327	0.03103	0	0	0.271476	0.366341	0	0.111311	0
BT786-P5-D10	-0.494876	0.623013	0	0	0.0929743	0	0	0.418715	0.45374	0	0	0
BT786-P5-D12	0.271525	0.562465	0	0	0.0693514	0	0	0.414039	0.467223	0	0.403799	0
BT786-P5-E01	-0.270136	0.420886	0	0	0.0826407	0	0	0.467757	0.55364	0.414125	0.130527	0
BT786-P5-E04	-0.56902	0.0421857	0	0	0.0455012	0	0	0.30386	0.226151	0	0	0
BT786-P5-E05	0.994891	-0.0602655	0	0	0.0326663	0	0	0.339635	0.341748	0	0.370322	0
BT786-P5-E06	-0.660269	1.1119	0	0	0.0403212	0.299542	0	0.563468	0.5885	0	0.474386	0
BT786-P5-E09	-0.617616	0.685057	0	0	0.0284569	0	0	0.118906	0.580481	0	0.140818	0
BT786-P5-E10	0.918186	-0.0733439	0	0.0194603	0.0383888	0	0	0.50674	0.409299	0.465217	0.105983	0
BT786-P5-E11	-0.702544	0.549027	0.037081	0	0.0180339	0	0	0.381923	0.49501	0.247855	0.512863	0
BT786-P5-E12	-1.21987	0.584616	0	0	0.0344712	0	0	0.324941	0.32409	0	0.0829103	0
BT786-P5-F01	-0.738563	1.07865	0	0.0143071	0.122798	0	0	0.546965	0.564272	0	0.0637515	0
BT786-P5-F02	-0.897736	0.876794	0	0.01045	0.0371498	0	0	0.205084	0.598971	0	0.0133636	0
BT786-P5-F03	-0.334466	-0.298221	0	0	0	0	0	0.134028	0.0315056	0	0	0
BT786-P5-F04	-0.245783	0.246694	0	0.0173018	0.0722265	0	0	0.343337	0.54204	0	0	0
BT786-P5-F05	-0.169012	0.75632	0	0	0.00890538	0	0	0.363796	0.583047	0	0	0
BT786-P5-F07	0.107128	0.543316	0.195537	0.00989473	0.0485493	0	0	0	0.481013	0	0.189305	0
BT786-P5-F08	-0.829478	0.529602	0	0	0.0265993	0	0	0.298463	0.34128	0.0628013	0.169236	0
BT786-P5-F09	-0.180955	0.0524911	0	0	0.0254777	0	0.00349901	0.276534	0.547743	0	0.0889258	0
BT786-P5-G01	-0.960208	0.900132	0	0	0.0408446	0	0	0.549664	0.357569	0	0.342693	0
BT786-P5-G03	-0.781549	1.04269	0	0	0.0740226	0	0	0.0767209	0.540101	0	0.182315	0
BT786-P5-G05	-0.468843	1.22179	0	0.0224028	0.0485493	0	0	0.411043	0.340904	0.340028	0.182073	0
BT786-P5-G06	-0.567548	0.497347	0	0	0.0168654	0	0	0.395953	0.549317	0	0.266258	0
BT786-P5-G09	0.094179	0.697742	0.228136	0.0183829	0.0330284	0	0	0.422205	0.562948	0	0	0
BT786-P5-G10	0.126861	0.798469	0	0	0.0346515	0	0	0	0.516591	0	0.359786	0
BT786-P5-G11	-0.0937187	0.454193	0	0	0.0135191	0	0	0	0.507352	0	0	0
BT786-P5-G12	-0.194358	0.707558	0	0	0.0178404	0	0	0.0533232	0.542485	0	0.0121778	0
BT786-P5-H03	0.43027	0.505337	0	0	0.0411935	0	0	0.130513	0.594534	0	0	0
BT786-P5-H04	-0.849761	0.0279692	0	0	0.0962204	0	0	0	0.333375	0	0.17953	0
BT786-P5-H06	-0.900383	0.957435	0	0	0.0312119	0	0	0.365703	0.375432	0.328314	0	0
BT786-P5-H07	0.227221	0.548482	0.024026	0	0.0559843	0	0	0.385583	0.431337	0.544291	0.516254	0
BT786-P5-H08	-0.607133	0.453882	0	0.0118334	0.0472005	0	0	0.383675	0.586983	0	0	0
BT786-P5-H12	-0.170517	0.462398	0	0	0.0541912	0	0	0.300469	0.424481	0.244217	0.23375	0
BT786-P6-A01	0.188168	0.551803	0	0	0.0350107	0	0	0.439909	0.599849	0	0	0
BT786-P6-A02	-0.1583	0.415771	0	0	0.0569564	0	0	0	0.57034	0	0.185308	0
BT786-P6-A05	-0.758794	0.382927	0	0	0.0313937	0	0	0.265146	0.283037	0	0.474421	0
BT786-P6-A07	-0.733051	0.448003	0	0	0.0685875	0	0	0.384099	0.316949	0.133429	0.0885746	0
BT786-P6-A11	-0.30438	0.97809	0	0	0.0955475	0	0	0.462162	0.678134	0	0.242107	0
BT786-P6-A12	-1.10184	1.48566	0	0	0.0878706	0	0.004762	0	0.396569	0.320333	0.0602464	0
BT786-P6-B01	0.0190204	0.613607	0	0	0.204223	0	0	0.209732	0.640629	0	0.552326	0
BT786-P6-B04	-0.505518	0.677507	0	0	0.0279012	0	0	0.581313	0.489694	0.0991551	0	0
BT786-P6-B05	-0.251058	0.0403296	0.126616	0	0.0688939	0	0	0	0.544812	0	0.113856	0
BT786-P6-B07	-0.981229	0.537254	0	0.00682151	0.0222653	0	0	0.489926	0.485679	0	0.69478	0
BT786-P6-B09	0.255696	0.496626	0	0	0	0	0	0.452936	0.63837	0.313114	0	0
BT786-P6-C01	-0.674662	1.02683	0	0	0.0655071	0	0	0.367964	0.617918	0.299781	0	0
BT786-P6-C02	-0.643067	0.665367	0	0.0328535	0.0645731	0	0	0.603128	0.463629	0.146117	0.487431	0
BT786-P6-C03	-0.929151	0.9506	0.0870219	0	0.0451595	0	0	0.460693	0.345501	0.428092	0.180377	0
BT786-P6-C05	-0.760588	0.628369	0	0	0.118251	0	0	0	0.513226	0	0.4693	0
BT786-P6-D01	-0.117101	0.276773	0	0	0.0612742	0	0	0.208192	0.52388	0	0.384717	0
BT786-P6-D02	0.276599	0.709091	0	0	0.0681286	0	0	0.285012	0.641667	0	0.382571	0
BT786-P6-D04	-0.533147	0.197378	0.0483902	0	0.0711724	0	0	0.315714	0.655845	0	0	0
BT786-P6-D07	0.00753576	0.364554	0	0	0.0665906	0	0	0.319741	0.413531	0.333901	0.0164205	0
BT786-P6-D09	-0.972786	0.719006	0	0	0.0319405	0	0	0.702258	0.468283	0	0	0
BT786-P6-D10	-0.410391	0.716942	0	0.0250503	0.0803374	0	0	0.615915	0.593074	0	0.0105083	0
BT786-P6-E01	1.11911	-0.00739382	0	0.0129355	0.0235936	0	0	0.499887	0.624922	0	0.251951	0
BT786-P6-E05	-0.439598	0.735967	0	0.0213362	0.072077	0	0	0.454321	0.517435	0	0.0550959	0
BT786-P6-E06	-0.485083	0.8797	0	0	0.126435	0	0	0.497895	0.599918	0	0	0
BT786-P6-E07	-0.51158	0.252472	0	0	0.0313937	0	0	0.30256	0.491359	0	0.0649089	0
BT786-P6-E08	-0.445148	0.354118	0	0	0.0224559	0	0	0.266361	0.500542	0	0.10037	0
BT786-P6-E12	-0.218035	0.197023	0	0.0121093	0.0588858	0	0	0.0672714	0.600865	0	0.0685386	0
BT786-P6-F01	0.0835198	0.456036	0	0	0.0765429	0.017856	0	0.509961	0.593667	0	0.466964	0
BT786-P6-F02	-0.525847	0.878155	0	0.0112809	0.0373273	0	0	0.517124	0.484812	0	0	0
BT786-P6-F03	-0.273462	0.672553	0	0.0121093	0.0451595	0	0	0.542529	0.531089	0.453574	0	0
BT786-P6-F04	1.09776	-0.0175691	0	0	0.103865	0	0	0.230092	0.525363	0	0.0361828	0
BT786-P6-F06	-0.474085	0.150849	0	0	0.0394444	0	0	0.34824	0.46185	0	0	0
BT786-P6-G01	-0.230232	0.748636	0	0.018113	0.0849177	0	0	0.464819	0.70583	0.162127	0	0
BT786-P6-G02	-0.764306	0.506447	0	0.0145806	0.0517207	0	0.00539161	0.370465	0.432592	0	0.139678	0
BT786-P6-G03	-0.104113	0.662256	0	0.0159443	0.0850599	0	0	0.195476	0.41612	0.613189	0	0
BT786-P6-G04	-0.633001	0.507216	0	0	0.294979	0	0	0.323697	0.380839	0.415052	0	0
BT786-P6-G06	-0.464617	0.341872	0.0981684	0	0.0382128	0	0	0.554072	0.512177	0	0	0
BT786-P6-G09	-0.528152	0.824337	0	0	0.0630087	0.0619072	0	0.596996	0.553948	0.0877476	0	0
BT786-P6-G10	-1.09351	0.999659	0	0	0.0429266	0	0.00286563	0.242808	0.426888	0	0	0
BT786-P6-G11	-0.678987	1.00156	0	0	0.0639485	0	0	0.208347	0.597386	0	0.406498	0
BT786-P6-G12	-1.12866	0.764864	0	0	0.0647285	0	0	0	0.374269	0	0.32233	0
BT786-P6-H01	-0.281389	0.742784	0	0	0.0830689	0.0346534	0	0	0.422017	0	0.278905	0
BT786-P6-H02	0.233702	0.546706	0	0.0343886	0.0216935	0	0	0.217107	0.515245	0	0	0
BT786-P6-H06	-0.323736	0.276114	0	0	0	0	0	0.365505	0.322584	0	0.26695	0
BT786-P6-H08	-0.867062	0.0552589	0	0	0.0154945	0	0	0.0587431	0.272919	0.177819	0.238681	0
BT786-P6-H12	-0.462844	0.660033	0	0	0.0394444	0	0	0.507686	0.57342	0.538833	0	0
BT830-P2-A01	-1.64342	-1.66919	0.248947	0.0178429	0.112117	0	0	0.496185	0	0.714657	0.1277	0
BT830-P2-A02	-1.29219	-1.46938	0	0	0.0728277	0	0	0.376568	0	0.603294	0.346205	0
BT830-P2-A08	0.335664	-1.43469	0	0	0.66809	0	0	0	0	0	0	0
BT830-P2-B01	2.07601	-2.21423	0	0	0.0317587	0	0	0	0	0	0	0
BT830-P2-B05	-0.40809	-1.30153	0	0	0.0117257	0	0	0.177179	0	0.599104	0.436065	0
BT830-P2-B06	0.639599	-1.62206	0	0	0.511078	0	0	0	0	0	0.346257	0
BT830-P2-B09	-1.51319	-1.57903	0	0	0.210249	0	0	0.376144	0	0.61137	0.446134	0
BT830-P2-B10	-1.59396	-1.38631	0	0	0.0267855	0	0	0.297375	0	0.672215	0.438453	0
BT830-P2-C01	-1.14334	-1.4659	0	0	0.0228356	0	0	0.181319	0	0.543798	0.177834	0
BT830-P2-C02	0.777341	-1.43905	0	0	0.283719	0	0	0.195942	0	0	0.123475	0
BT830-P2-C03	1.80875	-1.91169	0	0	0	0	0	0	0	0	0	0
BT830-P2-C06	-0.189338	-1.45971	0	0	0.0525476	0	0	0.260653	0	0.218078	0.0774796	0
BT830-P2-C07	1.15442	-1.63068	0	0	0.0282722	0	0	0	0	0	0.114803	0
BT830-P2-C08	-1.67192	-1.61771	0	0.021069	0.0579226	0	0	0.497089	0	0.486403	0.637446	0
BT830-P2-C09	1.36402	-1.626	0	0	0.0532059	0	0	0	0	0	0.235307	0
BT830-P2-C10	0.292592	-1.02087	0	0	0.0893998	0	0	0.310586	0	0	0.300341	0
BT830-P2-C11	0.190184	-1.17385	0	0	0	0	0	0.177009	0	0	0.441878	0
BT830-P2-D01	-1.40215	-1.80961	0	0	0.0326663	0	0	0	0	0.472905	0.252314	0
BT830-P2-D03	0.518031	-1.30787	0	0.0253135	0.497413	0	0	0	0	0	0.472673	0
BT830-P2-D07	-0.917017	-1.36198	0.186233	0	0.050558	0	0.0119285	0	0	0.678096	0.416498	0
BT830-P2-D10	0.305343	-1.06271	0	0	0.0337513	0	0	0	0	0	0.0438366	0
BT830-P2-E01	-1.83341	-1.66519	0	0.00597759	0.0346515	0	0	0.39885	0	0.557378	0.0262729	0
BT830-P2-E02	0.770912	-1.04027	0.352539	0.827648	0.21173	0.0582359	0	0	0	0	0.529922	0
BT830-P2-E06	0.754658	-1.42731	0	0	0.443722	0	0	0	0	0	0.529022	0
BT830-P2-E08	1.51571	-1.5169	0	0	0.0812039	0	0	0	0	0	0.0668258	0
BT830-P2-E09	-0.0724053	-1.19542	0	0	0.138863	0	0	0	0	0	0.480978	0
BT830-P2-E11	-1.80413	-1.75925	0	0	0.0588858	0	0	0.674508	0	0.622731	0.704244	0
BT830-P2-E12	0.780172	-1.35076	0	0.00794274	0.187817	0	0	0.0391927	0	0.247855	0	0
BT830-P2-F01	2.28983	-2.21892	0	0	0.121968	0	0	0	0	0	0	0
BT830-P2-F02	0.724282	-1.19255	0.184858	0	0.0424075	0	0	0	0	0	0.100202	0
BT830-P2-F03	1.19859	-1.52118	0	0	0.264571	0	0	0	0	0	0	0
BT830-P2-F04	1.04242	-1.95688	0	0	0.595398	0	0	0	0	0	0.164632	0
BT830-P2-F05	1.32024	-1.56383	0	0	0.158244	0	0	0	0	0	0.256362	0
BT830-P2-F07	2.30412	-2.22299	0	0	0.512471	0	0	0	0	0	0	0
BT830-P2-F11	-1.88097	-1.82229	0.335138	0	0	0	0	0	0	0.60502	0.151108	0
BT830-P2-G02	0.629353	-1.41688	0	0	0.565942	0	0	0	0	0	0.129489	0
BT830-P2-G03	0.947414	-1.36903	0.305893	0	0.116185	0	0	0	0	0	0.0210515	0
BT830-P2-G04	-0.404438	-1.39805	0	0	0.46872	0	0	0	0	0	0	0
BT830-P2-G05	1.24821	-1.55561	0	0	0.441845	0	0	0	0	0	0	0
BT830-P2-G06	0.906015	-1.4553	0	0	0.0702633	0	0	0	0	0	0.251484	0
BT830-P2-G07	-1.23244	-1.33493	0	0	0	0	0	0.204561	0	0.679974	0	0
BT830-P2-G08	1.24137	-1.81429	0	0	0.028086	0	0	0	0	0	0	0
BT830-P2-G09	0.520363	-1.30468	0	0	0.532279	0	0	0	0	0	0	0
BT830-P2-H03	1.12939	-1.81252	0	0	0.63494	0	0	0	0	0	0	0
BT830-P2-H04	0.425613	-1.1363	0	0	0.316019	0	0	0	0	0	0.232176	0
BT830-P2-H06	0.712062	-1.42822	0	0	0.39009	0	0	0	0	0	0.0717427	0
BT830-P2-H07	0.792446	-1.51996	0	0	0.102956	0	0	0	0	0	0.212522	0
BT830-P2-H11	0.340773	-1.50206	0	0.0143071	0.309509	0	0	0	0	0	0.0228802	0
BT830-P2-H12	0.408069	-1.04862	0	0.0507566	0.39723	0	0	0.0232833	0	0	0.0542949	0
BT830-P3-A04	1.22022	-1.36865	0	0.0189222	0.490698	0	0	0	0	0	0	0
BT830-P3-A05	1.55165	-1.86471	0.100031	0	0.246757	0	0	0	0	0	0.123778	0
BT830-P3-A06	-1.79589	-1.76806	0	0.0148538	0.0878706	0	0	0.0947835	0	0	0.0121778	0
BT830-P3-A07	1.36135	-1.63495	0	0	0.65164	0	0	0	0	0	0	0
BT830-P3-A08	0.918343	-1.31441	0	0.467872	0.447915	0	0.0069601	0	0	0	0.142937	0
BT830-P3-A09	0.86378	-1.80108	0.196688	0.0381906	0.292281	0	0	0.194854	0	0	0.251674	0
BT830-P3-A12	-1.45332	-1.55705	0.421048	0	0.0983566	0	0	0.211399	0	0.535242	0.507275	0
BT830-P3-B01	1.17301	-1.70056	0	0	0.13274	0	0	0	0	0	0.0496324	0
BT830-P3-B03	1.197	-1.61721	0.224305	0	0.632565	0	0	0	0	0	0.233058	0
BT830-P3-B05	0.982075	-1.32486	0	0.0943021	0.625894	0	0	0	0	0	0.146432	0
BT830-P3-B06	-0.634489	-1.32783	0	0.0502741	0	0	0	0.293828	0	0.544784	0.183042	0
BT830-P3-B07	-1.39361	-1.74421	0	0	0.0830689	0	0	0.459563	0	0.531932	0.18171	0
BT830-P3-B08	0.687692	-1.27285	0	0	0.317778	0	0	0	0	0	0.0307261	0
BT830-P3-B09	-1.91814	-1.62251	0	0	0	0	0	0.34068	0	0.529948	0.509714	0
BT830-P3-C01	-1.38807	-1.6252	0	0.0183829	0.0615909	0	0	0.16466	0	0.475757	0.157032	0.147399
BT830-P3-C02	0.436452	-1.15114	0	0	0.345122	0	0	0	0	0	0	0
BT830-P3-C03	-1.40642	-1.54529	0	0	0.0566323	0	0	0.26071	0	0.597179	0.636287	0
BT830-P3-C06	-1.59526	-1.74047	0	0	0	0	0	0.22543	0	0.491262	0.221103	0
BT830-P3-C07	-1.64748	-1.68494	0	0	0.0339316	0	0	0.414886	0.0295915	0.602226	0.625923	0
BT830-P3-C09	1.26236	-1.65784	0	0	0.50599	0	0	0	0	0	0	0
BT830-P3-C10	-1.01865	-1.37599	0	0	0.0780106	0	0	0.0578247	0	0.606416	0.344631	0
BT830-P3-C11	1.73288	-1.84834	0	0	0.658414	0	0	0	0	0	0	0
BT830-P3-C12	-0.920024	-1.35014	0	0	0.0342923	0	0	0	0	0.442647	0	0
BT830-P3-D03	0.972535	-1.58138	0	0.0226679	0.444792	0	0	0.054575	0	0	0.304856	0
BT830-P3-D04	0.746006	-1.47891	0	0	0.521722	0	0	0	0	0	0.388644	0
BT830-P3-D06	0.33788	-1.27755	0	0	0.322939	0	0	0	0	0	0	0
BT830-P3-D07	0.834793	-1.46635	0	0	0.452197	0	0	0	0	0	0.0434179	0
BT830-P3-D08	0.628399	-1.14976	0	0	0.548055	0	0	0	0	0	0	0
BT830-P3-D09	-1.02111	-1.48155	0	0	0.0655071	0	0	0.19508	0	0.472307	0.240117	0
BT830-P3-D11	0.557874	-1.55686	0.262461	0	0	0	0	0.372146	0	0	0.0494282	0
BT830-P3-D12	0.603202	-1.20499	0	0	0.071775	0	0	0	0	0	0.117155	0
BT830-P3-E01	0.157675	-1.29527	0	1	0.447945	0	0	0	0	0	0.0500407	0
BT830-P3-E03	-0.383601	-1.23397	0	0	0.0145089	0	0	0.147705	0	0.305673	0	0
BT830-P3-E04	-1.15422	-1.23229	0	0	0.114715	0	0	0	0	0.0625666	0	0
BT830-P3-E05	-0.413599	-1.47045	0	0	0.193813	0	0	0	0	0	0	0
BT830-P3-E06	0.796669	-1.43083	0	0	0.418914	0	0	0	0	0	0.102695	0
BT830-P3-E07	0.512868	-1.23948	0	0	0.184738	0	0	0	0	0	0.206259	0
BT830-P3-E08	0.632944	-1.48316	0	0	0.504788	0	0	0	0	0	0.307348	0
BT830-P3-E10	0.170975	-0.997517	0	0	0.359637	0	0	0.23799	0	0	0.092052	0
BT830-P3-E12	1.38706	-1.80469	0	0	0.281827	0	0	0	0	0	0	0
BT830-P3-F01	0.557459	-1.50977	0	0	0.065661	0	0	0	0	0	0.326482	0
BT830-P3-F03	-1.61624	-1.49696	0	0	0.0956823	0	0	0.705536	0	0.682333	0	0
BT830-P3-F04	0.725961	-1.6511	0	0.0178429	0.153171	0.019978	0	0	0	0	0.217366	0
BT830-P3-F07	-0.40359	-1.35859	0.12877	0	0.396423	0	0	0.051906	0	0.20451	0.209079	0
BT830-P3-F08	0.865678	-1.4026	0	0	0.540372	0	0	0	0	0	0.342693	0
BT830-P3-F10	0.691438	-1.18049	0	0	0.464762	0	0	0	0	0	0	0
BT830-P3-F12	-0.779813	-1.49228	0	0	0.051555	0	0	0.25089	0	0	0.0668258	0
BT830-P3-G01	0.569988	-1.55323	0	0	0.427404	0	0	0	0	0	0.176225	0
BT830-P3-G03	-0.154454	-1.10239	0	0	0.0383888	0	0	0.309512	0	0	0.414647	0
BT830-P3-G04	0.791927	-1.3816	0	0	0.22579	0	0	0	0	0	0.132884	0
BT830-P3-G05	-1.21434	-1.45681	0	0	0.0330284	0	0	0.161185	0	0.591545	0	0
BT830-P3-G06	-0.396358	-1.45064	0.22133	0	0.246698	0	0	0.0498418	0	0	0.0112252	0
BT830-P3-G07	-0.262959	-0.926588	0	0	0.46051	0	0	0	0	0	0.160468	0
BT830-P3-G08	0.574134	-1.35533	0	0	0.267386	0	0	0.0467856	0	0	0.241449	0
BT830-P3-G10	-0.553042	-1.26989	0	0	0.571763	0	0	0.0808749	0	0.252762	0.490078	0
BT830-P3-G11	-1.42261	-1.26951	0	0	0.0541912	0	0	0.292288	0	0.574104	0.136954	0
BT830-P3-H02	0.746465	-1.3672	0	0	0.0925653	0	0	0	0	0	0.0461307	0
BT830-P3-H03	0.710077	-1.48236	0	0	0.454337	0	0	0	0	0	0.231086	0
BT830-P3-H05	1.58583	-1.99508	0	0	0.157232	0	0	0	0	0	0.0843394	0
BT830-P3-H06	0.927468	-1.9767	0.343361	0	0.0308468	0	0.156658	0.0951679	0	0	0.0859362	0
BT830-P3-H07	-0.421876	-1.46461	0	0	0.417448	0	0	0	0	0	0	0
BT830-P3-H08	0.837354	-1.41705	0	0.00766283	0.561808	0	0	0	0	0	0	0
BT830-P3-H09	0.698662	-1.39313	0	0.0140332	0.381307	0	0	0	0	0	0.370322	0
BT830-P3-H10	1.76925	-1.34283	0	0	0.0235936	0	0	0	0.20384	0	0.13215	0
BT830-P3-H11	0.761797	-1.37387	0	0	0.503307	0	0	0	0	0	0.0702393	0
BT830-P3-H12	0.948217	-1.66382	0	0	0.290258	0	0	0	0	0	0.154625	0
BT830-P4-A01	0.320641	-1.18887	0	0	0.113357	0	0	0.267577	0	0	0.0150143	0
BT830-P4-A02	0.577824	-1.47563	0	0	0.151016	0	0	0	0	0	0.304787	0
BT830-P4-A04	0.258584	-1.17835	0	0.00484858	0.339844	0	0	0	0	0	0	0
BT830-P4-A05	-1.46905	-1.32404	0	0.0750194	0.128981	0	0	0.286425	0	0.688413	0.514368	0
BT830-P4-A06	0.775908	-1.27817	0	0	0.258677	0	0	0	0	0	0.387744	0
BT830-P4-A08	1.05049	-1.94713	0	0.0143071	0.0756574	0	0	0.395812	0	0	0.192799	0
BT830-P4-A12	0.138708	-1.30598	0	0.0028619	0.0230248	0	0	0.471812	0	0	0.172258	0
BT830-P4-B01	1.21277	-1.84793	0	0	0	0	0	0	0	0	0	0
BT830-P4-B03	0.80525	-1.7163	0	0	0.666067	0	0	0	0	0	0.0889258	0
BT830-P4-B04	-0.00843045	-0.728466	0	0	0.0780106	0	0	0	0	0	0	0
BT830-P4-B07	-0.0842371	-0.75223	0	0	0.136877	0	0	0	0	0	0.0852269	0
BT830-P4-B08	1.84746	-1.75364	0	0	0.0819238	0	0	0	0	0	0	0
BT830-P4-B09	0.651222	-1.16803	0	0	0.102044	0	0	0	0	0	0.0941143	0
BT830-P4-B11	1.53922	-1.57035	0	0	0.278675	0	0	0.323033	0	0	0	0
BT830-P4-B12	-0.0348732	-0.867176	0	0	0	0	0	0	0	0	0	0
BT830-P4-C05	0.43018	-1.27627	0	0.0451584	0.174709	0	0	0	0	0.047652	0.433366	0
BT830-P4-C06	1.4489	-1.83207	0	0	0.169445	0	0	0	0	0	0.0383332	0
BT830-P4-C08	-0.301315	-1.66108	0	0	0.0373273	0	0	0	0	0.195261	0.0892753	0
BT830-P4-C09	0.574166	-0.978099	0	0	0.284041	0	0	0	0	0	0.49596	0
BT830-P4-C11	0.0443725	-1.38931	0	0	0.763655	0	0	0	0	0.414606	0.10987	0
BT830-P4-D01	0.316668	-1.22932	0	0	0.505052	0	0	0	0	0	0	0
BT830-P4-D03	0.804638	-1.50915	0	0.0653302	0.568009	0	0	0	0	0	0.0538918	0
BT830-P4-D04	0.583714	-1.53497	0	0	0.584841	0	0	0	0	0	0.033579	0
BT830-P4-D06	0.150086	-1.11639	0	0	0.510814	0	0	0	0	0	0.203405	0
BT830-P4-D10	0.23924	-1.75065	0	0	0.28366	0	0.0402198	0	0	0	0.0761959	0
BT830-P4-D11	-0.991041	-1.49643	0	0	0.0444748	0	0	0.269865	0	0.473246	0.383332	0
BT830-P4-E02	-0.271194	-1.05049	0	0	0.0994167	0	0	0	0	0	0	0
BT830-P4-E03	0.58941	-1.27263	0	0	0.534786	0	0	0	0	0	0.166047	0
BT830-P4-E04	0.46228	-1.34337	0	0	0.17078	0	0	0	0	0	0.585042	0
BT830-P4-E05	0.664327	-0.969311	0	0	0.577877	0	0	0	0	0	0.0899725	0
BT830-P4-E07	1.36915	-1.73455	0	0	0.0699598	0	0	0	0	0	0	0
BT830-P4-E08	-1.08474	-1.60534	0	0	0.0708689	0	0	0.332825	0	0.468351	0.158359	0
BT830-P4-E09	0.973081	-1.49155	0	0	0.589533	0	0	0	0	0	0.226795	0
BT830-P4-E11	0.111447	-1.38322	0	0	0.635527	0	0	0	0	0	0	0
BT830-P4-E12	-0.263077	-1.41495	0.105153	0	0.232593	0	0	0	0	0	0.159151	0
BT830-P4-F01	0.204808	-1.47814	0.33598	0	0.400881	0	0	0.127046	0	0	0.0743499	0
BT830-P4-F02	0.286062	-1.01239	0	0	0.102436	0	0	0	0	0.374606	0	0
BT830-P4-F03	0.519682	-1.41745	0.353044	0	0.44554	0	0	0	0	0	0.373246	0
BT830-P4-F04	0.5957	-1.31222	0	0	0	0	0	0	0	0	0	0
BT830-P4-F05	0.971959	-1.33066	0	0	0.22557	0	0	0	0	0	0.646269	0
BT830-P4-F07	0.368774	-1.20776	0	0.0429375	0.443341	0	0	0	0.0134258	0.135882	0	0
BT830-P4-F08	0.681393	-1.277	0	0	0.583316	0	0	0	0	0	0.133908	0
BT830-P4-F09	-1.35332	-1.29791	0	0	0.0958172	0	0	0	0	0.399019	0.545959	0
BT830-P4-G01	0.402797	-1.2429	0	0	0.091058	0	0	0	0	0	0.00858653	0
BT830-P4-G02	-1.20658	-1.07393	0	0	0.079468	0	0	0.328883	0	0.614316	0.544541	0
BT830-P4-G03	-1.18938	-1.66097	0	0.0574294	0.0675143	0	0	0.12374	0	0.644398	0.574765	0
BT830-P4-G07	1.02577	-1.32619	0	0	0.607713	0	0	0	0	0	0.618657	0
BT830-P4-G10	1.30777	-1.67756	0	0	0.0905068	0	0	0	0	0	0.471238	0
BT830-P4-G12	1.13536	-1.43785	0	0	0.0387421	0	0	0	0	0	0.533295	0
BT830-P4-H01	1.11488	-1.61994	0	0.0289779	0.48671	0	0	0	0	0	0.0823723	0
BT830-P4-H02	1.23144	-1.67771	0	0	0.36037	0	0	0	0	0	0	0
BT830-P4-H03	1.38953	-1.80721	0	0.55655	0.124683	0	0.124306	0.182081	0	0	0.183388	0
BT830-P4-H07	0.557632	-1.15378	0	0	0.264439	0	0	0	0	0	0.0892753	0
BT830-P4-H10	1.04271	-1.3945	0	0	0.162203	0	0	0	0	0	0	0
BT830-P4-H11	0.640078	-1.52685	0	0	0.296958	0	0	0.109	0	0	0.195083	0
BT830-P5-A02	0.152992	-0.881951	0	0	0.0446464	0	0	0	0	0	0.368558	0
BT830-P5-A03	0.627504	-1.37746	0	0	0.293396	0	0	0	0	0	0	0
BT830-P5-A04	0.67466	-1.31211	0	0	0.330827	0	0	0	0	0	0.507465	0
BT830-P5-A05	-0.674115	-1.637	0	0	0.0404957	0	0	0	0	0.525324	0.179772	0
BT830-P5-A06	0.795821	-1.38018	0	0	0.501577	0	0	0	0	0	0.187557	0
BT830-P5-A08	2.41826	-2.02802	0.729158	0	0.10126	0	0	0	0	0	0	0
BT830-P5-B01	-1.64673	-1.5421	0	0.0310513	0.0566323	0	0	0.586498	0	0.455323	0.523728	0
BT830-P5-B05	1.13152	-1.54809	0.290204	0	0.52593	0	0	0	0	0	0	0
BT830-P5-B06	-0.679879	-1.26644	0	0	0.0216935	0	0	0	0	0	0.0280635	0
BT830-P5-B07	1.03863	-1.60868	0	0	0.686403	0	0.155481	0	0	0	0.224166	0
BT830-P5-B09	-0.853529	-1.32302	0	0	0.422096	0	0	0	0	0.163617	0.414889	0
BT830-P5-B10	0.369204	-1.16281	0	0	0.484863	0	0	0	0	0	0.21337	0
BT830-P5-B12	-0.167479	-1.17569	0	0	0.490903	0	0	0	0	0.154685	0.017818	0
BT830-P5-C02	-1.54465	-1.51504	0	0	0.0456712	0	0	0.400348	0.0272383	0.471485	0.106797	0
BT830-P5-C08	0.777027	-1.59319	0	0	0.638576	0	0	0	0	0	0.0816543	0
BT830-P5-C09	1.17843	-1.56911	0.360959	0	0.278455	0	0	0	0	0	0.374855	0
BT830-P5-C10	0.518392	-1.43955	0	0	0.29907	0	0	0	0	0	0	0
BT830-P5-D01	1.41199	-1.58768	0.0991633	0	0.688485	0	0	0	0	0	0	0
BT830-P5-D03	-1.5636	-1.60192	0.0189278	0	0.0856244	0	0	0.214197	0.011441	0.410956	0.599834	0
BT830-P5-D09	1.8927	-2.0328	0	0	0.584049	0	0	0	0.0137281	0	0	0
BT830-P5-D10	0.601245	-1.454	0	0	0	0	0	0	0	0	0.350842	0
BT830-P5-D12	1.76741	-1.80893	0	0	0.124331	0	0	0	0	0	0.720057	0
BT830-P5-E01	1.074	-1.40631	0	0	0.528291	0	0	0	0	0	0	0
BT830-P5-E02	0.205866	-1.20754	0	0	0.471975	0	0	0	0	0	0	0
BT830-P5-E05	0.484372	-1.07943	0	0	0	0	0	0	0	0	0.347139	0
BT830-P5-E08	1.24462	-1.66171	0	0	0.57666	0	0	0	0	0	0	0
BT830-P5-E09	0.701626	-1.2988	0	0.0315676	0.134763	0	0	0	0	0	0	0
BT830-P5-E10	2.11758	-1.89725	0.13069	0.134464	0.60981	0	0	0	0	0	0	0
BT830-P5-E11	2.23954	-2.18586	0	0	0.459439	0	0	0	0	0	0.436636	0
BT830-P5-E12	1.04797	-1.51098	0	0	0.264996	0	0	0	0	0	0	0
BT830-P5-F01	0.251336	-1.19276	0	0	0.602728	0	0	0.0153103	0	0	0.423764	0
BT830-P5-F02	1.50118	-2.01402	0.27081	0	0.51467	0	0	0	0	0	0.186848	0
BT830-P5-F03	-1.02373	-1.4221	0.170025	0	0.341149	0	0.0192395	0.45141	0.00293588	0.518058	0.131413	0
BT830-P5-F05	-1.67835	-1.46178	0	0	0.392685	0	0	0.356025	0	0.66691	0	0
BT830-P5-F06	-1.53012	-1.51133	0	0	0.0619062	0	0	0.448443	0	0.594632	0	0
BT830-P5-F08	0.989165	-1.68322	0	0	0.0743217	0	0	0	0	0	0.228508	0
BT830-P5-G02	1.27599	-1.61376	0	0.0526805	0.0622214	0	0	0	0	0	0.0803913	0
BT830-P5-G03	-0.304638	-1.19014	0	0.0173018	0.20868	0	0	0	0	0	0.0143082	0
BT830-P5-G04	0.541505	-1.02134	0.126724	0	0.718468	0	0	0	0	0	0.113064	0
BT830-P5-G07	0.688319	-1.26221	0	0	0.0403212	0	0	0	0	0	0.0522776	0
BT830-P5-G08	0.752589	-1.36767	0	0	0.292017	0	0	0	0	0	0	0
BT830-P5-G10	0.275263	-1.0525	0	0.517654	0.564285	0	0	0	0	0	0.169236	0
BT830-P5-G11	-0.664681	-1.10132	0	0	0.527954	0	0	0	0	0	0	0
BT830-P5-G12	-1.33785	-1.48992	0.288211	0	0.102566	0	0	0.106598	0	0.318643	0.13156	0
BT830-P5-H01	-1.81201	-1.65054	0	0.0242589	0.277708	0	0	0.683226	0	0.607402	0.67293	0
BT830-P5-H04	-1.20536	-1.22189	0	0.0110042	0.041714	0	0	0	0	0.482518	0	0
BT830-P5-H06	1.28478	-1.5042	0	0	0.0475377	0	0	0	0	0	0	0
BT830-P5-H07	0.30637	-1.61452	0	0	0.0346515	0	0	0	0	0	0.206692	0
BT830-P5-H09	-0.402053	-1.5942	0	0	0.256477	0	0	0.426727	0	0.351777	0.0488123	0
BT830-P5-H11	1.47766	-1.87579	0	0	0.318848	0	0.0186365	0	0	0	0	0
BT920-P1-A07	1.5178	-1.01977	0	0.0379394	0.0817801	0	0.513999	0	0.521165	0	0.0161866	0
BT920-P1-A09	0.866454	-0.38533	0	0.0419446	0.0508908	0	0.274768	0	0.520652	0	0.658864	0
BT920-P1-B01	0.488553	-0.719932	0	0	0.106566	0	0.229897	0	0.390478	0	0	0
BT920-P1-B02	-0.722945	-0.969581	0	0	0.128635	0	0	0	0.300786	0	0.262279	0
BT920-P1-B04	1.09923	0.583444	0	0.0239937	0.0593653	0	0	0	0.508253	0.422529	0	0
BT920-P1-B05	1.29559	-1.07706	0.391607	0	0.0614326	0	0	0	0.36585	0	0	0
BT920-P1-B08	0.514613	-0.628055	0	0.0389462	0.0528775	0	0	0	0.336512	0	0	0
BT920-P1-B09	1.44664	-0.272737	0	0.018113	0.0690464	0	0.00727291	0	0.538971	0	0	0
BT920-P1-B10	0.87063	0.858127	0	0	0	0	0	0	0.45974	0	0.820055	0
BT920-P1-B11	1.02314	-0.839525	0	0	0.0176454	0	0	0	0.402363	0	0	0
BT920-P1-B12	2.14497	2.18257	0	0	0.03103	0	0	0	0.588146	0	0	0
BT920-P1-C06	1.64608	-1.13919	0.16959	0	0.0619062	0	0	0	0.495831	0	0.146155	0
BT920-P1-C08	-1.22913	-1.78097	0	0	0.0293791	0	0	0	0.0650712	0	0.172758	0
BT920-P1-C09	1.05507	-1.14945	0	0	0.0103202	0	0	0	0.500861	0	0.0723032	0
BT920-P1-C10	1.25823	0.114554	0	0	0.106182	0	0	0	0.533028	0	0.026721	0
BT920-P1-C11	0.538221	-1.23597	0	0	0.0195822	0	0	0	0	0	0.14039	0
BT920-P1-D01	0.531284	0.733032	0	0	0.0860467	0	0	0	0.416873	0	0	0
BT920-P1-D03	0.498726	-1.16382	0	0	0.0979578	0	0	0	0.144136	0	0.584765	0
BT920-P1-D04	1.33552	-1.07587	0	0	0.0279012	0	0	0	0.31947	0	0.0704278	0
BT920-P1-D05	1.42054	1.41252	0	0	0.0852007	0	0	0	0.604367	0	0	0
BT920-P1-D08	1.12444	-0.117077	0	0	0	0	0	0	0.461975	0	0	0
BT920-P1-D09	-0.173391	-1.15423	0	0	0.050558	0	0	0	0.0822111	0	0.545856	0
BT920-P1-D11	1.44178	-1.3548	0.256104	0	0.0850599	0	0.0806991	0	0.422029	0	0	0
BT920-P1-E02	0.521262	-1.04736	0	0	0.0695039	0	0	0	0.0899164	0	0	0
BT920-P1-E04	-0.197654	-0.264581	0	0.0287187	0.0346515	0	0	0	0.554177	0	0.549229	0
BT920-P1-E05	1.95078	1.43566	0	0	0.0944684	0	0	0	0.621557	0	0	0
BT920-P1-E06	0.980833	0.657004	0	0.0255767	0.0182289	0	0	0	0.321569	0	0.0210515	0
BT920-P1-E07	1.1959	-1.23973	0	0.0216033	0.065661	0	0.243931	0	0.451139	0	0.194979	0
BT920-P1-E12	2.13905	1.5129	0	0	0.0456712	0	0	0	0.534511	0	0	0
BT920-P1-F02	0.284523	-0.314911	0	0	0	0	0	0	0.573523	0.211259	0	0
BT920-P1-F03	1.39075	-0.654606	0	0	0.266799	0	0	0	0	0	0	0
BT920-P1-F06	1.15826	-1.0024	0	0	0.0574402	0	0	0	0.410576	0	0.145876	0
BT920-P1-F07	0.263614	-0.270567	0	0	0.039094	0	0	0	0.221338	0	0.483296	0
BT920-P1-F08	1.30534	-0.455047	0	0	0	0	0	0	0.598275	0	0	0
BT920-P1-F10	1.2662	-0.74877	0	0.0763452	0.163287	0	0.0330901	0	0.62661	0	0.191294	0
BT920-P1-F11	1.08409	-0.308028	0	0	0.0944684	0	0	0	0.364219	0	0	0
BT920-P1-F12	1.44635	-1.10594	0.307493	0	0.0903689	0	0	0	0.348364	0	0	0
BT920-P1-G02	1.85452	1.71108	0	0	0	0	0	0.191845	0.640515	0	0.180014	0
BT920-P1-G03	0.641141	-0.854104	0	0	0.0844925	0	0	0	0.195227	0	0.0374751	0
BT920-P1-G04	0.775305	-1.24645	0	0	0.0895391	0	0	0	0.307904	0	0.0136001	0
BT920-P1-G05	1.36616	-0.393065	0	0	0.0561456	0	0	0	0.451572	0	0.11227	0
BT920-P1-G06	2.35975	2.29257	0	0.0224028	0.0397963	0	0	0	0.698347	0	0	0
BT920-P1-G09	-1.4925	1.29841	0	0	0.0168654	0	0	0.255948	0.441386	0	0	0
BT920-P1-G11	0.651014	-0.793706	0	0	0.0607992	0	0	0	0	0	0	0
BT920-P1-G12	1.30214	-1.02327	0	0.021069	0.0256653	0	0	0	0.463436	0	0	0
BT920-P1-H01	0.890514	-0.603192	0	0	0	0	0.469483	0	0.463002	0	0	0
BT920-P1-H04	1.44058	-0.642068	0	0	0.015298	0	0	0	0.250562	0	0.350582	0
BT920-P1-H05	0.618307	-1.12337	0	0	0	0	0	0	0.491667	0	0	0
BT920-P1-H06	1.63855	-1.33317	0	0	0.168888	0	0	0	0.368725	0	0	0
BT920-P1-H07	1.31552	-1.11625	0	0	0	0	0	0	0.398075	0	0	0
BT920-P1-H09	0.955704	-0.71917	0	0	0.0164754	0	0	0	0.408295	0	0.0413124	0
BT920-P2-A02	1.27602	-1.04263	0.158237	0	0	0	0	0.321267	0.511629	0	0	0
BT920-P2-A03	1.30773	1.2062	0	0	0.0853414	0	0	0	0.589173	0	0	0
BT920-P2-A04	-1.14898	1.24833	0	0	0	0	0	0.594114	0.0524063	0.315251	0.708915	0
BT920-P2-A05	0.899464	-0.996334	0	0	0	0	0	0	0.108716	0	0.605163	0
BT920-P2-A06	2.1869	2.12306	0	0	0.416305	0	0	0	0.842153	0	0	0
BT920-P2-A07	0.732136	-1.22745	0	0	0.131494	0	0	0	0.425976	0	0.358073	0
BT920-P2-A08	1.03995	-1.20594	0	0	0.0935183	0	0.335757	0	0.568994	0	0	0
BT920-P2-A10	0.93232	0.774928	0	0.0449112	0.123034	0	0	0	0.433333	0.182326	0.0976834	0
BT920-P2-A12	2.24604	-1.29861	0	0	0.0974242	0	0	0	0.700469	0	0	0
BT920-P2-B02	2.1907	1.95941	0	0	0	0	0	0	0.674997	0	0	0
BT920-P2-B03	1.49387	-1.08485	0	0	0.114715	0	0	0	0.457333	0	0.413695	0
BT920-P2-B04	1.14355	-1.00736	0	0	0.0726781	0	0	0	0.552466	0	0.227799	0
BT920-P2-B06	-0.0123189	-0.59559	0	0	0	0	0	0	0.487253	0	0.0798481	0
BT920-P2-B08	0.843985	-0.674262	0	0	0	0	0	0	0.466572	0	0.752219	0
BT920-P2-B09	1.77581	-1.45661	0	0	0	0	0	0	0.443074	0	0	0
BT920-P2-B10	1.39448	-0.943542	0.51768	0	0.0180339	0	0	0	0.258683	0	0	0
BT920-P2-B11	1.06448	-1.28733	0	0	0	0	0.0698316	0	0.33228	0	0	0
BT920-P2-B12	2.02446	1.87629	0	0	0	0	0	0	0.60529	0	0	0
BT920-P2-C02	-0.423675	-1.04722	0	0	0	0	0	0	0.44636	0	0.594626	0
BT920-P2-C03	1.27239	-1.14468	0	0	0.0406701	0	0	0	0.531397	0	0.0530873	0
BT920-P2-C04	1.40978	0.359032	0	0	0.051555	0	0	0	0.501534	0	0	0
BT920-P2-C06	0.358235	-1.46037	0	0	0	0	0	0	0.210068	0	0.70997	0
BT920-P2-C08	1.16496	0.183946	0	0	0.0538627	0	0	0.455592	0.32709	0	0	0
BT920-P2-C09	1.30456	-1.05962	0	0	0.0387421	0	0	0	0.476531	0	0	0
BT920-P2-C11	2.08562	1.93204	0	0	0.127365	0	0	0	0.647587	0	0	0
BT920-P2-C12	1.81413	-1.25876	0.0929916	0	0	0	0	0	0.58404	0	0	0
BT920-P2-D02	0.847127	-1.14195	0	0	0	0	0	0.137692	0.379664	0	0	0
BT920-P2-D04	1.80697	-1.36059	0	0	0.0849177	0	0	0	0.591956	0	0	0
BT920-P2-D06	0.902982	0.53926	0	0	0.0688939	0	0	0	0.556606	0.364817	0.413695	0
BT920-P2-D07	1.64619	-1.36454	0	0	0.0633225	0	0	0	0.400652	0	0.234131	0
BT920-P2-D09	1.72345	1.56381	0	0	0.110366	0	0	0	0.634355	0	0.102033	0
BT920-P2-D10	2.04871	1.90782	0	0	0.153992	0	0	0	0.663112	0	0	0
BT920-P2-D11	0.390875	-0.759502	0	0	0	0	0	0	0.552808	0	0	0
BT920-P2-D12	1.26234	-0.818176	0.292604	0	0.0366176	0	0.156658	0	0.528123	0	0	0
BT920-P2-E02	0.907108	0.607869	0	0	0	0	0.264304	0	0.434371	0	0	0
BT920-P2-E03	0.690054	-1.12144	0.230423	0	0.101653	0	0	0	0.455987	0	0.0737928	0
BT920-P2-E04	1.12775	0.253186	0	0	0	0	0	0	0.44774	0	0	0
BT920-P2-E05	0.787593	-1.44267	0.53814	0	0.143421	0	0.076447	0	0.382846	0	0	0
BT920-P2-E06	1.76864	1.76379	0	0.0691999	0.152863	0	0	0	0.564762	0	0.491722	0
BT920-P2-E07	0.506607	-0.75331	0	0	0	0	0	0	0.421036	0	0.618276	0
BT920-P2-E08	0.328387	0.326829	0	0	0	0	0	0	0.481196	0	0.653916	0
BT920-P2-E09	1.7777	1.92637	0	0	0.0434441	0	0	0	0.622332	0	0	0
BT920-P2-E10	1.59422	-1.05004	0	0	0.0288264	0	0.0591127	0	0.508755	0	0.0702393	0
BT920-P2-E11	1.5197	-1.30314	0.391747	0	0.0284569	0	0	0	0.45593	0	0.147125	0
BT920-P2-E12	0.960122	-0.660799	0	0	0.0540269	0	0	0	0.473804	0	0	0
BT920-P2-F02	1.96562	2.05961	0	0	0	0	0	0	0.610937	0	0	0
BT920-P2-F03	0.0198302	-0.814067	0	0	0.125152	0	0	0	0.418025	0.330544	0	0
BT920-P2-F04	0.787687	-0.79231	0	0	0.0785941	0	0	0	0.252353	0	0	0
BT920-P2-F05	1.71682	-1.3692	0	0	0	0	0	0	0.510454	0	0	0
BT920-P2-F06	-0.758055	-1.51244	0	0	0	0	0	0	0.409253	0	0	0
BT920-P2-F07	0.794753	-1.25143	0	0	0	0	0	0	0.353063	0	0.237626	0
BT920-P2-F08	1.15565	-0.612308	0	0	0.0483807	0	0	0	0.242087	0	0	0
BT920-P2-F10	1.0238	0.740621	0	0	0.0994167	0	0	0	0.647039	0.593846	0	0
BT920-P2-F12	0.530961	-1.38493	0	0	0.0351896	0	0	0	0.199687	0	0	0
BT920-P2-G02	1.12094	-1.00271	0	0	0.0800486	0	0	0	0.299189	0	0	0
BT920-P2-G03	1.36506	-1.17301	0.228402	0	0.13743	0	0.0726471	0	0.467257	0	0	0
BT920-P2-G05	-1.04247	-0.835762	0	0	0.153889	0	0	0	0.319824	0	0	0
BT920-P2-G06	2.24663	2.2163	0	0	0.144918	0	0	0	0.67283	0	0.894794	0
BT920-P2-G07	-0.124118	-1.05976	0	0	0	0	0.871548	0	0.364504	0	0	1
BT920-P2-G08	1.55516	1.40107	0	0	0	0	0	0	0.595686	0.217984	0	0
BT920-P2-G09	-0.218577	-0.922945	0	0.110223	0.123861	0	0	0	0.318581	0.108241	0	0
BT920-P2-G10	0.912605	-0.381944	0.528289	0	0.030297	0	0	0	0.580036	0	0	0
BT920-P2-G11	1.43825	-1.41104	0	0	0	0	0.306825	0	0.44061	0	0	0
BT920-P2-G12	1.18683	-1.10728	0	0	0	0	0	0	0.263372	0	0	0
BT920-P2-H03	1.72619	1.67306	0	0	0	0	0	0	0.395075	0	0	0
BT920-P2-H04	1.4004	-0.762671	0	0	0	0	0	0	0.481059	0	0.153817	0
BT920-P2-H05	1.37403	-1.18008	0	0	0.0443033	0	0	0	0.576009	0	0	0
BT920-P2-H06	0.516356	-0.831717	0	0	0.0756574	0	0	0	0.570294	0	0	0
BT920-P2-H07	1.31287	-1.14366	0	0	0	0	0	0	0.570237	0	0	0
BT920-P2-H08	0.77875	-1.27171	0	0	0	0	0	0	0.205311	0.306729	0	0
BT920-P2-H09	-0.63192	0.38468	0	0	0.0487179	0	0	0.389087	0.347725	0	0.465995	0
BT920-P2-H10	-1.58507	1.89591	0	0	0	0	0	0.315361	0.259505	0	0.0309458	0
BT920-P2-H11	1.49765	0.786799	0	0.0783249	0	0	0.25537	0	0.531637	0.532061	0	0
BT920-P2-H12	0.777834	0.30515	0	0	0	0	0	0	0.547812	0	0	0
BT920-P3-A01	1.30216	-0.138298	0	0	0.078449	0	0	0	0.558443	0	0	0
BT920-P3-A02	0.470296	-0.818021	0.153466	0	0	0	0	0	0.262334	0	0	0
BT920-P3-A03	1.02231	0.536713	0	0	0.179195	0	0	0	0.526675	0	0	0
BT920-P3-A04	1.2522	-1.1644	0	0	0	0	0.271775	0	0.110239	0	0	0
BT920-P3-A05	1.3754	-0.783775	0	0	0.050058	0	0	0	0.644724	0	0.423124	0
BT920-P3-A06	1.11428	-1.07584	0.603408	0	0.0434441	0	0	0	0.550013	0	0.346136	0
BT920-P3-A07	0.268713	-0.285442	0	0	0.0133206	0	0	0	0.797187	0	0.0899725	0
BT920-P3-A08	1.64383	-0.85215	0	0	0.0734259	0	0	0	0.197623	0	0.216847	0
BT920-P3-A10	0.215827	-1.32823	0	0	0	0	0	0	0.180296	0	0	0
BT920-P3-A11	1.79568	-1.55051	0	0	0.127016	0	0	0	0.451584	0	0.033797	0
BT920-P3-A12	1.28679	-0.832809	0	0	0	0	0.0667301	0	0.641473	0	0	0
BT920-P3-B01	1.45621	-0.357847	0	0	0.0483807	0	0	0	0.444021	0	0	0
BT920-P3-B02	0.74709	0.381723	0	0	0	0	0	0	0.143863	0	0	0
BT920-P3-B03	1.56667	1.19505	0	0	0.0497237	0	0	0.184229	0.527679	0.220484	0.52634	0
BT920-P3-B04	1.052	-1.18918	0	0	0	0	0.352339	0	0.207239	0	0.260618	0
BT920-P3-B05	1.39591	-1.69066	0	0	0	0	0	0	0.256242	0	0	0
BT920-P3-B06	-0.102731	-1.41295	0.0979186	0	0.065661	0	0	0	0.251953	0	0	0
BT920-P3-B07	1.35795	1.19672	0	0	0.0762482	0	0	0	0.536154	0	0.0542949	0
BT920-P3-B09	1.74322	1.45268	0	0	0.0375047	0	0.0249118	0	0.410337	0.453011	0.15543	0
BT920-P3-B10	0.714513	-0.953521	0.228136	0	0.0567936	0	0	0	0.478413	0	0	0
BT920-P3-B11	0.898639	-0.0996211	0	0	0	0	0.50757	0	0.415025	0.266881	0	0
BT920-P3-C01	1.07023	-1.03968	0	0	0.0304802	0	0.386392	0	0.317406	0	0.444491	0
BT920-P3-C02	0.585071	-1.04653	0	0.0409478	0.0376821	0	0	0	0.537249	0	0.0635577	0
BT920-P3-C03	-0.881405	-1.21868	0	0	0	0	0	0	0.365348	0	0.044674	0
BT920-P3-C04	0.88036	-1.26147	0	0	0	0	0	0	0.457207	0	0.13753	0
BT920-P3-C06	1.48114	0.270957	0	0	0.0468618	0	0	0	0.524667	0	0	0
BT920-P3-C07	0.854953	-0.498943	0.18076	0.0637214	0.0836392	0	0	0	0.0546648	0	0.0526825	0
BT920-P3-C08	-0.440012	-1.3223	0.591017	0	0.0234045	0	0	0	0.0969122	0	0.434231	0
BT920-P3-C09	0.53973	-0.553336	0.530576	0	0.0306635	0	0	0	0.42942	0	0	0
BT920-P3-C10	0.805582	-1.13832	0.429608	0	0	0	0	0	0.035798	0	0.0903202	0
BT920-P3-C11	1.12647	0.677905	0	0	0.0518863	0	0.560023	0	0.232562	0.081899	0.43155	0
BT920-P3-C12	0.322902	-0.767074	0	0	0.0655071	0	0.785797	0	0.40031	0	0	0
BT920-P3-D01	2.18846	1.98261	0	0	0.14757	0	0	0	0.688241	0	0.705213	0
BT920-P3-D02	1.48327	-1.27297	0	0	0.110617	0	0	0	0.549066	0	0	0
BT920-P3-D03	1.08209	-1.43154	0	0	0.0559843	0	0.0721372	0	0.251531	0	0.0594609	0
BT920-P3-D04	1.42516	-0.828308	0	0	0.0582451	0	0	0	0.561671	0	0.0404647	0
BT920-P3-D06	1.29967	0.700143	0	0	0.0781557	0	0	0.446352	0.683861	0.531603	0	0
BT920-P3-D07	0.95655	-0.943231	0	0	0.0401452	0	0	0	0.42601	0	0	0
BT920-P3-D08	1.69012	-1.26147	0	0.0384437	0.0535343	0	0	0	0.460436	0	0	0
BT920-P3-D09	1.10648	-0.912018	0	0	0.0369724	0	0	0	0.340447	0	0	0
BT920-P3-D10	1.34458	-0.601899	0	0	0.0807714	0	0	0	0.333455	0	0	0
BT920-P3-D11	2.43446	2.22296	0	0	0.0617493	0	0	0	0.495318	0	0	0
BT920-P3-D12	1.43812	-0.592243	0	0	0.116795	0	0	0	0.326052	0	0	0
BT920-P3-E01	1.0343	-0.593631	0	0	0.0822097	0	0	0	0.561386	0	0	0
BT920-P3-E02	1.01365	-1.33611	0	0	0.0470304	0	0.0255015	0	0.455211	0	0.0262729	0
BT920-P3-E03	1.10991	-0.739462	0.164271	0	0	0	0	0	0.50434	0	0	0
BT920-P3-E04	1.08427	-1.21377	0	0	0	0	0	0	0.27982	0	0.133468	0
BT920-P3-E05	0.0113262	-0.929135	0.204729	0	0.0335709	0	0	0	0.401679	0	0	0
BT920-P3-E06	0.393406	-0.753918	0	0	0	0	0	0	0.552637	0	0.729053	0
BT920-P3-E09	-0.331152	-0.720789	0.66622	0	0.0249146	0	0	0	0.052047	0	0	0
BT920-P3-E12	1.46433	1.08755	0	0	0	0	0	0	0.598743	0	0.739987	0
BT920-P3-F01	0.939788	-0.531521	0	0	0.0477077	0	0	0	0.479006	0	0.419439	0
BT920-P3-F02	1.36748	-1.18489	0	0	0.0312119	0	0	0	0.606055	0	0.293576	0
BT920-P3-F03	-0.133244	-0.670913	0	0	0.0382128	0	0	0	0.437542	0	0.253577	0
BT920-P3-F05	1.10909	-0.834949	0	0	0.0432726	0	0	0	0.790263	0	0	0
BT920-P3-F06	0.650319	-1.23355	0	0	0	0	0	0	0.186935	0	0	0
BT920-P3-F07	1.75097	1.46329	0	0	0.0655071	0	0	0	0.713438	0.548012	0	0
BT920-P3-F08	1.82718	1.69833	0	0	0.149564	0	0	0	0.607652	0	0	0
BT920-P3-F09	-0.107773	-0.525621	0	0	0	0	0.0477464	0	0.632598	0	0	0.375653
BT920-P3-F10	1.75634	-1.37879	0.0906761	0	0.032486	0	0	0	0.319619	0	0	0
BT920-P3-F11	0.785183	-0.546363	0	0	0.122087	0	0	0	0.432785	0	0	0
BT920-P3-F12	1.64892	1.32267	0	0.0323392	0.0403212	0	0	0	0.521519	0	0	0
BT920-P3-G01	2.21891	1.98841	0	0	0.0243487	0	0	0	0.595823	0	0	0
BT920-P3-G03	-0.730169	-1.01126	0.335601	0	0	0	0	0.243373	0.488268	0.452917	0	0
BT920-P3-G04	1.5762	-1.37505	0	0	0.049388	0	0	0	0.428839	0	0.28631	0
BT920-P3-G05	0.349507	-0.125862	0	0	0	0	0	0	0.623792	0	0.152466	0
BT920-P3-G06	0.48609	-1.11798	0.61288	0	0	0	0.288558	0	0.396272	0	0.133908	0
BT920-P3-G07	1.42479	-1.37289	0	0	0	0	0	0.181403	0.555751	0	0.0536911	0
BT920-P3-G08	0.691235	-1.00108	0	0	0	0	0	0.167105	0.145984	0	0.331102	0
BT920-P3-G09	2.27463	2.2454	0	0	0.093247	0	0	0	0.645728	0	0	0
BT920-P3-G10	1.63163	-1.44508	0	0	0.03103	0	0	0	0.574481	0	0.385305	0
BT920-P3-G11	0.803217	-0.917192	0	0	0.0693514	0	0	0	0.238345	0	0	0
BT920-P3-G12	0.752251	-0.827899	0	0.0242589	0.022645	0	0	0	0.340322	0	0.193491	0
BT920-P3-H01	1.51519	-1.51451	0.460706	0	0	0	0.180262	0	0.603363	0	0	0
BT920-P3-H02	1.50345	-0.216971	0	0	0.0397963	0	0	0	0.382527	0	0.497708	0
BT920-P3-H03	1.44162	1.35804	0	0.0431847	0.0780106	0	0	0	0.55007	0.111165	0	0
BT920-P3-H05	0.997136	-0.972135	0	0	0.0113251	0	0	0	0.578792	0	0	0
BT920-P3-H06	1.18942	-1.43409	0	0	0.128174	0	0	0	0.184539	0	0	0
BT920-P3-H07	0.569048	-0.788953	0	0	0.0436157	0	0	0	0.387797	0	0	0
BT920-P3-H08	1.36177	-1.38457	0	0	0.135656	0.146424	0	0	0.543945	0	0	0
BT920-P3-H09	-0.683559	-0.94974	0	0	0	0	0.0924112	0.395134	0.189444	0	0	0
BT920-P3-H10	0.306797	-1.3096	0	0.0449112	0	0	0	0	0.163334	0	0.123475	0
BT920-P3-H11	1.63496	-0.905113	0	0	0.0722265	0	0	0	0.608655	0	0.0357502	0
BT920-P3-H12	-0.155388	-0.691298	0	0	0	0	0	0	0.356634	0	0.0991972	0
BT920-P4-A01	0.574198	-1.97256	0.351051	0	0.0461829	0	0	0	0.0302782	0	0	0
BT920-P4-A02	0.281496	-0.291887	0	0	0	0	0	0	0.516066	0	0	0
BT920-P4-A03	0.33685	-0.692832	0.259163	0	0.0408446	0	0	0	0.319858	0	0	0
BT920-P4-A04	0.818191	-1.09676	0	0.0266273	0.0346515	0	0	0	0.553082	0	0	0
BT920-P4-A05	0.462185	-1.35039	0	0	0.0455012	0	0	0	0.296771	0	0	0
BT920-P4-A06	0.821406	-1.40853	0	0	0.0713234	0	0	0	0.492854	0	0.0580803	0
BT920-P4-A07	0.28042	-0.361603	0	0.0194603	0.0906446	0	0.0257964	0	0.451789	0	0	0
BT920-P4-A08	0.144108	0.0711696	0	0	0.0645731	0	0	0	0.529378	0	0.587152	0
BT920-P4-A09	-0.00930378	-0.481406	0	0	0	0	0	0	0.218087	0.292445	0.0709919	0
BT920-P4-A10	0.298332	-1.08503	0	0	0.0337513	0	0	0	0.25306	0	0	0
BT920-P4-A11	1.27873	-0.685037	0	0.0911761	0.0582451	0	0	0	0.249444	0	0.133176	0
BT920-P4-A12	0.552751	-0.899752	0	0	0.0971573	0	0.211623	0	0.292345	0	0	0
BT920-P4-B01	1.22624	-0.465034	0	0	0.0359051	0	0	0	0.571618	0	0	0
BT920-P4-B03	1.19176	-0.708342	0	0	0.0607992	0	0	0	0.545165	0	0	0
BT920-P4-B04	1.33838	-1.74369	0	0	0.0162789	0	0	0	0.348991	0	0	0
BT920-P4-B05	1.26095	-0.993564	0	0.0391974	0.0639485	0	0	0	0.612203	0	0	0
BT920-P4-B06	0.82139	-0.780005	0	0	0.0699598	0	0	0	0.591157	0	0	0
BT920-P4-B09	1.48517	1.04704	0	0.0621025	0	0	0	0	0.450432	0.0639656	0.093943	0
BT920-P4-B11	1.54789	-0.938514	0	0	0.20868	0	0	0	0.27398	0	0	0
BT920-P4-B12	1.78168	-1.58021	0.235924	0.0680675	0.159036	0	0	0	0.419873	0	0	0
BT920-P4-C01	0.0646196	0.179811	0.297684	0	0.032486	0	0	0	0.592469	0	0	0
BT920-P4-C02	-0.235018	-0.884016	0	0	0	0	0	0	0.451424	0	0.101702	0
BT920-P4-C03	1.35454	-1.34816	0	0	0.0639485	0	0	0	0.407132	0	0	0
BT920-P4-C04	1.3608	-0.929218	0	0.018113	0.0941971	0	0.0195406	0	0.472299	0	0	0
BT920-P4-C05	-0.603146	-0.649218	0	0	0.073725	0	0.526924	0	0.383611	0	0	0
BT920-P4-C06	1.41824	-1.26596	0	0.0483363	0.0659718	0	0	0	0.280482	0	0	0
BT920-P4-C07	0.957752	-0.698053	0	0	0.12562	0	0	0	0.552694	0	0.0554956	0
BT920-P4-C08	2.10001	2.06841	0	0	0.0768362	0	0	0	0.631127	0.350697	0	0
BT920-P4-C09	1.63294	-1.6613	0.0966668	0	0.0315769	0	0	0	0.435785	0	0	0
BT920-P4-C10	0.282347	-1.10967	0	0.0318248	0	0	0.0131587	0	0.344063	0	0	0
BT920-P4-C12	0.512787	-0.732746	0.287131	0	0	0	0.217347	0	0.431052	0.395322	0	0
BT920-P4-D02	0.740507	-0.959735	0	0	0	0	0	0	0.53434	0	0	0
BT920-P4-D03	0.790602	-1.39541	0	0	0.0267855	0	0	0.185797	0.384147	0	0	0
BT920-P4-D04	0.529179	-1.23549	0	0	0.0490537	0	0	0	0.628458	0	0	0
BT920-P4-D05	0.925945	-0.915093	0	0	0.0771309	0	0	0	0.124893	0	0	0
BT920-P4-D06	0.616407	-0.462026	0	0	0.188682	0	0	0	0.469584	0	0.219962	0
BT920-P4-D07	1.21491	-0.837082	0	0	0.0306635	0	0.445074	0	0.478607	0	0	0
BT920-P4-D08	1.1005	-1.11664	0	0	0.0251023	0	0	0	0.286619	0	0.107285	0
BT920-P4-D10	1.30909	-0.971632	0	0	0	0	0	0	0.4205	0	0	0
BT920-P4-D11	1.53019	-1.42143	0	0	0	0	0	0	0.368599	0	0	0
BT920-P4-D12	0.592301	0.0935103	0	0	0.082783	0	0	0	0.144821	0	0.23984	0
BT920-P4-E01	1.2791	-0.54976	0	0	0.0664352	0	0	0	0.438261	0	0	0
BT920-P4-E02	1.33965	-1.14513	0	0	0	0	0	0	0.402181	0	0	0
BT920-P4-E03	1.07029	-0.0155534	0	0.0461393	0.116674	0	0	0	0.489238	0	0	0
BT920-P4-E05	1.2484	-1.53189	0	0	0	0	0.118398	0	0.338337	0	0.431377	0
BT920-P4-E09	1.39078	-1.48594	0	0	0	0	0	0	0.0153855	0	0.168092	0
BT920-P4-E10	0.360254	-0.9722	0	0	0.050058	0	0	0	0.293406	0	0.467535	0
BT920-P4-E11	-0.0768955	-0.9289	0	0	0.0572789	0	0	0	0.260554	0.253372	0	0
BT920-P4-E12	1.00683	0.0472076	0	0	0.0429266	0	0	0	0.299645	0.352282	0.502777	0
BT920-P4-F01	0.855239	0.472484	0	0	0.0688939	0	0	0	0.292037	0	0.58999	0
BT920-P4-F02	0.912849	0.236225	0	0	0	0	0	0	0.269725	0	0.310323	0
BT920-P4-F03	1.44465	-1.42742	0.0743851	0	0.0753612	0	0.116627	0	0.425485	0	0	0
BT920-P4-F04	0.570162	-0.647797	0	0.0441735	0.103994	0	0	0.0551981	0.644861	0	0	0
BT920-P4-F05	0.676654	-0.928594	0	0	0.071775	0	0.0866094	0	0.335406	0	0.435373	0
BT920-P4-F06	-1.38413	1.2583	0	0	0	0	0	0	0.329862	0	0	0
BT920-P4-F07	1.06589	-0.990335	0.0583439	0	0	0	0	0	0.333615	0	0.660473	0
BT920-P4-F08	-0.603259	0.243627	0	0	0.0466917	0	0	0	0.416211	0	0	0
BT920-P4-F09	-0.485754	-0.529472	0	0	0.107714	0	0	0	0.294535	0.211212	0.685732	0
BT920-P4-F10	-1.25158	1.3456	0	0	0.0903689	0	0	0.400913	0.17522	0	0	0
BT920-P4-F11	0.00673809	-1.65289	0	0.0439263	0.0787407	0	0	0	0.0733902	0	0.151653	0
BT920-P4-G01	0.961942	-1.37323	0	0	0.0211202	0	0	0	0.566519	0	0.330236	0
BT920-P4-G02	1.31967	-0.472277	0	0	0	0	0	0	0.493048	0	0	0
BT920-P4-G03	2.186	2.10372	0	0	0.118251	0	0	0	0.643503	0	0	0
BT920-P4-G05	2.21912	1.76362	0	0	0	0	0	0	0.243524	0	0	0
BT920-P4-G07	-0.068034	-0.326502	0	0	0.0434441	0	0	0.325068	0.077037	0	0.375634	0
BT920-P4-G08	0.423722	-0.601097	0	0	0.0237828	0	0	0	0.280664	0	0	0
BT920-P4-G09	1.01106	-1.44805	0	0	0.142452	0	0	0	0.499048	0	0	0
BT920-P4-G10	-0.795951	-0.904179	0	0	0.0690464	0	0	0	0.21244	0	0	0
BT920-P4-G11	1.56417	-1.08372	0.161647	0.0389462	0	0	0.0591127	0	0.417375	0	0	0
BT920-P4-G12	1.58406	0.591544	0	0	0.141261	0	0	0	0.514424	0	0	0
BT920-P4-H02	1.6096	1.31648	0	0	0	0	0.460814	0.231081	0.467827	0	0	0
BT920-P4-H03	-0.343148	-0.186135	0	0.0480931	0.0301137	0	0	0	0.347166	0	0.499057	0
BT920-P4-H04	-0.480003	1.00305	0	0.00682151	0.0641054	0	0	0	0.444648	0	0.0823723	0
BT920-P4-H05	-1.19882	-0.594047	0	0	0.049388	0	0	0	0.492956	0	0	0
BT920-P4-H08	1.22532	-1.5602	0	0.0281963	0.0178404	0	0	0	0.184859	0	0	0
BT920-P4-H09	1.13043	-1.49403	0.230227	0.0253135	0	0	0	0	0.313436	0	0.0208214	0
BT920-P4-H10	0.601844	-0.729006	0	0	0.0149036	0	0.0829293	0	0.402101	0	0.634418	0
BT920-P4-H11	-0.557254	-0.291242	0	0	0.0878706	0	0	0	0.344679	0	0.106145	0
BT920-P4-H12	0.815612	-0.943844	0	0	0.0854837	0	0	0	0.340014	0	0.110993	0
MGH100-P5-A01	-1.55691	-1.49789	0	0	0.15744	0	0	0.519136	0.277949	0.386568	0.598825	0
MGH100-P5-A03	-0.105311	1.34162	0	0.0175724	0.0604811	0	0	0.567733	0.267891	0.42831	0.383812	0
MGH100-P5-A04	2.13782	-2.0414	0	0	0.0582444	0.537504	0	0	0.312085	0	0	0
MGH100-P5-A06	-0.0428043	0.998145	0	0	0.0639488	0	0	0.356521	0.342984	0.438282	0	0
MGH100-P5-A07	0.91888	-0.914963	0	0	0	0	0	0	0.256694	0	0.121795	0
MGH100-P5-A08	0.134653	1.05047	0	0.0416957	0.0498905	0	0	0	0.41035	0.440532	0.0344497	0
MGH100-P5-A09	0.00583816	0.52745	0	0.0421929	0.270183	0.0466901	0.0174274	0.228509	0.363387	0.40406	0	0
MGH100-P5-A10	2.6334	-2.381	0	0	0.61602	0	0	0	0.0513258	0	0	0
MGH100-P5-A12	0.887258	1.07953	0	0	0.116673	0	0	0	0.438246	0.372287	0.136376	0
MGH100-P5-B02	0.0987203	0.860104	0	0	0.0258519	0	0	0.40375	0.360597	0.594548	0	0
MGH100-P5-B07	0.416195	-0.990204	0	0.0202656	0.0827833	0	0	0.52412	0.221675	0	0	0
MGH100-P5-B08	1.27098	2.24869	0	0.0302755	0.0947385	0	0	0.357299	0.413794	0.346084	0.0249211	0
MGH100-P5-B09	2.17642	-2.17013	0	0	0	0	0	0	0	0	0	0
MGH100-P5-B10	-1.53214	-2.06813	0	0	0.633753	0	0	0	0.0691216	0	0.268828	0
MGH100-P5-C03	-0.945293	-1.53609	0	0	0.088428	0	0	0.114537	0.101682	0.135196	0	0
MGH100-P5-C04	0.56911	1.56911	0	0	0.106821	0	0	0.308932	0.402583	0.481085	0	0
MGH100-P5-C06	-1.41765	-1.96145	0	0	0.456008	0	0	0	0.0244248	0	0.539758	0
MGH100-P5-C08	0.784886	1.20644	0	0	0.107204	0	0	0.741704	0.594205	0	0	0
MGH100-P5-C10	0.988251	-1.88653	0	0.0255773	0.108601	0	0	0	0.0361942	0	0.145319	0
MGH100-P5-D01	-0.39551	0.921294	0.113297	0	0.0151007	0	0	0.0812864	0.441766	0.575708	0	0
MGH100-P5-D03	-1.39432	-1.80133	0	0	0.0672067	0	0	0	0.0211291	0.0558836	0	0
MGH100-P5-D04	-1.55343	-1.84109	0	0.0167596	0.276744	0	0	0.127591	0.139694	0.430389	0.372905	0
MGH100-P5-D07	-1.35358	-1.04605	0	0	0.0480446	0	0	0.328474	0.267146	0	0	0
MGH100-P5-D09	-0.845669	-1.36584	0	0	0.267632	0	0	0	0.0797965	0	0.0787579	0
MGH100-P5-E01	-0.974262	-1.24236	0	0	0.0713229	0	0	0.10912	0.27128	0.424778	0	0
MGH100-P5-E02	-1.62038	-1.51443	0	0	0	0	0	0.351095	0.187301	0.735335	0	0
MGH100-P5-E06	1.64725	-1.69611	0	0	0.0378591	0	0	0	0.382136	0.548427	0	0
MGH100-P5-E08	-1.35186	-1.60768	0	0.0351528	0.0387415	0	0	0.151721	0.197968	0.116949	0.262369	0
MGH100-P5-E11	1.68719	-2.07544	0	0	0	0	0	0	0	0	0.223864	0
MGH100-P5-E12	0.260334	-1.61177	0	0	0	0	0	0.196566	0.0621648	0	0.0524805	0
MGH100-P5-F04	-1.1236	-0.94618	0	0	0.535467	0	0	0.596578	0.10735	0.279432	0	0
MGH100-P5-F06	-1.61328	-0.71065	0.0641777	0	0.50884	0	0	0.443254	0.36268	0.425617	0.0289542	0
MGH100-P5-F09	1.00508	1.33975	0	0	0.0790317	0	0.0299017	0.515478	0.442997	0.616305	0	0
MGH100-P5-F11	-1.5311	-1.76362	0	0	0.0979577	0	0	0.0330462	0.0367217	0	0.453989	0
MGH100-P5-F12	0.40844	1.47537	0	0	0	0	0	0	0.205455	0.701183	0	0
MGH100-P5-G01	1.7513	-1.85969	0	0	0	0	0.0307744	0	0.19437	0	0	0
MGH100-P5-G02	-0.411219	-1.51384	0	0.027936	0.183501	0	0	0.444225	0.242958	0.304332	0.530456	0
MGH100-P5-G03	-0.951908	-0.141871	0	0	0.0728274	0	0	0.284459	0.358542	0.514437	0.185897	0
MGH100-P5-G06	-0.0768841	-0.638614	0	0	0.568457	0	0	0.226506	0.389536	0.685157	0	0
MGH100-P5-G09	-1.78521	-2.00397	0	0	0.0220746	0	0	0.418346	0.110743	0	0.593395	0
MGH100-P5-G12	0.70451	0.129244	0	0.0538747	0.0903686	0	0	0.286368	0.317216	0.537859	0	0
MGH100-P5-H01	-1.21331	-1.48064	0.332842	0	0.0249139	0	0	0.0890705	0.0445627	0	0.131413	0
MGH100-P5-H03	0.827955	-1.82552	0	0	0.0670527	0	0	0	0.0381635	0	0	0
MGH100-P5-H04	0.481947	1.48852	0	0	0.0420617	0	0	0.415179	0.557566	0.465192	0.065101	0
MGH100-P5-H06	-0.495364	-1.3319	0	0	0.0463524	0	0	0.251245	0.194168	0.510662	0	0
MGH100-P5-H07	0.202247	0.171371	0	0	0.3282	0	0	0.280327	0.454587	0.511076	0.069296	0
MGH100-P5-H10	0.665548	0.0832889	0	0	0.0592059	0	0	0.180063	0.416121	0.48656	0	0
MGH100-P5-H11	1.98678	-2.14987	0	0	0.0351894	0	0	0	0.0592057	0	0.109709	0
MGH100-P6-A01	1.04554	1.84641	0	0.0325961	0.0716247	0	0	0.173556	0.513281	0.422223	0.267806	0
MGH100-P6-A02	-0.240871	0.835211	0.320712	0	0.0956825	0	0	0.517726	0.310795	0.146187	0.165533	0
MGH100-P6-A06	-0.178903	-1.67324	0	0	0.219819	0	0	0	0.0893434	0	0.0890998	0
MGH100-P6-A07	0.00673086	1.18439	0	0	0	0	0	0.205164	0.384316	0.432575	0	0
MGH100-P6-A09	-0.289387	0.148818	0.240422	0	0.0696556	0	0	0.0954228	0.402254	0.307226	0	0
MGH100-P6-A11	1.27849	1.82635	0	0	0.147988	0	0	0.602911	0.346248	0.382354	0	0
MGH100-P6-A12	0.720339	-0.290546	0	0	0.0417146	0	0	0.294315	0.114725	0.286313	0	0
MGH100-P6-B06	0.203777	-0.852797	0	0	0.41218	0	0	0.124184	0.114807	0	0	0
MGH100-P6-B07	-0.671077	-0.257087	0	0	0.0595254	0	0	0.139448	0.140046	0.487666	0	0
MGH100-P6-B09	-0.323785	-0.186946	0	0.0294978	0.13138	0	0	0	0.193306	0.573134	0.396209	0
MGH100-P6-B10	-1.74033	-1.88094	0	0	0.0415409	0	0	0.159883	0.0477944	0.0365619	0.439486	0
MGH100-P6-B12	1.37984	0.234182	0	0	0.10631	0	0	0	0.422355	0.240815	0	0
MGH100-P6-C01	1.69617	-2.08697	0	0	0.741159	0	0	0	0.143385	0	0	0
MGH100-P6-C04	-0.18698	1.28259	0	0	0	0	0	0.465073	0.341503	0.440243	0.158623	0
MGH100-P6-C05	0.352348	1.23206	0	0	0.157742	0	0	0	0.41142	0.472011	0.624494	0
MGH100-P6-C09	1.84986	-1.49036	0	0	0.368521	0	0	0	0.250491	0.578416	0.111152	0
MGH100-P6-C11	-0.746837	-1.39859	0.380166	0	0.1269	0	0	0.105751	0.111079	0	0.0514671	0
MGH100-P6-D02	0.926452	0.936481	0	0	0.032667	0	0	0	0.403265	0	0	0
MGH100-P6-D04	1.93383	-2.03899	0	0	0.197175	0	0	0	0	0	0	0
MGH100-P6-D05	-1.05253	-1.30593	0.201388	0	0	0.147438	0	0.0906446	0.0551364	0.0421979	0.439787	0
MGH100-P6-D07	-1.17559	-0.695883	0	0	0.0522168	0	0	0.524276	0.296825	0	0.39738	0
MGH100-P6-D08	1.2712	1.74271	0	0	0	0	0	0.375726	0.454763	0.723767	0	0
MGH100-P6-D09	-1.82896	-1.81678	0	0	0.395572	0	0	0.151624	0.0162821	0.0942767	0.0789399	0
MGH100-P6-D10	-0.627091	0.750238	0	0.0533973	0.0906444	0	0	0.374983	0.356876	0.35518	0	0
MGH100-P6-D12	-1.20163	-1.55165	0	0	0.0512229	0	0	0.0951673	0.0132735	0.46028	0	0
MGH100-P6-E04	0.252337	1.86594	0	0	0	0	0	0.555951	0.474849	0.448743	0	0
MGH100-P6-E05	-1.14989	-1.85876	0	0	0.420367	0	0	0	0.078678	0.432628	0	0
MGH100-P6-E07	-0.158497	-1.16594	0	0	0.349705	0	0	0	0.212842	0	0.249479	0
MGH100-P6-E08	1.94928	2.17597	0	0	0.052382	0	0.14832	0.213414	0.552343	0.395875	0	0
MGH100-P6-E09	-1.56123	-1.70077	0	0	0.0707181	0	0.0532087	0	0.0302779	0.283639	0.374747	0
MGH100-P6-F01	-1.51167	-1.76676	0	0	0.0670527	0	0	0	0	0	0	0
MGH100-P6-F05	0.988921	1.34787	0	0	0.0656616	0	0	0	0.301421	0.408062	0	0
MGH100-P6-F07	-1.5642	-1.54556	0.20495	0	0.057601	0	0	0.358988	0.0293167	0.0646606	0	0
MGH100-P6-F09	-1.18729	1.32965	0	0	0.0728274	0	0	0.525548	0.0994495	0.657178	0	0
MGH100-P6-F11	-1.03589	-1.46885	0	0	0.16591	0	0	0.235946	0.051927	0	0	0
MGH100-P6-F12	0.183823	1.27792	0	0	0.634323	0	0	0.327659	0.23256	0.598744	0	0
MGH100-P6-G02	-1.53914	-1.72929	0	0	0.0612742	0	0	0	0.0585152	0	0.339375	0
MGH100-P6-G04	-0.407443	1.11144	0.491913	0	0.0947385	0	0	0.315324	0.247043	0.475673	0	0
MGH100-P6-G07	-0.666499	-0.919792	0	0	0	0	0	0.309112	0	0.0343645	0.495722	0
MGH100-P6-G11	-1.29846	-1.71127	0	0	0.240679	0	0	0	0.0284883	0.295725	0.0726766	0
MGH100-P6-G12	-1.70414	-1.85889	0	0	0.481544	0	0	0	0.188352	0	0.222025	0
MGH100-P6-H01	0.427326	1.21082	0	0	0.0482131	0	0	0.486137	0.335978	0.627311	0	0
MGH100-P6-H04	1.34377	2.0985	0	0	0.0910574	0	0	0.477686	0.470887	0.433245	0.11653	0
MGH100-P6-H05	0.170943	0.948276	0.28831	0	0.221013	0	0	0.485442	0.497017	0.534598	0	0
MGH100-P6-H06	2.16688	-2.1	0	0	0.0761	0	0	0	0.100167	0	0.794353	0
MGH100-P6-H09	0.756021	0.908416	0	0	0.109233	0	0	0.427809	0.41848	0.546067	0	0
MGH100-P6-H11	0.312291	0.796884	0	0	0.0628516	0	0	0.401374	0.407552	0.579519	0	0
MGH100-P6-H12	2.61243	-2.41722	0	0	0.379141	0	0.137477	0	0.0205491	0	0	0
MGH100-P8-A02	0.527122	1.52909	0	0	0	0	0	0	0.371314	0.364285	0.537537	0
MGH100-P8-A04	-0.816079	-1.82532	0	0	0.091881	0	0	0	0.0367217	0.497839	0	0
MGH100-P8-A06	-1.48445	-1.93622	0	0	0.464812	0	0	0	0	0	0.0947982	0
MGH100-P8-A08	0.366959	0.922416	0	0.0526797	0.130925	0	0	0.187671	0.363514	0.291448	0.141384	0
MGH100-P8-A12	2.06122	-1.89983	0	0.00766287	0.0480446	0	0	0	0.210477	0	0	0
MGH100-P8-B02	0.0169175	1.44422	0	0.102272	0.134203	0	0	0.571436	0.170319	0.735667	0	0
MGH100-P8-B03	1.5429	1.81604	0	0.0336215	0.07447	0	0	0.157073	0.206067	0.255702	0	0
MGH100-P8-B06	1.41447	2.25565	0	0.0597761	0.121611	0	0	0.679046	0.441721	0.688329	0	0
MGH100-P8-B08	0.530684	0.791146	0	0	0.0577621	0	0.0204419	0.304679	0.299539	0.52073	0	0
MGH100-P8-B09	1.17068	1.7991	0	0	0.115451	0	0	0.154701	0.382346	0.646411	0	0
MGH100-P8-B10	-0.496833	0.331025	0	0	0.021311	0	0	0.226171	0.234274	0.499744	0.21016	0
MGH100-P8-B11	-0.59994	-0.0684007	0	0	0.0323041	0	0	0.312131	0.0987285	0.495069	0	0
MGH100-P8-B12	-0.107018	1.50465	0	0	0.087451	0	0	0.0893337	0.247592	0.18307	0.217368	0
MGH100-P8-C02	-1.56599	-1.37433	0	0	0.118855	0	0	0.117537	0.232841	0.506945	0	0
MGH100-P8-C03	-0.152256	1.55197	0	0	0.142452	0	0	0	0.510819	0.600896	0	0
MGH100-P8-C04	0.422064	1.15133	0	0	0.0530414	0	0	0.540174	0.215306	0.598581	0	0
MGH100-P8-C07	-0.407014	1.63646	0.259218	0.0616392	0.204138	0	0	0.710878	0.415858	0.744627	0	0
MGH100-P8-C09	1.8562	-1.72451	0	0	0	0	0	0	0	0	0	0
MGH100-P8-C10	-0.377239	-1.61443	0	0	0.572888	0	0.295613	0	0.127645	0.370815	0	0
MGH100-P8-C12	-0.510162	-1.27786	0	0	0.0925648	0	0	0	0.0721216	0.232315	0	0
MGH100-P8-D01	0.425149	1.55488	0	0	0.0725273	0	0	0.558784	0.445805	0.462809	0	0
MGH100-P8-D02	0.417629	-1.87864	0.338016	0.170178	0.279526	0	0	0	0.0977319	0	0.525884	0
MGH100-P8-D03	-1.24292	-1.4375	0	0	0.0367953	0	0	0.291212	0	0.453369	0.258057	0
MGH100-P8-D05	-1.68495	-1.48374	0	0	0.103606	0	0	0	0.0137283	0	0.426496	0
MGH100-P8-D08	1.9754	-2.23517	0	0	0.193817	0	0	0	0.308287	0.376225	0	0
MGH100-P8-D09	2.23059	-2.02733	0.221133	0	0.710344	0	0	0	0.0313695	0	0	0
MGH100-P8-D11	1.1868	-1.27346	0	0	0.19842	0	0	0.191212	0.270296	0.397275	0	0
MGH100-P8-E03	-0.656702	0.618548	0	0	0.0170611	0	0	0.411368	0.174817	0.617845	0.0880496	0
MGH100-P8-E05	0.475859	1.44765	0.34269	0	0.106694	0	0	0.409135	0.30932	0.472916	0	0
MGH100-P8-E06	0.595285	0.862213	0	0	0.047876	0	0	0.414594	0.428361	0.637977	0.0631706	0
MGH100-P8-E08	-0.80156	-0.7852	0	0.0208012	0.013122	0	0	0.313712	0.210294	0.689242	0	0
MGH100-P8-E09	-1.27616	-1.08343	0.0668146	0	0.461759	0	0	0	0.21734	0	0.299733	0
MGH100-P8-F03	2.0165	-2.10292	0	0	0.341952	0	0	0	0.137782	0	0	0
MGH100-P8-F04	-0.758045	-1.47448	0.568666	0	0.447154	0	0	0	0.193459	0.405085	0.0436279	0
MGH100-P8-F05	-0.112713	1.00285	0	0	0.0497234	0	0	0.0937567	0.344411	0.516502	0	0
MGH100-P8-F07	2.01553	-2.38464	0	0.0505162	0.0546812	0	0	0	0.0320481	0	0.155564	0
MGH100-P8-F08	0.953155	1.47684	0	0	0.151737	0	0	0.446335	0.353742	0.638493	0	0
MGH100-P8-F09	1.94745	-1.87827	0.708569	0.0191913	0.0546812	0	0	0.101954	0.0117483	0	0	0
MGH100-P8-F10	0.230585	0.644341	0	0	0.266134	0	0	0.48229	0.186455	0.43247	0.452079	0
MGH100-P8-F11	1.89808	-1.81842	0	0	0.15122	0	0	0	0.0386847	0	0	0
MGH100-P8-G01	-0.0383814	1.44389	0	0	0.0896776	0	0	0.614235	0.486164	0.408927	0	0
MGH100-P8-G02	2.23722	-2.21755	0	0	0.694919	0	0	0	0.186561	0.263488	0	0
MGH100-P8-G03	-0.839208	-1.48635	0	0	0.275194	0	0	0	0.0648498	0.0770277	0	0
MGH100-P8-G04	1.50607	2.16119	0	0	0.161619	0	0	0	0.526994	0.472615	0	0
MGH100-P8-G05	-1.14361	-0.745423	0.523004	0	0.104769	0	0	0.646783	0.247263	0.562041	0.0518729	0
MGH100-P8-G06	0.660989	1.35385	0	0	0.0344718	0	0	0.577449	0.2639	0.673979	0	0
MGH100-P8-G07	1.9461	2.20336	0	0	0	0	0	0	0.448641	0.330687	0.109065	0
MGH100-P8-G08	0.24642	0.000300249	0	0	0.0881493	0	0	0	0.136351	0.61167	0.527156	0
MGH100-P8-G12	-0.12681	-1.82835	0	0	0	0	0	0	0.0869354	0	0	0
MGH100-P8-H02	0.519117	-0.343251	0	0	0	0	0	0.456202	0.102125	0	0	0
MGH100-P8-H05	2.24559	-2.33394	0	0	0.59299	0	0	0	0.208912	0	0.155564	0
MGH100-P8-H08	2.05479	-2.05054	0.17177	0	0.379352	0	0	0	0.0859622	0	0.186489	0
MGH100-P8-H12	1.35503	2.01631	0	0	0.052712	0	0	0.310849	0.365561	0.276712	0.512126	0
MGH100-P9-A01	-0.235976	0.284541	0	0	0.188158	0	0.0713697	0.0475945	0.185285	0.617201	0	0
MGH100-P9-A02	2.3613	-2.5261	0	0	0.0399708	0	0	0	0.0833054	0	0.09633	0
MGH100-P9-A03	1.45284	-1.62027	0	0	0.0699597	0	0	0	0.100793	0.38394	0	0
MGH100-P9-A04	0.111352	1.34157	0	0.0996396	0.0964883	0	0	0.275055	0.440004	0.466425	0.0307259	0
MGH100-P9-A06	2.5067	-2.35125	0	0	0.124566	0	0	0	0.0666158	0	0.0502456	0
MGH100-P9-A07	2.03268	-1.26527	0	0	0.105155	0	0	0.0789473	0.139624	0.310857	0	0
MGH100-P9-A08	2.07429	-1.91003	0	0	0.0625371	0	0	0	0	0	0	0
MGH100-P9-A09	1.58244	1.34286	0	0	0.0170611	0	0	0	0.398031	0.249648	0.575839	0
MGH100-P9-A11	-0.394622	-1.53959	0	0	0.208129	0	0	0	0	0	0	0
MGH100-P9-B01	2.29435	-2.12337	0	0	0.712751	0.439223	0	0	0.347766	0	0	0
MGH100-P9-B03	-0.0894649	1.66436	0.0766161	0	0	0	0	0.590684	0.354907	0.566593	0	0
MGH100-P9-B04	-1.4541	-1.3424	0	0	0.320532	0	0	0.324821	0.0968207	0.457349	0.171756	0
MGH100-P9-B05	1.31045	1.89775	0	0	0.171343	0	0	0.381076	0.4539	0.519836	0.110191	0
MGH100-P9-B06	1.03419	-1.91601	0	0	0.0375051	0	0	0.0393607	0.0355325	0	0.421105	0
MGH100-P9-B07	2.01059	1.82065	0	0	0.0644173	0	0	0	0.461466	0.392274	0	0
MGH100-P9-B08	1.38839	-1.36688	0.658398	0	0.135656	0	0	0	0.0507223	0	0	0
MGH100-P9-B11	0.852999	-2.00813	0	0	0.157239	0	0	0	0.107093	0	0	0
MGH100-P9-C01	-0.465137	1.79728	0	0.0509984	0.0852007	0	0	0.517372	0.227683	0.626571	0	0
MGH100-P9-C02	2.20748	-2.18175	0	0	0.155624	0	0	0	0.116356	0	0	0
MGH100-P9-C03	0.128141	1.76287	0	0	0.0468615	0	0	0.485987	0.389552	0.42574	0	0
MGH100-P9-C04	-1.49923	-1.47412	0	0	0.662845	0	0	0.4042	0.0310973	0.401344	0.110672	0
MGH100-P9-C05	-0.205452	-1.42875	0	0	0.736365	0	0	0	0.068363	0	0.0942855	0
MGH100-P9-C06	2.10537	-2.42316	0	0	0.0620644	0.13468	0	0	0	0	0	0
MGH100-P9-C07	-0.0943706	0.805028	0	0.0678398	0.136101	0	0	0.143016	0.125969	0.561341	0	0
MGH100-P9-C08	-0.831646	-1.56729	0.341719	0	0	0	0	0	0.238808	0.271988	0	0
MGH100-P9-C11	1.77059	1.99864	0	0	0.199329	0	0	0	0.54019	0	0	0
MGH100-P9-D01	-1.61403	-1.94262	0	0	0	0	0	0	0.179527	0	0	0
MGH100-P9-D05	1.00973	-1.10676	0	0	0.0243491	0	0	0.20494	0.118372	0.323699	0	0
MGH100-P9-D06	2.36321	-2.26505	0	0	0.015887	0	0	0	0	0	0	0
MGH100-P9-D07	-0.982751	-1.66153	0	0	0.104123	0	0	0	0.0123601	0.18307	0	0
MGH100-P9-D09	0.250221	-0.888394	0	0	0.029563	0	0	0.308439	0.187511	0.355657	0	0
MGH100-P9-D10	0.140243	1.25475	0	0	0.0714739	0	0	0.388181	0.328639	0.388918	0	0
MGH100-P9-E01	1.90318	-1.38963	0	0	0.0937903	0	0.10394	0	0.285987	0.55148	0	0
MGH100-P9-E04	-1.09323	-1.55255	0.219359	0	0.271418	0	0	0.0743287	0.0917168	0.248559	0.0262727	0
MGH100-P9-E05	1.58276	2.12266	0	0	0.1393	0	0	0.332064	0.374134	0.277536	0	0
MGH100-P9-E06	-0.201597	-0.124522	0	0	0.0819234	0	0	0.100216	0.271849	0.288639	0.409863	0
MGH100-P9-F01	1.70912	1.74551	0	0	0.0814922	0	0	0	0.431416	0.55634	0	0
MGH100-P9-F04	-0.453859	-1.17356	0	0	0.0607987	0	0	0	0.0364582	0	0.0917062	0
MGH100-P9-F06	0.574976	1.29636	0	0	0.0346514	0	0	0.558468	0.550787	0.354909	0	0
MGH100-P9-F07	-0.590642	1.36793	0	0.0909668	0.392882	0	0	0.396129	0.31931	0.639834	0	0
MGH100-P9-F08	-0.256959	1.32109	0	0	0.0487177	0	0	0.218152	0.343188	0.525973	0.0540934	0
MGH100-P9-F09	2.3632	-2.23995	0	0	0.329496	0	0	0	0.11258	0	0	0
MGH100-P9-G01	-1.47194	-1.26297	0	0	0.358197	0	0	0	0.0797965	0	0.480359	0
MGH100-P9-G02	1.97486	1.82176	0	0	0.115083	0	0	0	0.491099	0.250422	0	0
MGH100-P9-G03	0.0455177	-0.493232	0	0	0.0517204	0	0	0	0.0487762	0.413849	0	0
MGH100-P9-G04	1.86689	-1.99969	0	0	0.108221	0	0	0	0.161184	0	0	0
MGH100-P9-G05	0.176475	1.28676	0	0	0.193394	0	0	0.1961	0.447831	0.599865	0	0
MGH100-P9-G06	-1.65449	-1.82272	0	0	0.440696	0	0	0	0.0471779	0.354909	0.0918789	0
MGH100-P9-G07	-1.48968	-1.62583	0	0.0543513	0.170589	0	0	0	0.0328588	0.362701	0.11606	0
MGH100-P9-G08	-0.634547	0.73702	0	0	0.0691986	0	0	0	0.218609	0.268486	0	0
MGH100-P9-G10	0.747267	-0.477251	0	0	0.0672067	0	0	0	0.142349	0.470271	0	0
MGH100-P9-H01	-1.60881	-1.66537	0.157313	0	0.0234044	0	0	0.342163	0.29696	0.293884	0.449289	0
MGH100-P9-H02	1.11632	-1.79877	0	0	0.041193	0	0	0	0.0553717	0.0833547	0.0689176	0
MGH100-P9-H03	1.39735	2.21295	0	0	0	0	0	0.571818	0.52563	0.0776712	0.192332	0
MGH100-P9-H05	-1.21393	-1.24383	0	0	0.282162	0	0	0	0.209236	0.245249	0.27086	0
MGH100-P9-H06	0.108926	1.37445	0	0	0.00951294	0	0	0.342885	0.44586	0.701657	0	0
MGH100-P9-H07	1.37311	-1.95485	0	0	0.183235	0	0	0	0.26113	0	0.493175	0
MGH100-P9-H08	-0.988629	-1.52423	0	0	0.0922916	0	0	0	0	0	0.224677	0
MGH100-P9-H09	0.491993	1.31245	0	0	0.117767	0	0	0.354669	0.484223	0.469479	0	0
MGH100-P9-H11	0.817687	1.27762	0	0	0.0315766	0	0	0	0.308514	0.564015	0	0
MGH101-P2-A01	0.925729	-1.79959	0	0.0569585	0	0	0	0	0	0	0	0
MGH101-P2-A04	0.546155	-1.91827	0	0.0145806	0.0135192	0	0	0	0.408573	0	0	0
MGH101-P2-A08	-1.60311	-1.71197	0	0	0.0687406	0	0	0.102818	0.500874	0	0.919576	0
MGH101-P2-B01	-1.66869	-1.57451	0.262511	0	0.0533704	0	0	0.621688	0.506631	0	0.382306	0
MGH101-P2-B02	-1.23715	-1.37775	0	0	0.0420617	0	0	0	0.328057	0	0	0
MGH101-P2-B03	-1.35157	-1.65805	0	0.0509984	0.0328481	0	0	0	0.0214183	0	0	0
MGH101-P2-B07	-0.295947	-1.56965	0	0	0.0441321	0	0	0	0	0	0	0
MGH101-P2-B08	-0.137406	-1.45481	0.310535	0.0051312	0.0215022	0	0	0	0.25185	0	0	0
MGH101-P2-B09	-0.376582	-1.53192	0	0	0.135098	0	0	0	0.171019	0	0	0
MGH101-P2-B12	1.87697	-1.75503	1	0	0.0962201	0	0	0	0.549484	0	0	0
MGH101-P2-C05	-1.32936	-1.95984	0	0	0.0925648	0	0	0	0	0	0	0
MGH101-P2-C06	1.18877	-1.83722	0.6646	0	0.0162791	0	0	0	0.00374213	0	0	0
MGH101-P2-C07	-0.882766	-1.5486	0	0.0473621	0.0160831	0	0	0	0.468193	0	0	0
MGH101-P2-C08	-0.493867	-1.25419	0	0.0151269	0.0273442	0	0	0	0.593215	0	0	0
MGH101-P2-C09	-0.0458081	-1.30019	0	0	0.0559839	0	0	0	0.501352	0	0	0
MGH101-P2-C10	-1.34131	-1.34139	0	0.0110041	0.0634793	0	0	0.0744702	0.261869	0.108062	0	0
MGH101-P2-C11	-1.16173	-1.76087	0	0.0107272	0.00686758	0	0	0	0.468393	0	0.387009	0
MGH101-P2-D03	-1.09987	-1.51907	0	0	1	0	0	0	0.553293	0	0	0
MGH101-P2-D04	-0.0733845	-1.34068	0	0	0.0800483	0	0	0	0.375299	0	0	0
MGH101-P2-D05	-1.69281	-1.99372	0	0	0	0	0	0.759689	0.00958904	0	0	0
MGH101-P2-D09	1.09793	-1.84769	0	0	0.83853	0	0	0	0.349861	0	0	0
MGH101-P2-D10	-0.503735	-1.72962	0	0.0107272	0.0207365	0	0	0	0.63059	0	0	0
MGH101-P2-D11	-1.62354	-1.43083	0	0.0148539	0.0614325	0	0	0	0	0	0	0
MGH101-P2-E01	-1.34958	-1.47377	0	0	0.0135192	0	0	0	0	0	0	0
MGH101-P2-E03	0.575809	-1.15414	0	0	0.0641051	0	0	0	0	0	0	0
MGH101-P2-E04	0.654683	-2.01711	0.817833	0	0.0913323	0	0	0	0.354812	0	0	0
MGH101-P2-E07	1.5086	-1.55367	0	0.0381911	0	0	0	0	0.218391	0	0	0
MGH101-P2-E08	-1.03081	-1.07958	0	0	0.0882887	0	0	0.272019	0.600348	0	0.451302	0
MGH101-P2-E09	-1.42749	-1.63699	0	0	0.0406701	0	0	0.09606	0.470189	0	0	0
MGH101-P2-E11	-1.41925	-1.3445	0	0.0181131	0.0569556	0	0	0.361009	0.320582	0	0	0
MGH101-P2-E12	0.560201	-0.844223	0	0.0391968	0.0684347	0	0	0	0.347627	0	0	0
MGH101-P2-F03	0.527424	-1.93605	0	0	0	0	0	0	0.203793	0	0	0
MGH101-P2-F04	-1.51232	-2.01534	0	0	0.506461	0	0	0	0.244753	0	0	0
MGH101-P2-F05	-1.49971	-1.53001	0	0	0	0	0	0	0.363947	0	0.407874	0
MGH101-P2-F08	1.32347	-0.990658	0	0	0.112365	0	0	0	0.515003	0	0	0
MGH101-P2-F09	-1.68121	-1.9186	0	0	0.0418882	0	0	0	0.485089	0	1	0
MGH101-P2-F10	-1.6493	-1.94616	0	0	0.06659	0	0	0	0	0	0.591115	0
MGH101-P2-F11	-0.682479	-1.50439	0.0300483	0.00794279	0.00501661	0	0	0	0.353569	0.205925	0	0
MGH101-P2-F12	-0.781718	-1.5868	0	0	0.0290105	0	0	0.160997	0.608825	0	0	0
MGH101-P2-G05	-0.855175	-1.75934	0	0	0	0	0	0	0.246602	0	0	0
MGH101-P2-G09	-1.18048	-0.9714	0	0	0.013122	0	0	0.0352872	0.605649	0	0	0
MGH101-P2-G11	-0.864894	-1.31306	0	0.00989469	0.0839243	0	0	0	0.434767	0	0	0
MGH101-P2-G12	1.86579	-2.0318	0	0.00878094	0.0103203	0	0	0	0	0	0	0
MGH101-P2-H08	-1.82344	-1.94731	0	0	0.0505578	0	0	0	0.252241	0	0.654294	0
MGH101-P2-H11	1.63809	-1.91693	0.278064	0.00961666	0.111368	0	0	0	0.427653	0	0	0
MGH101-P2-H12	-1.30567	-1.31693	0	0	0.0344718	0	0	0	0.458823	0.594366	0	0
MGH101-P3-A02	-0.493815	-1.45454	0	0	0.170872	0	0	0	0.429866	0	0.315874	0
MGH101-P3-A03	-0.166675	-1.54739	0	0	0.0569556	0	0	0	0.129228	0	0	0
MGH101-P3-A06	-1.17636	-1.71556	0	0	0.0826402	0	0	0.333657	0	0	0	0
MGH101-P3-A07	-1.73307	-0.917176	0	0.000287481	0.193479	0	0	0.646527	0.482662	0	0	0
MGH101-P3-A09	0.472473	-1.51684	0	0	0.0366174	0	0	0.5351	0.309872	0.103345	0	0
MGH101-P3-A10	-1.85287	-2.09505	0	0.0132103	0.148093	0	0	0	0.346027	0	0.263414	0
MGH101-P3-A12	0.0905146	-1.54874	0	0.0101725	0.0463524	0	0	0	0.477501	0	0	0
MGH101-P3-B01	-1.72833	-1.75732	0	0.0118334	0.0410188	0	0	0	0.462023	0.571641	0	0
MGH101-P3-B04	0.376807	-1.38638	0	0	0.105926	0	0	0	0.330062	0	0	0
MGH101-P3-B06	-1.48556	-1.72775	0	0.0284575	0.0348309	0	0	0	0.426461	0	0.0348841	0
MGH101-P3-B10	-0.315644	-1.70075	0	0	0.01881	0	0	0	0.494484	0	0	0
MGH101-P3-B11	-0.679738	-1.44688	0	0	0.069046	0	0	0	0.016133	0	0	0
MGH101-P3-C01	0.48354	-1.52843	0	0.0178429	0.10464	0	0	0	0	0	0	0
MGH101-P3-C03	0.549967	-1.20851	0	0	0.015887	0	0	0	0	0	0.427983	0
MGH101-P3-C05	-1.523	-1.30873	0	0	0.690923	0	0	0.568311	0.355002	0	0.74969	0
MGH101-P3-C07	1.10107	-1.96478	0	0	0.0877306	0	0	0	0	0	0	0
MGH101-P3-C09	-0.212951	-1.78158	0.408976	0.0210686	0.639901	0	0	0	0.324086	0	0	0
MGH101-P3-C10	0.611823	-1.80025	0	0.0229337	0.0360831	0	0	0	0.366327	0	0	0
MGH101-P3-C12	0.639958	-1.03052	0	0	0.165427	0	0	0	0.647988	0	0	0
MGH101-P3-D02	-1.11598	-1.62115	0	0	0.0528768	0	0	0	0.582237	0	0	0
MGH101-P3-D04	2.01194	-2.15158	0	0.0341328	0.0766896	0	0	0	0	0	0	0
MGH101-P3-D08	-1.96394	-1.81206	0	0.0333655	0.615652	0	0	0	0.396381	0	0.588129	0
MGH101-P3-D09	-0.0239075	-1.58257	0	0	0.079468	0	0	0.577305	0	0	0.798644	0
MGH101-P3-D10	0.414973	-1.49439	0	0.00878094	0.021311	0	0	0.453841	0.534106	0	0.341799	0
MGH101-P3-D11	1.37352	-2.14587	0	0	0.701298	0	0	0	0.368515	0	0	0
MGH101-P3-D12	-1.94668	-1.87885	0	0.0112808	0.0139157	0	0	0	0.310147	0	0	0
MGH101-P3-E01	-0.441937	-0.869795	0	0.0202656	0.0740233	0	0	0	0	0.26313	0	0
MGH101-P3-E03	1.779	-1.86857	0	0	0.0211197	0	0	0	0.419383	0	0.612408	0
MGH101-P3-E05	0.102487	0.76594	0	0.0181131	0.721637	0	0	0.193276	0.380025	0.675302	0	0
MGH101-P3-E07	-0.362011	-0.569187	0.401007	0.0110041	0.0653512	0	0	0.17477	0.503133	0	0	0
MGH101-P3-E08	-0.428815	-1.13584	0	0.0132103	0.0980908	0	0.00539154	0	0.392715	0	0	0
MGH101-P3-E09	0.480175	-1.72121	0	0	0.01881	0	0	0	0.231677	0	0.424499	0
MGH101-P3-E11	0.873143	-1.82686	0	0	0.0875908	0	0	0	0.354717	0.0133453	0	0
MGH101-P3-F01	-1.55511	-1.478	0.399914	0	0.0441321	0	0	0	0.433756	0.284209	0.621966	0
MGH101-P3-F02	-0.991146	-1.51325	0	0.0221359	0.0143114	0.828629	0	0.32725	0.379008	0	0	0
MGH101-P3-F03	-0.909033	-0.720016	0	0	0.448731	0	0	0	0.454701	0	0.63469	0
MGH101-P3-F04	0.96889	-1.4163	0	0.0493072	0.101783	0	0	0	0.542014	0	0	0
MGH101-P3-F05	-1.8417	-1.39524	0	0.0178429	0.250223	0	0	0	0.407566	0.642715	0.482535	0
MGH101-P3-F06	-1.50723	-1.72089	0	0.0115573	0.0335713	0	0	0.448424	0.439765	0.523168	0.66542	0
MGH101-P3-F12	-0.884117	-1.31542	0	0	0.0472002	0	0	0.318767	0.296146	0	0.00737779	0
[truncated: 4,865 more rows]
