# Supplementary material for: NF1 regulates mesenchymal glioblastoma plasticity and aggressiveness through the AP-1 transcription factor FOSL1
Source: eLife. 2021 Aug 17;10:e64846. doi: 10.7554/eLife.64846 (PMC8370767; doi:10.7554/eLife.64846)
Supplement: Figure 1—source data 1. [file elife-64846-fig1-data1.xlsx]

## Sheet: Figure_1A
# Source Data Figure_1A
Sample	PC1	PC2	Wang_2017	Richards_2021	Dataset
GSM1194851	-38.6848	-12.7592	MES	INJ	GSE49161
GSM1194852	11.9733	-20.7694	CL	DEV	GSE49161
GSM1194853	-35.7469	-12.5483	MES	INJ	GSE49161
GSM1194854	-55.5514	5.89481	MES	INJ	GSE49161
GSM1194855	14.01	-25.9126	CL	DEV	GSE49161
GSM1194856	2.21153	-27.9624	PN	DEV	GSE49161
GSM1194857	-3.87665	-24.1607	CL	DEV	GSE49161
GSM1194858	30.2927	5.94081	CL	DEV	GSE49161
GSM1194859	26.3422	8.15398	PN	DEV	GSE49161
GSM1194860	7.71739	9.99497	CL	DEV	GSE49161
GSM1194861	-13.6503	12.8723	CL	INJ	GSE49161
GSM1194862	-46.2719	50.2568	MES	INJ	GSE49161
GSM1194863	37.3773	3.30389	CL	DEV	GSE49161
GSM1194864	8.81271	22.9887	PN	INJ	GSE49161
GSM1194865	22.4391	-5.10579	PN	DEV	GSE49161
GSM1194866	24.3326	0.359471	PN	DEV	GSE49161
GSM1194867	8.27302	9.45268	PN	DEV	GSE49161
GSM1638621	-45.8396	17.5671	MES	INJ	GSE67089
GSM1638622	-42.4055	27.6232	MES	INJ	GSE67089
GSM1638623	-95.1867	-61.7157	MES	INJ	GSE67089
GSM1638624	37.8019	-20.5409	CL	DEV	GSE67089
GSM1638625	36.2892	-20.8417	CL	DEV	GSE67089
GSM1638626	22.6954	-50.4189	CL	DEV	GSE67089
GSM1638630	-2.98681	-20.1907	PN	DEV	GSE67089
GSM1638631	-22.9027	-56.3826	PN	INJ	GSE67089
GSM1638632	-5.43267	-19.6464	PN	INJ	GSE67089
GSM1638633	36.3563	-10.9953	CL	DEV	GSE67089
GSM1638634	37.1959	-13.5582	CL	DEV	GSE67089
GSM1638635	57.8198	28.8628	CL	DEV	GSE67089
GSM1638636	-32.4785	34.5015	MES	INJ	GSE67089
GSM1638637	-25.8695	42.9435	MES	INJ	GSE67089
GSM1638638	-31.6329	42.0163	MES	INJ	GSE67089
GSM1638639	37.8928	-21.7401	CL	DEV	GSE67089
GSM1638640	39.7271	-13.3667	CL	DEV	GSE67089
GSM1638641	39.3361	-26.2023	CL	DEV	GSE67089
GSM1638642	36.9908	-3.07702	CL	DEV	GSE67089
GSM1638643	40.358	5.7753	CL	DEV	GSE67089
GSM1638644	21.9271	-32.07	CL	DEV	GSE67089
GSM1638645	30.007	-15.2524	CL	DEV	GSE67089
GSM1638646	38.2347	-24.4332	CL	DEV	GSE67089
GSM1638647	30.4372	-24.2463	CL	DEV	GSE67089
GSM1638658	-40.8935	35.3892	MES	INJ	GSE67089
GSM1638659	-51.8211	14.4275	MES	INJ	GSE67089
GSM1638660	-34.3865	54.1625	MES	INJ	GSE67089
GSM1638661	-34.683	47.8586	MES	INJ	GSE67089
GSM1638662	-37.9026	42.3586	MES	INJ	GSE67089
GSM1638663	-38.6477	41.1925	MES	INJ	GSE67089
GSM198765	-3.85985	32.9715	MES	INJ	GSE8049
GSM198766	8.5779	36.0232	CL	INJ	GSE8049
GSM198767	42.3706	-12.9211	CL	DEV	GSE8049
GSM198768	-18.7366	-17.1216	MES	INJ	GSE8049
GSM198769	4.85529	-36.9077	PN	DEV	GSE8049
GSM198770	-26.4208	-16.3672	MES	INJ	GSE8049
GSM198771	-24.9271	-0.997534	MES	INJ	GSE8049
GSM198772	14.4078	-18.5986	PN	DEV	GSE8049
GSM198773	30.3253	-4.38094	PN	DEV	GSE8049
GSM198774	-0.179267	5.00401	MES	INJ	GSE8049
GSM198775	-37.9025	14.2113	MES	INJ	GSE8049
GSM198776	17.743	-17.6495	CL	DEV	GSE8049
GSM198777	-13.5717	12.5835	MES	INJ	GSE8049
GSM198778	6.5699	0.203629	PN	DEV	GSE8049
GSM198779	-37.8627	8.74956	MES	INJ	GSE8049
GSM198780	2.49986	2.43699	PN	DEV	GSE8049
GSM198781	36.111	12.7606	PN	DEV	GSE8049
GSM3384803	30.3652	7.6437	CL	DEV	GSE119834
GSM3384804	28.9501	4.24712	PN	DEV	GSE119834
GSM3384805	35.2731	5.54335	CL	DEV	GSE119834
GSM3384806	8.27908	3.50787	CL	DEV	GSE119834
GSM3384807	24.5404	-1.90925	CL	DEV	GSE119834
GSM3384808	15.1691	-3.66547	PN	DEV	GSE119834
GSM3384809	3.6025	8.91813	PN	DEV	GSE119834
GSM3384810	-24.8181	24.6147	MES	INJ	GSE119834
GSM3384811	-34.8744	25.2984	MES	INJ	GSE119834
GSM3384812	-53.4483	30.2396	MES	INJ	GSE119834
GSM3384813	-27.5118	16.3044	MES	INJ	GSE119834
GSM3384814	36.9148	-0.863773	CL	DEV	GSE119834
GSM3384815	-8.03352	12.8685	MES	INJ	GSE119834
GSM3384816	-11.957	14.0553	MES	INJ	GSE119834
GSM3384817	-29.91	9.72058	MES	INJ	GSE119834
GSM3384818	-24.0051	16.775	MES	INJ	GSE119834
GSM3384819	-4.97459	14.592	CL	INJ	GSE119834
GSM3384820	-4.40812	0.12411	MES	INJ	GSE119834
GSM3384821	6.75641	5.21546	CL	DEV	GSE119834
GSM3384822	5.15411	-6.69383	CL	DEV	GSE119834
GSM3384823	13.3671	-8.52394	CL	DEV	GSE119834
GSM3384824	-11.3947	-21.6068	CL	DEV	GSE119834
GSM3384825	33.384	-4.19933	PN	DEV	GSE119834
GSM3384826	-13.3354	6.9321	MES	INJ	GSE119834
GSM3384827	-76.493	-105.597	MES	INJ	GSE119834
GSM3384828	11.5477	3.69118	PN	DEV	GSE119834
GSM3384829	-39.7033	-47.5662	MES	INJ	GSE119834
GSM3384830	2.73155	9.25731	CL	DEV	GSE119834
GSM3384831	-56.7098	15.7922	MES	INJ	GSE119834
GSM3384832	14.4734	-32.5044	PN	DEV	GSE119834
GSM3384833	-19.5819	-0.0699276	MES	INJ	GSE119834
GSM3384834	-12.4308	-3.76079	MES	INJ	GSE119834
GSM3384835	26.8156	-6.0402	CL	DEV	GSE119834
GSM3384836	32.5957	-15.549	PN	DEV	GSE119834
GSM3384837	-30.3139	16.6857	MES	INJ	GSE119834
GSM3384838	-52.0435	9.54975	MES	INJ	GSE119834
GSM3384839	26.3122	-12.8216	PN	DEV	GSE119834
GSM3384840	32.0757	-15.5632	CL	DEV	GSE119834
GSM3384841	-9.55677	22.4583	PN	INJ	GSE119834
GSM3384842	31.8023	8.68545	CL	DEV	GSE119834
GSM3384843	20.601	9.30925	CL	DEV	GSE119834
GSM3384844	47.495	-13.3474	CL	DEV	GSE119834
GSM3384845	27.6166	-4.46854	CL	DEV	GSE119834
GSM3384846	29.6811	2.72118	CL	DEV	GSE119834
GSM4075051	-50.1225	-34.5749	MES	INJ	Freiburg
GSM4075052	-17.4101	-41.8716	CL	DEV	Freiburg
GSM4075053	-0.228227	-51.1528	CL	DEV	Freiburg
GSM4075054	-35.4395	-33.0486	PN	INJ	Freiburg
GSM4075055	-21.7447	-48.218	PN	DEV	Freiburg
GSM4075056	-21.6635	-40.2638	MES	INJ	Freiburg
GSM4075057	-36.8145	-39.0117	PN	INJ	Freiburg
GSM4075058	-45.501	-30.8102	MES	INJ	Freiburg
GSM4075059	-13.5549	-45.6379	CL	DEV	Freiburg
GSM4075060	-27.0652	-39.2276	MES	INJ	Freiburg
GSM4075063	23.8677	30.4486	CL	DEV	Freiburg
GSM4075064	33.2022	20.2158	PN	DEV	Freiburg
GSM4075065	43.5291	27.7004	PN	DEV	Freiburg
GSM4075066	51.9658	20.8856	PN	DEV	Freiburg
GSM4075067	-0.78557	42.2583	MES	INJ	Freiburg
GSM4075068	-13.3397	49.5808	MES	INJ	Freiburg
GSM4075069	-8.94098	49.5129	MES	INJ	Freiburg
GSM4075070	37.4571	27.7849	CL	DEV	Freiburg
GSM4075071	26.9092	29.5911	CL	DEV	Freiburg
GSM4075072	7.45251	43.3613	MES	INJ	Freiburg
GSM4075073	11.2115	43.5537	PN	INJ	Freiburg
GSM4075074	57.0155	18.9237	CL	DEV	Freiburg
SRS926534	-26.458	-6.03663	MES	INJ	SRP057855
SRS926535	-18.6272	0.973265	MES	INJ	SRP057855
SRS926536	-1.44357	-5.35205	CL	DEV	SRP057855
SRS926537	26.7141	-10.0931	PN	DEV	SRP057855
SRS926538	12.1966	-17.3038	CL	DEV	SRP057855
SRS926539	-20.9722	11.2639	MES	INJ	SRP057855
SRS926540	24.2171	-6.82601	CL	DEV	SRP057855
SRS926541	4.84621	8.01023	PN	DEV	SRP057855
SRS926542	16.4886	4.63613	PN	DEV	SRP057855
SRS926543	-23.1425	2.37165	PN	INJ	SRP057855
SRS926544	-21.5013	17.5641	MES	INJ	SRP057855
SRS926545	1.09669	2.49338	MES	INJ	SRP057855
SRS926546	14.611	7.25307	CL	DEV	SRP057855
SRS926547	11.9746	-8.9541	CL	DEV	SRP057855

## Sheet:  Figure_1B
# Source Data Figure_1B
Sample	MYO1C	SLC10A3	PROCR	CAST	MYH9	FOSL1	RAB27A	CYP1B1	MET	MYOF	AHNAK2	MAN1A1	FHOD1	PLAUR	GFPT2	AHNAK	TPBG	BNC2	P4HA2	PTGER4	TCIRG1	HPCAL1	PTGS2	LMNA	TRIM38	SDC4	GLT8D2	IL1R1	IER3	PLP2	DCBLD2	LRRC8E	PERP	FHL2	SMAGP	CD44	ANXA2	ARPC1B	FAM114A1	TGFBR2	MVP	MAFF	SERPINE1	ABL2	CAV1	MICAL2	MYLK	GCLM	FLII
GSM1194851	0.337	1.307	0.758	1.07	1.11	0.22	0.646	1.256	1.551	0.993	0.991	1.81	2.256	-1.091	1.425	1.322	-0.428	1.333	1.261	-0.096	0.405	1.196	-0.39	0.763	0.28	1.264	2.313	2.08	0.918	0.232	0.63	0.788	0.958	1.055	-0.619	1.058	0.953	1.128	0.968	1.152	0.77	0.471	1.46	1.017	1.424	1.32	1.3	0.559	0.383
GSM1194852	-1.18	-0.666	-0.545	-0.445	-1.545	-1.076	-1.165	-0.662	-0.534	-0.345	-0.216	0.082	-0.886	-0.34	0.424	-0.241	-0.823	-0.69	-0.089	-0.28	-0.613	-0.243	-0.306	-0.985	0.608	-0.474	-1.024	-0.702	-0.665	-0.446	-0.797	-0.215	-0.856	-1.273	-0.988	-0.743	-0.461	-1.609	-1.558	-0.399	0.5	-0.908	-1.098	0.053	-0.996	-1.085	-1.162	-1.348	-0.319
GSM1194853	2.026	1.596	2.408	0.779	1.776	-0.449	1.033	0.696	1.439	-0.944	-0.676	1.558	0.711	-0.025	1.642	-0.894	0.781	0.944	1.571	0.855	1.566	0.99	2.312	-0.161	1.68	-0.442	1.572	1.383	-0.387	0.868	-1.199	-0.3	1.172	0.618	-0.261	-0.92	0.113	0.502	1.004	0.029	-0.602	1.478	-1.404	-1.306	-0.06	-0.559	-0.777	0.09	0.949
GSM1194854	0.661	1.26	1.009	1.746	1.734	0.365	1.354	2.462	1.734	1.7	2.694	1.674	1.312	1.03	1.102	1.79	1.799	1.552	1.446	1.743	1.994	1.014	1.14	1.155	1.461	1.657	0.929	1.481	2.024	1.703	1.844	3.13	-0.154	1.168	0.647	1.67	1.09	1.241	1.58	1.38	2.028	0.933	1.378	2.626	1.362	0.313	1.457	1.395	0.967
GSM1194855	-1.548	-0.888	-0.626	-0.87	-1.623	-0.925	0.265	-0.6	-0.616	-1.066	-0.546	-0.69	-0.412	-1.043	-0.93	-1.046	0.292	-0.925	-1.699	-0.273	-0.429	-1.215	-0.524	-1.501	-1.214	-0.812	-0.84	-0.485	-0.444	-0.129	-0.293	-0.286	-0.939	-1.352	0.347	-0.843	-1.681	-0.567	-0.226	-1.153	-0.9	-1.256	-1.187	0.581	-1.501	-0.68	-1.202	0.054	-2.141
GSM1194856	-0.557	-0.558	-0.47	-0.426	0.357	0.061	-1.774	-0.908	-0.604	-0.749	-0.74	-0.474	-0.173	0.277	-0.042	-0.683	-1.014	-1.048	-1.246	2.047	-0.459	-0.37	-0.341	0.073	0.217	-0.496	-0.684	-0.789	-0.522	-1.249	-0.167	-0.214	-1.052	-1.08	-0.367	-1.261	-0.65	-1.111	-1.935	0.018	-0.01	-1.663	-0.782	0.296	-1.496	-0.725	-0.641	-0.306	0.063
GSM1194857	1.136	-0.355	-0.54	-0.145	-0.005	1.08	-0.374	-0.543	-0.365	0.586	0.076	-0.463	-0.564	0.94	-0.755	-0.377	-0.928	0.195	-0.891	-0.514	-0.16	0.523	-0.129	0.775	0.987	0.022	-0.221	-0.834	0.862	0.82	-0.347	-0.215	0.356	-1.191	1.188	0.416	0.188	1.076	-0.118	-0.556	0.555	-0.409	1	-0.607	-0.016	-0.108	0.072	-0.119	0.657
GSM1194858	-0.755	-0.897	-0.565	-0.37	-0.839	-0.586	-0.385	-0.361	-0.683	-0.831	-0.497	-0.489	-0.262	-0.908	-0.891	-1.166	1.07	-0.485	-1.034	-0.744	-0.855	-0.946	-0.569	-0.608	-1.001	-0.056	-0.643	-0.505	-0.743	-0.639	-0.881	-0.355	0.282	-0.292	0.099	-0.814	-0.273	-0.484	-0.499	-0.617	-0.856	-0.581	0.218	-0.741	-0.711	-0.606	-0.357	-0.511	-0.261
GSM1194859	-0.214	-0.869	-0.734	-0.713	-0.365	-0.111	-0.911	-0.073	-0.652	-0.807	-0.324	-1.005	-0.856	-0.166	-1.032	-0.604	-0.57	0.115	-0.763	-0.703	-0.746	-0.699	-0.572	-0.509	-1.132	0.446	-0.594	-0.16	-0.101	-1.117	-1.239	-0.722	-0.153	-0.107	-0.088	-0.751	0.401	-0.127	-0.42	-0.357	-0.999	0.587	0.766	-0.617	0.104	-0.671	-0.155	0.417	0.358
GSM1194860	-0.483	0.958	-0.057	0.496	-0.097	0.737	-0.162	-0.344	-0.582	0.79	-0.051	-0.016	-0.078	-0.367	-0.297	-0.537	-0.481	-0.983	0.11	-0.661	0.986	-0.241	-0.562	0.711	-0.371	0.458	0.351	-0.342	-0.604	0.362	-1.075	-0.779	1.769	0.757	0.318	0.889	0.708	0.105	-0.778	-0.237	0.217	0.878	0.566	-0.994	0.479	0.273	-0.01	0.142	-0.661
GSM1194862	0.646	1.19	2.103	1.364	0.812	3.059	1.736	1.899	1.893	1.573	2.123	1.214	1.531	3.15	1.584	1.799	2.106	2.086	0.984	1.679	1.418	2.605	2.552	1.463	1.87	1.865	1.504	0.014	2.482	1.619	1.611	1.593	2.179	1.575	3.172	1.778	1.088	0.796	1.575	2.041	1.722	1.686	1.682	1.041	1.314	2.306	0.345	2.226	2
GSM1194863	-0.764	-1.537	-0.448	-1.888	-0.598	-0.35	-0.81	-0.674	-0.664	-0.817	-0.679	-0.716	-0.864	-0.151	-0.807	-0.757	-0.826	-0.915	-0.207	-0.567	-0.863	-1.279	-0.474	-1.224	-0.332	0.379	-0.741	-0.902	-0.767	-0.737	-0.538	-0.616	-0.134	0.49	-0.677	-0.942	-0.118	-0.611	-0.439	-1.228	-0.923	0.027	-0.079	-1.074	-0.701	-1.035	-0.694	-0.662	-0.531
GSM1194865	-1.36	-0.75	-0.69	-0.931	-0.606	-0.832	-0.805	-0.897	0.658	-0.794	-0.696	-0.889	-1	-0.704	-0.997	-0.424	-0.042	-0.614	-0.599	-0.769	-0.903	-0.472	-0.275	-1.556	-0.876	-1.213	-0.371	-0.823	-0.367	-0.826	-0.021	-0.183	-0.291	0.456	-0.457	-0.401	-1.083	-1.611	-0.357	-1.317	-0.664	0.905	-0.872	-0.77	-0.799	-0.922	-1.052	-1.25	0.033
GSM1194866	-0.377	-0.592	-0.755	-1.239	-0.677	-0.648	-0.892	-0.775	-0.642	-0.906	-0.509	-0.976	-1.328	-0.249	0.101	-0.56	-0.932	-0.586	-0.644	-0.679	-0.769	-0.158	-0.518	-0.715	-0.79	-1.418	-0.734	-0.757	-0.609	-0.685	0.254	-0.147	-0.882	-1.132	-0.681	-0.901	-2.379	-0.671	-0.434	-1.055	-1.042	-1.043	-0.592	-0.612	-0.79	-0.521	-0.937	-0.917	-0.958
GSM1194867	0.75	0.252	-0.674	0.812	-0.477	-0.077	0.45	-0.273	-0.7	-0.444	-0.472	-0.694	-0.045	-0.299	1.036	1.191	-0.857	-0.044	0.525	-0.695	-0.59	0.036	-0.262	1.081	-0.535	-0.85	-0.676	0.628	-0.77	0.256	-0.217	-0.808	-0.531	-1.055	-0.423	0.724	0.385	0.299	0.151	0.788	-0.344	-1.029	-0.93	0.459	0.367	0.764	1.268	-1.259	-1.112
GSM1638621	0.991	1.234	0.791	1.102	0.654	1.237	0.49	0.74	1.394	1.024	0.476	1.349	1.238	1.382	1.602	1.173	1.317	0.73	0.761	0.762	1.305	0.39	1.193	0.237	0.7	0.873	0.822	1.396	0.97	0.863	-0.198	0.913	1.267	1.127	1.028	0.775	0.729	0.772	1.093	0.659	1.135	1.129	1.758	0.998	0.809	0.527	0.708	1.373	0.838
GSM1638622	1.146	1.056	0.916	1.269	0.905	1.276	0.886	0.703	0.986	1.064	0.529	1.331	1.208	1.424	1.295	1.297	1.349	1.289	0.991	1.063	1.173	0.355	1.841	-0.059	1.01	0.804	0.82	1.358	0.981	0.85	-0.135	1.047	1.33	1.021	1.119	0.896	0.711	0.956	1.635	0.757	1.11	0.925	1.861	0.801	0.858	0.24	1.009	1.565	0.847
GSM1638623	1.497	1.692	0.979	1.488	1.907	1.233	1.27	0.471	3.127	1.133	0.932	2.677	1.487	1.497	1.692	1.538	1.151	2.128	0.945	1.586	1.425	0.461	2.689	0.583	1.302	0.908	1.965	1.268	1.071	0.983	0.023	0.918	1.194	1.142	1.107	0.916	1.048	0.763	1.511	0.81	1.722	1.563	1.949	1.548	0.819	1.16	0.938	1.469	0.971
GSM1638624	-0.731	-0.498	-0.859	-0.554	-0.555	-0.696	-1.461	-0.789	-1.003	-0.525	-0.945	-0.754	-1.006	-0.897	-0.72	-0.685	-0.998	-0.884	-1.319	-0.972	-0.782	-0.631	-1.134	-0.55	-0.821	-1.459	-0.691	-0.642	-0.743	-1.004	-0.527	-0.249	-0.746	-0.97	-0.74	-0.404	-0.931	-0.92	-0.949	-0.778	-0.663	-1.001	-0.495	-0.958	0.041	-0.934	-1.067	-0.674	-1.163
GSM1638625	-0.604	-0.92	-0.828	-0.519	-0.913	-0.578	-1.148	-0.801	-0.425	-0.513	-0.872	-0.554	-1.225	-0.733	-0.746	-0.816	-0.879	-0.647	-1.402	-0.857	-0.929	-0.551	-0.913	-0.369	-0.918	-1.528	-0.712	-0.321	-0.682	-1.057	-0.56	-0.552	-1.063	-0.968	-0.648	-0.365	-0.897	-0.896	-1.001	-0.791	-0.806	-1.167	-0.545	-0.853	0.069	-0.984	-1.123	-0.518	-1.38
GSM1638626	-0.668	-0.375	-0.706	-0.225	-0.913	-0.741	-0.859	-0.696	-0.227	-0.739	-0.85	-0.389	-0.716	-0.869	-0.662	-0.691	-0.838	-0.051	-0.907	-0.617	-0.774	-0.646	-0.606	-1.164	-0.416	-1.241	-0.545	-1.407	-0.792	-1.147	-0.279	-1.626	-1.279	-0.986	-0.776	-0.488	-0.187	-0.848	-0.879	-0.812	-0.521	-0.818	-0.469	-0.973	-0.102	-1.036	-1.177	-0.74	-1.308
GSM1638630	-0.738	-0.393	-0.678	-0.374	0.077	-0.872	-0.339	-0.719	0.053	-1.299	-0.718	-0.665	0.632	-0.807	0.263	-1.316	-0.807	-0.357	1.106	-0.771	-0.662	-0.003	-0.349	0.228	-0.083	-0.052	-0.749	-0.47	-0.933	-0.563	-0.781	-0.47	-0.899	-0.949	-0.86	-1.756	-0.931	-1.137	0.271	-1.319	-0.834	-0.561	-1.364	-0.894	-1.835	-0.826	0.116	-0.771	-0.381
GSM1638633	-0.783	-1.719	-0.721	-1.399	-1.148	-0.874	0.435	-0.875	-1.639	-1.024	-0.893	-1.105	-1.149	-1.104	-0.969	-0.939	-0.767	-0.003	-1.358	-0.867	-0.409	-1.308	-0.396	-1.772	-0.947	-1.061	-0.638	-0.849	-1.102	-1.21	-1.08	-0.317	-0.79	-0.98	-0.548	-0.831	-1.804	-0.389	-1.953	-0.051	-0.727	-1.483	-1.205	-0.353	-1.975	0.143	-0.464	-0.523	-0.651
GSM1638634	-0.736	-0.722	-0.777	-1.607	-1.869	-0.815	-0.05	-0.771	-1.009	-1.16	-0.95	-0.886	-1.29	-0.966	-0.769	-0.823	-0.593	0.187	-1.678	-0.876	-0.541	-1.223	-0.71	-1.727	-0.848	-1.284	-0.435	-0.593	-1.06	-1.036	-0.984	-0.524	-0.658	-1.096	-0.732	-0.937	-2.104	-0.402	-1.753	-0.049	-0.772	-1.298	-1.532	-0.292	-2.11	-0.096	-0.525	-0.777	-0.845
GSM1638635	-1.117	-1.546	-0.942	-1.439	-1.325	-0.992	-0.264	-0.81	-1.306	-0.803	-0.958	-0.934	-1.335	-0.974	-0.881	-0.897	-0.704	-0.531	-1.01	-0.876	-0.466	-0.913	0.552	-1.873	-1.112	-0.575	-0.592	-0.667	-0.816	-0.916	-1.404	-0.922	-1.111	-1.08	-0.879	-0.527	-1.86	-0.486	-1.266	-0.064	-0.897	-0.837	-0.67	-0.706	-1.045	0.522	-0.66	-0.673	-0.312
GSM1638636	1.472	0.979	1.076	0.606	1.341	1.236	0.264	1.541	-0.134	1.089	0.85	0.417	1.14	0.757	2.238	0.791	0.924	-0.109	0.069	0.857	0.914	1.548	0.282	1.413	0.025	1.189	0.34	1.207	1.144	1.221	1.668	1.128	0.882	1.146	1.275	0.965	0.584	1.023	0.811	1.221	0.73	0.741	0.038	1.412	0.37	1.192	1.065	0.945	1.716
GSM1638637	1.593	0.521	1.104	0.558	1.192	1.176	0.516	1.609	0.957	1.086	0.894	0.438	0.999	0.69	2.289	0.829	1.011	0.223	0.088	1.042	0.656	1.559	0.405	1.254	0.131	1.219	0.352	1.11	1.07	1.107	1.611	1.133	0.788	1.123	1.137	0.977	0.479	0.95	0.66	1.116	0.639	0.844	0.061	1.446	0.325	0.921	1.146	1.019	1.578
GSM1638638	1.508	0.462	1.028	0.784	1.17	1.43	0.672	1.841	0.805	0.902	0.738	1.428	1.218	1.109	1.891	0.923	1.563	-1.027	0.627	1.003	0.44	2	1.48	0.545	0.606	1.191	0.045	1.232	1.547	1.055	1.143	1.099	1.061	0.478	1.255	1.021	0.481	1.194	0.869	1.621	0.614	1.448	0.764	1.541	0.164	1.022	1.008	0.882	1.667
GSM1638639	-0.935	-0.759	-0.836	-0.093	-0.717	-0.721	-1.128	-0.776	-0.939	-0.215	-0.497	-0.817	-1.141	-0.76	-0.147	-0.589	-0.861	-1.021	-0.093	-0.719	-0.931	-0.435	-0.997	0.01	-0.822	-0.662	-0.634	-0.765	-0.583	-0.611	-0.589	-1.012	-0.893	-0.569	-0.548	0.037	0.12	-1.043	-1.022	-0.554	-0.846	-0.453	-0.269	-0.939	0.46	-0.765	-1.104	-0.884	-1.04
GSM1638640	-0.853	-0.768	-0.638	0.166	-0.91	-0.635	-1.097	-0.769	-0.6	0.084	-0.357	-0.706	-0.898	-0.618	-0.132	-0.381	-0.907	-0.23	-0.181	-0.859	-0.863	-0.394	-0.83	0.082	-0.942	-0.439	-0.907	-0.878	-0.604	-0.538	-0.663	-0.692	-1.038	-0.731	-0.661	0.125	0.33	-0.989	-0.965	-0.321	-0.756	-0.75	-0.304	-0.708	0.659	-1	-1.169	-0.773	-0.658
GSM1638641	-0.983	-0.809	-0.885	-0.808	-0.613	-0.761	-1.016	-0.817	-0.455	-0.812	-0.692	-0.669	-0.931	-0.925	-0.721	-0.801	-0.723	-1.122	-1.194	-0.844	-1.162	-0.553	-1.21	-0.827	-0.597	-1.152	-0.513	-0.765	-0.93	-0.783	-0.506	-1.306	-0.566	-0.821	-0.601	-0.752	-0.641	-1.228	-1.224	-1.108	-0.882	-0.818	-0.618	-1.107	-0.561	-0.235	-1.178	-0.43	-1.14
GSM1638642	-0.584	-0.365	-0.832	-1.45	-0.876	-0.92	-0.388	-0.874	-0.98	-1.022	-0.858	-0.988	-0.471	-0.477	-0.767	-0.411	-0.853	-0.911	-0.514	-0.847	-0.61	-1.196	-1.08	-0.347	-0.883	0.042	-0.518	-0.667	-0.94	-0.725	0.157	-0.676	-0.672	-0.095	-1.028	-1	0.296	0.487	0.011	-0.229	-0.919	-0.74	-0.409	-0.642	0.287	-1.047	-0.693	-0.954	-0.118
GSM1638643	-0.623	-0.332	-0.631	-1.218	-0.937	-0.845	-0.589	-0.771	-0.7	-0.945	-0.717	-0.767	-0.394	-0.412	-0.862	-0.375	-0.845	-0.504	-0.461	-1.145	-0.681	-1.251	-0.76	-0.616	-0.704	-0.224	-0.722	-0.456	-1.034	-0.812	0.175	-0.536	-0.549	-0.121	-1.049	-0.973	0.211	0.578	-0.047	-0.173	-0.925	-0.758	-0.305	-0.521	0.23	-0.86	-0.702	-0.723	-0.082
GSM1638644	-1.152	-1.073	-0.773	-0.175	0.214	-0.713	-1.209	-0.703	-0.816	0.033	-0.895	-0.852	-1.09	-0.763	-0.555	-0.636	-0.847	-0.183	-0.035	-0.596	-0.97	-0.385	-0.182	-0.703	-0.85	-1.107	-0.563	-0.804	-0.438	-0.257	-1.816	-0.839	-0.709	-1.14	-0.785	0.306	-0.39	-0.683	-0.201	-1.039	-0.868	0.095	-0.438	-0.797	0.664	-0.841	-1.222	-1.355	-0.646
GSM1638645	-0.346	-0.15	-0.795	-1.205	-1.276	-0.784	-0.437	-0.777	-0.554	-1.018	-0.54	-0.512	-0.394	-0.605	-0.681	-0.588	-0.736	-0.462	-0.479	-1.012	-0.695	-1.083	-0.756	-0.527	-0.676	-0.176	-0.854	-1.2	-1.021	-0.91	0.585	-1.216	-0.58	-0.129	-1.024	-1.095	0.473	0.506	0.034	-0.33	-0.622	-0.71	-0.408	-0.32	0.222	-1.125	-0.626	-1.035	-0.075
GSM1638646	-0.952	-0.762	-0.722	-0.416	-0.675	-0.797	-1.074	-0.762	-0.472	-0.563	-0.922	-0.859	-1.239	-0.772	-0.593	-0.581	-0.834	-1.148	-0.926	-0.633	-0.936	-0.939	-0.863	-1.202	-0.971	-1.23	-0.618	-0.775	-0.499	-0.901	-0.615	-0.762	-0.642	-0.908	-0.729	-0.59	-0.296	-1.22	-0.903	-0.696	-0.693	-1.094	-0.43	-1.083	-0.095	-1.209	-1.141	-1.024	-1.401
GSM1638647	-0.912	-0.905	-0.824	-0.409	-0.589	-0.783	-1.102	-0.8	-0.268	-0.705	-0.61	-0.686	-0.645	-0.616	-0.919	-0.659	-0.903	-0.352	0.139	-0.679	-0.884	-0.503	-0.666	-0.496	-0.665	-0.474	-0.8	-1.123	-0.149	-0.212	-1.615	-1.069	-0.51	-0.786	-0.667	0.168	-0.112	-0.859	-0.398	-1.07	-0.839	-0.347	-0.218	-0.978	0.742	-0.99	-1.186	-1.548	-0.856
GSM1638658	1.002	1.255	1.433	1.166	0.938	1.274	1.602	1.325	0.28	1.334	1.632	1.295	1.042	1.397	-0.08	1.681	1.091	-0.172	1.146	1.013	1.429	1.374	0.863	1.228	1.455	1.26	0.715	1.076	1.354	1.321	0.864	1.225	1.43	1.23	0.851	1.265	1.07	1.119	0.759	0.817	1.551	1.162	1.364	1.1	0.855	1.322	1.24	1.014	1.044
GSM1638659	0.792	1.543	1.43	1.165	0.688	1.288	1.058	1.348	0.135	1.349	1.637	0.765	1.075	1.363	-0.164	1.66	1.094	1.426	1.15	0.716	1.41	1.372	1.003	1.488	1.205	1.341	0.267	0.865	1.292	1.276	0.828	1.275	1.398	1.234	0.989	1.186	1.03	1.22	0.681	0.765	1.288	1.174	1.422	1.207	0.914	1.141	0.97	0.81	1.073
GSM1638660	1.053	1.308	1.487	1.123	0.88	1.535	1.694	1.599	0.228	1.489	1.655	0.953	0.887	1.373	-0.063	1.41	1.348	-0.146	1.271	1.044	1.42	1.436	1.23	1.51	1.323	1.377	0.236	0.852	1.402	1.187	0.184	1.221	1.333	1.084	1.172	1.358	0.615	1.141	0.669	0.587	1.765	1.71	1.349	1.75	0.995	0.932	1.189	0.788	1.224
GSM1638661	1.019	0.983	1.319	1.221	0.966	0.859	1.205	1.056	0.45	1.059	1.433	1.12	0.781	1.061	0.021	0.8	1.16	1.437	0.925	1.732	1.309	0.787	0.352	0.83	1.697	1.003	2.106	1.227	1.165	1.369	1.474	1.488	1.242	1.407	1.445	1.094	1.371	1.052	1.032	1.446	1.185	0.753	0.609	0.517	0.705	1.294	1.269	1.348	0.66
GSM1638662	0.975	1.064	1.352	1.184	0.874	0.953	1.178	0.857	0.7	1.059	1.456	0.765	0.564	1.05	-0.038	0.796	1.138	2.302	0.764	1.59	1.311	0.886	-0.159	1.089	1.93	0.851	2.265	1.103	1.055	1.352	1.685	1.073	1.117	1.391	1.534	1.062	1.36	1.13	0.952	1.502	1.163	0.896	0.565	0.66	0.689	1.681	1.201	1.289	0.868
GSM1638663	1.021	1.143	1.347	1.259	1.106	0.771	1.745	0.799	0.263	1.044	1.512	0.688	0.826	1	-0.091	0.819	1.161	1.811	0.925	1.525	1.189	0.837	0.142	0.918	1.686	1.074	2.205	1.32	1.032	1.413	1.547	1.278	1.08	1.409	1.315	1.016	1.4	1.141	1.274	1.458	1.086	0.946	0.458	0.721	0.727	1.54	1.204	1.194	0.696
GSM198765	0.898	0.62	3.466	0.482	0.193	0.115	1.343	0.539	0.763	0.926	1	1.752	1.526	2.107	1.779	0.325	1.259	1.826	0.623	0.576	-0.691	-0.158	1.898	0.146	1.157	0.965	0.236	0.678	0.78	1.016	0.627	-0.136	-0.044	1.171	0.535	0.262	0.749	1.121	1.644	1.075	0.618	0.145	0.343	-0.474	0.809	2.484	0.738	1.332	1.605
GSM198767	-0.968	-1.275	-0.719	-0.406	-1.096	-1.788	-1.064	-1.096	-1.256	-1.619	-1.28	-0.743	-0.369	-0.935	-1.039	-0.969	-0.997	-1.042	-1.584	-0.96	-0.723	-0.247	-0.705	-1.189	-1.049	-1.702	-0.854	-1.138	-0.898	-1.414	-1.645	-0.964	-1.66	-0.901	-0.83	-1.665	-1.939	-0.938	-1.517	-1.434	-1.934	-2.152	-2.379	0.103	-1.511	-0.374	-1.909	-0.754	-0.619
GSM198768	0.555	-0.229	0.148	0.804	1.835	0.836	-0.006	0.33	1.531	0.79	-0.416	-0.663	0.987	-0.256	-0.172	1.029	-0.498	1.457	0.232	0	-0.723	-0.467	-0.38	1.011	0.042	0.039	1.028	1.85	-0.633	-0.078	0.146	0	1.241	0.036	1.115	0.996	0.872	0.052	-0.652	1.307	0.022	-0.866	-0.255	-1.241	1.131	0.52	1.518	-1.311	-0.275
GSM198769	-0.911	-1.021	-0.652	-1.368	-0.416	-0.453	-1.249	-0.824	-0.478	-1.43	0.129	-0.526	-0.585	-0.799	-0.545	-0.809	-0.125	-0.701	-0.556	-0.915	0.566	-0.273	-0.706	-1.06	0.609	-0.493	-0.574	-0.552	-0.613	-0.006	-0.782	0.339	-0.198	-0.537	-0.868	-1.393	-0.231	-0.205	-1.257	-0.782	-1.403	-0.641	-1.166	-1.79	-1.239	-0.885	-1.593	-1.483	-0.182
GSM198770	2.043	0.154	-0.09	0.932	1.969	0.068	1.309	0.688	-0.586	0.839	-0.311	0.483	2.069	0.95	-0.834	2.098	0.818	-0.298	1.545	1.496	0.405	2.424	1.484	1.599	1.354	0.121	1.852	-0.52	-0.45	0.782	0.855	-0.567	1.187	0.158	0.552	0.678	0.715	1.74	0.211	1.267	0.474	0.671	0.477	0.748	-0.189	1.368	0.974	0.483	0.596
GSM198771	1.134	0.572	0.62	1.162	0.357	1.425	0.869	0.533	1.037	0.787	0.849	0.31	1.362	0.962	1.122	2.09	1.872	1.25	0.391	0.524	2.234	1.577	-0.271	1.395	1.001	0.68	1.837	0.856	1.793	0.95	1.45	2.197	0.647	1.41	1.91	0.861	0.864	1.492	0.729	0.924	1.645	-1.458	1.422	-0.828	1.112	-0.107	0.669	-0.61	1.987
GSM198772	-0.632	-0.764	-0.594	-0.656	-0.217	-0.567	-0.621	-0.782	-0.66	-0.515	-0.903	-0.843	-0.388	-0.837	-0.281	-0.265	-0.917	-0.783	-0.144	-0.909	-0.652	-0.862	-0.64	-0.591	-1.063	-0.689	-0.602	-0.783	-0.53	-0.32	-1.278	-0.51	0.159	-0.547	-0.863	-0.646	0.343	0.135	-1.455	0.082	-0.306	-1.042	-0.47	-0.1	-0.44	-0.824	-1.247	-1.856	0.397
GSM198773	-1.3	-0.971	-0.692	-1.447	-0.089	-1.343	-0.95	-0.961	-1.132	-0.149	-1.159	-0.493	-0.369	-0.787	-1.063	-1.058	0.921	-0.796	-1.061	-0.845	-0.767	-0.573	-0.709	-1.127	-0.984	-1.193	-0.688	-1.082	-0.375	-1.405	-0.587	-0.602	-1.203	-0.679	-0.779	-0.94	-0.748	-1.644	-0.529	-0.981	0.096	0.185	-0.688	-0.26	-0.121	-0.443	0.635	-0.564	0.064
GSM198774	0.455	0.232	0.459	0.022	0.389	0.705	1.052	-0.271	0.43	0.471	2.132	0.764	0.347	0.983	1.295	-0.67	0.571	1.166	-0.587	-0.317	-0.547	0.019	0.283	0.827	-0.147	1.002	-0.353	0.022	-0.018	0.888	0.866	-0.351	0.353	1.302	0.487	0.597	0.721	0.407	0.201	0.846	0.037	0.239	1.48	0.755	0.709	0.328	0.656	0.77	1.078
GSM198775	0.878	2.272	-0.225	1.6	-0.937	0.942	1.422	1.646	1.348	0.956	0.824	1.619	-0.873	0.845	1.366	0.39	-1.053	-0.109	1.558	1.527	1.057	0.246	0.876	-0.555	1.619	1.296	-0.618	0.342	1.473	1.012	-0.408	2.308	1.054	-0.322	-0.232	1.078	0.249	0.012	1.51	-0.595	0.687	1.485	-0.266	1.185	0.129	0.378	-0.048	1.582	1.216
GSM198776	-0.998	-0.723	-0.584	-0.901	-1.081	-0.866	-1.213	-1.027	-0.909	-1.14	-1.064	-0.883	-0.97	-0.926	-0.764	-0.629	-0.901	-0.552	-0.834	-0.907	-0.429	-0.913	-0.692	-0.044	-1.235	-1.726	-0.845	-1.112	-0.638	-1.695	-0.981	-0.291	-1.743	-0.902	-0.918	-1.223	-1.788	-0.85	-0.404	-1.425	-1.792	0.349	0.406	0.241	-1.21	-0.832	-1.628	-0.095	-1.284
GSM198777	1.017	1.099	0.165	1.14	1.758	1.017	0.867	0.471	0.448	0.926	-0.131	-0.934	0.796	0.46	-0.532	0.349	-1.049	0.641	0.677	1.894	-0.474	-0.144	-0.503	1.258	-0.037	0.943	0.655	1.378	-0.311	0.482	-0.017	-0.521	0.208	0.798	1.55	1.204	0.834	0.204	-0.101	0.857	0.315	1.052	0.583	0.081	1.254	1.563	0.375	-0.307	-0.906
GSM198778	-0.156	-0.35	-0.66	-0.469	-0.171	0.728	-0.544	-0.5	-0.283	-1.402	1.068	-0.519	-0.514	-0.841	0.119	-0.633	-0.223	-1.01	-0.803	-0.093	-0.595	-0.261	-0.766	-0.255	-1.007	0.419	-0.817	0.467	-0.977	0.029	-0.184	-0.602	-1.761	-1.043	-0.549	-0.536	-0.349	-0.146	-0.022	-0.456	0.145	0.58	0.022	-0.782	-1.4	-0.824	-0.062	0.456	-1.355
GSM198779	0	0.636	0.512	0.455	-0.707	1.146	0.012	2.486	-0.022	0.918	1.013	0.319	-0.005	1.3	1.378	0.521	1.398	0.889	1.265	0.876	1.829	1.759	2.202	1.029	1.361	1.31	1.593	1.318	2.081	0.513	1.736	1.404	0.435	2.147	1.252	0.974	0.802	1.088	1.567	-0.073	1.654	1.519	0.897	2.493	1.154	-0.274	-0.038	1.196	-0.792
GSM198780	-0.391	-0.064	-0.483	-0.56	-0.889	-0.404	-0.691	-0.219	-0.906	-0.223	-0.182	-0.99	-0.911	-0.874	-0.118	-0.842	-0.828	-0.97	0.425	-0.954	-0.654	-1.205	-0.782	-0.195	-0.582	-0.022	-0.283	-1.09	-0.807	-0.1	-0.482	-0.554	0.765	-1.094	-1.129	0.039	0.265	-0.594	0.364	-0.063	-0.35	0.257	0.571	0.678	0.29	-1.139	0.09	0.618	-0.235
GSM198781	-1.541	-1.421	-0.406	-1.539	-0.726	-1.598	-1.128	-0.94	-1.071	-1.086	-1.227	-0.604	-0.921	-0.745	-1.337	-0.882	0.661	-1.102	-1.584	-1.142	-0.925	-0.8	-0.662	-1.249	-0.933	-1.05	-0.9	-1.07	-0.761	-1.734	-0.673	-0.749	0.358	-0.734	-0.99	-1.138	-1.842	-1.832	-0.813	-1.465	-0.28	0.18	-1.348	-0.258	-1.167	-0.496	0.449	0.223	-0.688
GSM3384803	-0.774	-0.805	0.089	-0.849	-1.074	-1.381	-1.201	-0.797	-1.155	-1.109	-0.896	-1.087	-0.755	-1.24	-1.215	-1.27	-0.949	-0.93	-1.008	-0.64	-0.382	-0.86	-0.837	-0.556	-1.003	-1.249	1.431	-0.885	-1.084	-0.114	-1.311	-0.882	-1.189	-0.312	-0.753	-1.188	0.069	-0.026	-0.673	-0.906	-0.569	0.11	-0.742	-1.277	-1.463	-0.631	-1.274	-0.827	-0.922
GSM3384804	-0.807	-0.383	-0.948	-1.363	-0.848	-1.386	-0.956	-0.948	-1.155	-1.505	-1.052	-1.074	0.587	-0.824	-0.39	-1.772	-0.928	-0.928	-1.034	-0.643	-1.112	-0.234	-0.793	-1.528	-1.081	-1.7	-0.553	-0.907	-0.96	-2.553	-0.599	-0.049	-1.525	-1.321	-1.12	-1.48	-1.957	-2.126	-0.717	-0.932	-1.755	-1.072	-1.547	-1.612	-1.379	-1.395	-0.82	-0.891	-1.54
GSM3384805	-1.758	-1.017	-0.616	-0.75	-1.03	-0.749	-1.286	-0.975	-1.139	-0.973	-0.887	-1.026	-1.217	-0.805	-1.104	-1.317	-0.931	-0.86	-1.227	-0.645	-1.059	-0.796	-0.837	-1.334	-1.267	0.048	-0.894	-0.92	-0.818	-1.582	-1.339	-0.139	-1.519	0.085	-0.352	-0.389	-0.246	-1.575	-0.871	-1.483	-1.092	-0.312	-0.971	-1.366	-0.974	-1.027	-0.922	-1.045	-1.868
GSM3384806	-0.771	-0.255	0.519	0.387	-0.669	-0.121	0.75	-0.525	-0.814	-0.327	0.323	-1.028	0.215	-0.354	-0.876	-0.224	0.659	-0.384	-0.152	-0.633	-0.307	-0.143	-0.81	0.172	-1.276	-0.587	-0.047	-0.17	0.006	0.197	-0.845	-0.501	0.855	0.079	0.032	0.226	0.34	0.545	-0.29	-0.34	0.188	-1.318	0.107	-0.204	0.266	0.413	-0.24	-1.217	-0.464
GSM3384807	-1.303	-1.181	-0.57	-0.731	-1.293	0.096	-0.742	-0.756	-1.135	-0.834	-0.938	-0.221	-1.184	-1.064	-0.364	0.024	-0.964	-0.869	-0.128	-0.628	-1.195	-0.365	-0.826	-0.659	0.221	0.695	-0.509	-0.823	-0.511	-0.414	-0.064	-0.735	0.175	-0.816	-0.043	-0.102	0.181	-1.007	-0.799	-1.256	-0.202	-0.828	0.261	-0.695	-1.148	-0.541	-1.126	-0.5	-0.293
GSM3384808	-0.676	-0.855	-0.924	-0.651	0.255	-0.825	0.025	-0.564	-0.561	-0.291	-0.965	-1.058	-0.701	-0.139	-1.184	-0.526	-0.928	-0.901	-0.509	-0.54	-1.154	-0.55	0.243	0.439	0.999	-0.838	-0.53	-0.323	-0.958	0.385	-0.437	-0.909	0.058	-1.222	-0.374	-1.797	-1.927	-0.512	-1.059	-0.126	-1.668	-1.643	-0.801	0.072	0.162	0.426	0.79	-1.372	-1.525
GSM3384809	0.237	1.034	-1.19	1.035	0.837	0.885	-0.928	-0.895	-0.195	0.53	0.346	-0.208	0.585	-0.937	-1.21	0.505	-0.836	-0.92	0.369	-0.611	0.006	-0.294	-0.826	0.891	-1.093	0.077	-0.663	0.037	0.897	1.197	-1.196	-0.266	1.157	0.753	0.187	1.01	0.406	0.39	-1.359	-0.892	-0.459	-0.305	0.29	-0.963	0.534	0.737	-0.785	-0.472	1.062
GSM3384810	1.328	1.966	1.293	1.845	1.365	1.31	0.689	0.71	1.033	1.45	2.088	1.014	1.26	1.657	2.13	0.687	0.914	0.672	1.682	1.155	0.992	1.007	0.231	1.067	0.517	1.46	-0.449	1.096	-0.289	1.308	2.121	1.516	0.448	1.445	0.304	1.422	1.241	0.212	1.072	1.432	1.156	0.68	0.923	1.511	0.526	1.634	1.304	0.538	1.822
GSM3384811	0.406	0.415	0.161	2.316	0.973	1.227	2.302	0.121	1.349	1.474	0.239	0.28	-0.051	0.589	1.115	1.106	1.269	0.722	0.958	1.427	1.451	1.465	0.132	0.422	1.17	1.694	0.768	1.384	1.415	0.823	2.067	0.46	0.997	1.843	0.768	1.018	1.195	0.423	1.04	1.756	0.802	1.044	1.257	1.05	0.975	0.375	2.443	0.864	0.498
GSM3384812	0.901	2.158	1.571	1.354	1.191	1.547	0.367	0.209	1.453	1.436	0.223	0.603	0.404	1.489	1.052	0.453	0.665	-0.07	0.774	-0.109	1.453	1.826	1.831	0.643	1.582	0.759	1.195	0.082	1.46	0.925	0.927	2.155	1.064	1.195	0.922	0.959	0.981	1.514	1.021	0.498	0.532	1.992	1.095	0.677	1.117	0.498	1.382	1.416	1.149
GSM3384813	0.657	2.106	1.235	0.893	1.225	1.002	0.84	2.3	0.605	1.222	1.085	1.595	1.089	1.732	1.441	0.949	1.296	1.007	1.015	1.375	1.003	0.971	1.553	1.735	0.542	0.643	0.792	1.746	1.117	1.285	0.684	2.538	0.701	0.885	0.661	0.79	0.85	0.755	-0.053	1.404	0.781	0.881	0.821	1.451	0.972	1.691	0.379	1.808	0.797
GSM3384814	-1.438	-0.916	-1.002	-0.328	-0.882	-0.771	-0.876	-1	-1.084	-1.011	-1.039	-1.023	-1.201	-1.169	-0.74	-1.134	-0.948	-0.713	-1.366	-0.599	-1.202	-1.01	-0.823	-0.589	-0.718	-0.948	-0.797	-0.893	-1.102	-1.237	-0.836	-0.905	-0.508	-0.649	-1.504	-1.029	-0.602	-1.09	-1.648	-0.961	-0.578	-1.188	-0.611	-0.578	-0.635	-1.089	-1.52	-0.581	-1.097
GSM3384815	0.102	0.445	1.167	1.458	1.111	1.183	0.103	0.746	1.691	0.842	1.159	1.788	0.456	1.068	1.103	0.664	1.167	1.344	0.666	1.014	0.734	0.445	-0.591	0.455	0.748	0.373	0.741	-0.05	1.088	0.486	2.11	0.637	1.243	1.209	0.456	1.254	1.023	0.568	0.335	0.634	1.078	-0.738	1.795	1.007	1.372	0.273	1.218	0.633	0.55
GSM3384816	0.337	-0.104	0.923	0.643	0.909	0.739	0.949	0.872	1.353	0.493	0.15	0.496	0.552	1.669	1.574	0.488	0.84	-0.128	0.552	-0.128	0.5	0.295	1.35	0.534	-0.681	0.807	-0.332	1.202	1.146	0.538	1.74	0.78	0.307	1.219	0.747	1.012	0.993	0.911	0.572	0.346	0.959	1.118	1.604	1.496	0.685	1.215	0.893	0.113	0.254
GSM3384817	1.603	1.5	1.186	1.108	1	1.546	1.524	0.873	2.347	0.387	1.419	2.089	0.254	-0.138	1.668	1.256	1.414	1.319	1.212	1.448	1.092	1.315	1.698	0.977	1.286	0.925	0.467	1.276	-0.173	1.014	0.753	0.937	0.408	-0.164	0.986	0.798	1.314	1.103	2.101	1.117	0.838	1.321	0.421	0.28	1.424	0.031	0.975	1.366	1.147
GSM3384818	0.248	1.217	0.616	1.362	0.31	0.619	0.878	1.085	0.975	0.968	1.222	0.299	1.51	0.755	2.12	0.525	1.201	0.02	1.12	-0.621	0.494	1.346	-0.202	0.703	0.288	1.087	0.333	1.498	1.837	1.082	0.285	1.387	0.192	0.55	1.874	0.984	0.795	1.05	0.638	0.116	0.93	0.44	1.213	0.799	0.896	-0.027	-0.447	0.575	0.499
GSM3384820	1.398	0.636	0.939	0.584	0.999	0.664	0.46	0.427	-0.036	0.604	1.962	1.249	0.589	-0.093	0.364	1.476	1.543	2.169	1.15	0.125	0.006	0.109	-0.315	0.448	1.117	1.374	1.261	2.441	-0.437	-0.267	0.416	1.186	1.21	0.837	0.859	1.02	0.883	0.659	0.6	0.38	1.162	-0.261	0.427	0.137	1.396	-0.581	-0.558	-0.57	0.97
GSM3384821	-0.488	0.087	-0.317	-0.218	-0.315	-0.399	-0.951	-0.532	0.263	0.011	-0.852	0.512	0.44	0.404	0.671	-0.79	1.222	0.703	0.439	0.262	0.245	-0.933	1.34	0.602	1.111	0.097	0.745	-0.349	0.556	0.328	0.536	0.481	0.105	-0.981	1.402	-0.213	-0.437	1.128	-0.024	-0.482	-0.762	-1.11	0.14	-0.674	0.177	0.199	-0.523	0.034	-0.032
GSM3384822	-0.514	-0.527	-0.685	-0.388	-0.115	-1.1	0.212	-0.233	-0.773	-0.835	-0.849	-0.542	-0.095	-0.74	-0.66	0.266	0.469	-0.832	-0.361	-0.384	-0.403	-0.5	-0.709	-0.727	0.801	-0.527	-0.206	-0.562	-0.654	-0.915	0.386	-0.529	-0.643	-0.274	-0.888	0.073	-1.043	-0.457	-0.071	-0.442	0.487	-0.591	-0.13	-0.353	-1.284	-0.835	-0.35	-0.986	-0.493
GSM3384823	-1.166	-0.196	-1.02	-0.203	-0.814	0.124	-1.044	-0.711	0.474	-0.033	-0.379	0.027	-0.934	0.064	-0.822	-1.154	-0.816	-0.908	-1.27	-0.53	-0.1	-0.808	-0.704	-0.188	-1.094	-0.311	-0.386	-0.604	-0.657	-0.866	-1.356	-0.956	-1.35	-0.11	-1.627	0.272	-1.141	-1.435	-0.38	-0.431	0.8	-0.494	0.025	0.26	-0.388	-0.609	0.575	0.019	-0.116
GSM3384824	-0.459	0.017	0.257	-0.115	-1.063	0.178	0.183	-0.059	0.094	-0.443	0.517	0.15	0.213	0.266	-0.113	-0.037	-0.353	0.519	0.015	-0.119	0.755	-0.349	-0.081	-0.321	-0.535	1.227	-0.658	0.233	-0.538	-0.258	0.483	-0.884	-0.849	-0.445	-0.208	0.549	0.308	-0.505	-0.836	-0.084	-0.072	0.127	-0.241	-0.47	-0.116	-0.343	-0.051	0.043	0.191
GSM3384825	-0.998	-1.047	-1.152	-1.52	-0.847	-1.362	-1.176	-0.811	-0.852	-0.602	-0.81	0.172	-1.197	-1.097	-0.758	-0.951	-0.727	-0.715	-0.971	-0.617	-1.174	-1.295	-0.626	-0.995	-0.375	-0.671	-0.66	-0.806	-0.373	-0.155	-0.314	-1.063	-0.915	-0.936	-0.788	-0.743	-0.545	-1.084	-0.743	-0.809	-0.937	-0.828	-0.348	-0.441	-1.161	-0.501	-0.533	-1.806	-0.409
GSM3384826	0.183	0.669	0.682	0.13	-0.796	-0.17	1.661	2.627	0.442	0.182	0.524	-1.042	-0.32	0.677	0.428	-0.264	1.24	0.594	0.292	-0.498	1.029	0.431	1.024	0.967	-0.12	0.1	-0.549	2.02	1.077	0.592	0.188	0.901	0.586	-0.071	0.411	0.099	0.355	1.236	-0.076	-0.237	0.901	0.076	-0.327	1.236	-0.678	0.109	0.791	2.052	-0.243
GSM3384827	0.708	-0.079	0.55	0.121	0.466	-0.166	1.452	0.508	0.651	1.054	0.679	1.277	-0.44	0.19	1.154	1.207	0.635	1.888	1.035	0.72	0.509	-0.539	-0.176	0.789	0.586	1.103	1.231	0.942	0.375	-0.103	0.638	0.635	0.258	0.254	-0.386	0.17	0.884	1.267	0.431	1.373	0.549	0.465	1.046	0.331	0.947	0.624	0.101	0.386	0.367
GSM3384828	0.307	-0.629	-0.117	-0.296	-0.369	-0.551	-0.433	0.109	-1.083	-0.307	-0.371	-0.822	0.116	-0.805	0.722	0.239	-0.941	-0.371	0.736	-0.607	-0.986	-0.469	-0.097	-0.371	0.081	-0.987	-0.389	-0.574	-1.069	-0.314	-1.11	-0.578	-1.068	-1.036	-0.932	-0.34	0.002	-0.155	0.426	0.406	-0.69	-0.798	-0.614	-0.294	-0.046	-0.227	0.071	-0.583	-0.258
GSM3384829	0.087	0.806	-0.914	0.189	0.337	1.287	0.581	-0.625	1.272	0.492	1.205	0.676	-0.68	-0.17	1.22	1.189	-0.766	0.502	0.198	-0.302	0.298	-0.119	1.975	-0.393	-0.878	0.53	-0.539	1.4	1.918	0.828	1.187	0.755	1.25	-0.207	-0.77	1.367	0.328	-0.391	0.289	-0.847	-0.83	1.963	0.763	2.294	-0.499	-0.023	0.569	1.303	0.434
GSM3384830	0.196	0.515	0.086	0.27	-0.796	0.267	-0.639	0.074	-0.397	0.72	1.192	0.186	0.339	-0.242	-0.534	0.508	-0.848	0.163	1.244	-0.352	0.271	-0.173	-0.305	0.224	-1.294	0.944	-0.623	-0.071	1.025	0.615	-0.051	1.003	-0.782	-0.863	-1.001	0.47	0.738	0.515	0.918	-0.293	1.433	0.149	0.397	0.192	0.436	-0.23	-0.652	0.059	1.219
GSM3384831	2.298	1.27	1.473	1.603	2.336	0.997	-0.136	1.991	0.695	2.076	2.267	2.352	1.937	2.122	0.437	1.81	1.708	1.934	1.972	3.612	2.48	2.402	0.108	1.523	1.567	1.046	2.933	1.094	1.34	0.809	1.531	1.113	2.303	2.207	1.493	0.902	1.36	1.043	2.416	2.573	2.058	1.792	2.146	0.755	1.881	2.635	1.941	0.802	1.384
GSM3384832	0.046	-0.766	-0.96	-2.199	-0.677	-1.889	0.409	0.936	-1.174	-1.425	-0.572	0.11	-1.247	-0.825	-0.91	-1.758	-0.78	-0.863	-0.262	-0.59	-1.142	0.72	-0.458	-1.798	-1.257	-2.285	-0.641	-0.866	-0.935	0.392	-1.046	-0.839	-0.619	0.7	-1.103	-1.373	-1.31	-0.645	0.751	-1.583	-0.745	-0.084	-1.635	0.802	-1.391	-0.311	-1.067	0.432	-1.08
GSM3384833	1.423	0.438	1.637	0.554	1.033	0.984	2.075	0.818	1.061	1.103	-0.823	0.715	1.066	0.979	1.326	1.071	1.705	0.832	0.875	0.983	0.656	1.746	1.806	0.484	1.369	-0.863	2.172	-0.561	-0.873	0.168	-0.279	-1.099	0.746	1.233	1.831	0.515	0.468	0.821	0.738	1.72	0.216	1.688	-0.253	1.008	1.015	1.345	0.007	0.315	1.699
GSM3384834	0.451	0.525	-0.325	-0.243	-0.479	-0.756	0.696	2.12	0.295	0.001	-0.34	0.524	-0.454	-0.395	0.084	0.492	0.32	0.638	0.255	-0.268	0.634	-0.376	1.955	0.402	-1.015	0.884	-0.759	0.895	0.997	0.344	0.443	-0.954	0.455	-0.793	-0.544	0.193	0.425	-0.078	1.035	-0.076	-0.486	-0.042	-0.125	-0.437	0.556	0.802	-0.122	1.535	0.612
GSM3384835	-1.18	-1.053	-1.053	-0.434	-0.731	-0.806	-0.179	-0.983	-0.415	-0.404	-0.381	-0.438	-1.091	-0.843	-1.142	-0.933	-0.964	-0.729	-0.41	-0.616	-1.025	-1.214	-0.655	-0.655	-0.242	-0.14	-0.777	-0.531	-0.781	0.055	-0.466	-0.335	-0.909	-0.982	-0.117	0.236	-0.037	-0.589	-0.493	-0.121	0.474	1.225	0.824	-0.532	0.196	-0.072	-0.61	-0.065	-0.584
GSM3384836	-0.658	-0.917	-1.145	-1.162	-0.618	-1.301	-1.23	-0.474	-0.79	-0.556	0.01	-0.763	-0.911	-0.681	-0.593	-0.391	-0.964	-0.704	-0.055	-0.575	-0.969	-0.619	-0.711	-1.187	-0.958	-1.867	-0.675	-0.666	-1.07	-0.567	-0.752	-0.566	-1.125	-0.89	-0.398	-0.003	-0.426	-1.97	0.436	-1.012	-0.316	-1.151	-0.751	-0.607	0.09	-0.987	0.119	-1.14	-1.007
GSM3384837	1.29	0.986	2.217	-0.385	0.376	1.297	0.593	-0.489	1.031	0.578	-0.595	-1.061	1.996	1.333	-0.534	1.14	-0.63	1.555	0.57	1.186	0.924	0.897	2.378	1.288	0.998	0.864	1.209	-0.889	1.524	0.949	-0.015	1.469	0.622	1.221	0.938	1.578	0.347	2.072	0.617	0.599	0.751	0.809	-0.59	1.091	0.713	-0.305	-0.26	0.121	0.567
GSM3384838	2.57	0.902	1.563	1.627	2.965	2.009	1.29	1.481	1.035	2.39	1.887	1.527	2.564	2.511	-0.63	2.083	1.749	2.233	1.191	3.061	2.262	1.306	0.193	1.478	1.713	1.019	2.635	1.372	1.208	1.011	1.121	0.547	1.884	2.119	2.285	1.13	1.16	1.072	1.872	2.52	1.98	1.771	2.122	2.066	2.076	3.069	2.447	1.933	1.705
GSM3384839	-0.356	-1.052	-1.229	-0.852	0.142	-0.862	-0.887	-0.723	-1.141	-0.025	-1.097	-0.25	0.53	-0.574	-0.265	-1.047	0.272	-0.887	-1.247	-0.645	-1.029	-1.086	-0.827	-2.777	-1.123	-1.313	-0.724	-0.904	0.021	-2.771	-0.119	-0.853	-1.494	0.224	-1.394	-1.903	-1.958	-1.061	-0.874	-0.641	-1.71	-0.373	-1.298	-0.895	-1.336	-1.461	0.417	-1.311	-0.111
GSM3384840	-0.847	-1.643	-1.147	-1.025	-0.754	-0.883	-1.176	-0.727	-1.157	-1.081	-0.976	-1.076	-0.861	-0.481	-0.729	0.054	-0.899	-0.935	-1.553	-0.602	-1.185	-1.626	-0.756	-0.015	-0.403	-0.53	-0.732	-0.92	-1.069	-0.535	-1.237	-1.241	-0.828	-1.29	-0.189	-0.907	-2.052	-0.427	-0.895	-0.376	-1.247	-0.647	-1.362	-0.449	-0.02	-0.979	-0.379	-0.85	-1.546
GSM3384842	-1.034	-1.382	-0.618	0.005	-0.79	-1.109	-0.843	-0.893	-1.162	-0.548	-0.984	-1.087	-0.961	-0.509	-1.049	-0.138	-0.79	-0.475	-1.5	-0.555	-0.843	-0.371	-0.837	-0.369	0.487	-1.046	-0.846	-0.926	0.238	-0.208	-0.369	-1.257	0.725	-1.117	0.017	-0.102	0.065	-0.971	-0.368	-0.333	-0.121	-0.707	-0.443	-1.407	-1.051	-0.751	-1.435	0.398	-1.263
GSM3384843	-0.312	-0.737	-0.745	-0.301	-0.611	-0.061	-1.234	-0.023	-0.216	-0.149	-0.903	-0.893	-1.244	-0.748	-0.018	-0.507	-0.94	-0.913	-0.518	-0.614	-0.602	-0.267	-0.826	-0.194	-1.147	-0.469	-0.487	-0.246	-1.047	-0.006	-1.084	-0.936	-0.728	-0.141	-0.405	-0.201	0.159	0.291	-0.049	-0.735	0.229	-0.263	-0.928	-0.798	-1.113	-0.205	-0.27	-1.658	0.061
GSM3384844	-0.683	-1.485	-1.215	-1.423	-1.363	-1.231	-1.188	-0.99	-1.152	-1.446	-1.051	-1.079	-1.11	-0.637	-1.053	-1.438	-0.887	-0.899	-2.013	-0.608	-1.224	-0.648	-0.8	-1.777	-1.119	-0.954	-0.822	-0.89	-0.955	-0.675	-1.105	-0.489	-1.321	0.062	-0.656	-1.853	-2.159	-1.32	-1.757	-0.306	-0.934	-0.499	-1.435	-0.085	-1.302	-1.365	-1.096	-0.758	-1.266
GSM3384845	-0.403	-0.487	-0.516	-0.528	-0.639	-0.654	-0.866	-0.967	-0.462	-0.866	-0.49	-0.559	-0.972	-0.461	-0.87	-0.49	-0.418	-0.826	-1.159	-0.459	-0.058	-1.11	-0.691	-0.219	1.046	-0.885	-0.232	-0.902	-1.07	-0.521	-0.104	-0.683	-0.24	-0.606	-0.908	-0.193	-0.45	-0.944	-0.552	-0.254	-0.317	-1.411	0.184	-1.244	-0.08	-0.887	-1.49	-0.803	-0.568
GSM3384846	-1.165	-0.985	-0.508	-0.867	-0.946	-0.121	-0.761	-0.753	-1.154	-1.478	-0.953	-1.064	-0.707	-1.034	-1.018	-1.223	-0.259	-0.947	-1.478	-0.592	-1.219	-1.511	-0.789	-0.822	-1.173	-0.529	-0.807	-0.83	-1.011	-2.551	-0.901	-0.777	-0.533	-1.275	-0.901	-1.579	-1.153	0.793	-1.769	-0.447	-1.636	-1.269	-1.201	-1.058	-1.249	-1.019	-0.958	-0.676	-1.578
GSM4075051	0.894	0.961	1.176	0.493	1.714	1.494	1.329	0.809	0.785	1.543	1.91	1.648	2.234	1.676	1.079	1.211	1.734	0.123	0.83	1.443	1.856	3.052	0.832	1.911	1.188	1.295	0.063	0.24	0.323	1.03	1.363	1.069	1.085	1.955	2.639	1.01	1.287	1.959	0.957	1.43	1.767	-0.218	0.908	1.293	1.01	0.458	0.517	1.003	2.495
GSM4075052	-0.608	0.687	-0.394	-0.246	-0.869	-0.07	0.038	-0.739	-0.486	-0.451	-0.91	-0.564	-0.161	-0.49	-0.784	-0.416	-0.37	-0.828	-0.447	-0.515	0.825	-0.463	-0.854	0.538	-0.348	0.657	-0.552	0.074	-0.337	-0.511	-0.122	0.539	-0.385	-0.97	-0.257	-0.537	-0.889	0.204	-0.393	-0.975	0.262	0.062	0.253	0.369	-1.178	0.092	-0.173	-0.384	-1.421
GSM4075053	-1.148	-0.642	-0.586	-1.124	-0.668	-0.077	-0.527	-1.141	-0.465	-1.068	-1.038	-0.1	-1.144	-0.272	-0.942	-0.295	-0.525	-0.508	-0.804	-0.248	-0.209	-0.238	-0.842	-0.506	0.125	-0.434	-0.309	-0.625	-1.038	-0.198	-0.894	0.437	-1.003	-1.015	-0.336	-0.427	-0.264	-0.379	-0.3	-1.169	-0.544	0.053	-1.148	0.545	-0.885	-0.042	-0.398	-0.962	0.238
GSM4075055	-0.028	-0.217	-0.431	-1.187	-0.376	-0.898	0.09	0.887	-0.6	-0.302	-1.019	-0.308	0.172	-0.626	-0.354	0.148	-0.522	1.015	-0.788	-0.513	1.289	0.109	-0.276	0.193	-0.835	-0.48	-0.321	1.904	1.47	1.342	-1.373	0.705	0.504	-0.644	-0.371	-2.07	0.469	1.133	-1.074	0.176	-1.67	0.592	-0.722	-0.891	-1.086	1.173	-0.291	-1.066	-0.072
GSM4075056	-0.046	-0.535	0.536	-0.093	-0.011	0.494	-0.037	-0.444	-0.36	0.418	0.411	1.621	0.466	1.203	-0.42	0.235	0.754	-0.504	-0.594	-0.713	0.751	1.51	0.6	1.031	0.507	-0.252	1.261	-0.216	-0.524	0.22	-0.138	1.13	0.832	0.611	1.709	-0.56	1.144	1.586	-1.058	0.32	0.706	0.202	-0.338	1.156	-1.037	-0.079	0.184	-0.002	0.89
GSM4075058	1.664	0.529	1.551	-0.102	0.95	1.548	0.867	1.576	0.69	0.079	1.336	0.765	1.072	1.513	1.393	2.787	1.269	0.208	1.8	1.581	0.576	1.383	1.745	1.827	0.137	1.915	2.035	2.072	1.703	1.311	1.049	2.034	0.94	0.694	0.868	1.156	1.486	1.57	1.401	0.792	0.914	0.972	1.61	1.11	1.327	2.013	-0.319	0.225	1.084
GSM4075059	-0.597	-0.608	-0.571	-1.057	-0.582	-0.395	-0.331	-1.118	0.483	0.196	0.086	-0.501	-0.716	-0.885	-0.51	-0.177	-0.575	-0.536	-0.457	-0.629	0.805	-0.288	-0.899	0.061	-0.422	0.476	-0.514	-0.419	-0.914	0.117	-0.556	0.057	-1.025	-1.08	0.059	0.515	0.16	-0.137	-0.762	-0.465	1.31	0.002	-0.571	0.6	0.319	0.046	-0.081	-1.461	0.461
GSM4075060	-0.054	1.268	0.058	-0.41	1.512	0.621	0.475	0.526	0.831	0.398	0.775	0.758	1.215	1.572	1.04	0.207	0.541	0.12	0.136	0.476	1.009	-0.09	1.203	0.389	1.539	0.448	0.331	0.457	-0.519	0.658	0.125	1.219	0.399	-0.197	0.645	0.267	0.635	0.506	1.192	-0.496	-0.018	1.233	0.36	1.842	0.94	1.312	-0.176	-0.755	-0.17
GSM4075063	-1.097	-0.254	-0.297	0.725	0.37	-0.153	-1.19	0.238	-0.104	-0.025	0.594	-0.735	-0.79	0.155	0.805	-0.937	-1.047	-0.665	0.391	0.201	-0.683	-0.665	0.837	-0.586	-0.509	-0.337	-0.607	-0.771	0.74	-1.552	1.037	-0.678	0.187	-0.31	-0.395	0.683	-0.131	-0.228	-1.024	-0.311	0.756	0.433	0.754	-0.492	-0.208	-0.694	-0.025	0.952	0.542
GSM4075064	-0.511	-1.572	0.361	-0.688	-1.074	-0.907	-0.078	0.181	-1.181	-0.988	0.065	-1.179	-0.634	-0.646	-0.918	-0.851	-1.032	-1.014	-0.59	-0.941	-0.2	-0.759	-0.654	-1.787	-0.982	-0.333	-0.902	-0.699	0.014	-0.231	-0.896	-1.306	1.547	-0.11	-0.556	-0.363	-0.782	-0.337	0.011	-0.94	-0.601	-0.199	-0.648	-1.657	-1.101	-0.658	-0.303	0.075	-0.526
GSM4075065	-0.044	-1.237	-0.711	-0.427	0.171	-1.058	-1.319	-0.462	-1.216	-1.346	-1.257	-1.07	-0.895	-1.087	-0.742	-0.264	-0.892	-0.873	-1.168	-0.939	-0.879	-0.871	-1.055	-0.491	-1.178	-1.969	-0.867	-0.963	-0.516	-1.32	-0.357	-0.858	-1.394	-0.661	-0.618	-0.747	-0.705	-0.866	-0.66	-0.504	-1.277	-0.701	-0.746	-0.95	-0.837	-0.89	-0.719	-1	-0.128
GSM4075066	-1.562	-1.528	-1.151	-0.69	-0.527	-1.225	-1.403	-1.353	-1.214	-1.439	-1.22	-1.302	-1.153	-1.179	-0.992	-1.198	-0.795	-0.376	-1.391	-1.073	-1.709	-0.901	-1.176	-1.876	-0.967	-1.413	-0.879	-1.053	-1.123	-1.865	-0.65	-0.773	-1.157	-1.469	-1.148	-2.339	-2.257	-1.804	-1.759	-1.013	-1.693	-0.317	-1.254	-1.952	-1.615	-1.585	-1.165	-0.479	-1.212
GSM4075067	1.168	1.637	1.804	1.596	1.491	0.729	2.086	1.844	1.125	1.257	1.246	0.337	1.246	0.967	0.561	0.778	1.307	0.468	0.811	-0.609	-0.694	0.441	1.385	0.785	1.957	1.042	1.864	2.631	1.859	1.138	0.992	-0.764	-0.427	0.972	0.52	0.836	0.915	-0.074	0.484	1.023	0.759	-0.276	1.033	0.266	1.155	-0.237	1.969	0.57	0.444
GSM4075068	1.178	1.202	0.226	1.535	1.246	1.916	0.585	1.206	1.457	1.56	1.452	1.615	0.859	1.249	1.979	1.464	1.278	2.261	1.853	2.379	-0.431	0.093	1.697	0.647	2.087	1.239	0.505	-0.35	1.597	0.131	1.162	0.471	0.809	0.091	0.034	0.769	0.153	-0.367	1.669	1.297	0.859	2.839	1.584	0.255	1.158	2.1	2.28	2.462	-2.203
GSM4075069	1.541	1.154	1.615	1.892	0.58	0.174	1.273	0.972	2.09	1.393	0.869	0.191	1.088	0.315	2.004	0.842	2.236	0.469	0.737	0.433	-0.023	0.73	0.471	0.475	0.013	1.25	-0.052	-0.815	0.638	0.539	1.907	1.308	1.6	1.678	0.021	1.402	0.694	0.652	0.571	2.09	0.414	1.257	1.822	0.44	1.127	0.299	2.208	2.273	1.25
GSM4075070	-0.95	-0.925	-1.314	-0.42	-0.353	-0.127	-1.161	-0.874	-1.14	-0.231	-0.674	-1.068	-0.792	-0.858	-0.895	-0.891	-0.94	-1.024	-0.648	-1.238	-1.359	-0.735	-1.094	-0.929	-1.006	0.45	-0.823	-0.206	-0.837	-1.14	-0.505	-1.025	-0.162	0.942	-0.95	-0.279	-1.202	-1.23	-0.934	-1.078	0.015	-1.321	-0.679	-0.653	0.55	-1.303	-0.965	-0.663	-0.743
GSM4075071	-0.391	-0.114	-1.291	0.196	-1.134	-0.794	-1.388	-0.493	-1.043	-0.164	-0.459	-0.711	-0.788	-0.867	0.251	0.965	-0.783	-1.32	-0.268	0.354	0.114	-0.2	-0.754	-0.251	-0.526	-0.327	-0.942	0.403	-1.025	-0.902	-1.01	-0.913	-1.064	-1.042	-0.897	0.921	-0.26	-0.931	-0.086	-0.307	0.571	-1.559	-0.81	-0.821	-0.398	-0.991	-0.58	-0.371	0.199
GSM4075072	0.854	-0.124	1.498	2.146	1.348	0.884	-0.222	0.89	0.656	0.712	0.13	0.475	0.913	0.529	0.413	-0.534	0.214	2.349	0.23	1.331	-0.739	-0.992	0.95	0.462	-0.739	-0.5	2.116	-0.079	0.936	-0.009	1.32	-1.204	0.783	0.303	-0.59	0.785	-0.318	-0.522	0.568	0.521	-0.216	-0.126	0.763	0.468	0.842	-0.463	-0.423	-0.059	0.482
GSM4075074	-1.891	-1.547	-1.285	-1.093	-1.536	-1.079	-1.208	-0.914	-1.267	-1.557	-1.2	-1.236	-1.48	-1.154	-1.114	-1.275	-0.737	-0.559	-1.198	-1.193	-1.216	-1.274	-1.182	-1.143	-1.312	-1.233	-1.058	-0.889	-1.016	-1.369	-1.25	-1.054	-1.007	0.074	-1.013	-0.671	-1.11	-1.271	-0.669	-1.331	-1.503	-1.27	-1.291	-1.218	-1.436	-0.89	-0.913	-0.525	-0.905
SRS926534	2.334	1.644	1.394	1.05	1.558	1.275	0.139	3.249	-0.113	1.166	0.563	0.424	1.329	2.466	0.564	1.787	-0.129	2.409	1.646	2.317	1.184	1.462	2.909	1.775	0.907	0.601	1.687	0.065	-0.293	0.479	0.789	-0.304	0.556	0.762	-0.152	0.623	0.988	1.289	1.281	2.626	-0.371	0.714	1.507	1.062	2.164	-0.069	1.165	-0.52	0.893
SRS926535	-0.522	0.124	-0.14	0.579	-0.581	0.173	1.136	0.519	3.412	0.445	2.275	2.19	0.139	-0.306	1.133	0.583	2.455	0.35	0.558	2.246	0.687	-0.916	-0.378	0.9	0.911	1.06	2.061	0.81	2.119	0.778	0.75	3.281	1.526	0.356	1.341	1.103	1.025	-0.045	-1.054	-0.159	2.182	0.142	1.006	-0.751	1.192	1.043	0.538	-0.082	-0.182
SRS926536	-1.451	-0.348	-0.206	0.209	-0.83	-0.392	1.298	0.046	-0.423	0.566	-0.569	0.768	-0.768	-0.951	-1.278	-0.184	-0.126	-0.4	0.186	-0.513	-0.9	0.726	-0.63	-0.41	0.613	0.292	0.887	-0.556	-0.582	0.46	0.584	-0.125	-0.785	-0.729	0.362	0.813	0.736	-0.396	0.791	-0.858	-0.223	-1.09	0.055	0.145	-0.873	0.637	-0.823	-0.604	0.663
SRS926537	-0.649	-1.384	-0.738	-0.745	-0.563	-1.421	-0.724	-0.16	-0.419	-1.29	-0.266	-0.898	-0.732	0.321	-1.106	-0.703	-0.438	-0.731	-0.964	-0.527	-0.879	-0.704	-0.536	-0.599	-1.286	-1.378	-0.601	-0.51	-0.785	-0.2	0.084	-0.736	-0.372	-0.861	0.416	-1.835	-0.946	-2.056	-0.931	-0.303	-0.768	-0.641	-1.282	-1.055	-0.975	0.281	-0.734	-1.259	-1.821
SRS926538	-0.888	-1.236	-0.776	-0.598	-1.043	-1.402	0.307	-0.754	-0.417	0.199	-0.948	0.43	-0.787	-0.035	-0.709	-0.006	-0.454	-0.337	-0.802	-0.463	-0.771	1.272	-0.63	-1.021	0.411	-1.577	-0.619	-0.515	-0.506	0.192	-2.279	-0.674	0.114	-0.903	-1.204	0.322	0.291	-1.265	-0.064	0.366	-1.054	-1.118	-1.034	-0.489	-1.003	-1.391	-1.047	0.553	-0.892
SRS926539	-0.127	-0.23	0.493	1.542	0.485	1.043	0.888	-0.36	0.151	-1.03	0.268	1.229	0.948	0.323	1.071	0.185	2.231	0.305	0.841	-0.579	1.398	1.434	-0.361	0.496	1.255	0.566	-0.792	0.6	0.307	0.282	0.594	0.284	2.238	-0.861	2.279	0.627	0.999	1.307	2.052	-0.115	0.012	1.93	1.218	2.29	0.507	-0.088	0.617	1.394	0.389
SRS926540	-0.281	-0.294	-0.717	-0.655	-1.385	-0.864	-0.999	-0.689	-0.397	-1.038	-0.783	-0.88	-0.098	1.219	-0.694	-1.18	-0.447	1.382	-0.982	-0.517	-0.598	-1.902	-0.017	-1.313	-1.164	-0.745	-0.676	-0.566	-0.657	-1.41	-0.896	-0.728	-0.724	0.399	-0.968	-0.995	-1.313	-0.678	-0.685	0.805	-0.185	-0.714	-1.174	0.381	-0.683	-1.331	-1.161	0.541	-0.523
SRS926541	-0.723	-0.305	0.285	-0.945	-0.463	0.263	-0.793	-0.164	-0.223	-0.042	-0.663	-0.524	-0.945	0.161	-0.933	-0.347	-0.442	-0.485	-0.602	-0.569	-0.875	0.236	-0.363	0.584	-0.946	0.993	-0.467	0.011	-0.376	0.237	0.014	-0.42	-0.354	0.271	0.194	0.773	-0.648	0.339	0.215	-1.258	-1.005	0.462	0.309	-0.849	0.165	-0.1	0.112	0.694	-1.183
SRS926542	-0.611	0.105	-0.776	-0.416	-0.84	0.587	-0.705	-0.749	-0.363	-1.565	-0.316	-0.861	-1.455	0	-0.379	-0.356	-0.454	-0.701	0.374	0.196	-0.777	-0.737	-0.63	-0.43	-1.363	0.878	-0.247	-0.561	-0.75	-0.271	0.885	-0.381	1.12	2.353	0.093	-0.584	0.361	-0.273	0.332	-0.359	-0.53	-1.009	-0.841	-0.083	0.446	-0.399	-0.684	-1.49	-0.306
SRS926544	1.464	2.165	-0.022	1.099	1.581	1.296	-1.333	-0.428	-0.328	1.923	1.657	-0.53	1.226	-0.852	1.397	0.953	-0.454	-0.75	1.022	-0.508	1.171	-0.045	-0.219	1.345	0.793	-0.057	-0.65	-0.492	1.601	1.477	-0.313	0.254	-0.876	-0.823	0.693	0.697	0.743	0.923	0.186	-1.333	1.355	1.353	-0.167	0.335	0.569	2.345	0.534	1.077	1.577
SRS926545	0.631	0.235	-0.363	0.378	0.654	1.345	0.63	-0.288	-0.215	1.033	0.661	1	-0.078	0.324	0.599	-0.153	-0.454	1.163	-0.025	-0.423	1.016	0.571	-0.63	0.58	-0.259	1.195	-0.365	-0.357	-0.423	0.586	1.178	0.111	-0.08	1.233	-0.467	0.773	0.928	0.424	-1.085	-0.365	1.175	0.936	1.625	0.281	0.942	0.405	-0.148	-0.065	1.503
SRS926546	-0.074	-0.927	-0.78	-1.341	-0.166	-1.051	-1.093	-0.248	-0.415	-0.029	-0.933	-0.782	-0.881	-1.702	0.158	-1.54	-0.436	-0.744	-1.262	-0.486	-0.895	-0.523	0.792	0.027	-1.308	-1.52	-0.776	-0.564	1.575	-2.329	-1.517	-0.293	-0.962	-0.869	-0.918	-1.501	-1.715	-0.129	-1.076	0.83	-1.25	0.501	-0.612	0.629	-0.882	-1.208	-1.101	1.566	0.394
SRS926547	0.337	-0.396	-0.396	-1.415	0.147	-0.423	-0.454	-0.163	-0.343	-0.129	-0.968	-0.887	0.324	-0.512	-1.146	-0.842	-0.397	-0.746	-1.329	-0.387	-0.889	-0.692	-0.473	-0.273	0.597	0.404	-0.642	-0.466	-0.554	-1.06	-0.455	-0.131	-0.731	-0.751	-0.439	-1.205	-1.347	-0.665	-0.861	0.325	0.217	-0.981	-0.536	-1.794	-0.857	0.39	0.479	-0.527	-0.835
[truncated: 54 more columns]

## Sheet: Figure_1D
# Source Data Figure_1D
Sample	FOSL1	Wang_2017	Richards_2021	Dataset
GSM1194851	0.220174	MES	INJ	GSE49161
GSM1194852	-1.07623	CL	DEV	GSE49161
GSM1194853	-0.448792	MES	INJ	GSE49161
GSM1194854	0.36462	MES	INJ	GSE49161
GSM1194855	-0.924562	CL	DEV	GSE49161
GSM1194856	0.0612834	PN	DEV	GSE49161
GSM1194857	1.07963	CL	DEV	GSE49161
GSM1194858	-0.586016	CL	DEV	GSE49161
GSM1194859	-0.111149	PN	DEV	GSE49161
GSM1194860	0.73657	CL	DEV	GSE49161
GSM1194862	3.05945	MES	INJ	GSE49161
GSM1194863	-0.350388	CL	DEV	GSE49161
GSM1194865	-0.832478	PN	DEV	GSE49161
GSM1194866	-0.648309	PN	DEV	GSE49161
GSM1194867	-0.0768433	PN	DEV	GSE49161
GSM1638621	1.23687	MES	INJ	GSE67089
GSM1638622	1.27568	MES	INJ	GSE67089
GSM1638623	1.23299	MES	INJ	GSE67089
GSM1638624	-0.695736	CL	DEV	GSE67089
GSM1638625	-0.577859	CL	DEV	GSE67089
GSM1638626	-0.741335	CL	DEV	GSE67089
GSM1638630	-0.87231	PN	DEV	GSE67089
GSM1638633	-0.873765	CL	DEV	GSE67089
GSM1638634	-0.814584	CL	DEV	GSE67089
GSM1638635	-0.992128	CL	DEV	GSE67089
GSM1638636	1.23639	MES	INJ	GSE67089
GSM1638637	1.17575	MES	INJ	GSE67089
GSM1638638	1.43043	MES	INJ	GSE67089
GSM1638639	-0.721446	CL	DEV	GSE67089
GSM1638640	-0.634615	CL	DEV	GSE67089
GSM1638641	-0.761224	CL	DEV	GSE67089
GSM1638642	-0.920334	CL	DEV	GSE67089
GSM1638643	-0.84466	CL	DEV	GSE67089
GSM1638644	-0.7132	CL	DEV	GSE67089
GSM1638645	-0.784023	CL	DEV	GSE67089
GSM1638646	-0.796636	CL	DEV	GSE67089
GSM1638647	-0.782568	CL	DEV	GSE67089
GSM1638658	1.27374	MES	INJ	GSE67089
GSM1638659	1.28829	MES	INJ	GSE67089
GSM1638660	1.53472	MES	INJ	GSE67089
GSM1638661	0.858986	MES	INJ	GSE67089
GSM1638662	0.952609	MES	INJ	GSE67089
GSM1638663	0.770699	MES	INJ	GSE67089
GSM198765	0.114994	MES	INJ	GSE8049
GSM198767	-1.78777	CL	DEV	GSE8049
GSM198768	0.836368	MES	INJ	GSE8049
GSM198769	-0.452807	PN	DEV	GSE8049
GSM198770	0.0684991	MES	INJ	GSE8049
GSM198771	1.4253	MES	INJ	GSE8049
GSM198772	-0.56693	PN	DEV	GSE8049
GSM198773	-1.34255	PN	DEV	GSE8049
GSM198774	0.704633	MES	INJ	GSE8049
GSM198775	0.942038	MES	INJ	GSE8049
GSM198776	-0.865624	CL	DEV	GSE8049
GSM198777	1.01671	MES	INJ	GSE8049
GSM198778	0.72788	PN	DEV	GSE8049
GSM198779	1.14563	MES	INJ	GSE8049
GSM198780	-0.404198	PN	DEV	GSE8049
GSM198781	-1.59757	PN	DEV	GSE8049
GSM3384803	-1.38053	CL	DEV	GSE119834
GSM3384804	-1.38571	PN	DEV	GSE119834
GSM3384805	-0.748591	CL	DEV	GSE119834
GSM3384806	-0.120956	CL	DEV	GSE119834
GSM3384807	0.0959925	CL	DEV	GSE119834
GSM3384808	-0.824754	PN	DEV	GSE119834
GSM3384809	0.885261	PN	DEV	GSE119834
GSM3384810	1.30976	MES	INJ	GSE119834
GSM3384811	1.22663	MES	INJ	GSE119834
GSM3384812	1.54703	MES	INJ	GSE119834
GSM3384813	1.00151	MES	INJ	GSE119834
GSM3384814	-0.770536	CL	DEV	GSE119834
GSM3384815	1.18344	MES	INJ	GSE119834
GSM3384816	0.738968	MES	INJ	GSE119834
GSM3384817	1.54601	MES	INJ	GSE119834
GSM3384818	0.618623	MES	INJ	GSE119834
GSM3384820	0.664424	MES	INJ	GSE119834
GSM3384821	-0.399358	CL	DEV	GSE119834
GSM3384822	-1.10009	CL	DEV	GSE119834
GSM3384823	0.123725	CL	DEV	GSE119834
GSM3384824	0.177874	CL	DEV	GSE119834
GSM3384825	-1.3618	PN	DEV	GSE119834
GSM3384826	-0.170206	MES	INJ	GSE119834
GSM3384827	-0.165715	MES	INJ	GSE119834
GSM3384828	-0.551081	PN	DEV	GSE119834
GSM3384829	1.28675	MES	INJ	GSE119834
GSM3384830	0.266613	CL	DEV	GSE119834
GSM3384831	0.996502	MES	INJ	GSE119834
GSM3384832	-1.88916	PN	DEV	GSE119834
GSM3384833	0.983935	MES	INJ	GSE119834
GSM3384834	-0.755843	MES	INJ	GSE119834
GSM3384835	-0.806093	CL	DEV	GSE119834
GSM3384836	-1.30141	PN	DEV	GSE119834
GSM3384837	1.29651	MES	INJ	GSE119834
GSM3384838	2.0093	MES	INJ	GSE119834
GSM3384839	-0.862061	PN	DEV	GSE119834
GSM3384840	-0.883472	CL	DEV	GSE119834
GSM3384842	-1.10929	CL	DEV	GSE119834
GSM3384843	-0.0610251	CL	DEV	GSE119834
GSM3384844	-1.23083	CL	DEV	GSE119834
GSM3384845	-0.65426	CL	DEV	GSE119834
GSM3384846	-0.120674	CL	DEV	GSE119834
GSM4075051	1.4939	MES	INJ	Freiburg
GSM4075052	-0.0699662	CL	DEV	Freiburg
GSM4075053	-0.0770214	CL	DEV	Freiburg
GSM4075055	-0.897635	PN	DEV	Freiburg
GSM4075056	0.49384	MES	INJ	Freiburg
GSM4075058	1.54794	MES	INJ	Freiburg
GSM4075059	-0.39522	CL	DEV	Freiburg
GSM4075060	0.621373	MES	INJ	Freiburg
GSM4075063	-0.153265	CL	DEV	Freiburg
GSM4075064	-0.906981	PN	DEV	Freiburg
GSM4075065	-1.05824	PN	DEV	Freiburg
GSM4075066	-1.22534	PN	DEV	Freiburg
GSM4075067	0.729033	MES	INJ	Freiburg
GSM4075068	1.91635	MES	INJ	Freiburg
GSM4075069	0.17392	MES	INJ	Freiburg
GSM4075070	-0.126738	CL	DEV	Freiburg
GSM4075071	-0.794065	CL	DEV	Freiburg
GSM4075072	0.883743	MES	INJ	Freiburg
GSM4075074	-1.07937	CL	DEV	Freiburg
SRS926534	1.27502	MES	INJ	SRP057855
SRS926535	0.173399	MES	INJ	SRP057855
SRS926536	-0.391813	CL	DEV	SRP057855
SRS926537	-1.42143	PN	DEV	SRP057855
SRS926538	-1.402	CL	DEV	SRP057855
SRS926539	1.0431	MES	INJ	SRP057855
SRS926540	-0.863552	CL	DEV	SRP057855
SRS926541	0.263404	PN	DEV	SRP057855
SRS926542	0.587458	PN	DEV	SRP057855
SRS926544	1.29556	MES	INJ	SRP057855
SRS926545	1.34504	MES	INJ	SRP057855
SRS926546	-1.05116	CL	DEV	SRP057855
SRS926547	-0.422661	CL	DEV	SRP057855

## Sheet: Figure_1E
# Source Data Figure_1E
Sample	FOSL1	IDH_codel_subtype	Dataset
TCGA-02-0047	0.4933	IDHwt	TCGA
TCGA-02-0055	3.01967	IDHwt	TCGA
TCGA-02-2483	0.52624	IDHmut-non-codel	TCGA
TCGA-02-2485	0.897081	IDHwt	TCGA
TCGA-02-2486	1.90037	IDHwt	TCGA
TCGA-06-0125	0.867688	IDHwt	TCGA
TCGA-06-0129	-0.0906667	IDHmut-non-codel	TCGA
TCGA-06-0130	2.34439	IDHwt	TCGA
TCGA-06-0132	0.668055	IDHwt	TCGA
TCGA-06-0138	0.788432	IDHwt	TCGA
TCGA-06-0141	1.61784	IDHwt	TCGA
TCGA-06-0157	-0.141672	IDHwt	TCGA
TCGA-06-0158	0.851618	IDHwt	TCGA
TCGA-06-0168	0.0979575	IDHwt	TCGA
TCGA-06-0174	0.615629	IDHwt	TCGA
TCGA-06-0178	0.0875864	IDHmut-non-codel	TCGA
TCGA-06-0184	0.956862	IDHwt	TCGA
TCGA-06-0187	1.82863	IDHwt	TCGA
TCGA-06-0190	1.64432	IDHwt	TCGA
TCGA-06-0210	2.34766	IDHwt	TCGA
TCGA-06-0211	0.48567	IDHwt	TCGA
TCGA-06-0219	0.677288	IDHwt	TCGA
TCGA-06-0238	0.0465524	IDHwt	TCGA
TCGA-06-0644	2.79228	IDHwt	TCGA
TCGA-06-0645	1.30852	IDHwt	TCGA
TCGA-06-0646	0.987742	IDHwt	TCGA
TCGA-06-0649	0.637936	IDHwt	TCGA
TCGA-06-0686	1.09474	IDHwt	TCGA
TCGA-06-0743	0.62344	IDHwt	TCGA
TCGA-06-0744	0.651771	IDHwt	TCGA
TCGA-06-0745	1.19187	IDHwt	TCGA
TCGA-06-0747	1.80203	IDHwt	TCGA
TCGA-06-0749	0.271815	IDHwt	TCGA
TCGA-06-0750	1.60299	IDHwt	TCGA
TCGA-06-0878	1.50338	IDHwt	TCGA
TCGA-06-0882	1.86774	IDHwt	TCGA
TCGA-06-1804	-0.359809	IDHwt	TCGA
TCGA-06-2557	-0.0849173	IDHwt	TCGA
TCGA-06-2558	0.489687	IDHwt	TCGA
TCGA-06-2559	1.17673	IDHwt	TCGA
TCGA-06-2561	1.24482	IDHwt	TCGA
TCGA-06-2562	1.96275	IDHwt	TCGA
TCGA-06-2563	0.748248	IDHwt	TCGA
TCGA-06-2564	0.935445	IDHwt	TCGA
TCGA-06-2565	0.618713	IDHwt	TCGA
TCGA-06-2567	0.813638	IDHwt	TCGA
TCGA-06-2569	-0.252025	IDHwt	TCGA
TCGA-06-2570	0.955475	IDHmut-non-codel	TCGA
TCGA-06-5408	1.54298	IDHwt	TCGA
TCGA-06-5410	1.71958	IDHwt	TCGA
TCGA-06-5411	0.779441	IDHwt	TCGA
TCGA-06-5412	1.82419	IDHwt	TCGA
TCGA-06-5413	0.635724	IDHwt	TCGA
TCGA-06-5414	1.39631	IDHwt	TCGA
TCGA-06-5415	1.05971	IDHwt	TCGA
TCGA-06-5418	1.42653	IDHwt	TCGA
TCGA-06-5856	0.30097	IDHwt	TCGA
TCGA-06-5858	1.13001	IDHwt	TCGA
TCGA-06-5859	-0.29342	IDHwt	TCGA
TCGA-08-0386	1.2763	IDHwt	TCGA
TCGA-12-0616	0.474964	IDHwt	TCGA
TCGA-12-0618	0.692969	IDHwt	TCGA
TCGA-12-0619	1.54031	IDHwt	TCGA
TCGA-12-0821	0.484909	IDHwt	TCGA
TCGA-12-3650	-0.0148433	IDHwt	TCGA
TCGA-12-3652	1.45293	IDHwt	TCGA
TCGA-12-3653	0.189924	IDHwt	TCGA
TCGA-12-5295	0.478764	IDHwt	TCGA
TCGA-12-5299	2.30052	IDHwt	TCGA
TCGA-14-0781	2.13803	IDHwt	TCGA
TCGA-14-0787	1.84034	IDHwt	TCGA
TCGA-14-0789	1.92643	IDHwt	TCGA
TCGA-14-0790	0.109072	IDHwt	TCGA
TCGA-14-0817	0.318142	IDHwt	TCGA
TCGA-14-1034	1.04677	IDHwt	TCGA
TCGA-14-1823	0.652621	IDHwt	TCGA
TCGA-14-1825	0.204866	IDHwt	TCGA
TCGA-14-1829	0.428032	IDHwt	TCGA
TCGA-14-2554	1.16079	IDHwt	TCGA
TCGA-15-0742	1.26265	IDHwt	TCGA
TCGA-15-1444	0.031775	IDHmut-non-codel	TCGA
TCGA-16-0846	0.571035	IDHwt	TCGA
TCGA-16-1045	0.229938	IDHwt	TCGA
TCGA-19-1390	0.0685608	IDHwt	TCGA
TCGA-19-2619	1.46783	IDHwt	TCGA
TCGA-19-2620	1.5979	IDHwt	TCGA
TCGA-19-2624	1.29973	IDHwt	TCGA
TCGA-19-2625	1.65422	IDHwt	TCGA
TCGA-19-2629	0.0606841	IDHmut-non-codel	TCGA
TCGA-19-5960	-0.301818	IDHwt	TCGA
TCGA-26-1442	-0.282606	IDHmut-non-codel	TCGA
TCGA-26-5132	1.39431	IDHwt	TCGA
TCGA-26-5133	0.22084	IDHwt	TCGA
TCGA-26-5134	0.353308	IDHwt	TCGA
TCGA-26-5135	1.63849	IDHwt	TCGA
TCGA-26-5136	1.52939	IDHwt	TCGA
TCGA-26-5139	2.1322	IDHwt	TCGA
TCGA-27-1830	0.873378	IDHwt	TCGA
TCGA-27-1831	1.22848	IDHwt	TCGA
TCGA-27-1832	1.74807	IDHwt	TCGA
TCGA-27-1834	0.67518	IDHwt	TCGA
TCGA-27-1835	0.514754	IDHwt	TCGA
TCGA-27-1837	0.9619	IDHwt	TCGA
TCGA-27-2519	1.6861	IDHwt	TCGA
TCGA-27-2521	0.671752	IDHmut-non-codel	TCGA
TCGA-27-2523	1.18485	IDHwt	TCGA
TCGA-27-2524	2.6146	IDHwt	TCGA
TCGA-27-2526	1.47689	IDHwt	TCGA
TCGA-27-2528	1.32516	IDHwt	TCGA
TCGA-28-1747	0.476423	IDHwt	TCGA
TCGA-28-1753	0.768595	IDHwt	TCGA
TCGA-28-2509	1.779	IDHwt	TCGA
TCGA-28-2510	0.628711	IDHwt	TCGA
TCGA-28-2513	1.28045	IDHwt	TCGA
TCGA-28-2514	1.21374	IDHwt	TCGA
TCGA-28-5204	0.879812	IDHwt	TCGA
TCGA-28-5207	-0.666872	IDHwt	TCGA
TCGA-28-5208	1.0772	IDHwt	TCGA
TCGA-28-5209	0.690719	IDHwt	TCGA
TCGA-28-5213	1.17216	IDHwt	TCGA
TCGA-28-5215	0.536793	IDHwt	TCGA
TCGA-28-5216	0.981865	IDHwt	TCGA
TCGA-28-5218	0.283202	IDHwt	TCGA
TCGA-28-5220	-0.820809	IDHwt	TCGA
TCGA-32-1970	0.714463	IDHwt	TCGA
TCGA-32-1980	1.35272	IDHwt	TCGA
TCGA-32-1982	0.481288	IDHwt	TCGA
TCGA-32-2615	2.37077	IDHwt	TCGA
TCGA-32-2632	0.90318	IDHwt	TCGA
TCGA-32-2634	0.324598	IDHwt	TCGA
TCGA-32-2638	1.3799	IDHwt	TCGA
TCGA-32-4213	1.12962	IDHwt	TCGA
TCGA-32-5222	1.03546	IDHwt	TCGA
TCGA-41-2571	1.07091	IDHwt	TCGA
TCGA-41-2572	0.726827	IDHwt	TCGA
TCGA-41-3915	1.22354	IDHwt	TCGA
TCGA-41-4097	1.84089	IDHwt	TCGA
TCGA-41-5651	0.0010947	IDHwt	TCGA
TCGA-76-4925	1.35887	IDHwt	TCGA
TCGA-76-4926	1.30012	IDHwt	TCGA
TCGA-76-4928	2.01916	IDHwt	TCGA
TCGA-76-4929	0.896738	IDHwt	TCGA
TCGA-76-4931	1.37037	IDHwt	TCGA
TCGA-CS-4938	-0.79126	IDHmut-non-codel	TCGA
TCGA-CS-4941	-0.152899	IDHwt	TCGA
TCGA-CS-4942	-1.24628	IDHmut-non-codel	TCGA
TCGA-CS-4943	-0.673843	IDHmut-non-codel	TCGA
TCGA-CS-4944	0.0256801	IDHmut-non-codel	TCGA
TCGA-CS-5390	-1.63142	IDHmut-codel	TCGA
TCGA-CS-5393	-1.10189	IDHmut-non-codel	TCGA
TCGA-CS-5394	-1.3997	IDHmut-non-codel	TCGA
TCGA-CS-5395	-1.20014	IDHwt	TCGA
TCGA-CS-5396	0.0376904	IDHmut-codel	TCGA
TCGA-CS-5397	0.878187	IDHwt	TCGA
TCGA-CS-6186	0.0627831	IDHwt	TCGA
TCGA-CS-6188	0.877937	IDHwt	TCGA
TCGA-CS-6290	-0.212222	IDHmut-non-codel	TCGA
TCGA-CS-6665	0.0452055	IDHmut-non-codel	TCGA
TCGA-CS-6666	-0.486831	IDHmut-non-codel	TCGA
TCGA-CS-6667	-0.790474	IDHmut-non-codel	TCGA
TCGA-CS-6668	-1.11188	IDHmut-codel	TCGA
TCGA-CS-6669	-2.1535	IDHwt	TCGA
TCGA-CS-6670	0.0926434	IDHmut-codel	TCGA
TCGA-DB-5270	-0.863222	IDHmut-non-codel	TCGA
TCGA-DB-5273	-0.452044	IDHmut-non-codel	TCGA
TCGA-DB-5274	-0.233007	IDHmut-codel	TCGA
TCGA-DB-5275	1.14867	IDHmut-non-codel	TCGA
TCGA-DB-5276	0.0448242	IDHmut-non-codel	TCGA
TCGA-DB-5277	-0.385372	IDHmut-non-codel	TCGA
TCGA-DB-5278	-1.6688	IDHmut-codel	TCGA
TCGA-DB-5279	-0.869276	IDHmut-codel	TCGA
TCGA-DB-5280	-0.694629	IDHmut-non-codel	TCGA
TCGA-DB-5281	0.696288	IDHmut-non-codel	TCGA
TCGA-DB-A4X9	-0.720457	IDHmut-non-codel	TCGA
TCGA-DB-A4XA	-0.596185	IDHmut-codel	TCGA
TCGA-DB-A4XB	-1.45902	IDHmut-non-codel	TCGA
TCGA-DB-A4XC	-0.41705	IDHmut-non-codel	TCGA
TCGA-DB-A4XD	-1.26338	IDHmut-non-codel	TCGA
TCGA-DB-A4XE	-0.467854	IDHmut-non-codel	TCGA
TCGA-DB-A4XF	0.0506263	IDHmut-non-codel	TCGA
TCGA-DB-A4XG	-0.431939	IDHmut-codel	TCGA
TCGA-DB-A4XH	-0.883667	IDHmut-codel	TCGA
TCGA-DB-A64L	0.812067	IDHmut-codel	TCGA
TCGA-DB-A64O	0.715637	IDHwt	TCGA
TCGA-DB-A64P	0.0611456	IDHmut-codel	TCGA
TCGA-DB-A64Q	-0.260375	IDHmut-codel	TCGA
TCGA-DB-A64R	-1.44719	IDHmut-codel	TCGA
TCGA-DB-A64S	-0.236835	IDHmut-non-codel	TCGA
TCGA-DB-A64U	-0.75695	IDHmut-codel	TCGA
TCGA-DB-A64V	-0.586744	IDHmut-codel	TCGA
TCGA-DB-A64W	-1.03556	IDHmut-codel	TCGA
TCGA-DB-A64X	-0.344254	IDHmut-non-codel	TCGA
TCGA-DB-A75K	1.28594	IDHmut-codel	TCGA
TCGA-DB-A75L	-0.104208	IDHmut-non-codel	TCGA
TCGA-DB-A75M	-1.03402	IDHmut-non-codel	TCGA
TCGA-DB-A75O	0.626463	IDHmut-non-codel	TCGA
TCGA-DB-A75P	0.882728	IDHwt	TCGA
TCGA-DH-5140	-0.326498	IDHwt	TCGA
TCGA-DH-5141	0.735844	IDHmut-codel	TCGA
TCGA-DH-5142	-0.0734924	IDHmut-non-codel	TCGA
TCGA-DH-5143	-0.689043	IDHmut-non-codel	TCGA
TCGA-DH-5144	-1.0995	IDHmut-codel	TCGA
TCGA-DH-A669	-0.424521	IDHmut-codel	TCGA
TCGA-DH-A66B	0.581293	IDHmut-non-codel	TCGA
TCGA-DH-A66D	0.153032	IDHmut-non-codel	TCGA
TCGA-DH-A66F	-0.850727	IDHmut-codel	TCGA
TCGA-DH-A66G	1.19207	IDHmut-non-codel	TCGA
TCGA-DH-A7UR	-0.888027	IDHmut-codel	TCGA
TCGA-DH-A7US	-1.27367	IDHmut-codel	TCGA
TCGA-DH-A7UT	0.53639	IDHmut-non-codel	TCGA
TCGA-DH-A7UU	-0.943156	IDHmut-non-codel	TCGA
TCGA-DH-A7UV	-0.696069	IDHmut-non-codel	TCGA
TCGA-DU-5847	0.870445	IDHwt	TCGA
TCGA-DU-5849	-0.897904	IDHmut-codel	TCGA
TCGA-DU-5851	-1.22459	IDHmut-non-codel	TCGA
TCGA-DU-5852	0.583879	IDHwt	TCGA
TCGA-DU-5853	-0.609477	IDHmut-non-codel	TCGA
TCGA-DU-5854	0.435819	IDHwt	TCGA
TCGA-DU-5855	0.561988	IDHmut-non-codel	TCGA
TCGA-DU-5870	-1.03533	IDHmut-codel	TCGA
TCGA-DU-5871	0.269896	IDHmut-non-codel	TCGA
TCGA-DU-5872	-0.0634658	IDHmut-non-codel	TCGA
TCGA-DU-5874	-0.240608	IDHmut-codel	TCGA
TCGA-DU-6392	0.834965	IDHwt	TCGA
TCGA-DU-6393	-0.500132	IDHmut-codel	TCGA
TCGA-DU-6394	0.910923	IDHmut-codel	TCGA
TCGA-DU-6395	0.573976	IDHmut-non-codel	TCGA
TCGA-DU-6396	-0.348813	IDHmut-non-codel	TCGA
TCGA-DU-6397	0.3828	IDHmut-codel	TCGA
TCGA-DU-6399	-0.747364	IDHmut-non-codel	TCGA
TCGA-DU-6400	-0.0701538	IDHmut-codel	TCGA
TCGA-DU-6401	1.21575	IDHmut-non-codel	TCGA
TCGA-DU-6402	2.32831	IDHwt	TCGA
TCGA-DU-6403	-0.755582	IDHwt	TCGA
TCGA-DU-6404	1.18242	IDHwt	TCGA
TCGA-DU-6405	0.8797	IDHwt	TCGA
TCGA-DU-6406	0.855755	IDHwt	TCGA
TCGA-DU-6407	-0.717957	IDHmut-non-codel	TCGA
TCGA-DU-6408	-0.59139	IDHmut-non-codel	TCGA
TCGA-DU-6410	-1.36131	IDHmut-codel	TCGA
TCGA-DU-6542	-0.0504335	IDHmut-non-codel	TCGA
TCGA-DU-7006	1.32551	IDHwt	TCGA
TCGA-DU-7007	0.895052	IDHmut-non-codel	TCGA
TCGA-DU-7008	-1.04814	IDHmut-non-codel	TCGA
TCGA-DU-7009	-1.51957	IDHmut-codel	TCGA
TCGA-DU-7010	-0.663628	IDHmut-non-codel	TCGA
TCGA-DU-7011	-0.310235	IDHmut-non-codel	TCGA
TCGA-DU-7012	0.0304418	IDHwt	TCGA
TCGA-DU-7013	-0.381713	IDHwt	TCGA
TCGA-DU-7015	-0.834111	IDHmut-non-codel	TCGA
TCGA-DU-7018	-0.404556	IDHmut-codel	TCGA
TCGA-DU-7019	0.078016	IDHmut-non-codel	TCGA
TCGA-DU-7290	0.916448	IDHwt	TCGA
TCGA-DU-7292	-0.0618032	IDHwt	TCGA
TCGA-DU-7294	-2.31154	IDHmut-codel	TCGA
TCGA-DU-7298	-0.493843	IDHmut-non-codel	TCGA
TCGA-DU-7299	-0.336259	IDHmut-non-codel	TCGA
TCGA-DU-7300	-0.984292	IDHmut-codel	TCGA
TCGA-DU-7301	-0.487756	IDHmut-non-codel	TCGA
TCGA-DU-7302	-0.591999	IDHmut-codel	TCGA
TCGA-DU-7304	-0.357506	IDHmut-non-codel	TCGA
TCGA-DU-7306	-0.270466	IDHmut-non-codel	TCGA
TCGA-DU-7309	-0.732906	IDHmut-non-codel	TCGA
TCGA-DU-8158	-0.106708	IDHwt	TCGA
TCGA-DU-8161	0.934577	IDHwt	TCGA
TCGA-DU-8162	-0.132821	IDHwt	TCGA
TCGA-DU-8163	-0.989879	IDHmut-non-codel	TCGA
TCGA-DU-8164	-1.4746	IDHmut-codel	TCGA
TCGA-DU-8165	-0.81935	IDHwt	TCGA
TCGA-DU-8166	0.506514	IDHmut-non-codel	TCGA
TCGA-DU-8167	0.146694	IDHmut-non-codel	TCGA
TCGA-DU-8168	-0.278176	IDHmut-codel	TCGA
TCGA-DU-A5TP	2.938	IDHmut-non-codel	TCGA
TCGA-DU-A5TR	0.369163	IDHmut-non-codel	TCGA
TCGA-DU-A5TS	-0.347687	IDHmut-non-codel	TCGA
TCGA-DU-A5TT	0.86356	IDHwt	TCGA
TCGA-DU-A5TU	0.382147	IDHmut-non-codel	TCGA
TCGA-DU-A5TW	-0.0802081	IDHmut-non-codel	TCGA
TCGA-DU-A5TY	0.517151	IDHwt	TCGA
TCGA-DU-A6S2	1.7175	IDHmut-codel	TCGA
TCGA-DU-A6S3	-0.48083	IDHmut-codel	TCGA
TCGA-DU-A6S6	-1.45516	IDHmut-codel	TCGA
TCGA-DU-A6S7	0.23812	IDHmut-non-codel	TCGA
TCGA-DU-A6S8	-1.67475	IDHmut-codel	TCGA
TCGA-DU-A76K	-0.419607	IDHwt	TCGA
TCGA-DU-A76L	1.07804	IDHwt	TCGA
TCGA-DU-A76O	-0.870337	IDHmut-non-codel	TCGA
TCGA-DU-A76R	-1.1731	IDHmut-codel	TCGA
TCGA-DU-A7T6	-0.167005	IDHmut-codel	TCGA
TCGA-DU-A7T8	-0.475845	IDHmut-non-codel	TCGA
TCGA-DU-A7TA	-0.307582	IDHmut-non-codel	TCGA
TCGA-DU-A7TB	-1.10518	IDHwt	TCGA
TCGA-DU-A7TC	-0.895746	IDHmut-non-codel	TCGA
TCGA-DU-A7TD	0.173231	IDHwt	TCGA
TCGA-DU-A7TG	0.0925437	IDHmut-non-codel	TCGA
TCGA-DU-A7TJ	0.381285	IDHwt	TCGA
TCGA-E1-5302	0.182453	IDHmut-non-codel	TCGA
TCGA-E1-5303	-0.0162134	IDHmut-non-codel	TCGA
TCGA-E1-5304	-1.4154	IDHmut-non-codel	TCGA
TCGA-E1-5305	-0.79384	IDHmut-non-codel	TCGA
TCGA-E1-5307	-0.505197	IDHmut-non-codel	TCGA
TCGA-E1-5311	-0.824505	IDHmut-codel	TCGA
TCGA-E1-5318	-1.61256	IDHmut-codel	TCGA
TCGA-E1-5319	-0.263399	IDHmut-codel	TCGA
TCGA-E1-5322	0.600043	IDHmut-non-codel	TCGA
TCGA-E1-A7YD	-0.246403	IDHwt	TCGA
TCGA-E1-A7YE	0.786948	IDHmut-non-codel	TCGA
TCGA-E1-A7YH	-0.229289	IDHmut-non-codel	TCGA
TCGA-E1-A7YI	1.36638	IDHmut-non-codel	TCGA
TCGA-E1-A7YJ	1.30057	IDHwt	TCGA
TCGA-E1-A7YK	0.537282	IDHmut-non-codel	TCGA
TCGA-E1-A7YL	0.420218	IDHwt	TCGA
TCGA-E1-A7YM	-1.51373	IDHwt	TCGA
TCGA-E1-A7YN	1.26787	IDHwt	TCGA
TCGA-E1-A7YO	-0.690788	IDHmut-codel	TCGA
TCGA-E1-A7YQ	0.517892	IDHwt	TCGA
TCGA-E1-A7YS	-0.121384	IDHmut-codel	TCGA
TCGA-E1-A7YU	-0.421909	IDHmut-non-codel	TCGA
TCGA-E1-A7YV	-0.00198076	IDHmut-non-codel	TCGA
TCGA-E1-A7YW	0.764057	IDHmut-non-codel	TCGA
TCGA-E1-A7YY	-0.16685	IDHmut-non-codel	TCGA
TCGA-E1-A7Z2	0.0251422	IDHwt	TCGA
TCGA-E1-A7Z3	1.35869	IDHmut-non-codel	TCGA
TCGA-E1-A7Z4	-0.32436	IDHmut-non-codel	TCGA
TCGA-E1-A7Z6	-0.283385	IDHmut-non-codel	TCGA
TCGA-EZ-7264	-1.61797	IDHmut-codel	TCGA
TCGA-F6-A8O3	-1.58912	IDHmut-codel	TCGA
TCGA-F6-A8O4	-1.77327	IDHmut-non-codel	TCGA
TCGA-FG-5962	-0.537257	IDHmut-codel	TCGA
TCGA-FG-5963	0.249607	IDHwt	TCGA
TCGA-FG-5964	0.140922	IDHmut-codel	TCGA
TCGA-FG-5965	0.0399265	IDHmut-non-codel	TCGA
TCGA-FG-6688	1.54462	IDHwt	TCGA
TCGA-FG-6689	-0.182819	IDHmut-non-codel	TCGA
TCGA-FG-6690	-0.947906	IDHmut-non-codel	TCGA
TCGA-FG-6691	-0.918621	IDHmut-non-codel	TCGA
TCGA-FG-6692	0.973193	IDHwt	TCGA
TCGA-FG-7634	0.398102	IDHmut-codel	TCGA
TCGA-FG-7636	-0.368908	IDHmut-non-codel	TCGA
TCGA-FG-7637	0.584629	IDHmut-non-codel	TCGA
TCGA-FG-7638	-0.372021	IDHmut-codel	TCGA
TCGA-FG-7641	-1.90708	IDHmut-codel	TCGA
TCGA-FG-7643	0.63759	IDHwt	TCGA
TCGA-FG-8181	0.824562	IDHwt	TCGA
TCGA-FG-8182	-0.960576	IDHmut-non-codel	TCGA
TCGA-FG-8185	-0.80427	IDHmut-non-codel	TCGA
TCGA-FG-8186	-0.552595	IDHmut-codel	TCGA
TCGA-FG-8187	-0.671284	IDHmut-codel	TCGA
TCGA-FG-8188	-1.00006	IDHmut-non-codel	TCGA
TCGA-FG-8189	-2.15251	IDHmut-non-codel	TCGA
TCGA-FG-8191	1.88986	IDHmut-non-codel	TCGA
TCGA-FG-A4MT	-1.10728	IDHmut-non-codel	TCGA
TCGA-FG-A4MU	0.964517	IDHwt	TCGA
TCGA-FG-A4MW	-0.103346	IDHwt	TCGA
TCGA-FG-A4MX	0.759897	IDHmut-non-codel	TCGA
TCGA-FG-A4MY	-0.431748	IDHmut-non-codel	TCGA
TCGA-FG-A60J	-0.0815196	IDHmut-non-codel	TCGA
TCGA-FG-A60K	-0.00441005	IDHmut-codel	TCGA
TCGA-FG-A60L	-0.0678608	IDHmut-non-codel	TCGA
TCGA-FG-A6IZ	-1.27777	IDHmut-codel	TCGA
TCGA-FG-A6J1	-1.22734	IDHmut-codel	TCGA
TCGA-FG-A6J3	0.607755	IDHmut-non-codel	TCGA
TCGA-FG-A70Y	-0.936581	IDHmut-non-codel	TCGA
TCGA-FG-A70Z	0.210005	IDHwt	TCGA
TCGA-FG-A710	0.104445	IDHmut-codel	TCGA
TCGA-FG-A711	-0.872959	IDHmut-non-codel	TCGA
TCGA-FG-A713	-0.82621	IDHmut-codel	TCGA
TCGA-FG-A87N	0.0950943	IDHmut-non-codel	TCGA
TCGA-FG-A87Q	0.682184	IDHwt	TCGA
TCGA-FN-7833	-0.100522	IDHmut-non-codel	TCGA
TCGA-HT-7467	-1.17147	IDHmut-codel	TCGA
TCGA-HT-7468	-1.0597	IDHmut-codel	TCGA
TCGA-HT-7469	0.454154	IDHwt	TCGA
TCGA-HT-7470	-0.757444	IDHmut-non-codel	TCGA
TCGA-HT-7471	0.329729	IDHmut-codel	TCGA
TCGA-HT-7472	-0.876219	IDHmut-non-codel	TCGA
TCGA-HT-7473	-0.317619	IDHmut-non-codel	TCGA
TCGA-HT-7474	-0.389661	IDHmut-non-codel	TCGA
TCGA-HT-7475	-1.31922	IDHmut-non-codel	TCGA
TCGA-HT-7476	0.0542023	IDHmut-non-codel	TCGA
TCGA-HT-7477	0.0258304	IDHmut-non-codel	TCGA
TCGA-HT-7478	0.0976511	IDHmut-non-codel	TCGA
TCGA-HT-7479	-0.837436	IDHmut-non-codel	TCGA
TCGA-HT-7480	-0.902973	IDHmut-codel	TCGA
TCGA-HT-7481	-1.53038	IDHmut-codel	TCGA
TCGA-HT-7482	-0.0143168	IDHmut-non-codel	TCGA
TCGA-HT-7483	0.229832	IDHmut-non-codel	TCGA
TCGA-HT-7485	-1.39062	IDHmut-non-codel	TCGA
TCGA-HT-7601	-0.189529	IDHmut-non-codel	TCGA
TCGA-HT-7602	-0.95689	IDHmut-non-codel	TCGA
TCGA-HT-7603	-1.33114	IDHmut-non-codel	TCGA
TCGA-HT-7604	-0.146667	IDHmut-non-codel	TCGA
TCGA-HT-7605	-1.23145	IDHmut-codel	TCGA
TCGA-HT-7606	-0.804904	IDHmut-non-codel	TCGA
TCGA-HT-7607	-0.354782	IDHmut-codel	TCGA
TCGA-HT-7608	0.197771	IDHmut-codel	TCGA
TCGA-HT-7609	-0.173038	IDHmut-non-codel	TCGA
TCGA-HT-7610	-0.857442	IDHmut-non-codel	TCGA
TCGA-HT-7611	-0.675354	IDHmut-non-codel	TCGA
TCGA-HT-7616	0.242714	IDHmut-codel	TCGA
TCGA-HT-7620	-1.39149	IDHmut-codel	TCGA
TCGA-HT-7676	-0.774204	IDHmut-non-codel	TCGA
TCGA-HT-7677	-0.0852956	IDHmut-codel	TCGA
TCGA-HT-7680	0.192468	IDHwt	TCGA
TCGA-HT-7681	-1.25824	IDHmut-codel	TCGA
TCGA-HT-7684	1.78527	IDHmut-non-codel	TCGA
TCGA-HT-7686	-0.272429	IDHmut-non-codel	TCGA
TCGA-HT-7687	-0.935973	IDHmut-codel	TCGA
TCGA-HT-7688	-0.910411	IDHmut-non-codel	TCGA
TCGA-HT-7689	-0.735584	IDHmut-non-codel	TCGA
TCGA-HT-7690	0.00881097	IDHmut-non-codel	TCGA
TCGA-HT-7691	1.59906	IDHwt	TCGA
TCGA-HT-7692	-0.497146	IDHmut-codel	TCGA
TCGA-HT-7693	0.863044	IDHmut-non-codel	TCGA
TCGA-HT-7694	-1.36501	IDHmut-codel	TCGA
TCGA-HT-7695	-2.82195	IDHmut-codel	TCGA
TCGA-HT-7854	0.981832	IDHwt	TCGA
TCGA-HT-7855	-0.66503	IDHmut-non-codel	TCGA
TCGA-HT-7856	-1.61284	IDHmut-codel	TCGA
TCGA-HT-7857	1.87861	IDHwt	TCGA
TCGA-HT-7858	-0.373573	IDHmut-non-codel	TCGA
TCGA-HT-7860	0.0688756	IDHwt	TCGA
TCGA-HT-7873	-0.654543	IDHmut-non-codel	TCGA
TCGA-HT-7874	-0.899137	IDHmut-codel	TCGA
TCGA-HT-7875	-1.32234	IDHmut-codel	TCGA
TCGA-HT-7877	-0.357354	IDHmut-codel	TCGA
TCGA-HT-7879	-1.06814	IDHmut-non-codel	TCGA
TCGA-HT-7880	-1.26639	IDHmut-non-codel	TCGA
TCGA-HT-7881	-2.15782	IDHmut-codel	TCGA
TCGA-HT-7882	2.6096	IDHwt	TCGA
TCGA-HT-7884	-1.28817	IDHmut-non-codel	TCGA
TCGA-HT-7902	-0.639669	IDHmut-non-codel	TCGA
TCGA-HT-8010	-1.02725	IDHmut-codel	TCGA
TCGA-HT-8011	0.151373	IDHwt	TCGA
TCGA-HT-8012	-1.54619	IDHmut-codel	TCGA
TCGA-HT-8013	-0.0326589	IDHmut-non-codel	TCGA
TCGA-HT-8015	0.169701	IDHwt	TCGA
TCGA-HT-8018	0.881502	IDHmut-non-codel	TCGA
TCGA-HT-8019	-1.45816	IDHwt	TCGA
TCGA-HT-8104	0.541066	IDHwt	TCGA
TCGA-HT-8105	1.75064	IDHmut-codel	TCGA
TCGA-HT-8106	0.555579	IDHmut-non-codel	TCGA
TCGA-HT-8107	0.65044	IDHwt	TCGA
TCGA-HT-8108	-1.04707	IDHmut-non-codel	TCGA
TCGA-HT-8109	-1.55348	IDHmut-codel	TCGA
TCGA-HT-8110	0.0154684	IDHwt	TCGA
TCGA-HT-8111	-0.191645	IDHmut-non-codel	TCGA
TCGA-HT-8113	-0.746947	IDHmut-non-codel	TCGA
TCGA-HT-8114	-0.600207	IDHmut-non-codel	TCGA
TCGA-HT-8558	-0.747846	IDHwt	TCGA
TCGA-HT-8563	0.758281	IDHmut-non-codel	TCGA
TCGA-HT-8564	-0.155623	IDHwt	TCGA
TCGA-HT-A4DS	0.998048	IDHwt	TCGA
TCGA-HT-A4DV	-0.185226	IDHmut-codel	TCGA
TCGA-HT-A5R5	2.21559	IDHmut-non-codel	TCGA
TCGA-HT-A5R7	-0.174061	IDHmut-non-codel	TCGA
TCGA-HT-A5R9	-1.42522	IDHmut-codel	TCGA
TCGA-HT-A5RA	1.23886	IDHwt	TCGA
TCGA-HT-A5RB	-1.61801	IDHmut-non-codel	TCGA
TCGA-HT-A5RC	1.1092	IDHwt	TCGA
TCGA-HT-A614	-1.37265	IDHmut-non-codel	TCGA
TCGA-HT-A615	-1.90262	IDHmut-codel	TCGA
TCGA-HT-A616	0.732434	IDHmut-non-codel	TCGA
TCGA-HT-A617	0.9787	IDHwt	TCGA
TCGA-HT-A618	0.532997	IDHmut-non-codel	TCGA
TCGA-HT-A619	-0.914519	IDHmut-codel	TCGA
TCGA-HT-A61A	-1.95669	IDHmut-non-codel	TCGA
TCGA-HT-A61B	0.221333	IDHmut-non-codel	TCGA
TCGA-HT-A61C	1.37415	IDHwt	TCGA
TCGA-HT-A74H	-0.638082	IDHwt	TCGA
TCGA-HT-A74J	-0.173577	IDHmut-non-codel	TCGA
TCGA-HT-A74K	0.00338707	IDHmut-codel	TCGA
TCGA-HT-A74L	0.10294	IDHmut-codel	TCGA
TCGA-HT-A74O	0.136234	IDHmut-non-codel	TCGA
TCGA-HW-7486	-1.11679	IDHmut-codel	TCGA
TCGA-HW-7487	-2.15778	IDHmut-codel	TCGA
TCGA-HW-7489	-0.948809	IDHmut-non-codel	TCGA
TCGA-HW-7490	-0.104127	IDHmut-non-codel	TCGA
TCGA-HW-7491	-1.49431	IDHmut-codel	TCGA
TCGA-HW-7495	0.283242	IDHmut-codel	TCGA
TCGA-HW-8319	0.501413	IDHmut-non-codel	TCGA
TCGA-HW-8320	-0.573197	IDHmut-non-codel	TCGA
TCGA-HW-8321	0.44958	IDHmut-non-codel	TCGA
TCGA-HW-8322	-0.339595	IDHmut-codel	TCGA
TCGA-HW-A5KJ	0.628331	IDHmut-codel	TCGA
TCGA-HW-A5KK	0.810082	IDHwt	TCGA
TCGA-HW-A5KL	-1.22398	IDHmut-non-codel	TCGA
TCGA-HW-A5KM	-0.135792	IDHmut-non-codel	TCGA
TCGA-IK-7675	-1.12877	IDHmut-non-codel	TCGA
TCGA-IK-8125	-0.630993	IDHmut-codel	TCGA
TCGA-KT-A74X	-0.242396	IDHmut-codel	TCGA
TCGA-KT-A7W1	1.36581	IDHwt	TCGA
TCGA-P5-A5ET	-1.74025	IDHmut-codel	TCGA
TCGA-P5-A5EU	0.712826	IDHmut-non-codel	TCGA
TCGA-P5-A5EV	-0.93305	IDHmut-non-codel	TCGA
TCGA-P5-A5EW	-0.332611	IDHmut-non-codel	TCGA
TCGA-P5-A5EX	0.808638	IDHmut-codel	TCGA
TCGA-P5-A5EY	-0.335936	IDHwt	TCGA
TCGA-P5-A5EZ	-0.539554	IDHmut-non-codel	TCGA
TCGA-P5-A5F0	-1.49329	IDHmut-codel	TCGA
TCGA-P5-A5F1	-0.551689	IDHmut-non-codel	TCGA
TCGA-P5-A5F2	0.475509	IDHmut-non-codel	TCGA
TCGA-P5-A5F4	-1.24227	IDHmut-non-codel	TCGA
TCGA-P5-A5F6	0.0198832	IDHwt	TCGA
TCGA-P5-A72U	0.546823	IDHwt	TCGA
TCGA-P5-A72W	0.134785	IDHmut-non-codel	TCGA
TCGA-P5-A72X	-0.296595	IDHmut-non-codel	TCGA
TCGA-P5-A72Z	-1.24974	IDHmut-codel	TCGA
TCGA-P5-A730	0.140751	IDHmut-codel	TCGA
TCGA-P5-A731	0.1447	IDHmut-non-codel	TCGA
TCGA-P5-A733	-0.587363	IDHmut-non-codel	TCGA
TCGA-P5-A735	-1.03125	IDHmut-non-codel	TCGA
TCGA-P5-A736	0.153542	IDHmut-non-codel	TCGA
TCGA-P5-A737	-0.888681	IDHmut-codel	TCGA
TCGA-P5-A77W	-0.292084	IDHmut-codel	TCGA
TCGA-P5-A77X	-1.09436	IDHmut-codel	TCGA
TCGA-P5-A780	0.194223	IDHmut-non-codel	TCGA
TCGA-P5-A781	-1.09896	IDHmut-codel	TCGA
TCGA-QH-A65R	0.927244	IDHmut-codel	TCGA
TCGA-QH-A65S	-0.701868	IDHmut-non-codel	TCGA
TCGA-QH-A65V	-0.192027	IDHmut-codel	TCGA
TCGA-QH-A65X	0.740587	IDHmut-codel	TCGA
TCGA-QH-A65Z	-0.641428	IDHmut-codel	TCGA
TCGA-QH-A6CS	-0.336306	IDHwt	TCGA
TCGA-QH-A6CU	-0.918021	IDHmut-codel	TCGA
TCGA-QH-A6CV	0.320197	IDHwt	TCGA
TCGA-QH-A6CW	1.43747	IDHmut-non-codel	TCGA
TCGA-QH-A6CX	0.354057	IDHwt	TCGA
TCGA-QH-A6CY	-1.11873	IDHmut-codel	TCGA
TCGA-QH-A6CZ	-0.910257	IDHmut-codel	TCGA
TCGA-QH-A6X3	0.019337	IDHmut-non-codel	TCGA
TCGA-QH-A6X4	-1.85358	IDHmut-codel	TCGA
TCGA-QH-A6X5	-0.161109	IDHmut-codel	TCGA
TCGA-QH-A6X8	-1.38833	IDHmut-codel	TCGA
TCGA-QH-A6X9	-1.28397	IDHmut-non-codel	TCGA
TCGA-QH-A6XA	-0.673843	IDHmut-non-codel	TCGA
TCGA-QH-A6XC	0.731892	IDHwt	TCGA
TCGA-QH-A86X	-1.80484	IDHmut-codel	TCGA
TCGA-QH-A870	-1.21406	IDHmut-non-codel	TCGA
TCGA-R8-A6MK	-0.56554	IDHmut-codel	TCGA
TCGA-R8-A6ML	0.00272008	IDHmut-codel	TCGA
TCGA-R8-A6MO	0.132622	IDHmut-codel	TCGA
TCGA-R8-A6YH	0.790913	IDHmut-non-codel	TCGA
TCGA-R8-A73M	-1.75048	IDHmut-codel	TCGA
TCGA-RY-A83X	-1.35686	IDHmut-codel	TCGA
TCGA-RY-A83Y	-0.18116	IDHmut-codel	TCGA
TCGA-RY-A83Z	-0.298131	IDHmut-non-codel	TCGA
TCGA-RY-A840	-2.40023	IDHmut-codel	TCGA
TCGA-RY-A843	0.868474	IDHmut-non-codel	TCGA
TCGA-RY-A845	-1.07489	IDHmut-non-codel	TCGA
TCGA-RY-A847	-0.485479	IDHmut-codel	TCGA
TCGA-S9-A6TS	-0.360056	IDHmut-non-codel	TCGA
TCGA-S9-A6TU	-0.355894	IDHmut-non-codel	TCGA
TCGA-S9-A6TV	1.21191	IDHmut-non-codel	TCGA
TCGA-S9-A6TW	0.139567	IDHmut-codel	TCGA
TCGA-S9-A6TX	-0.546748	IDHmut-codel	TCGA
TCGA-S9-A6TY	-1.56276	IDHmut-codel	TCGA
TCGA-S9-A6TZ	-0.663922	IDHmut-non-codel	TCGA
TCGA-S9-A6U0	0.567253	IDHwt	TCGA
TCGA-S9-A6U1	-1.44361	IDHmut-non-codel	TCGA
TCGA-S9-A6U2	-0.65517	IDHmut-codel	TCGA
TCGA-S9-A6U5	-0.318903	IDHmut-codel	TCGA
TCGA-S9-A6U6	0.263712	IDHmut-non-codel	TCGA
TCGA-S9-A6U8	-1.57807	IDHmut-non-codel	TCGA
TCGA-S9-A6U9	1.83108	IDHmut-non-codel	TCGA
TCGA-S9-A6UA	1.14646	IDHwt	TCGA
TCGA-S9-A6UB	-1.59227	IDHmut-codel	TCGA
TCGA-S9-A6WD	-1.31194	IDHmut-codel	TCGA
TCGA-S9-A6WE	-0.232647	IDHmut-codel	TCGA
TCGA-S9-A6WG	2.00981	IDHmut-non-codel	TCGA
TCGA-S9-A6WH	-1.15559	IDHmut-codel	TCGA
TCGA-S9-A6WI	0.217083	IDHmut-non-codel	TCGA
TCGA-S9-A6WL	0.454882	IDHmut-codel	TCGA
TCGA-S9-A6WM	0.0524701	IDHwt	TCGA
TCGA-S9-A6WN	1.62005	IDHmut-codel	TCGA
TCGA-S9-A6WO	-1.33872	IDHmut-non-codel	TCGA
TCGA-S9-A6WP	-0.760297	IDHmut-codel	TCGA
TCGA-S9-A6WQ	-0.766813	IDHmut-non-codel	TCGA
TCGA-S9-A7IQ	-1.02044	IDHmut-codel	TCGA
TCGA-S9-A7IS	1.1796	IDHmut-non-codel	TCGA
TCGA-S9-A7IX	0.493824	IDHwt	TCGA
TCGA-S9-A7IY	-0.52935	IDHmut-codel	TCGA
TCGA-S9-A7IZ	-0.283761	IDHmut-non-codel	TCGA
TCGA-S9-A7J0	-0.491763	IDHmut-non-codel	TCGA
TCGA-S9-A7J1	-0.796567	IDHmut-codel	TCGA
TCGA-S9-A7J2	-0.617124	IDHmut-codel	TCGA
TCGA-S9-A7J3	-0.0215946	IDHmut-codel	TCGA
TCGA-S9-A7QW	-1.27829	IDHmut-non-codel	TCGA
TCGA-S9-A7QX	-0.344329	IDHmut-non-codel	TCGA
TCGA-S9-A7QY	-1.35211	IDHmut-codel	TCGA
TCGA-S9-A7QZ	-0.982859	IDHmut-codel	TCGA
TCGA-S9-A7R1	0.204824	IDHmut-codel	TCGA
TCGA-S9-A7R2	-0.590226	IDHwt	TCGA
TCGA-S9-A7R3	-0.380958	IDHmut-non-codel	TCGA
TCGA-S9-A7R4	0.0177228	IDHmut-non-codel	TCGA
TCGA-S9-A7R7	0.615441	IDHmut-non-codel	TCGA
TCGA-S9-A7R8	-0.323274	IDHmut-non-codel	TCGA
TCGA-S9-A89V	0.107211	IDHwt	TCGA
TCGA-S9-A89Z	-0.348693	IDHmut-non-codel	TCGA
TCGA-TM-A7C3	0.0707538	IDHwt	TCGA
TCGA-TM-A7C4	-0.971857	IDHmut-non-codel	TCGA
TCGA-TM-A7C5	0.247487	IDHmut-codel	TCGA
TCGA-TM-A7CA	-1.2681	IDHmut-non-codel	TCGA
TCGA-TM-A7CF	-0.845574	IDHmut-non-codel	TCGA
TCGA-TM-A84B	-0.841484	IDHwt	TCGA
TCGA-TM-A84C	1.853	IDHwt	TCGA
TCGA-TM-A84F	0.144395	IDHmut-non-codel	TCGA
TCGA-TM-A84G	-1.41939	IDHmut-codel	TCGA
TCGA-TM-A84H	-0.563976	IDHmut-non-codel	TCGA
TCGA-TM-A84I	0.111445	IDHmut-non-codel	TCGA
TCGA-TM-A84J	0.062352	IDHwt	TCGA
TCGA-TM-A84L	-0.776554	IDHmut-non-codel	TCGA
TCGA-TM-A84M	-0.913908	IDHmut-codel	TCGA
TCGA-TM-A84O	0.135265	IDHmut-codel	TCGA
TCGA-TM-A84Q	0.243708	IDHmut-non-codel	TCGA
TCGA-TM-A84R	-1.827	IDHmut-codel	TCGA
TCGA-TM-A84S	-0.947713	IDHmut-codel	TCGA
TCGA-TM-A84T	-0.833933	IDHmut-non-codel	TCGA
TCGA-TQ-A7RF	0.520105	IDHmut-non-codel	TCGA
TCGA-TQ-A7RG	-1.0041	IDHmut-codel	TCGA
TCGA-TQ-A7RH	-0.364798	IDHmut-non-codel	TCGA
TCGA-TQ-A7RI	-1.4133	IDHmut-codel	TCGA
TCGA-TQ-A7RJ	-0.730829	IDHmut-non-codel	TCGA
TCGA-TQ-A7RK	-0.73474	IDHmut-non-codel	TCGA
TCGA-TQ-A7RM	-1.00195	IDHmut-non-codel	TCGA
TCGA-TQ-A7RN	-1.48946	IDHmut-codel	TCGA
TCGA-TQ-A7RO	0.369423	IDHmut-codel	TCGA
TCGA-TQ-A7RP	0.232193	IDHwt	TCGA
TCGA-TQ-A7RQ	-1.17393	IDHmut-codel	TCGA
TCGA-TQ-A7RR	-0.98828	IDHmut-non-codel	TCGA
TCGA-TQ-A7RS	-0.424684	IDHmut-codel	TCGA
TCGA-TQ-A7RU	-1.61423	IDHmut-codel	TCGA
TCGA-TQ-A7RV	-1.47188	IDHmut-non-codel	TCGA
TCGA-TQ-A7RW	-1.35435	IDHmut-non-codel	TCGA
TCGA-TQ-A8XE	0.202787	IDHmut-non-codel	TCGA
TCGA-VM-A8C8	-0.475203	IDHmut-non-codel	TCGA
TCGA-VM-A8C9	0.410798	IDHwt	TCGA
TCGA-VM-A8CA	0.774273	IDHmut-non-codel	TCGA
TCGA-VM-A8CB	-1.2691	IDHmut-codel	TCGA
TCGA-VM-A8CD	2.1136	IDHwt	TCGA
TCGA-VM-A8CE	0.14573	IDHmut-codel	TCGA
TCGA-VM-A8CF	0.380211	IDHmut-non-codel	TCGA
TCGA-VM-A8CH	0.0918586	IDHmut-non-codel	TCGA
TCGA-VV-A829	-0.21614	IDHmut-codel	TCGA
TCGA-VV-A86M	-0.588656	IDHmut-non-codel	TCGA
TCGA-VW-A7QS	0.234438	IDHmut-codel	TCGA
TCGA-VW-A8FI	1.24738	IDHwt	TCGA
TCGA-W9-A837	-1.62891	IDHmut-codel	TCGA
TCGA-WH-A86K	-0.484507	IDHmut-non-codel	TCGA
TCGA-WY-A858	-0.487992	IDHmut-non-codel	TCGA
TCGA-WY-A859	-0.792583	IDHmut-non-codel	TCGA
TCGA-WY-A85A	-1.25513	IDHmut-non-codel	TCGA
TCGA-WY-A85B	-0.773394	IDHmut-non-codel	TCGA
TCGA-WY-A85C	-0.328221	IDHmut-non-codel	TCGA
TCGA-WY-A85D	-0.760339	IDHmut-non-codel	TCGA
TCGA-WY-A85E	-0.790369	IDHmut-non-codel	TCGA
CGGA_1001	1.76593	IDHwt	CGGA
CGGA_1002	-0.0964444	IDHwt	CGGA
CGGA_1003	-1.09923	IDHmut-codel	CGGA
CGGA_1004	0.502838	IDHwt	CGGA
CGGA_1005	-1.2648	IDHmut-non-codel	CGGA
CGGA_1006	0.589159	IDHwt	CGGA
CGGA_1007	0.0795787	IDHwt	CGGA
CGGA_1008	0.816558	IDHwt	CGGA
CGGA_1011	2.21772	IDHwt	CGGA
CGGA_1012	0.0840685	IDHmut-non-codel	CGGA
CGGA_1013	-0.852467	IDHmut-non-codel	CGGA
CGGA_1014	0.526564	IDHwt	CGGA
CGGA_1015	1.84431	IDHwt	CGGA
CGGA_1017	-1.20151	IDHwt	CGGA
CGGA_1018	-0.956365	IDHmut-codel	CGGA
CGGA_1019	2.97216	IDHwt	CGGA
CGGA_1020	-0.403878	IDHmut-non-codel	CGGA
CGGA_1022	1.84016	IDHwt	CGGA
CGGA_1023	0.425017	IDHwt	CGGA
CGGA_1024	1.67534	IDHwt	CGGA
CGGA_1026	-0.382645	IDHwt	CGGA
CGGA_1027	-0.25736	IDHmut-codel	CGGA
CGGA_103	-1.24861	IDHmut-non-codel	CGGA
CGGA_1030	-0.885964	IDHmut-non-codel	CGGA
CGGA_1031	-0.932366	IDHmut-non-codel	CGGA
CGGA_1034	1.07668	IDHwt	CGGA
CGGA_1035	3.39034	IDHwt	CGGA
CGGA_1036	1.67339	IDHwt	CGGA
CGGA_1039	0.629783	IDHwt	CGGA
CGGA_1041	-0.897372	IDHwt	CGGA
CGGA_1045	1.8259	IDHwt	CGGA
CGGA_1048	0.879059	IDHwt	CGGA
CGGA_1049	1.20978	IDHwt	CGGA
CGGA_1050	-0.788535	IDHmut-codel	CGGA
CGGA_1052	-0.699429	IDHmut-codel	CGGA
CGGA_1053	0.941975	IDHwt	CGGA
CGGA_1055	-0.541228	IDHmut-non-codel	CGGA
CGGA_1057	0.555483	IDHwt	CGGA
CGGA_1058	-0.411052	IDHmut-non-codel	CGGA
CGGA_1059	-0.778251	IDHmut-non-codel	CGGA
CGGA_106	0.395517	IDHwt	CGGA
CGGA_1060	-0.718584	IDHmut-non-codel	CGGA
CGGA_1061	-0.599936	IDHmut-non-codel	CGGA
CGGA_1065	-1.00608	IDHmut-codel	CGGA
CGGA_1066	-0.0495788	IDHmut-non-codel	CGGA
CGGA_1068	0.787278	IDHmut-non-codel	CGGA
CGGA_1069	2.13252	IDHmut-non-codel	CGGA
CGGA_107	1.2294	IDHwt	CGGA
CGGA_1070	0.895662	IDHwt	CGGA
CGGA_1071	0.794108	IDHwt	CGGA
CGGA_1072	0.912005	IDHwt	CGGA
CGGA_1073	0.825405	IDHwt	CGGA
CGGA_1074	1.35468	IDHwt	CGGA
CGGA_1075	1.22039	IDHwt	CGGA
CGGA_1077	1.58363	IDHwt	CGGA
CGGA_1078	0.161749	IDHwt	CGGA
CGGA_1079	-0.191155	IDHwt	CGGA
CGGA_108	0.119309	IDHwt	CGGA
CGGA_1081	0.816558	IDHwt	CGGA
CGGA_1082	-0.220729	IDHmut-non-codel	CGGA
CGGA_1083	1.38475	IDHwt	CGGA
CGGA_1087	-1.44215	IDHmut-codel	CGGA
CGGA_1091	1.96487	IDHwt	CGGA
CGGA_1094	-0.151111	IDHmut-non-codel	CGGA
CGGA_1095	0.226257	IDHmut-non-codel	CGGA
CGGA_1097	0.0750694	IDHwt	CGGA
CGGA_1099	-0.462704	IDHwt	CGGA
CGGA_1103	-0.447683	IDHmut-non-codel	CGGA
CGGA_1105	0.796375	IDHmut-non-codel	CGGA
CGGA_1106	1.928	IDHwt	CGGA
CGGA_1108	0.735775	IDHwt	CGGA
CGGA_1109	-0.117969	IDHwt	CGGA
CGGA_1111	0.127936	IDHmut-non-codel	CGGA
CGGA_1113	-0.747991	IDHmut-codel	CGGA
CGGA_1114	0.33036	IDHwt	CGGA
CGGA_1116	-0.470296	IDHmut-non-codel	CGGA
CGGA_1118	-0.0546834	IDHmut-non-codel	CGGA
CGGA_1119	-0.354991	IDHmut-codel	CGGA
CGGA_112	-0.671341	IDHmut-non-codel	CGGA
CGGA_1121	-1.21698	IDHmut-non-codel	CGGA
CGGA_1124	2.77153	IDHwt	CGGA
CGGA_1126	-0.156738	IDHmut-non-codel	CGGA
CGGA_1129	-0.25736	IDHmut-non-codel	CGGA
CGGA_1130	0.00980523	IDHmut-non-codel	CGGA
CGGA_1131	-0.533105	IDHmut-non-codel	CGGA
CGGA_1132	-0.980928	IDHmut-codel	CGGA
CGGA_1134	3.03528	IDHwt	CGGA
CGGA_1135	0.993844	IDHwt	CGGA
CGGA_1136	0.194501	IDHmut-non-codel	CGGA
CGGA_1138	-0.591345	IDHwt	CGGA
CGGA_1139	1.33052	IDHwt	CGGA
CGGA_1140	-1.20151	IDHwt	CGGA
CGGA_1141	-0.389675	IDHwt	CGGA
CGGA_1142	0.033585	IDHwt	CGGA
CGGA_1144	-0.980928	IDHwt	CGGA
CGGA_1145	2.13126	IDHwt	CGGA
CGGA_1146	0.00498357	IDHmut-non-codel	CGGA
CGGA_1147	-1.36756	IDHmut-non-codel	CGGA
CGGA_1148	0.412008	IDHmut-non-codel	CGGA
CGGA_1152	0.93208	IDHwt	CGGA
CGGA_1154	-0.447683	IDHmut-non-codel	CGGA
CGGA_1155	-0.920571	IDHmut-codel	CGGA
CGGA_1156	0.000139542	IDHmut-non-codel	CGGA
CGGA_1157	-0.541228	IDHwt	CGGA
CGGA_1158	-0.874678	IDHmut-codel	CGGA
CGGA_1159	0.453705	IDHmut-non-codel	CGGA
CGGA_1160	1.27333	IDHmut-non-codel	CGGA
CGGA_1161	-0.932366	IDHmut-non-codel	CGGA
CGGA_1164	-1.18627	IDHmut-codel	CGGA
CGGA_1169	-0.470296	IDHmut-non-codel	CGGA
CGGA_1170	-0.517045	IDHmut-non-codel	CGGA
CGGA_1171	0.679068	IDHwt	CGGA
CGGA_1172	0.024138	IDHmut-non-codel	CGGA
CGGA_1175	0.415276	IDHmut-non-codel	CGGA
CGGA_1177	2.17569	IDHwt	CGGA
CGGA_1178	-0.699429	IDHmut-non-codel	CGGA
CGGA_1180	1.83598	IDHwt	CGGA
CGGA_1181	-0.232797	IDHmut-non-codel	CGGA
CGGA_1183	0.000139542	IDHwt	CGGA
CGGA_1184	0.30891	IDHmut-non-codel	CGGA
CGGA_1185	0.897719	IDHwt	CGGA
CGGA_1188	1.20059	IDHmut-non-codel	CGGA
CGGA_1189	-1.0854	IDHmut-codel	CGGA
CGGA_1190	-0.591345	IDHmut-non-codel	CGGA
CGGA_1191	-0.191155	IDHmut-codel	CGGA
CGGA_1192	1.89532	IDHmut-non-codel	CGGA
CGGA_1195	-0.708963	IDHmut-non-codel	CGGA
CGGA_1197	-0.197003	IDHmut-codel	CGGA
CGGA_120	0.463096	IDHwt	CGGA
CGGA_1204	-0.920571	IDHmut-codel	CGGA
CGGA_1208	1.80025	IDHwt	CGGA
CGGA_1211	-0.173805	IDHmut-codel	CGGA
CGGA_1212	-0.99343	IDHmut-non-codel	CGGA
CGGA_1214	-0.107151	IDHwt	CGGA
CGGA_1215	-0.0244236	IDHmut-non-codel	CGGA
CGGA_1216	0.93605	IDHwt	CGGA
CGGA_1218	0.831991	IDHwt	CGGA
CGGA_1219	-0.208799	IDHmut-non-codel	CGGA
CGGA_1223	0.691661	IDHwt	CGGA
CGGA_1224	1.81144	IDHwt	CGGA
CGGA_1226	0.589159	IDHwt	CGGA
CGGA_1227	-0.788535	IDHwt	CGGA
CGGA_1228	0.368576	IDHwt	CGGA
CGGA_1231	0.541124	IDHwt	CGGA
CGGA_1232	0.149197	IDHmut-non-codel	CGGA
CGGA_1234	1.69659	IDHwt	CGGA
CGGA_1235	0.024138	IDHmut-non-codel	CGGA
CGGA_1236	-0.334721	IDHwt	CGGA
CGGA_1237	0.816558	IDHwt	CGGA
CGGA_1238	0.905906	IDHwt	CGGA
CGGA_1239	-0.757981	IDHmut-codel	CGGA
CGGA_1240	3.19206	IDHwt	CGGA
CGGA_1246	-1.31491	IDHmut-codel	CGGA
CGGA_1248	0.447398	IDHwt	CGGA
CGGA_1251	-0.778251	IDHwt	CGGA
CGGA_1255	2.49841	IDHwt	CGGA
CGGA_1257	0.0288722	IDHwt	CGGA
CGGA_1258	0.42178	IDHwt	CGGA
CGGA_1260	1.58469	IDHwt	CGGA
CGGA_1263	0.529492	IDHwt	CGGA
CGGA_1264	-0.699429	IDHmut-codel	CGGA
CGGA_1269	-0.582823	IDHmut-codel	CGGA
CGGA_1270	1.36917	IDHwt	CGGA
CGGA_1271	0.514769	IDHwt	CGGA
CGGA_1272	0.033585	IDHmut-non-codel	CGGA
CGGA_1273	-0.282515	IDHmut-non-codel	CGGA
CGGA_1275	3.18427	IDHwt	CGGA
CGGA_1280	-0.932366	IDHwt	CGGA
CGGA_1282	-0.301788	IDHwt	CGGA
CGGA_1283	-0.728295	IDHwt	CGGA
CGGA_1284	1.85093	IDHwt	CGGA
CGGA_1285	1.82336	IDHwt	CGGA
CGGA_1286	-1.01889	IDHmut-codel	CGGA
CGGA_1287	-0.635028	IDHmut-non-codel	CGGA
CGGA_1292	-0.920571	IDHwt	CGGA
CGGA_1295	0.165899	IDHmut-non-codel	CGGA
CGGA_1299	1.00688	IDHwt	CGGA
CGGA_1300	-0.107151	IDHmut-non-codel	CGGA
CGGA_1301	0.347905	IDHwt	CGGA
CGGA_1305	0.0795787	IDHmut-non-codel	CGGA
CGGA_1307	-0.0344131	IDHmut-non-codel	CGGA
CGGA_1311	-0.757981	IDHmut-codel	CGGA
CGGA_1313	1.77217	IDHwt	CGGA
CGGA_1314	0.905906	IDHmut-non-codel	CGGA
CGGA_1318	0.382134	IDHmut-non-codel	CGGA
CGGA_1319	-0.699429	IDHwt	CGGA
CGGA_1320	-0.34819	IDHwt	CGGA
CGGA_1321	-0.191155	IDHmut-non-codel	CGGA
CGGA_1322	-0.932366	IDHmut-non-codel	CGGA
CGGA_1324	-0.0858465	IDHmut-codel	CGGA
CGGA_1326	0.371982	IDHmut-non-codel	CGGA
CGGA_1329	0.0568351	IDHmut-non-codel	CGGA
CGGA_1330	0.566829	IDHmut-non-codel	CGGA
CGGA_1332	0.961488	IDHwt	CGGA
CGGA_1334	0.75244	IDHwt	CGGA
CGGA_1335	-1.18627	IDHmut-codel	CGGA
CGGA_1338	1.46174	IDHwt	CGGA
CGGA_1339	-0.980928	IDHmut-codel	CGGA
CGGA_1340	-1.423	IDHwt	CGGA
CGGA_1342	1.73874	IDHwt	CGGA
CGGA_1343	0.29436	IDHwt	CGGA
CGGA_1345	1.34401	IDHmut-codel	CGGA
CGGA_1346	2.03284	IDHwt	CGGA
CGGA_135	1.88819	IDHwt	CGGA
CGGA_1353	0.0382766	IDHwt	CGGA
CGGA_1354	1.1502	IDHwt	CGGA
CGGA_1356	-0.653027	IDHmut-non-codel	CGGA
CGGA_1359	1.76772	IDHwt	CGGA
CGGA_1361	-1.07176	IDHmut-non-codel	CGGA
CGGA_1362	-0.747991	IDHwt	CGGA
CGGA_1369	-0.509106	IDHmut-non-codel	CGGA
CGGA_1370	-0.440254	IDHwt	CGGA
CGGA_1371	0.541124	IDHwt	CGGA
CGGA_1374	1.2472	IDHmut-non-codel	CGGA
CGGA_1375	-1.18627	IDHmut-non-codel	CGGA
CGGA_1377	-0.689982	IDHmut-non-codel	CGGA
CGGA_1380	-0.162396	IDHwt	CGGA
CGGA_1381	0.153398	IDHmut-non-codel	CGGA
CGGA_1382	-0.321423	IDHwt	CGGA
CGGA_1383	-0.418276	IDHmut-codel	CGGA
CGGA_1384	0.398836	IDHmut-non-codel	CGGA
CGGA_1387	-0.0546834	IDHwt	CGGA
CGGA_1388	-0.282515	IDHmut-non-codel	CGGA
CGGA_1389	-0.944296	IDHmut-codel	CGGA
CGGA_139	-0.778251	IDHmut-non-codel	CGGA
CGGA_1390	2.30239	IDHmut-non-codel	CGGA
CGGA_1391	0.418533	IDHwt	CGGA
CGGA_1392	1.1057	IDHwt	CGGA
CGGA_1393	1.27619	IDHwt	CGGA
CGGA_1394	-0.432876	IDHmut-non-codel	CGGA
CGGA_1398	-0.798923	IDHmut-non-codel	CGGA
CGGA_1401	-0.582823	IDHmut-non-codel	CGGA
CGGA_1402	1.32917	IDHwt	CGGA
CGGA_1403	1.08701	IDHwt	CGGA
CGGA_1404	-0.245006	IDHmut-codel	CGGA
CGGA_1406	-0.245006	IDHmut-non-codel	CGGA
CGGA_1407	0.29436	IDHmut-codel	CGGA
CGGA_1408	-0.582823	IDHwt	CGGA
CGGA_1409	0.218408	IDHmut-non-codel	CGGA
CGGA_1410	-0.455167	IDHwt	CGGA
CGGA_1411	0.812107	IDHwt	CGGA
CGGA_1412	-0.173805	IDHmut-codel	CGGA
CGGA_1413	-0.418276	IDHmut-codel	CGGA
CGGA_1415	2.48591	IDHwt	CGGA
CGGA_1416	-0.662144	IDHmut-codel	CGGA
CGGA_1417	-1.2648	IDHmut-codel	CGGA
CGGA_1419	0.648212	IDHwt	CGGA
CGGA_1420	-0.403878	IDHwt	CGGA
CGGA_1426	1.21282	IDHwt	CGGA
CGGA_1429	-0.238884	IDHmut-codel	CGGA
CGGA_1430	-0.591345	IDHwt	CGGA
CGGA_1431	-1.09923	IDHmut-non-codel	CGGA
CGGA_1433	1.42891	IDHwt	CGGA
CGGA_1434	1.66653	IDHwt	CGGA
CGGA_1435	0.441052	IDHmut-non-codel	CGGA
CGGA_1437	-0.0294064	IDHwt	CGGA
CGGA_1440	-0.798923	IDHmut-codel	CGGA
CGGA_1441	0.629783	IDHwt	CGGA
CGGA_1443	1.77926	IDHwt	CGGA
CGGA_1444	0.149197	IDHwt	CGGA
CGGA_1450	-0.841536	IDHmut-codel	CGGA
CGGA_1451	2.28893	IDHwt	CGGA
CGGA_1452	1.67827	IDHwt	CGGA
CGGA_1454	-0.809414	IDHwt	CGGA
CGGA_1457	1.67632	IDHwt	CGGA
CGGA_1458	-1.04499	IDHmut-codel	CGGA
CGGA_1459	0.546891	IDHwt	CGGA
CGGA_1460	0.127936	IDHwt	CGGA
CGGA_1461	0.541124	IDHwt	CGGA
CGGA_1462	1.97809	IDHwt	CGGA
CGGA_1463	-0.968574	IDHmut-codel	CGGA
CGGA_1471	0.144979	IDHmut-non-codel	CGGA
CGGA_1475	0.787278	IDHmut-non-codel	CGGA
CGGA_1476	0.558331	IDHwt	CGGA
CGGA_1478	1.20978	IDHwt	CGGA
CGGA_1480	1.86648	IDHwt	CGGA
CGGA_1487	0.784991	IDHwt	CGGA
CGGA_1488	-1.15644	IDHmut-non-codel	CGGA
CGGA_1491	0.847199	IDHmut-non-codel	CGGA
CGGA_1492	1.38732	IDHwt	CGGA
CGGA_1496	-0.738096	IDHmut-codel	CGGA
CGGA_1497	-0.920571	IDHmut-non-codel	CGGA
CGGA_1500	0.214461	IDHwt	CGGA
CGGA_1502	-0.091132	IDHmut-codel	CGGA
CGGA_1504	-0.462704	IDHmut-non-codel	CGGA
CGGA_1505	0.943943	IDHmut-non-codel	CGGA
CGGA_1507	0.412008	IDHwt	CGGA
CGGA_1508	-0.208799	IDHmut-non-codel	CGGA
CGGA_1510	-0.738096	IDHmut-non-codel	CGGA
CGGA_1513	-1.00608	IDHmut-codel	CGGA
CGGA_1516	-0.718584	IDHmut-codel	CGGA
CGGA_1517	-0.747991	IDHmut-codel	CGGA
CGGA_1518	-0.238884	IDHwt	CGGA
CGGA_1520	0.305291	IDHwt	CGGA
CGGA_1521	0.508821	IDHwt	CGGA
CGGA_1523	-0.112546	IDHmut-non-codel	CGGA
CGGA_1524	-0.565986	IDHmut-codel	CGGA
CGGA_1526	-0.768066	IDHmut-codel	CGGA
CGGA_1527	-0.643989	IDHmut-non-codel	CGGA
CGGA_1528	-0.582823	IDHmut-codel	CGGA
CGGA_1529	-0.778251	IDHwt	CGGA
CGGA_1531	-1.17125	IDHmut-non-codel	CGGA
CGGA_1533	1.63151	IDHwt	CGGA
CGGA_1534	-0.591345	IDHmut-non-codel	CGGA
CGGA_1535	0.984431	IDHmut-non-codel	CGGA
CGGA_1536	-0.699429	IDHmut-non-codel	CGGA
CGGA_1537	-0.145513	IDHwt	CGGA
CGGA_1538	1.38604	IDHwt	CGGA
CGGA_1539	-0.980928	IDHmut-non-codel	CGGA
CGGA_1541	-0.245006	IDHwt	CGGA
CGGA_1543	0.658599	IDHmut-non-codel	CGGA
CGGA_1544	-0.728295	IDHmut-non-codel	CGGA
CGGA_1546	1.72022	IDHwt	CGGA
CGGA_1548	0.803146	IDHwt	CGGA
CGGA_1552	-0.68062	IDHmut-codel	CGGA
CGGA_1553	-0.582823	IDHmut-non-codel	CGGA
CGGA_1554	-0.064968	IDHmut-codel	CGGA
CGGA_1557	0.499835	IDHmut-codel	CGGA
CGGA_1558	-0.301788	IDHwt	CGGA
CGGA_1559	0.0146047	IDHmut-codel	CGGA
CGGA_1560	1.42395	IDHmut-non-codel	CGGA
CGGA_1562	-0.00472707	IDHmut-codel	CGGA
CGGA_1563	0.558331	IDHwt	CGGA
CGGA_1564	-0.0858465	IDHwt	CGGA
CGGA_1565	0.450556	IDHmut-non-codel	CGGA
CGGA_1566	-0.830718	IDHmut-codel	CGGA
CGGA_1567	0.405443	IDHmut-non-codel	CGGA
CGGA_1571	-0.944296	IDHmut-non-codel	CGGA
CGGA_1572	-0.238884	IDHwt	CGGA
CGGA_1575	0.645599	IDHmut-non-codel	CGGA
CGGA_1579	-0.798923	IDHwt	CGGA
CGGA_1580	-0.778251	IDHmut-non-codel	CGGA
CGGA_1586	2.07824	IDHwt	CGGA
CGGA_1587	-0.2889	IDHmut-non-codel	CGGA
CGGA_1588	0.853649	IDHwt	CGGA
CGGA_1589	-1.09923	IDHwt	CGGA
CGGA_1591	-0.214747	IDHmut-non-codel	CGGA
CGGA_1592	0.260864	IDHmut-codel	CGGA
CGGA_1596	-0.541228	IDHwt	CGGA
CGGA_1597	0.632435	IDHwt	CGGA
CGGA_1598	-0.301788	IDHwt	CGGA
CGGA_1601	1.01793	IDHwt	CGGA
CGGA_1603	1.55993	IDHwt	CGGA
CGGA_1604	0.831991	IDHmut-non-codel	CGGA
CGGA_1605	-0.361836	IDHwt	CGGA
CGGA_1606	-0.220729	IDHwt	CGGA
CGGA_1607	0.549763	IDHmut-codel	CGGA
CGGA_1608	-0.0394439	IDHmut-non-codel	CGGA
CGGA_1611	-0.820012	IDHmut-non-codel	CGGA
CGGA_1612	2.57037	IDHwt	CGGA
CGGA_1613	1.66849	IDHwt	CGGA
CGGA_1614	-0.738096	IDHmut-non-codel	CGGA
CGGA_1618	-1.29794	IDHmut-non-codel	CGGA
CGGA_1619	-0.389675	IDHmut-non-codel	CGGA
CGGA_1620	-0.944296	IDHmut-codel	CGGA
CGGA_1621	-1.04499	IDHmut-non-codel	CGGA
CGGA_1623	0.93009	IDHwt	CGGA
CGGA_1624	-0.162396	IDHmut-non-codel	CGGA
CGGA_1626	1.0853	IDHwt	CGGA
CGGA_1627	-0.643989	IDHmut-non-codel	CGGA
CGGA_1631	0.511799	IDHwt	CGGA
CGGA_1634	1.49705	IDHwt	CGGA
CGGA_1641	0.437865	IDHwt	CGGA
CGGA_1642	-1.07176	IDHmut-non-codel	CGGA
CGGA_1643	1.19442	IDHwt	CGGA
CGGA_1644	1.45934	IDHwt	CGGA
CGGA_1645	-1.03186	IDHmut-non-codel	CGGA
CGGA_1649	-0.269862	IDHmut-codel	CGGA
CGGA_1650	-0.932366	IDHmut-non-codel	CGGA
CGGA_1651	-0.968574	IDHmut-non-codel	CGGA
CGGA_1654	1.16143	IDHwt	CGGA
CGGA_1655	-0.809414	IDHmut-non-codel	CGGA
CGGA_1656	1.41773	IDHwt	CGGA
CGGA_1658	0.691661	IDHwt	CGGA
CGGA_1659	1.46294	IDHwt	CGGA
CGGA_1662	-0.617335	IDHmut-codel	CGGA
CGGA_1663	1.06624	IDHwt	CGGA
CGGA_1664	-1.0854	IDHmut-non-codel	CGGA
CGGA_1667	-0.778251	IDHmut-codel	CGGA
CGGA_1669	-0.432876	IDHwt	CGGA
CGGA_1670	-0.361836	IDHwt	CGGA
CGGA_1671	0.0429473	IDHmut-non-codel	CGGA
CGGA_1673	-1.2648	IDHmut-non-codel	CGGA
CGGA_1675	0.0146047	IDHmut-non-codel	CGGA
CGGA_1679	-1.15644	IDHmut-codel	CGGA
CGGA_1680	-0.128899	IDHmut-non-codel	CGGA
CGGA_1682	-0.0495788	IDHwt	CGGA
CGGA_1684	0.31969	IDHwt	CGGA
CGGA_1685	0.580841	IDHmut-non-codel	CGGA
CGGA_1686	-1.21698	IDHwt	CGGA
CGGA_1687	2.90708	IDHwt	CGGA
CGGA_1688	0.312515	IDHwt	CGGA
CGGA_1689	-0.747991	IDHmut-non-codel	CGGA
CGGA_1690	1.47719	IDHwt	CGGA
CGGA_1694	0.365159	IDHwt	CGGA
CGGA_1695	-0.809414	IDHmut-non-codel	CGGA
CGGA_1697	-0.173805	IDHwt	CGGA
CGGA_1698	2.34844	IDHwt	CGGA
CGGA_1700	-0.156738	IDHmut-codel	CGGA
CGGA_1701	-1.01889	IDHmut-codel	CGGA
CGGA_1702	-0.852467	IDHwt	CGGA
CGGA_1703	-0.841536	IDHmut-non-codel	CGGA
CGGA_1704	-0.314837	IDHwt	CGGA
CGGA_1706	2.59491	IDHwt	CGGA
CGGA_1708	1.64666	IDHwt	CGGA
CGGA_1709	0.569647	IDHwt	CGGA
CGGA_171	-0.591345	IDHmut-codel	CGGA
CGGA_1713	-0.396752	IDHwt	CGGA
CGGA_1715	-0.00961648	IDHwt	CGGA
CGGA_1716	0.194501	IDHmut-non-codel	CGGA
CGGA_1718	-0.662144	IDHmut-non-codel	CGGA
CGGA_1720	-0.852467	IDHmut-non-codel	CGGA
CGGA_1723	-1.15644	IDHmut-codel	CGGA
CGGA_1725	-0.238884	IDHmut-codel	CGGA
CGGA_1727	-0.591345	IDHmut-non-codel	CGGA
CGGA_1728	-0.112546	IDHmut-non-codel	CGGA
CGGA_1729	0.771165	IDHwt	CGGA
CGGA_1731	-0.0858465	IDHmut-non-codel	CGGA
CGGA_1735	-1.29794	IDHwt	CGGA
CGGA_1736	1.77838	IDHwt	CGGA
CGGA_1737	-0.662144	IDHmut-codel	CGGA
CGGA_1738	-0.32805	IDHwt	CGGA
CGGA_1739	0.0475971	IDHmut-non-codel	CGGA
CGGA_1740	-0.778251	IDHwt	CGGA
CGGA_1743	-0.738096	IDHmut-non-codel	CGGA
CGGA_1749	0.750075	IDHwt	CGGA
CGGA_1750	-0.314837	IDHwt	CGGA
CGGA_1758	0.249455	IDHwt	CGGA
CGGA_1760	1.06973	IDHwt	CGGA
CGGA_1764	-0.541228	IDHmut-non-codel	CGGA
CGGA_1769	-0.920571	IDHwt	CGGA
CGGA_1770	-0.059813	IDHmut-non-codel	CGGA
CGGA_1771	-0.699429	IDHmut-non-codel	CGGA
CGGA_1773	2.36571	IDHwt	CGGA
CGGA_1776	1.05746	IDHwt	CGGA
CGGA_1785	-0.411052	IDHmut-non-codel	CGGA
CGGA_1786	-0.863513	IDHmut-codel	CGGA
CGGA_1807	-0.0394439	IDHwt	CGGA
CGGA_1809	-0.956365	IDHwt	CGGA
CGGA_1811	1.22039	IDHwt	CGGA
CGGA_1812	2.25589	IDHwt	CGGA
CGGA_1814	0.940004	IDHwt	CGGA
CGGA_1815	1.39628	IDHwt	CGGA
CGGA_1817	0.165899	IDHwt	CGGA
CGGA_1819	1.96264	IDHwt	CGGA
CGGA_1820	0.523628	IDHwt	CGGA
CGGA_1826	-0.354991	IDHwt	CGGA
CGGA_1829	-0.27617	IDHwt	CGGA
CGGA_1833	1.15503	IDHwt	CGGA
CGGA_1840	-0.582823	IDHwt	CGGA
CGGA_1850	-0.738096	IDHmut-non-codel	CGGA
CGGA_1854	-0.314837	IDHmut-non-codel	CGGA
CGGA_1857	0.283314	IDHwt	CGGA
CGGA_1862	1.23537	IDHwt	CGGA
CGGA_1863	-1.12745	IDHmut-codel	CGGA
CGGA_1865	0.71884	IDHwt	CGGA
CGGA_1866	1.01242	IDHwt	CGGA
CGGA_1870	-0.852467	IDHmut-codel	CGGA
CGGA_1875	2.33505	IDHwt	CGGA
CGGA_1877	-0.788535	IDHmut-codel	CGGA
CGGA_1880	-0.525044	IDHmut-non-codel	CGGA
CGGA_1882	-0.440254	IDHmut-codel	CGGA
CGGA_1886	0.0288722	IDHwt	CGGA
CGGA_1899	0.402145	IDHwt	CGGA
CGGA_1901	1.33864	IDHwt	CGGA
CGGA_1902	0.241779	IDHmut-non-codel	CGGA
CGGA_1906	0.132223	IDHmut-non-codel	CGGA
CGGA_1908	1.05393	IDHwt	CGGA
CGGA_1911	2.0568	IDHwt	CGGA
CGGA_1916	0.30891	IDHmut-non-codel	CGGA
CGGA_194	-0.980928	IDHmut-codel	CGGA
CGGA_1946	2.04797	IDHwt	CGGA
CGGA_1953	0.800894	IDHwt	CGGA
CGGA_1972	1.48775	IDHwt	CGGA
CGGA_1976	1.55556	IDHwt	CGGA
CGGA_1985	0.0568351	IDHmut-non-codel	CGGA
CGGA_1994	-0.809414	IDHmut-non-codel	CGGA
CGGA_2002	-0.944296	IDHmut-non-codel	CGGA
CGGA_2003	-0.197003	IDHmut-non-codel	CGGA
CGGA_2006	-0.220729	IDHmut-non-codel	CGGA
CGGA_2008	0.684124	IDHwt	CGGA
CGGA_2013	0.132223	IDHmut-codel	CGGA
CGGA_2024	-0.968574	IDHwt	CGGA
CGGA_2038	0.549763	IDHmut-non-codel	CGGA
CGGA_2039	-0.32805	IDHwt	CGGA
CGGA_2046	0.323259	IDHmut-non-codel	CGGA
CGGA_2047	-0.0145289	IDHwt	CGGA
CGGA_2056	3.67079	IDHmut-non-codel	CGGA
CGGA_2062	1.1502	IDHmut-non-codel	CGGA
CGGA_2075	3.42138	IDHwt	CGGA
CGGA_2078	1.55884	IDHwt	CGGA
CGGA_2079	-0.626144	IDHmut-codel	CGGA
CGGA_2081	-1.21698	IDHmut-codel	CGGA
CGGA_2082	1.91101	IDHwt	CGGA
CGGA_2088	2.21598	IDHwt	CGGA
CGGA_2106	-0.0805876	IDHmut-codel	CGGA
CGGA_2115	-0.128899	IDHwt	CGGA
CGGA_2121	1.1678	IDHmut-non-codel	CGGA
CGGA_2129	-0.708963	IDHmut-non-codel	CGGA
CGGA_235	-1.33217	IDHmut-codel	CGGA
CGGA_236	-0.375663	IDHmut-codel	CGGA
CGGA_241	0.418533	IDHmut-non-codel	CGGA
CGGA_243	-1.04499	IDHmut-codel	CGGA
CGGA_245	0.405443	IDHmut-non-codel	CGGA
CGGA_247	-0.354991	IDHmut-non-codel	CGGA
CGGA_251	0.368576	IDHmut-non-codel	CGGA
CGGA_252	-0.626144	IDHmut-non-codel	CGGA
CGGA_254	-1.09923	IDHmut-codel	CGGA
CGGA_256	0.412008	IDHmut-non-codel	CGGA
CGGA_261	-0.708963	IDHmut-non-codel	CGGA
CGGA_265	0.541124	IDHmut-non-codel	CGGA
CGGA_267	-0.852467	IDHmut-non-codel	CGGA
CGGA_269	1.05216	IDHwt	CGGA
CGGA_272	1.25306	IDHwt	CGGA
CGGA_273	0.253272	IDHmut-non-codel	CGGA
CGGA_274	0.691661	IDHwt	CGGA
CGGA_276	-0.738096	IDHmut-non-codel	CGGA
CGGA_279	0.764182	IDHmut-non-codel	CGGA
CGGA_28	-0.191155	IDHmut-codel	CGGA
CGGA_283	-0.863513	IDHmut-codel	CGGA
CGGA_288	0.807636	IDHmut-codel	CGGA
CGGA_290	-1.09923	IDHmut-codel	CGGA
CGGA_300	-0.440254	IDHmut-non-codel	CGGA
CGGA_314	-0.968574	IDHmut-codel	CGGA
CGGA_318	3.04872	IDHwt	CGGA
CGGA_320	-1.2648	IDHmut-codel	CGGA
CGGA_323	-0.462704	IDHwt	CGGA
CGGA_330	0.766515	IDHwt	CGGA
CGGA_333	0.132223	IDHmut-non-codel	CGGA
CGGA_336	0.874867	IDHmut-codel	CGGA
CGGA_337	-0.368727	IDHmut-non-codel	CGGA
CGGA_358	0.347905	IDHmut-non-codel	CGGA
CGGA_362	2.37373	IDHmut-codel	CGGA
CGGA_369	-0.485647	IDHmut-non-codel	CGGA
CGGA_374	-0.245006	IDHmut-non-codel	CGGA
CGGA_400	0.466207	IDHmut-non-codel	CGGA
CGGA_406	-0.208799	IDHmut-non-codel	CGGA
CGGA_413	-0.0294064	IDHwt	CGGA
CGGA_42	-0.0753551	IDHmut-codel	CGGA
CGGA_420	-1.20151	IDHmut-codel	CGGA
CGGA_426	2.17689	IDHwt	CGGA
CGGA_431	-0.920571	IDHmut-codel	CGGA
CGGA_446	-1.14184	IDHmut-codel	CGGA
CGGA_448	1.76055	IDHwt	CGGA
CGGA_457	1.22641	IDHmut-non-codel	CGGA
CGGA_458	-0.757981	IDHmut-non-codel	CGGA
CGGA_474	-0.282515	IDHwt	CGGA
CGGA_479	-0.747991	IDHmut-codel	CGGA
CGGA_482	-0.525044	IDHmut-codel	CGGA
CGGA_483	3.49271	IDHwt	CGGA
CGGA_485	-0.557668	IDHmut-codel	CGGA
CGGA_487	0.230159	IDHwt	CGGA
CGGA_488	0.241779	IDHwt	CGGA
CGGA_490	-0.956365	IDHmut-codel	CGGA
CGGA_491	-0.27617	IDHmut-non-codel	CGGA
CGGA_492	0.2105	IDHwt	CGGA
CGGA_493	-0.747991	IDHmut-non-codel	CGGA
CGGA_494	0.398836	IDHwt	CGGA
CGGA_499	0.771165	IDHwt	CGGA
CGGA_501	-0.956365	IDHmut-codel	CGGA
CGGA_502	-0.932366	IDHmut-non-codel	CGGA
CGGA_503	-0.107151	IDHmut-non-codel	CGGA
CGGA_507	-0.708963	IDHmut-non-codel	CGGA
CGGA_509	0.395517	IDHwt	CGGA
CGGA_510	-0.34819	IDHmut-codel	CGGA
CGGA_521	-0.689982	IDHwt	CGGA
CGGA_525	1.04861	IDHwt	CGGA
CGGA_530	0.478561	IDHwt	CGGA
CGGA_538	-0.757981	IDHmut-codel	CGGA
CGGA_541	-0.689982	IDHwt	CGGA
CGGA_543	-1.11324	IDHmut-codel	CGGA
CGGA_545	-0.0344131	IDHmut-non-codel	CGGA
CGGA_551	-1.18627	IDHmut-codel	CGGA
CGGA_560	0.241779	IDHmut-non-codel	CGGA
CGGA_564	-0.145513	IDHwt	CGGA
CGGA_565	-0.2889	IDHwt	CGGA
CGGA_568	1.22491	IDHwt	CGGA
CGGA_578	-0.361836	IDHwt	CGGA
CGGA_580	-0.617335	IDHmut-non-codel	CGGA
CGGA_591	-0.455167	IDHmut-non-codel	CGGA
CGGA_598	-0.956365	IDHmut-codel	CGGA
CGGA_599	-0.956365	IDHwt	CGGA
CGGA_601	-0.0244236	IDHmut-non-codel	CGGA
CGGA_603	-0.768066	IDHmut-non-codel	CGGA
CGGA_604	2.04865	IDHwt	CGGA
CGGA_605	0.895662	IDHmut-non-codel	CGGA
CGGA_607	-0.549416	IDHmut-non-codel	CGGA
CGGA_616	0.650819	IDHwt	CGGA
CGGA_619	-0.282515	IDHwt	CGGA
CGGA_621	-0.341434	IDHmut-non-codel	CGGA
CGGA_624	1.05216	IDHwt	CGGA
CGGA_625	-1.04499	IDHmut-codel	CGGA
CGGA_630	-0.885964	IDHmut-codel	CGGA
CGGA_632	0.194501	IDHmut-non-codel	CGGA
CGGA_633	-0.68062	IDHwt	CGGA
CGGA_634	-0.565986	IDHmut-non-codel	CGGA
CGGA_635	-1.36756	IDHmut-codel	CGGA
CGGA_638	-0.932366	IDHmut-codel	CGGA
CGGA_641	-0.820012	IDHmut-codel	CGGA
CGGA_642	-0.27617	IDHmut-non-codel	CGGA
CGGA_643	-0.455167	IDHwt	CGGA
CGGA_652	-0.485647	IDHmut-non-codel	CGGA
CGGA_655	-0.557668	IDHmut-codel	CGGA
CGGA_658	0.0288722	IDHwt	CGGA
CGGA_659	-0.699429	IDHwt	CGGA
CGGA_661	1.21282	IDHwt	CGGA
CGGA_662	-0.788535	IDHmut-codel	CGGA
CGGA_663	-1.17125	IDHmut-non-codel	CGGA
CGGA_666	-1.40419	IDHmut-codel	CGGA
CGGA_671	-1.24861	IDHmut-codel	CGGA
CGGA_675	-1.52249	IDHmut-codel	CGGA
CGGA_676	0.899772	IDHwt	CGGA
CGGA_678	1.09044	IDHwt	CGGA
CGGA_679	0.0795787	IDHwt	CGGA
CGGA_680	-1.01889	IDHwt	CGGA
CGGA_685	-0.440254	IDHmut-non-codel	CGGA
CGGA_689	-0.00472707	IDHmut-codel	CGGA
CGGA_694	-0.485647	IDHmut-non-codel	CGGA
CGGA_698	-0.403878	IDHmut-non-codel	CGGA
CGGA_700	-0.908907	IDHmut-non-codel	CGGA
CGGA_703	1.70231	IDHmut-non-codel	CGGA
CGGA_704	-0.980928	IDHmut-non-codel	CGGA
CGGA_705	-0.462704	IDHmut-non-codel	CGGA
CGGA_707	-1.09923	IDHmut-codel	CGGA
CGGA_710	0.033585	IDHmut-non-codel	CGGA
CGGA_715	-0.897372	IDHmut-codel	CGGA
CGGA_720	-0.920571	IDHmut-non-codel	CGGA
CGGA_721	-0.269862	IDHmut-non-codel	CGGA
CGGA_724	-0.830718	IDHmut-non-codel	CGGA
CGGA_725	-1.14184	IDHmut-codel	CGGA
CGGA_727	-0.565986	IDHwt	CGGA
CGGA_730	-0.885964	IDHmut-codel	CGGA
CGGA_731	0.825405	IDHwt	CGGA
CGGA_732	0.245624	IDHwt	CGGA
CGGA_738	0.961488	IDHmut-non-codel	CGGA
CGGA_747	-0.968574	IDHmut-non-codel	CGGA
CGGA_752	-1.03186	IDHmut-codel	CGGA
CGGA_757	0.30166	IDHmut-non-codel	CGGA
CGGA_759	0.523628	IDHmut-non-codel	CGGA
CGGA_760	-0.0805876	IDHmut-codel	CGGA
CGGA_761	0.93605	IDHmut-non-codel	CGGA
CGGA_762	-1.52249	IDHmut-codel	CGGA
CGGA_763	-0.820012	IDHwt	CGGA
CGGA_766	-0.68062	IDHmut-codel	CGGA
CGGA_773	-0.208799	IDHmut-non-codel	CGGA
CGGA_777	1.81827	IDHwt	CGGA
CGGA_780	-0.549416	IDHwt	CGGA
CGGA_782	-0.179556	IDHwt	CGGA
CGGA_785	0.30166	IDHmut-codel	CGGA
CGGA_789	1.07841	IDHwt	CGGA
CGGA_791	-0.382645	IDHwt	CGGA
CGGA_796	-0.168085	IDHwt	CGGA
CGGA_799	-0.728295	IDHmut-codel	CGGA
CGGA_802	1.93563	IDHwt	CGGA
CGGA_804	-0.863513	IDHwt	CGGA
CGGA_807	-1.09923	IDHwt	CGGA
CGGA_808	-0.396752	IDHwt	CGGA
CGGA_809	-0.591345	IDHmut-non-codel	CGGA
CGGA_810	3.41366	IDHwt	CGGA
CGGA_812	-0.059813	IDHmut-codel	CGGA
CGGA_815	-0.809414	IDHmut-non-codel	CGGA
CGGA_818	1.08014	IDHmut-non-codel	CGGA
CGGA_822	-0.778251	IDHmut-non-codel	CGGA
CGGA_825	0.0382766	IDHmut-non-codel	CGGA
CGGA_831	0.663754	IDHwt	CGGA
CGGA_834	0.218408	IDHwt	CGGA
CGGA_835	-0.757981	IDHmut-codel	CGGA
CGGA_837	1.10738	IDHwt	CGGA
CGGA_838	-0.485647	IDHmut-codel	CGGA
CGGA_842	2.71651	IDHwt	CGGA
CGGA_843	-1.15644	IDHmut-codel	CGGA
CGGA_846	-0.282515	IDHwt	CGGA
CGGA_848	0.428243	IDHwt	CGGA
CGGA_850	0.4938	IDHwt	CGGA
CGGA_852	-0.238884	IDHwt	CGGA
CGGA_856	-1.20151	IDHmut-codel	CGGA
CGGA_858	-1.20151	IDHmut-codel	CGGA
CGGA_859	2.42254	IDHwt	CGGA
CGGA_861	0.365159	IDHwt	CGGA
CGGA_862	-1.00608	IDHmut-non-codel	CGGA
CGGA_863	-1.18627	IDHwt	CGGA
CGGA_864	-0.191155	IDHmut-codel	CGGA
CGGA_867	0.245624	IDHmut-non-codel	CGGA
CGGA_869	2.25477	IDHwt	CGGA
CGGA_871	-0.541228	IDHmut-codel	CGGA
CGGA_876	2.05341	IDHwt	CGGA
CGGA_878	1.22641	IDHwt	CGGA
CGGA_881	1.28332	IDHwt	CGGA
CGGA_882	-0.197003	IDHmut-non-codel	CGGA
CGGA_883	-1.09923	IDHmut-non-codel	CGGA
CGGA_884	-0.738096	IDHmut-non-codel	CGGA
CGGA_887	-0.112546	IDHwt	CGGA
CGGA_888	-0.757981	IDHmut-codel	CGGA
CGGA_889	-0.68062	IDHmut-non-codel	CGGA
CGGA_890	-1.04499	IDHmut-non-codel	CGGA
CGGA_892	-0.574371	IDHmut-codel	CGGA
CGGA_893	-0.908907	IDHmut-non-codel	CGGA
CGGA_898	-0.830718	IDHmut-non-codel	CGGA
CGGA_899	-0.301788	IDHmut-non-codel	CGGA
CGGA_901	0.182339	IDHmut-non-codel	CGGA
CGGA_902	0.818777	IDHwt	CGGA
CGGA_903	0.66118	IDHmut-non-codel	CGGA
CGGA_904	-0.653027	IDHmut-non-codel	CGGA
CGGA_905	-0.699429	IDHmut-non-codel	CGGA
CGGA_908	-0.920571	IDHmut-non-codel	CGGA
CGGA_909	-0.470296	IDHmut-non-codel	CGGA
CGGA_D02	0.0522264	IDHwt	CGGA
CGGA_D03	1.55227	IDHwt	CGGA
CGGA_D04	-0.485647	IDHmut-non-codel	CGGA
CGGA_D07	-0.208799	IDHmut-codel	CGGA
CGGA_D09	0.361731	IDHwt	CGGA
CGGA_D11	0.782699	IDHwt	CGGA
CGGA_D14	-1.01889	IDHmut-non-codel	CGGA
CGGA_D15	-1.20151	IDHmut-codel	CGGA
CGGA_D16	0.648212	IDHwt	CGGA
CGGA_D18	-0.980928	IDHwt	CGGA
CGGA_D19	-0.617335	IDHmut-codel	CGGA
CGGA_D20	-0.99343	IDHmut-non-codel	CGGA
CGGA_D21	0.463096	IDHmut-non-codel	CGGA
CGGA_D24	-0.798923	IDHmut-non-codel	CGGA
CGGA_D26	3.0958	IDHwt	CGGA
CGGA_D27	1.05038	IDHmut-codel	CGGA
CGGA_D28	-0.830718	IDHmut-non-codel	CGGA
CGGA_D29	-1.423	IDHmut-codel	CGGA
CGGA_D30	0.514769	IDHwt	CGGA
CGGA_D32	0.818777	IDHwt	CGGA
CGGA_D33	1.29321	IDHmut-non-codel	CGGA
CGGA_D34	-0.197003	IDHmut-non-codel	CGGA
CGGA_D35	2.21073	IDHwt	CGGA
CGGA_D36	2.471	IDHwt	CGGA
CGGA_D37	0.249455	IDHwt	CGGA
CGGA_D38	-0.565986	IDHmut-codel	CGGA
CGGA_D39	-0.574371	IDHmut-non-codel	CGGA
CGGA_D40	-0.091132	IDHmut-non-codel	CGGA
CGGA_D44	0.202531	IDHwt	CGGA
CGGA_D45	-0.173805	IDHmut-non-codel	CGGA
CGGA_D46	-0.0858465	IDHmut-non-codel	CGGA
CGGA_D47	-0.334721	IDHmut-codel	CGGA
CGGA_D48	-0.718584	IDHmut-non-codel	CGGA
CGGA_D49	-0.874678	IDHmut-codel	CGGA
CGGA_D50	-0.308292	IDHmut-codel	CGGA
CGGA_D51	1.79765	IDHwt	CGGA
CGGA_D52	0.42178	IDHmut-codel	CGGA
CGGA_D53	1.35997	IDHwt	CGGA
CGGA_D56	0.358292	IDHmut-non-codel	CGGA
CGGA_D57	0.29436	IDHwt	CGGA
CGGA_D59	-0.447683	IDHmut-non-codel	CGGA
CGGA_J023	-0.841536	IDHmut-non-codel	CGGA
CGGA_J024	-0.269862	IDHmut-non-codel	CGGA
CGGA_J030	-1.11324	IDHmut-codel	CGGA
CGGA_J042	0.961488	IDHmut-non-codel	CGGA
CGGA_J100	-0.747991	IDHmut-non-codel	CGGA
CGGA_J130	-0.447683	IDHwt	CGGA
CGGA_P100	0.648212	IDHwt	CGGA
CGGA_P102	1.10402	IDHmut-non-codel	CGGA
CGGA_P103	-1.34971	IDHmut-codel	CGGA
CGGA_P106	2.00048	IDHwt	CGGA
CGGA_P107	-0.134408	IDHmut-non-codel	CGGA
CGGA_P108	-0.582823	IDHwt	CGGA
CGGA_P109	-0.0964444	IDHmut-non-codel	CGGA
CGGA_P11	1.20059	IDHmut-non-codel	CGGA
CGGA_P110	-0.0701486	IDHwt	CGGA
CGGA_P111	-0.944296	IDHmut-codel	CGGA
CGGA_P112	-0.643989	IDHwt	CGGA
CGGA_P113	-1.03186	IDHwt	CGGA
CGGA_P114	-1.12745	IDHmut-codel	CGGA
CGGA_P121	-1.18627	IDHwt	CGGA
CGGA_P122	-0.2889	IDHmut-codel	CGGA
CGGA_P128	-1.01889	IDHmut-non-codel	CGGA
CGGA_P13	-1.24861	IDHmut-codel	CGGA
CGGA_P131	-1.12745	IDHmut-codel	CGGA
CGGA_P132	-0.885964	IDHmut-codel	CGGA
CGGA_P137	-0.968574	IDHmut-non-codel	CGGA
CGGA_P142	-1.0854	IDHmut-codel	CGGA
CGGA_P143	1.38604	IDHwt	CGGA
CGGA_P144	-1.00608	IDHmut-non-codel	CGGA
CGGA_P145	-0.830718	IDHmut-non-codel	CGGA
CGGA_P146	-1.12745	IDHmut-non-codel	CGGA
CGGA_P147	0.29436	IDHmut-non-codel	CGGA
CGGA_P150	-1.28124	IDHmut-non-codel	CGGA
CGGA_P151	-0.778251	IDHmut-non-codel	CGGA
CGGA_P155	-0.107151	IDHwt	CGGA
CGGA_P156	-1.38571	IDHmut-codel	CGGA
CGGA_P157	-0.0753551	IDHwt	CGGA
CGGA_P159	-0.447683	IDHwt	CGGA
CGGA_P16	-0.134408	IDHmut-codel	CGGA
CGGA_P160	1.39883	IDHwt	CGGA
CGGA_P163	-0.897372	IDHmut-non-codel	CGGA
CGGA_P17	-1.44215	IDHmut-codel	CGGA
CGGA_P173	-1.03186	IDHmut-non-codel	CGGA
CGGA_P174	-0.091132	IDHmut-codel	CGGA
CGGA_P176	-1.2648	IDHmut-codel	CGGA
CGGA_P177	-0.708963	IDHwt	CGGA
CGGA_P179	-1.38571	IDHmut-non-codel	CGGA
CGGA_P18	-0.778251	IDHmut-non-codel	CGGA
CGGA_P181	-0.830718	IDHwt	CGGA
CGGA_P182	1.8037	IDHwt	CGGA
CGGA_P183	-1.2648	IDHmut-codel	CGGA
CGGA_P185	-0.617335	IDHmut-non-codel	CGGA
CGGA_P19	-0.841536	IDHmut-non-codel	CGGA
CGGA_P199	1.18822	IDHwt	CGGA
CGGA_P20	-1.07176	IDHmut-non-codel	CGGA
CGGA_P21	-0.477943	IDHmut-non-codel	CGGA
CGGA_P22	-0.920571	IDHwt	CGGA
CGGA_P27	-1.00608	IDHmut-non-codel	CGGA
CGGA_P270	-1.12745	IDHmut-non-codel	CGGA
CGGA_P279	-1.40419	IDHmut-codel	CGGA
CGGA_P28	0.805393	IDHwt	CGGA
CGGA_P280	-0.68062	IDHwt	CGGA
CGGA_P283	-0.0294064	IDHwt	CGGA
CGGA_P286	-0.980928	IDHmut-codel	CGGA
CGGA_P295	-0.455167	IDHwt	CGGA
CGGA_P298	-0.671341	IDHmut-codel	CGGA
CGGA_P30	-0.139946	IDHwt	CGGA
CGGA_P306	-0.885964	IDHmut-codel	CGGA
CGGA_P308	-0.718584	IDHmut-non-codel	CGGA
CGGA_P31	1.56644	IDHwt	CGGA
CGGA_P311	0.459975	IDHmut-non-codel	CGGA
CGGA_P314	-0.418276	IDHmut-codel	CGGA
CGGA_P315	-0.757981	IDHmut-non-codel	CGGA
CGGA_P319	-0.525044	IDHmut-non-codel	CGGA
CGGA_P326	-0.557668	IDHmut-non-codel	CGGA
CGGA_P328	0.784991	IDHmut-non-codel	CGGA
CGGA_P335	-0.0294064	IDHmut-codel	CGGA
CGGA_P337	-0.179556	IDHmut-codel	CGGA
CGGA_P338	1.33052	IDHwt	CGGA
CGGA_P346	0.709039	IDHmut-non-codel	CGGA
CGGA_P356	-1.04499	IDHmut-non-codel	CGGA
CGGA_P358	0.361731	IDHmut-non-codel	CGGA
CGGA_P364	1.15823	IDHmut-non-codel	CGGA
CGGA_P385	-0.064968	IDHwt	CGGA
CGGA_P388	-0.179556	IDHmut-non-codel	CGGA
CGGA_P392	-0.382645	IDHmut-codel	CGGA
CGGA_P399	-0.134408	IDHmut-codel	CGGA
CGGA_P401	0.905906	IDHmut-non-codel	CGGA
CGGA_P411	1.1421	IDHmut-non-codel	CGGA
CGGA_P415	1.98826	IDHwt	CGGA
CGGA_P416	-0.269862	IDHmut-codel	CGGA
CGGA_P421	1.56319	IDHmut-non-codel	CGGA
CGGA_P422	-1.0854	IDHmut-codel	CGGA
CGGA_P437	-1.00608	IDHmut-codel	CGGA
CGGA_P438	0.0974233	IDHmut-codel	CGGA
CGGA_P439	1.84348	IDHmut-non-codel	CGGA
CGGA_P446	-0.956365	IDHmut-codel	CGGA
CGGA_P461	0.00498357	IDHmut-non-codel	CGGA
CGGA_P468	-0.778251	IDHmut-codel	CGGA
CGGA_P483	-0.0805876	IDHwt	CGGA
CGGA_P492	-0.501228	IDHmut-codel	CGGA
CGGA_P499	0.920082	IDHwt	CGGA
CGGA_P5	0.33036	IDHmut-non-codel	CGGA
CGGA_P500	-0.908907	IDHmut-codel	CGGA
CGGA_P501	-0.747991	IDHmut-non-codel	CGGA
CGGA_P505	-1.18627	IDHmut-non-codel	CGGA
CGGA_P508	-1.0854	IDHmut-non-codel	CGGA
CGGA_P510	0.918068	IDHmut-non-codel	CGGA
CGGA_P512	0.499835	IDHwt	CGGA
CGGA_P520	-0.549416	IDHmut-codel	CGGA
CGGA_P568	0.0795787	IDHmut-codel	CGGA
CGGA_P585	1.90398	IDHwt	CGGA
CGGA_P594	1.37439	IDHwt	CGGA
CGGA_P596	-0.635028	IDHmut-codel	CGGA
CGGA_P604	-0.139946	IDHwt	CGGA
CGGA_P609	0.140744	IDHwt	CGGA
CGGA_P615	-1.15644	IDHmut-codel	CGGA
CGGA_P619	0.704103	IDHwt	CGGA
CGGA_P623	0.157582	IDHmut-non-codel	CGGA
CGGA_P625	0.637721	IDHmut-non-codel	CGGA
CGGA_P633	-0.533105	IDHmut-non-codel	CGGA
CGGA_P7	2.12494	IDHwt	CGGA
CGGA_P83	-1.03186	IDHmut-non-codel	CGGA
CGGA_P84	-1.0854	IDHmut-non-codel	CGGA
CGGA_P86	-1.52249	IDHmut-codel	CGGA
CGGA_P87	0.268401	IDHmut-non-codel	CGGA
CGGA_P89	0.74295	IDHwt	CGGA
CGGA_P93	-0.509106	IDHmut-non-codel	CGGA
CGGA_P98	-0.820012	IDHmut-non-codel	CGGA
CGGA_P99	-0.440254	IDHmut-non-codel	CGGA

## Sheet:  Figure_1F
# Source Data Figure_1F
Sample	survival_months	vital_status	cutoff_group	Dataset
TCGA-02-0055	2.5	1	high	TCGA
TCGA-02-2486	20.3	1	high	TCGA
TCGA-06-0130	13	1	high	TCGA
TCGA-06-0141	10.3	1	high	TCGA
TCGA-06-0157	3.2	1	low	TCGA
TCGA-06-0168	19.7	1	low	TCGA
TCGA-06-0187	27.2	1	high	TCGA
TCGA-06-0190	10.4	1	high	TCGA
TCGA-06-0210	7.4	1	high	TCGA
TCGA-06-0238	13.3	1	low	TCGA
TCGA-06-0644	12.6	1	high	TCGA
TCGA-06-0645	5.8	1	high	TCGA
TCGA-06-0745	7.9	1	high	TCGA
TCGA-06-0747	2.7	1	high	TCGA
TCGA-06-0749	2.7	1	low	TCGA
TCGA-06-0750	0.9	1	high	TCGA
TCGA-06-0878	7.2	0	high	TCGA
TCGA-06-0882	20.8	1	high	TCGA
TCGA-06-1804	13.6	1	low	TCGA
TCGA-06-2557	1.1	1	low	TCGA
TCGA-06-2561	17.7	1	high	TCGA
TCGA-06-2562	12.6	1	high	TCGA
TCGA-06-2569	0.4	0	low	TCGA
TCGA-06-5408	11.7	1	high	TCGA
TCGA-06-5410	3.6	1	high	TCGA
TCGA-06-5412	4.5	1	high	TCGA
TCGA-06-5414	9	0	high	TCGA
TCGA-06-5418	2.7	1	high	TCGA
TCGA-06-5856	3.7	1	low	TCGA
TCGA-06-5859	4.6	0	low	TCGA
TCGA-08-0386	18	1	high	TCGA
TCGA-12-0619	34.9	1	high	TCGA
TCGA-12-3650	10.9	1	low	TCGA
TCGA-12-3652	34.9	1	high	TCGA
TCGA-12-3653	14.5	1	low	TCGA
TCGA-12-5299	3.2	1	high	TCGA
TCGA-14-0781	1	1	high	TCGA
TCGA-14-0787	2.2	1	high	TCGA
TCGA-14-0789	11.2	1	high	TCGA
TCGA-14-0790	13.8	1	low	TCGA
TCGA-14-0817	5.4	1	low	TCGA
TCGA-14-1825	7.6	1	low	TCGA
TCGA-15-0742	13.8	1	high	TCGA
TCGA-16-1045	29	1	low	TCGA
TCGA-19-1390	25.4	1	low	TCGA
TCGA-19-2619	9.7	0	high	TCGA
TCGA-19-2620	4.9	1	high	TCGA
TCGA-19-2624	0.2	1	high	TCGA
TCGA-19-2625	4.1	1	high	TCGA
TCGA-19-5960	15	1	low	TCGA
TCGA-26-5132	9.4	0	high	TCGA
TCGA-26-5133	14.9	0	low	TCGA
TCGA-26-5134	5.5	0	low	TCGA
TCGA-26-5135	8.9	1	high	TCGA
TCGA-26-5136	19	1	high	TCGA
TCGA-26-5139	1.6	0	high	TCGA
TCGA-27-1831	16.6	1	high	TCGA
TCGA-27-1832	9.9	1	high	TCGA
TCGA-27-2519	18.1	1	high	TCGA
TCGA-27-2524	7.6	1	high	TCGA
TCGA-27-2526	2.9	1	high	TCGA
TCGA-27-2528	15.8	1	high	TCGA
TCGA-28-2509	4.8	0	high	TCGA
TCGA-28-2513	7.3	0	high	TCGA
TCGA-28-2514	5.3	0	high	TCGA
TCGA-28-5207	11.3	1	low	TCGA
TCGA-28-5218	5.2	1	low	TCGA
TCGA-28-5220	12.8	1	low	TCGA
TCGA-32-1980	1.2	1	high	TCGA
TCGA-32-2615	15.9	1	high	TCGA
TCGA-32-2634	22.8	0	low	TCGA
TCGA-32-2638	25.2	1	high	TCGA
TCGA-41-3915	11.8	1	high	TCGA
TCGA-41-4097	0.2	1	high	TCGA
TCGA-41-5651	15.1	1	low	TCGA
TCGA-76-4925	4.8	1	high	TCGA
TCGA-76-4926	4.5	1	high	TCGA
TCGA-76-4928	3.1	1	high	TCGA
TCGA-76-4931	9.2	1	high	TCGA
TCGA-CS-4941	7.7	1	low	TCGA
TCGA-CS-5395	21	1	low	TCGA
TCGA-CS-6186	17.7	1	low	TCGA
TCGA-CS-6669	49.1	0	low	TCGA
TCGA-DH-5140	20	1	low	TCGA
TCGA-DU-6402	7	1	high	TCGA
TCGA-DU-6403	11.6	1	low	TCGA
TCGA-DU-7006	11.5	1	high	TCGA
TCGA-DU-7012	6.5	1	low	TCGA
TCGA-DU-7013	8.8	1	low	TCGA
TCGA-DU-7292	8	1	low	TCGA
TCGA-DU-8158	5.1	1	low	TCGA
TCGA-DU-8162	14.6	1	low	TCGA
TCGA-DU-8165	19.1	0	low	TCGA
TCGA-DU-A76K	11.4	1	low	TCGA
TCGA-DU-A7TB	51.5	0	low	TCGA
TCGA-DU-A7TD	7.5	1	low	TCGA
TCGA-DU-A7TJ	0.6	0	low	TCGA
TCGA-E1-A7YD	14.3	1	low	TCGA
TCGA-E1-A7YJ	19.5	1	high	TCGA
TCGA-E1-A7YL	16.2	1	low	TCGA
TCGA-E1-A7YM	21.3	1	low	TCGA
TCGA-E1-A7YN	23.9	1	high	TCGA
TCGA-E1-A7Z2	13.1	1	low	TCGA
TCGA-FG-5963	25.5	1	low	TCGA
TCGA-FG-6688	18.8	0	high	TCGA
TCGA-FG-A4MW	18.4	1	low	TCGA
TCGA-FG-A70Z	10.8	0	low	TCGA
TCGA-HT-7680	0.8	0	low	TCGA
TCGA-HT-7691	0.1	0	high	TCGA
TCGA-HT-7857	0.2	0	high	TCGA
TCGA-HT-7860	0.5	0	low	TCGA
TCGA-HT-7882	3.7	1	high	TCGA
TCGA-HT-8011	16.2	0	low	TCGA
TCGA-HT-8015	0.1	0	low	TCGA
TCGA-HT-8019	33	0	low	TCGA
TCGA-HT-8110	13.8	0	low	TCGA
TCGA-HT-8558	13.7	0	low	TCGA
TCGA-HT-8564	15.7	0	low	TCGA
TCGA-HT-A5RA	27.4	0	high	TCGA
TCGA-HT-A61C	17.7	1	high	TCGA
TCGA-HT-A74H	2.4	0	low	TCGA
TCGA-KT-A7W1	14.4	0	high	TCGA
TCGA-P5-A5EY	2.4	0	low	TCGA
TCGA-P5-A5F6	1.3	0	low	TCGA
TCGA-QH-A6CS	19.3	0	low	TCGA
TCGA-QH-A6CV	14.5	0	low	TCGA
TCGA-QH-A6CX	12.2	1	low	TCGA
TCGA-S9-A6WM	19.9	0	low	TCGA
TCGA-S9-A7R2	10.4	1	low	TCGA
TCGA-S9-A89V	18.7	0	low	TCGA
TCGA-TM-A7C3	54.8	1	low	TCGA
TCGA-TM-A84B	24.9	1	low	TCGA
TCGA-TM-A84C	16.2	1	high	TCGA
TCGA-TM-A84J	24.2	0	low	TCGA
TCGA-TQ-A7RP	30	0	low	TCGA
TCGA-VM-A8C9	43.2	0	low	TCGA
TCGA-VM-A8CD	7.9	1	high	TCGA
TCGA-VW-A8FI	8.1	1	high	TCGA
CGGA_1001	112.7	0	high	CGGA
CGGA_1002	10	1	low	CGGA
CGGA_1011	3.6	1	high	CGGA
CGGA_1015	5.4	1	high	CGGA
CGGA_1017	25.2	1	low	CGGA
CGGA_1019	7	1	high	CGGA
CGGA_1022	17	0	high	CGGA
CGGA_1024	101.1	1	high	CGGA
CGGA_1026	51.6	1	low	CGGA
CGGA_1035	18.6	1	high	CGGA
CGGA_1036	26.5	1	high	CGGA
CGGA_1041	105.3	0	low	CGGA
CGGA_1045	11.4	1	high	CGGA
CGGA_107	70.9	1	high	CGGA
CGGA_1074	2.8	1	high	CGGA
CGGA_1075	13.1	1	high	CGGA
CGGA_1077	19.4	1	high	CGGA
CGGA_1079	15.5	1	low	CGGA
CGGA_1083	14.8	1	high	CGGA
CGGA_1091	36.7	1	high	CGGA
CGGA_1099	4	1	low	CGGA
CGGA_1106	13.8	1	high	CGGA
CGGA_1109	44.3	1	low	CGGA
CGGA_1124	15.9	1	high	CGGA
CGGA_1134	1.9	1	high	CGGA
CGGA_1138	13.5	1	low	CGGA
CGGA_1139	39.3	1	high	CGGA
CGGA_1140	30.3	1	low	CGGA
CGGA_1141	14.2	1	low	CGGA
CGGA_1144	82.4	0	low	CGGA
CGGA_1145	7.9	1	high	CGGA
CGGA_1157	23.9	1	low	CGGA
CGGA_1177	14.8	1	high	CGGA
CGGA_1180	40.3	0	high	CGGA
CGGA_1208	5.3	1	high	CGGA
CGGA_1214	19.9	1	low	CGGA
CGGA_1224	8.9	1	high	CGGA
CGGA_1227	39.4	1	low	CGGA
CGGA_1234	23.2	1	high	CGGA
CGGA_1236	6.3	1	low	CGGA
CGGA_1240	0.6	1	high	CGGA
CGGA_1251	8.9	1	low	CGGA
CGGA_1255	3.9	1	high	CGGA
CGGA_1260	5.8	1	high	CGGA
CGGA_1270	6.2	1	high	CGGA
CGGA_1275	6	1	high	CGGA
CGGA_1280	14.7	1	low	CGGA
CGGA_1282	36.7	1	low	CGGA
CGGA_1283	0.7	1	low	CGGA
CGGA_1284	3.2	1	high	CGGA
CGGA_1285	2.6	1	high	CGGA
CGGA_1292	82.6	0	low	CGGA
CGGA_1313	12.5	1	high	CGGA
CGGA_1319	81.3	0	low	CGGA
CGGA_1320	1.9	1	low	CGGA
CGGA_1338	36.9	1	high	CGGA
CGGA_1340	36.5	1	low	CGGA
CGGA_1342	6.1	1	high	CGGA
CGGA_1346	9.3	1	high	CGGA
CGGA_135	63.3	1	high	CGGA
CGGA_1359	11.3	1	high	CGGA
CGGA_1362	79.4	0	low	CGGA
CGGA_1370	10.7	0	low	CGGA
CGGA_1380	9.6	1	low	CGGA
CGGA_1382	9.3	1	low	CGGA
CGGA_1387	3	1	low	CGGA
CGGA_1393	9	1	high	CGGA
CGGA_1402	77.4	0	high	CGGA
CGGA_1408	44.8	1	low	CGGA
CGGA_1410	27.1	1	low	CGGA
CGGA_1415	76.9	0	high	CGGA
CGGA_1420	12	1	low	CGGA
CGGA_1430	5.3	1	low	CGGA
CGGA_1433	13	1	high	CGGA
CGGA_1434	2.2	1	high	CGGA
CGGA_1437	34.1	1	low	CGGA
CGGA_1443	75.1	0	high	CGGA
CGGA_1451	14.4	1	high	CGGA
CGGA_1452	15.4	1	high	CGGA
CGGA_1454	74.8	0	low	CGGA
CGGA_1457	10.3	1	high	CGGA
CGGA_1462	5.7	1	high	CGGA
CGGA_1480	13.3	1	high	CGGA
CGGA_1492	8.8	1	high	CGGA
CGGA_1518	13.5	1	low	CGGA
CGGA_1529	19.2	1	low	CGGA
CGGA_1533	40	1	high	CGGA
CGGA_1537	3.2	1	low	CGGA
CGGA_1538	8.1	1	high	CGGA
CGGA_1541	2.2	1	low	CGGA
CGGA_1546	7.3	1	high	CGGA
CGGA_1558	4.3	1	low	CGGA
CGGA_1564	6.2	1	low	CGGA
CGGA_1572	5.3	1	low	CGGA
CGGA_1579	66.3	0	low	CGGA
CGGA_1586	7.6	1	high	CGGA
CGGA_1589	11.2	1	low	CGGA
CGGA_1596	6.7	1	low	CGGA
CGGA_1598	18.5	1	low	CGGA
CGGA_1603	11.7	1	high	CGGA
CGGA_1605	10.6	1	low	CGGA
CGGA_1606	15.5	1	low	CGGA
CGGA_1612	23.6	1	high	CGGA
CGGA_1613	8.2	0	high	CGGA
CGGA_1634	12	1	high	CGGA
CGGA_1644	5.7	1	high	CGGA
CGGA_1656	4.9	1	high	CGGA
CGGA_1659	12.7	1	high	CGGA
CGGA_1669	4.6	1	low	CGGA
CGGA_1670	12	1	low	CGGA
CGGA_1682	11.3	1	low	CGGA
CGGA_1686	24.5	1	low	CGGA
CGGA_1687	57.1	0	high	CGGA
CGGA_1690	19.5	1	high	CGGA
CGGA_1697	2.9	1	low	CGGA
CGGA_1698	12.8	1	high	CGGA
CGGA_1702	5.5	1	low	CGGA
CGGA_1704	55.4	0	low	CGGA
CGGA_1706	55.5	0	high	CGGA
CGGA_1708	36.9	1	high	CGGA
CGGA_1713	10.9	1	low	CGGA
CGGA_1735	26.7	1	low	CGGA
CGGA_1736	30.8	1	high	CGGA
CGGA_1738	15.4	1	low	CGGA
CGGA_1740	11.9	1	low	CGGA
CGGA_1750	8.2	1	low	CGGA
CGGA_1769	48.5	0	low	CGGA
CGGA_1773	3.4	1	high	CGGA
CGGA_1807	8.1	1	low	CGGA
CGGA_1809	11.3	1	low	CGGA
CGGA_1811	10	1	high	CGGA
CGGA_1812	25.6	1	high	CGGA
CGGA_1815	6.1	1	high	CGGA
CGGA_1819	43.5	0	high	CGGA
CGGA_1826	1.4	1	low	CGGA
CGGA_1829	26.3	0	low	CGGA
CGGA_1840	38.8	0	low	CGGA
CGGA_1862	3.6	1	high	CGGA
CGGA_1875	38.7	0	high	CGGA
CGGA_1901	17.8	1	high	CGGA
CGGA_1911	35.3	0	high	CGGA
CGGA_1946	4.7	1	high	CGGA
CGGA_1972	30.1	0	high	CGGA
CGGA_1976	2.4	1	high	CGGA
CGGA_2024	10.8	1	low	CGGA
CGGA_2075	8.7	1	high	CGGA
CGGA_2078	9.2	1	high	CGGA
CGGA_2115	5.6	1	low	CGGA
CGGA_272	7.1	1	high	CGGA
CGGA_318	7.3	1	high	CGGA
CGGA_323	142.6	0	low	CGGA
CGGA_413	6	0	low	CGGA
CGGA_426	51.3	1	high	CGGA
CGGA_448	11.6	1	high	CGGA
CGGA_474	66.7	0	low	CGGA
CGGA_483	9.1	1	high	CGGA
CGGA_521	16.9	1	low	CGGA
CGGA_541	133.1	0	low	CGGA
CGGA_564	22.3	1	low	CGGA
CGGA_565	118.5	0	low	CGGA
CGGA_568	9.4	1	high	CGGA
CGGA_578	11.9	1	low	CGGA
CGGA_599	13.7	1	low	CGGA
CGGA_604	12.5	1	high	CGGA
CGGA_619	18.1	1	low	CGGA
CGGA_633	59.6	1	low	CGGA
CGGA_643	10.9	1	low	CGGA
CGGA_659	24	0	low	CGGA
CGGA_680	78	1	low	CGGA
CGGA_727	33.6	1	low	CGGA
CGGA_763	10.5	0	low	CGGA
CGGA_777	4.8	1	high	CGGA
CGGA_780	30.3	1	low	CGGA
CGGA_782	9.5	1	low	CGGA
CGGA_791	8.3	1	low	CGGA
CGGA_796	18.4	0	low	CGGA
CGGA_802	22.4	1	high	CGGA
CGGA_804	20.2	0	low	CGGA
CGGA_807	122	0	low	CGGA
CGGA_808	38.4	0	low	CGGA
CGGA_810	18.1	1	high	CGGA
CGGA_842	6.7	1	high	CGGA
CGGA_846	98.3	0	low	CGGA
CGGA_852	5.6	1	low	CGGA
CGGA_859	12.7	1	high	CGGA
CGGA_863	68.2	1	low	CGGA
CGGA_869	17.7	0	high	CGGA
CGGA_876	5.2	1	high	CGGA
CGGA_878	28.4	1	high	CGGA
CGGA_881	8.3	1	high	CGGA
CGGA_887	33.2	0	low	CGGA
CGGA_D03	13.9	1	high	CGGA
CGGA_D26	8.6	1	high	CGGA
CGGA_D35	21.7	1	high	CGGA
CGGA_D36	1.1	1	high	CGGA
CGGA_D51	4.4	1	high	CGGA
CGGA_J130	92.3	0	low	CGGA
CGGA_P106	2.3	1	high	CGGA
CGGA_P108	42	0	low	CGGA
CGGA_P110	26.3	1	low	CGGA
CGGA_P112	27.4	1	low	CGGA
CGGA_P113	44.1	0	low	CGGA
CGGA_P121	40.9	0	low	CGGA
CGGA_P143	8.6	1	high	CGGA
CGGA_P155	36.9	0	low	CGGA
CGGA_P157	15.5	1	low	CGGA
CGGA_P159	6.9	1	low	CGGA
CGGA_P160	7.2	1	high	CGGA
CGGA_P177	35.5	0	low	CGGA
CGGA_P181	7.8	1	low	CGGA
CGGA_P182	37.8	0	high	CGGA
CGGA_P22	13.3	1	low	CGGA
CGGA_P280	32.2	0	low	CGGA
CGGA_P283	31.8	0	low	CGGA
CGGA_P295	9	1	low	CGGA
CGGA_P30	13.3	1	low	CGGA
CGGA_P31	49.8	0	high	CGGA
CGGA_P338	27.6	0	high	CGGA
CGGA_P385	24.8	0	low	CGGA
CGGA_P415	6.4	1	high	CGGA
CGGA_P483	9.8	1	low	CGGA
CGGA_P585	14.2	0	high	CGGA
CGGA_P594	2.8	1	high	CGGA
CGGA_P604	8.6	1	low	CGGA
CGGA_P7	3.6	1	high	CGGA
