# Supplementary material for: NF1 regulates mesenchymal glioblastoma plasticity and aggressiveness through the AP-1 transcription factor FOSL1
Source: eLife. 2021 Aug 17;10:e64846. doi: 10.7554/eLife.64846 (PMC8370767; doi:10.7554/eLife.64846)
Supplement: Figure 2—figure supplement 2—source data 4. [file elife-64846-fig2-figsupp2-data4.xlsx]

## Sheet: Figure2-S2C
# Source data Figure 2-figure supplement 2C
Cells	Sample	Replicate	Normalizer	Gene	CT_norm_value
BTSC 232	Ctrl	Rep1	18s	ITGA3	1.062
BTSC 232	Ctrl	Rep2	18s	ITGA3	0.984
BTSC 232	Ctrl	Rep3	18s	ITGA3	0.954
BTSC 232	GRD	Rep1	18s	ITGA3	0.413
BTSC 232	GRD	Rep2	18s	ITGA3	0.405
BTSC 232	GRD	Rep3	18s	ITGA3	0.36
BTSC 232	Ctrl	Rep1	18s	ITGA5	0.907
BTSC 232	Ctrl	Rep2	18s	ITGA5	0.888
BTSC 232	Ctrl	Rep3	18s	ITGA5	1.205
BTSC 232	GRD	Rep1	18s	ITGA5	0.738
BTSC 232	GRD	Rep2	18s	ITGA5	0.744
BTSC 232	GRD	Rep3	18s	ITGA5	0.738
BTSC 232	Ctrl	Rep1	18s	PLAU	1.068
BTSC 232	Ctrl	Rep2	18s	PLAU	0.976
BTSC 232	Ctrl	Rep3	18s	PLAU	0.956
BTSC 232	GRD	Rep1	18s	PLAU	0.981
BTSC 232	GRD	Rep2	18s	PLAU	1.077
BTSC 232	GRD	Rep3	18s	PLAU	1.446
BTSC 232	Ctrl	Rep1	18s	SERPINE1	1.116
BTSC 232	Ctrl	Rep2	18s	SERPINE1	1.013
BTSC 232	Ctrl	Rep3	18s	SERPINE1	0.871
BTSC 232	GRD	Rep1	18s	SERPINE1	0.322
BTSC 232	GRD	Rep2	18s	SERPINE1	0.468
BTSC 232	GRD	Rep3	18s	SERPINE1	0.528
BTSC 232	Ctrl	Rep1	18s	TNC	1.086
BTSC 232	Ctrl	Rep2	18s	TNC	0.911
BTSC 232	Ctrl	Rep3	18s	TNC	1.003
BTSC 232	GRD	Rep1	18s	TNC	1.194
BTSC 232	GRD	Rep2	18s	TNC	1.212
BTSC 232	GRD	Rep3	18s	TNC	1.293
BTSC 233	Ctrl	Rep1	18s	ITGA3	1.036
BTSC 233	Ctrl	Rep2	18s	ITGA3	1.065
BTSC 233	Ctrl	Rep3	18s	ITGA3	0.899
BTSC 233	GRD	Rep1	18s	ITGA3	0.294
BTSC 233	GRD	Rep2	18s	ITGA3	0.278
BTSC 233	GRD	Rep3	18s	ITGA3	0.259
BTSC 233	Ctrl	Rep1	18s	ITGA5	0.909
BTSC 233	Ctrl	Rep2	18s	ITGA5	0.937
BTSC 233	Ctrl	Rep3	18s	ITGA5	1.155
BTSC 233	GRD	Rep1	18s	ITGA5	0.486
BTSC 233	GRD	Rep2	18s	ITGA5	0.538
BTSC 233	GRD	Rep3	18s	ITGA5	0.489
BTSC 233	Ctrl	Rep1	18s	PLAU	1.057
BTSC 233	Ctrl	Rep2	18s	PLAU	0.988
BTSC 233	Ctrl	Rep3	18s	PLAU	0.954
BTSC 233	GRD	Rep1	18s	PLAU	0.571
BTSC 233	GRD	Rep2	18s	PLAU	0.596
BTSC 233	GRD	Rep3	18s	PLAU	0.735
BTSC 233	Ctrl	Rep1	18s	SERPINE1	1.098
BTSC 233	Ctrl	Rep2	18s	SERPINE1	1.018
BTSC 233	Ctrl	Rep3	18s	SERPINE1	0.884
BTSC 233	GRD	Rep1	18s	SERPINE1	0.432
BTSC 233	GRD	Rep2	18s	SERPINE1	0.363
BTSC 233	GRD	Rep3	18s	SERPINE1	0.412
BTSC 233	Ctrl	Rep1	18s	TNC	1.064
BTSC 233	Ctrl	Rep2	18s	TNC	0.996
BTSC 233	Ctrl	Rep3	18s	TNC	0.94
BTSC 233	GRD	Rep1	18s	TNC	0.831
BTSC 233	GRD	Rep2	18s	TNC	0.788
BTSC 233	GRD	Rep3	18s	TNC	0.898

## Sheet: Figure2-S2G
# Source data Figure 2-figure supplement 2G
Cells	Sample	Replicate	Normalizer	Gene	CT_norm_value
BTSC 3021	shCtrl	Rep1	18s	ITGA3	1.108
BTSC 3021	shCtrl	Rep2	18s	ITGA3	1.112
BTSC 3021	shCtrl	Rep3	18s	ITGA3	0.78
BTSC 3021	shNF1_1	Rep1	18s	ITGA3	2.353
BTSC 3021	shNF1_1	Rep2	18s	ITGA3	2.184
BTSC 3021	shNF1_1	Rep3	18s	ITGA3	2.306
BTSC 3021	shNF1_5	Rep1	18s	ITGA3	1.965
BTSC 3021	shNF1_5	Rep2	18s	ITGA3	1.644
BTSC 3021	shNF1_5	Rep3	18s	ITGA3	1.867
BTSC 3021	shCtrl	Rep1	18s	ITGA5	0.948
BTSC 3021	shCtrl	Rep2	18s	ITGA5	1.009
BTSC 3021	shCtrl	Rep3	18s	ITGA5	1.043
BTSC 3021	shNF1_1	Rep1	18s	ITGA5	2.221
BTSC 3021	shNF1_1	Rep2	18s	ITGA5	1.676
BTSC 3021	shNF1_1	Rep3	18s	ITGA5	2.062
BTSC 3021	shNF1_5	Rep1	18s	ITGA5	1.236
BTSC 3021	shNF1_5	Rep2	18s	ITGA5	1.801
BTSC 3021	shNF1_5	Rep3	18s	ITGA5	1.859
BTSC 3021	shCtrl	Rep1	18s	PLAU	0.947
BTSC 3021	shCtrl	Rep2	18s	PLAU	1.007
BTSC 3021	shCtrl	Rep3	18s	PLAU	1.046
BTSC 3021	shNF1_1	Rep1	18s	PLAU	1.263
BTSC 3021	shNF1_1	Rep2	18s	PLAU	1.227
BTSC 3021	shNF1_1	Rep3	18s	PLAU	1.307
BTSC 3021	shNF1_5	Rep1	18s	PLAU	0.939
BTSC 3021	shNF1_5	Rep2	18s	PLAU	0.895
BTSC 3021	shNF1_5	Rep3	18s	PLAU	1.076
BTSC 3021	shCtrl	Rep1	18s	SERPINE1	1.102
BTSC 3021	shCtrl	Rep2	18s	SERPINE1	1.114
BTSC 3021	shCtrl	Rep3	18s	SERPINE1	0.784
BTSC 3021	shNF1_1	Rep1	18s	SERPINE1	2.228
BTSC 3021	shNF1_1	Rep2	18s	SERPINE1	2.466
BTSC 3021	shNF1_1	Rep3	18s	SERPINE1	2.597
BTSC 3021	shNF1_5	Rep1	18s	SERPINE1	2.091
BTSC 3021	shNF1_5	Rep2	18s	SERPINE1	2.168
BTSC 3021	shNF1_5	Rep3	18s	SERPINE1	1.96
BTSC 3021	shCtrl	Rep1	18s	TNC	1.012
BTSC 3021	shCtrl	Rep2	18s	TNC	1.027
BTSC 3021	shCtrl	Rep3	18s	TNC	0.961
BTSC 3021	shNF1_1	Rep1	18s	TNC	1.462
BTSC 3021	shNF1_1	Rep2	18s	TNC	1.385
BTSC 3021	shNF1_1	Rep3	18s	TNC	1.422
BTSC 3021	shNF1_5	Rep1	18s	TNC	1.126
BTSC 3021	shNF1_5	Rep2	18s	TNC	1.064
BTSC 3021	shNF1_5	Rep3	18s	TNC	1.256
BTSC 3047	shCtrl	Rep1	18s	ITGA3	1.055
BTSC 3047	shCtrl	Rep2	18s	ITGA3	0.983
BTSC 3047	shCtrl	Rep3	18s	ITGA3	0.963
BTSC 3047	shNF1_4	Rep1	18s	ITGA3	1.658
BTSC 3047	shNF1_4	Rep2	18s	ITGA3	1.538
BTSC 3047	shNF1_4	Rep3	18s	ITGA3	1.5
BTSC 3047	shNF1_5	Rep1	18s	ITGA3	1.126
BTSC 3047	shNF1_5	Rep2	18s	ITGA3	1.12
BTSC 3047	shNF1_5	Rep3	18s	ITGA3	1.163
BTSC 3047	shCtrl	Rep1	18s	ITGA5	0.953
BTSC 3047	shCtrl	Rep2	18s	ITGA5	0.962
BTSC 3047	shCtrl	Rep3	18s	ITGA5	1.085
BTSC 3047	shNF1_4	Rep1	18s	ITGA5	1.5
BTSC 3047	shNF1_4	Rep2	18s	ITGA5	1.141
BTSC 3047	shNF1_4	Rep3	18s	ITGA5	0.893
BTSC 3047	shNF1_5	Rep1	18s	ITGA5	1.128
BTSC 3047	shNF1_5	Rep2	18s	ITGA5	1.16
BTSC 3047	shNF1_5	Rep3	18s	ITGA5	1.065
BTSC 3047	shCtrl	Rep1	18s	PLAU	1.064
BTSC 3047	shCtrl	Rep2	18s	PLAU	0.984
BTSC 3047	shCtrl	Rep3	18s	PLAU	0.952
BTSC 3047	shNF1_4	Rep1	18s	PLAU	1.421
BTSC 3047	shNF1_4	Rep2	18s	PLAU	1.158
BTSC 3047	shNF1_4	Rep3	18s	PLAU	1.021
BTSC 3047	shNF1_5	Rep1	18s	PLAU	1.067
BTSC 3047	shNF1_5	Rep2	18s	PLAU	1.156
BTSC 3047	shNF1_5	Rep3	18s	PLAU	1.375
BTSC 3047	shCtrl	Rep1	18s	SERPINE1	1.066
BTSC 3047	shCtrl	Rep2	18s	SERPINE1	0.898
BTSC 3047	shCtrl	Rep3	18s	SERPINE1	1.036
BTSC 3047	shNF1_4	Rep1	18s	SERPINE1	1.691
BTSC 3047	shNF1_4	Rep2	18s	SERPINE1	1.432
BTSC 3047	shNF1_4	Rep3	18s	SERPINE1	1.503
BTSC 3047	shNF1_5	Rep1	18s	SERPINE1	1.563
BTSC 3047	shNF1_5	Rep2	18s	SERPINE1	1.66
BTSC 3047	shNF1_5	Rep3	18s	SERPINE1	1.804
BTSC 3047	shCtrl	Rep1	18s	TNC	1.039
BTSC 3047	shCtrl	Rep2	18s	TNC	0.971
BTSC 3047	shCtrl	Rep3	18s	TNC	0.99
BTSC 3047	shNF1_4	Rep1	18s	TNC	1.374
BTSC 3047	shNF1_4	Rep2	18s	TNC	1.168
BTSC 3047	shNF1_4	Rep3	18s	TNC	1.29
BTSC 3047	shNF1_5	Rep1	18s	TNC	0.859
BTSC 3047	shNF1_5	Rep2	18s	TNC	0.892
BTSC 3047	shNF1_5	Rep3	18s	TNC	0.945

## Sheet: Figure2-S2H
# Source data Figure 2-figure supplement 2H
Cells	Sample	Replicate	Normalizer	Gene	CT_norm_value
BTSC 233	Ctrl	Rep1	18s	BHLHB2	1.164
BTSC 233	Ctrl	Rep2	18s	BHLHB2	1.009
BTSC 233	Ctrl	Rep3	18s	BHLHB2	0.827
BTSC 233	GRD	Rep1	18s	BHLHB2	1.01
BTSC 233	GRD	Rep2	18s	BHLHB2	1.322
BTSC 233	GRD	Rep3	18s	BHLHB2	1.178
BTSC 233	Ctrl	Rep1	18s	CEBPB	1.147
BTSC 233	Ctrl	Rep2	18s	CEBPB	0.932
BTSC 233	Ctrl	Rep3	18s	CEBPB	0.921
BTSC 233	GRD	Rep1	18s	CEBPB	0.378
BTSC 233	GRD	Rep2	18s	CEBPB	0.426
BTSC 233	GRD	Rep3	18s	CEBPB	0.427
BTSC 233	Ctrl	Rep1	18s	FOSL2	1.016
BTSC 233	Ctrl	Rep2	18s	FOSL2	1.01
BTSC 233	Ctrl	Rep3	18s	FOSL2	0.973
BTSC 233	GRD	Rep1	18s	FOSL2	1.468
BTSC 233	GRD	Rep2	18s	FOSL2	1.474
BTSC 233	GRD	Rep3	18s	FOSL2	1.241
BTSC 233	Ctrl	Rep1	18s	RUNX1	0.9
BTSC 233	Ctrl	Rep2	18s	RUNX1	1.055
BTSC 233	Ctrl	Rep3	18s	RUNX1	1.045
BTSC 233	GRD	Rep1	18s	RUNX1	1.042
BTSC 233	GRD	Rep2	18s	RUNX1	0.974
BTSC 233	GRD	Rep3	18s	RUNX1	0.905
BTSC 233	Ctrl	Rep1	18s	STAT3	1.046
BTSC 233	Ctrl	Rep2	18s	STAT3	0.986
BTSC 233	Ctrl	Rep3	18s	STAT3	0.968
BTSC 233	GRD	Rep1	18s	STAT3	1.201
BTSC 233	GRD	Rep2	18s	STAT3	1.295
BTSC 233	GRD	Rep3	18s	STAT3	0.93
BTSC 233	Ctrl	Rep1	18s	TAZ	1.039
BTSC 233	Ctrl	Rep2	18s	TAZ	0.751
BTSC 233	Ctrl	Rep3	18s	TAZ	1.209
BTSC 233	GRD	Rep1	18s	TAZ	0.907
BTSC 233	GRD	Rep2	18s	TAZ	0.978
BTSC 233	GRD	Rep3	18s	TAZ	1.154

## Sheet: Figure2-S2I
# Source data Figure 2-figure supplement 2I
Cells	Sample	Replicate	Normalizer	Gene	CT_norm_value
BTSC 3021	shCtrl	Rep1	18s	BHLHB2	1.09
BTSC 3021	shCtrl	Rep2	18s	BHLHB2	1.085
BTSC 3021	shCtrl	Rep3	18s	BHLHB2	0.826
BTSC 3021	shNF1	Rep1	18s	BHLHB2	0.985
BTSC 3021	shNF1	Rep2	18s	BHLHB2	1.022
BTSC 3021	shNF1	Rep3	18s	BHLHB2	0.995
BTSC 3021	shCtrl	Rep1	GAPDH	CEBPB	0.782
BTSC 3021	shCtrl	Rep2	GAPDH	CEBPB	1.03
BTSC 3021	shCtrl	Rep3	GAPDH	CEBPB	1.188
BTSC 3021	shNF1	Rep1	GAPDH	CEBPB	5.045
BTSC 3021	shNF1	Rep2	GAPDH	CEBPB	3.711
BTSC 3021	shNF1	Rep3	GAPDH	CEBPB	2.353
BTSC 3021	shCtrl	Rep1	18s	FOSL2	1.016
BTSC 3021	shCtrl	Rep2	18s	FOSL2	1.01
BTSC 3021	shCtrl	Rep3	18s	FOSL2	0.973
BTSC 3021	shNF1	Rep1	18s	FOSL2	1.468
BTSC 3021	shNF1	Rep2	18s	FOSL2	1.474
BTSC 3021	shNF1	Rep3	18s	FOSL2	1.241
BTSC 3021	shCtrl	Rep1	18s	RUNX1	1.148
BTSC 3021	shCtrl	Rep2	18s	RUNX1	1.014
BTSC 3021	shCtrl	Rep3	18s	RUNX1	0.837
BTSC 3021	shNF1	Rep1	18s	RUNX1	0.837
BTSC 3021	shNF1	Rep2	18s	RUNX1	0.956
BTSC 3021	shNF1	Rep3	18s	RUNX1	1.605
BTSC 3021	shCtrl	Rep1	18s	STAT3	0.991
BTSC 3021	shCtrl	Rep2	18s	STAT3	1.613
BTSC 3021	shCtrl	Rep3	18s	STAT3	0.396
BTSC 3021	shNF1	Rep1	18s	STAT3	0.381
BTSC 3021	shNF1	Rep2	18s	STAT3	0.988
BTSC 3021	shNF1	Rep3	18s	STAT3	0.558
BTSC 3021	shCtrl	Rep1	18s	TAZ	1.159
BTSC 3021	shCtrl	Rep2	18s	TAZ	1.066
BTSC 3021	shCtrl	Rep3	18s	TAZ	0.775
BTSC 3021	shNF1	Rep1	18s	TAZ	1.149
BTSC 3021	shNF1	Rep2	18s	TAZ	1.383
BTSC 3021	shNF1	Rep3	18s	TAZ	1.201
