# Supplementary material for: NF1 regulates mesenchymal glioblastoma plasticity and aggressiveness through the AP-1 transcription factor FOSL1
Source: eLife. 2021 Aug 17;10:e64846. doi: 10.7554/eLife.64846 (PMC8370767; doi:10.7554/eLife.64846)
Supplement: Figure 2—figure supplement 3—source data 4. [file elife-64846-fig2-figsupp3-data4.xlsx]

## Sheet: Figure2-S3B
# Source data Figure 2-figure supplement 3B
Cells	Sample	Replicate	Normalizer	Gene	CT
BTSC 3021	shCtrl_DMSO	Rep1	18s	18s	12.02
BTSC 3021	shCtrl_DMSO	Rep2	18s	18s	11.748
BTSC 3021	shCtrl_DMSO	Rep3	18s	18s	12.044
BTSC 3021	shCtrl_GDC-0623	Rep1	18s	18s	11.869
BTSC 3021	shCtrl_GDC-0623	Rep2	18s	18s	11.942
BTSC 3021	shCtrl_GDC-0623	Rep3	18s	18s	11.772
BTSC 3021	shNF1_5_DMSO	Rep1	18s	18s	13.293
BTSC 3021	shNF1_5_DMSO	Rep2	18s	18s	13.298
BTSC 3021	shNF1_5_DMSO	Rep3	18s	18s	13.432
BTSC 3021	shNF1_5_GDC-0623	Rep1	18s	18s	12.282
BTSC 3021	shNF1_5_GDC-0623	Rep2	18s	18s	11.971
BTSC 3021	shNF1_5_GDC-0623	Rep3	18s	18s	12.134
BTSC 3021	shCtrl_DMSO	Rep1	18s	FOSL1	22.9
BTSC 3021	shCtrl_DMSO	Rep2	18s	FOSL1	22.927
BTSC 3021	shCtrl_DMSO	Rep3	18s	FOSL1	22.687
BTSC 3021	shCtrl_GDC-0623	Rep1	18s	FOSL1	24.928
BTSC 3021	shCtrl_GDC-0623	Rep2	18s	FOSL1	24.827
BTSC 3021	shCtrl_GDC-0623	Rep3	18s	FOSL1	24.823
BTSC 3021	shNF1_5_DMSO	Rep1	18s	FOSL1	23.191
BTSC 3021	shNF1_5_DMSO	Rep2	18s	FOSL1	23.101
BTSC 3021	shNF1_5_DMSO	Rep3	18s	FOSL1	23.167
BTSC 3021	shNF1_5_GDC-0623	Rep1	18s	FOSL1	25.232
BTSC 3021	shNF1_5_GDC-0623	Rep2	18s	FOSL1	25.193
BTSC 3021	shNF1_5_GDC-0623	Rep3	18s	FOSL1	25.112
BTSC 3021	shCtrl_DMSO	Rep1	18s	ITGA3	24.891
BTSC 3021	shCtrl_DMSO	Rep2	18s	ITGA3	24.743
BTSC 3021	shCtrl_DMSO	Rep3	18s	ITGA3	24.773
BTSC 3021	shCtrl_GDC-0623	Rep1	18s	ITGA3	25.886
BTSC 3021	shCtrl_GDC-0623	Rep2	18s	ITGA3	25.732
BTSC 3021	shCtrl_GDC-0623	Rep3	18s	ITGA3	25.746
BTSC 3021	shNF1_5_DMSO	Rep1	18s	ITGA3	24.278
BTSC 3021	shNF1_5_DMSO	Rep2	18s	ITGA3	24.078
BTSC 3021	shNF1_5_DMSO	Rep3	18s	ITGA3	24.163
BTSC 3021	shNF1_5_GDC-0623	Rep1	18s	ITGA3	25.958
BTSC 3021	shNF1_5_GDC-0623	Rep2	18s	ITGA3	25.766
BTSC 3021	shNF1_5_GDC-0623	Rep3	18s	ITGA3	25.928
BTSC 3021	shCtrl_DMSO	Rep1	18s	SERPINE1	18.766
BTSC 3021	shCtrl_DMSO	Rep2	18s	SERPINE1	18.768
BTSC 3021	shCtrl_DMSO	Rep3	18s	SERPINE1	18.838
BTSC 3021	shCtrl_GDC-0623	Rep1	18s	SERPINE1	19.928
BTSC 3021	shCtrl_GDC-0623	Rep2	18s	SERPINE1	19.83
BTSC 3021	shCtrl_GDC-0623	Rep3	18s	SERPINE1	19.872
BTSC 3021	shNF1_5_DMSO	Rep1	18s	SERPINE1	19.759
BTSC 3021	shNF1_5_DMSO	Rep2	18s	SERPINE1	19.712
BTSC 3021	shNF1_5_DMSO	Rep3	18s	SERPINE1	19.778
BTSC 3021	shNF1_5_GDC-0623	Rep1	18s	SERPINE1	20.648
BTSC 3021	shNF1_5_GDC-0623	Rep2	18s	SERPINE1	20.574
BTSC 3021	shNF1_5_GDC-0623	Rep3	18s	SERPINE1	20.487
BTSC 3047	shCtrl_DMSO	Rep1	18s	18s	11.646
BTSC 3047	shCtrl_DMSO	Rep2	18s	18s	11.317
BTSC 3047	shCtrl_DMSO	Rep3	18s	18s	11.485
BTSC 3047	shCtrl_GDC-0623	Rep1	18s	18s	11.943
BTSC 3047	shCtrl_GDC-0623	Rep2	18s	18s	11.996
BTSC 3047	shCtrl_GDC-0623	Rep3	18s	18s	11.821
BTSC 3047	shNF1_5_DMSO	Rep1	18s	18s	11.825
BTSC 3047	shNF1_5_DMSO	Rep2	18s	18s	11.891
BTSC 3047	shNF1_5_DMSO	Rep3	18s	18s	11.974
BTSC 3047	shNF1_5_GDC-0623	Rep1	18s	18s	11.973
BTSC 3047	shNF1_5_GDC-0623	Rep2	18s	18s	11.736
BTSC 3047	shNF1_5_GDC-0623	Rep3	18s	18s	11.902
BTSC 3047	shCtrl_DMSO	Rep1	18s	FOSL1	26.948
BTSC 3047	shCtrl_DMSO	Rep2	18s	FOSL1	27.048
BTSC 3047	shCtrl_DMSO	Rep3	18s	FOSL1	26.868
BTSC 3047	shCtrl_GDC-0623	Rep1	18s	FOSL1	29.857
BTSC 3047	shCtrl_GDC-0623	Rep2	18s	FOSL1	29.837
BTSC 3047	shCtrl_GDC-0623	Rep3	18s	FOSL1	29.929
BTSC 3047	shNF1_5_DMSO	Rep1	18s	FOSL1	26.479
BTSC 3047	shNF1_5_DMSO	Rep2	18s	FOSL1	26.521
BTSC 3047	shNF1_5_DMSO	Rep3	18s	FOSL1	26.466
BTSC 3047	shNF1_5_GDC-0623	Rep1	18s	FOSL1	29.814
BTSC 3047	shNF1_5_GDC-0623	Rep2	18s	FOSL1	29.603
BTSC 3047	shNF1_5_GDC-0623	Rep3	18s	FOSL1	29.902
BTSC 3047	shCtrl_DMSO	Rep1	18s	ITGA3	26.922
BTSC 3047	shCtrl_DMSO	Rep2	18s	ITGA3	26.795
BTSC 3047	shCtrl_DMSO	Rep3	18s	ITGA3	26.738
BTSC 3047	shCtrl_GDC-0623	Rep1	18s	ITGA3	27.279
BTSC 3047	shCtrl_GDC-0623	Rep2	18s	ITGA3	27.158
BTSC 3047	shCtrl_GDC-0623	Rep3	18s	ITGA3	27.177
BTSC 3047	shNF1_5_DMSO	Rep1	18s	ITGA3	26.464
BTSC 3047	shNF1_5_DMSO	Rep2	18s	ITGA3	26.342
BTSC 3047	shNF1_5_DMSO	Rep3	18s	ITGA3	26.48
BTSC 3047	shNF1_5_GDC-0623	Rep1	18s	ITGA3	26.933
BTSC 3047	shNF1_5_GDC-0623	Rep2	18s	ITGA3	26.775
BTSC 3047	shNF1_5_GDC-0623	Rep3	18s	ITGA3	26.931
BTSC 3047	shCtrl_DMSO	Rep1	18s	SERPINE1	24.795
BTSC 3047	shCtrl_DMSO	Rep2	18s	SERPINE1	24.927
BTSC 3047	shCtrl_DMSO	Rep3	18s	SERPINE1	24.871
BTSC 3047	shCtrl_GDC-0623	Rep1	18s	SERPINE1	26.501
BTSC 3047	shCtrl_GDC-0623	Rep2	18s	SERPINE1	26.336
BTSC 3047	shCtrl_GDC-0623	Rep3	18s	SERPINE1	26.389
BTSC 3047	shNF1_5_DMSO	Rep1	18s	SERPINE1	24.097
BTSC 3047	shNF1_5_DMSO	Rep2	18s	SERPINE1	24.127
BTSC 3047	shNF1_5_DMSO	Rep3	18s	SERPINE1	24.119
BTSC 3047	shNF1_5_GDC-0623	Rep1	18s	SERPINE1	25.188
BTSC 3047	shNF1_5_GDC-0623	Rep2	18s	SERPINE1	25.237
BTSC 3047	shNF1_5_GDC-0623	Rep3	18s	SERPINE1	25.265

## Sheet: Figure2-S3D
# Source data Figure 2-figure supplement 3D
Cells	Sample	Replicate	Normalizer	Gene	CT
KSS49_7	Parental_DMSO	Rep1	Actin	Actin	18.553
KSS49_7	Parental_DMSO	Rep2	Actin	Actin	18.659
KSS49_7	Parental_DMSO	Rep3	Actin	Actin	18.86
KSS49_7	Parental_DMSO	Rep1	Actin	Fosl1	29.412
KSS49_7	Parental_DMSO	Rep2	Actin	Fosl1	29.414
KSS49_7	Parental_DMSO	Rep3	Actin	Fosl1	29.405
KSS49_7	Parental_DMSO	Rep1	Actin	Plau	30.931
KSS49_7	Parental_DMSO	Rep2	Actin	Plau	30.507
KSS49_7	Parental_DMSO	Rep3	Actin	Plau	30.802
KSS49_7	Parental_DMSO	Rep1	Actin	Plaur	26.057
KSS49_7	Parental_DMSO	Rep2	Actin	Plaur	26.204
KSS49_7	Parental_DMSO	Rep3	Actin	Plaur	25.993
KSS49_7	Parental_DMSO	Rep1	Actin	Timp1	25.886
KSS49_7	Parental_DMSO	Rep2	Actin	Timp1	25.848
KSS49_7	Parental_DMSO	Rep3	Actin	Timp1	25.793
KSS49_7	Parental_DMSO	Rep1	Actin	Cd44	23.107
KSS49_7	Parental_DMSO	Rep2	Actin	Cd44	23.034
KSS49_7	Parental_DMSO	Rep3	Actin	Cd44	23.05
KSS49_7	shNf1_DMSO	Rep1	Actin	Actin	19.397
KSS49_7	shNf1_DMSO	Rep2	Actin	Actin	19.171
KSS49_7	shNf1_DMSO	Rep3	Actin	Actin	19.505
KSS49_7	shNf1_DMSO	Rep1	Actin	Fosl1	26.262
KSS49_7	shNf1_DMSO	Rep2	Actin	Fosl1	26.353
KSS49_7	shNf1_DMSO	Rep3	Actin	Fosl1	26.316
KSS49_7	shNf1_DMSO	Rep1	Actin	Plau	29.106
KSS49_7	shNf1_DMSO	Rep2	Actin	Plau	29.307
KSS49_7	shNf1_DMSO	Rep3	Actin	Plau	28.987
KSS49_7	shNf1_DMSO	Rep1	Actin	Plaur	24.869
KSS49_7	shNf1_DMSO	Rep2	Actin	Plaur	24.797
KSS49_7	shNf1_DMSO	Rep3	Actin	Plaur	24.794
KSS49_7	shNf1_DMSO	Rep1	Actin	Timp1	23.083
KSS49_7	shNf1_DMSO	Rep2	Actin	Timp1	23.093
KSS49_7	shNf1_DMSO	Rep3	Actin	Timp1	23.094
KSS49_7	shNf1_DMSO	Rep1	Actin	Cd44	22.526
KSS49_7	shNf1_DMSO	Rep2	Actin	Cd44	22.386
KSS49_7	shNf1_DMSO	Rep3	Actin	Cd44	22.269
KSS49_7	KrasG12V_DMSO	Rep1	Actin	Actin	18.816
KSS49_7	KrasG12V_DMSO	Rep2	Actin	Actin	18.964
KSS49_7	KrasG12V_DMSO	Rep3	Actin	Actin	18.992
KSS49_7	KrasG12V_DMSO	Rep1	Actin	Fosl1	26.166
KSS49_7	KrasG12V_DMSO	Rep2	Actin	Fosl1	26.163
KSS49_7	KrasG12V_DMSO	Rep3	Actin	Fosl1	26.086
KSS49_7	KrasG12V_DMSO	Rep1	Actin	Plau	26.925
KSS49_7	KrasG12V_DMSO	Rep2	Actin	Plau	26.905
KSS49_7	KrasG12V_DMSO	Rep3	Actin	Plau	27.135
KSS49_7	KrasG12V_DMSO	Rep1	Actin	Plaur	24.517
KSS49_7	KrasG12V_DMSO	Rep2	Actin	Plaur	24.488
KSS49_7	KrasG12V_DMSO	Rep3	Actin	Plaur	24.443
KSS49_7	KrasG12V_DMSO	Rep1	Actin	Timp1	22.513
KSS49_7	KrasG12V_DMSO	Rep2	Actin	Timp1	22.28
KSS49_7	KrasG12V_DMSO	Rep3	Actin	Timp1	22.346
KSS49_7	KrasG12V_DMSO	Rep1	Actin	Cd44	22.587
KSS49_7	KrasG12V_DMSO	Rep2	Actin	Cd44	22.39
KSS49_7	KrasG12V_DMSO	Rep3	Actin	Cd44	22.403
KSS49_7	Parental_Trametinib	Rep1	Actin	Actin	18.659
KSS49_7	Parental_Trametinib	Rep2	Actin	Actin	19.166
KSS49_7	Parental_Trametinib	Rep3	Actin	Actin	18.818
KSS49_7	Parental_Trametinib	Rep1	Actin	Fosl1	32.873
KSS49_7	Parental_Trametinib	Rep2	Actin	Fosl1	32.922
KSS49_7	Parental_Trametinib	Rep3	Actin	Fosl1	32.907
KSS49_7	Parental_Trametinib	Rep1	Actin	Plau	30.877
KSS49_7	Parental_Trametinib	Rep2	Actin	Plau	31.175
KSS49_7	Parental_Trametinib	Rep3	Actin	Plau	30.925
KSS49_7	Parental_Trametinib	Rep1	Actin	Plaur	29.154
KSS49_7	Parental_Trametinib	Rep2	Actin	Plaur	29.123
KSS49_7	Parental_Trametinib	Rep3	Actin	Plaur	29.222
KSS49_7	Parental_Trametinib	Rep1	Actin	Timp1	28.946
KSS49_7	Parental_Trametinib	Rep2	Actin	Timp1	28.695
KSS49_7	Parental_Trametinib	Rep3	Actin	Timp1	28.806
KSS49_7	Parental_Trametinib	Rep1	Actin	Cd44	24.95
KSS49_7	Parental_Trametinib	Rep2	Actin	Cd44	24.876
KSS49_7	Parental_Trametinib	Rep3	Actin	Cd44	24.958
KSS49_7	shNf1_Trametinib	Rep1	Actin	Actin	18.981
KSS49_7	shNf1_Trametinib	Rep2	Actin	Actin	19.011
KSS49_7	shNf1_Trametinib	Rep3	Actin	Actin	19.013
KSS49_7	shNf1_Trametinib	Rep1	Actin	Fosl1	30.392
KSS49_7	shNf1_Trametinib	Rep2	Actin	Fosl1	30.327
KSS49_7	shNf1_Trametinib	Rep3	Actin	Fosl1	30.544
KSS49_7	shNf1_Trametinib	Rep1	Actin	Plau	30.015
KSS49_7	shNf1_Trametinib	Rep2	Actin	Plau	29.943
KSS49_7	shNf1_Trametinib	Rep3	Actin	Plau	30.151
KSS49_7	shNf1_Trametinib	Rep1	Actin	Plaur	29.221
KSS49_7	shNf1_Trametinib	Rep2	Actin	Plaur	28.95
KSS49_7	shNf1_Trametinib	Rep3	Actin	Plaur	28.953
KSS49_7	shNf1_Trametinib	Rep1	Actin	Timp1	26.214
KSS49_7	shNf1_Trametinib	Rep2	Actin	Timp1	26.649
KSS49_7	shNf1_Trametinib	Rep3	Actin	Timp1	26.469
KSS49_7	shNf1_Trametinib	Rep1	Actin	Cd44	23.82
KSS49_7	shNf1_Trametinib	Rep2	Actin	Cd44	23.825
KSS49_7	shNf1_Trametinib	Rep3	Actin	Cd44	23.784
KSS49_7	KrasG12V_Trametinib	Rep1	Actin	Actin	18.601
KSS49_7	KrasG12V_Trametinib	Rep2	Actin	Actin	18.69
KSS49_7	KrasG12V_Trametinib	Rep3	Actin	Actin	18.832
KSS49_7	KrasG12V_Trametinib	Rep1	Actin	Fosl1	30.528
KSS49_7	KrasG12V_Trametinib	Rep2	Actin	Fosl1	30.047
KSS49_7	KrasG12V_Trametinib	Rep3	Actin	Fosl1	30.413
KSS49_7	KrasG12V_Trametinib	Rep1	Actin	Plau	29.007
KSS49_7	KrasG12V_Trametinib	Rep2	Actin	Plau	28.553
KSS49_7	KrasG12V_Trametinib	Rep3	Actin	Plau	28.845
KSS49_7	KrasG12V_Trametinib	Rep1	Actin	Plaur	28.032
KSS49_7	KrasG12V_Trametinib	Rep2	Actin	Plaur	28.025
KSS49_7	KrasG12V_Trametinib	Rep3	Actin	Plaur	28.118
KSS49_7	KrasG12V_Trametinib	Rep1	Actin	Timp1	25.616
KSS49_7	KrasG12V_Trametinib	Rep2	Actin	Timp1	25.699
KSS49_7	KrasG12V_Trametinib	Rep3	Actin	Timp1	25.69
KSS49_7	KrasG12V_Trametinib	Rep1	Actin	Cd44	23.653
KSS49_7	KrasG12V_Trametinib	Rep2	Actin	Cd44	23.706
KSS49_7	KrasG12V_Trametinib	Rep3	Actin	Cd44	23.586
KSS49_7	Parental_U0126	Rep1	Actin	Actin	18.742
KSS49_7	Parental_U0126	Rep2	Actin	Actin	18.933
KSS49_7	Parental_U0126	Rep3	Actin	Actin	18.833
KSS49_7	Parental_U0126	Rep1	Actin	Fosl1	31.02
KSS49_7	Parental_U0126	Rep2	Actin	Fosl1	31.129
KSS49_7	Parental_U0126	Rep3	Actin	Fosl1	30.792
KSS49_7	Parental_U0126	Rep1	Actin	Plau	30.856
KSS49_7	Parental_U0126	Rep2	Actin	Plau	30.602
KSS49_7	Parental_U0126	Rep3	Actin	Plau	31.106
KSS49_7	Parental_U0126	Rep1	Actin	Plaur	28.278
KSS49_7	Parental_U0126	Rep2	Actin	Plaur	28.004
KSS49_7	Parental_U0126	Rep3	Actin	Plaur	28.031
KSS49_7	Parental_U0126	Rep1	Actin	Timp1	28.022
KSS49_7	Parental_U0126	Rep2	Actin	Timp1	27.836
KSS49_7	Parental_U0126	Rep3	Actin	Timp1	28.169
KSS49_7	Parental_U0126	Rep1	Actin	Cd44	24.428
KSS49_7	Parental_U0126	Rep2	Actin	Cd44	24.575
KSS49_7	Parental_U0126	Rep3	Actin	Cd44	24.533
KSS49_7	shNf1_U0126	Rep1	Actin	Actin	18.817
KSS49_7	shNf1_U0126	Rep2	Actin	Actin	18.695
KSS49_7	shNf1_U0126	Rep3	Actin	Actin	18.91
KSS49_7	shNf1_U0126	Rep1	Actin	Fosl1	28.408
KSS49_7	shNf1_U0126	Rep2	Actin	Fosl1	28.127
KSS49_7	shNf1_U0126	Rep3	Actin	Fosl1	28.347
KSS49_7	shNf1_U0126	Rep1	Actin	Plau	30.379
KSS49_7	shNf1_U0126	Rep2	Actin	Plau	30.391
KSS49_7	shNf1_U0126	Rep3	Actin	Plau	30.456
KSS49_7	shNf1_U0126	Rep1	Actin	Plaur	27.321
KSS49_7	shNf1_U0126	Rep2	Actin	Plaur	27.226
KSS49_7	shNf1_U0126	Rep3	Actin	Plaur	27.168
KSS49_7	shNf1_U0126	Rep1	Actin	Timp1	25.78
KSS49_7	shNf1_U0126	Rep2	Actin	Timp1	26.008
KSS49_7	shNf1_U0126	Rep3	Actin	Timp1	25.797
KSS49_7	shNf1_U0126	Rep1	Actin	Cd44	23.245
KSS49_7	shNf1_U0126	Rep2	Actin	Cd44	23.179
KSS49_7	shNf1_U0126	Rep3	Actin	Cd44	23.194
KSS49_7	KrasG12V_U0126	Rep1	Actin	Actin	18.93
KSS49_7	KrasG12V_U0126	Rep2	Actin	Actin	18.789
KSS49_7	KrasG12V_U0126	Rep3	Actin	Actin	18.945
KSS49_7	KrasG12V_U0126	Rep1	Actin	Fosl1	28.282
KSS49_7	KrasG12V_U0126	Rep2	Actin	Fosl1	28.282
KSS49_7	KrasG12V_U0126	Rep3	Actin	Fosl1	28.207
KSS49_7	KrasG12V_U0126	Rep1	Actin	Plau	29.73
KSS49_7	KrasG12V_U0126	Rep2	Actin	Plau	29.737
KSS49_7	KrasG12V_U0126	Rep3	Actin	Plau	29.338
KSS49_7	KrasG12V_U0126	Rep1	Actin	Plaur	27.212
KSS49_7	KrasG12V_U0126	Rep2	Actin	Plaur	27.037
KSS49_7	KrasG12V_U0126	Rep3	Actin	Plaur	26.972
KSS49_7	KrasG12V_U0126	Rep1	Actin	Timp1	25.329
KSS49_7	KrasG12V_U0126	Rep2	Actin	Timp1	25.265
KSS49_7	KrasG12V_U0126	Rep3	Actin	Timp1	25.28
KSS49_7	KrasG12V_U0126	Rep1	Actin	Cd44	23.545
KSS49_7	KrasG12V_U0126	Rep2	Actin	Cd44	23.553
KSS49_7	KrasG12V_U0126	Rep3	Actin	Cd44	23.513

## Sheet: Figure2-S3F
# Source data Figure 2-figure supplement 3F
NAME	TYPE	SIZE	ES	NES	NOM p-val	FDR q-val	FWER p-val	RANK AT MAX	LEADING EDGE	Experiment
WANG_CL_2017	Non-MES	47	0.366061	1.30396	0.122004	0.47207	0.682	5216	tags=23%, list=21%, signal=30%	NSCs_shNF1_sgFosl1
VERHAAK_PN_2010	Non-MES	143	0.296648	0.922823	0.553648	0.863634	0.991	6116	tags=45%, list=25%, signal=60%	NSCs_shNF1_sgFosl1
PHILLIPS_PROLIFERATIVE_2006	Non-MES	157	0.44753	0.909376	0.695391	0.765878	0.991	6737	tags=61%, list=28%, signal=83%	NSCs_shNF1_sgFosl1
PHILLIPS_PN_2006	Non-MES	214	0.310066	0.833883	0.744681	0.709193	0.994	4988	tags=38%, list=20%, signal=48%	NSCs_shNF1_sgFosl1
RICHARDS_DEV_2021	Non-MES	2653	-0.2523	-0.888527	0.798839	0.672208	1	3513	tags=12%, list=14%, signal=12%	NSCs_shNF1_sgFosl1
VERHAAK_NEU_2010	Non-MES	112	-0.30427	-0.947373	0.542857	0.643606	0.991	1023	tags=7%, list=4%, signal=7%	NSCs_shNF1_sgFosl1
OLIG2_REGULON	Non-MES	140	-0.289257	-1.1324	0.227357	0.363437	0.949	3493	tags=13%, list=14%, signal=15%	NSCs_shNF1_sgFosl1
WANG_PN_2017	Non-MES	45	-0.446724	-1.14496	0.22549	0.366234	0.943	2251	tags=22%, list=9%, signal=24%	NSCs_shNF1_sgFosl1
SCHMITT_HMG_2020	MES	275	-0.357372	-1.15157	0.188889	0.376856	0.934	3609	tags=20%, list=15%, signal=23%	NSCs_shNF1_sgFosl1
SCHMITT_TNF_2020	MES	286	-0.410459	-1.32357	0.0723141	0.147131	0.628	4436	tags=28%, list=18%, signal=34%	NSCs_shNF1_sgFosl1
VERHAAK_MES_2010	MES	185	-0.49387	-1.32367	0.0752688	0.159142	0.628	3928	tags=36%, list=16%, signal=43%	NSCs_shNF1_sgFosl1
RICHARDS_INJ_2021	MES	3554	-0.446299	-1.35999	0.0327198	0.131852	0.522	3954	tags=24%, list=16%, signal=25%	NSCs_shNF1_sgFosl1
WANG_MES_2017	MES	48	-0.643454	-1.43289	0.0351648	0.0778635	0.341	2758	tags=44%, list=11%, signal=49%	NSCs_shNF1_sgFosl1
PHILLIPS_MES_2006	MES	112	-0.498599	-1.43519	0.0430328	0.0826119	0.332	4423	tags=38%, list=18%, signal=46%	NSCs_shNF1_sgFosl1
VERHAAK_CL_2010	Non-MES	135	-0.369275	-1.46705	0.0146751	0.0784864	0.282	5364	tags=27%, list=22%, signal=34%	NSCs_shNF1_sgFosl1
FOSL1_REGULON	MES	208	-0.521436	-1.51206	0.0340426	0.10422	0.176	3883	tags=29%, list=16%, signal=35%	NSCs_shNF1_sgFosl1

## Sheet: Figure2-S3G
# Source data Figure 2-figure supplement 3G
Cells	Sample	Replicate	Normalizer	Gene	CT	Figure
KSS49_7_shNf1	sgCtrl	Rep1	Gapdh	Gapdh	27.292	left
KSS49_7_shNf1	sgCtrl	Rep2	Gapdh	Gapdh	27.149	left
KSS49_7_shNf1	sgCtrl	Rep3	Gapdh	Gapdh	27.021	left
KSS49_7_shNf1	sgCtrl	Rep1	Gapdh	Plaur	17.406	left
KSS49_7_shNf1	sgCtrl	Rep2	Gapdh	Plaur	17.435	left
KSS49_7_shNf1	sgCtrl	Rep3	Gapdh	Plaur	17.41	left
KSS49_7_shNf1	sgCtrl	Rep1	Gapdh	Plau	26.067	left
KSS49_7_shNf1	sgCtrl	Rep2	Gapdh	Plau	26.262	left
KSS49_7_shNf1	sgCtrl	Rep3	Gapdh	Plau	26.04	left
KSS49_7_shNf1	sgCtrl	Rep1	Gapdh	Timp1	23.645	left
KSS49_7_shNf1	sgCtrl	Rep2	Gapdh	Timp2	23.607	left
KSS49_7_shNf1	sgCtrl	Rep3	Gapdh	Timp3	23.209	left
KSS49_7_shNf1	sgCtrl	Rep1	Gapdh	Cd44	28.146	left
KSS49_7_shNf1	sgCtrl	Rep2	Gapdh	Cd44	27.924	left
KSS49_7_shNf1	sgCtrl	Rep3	Gapdh	Cd44	28.052	left
KSS49_7_shNf1	sgCtrl	Rep1	Gapdh	Itga7	21.655	left
KSS49_7_shNf1	sgCtrl	Rep2	Gapdh	Itga7	21.849	left
KSS49_7_shNf1	sgCtrl	Rep3	Gapdh	Itga7	21.868	left
KSS49_7_shNf1	sgCtrl	Rep1	Gapdh	Fn1	23.564	left
KSS49_7_shNf1	sgCtrl	Rep2	Gapdh	Fn1	23.497	left
KSS49_7_shNf1	sgCtrl	Rep3	Gapdh	Fn1	23.586	left
KSS49_7_shNf1	sgCtrl	Rep1	Gapdh	Cyr61	27.386	left
KSS49_7_shNf1	sgCtrl	Rep2	Gapdh	Cyr61	27.737	left
KSS49_7_shNf1	sgCtrl	Rep3	Gapdh	Cyr61	27.423	left
KSS49_7_shNf1	sgFosl1_1	Rep1	Gapdh	Gapdh	26.444	left
KSS49_7_shNf1	sgFosl1_1	Rep2	Gapdh	Gapdh	26.419	left
KSS49_7_shNf1	sgFosl1_1	Rep3	Gapdh	Gapdh	26.173	left
KSS49_7_shNf1	sgFosl1_1	Rep1	Gapdh	Plaur	17.317	left
KSS49_7_shNf1	sgFosl1_1	Rep2	Gapdh	Plaur	17.429	left
KSS49_7_shNf1	sgFosl1_1	Rep3	Gapdh	Plaur	17.228	left
KSS49_7_shNf1	sgFosl1_1	Rep1	Gapdh	Plau	26.375	left
KSS49_7_shNf1	sgFosl1_1	Rep2	Gapdh	Plau	26.424	left
KSS49_7_shNf1	sgFosl1_1	Rep3	Gapdh	Plau	26.766	left
KSS49_7_shNf1	sgFosl1_1	Rep1	Gapdh	Timp1	23.328	left
KSS49_7_shNf1	sgFosl1_1	Rep2	Gapdh	Timp2	23.035	left
KSS49_7_shNf1	sgFosl1_1	Rep3	Gapdh	Timp3	24.117	left
KSS49_7_shNf1	sgFosl1_1	Rep1	Gapdh	Cd44	27.241	left
KSS49_7_shNf1	sgFosl1_1	Rep2	Gapdh	Cd44	27.448	left
KSS49_7_shNf1	sgFosl1_1	Rep3	Gapdh	Cd44	27.189	left
KSS49_7_shNf1	sgFosl1_1	Rep1	Gapdh	Itga7	21.782	left
KSS49_7_shNf1	sgFosl1_1	Rep2	Gapdh	Itga7	21.689	left
KSS49_7_shNf1	sgFosl1_1	Rep3	Gapdh	Itga7	21.476	left
KSS49_7_shNf1	sgFosl1_1	Rep1	Gapdh	Fn1	23.511	left
KSS49_7_shNf1	sgFosl1_1	Rep2	Gapdh	Fn1	23.517	left
KSS49_7_shNf1	sgFosl1_1	Rep3	Gapdh	Fn1	23.829	left
KSS49_7_shNf1	sgFosl1_1	Rep1	Gapdh	Cyr61	28.691	left
KSS49_7_shNf1	sgFosl1_1	Rep2	Gapdh	Cyr61	28.979	left
KSS49_7_shNf1	sgFosl1_1	Rep3	Gapdh	Cyr61	28.925	left
KSS49_7_shNf1	sgFosl1_3	Rep1	Gapdh	Gapdh	26.022	left
KSS49_7_shNf1	sgFosl1_3	Rep2	Gapdh	Gapdh	25.832	left
KSS49_7_shNf1	sgFosl1_3	Rep3	Gapdh	Gapdh	25.924	left
KSS49_7_shNf1	sgFosl1_3	Rep1	Gapdh	Plaur	17.67	left
KSS49_7_shNf1	sgFosl1_3	Rep2	Gapdh	Plaur	17.821	left
KSS49_7_shNf1	sgFosl1_3	Rep3	Gapdh	Plaur	17.53	left
KSS49_7_shNf1	sgFosl1_3	Rep1	Gapdh	Plau	26.271	left
KSS49_7_shNf1	sgFosl1_3	Rep2	Gapdh	Plau	26.226	left
KSS49_7_shNf1	sgFosl1_3	Rep3	Gapdh	Plau	26.476	left
KSS49_7_shNf1	sgFosl1_3	Rep1	Gapdh	Timp1	24.235	left
KSS49_7_shNf1	sgFosl1_3	Rep2	Gapdh	Timp2	23.683	left
KSS49_7_shNf1	sgFosl1_3	Rep3	Gapdh	Timp3	23.474	left
KSS49_7_shNf1	sgFosl1_3	Rep1	Gapdh	Cd44	27.074	left
KSS49_7_shNf1	sgFosl1_3	Rep2	Gapdh	Cd44	27.038	left
KSS49_7_shNf1	sgFosl1_3	Rep3	Gapdh	Cd44	27.021	left
KSS49_7_shNf1	sgFosl1_3	Rep1	Gapdh	Itga7	21.437	left
KSS49_7_shNf1	sgFosl1_3	Rep2	Gapdh	Itga7	21.715	left
KSS49_7_shNf1	sgFosl1_3	Rep3	Gapdh	Itga7	21.302	left
KSS49_7_shNf1	sgFosl1_3	Rep1	Gapdh	Fn1	23.332	left
KSS49_7_shNf1	sgFosl1_3	Rep2	Gapdh	Fn1	23.285	left
KSS49_7_shNf1	sgFosl1_3	Rep3	Gapdh	Fn1	23.427	left
KSS49_7_shNf1	sgFosl1_3	Rep1	Gapdh	Cyr61	27.686	left
KSS49_7_shNf1	sgFosl1_3	Rep2	Gapdh	Cyr61	27.721	left
KSS49_7_shNf1	sgFosl1_3	Rep3	Gapdh	Cyr61	28.147	left
KSS49_7_shNf1	sgCtrl	Rep1	Gapdh	Gapdh	17.407	right
KSS49_7_shNf1	sgCtrl	Rep2	Gapdh	Gapdh	17.438	right
KSS49_7_shNf1	sgCtrl	Rep3	Gapdh	Gapdh	17.352	right
KSS49_7_shNf1	sgCtrl	Rep1	Gapdh	Dll3	31.875	right
KSS49_7_shNf1	sgCtrl	Rep2	Gapdh	Dll3	31.917	right
KSS49_7_shNf1	sgCtrl	Rep3	Gapdh	Dll3	32.763	right
KSS49_7_shNf1	sgCtrl	Rep1	Gapdh	Lgr5	25.47	right
KSS49_7_shNf1	sgCtrl	Rep2	Gapdh	Lgr5	25.424	right
KSS49_7_shNf1	sgCtrl	Rep3	Gapdh	Lgr5	25.519	right
KSS49_7_shNf1	sgCtrl	Rep1	Gapdh	Naan1	27.265	right
KSS49_7_shNf1	sgCtrl	Rep2	Gapdh	Naan1	27.109	right
KSS49_7_shNf1	sgCtrl	Rep3	Gapdh	Naan1	27.232	right
KSS49_7_shNf1	sgCtrl	Rep1	Gapdh	Olig2	21.349	right
KSS49_7_shNf1	sgCtrl	Rep2	Gapdh	Olig2	21.385	right
KSS49_7_shNf1	sgCtrl	Rep3	Gapdh	Olig2	21.432	right
KSS49_7_shNf1	sgFosl1_1	Rep1	Gapdh	Gapdh	17.576	right
KSS49_7_shNf1	sgFosl1_1	Rep2	Gapdh	Gapdh	17.714	right
KSS49_7_shNf1	sgFosl1_1	Rep3	Gapdh	Gapdh	17.703	right
KSS49_7_shNf1	sgFosl1_1	Rep1	Gapdh	Dll3	31.446	right
KSS49_7_shNf1	sgFosl1_1	Rep2	Gapdh	Dll3	31.876	right
KSS49_7_shNf1	sgFosl1_1	Rep3	Gapdh	Dll3	31.167	right
KSS49_7_shNf1	sgFosl1_1	Rep1	Gapdh	Lgr5	24.931	right
KSS49_7_shNf1	sgFosl1_1	Rep2	Gapdh	Lgr5	24.977	right
KSS49_7_shNf1	sgFosl1_1	Rep3	Gapdh	Lgr5	24.892	right
KSS49_7_shNf1	sgFosl1_1	Rep1	Gapdh	Naan1	28.115	right
KSS49_7_shNf1	sgFosl1_1	Rep2	Gapdh	Naan1	28.312	right
KSS49_7_shNf1	sgFosl1_1	Rep3	Gapdh	Naan1	27.789	right
KSS49_7_shNf1	sgFosl1_1	Rep1	Gapdh	Olig2	21.309	right
KSS49_7_shNf1	sgFosl1_1	Rep2	Gapdh	Olig2	21.373	right
KSS49_7_shNf1	sgFosl1_1	Rep3	Gapdh	Olig2	21.39	right
KSS49_7_shNf1	sgFosl1_3	Rep1	Gapdh	Gapdh	17.817	right
KSS49_7_shNf1	sgFosl1_3	Rep2	Gapdh	Gapdh	17.731	right
KSS49_7_shNf1	sgFosl1_3	Rep3	Gapdh	Gapdh	17.72	right
KSS49_7_shNf1	sgFosl1_3	Rep1	Gapdh	Dll3	31.217	right
KSS49_7_shNf1	sgFosl1_3	Rep2	Gapdh	Dll3	30.847	right
KSS49_7_shNf1	sgFosl1_3	Rep3	Gapdh	Dll3	NA	right
KSS49_7_shNf1	sgFosl1_3	Rep1	Gapdh	Lgr5	24.869	right
KSS49_7_shNf1	sgFosl1_3	Rep2	Gapdh	Lgr5	24.932	right
KSS49_7_shNf1	sgFosl1_3	Rep3	Gapdh	Lgr5	24.825	right
KSS49_7_shNf1	sgFosl1_3	Rep1	Gapdh	Naan1	28.345	right
KSS49_7_shNf1	sgFosl1_3	Rep2	Gapdh	Naan1	28.697	right
KSS49_7_shNf1	sgFosl1_3	Rep3	Gapdh	Naan1	28.798	right
KSS49_7_shNf1	sgFosl1_3	Rep1	Gapdh	Olig2	21.529	right
KSS49_7_shNf1	sgFosl1_3	Rep2	Gapdh	Olig2	21.499	right
KSS49_7_shNf1	sgFosl1_3	Rep3	Gapdh	Olig2	21.482	right
