# Supplementary material for: NF1 regulates mesenchymal glioblastoma plasticity and aggressiveness through the AP-1 transcription factor FOSL1
Source: eLife. 2021 Aug 17;10:e64846. doi: 10.7554/eLife.64846 (PMC8370767; doi:10.7554/eLife.64846)
Supplement: Figure 2—source data 2. [file elife-64846-fig2-data2.xlsx]

## Sheet: Figure_2A
# Source Data Figure_2A
Sample	Developmental_ssGSEA	Injury_ssGSEA	Classical_ssGSEA	Mesenchymal_ssGSEA	Proneural_ssGSEA	Wang_2017	Richards_2021	NF1_status
TCGA-06-0744	2824.23	1584.93	6931.38	1650.47	53.7197	CL	DEV	Altered
TCGA-06-5408	2602.41	2099.63	7034.93	3070.03	636.872	CL	DEV	Altered
TCGA-08-0386	2537.18	2040.9	7113.32	2154.61	-303.842	CL	DEV	Altered
TCGA-12-3653	2572.79	1876.76	8013.89	912.61	-1532.43	CL	DEV	Altered
TCGA-CS-5397	2827.28	2135.67	7601.82	1097.26	693.814	CL	DEV	Altered
TCGA-DB-A64O	2926.96	1853.01	7526.57	-194.69	92.08	CL	DEV	Altered
TCGA-HT-7860	2827.15	2086.29	8343.23	484.816	-1229.53	CL	DEV	Altered
TCGA-HT-A617	2763.96	2041.32	7636.95	2169.75	-59.0173	CL	DEV	Altered
TCGA-QH-A6CS	2638.36	1990.54	7370.35	256.392	-280.883	CL	DEV	Altered
TCGA-S9-A7IX	2946.73	2008.69	7407.49	856.14	426.43	CL	DEV	Altered
TCGA-TQ-A7RP	2671.83	2069.98	7487.53	157.311	202.315	CL	DEV	Altered
TCGA-02-2485	2914.19	1822.12	7312.44	1760.06	621.673	CL	DEV	NotAltered
TCGA-06-0125	2864.15	1889.53	7852.87	3048.76	-196.98	CL	DEV	NotAltered
TCGA-06-0157	2826.45	1902.52	7434.48	2294.95	280.506	CL	DEV	NotAltered
TCGA-06-0158	2663.76	2150.69	7406.85	2545.5	-154.789	CL	DEV	NotAltered
TCGA-06-0211	2809.1	1766.84	7584.54	1502.49	-574.832	CL	DEV	NotAltered
TCGA-06-0743	2662.56	1854.27	7159.9	2720.49	-663.255	CL	DEV	NotAltered
TCGA-06-0747	2515.52	1996.23	7760.19	2272.26	-937.078	CL	DEV	NotAltered
TCGA-06-1804	2702.07	1915.62	7318.42	645.256	-790.095	CL	DEV	NotAltered
TCGA-06-2557	2656.4	1987.09	7070.12	2327.3	357.525	CL	DEV	NotAltered
TCGA-06-2563	2616.19	1961.52	7748.66	1629.98	-1491.32	CL	DEV	NotAltered
TCGA-06-2565	2821.89	1841.05	7601.03	2053.78	-841.914	CL	DEV	NotAltered
TCGA-06-5415	2919.86	1778.25	7741.58	1349.92	418.15	CL	DEV	NotAltered
TCGA-12-3652	2612.23	1700.14	6624.13	2143.17	-679.8	CL	DEV	NotAltered
TCGA-14-0790	2857.63	1696.41	7955.09	215.423	-474.068	CL	DEV	NotAltered
TCGA-15-0742	2914.03	1572.38	7312.84	2015.1	-361.884	CL	DEV	NotAltered
TCGA-19-2619	2923.21	1917.43	7696.76	2712.18	-533.739	CL	DEV	NotAltered
TCGA-19-5960	3218.86	1335.26	6890.39	-228.158	698.138	CL	DEV	NotAltered
TCGA-27-1835	2644.77	1731.05	8076.28	372.381	-1483.43	CL	DEV	NotAltered
TCGA-27-2523	2928.98	1537.34	6810.75	1704.46	258.473	CL	DEV	NotAltered
TCGA-28-1747	2645.42	2016.24	7279.94	678.947	733.312	CL	DEV	NotAltered
TCGA-28-2514	3046.79	1881.35	7116.32	1793.73	1005.28	CL	DEV	NotAltered
TCGA-28-5204	2519.74	2047.81	7166.61	1998.39	-370.761	CL	DEV	NotAltered
TCGA-28-5209	2551.78	2109.12	7563.25	3112.79	-654.793	CL	DEV	NotAltered
TCGA-28-5220	2247.4	2037.54	6095.93	712.5	-416.49	CL	DEV	NotAltered
TCGA-32-1970	2897.15	1784.69	7571.72	319.855	375.278	CL	DEV	NotAltered
TCGA-41-2572	2453.79	2066.79	7398.98	2748.05	-1353.09	CL	DEV	NotAltered
TCGA-76-4925	2431.04	1920.34	7275.24	2661.08	-701.687	CL	DEV	NotAltered
TCGA-76-4926	2493.87	2096.13	6956.32	1304.7	-768.953	CL	DEV	NotAltered
TCGA-76-4931	2929.09	1712.36	7119.92	1911.13	328.039	CL	DEV	NotAltered
TCGA-CS-4941	2747.76	2011.39	7831.33	655.39	-334.899	CL	DEV	NotAltered
TCGA-CS-5395	3030.43	1685.7	7725.86	-835.12	495.614	CL	DEV	NotAltered
TCGA-CS-6186	2943.76	1551.65	8374.02	-772.677	-1048.61	CL	DEV	NotAltered
TCGA-DB-A75P	3112.38	1826.61	7290.68	174.685	1017.4	CL	DEV	NotAltered
TCGA-DU-5852	2982.73	1848.11	7466.27	935.107	893.245	CL	DEV	NotAltered
TCGA-DU-5854	2612.51	2189.71	7747.25	1709.51	-52.9694	CL	DEV	NotAltered
TCGA-DU-6404	2948.81	1755.57	7099.62	1087.3	734.262	CL	DEV	NotAltered
TCGA-DU-6405	2905.72	1798.68	7888.07	657.508	-634.967	CL	DEV	NotAltered
TCGA-DU-6406	3053.67	1676.63	7934.47	708.889	-259.466	CL	DEV	NotAltered
TCGA-DU-7013	3093.96	1632.28	7217.85	355.726	699.158	CL	DEV	NotAltered
TCGA-DU-7292	3203.91	1721.28	7221.32	-279.094	1235.33	CL	DEV	NotAltered
TCGA-DU-A5TT	2651.01	1926.39	6843.75	654.856	-394.644	CL	DEV	NotAltered
TCGA-DU-A76K	3293.39	1492.34	7434.49	-650.851	595.352	CL	DEV	NotAltered
TCGA-DU-A7TD	2885.96	1904.64	7096.93	1235.2	437.382	CL	DEV	NotAltered
TCGA-DU-A7TJ	2867.71	1783.61	7749.37	1433.68	-569.454	CL	DEV	NotAltered
TCGA-E1-A7YJ	2546.8	1955.51	7528.19	740.084	-732.155	CL	DEV	NotAltered
TCGA-E1-A7YM	3007.87	1563.76	7115.61	-808.564	799.133	CL	DEV	NotAltered
TCGA-E1-A7Z2	3130.36	1480.43	7283.06	-952.291	621.571	CL	DEV	NotAltered
TCGA-FG-6692	2573.35	1922.97	7381.07	2030.13	-1032.86	CL	DEV	NotAltered
TCGA-FG-A4MU	2611.66	2157.23	7521.95	3688.53	-1102.44	CL	DEV	NotAltered
TCGA-FG-A87Q	2726.33	2088.53	7667.81	644.845	247.304	CL	DEV	NotAltered
TCGA-HT-7469	3013.94	1323.7	7425.36	-488.228	-30.3334	CL	DEV	NotAltered
TCGA-HT-8104	2807.93	1994.24	7656.36	606.362	620.509	CL	DEV	NotAltered
TCGA-HT-8110	2583.66	2128.58	7212.05	1276.49	-7.56614	CL	DEV	NotAltered
TCGA-HT-A5RC	2633.85	2077	7943.76	1389.33	-833.57	CL	DEV	NotAltered
TCGA-HW-A5KK	2685.62	2123.78	6957.54	597.803	868.743	CL	DEV	NotAltered
TCGA-KT-A7W1	2832.61	1806.18	7989.96	549.996	-405.071	CL	DEV	NotAltered
TCGA-P5-A5EY	3132.58	1793.28	7383.47	-716.472	1395.99	CL	DEV	NotAltered
TCGA-QH-A6CV	2743.95	1659.47	7786.84	1237.57	-239.725	CL	DEV	NotAltered
TCGA-QH-A6XC	3218.79	1552.46	7760.99	-359.904	775.773	CL	DEV	NotAltered
TCGA-S9-A6WM	2843.91	1758.03	7845.31	1001.51	-993.346	CL	DEV	NotAltered
TCGA-TM-A7C3	2981.2	1607.59	8094.31	107.02	-977.455	CL	DEV	NotAltered
TCGA-TM-A84B	3090.09	1493.97	7928.72	7.86868	554.7	CL	DEV	NotAltered
TCGA-VW-A8FI	2951.29	1548.13	7386.61	375.846	668.526	CL	DEV	NotAltered
TCGA-06-0646	2648.4	2188.25	5872.98	4053.54	1540.02	MES	DEV	NotAltered
TCGA-06-0745	2637.92	1833.13	5891.38	3429.55	657.051	MES	DEV	NotAltered
TCGA-12-0821	2453.67	2017.19	6228.49	2514.3	337.048	MES	DEV	NotAltered
TCGA-E1-A7YL	2541.33	2028.7	6342.91	3754.14	129.513	MES	DEV	NotAltered
TCGA-26-5133	2618.8	1702.66	5510.08	1786.28	1816.95	PN	DEV	Altered
TCGA-41-5651	3250.92	1381.59	5156.29	1211.95	4420.08	PN	DEV	Altered
TCGA-DH-5140	3407.56	1316.1	5718.11	836.997	3989.58	PN	DEV	Altered
TCGA-FG-5963	2668.16	2057.33	5753.97	1898.79	1828.42	PN	DEV	Altered
TCGA-HT-8564	3320.21	1579.52	7061.72	-206.369	1555.61	PN	DEV	Altered
TCGA-HT-A4DS	2770.27	1674.55	6308.33	490.493	1195.16	PN	DEV	Altered
TCGA-S9-A89V	3328.5	1631.49	6408.52	-101.124	2814.86	PN	DEV	Altered
TCGA-06-0174	3110.87	1584.81	6046.41	2650.38	3716.36	PN	DEV	NotAltered
TCGA-06-0238	2637.22	1912.48	4414.58	2662.09	3869.31	PN	DEV	NotAltered
TCGA-06-0686	2867.21	1750.09	4906.05	2714.98	3949.79	PN	DEV	NotAltered
TCGA-06-0749	2619.8	1971.38	6044.7	1084.96	715.709	PN	DEV	NotAltered
TCGA-06-2558	2832.93	1912.32	5456.86	2736.18	2813.02	PN	DEV	NotAltered
TCGA-06-2559	2817.26	1915.99	6093.55	2947.14	1413.64	PN	DEV	NotAltered
TCGA-06-5411	2876.93	1881.65	5194.96	2518.42	2736.26	PN	DEV	NotAltered
TCGA-06-5856	2609.06	2006.98	6854.26	2592.06	1361.99	PN	DEV	NotAltered
TCGA-12-0616	2550.7	1854.3	4851.11	2540.16	2942.16	PN	DEV	NotAltered
TCGA-12-0618	3297.76	1406.62	5321.21	1169.1	3636.14	PN	DEV	NotAltered
TCGA-12-3650	3104.48	1407.23	6389.16	1414.7	1397.96	PN	DEV	NotAltered
TCGA-14-1825	2842.4	1545.33	4946.24	1549.31	3771.63	PN	DEV	NotAltered
TCGA-16-0846	2678.05	2182.45	6038.01	1305.71	2755.46	PN	DEV	NotAltered
TCGA-19-1390	3211.93	1271.71	5086.08	1242.17	3720.83	PN	DEV	NotAltered
TCGA-19-2624	3354.98	1300.4	6189.66	1102.48	2626.47	PN	DEV	NotAltered
TCGA-26-5134	2958.64	1602.09	5542.36	2183.03	3902.12	PN	DEV	NotAltered
TCGA-26-5135	2847.82	1974.29	5801.68	3398.83	2146.04	PN	DEV	NotAltered
TCGA-27-1837	2808.48	1956.63	6841.22	1874.61	1166.29	PN	DEV	NotAltered
TCGA-28-2510	3056.58	1969.29	6278.92	2165.37	1839.66	PN	DEV	NotAltered
TCGA-28-5207	2665.12	2121.67	6935.32	1331.07	960.871	PN	DEV	NotAltered
TCGA-32-2634	2826.05	1834.49	5870.15	2588.61	2820.45	PN	DEV	NotAltered
TCGA-41-2571	3125.86	1420.59	4514.31	2369.87	3504.81	PN	DEV	NotAltered
TCGA-76-4929	2570.02	1986.3	5640.17	2371.39	1360.24	PN	DEV	NotAltered
TCGA-DU-6403	3256.23	1539.17	5931.55	84.5472	3257.01	PN	DEV	NotAltered
TCGA-DU-8162	3279.53	1764.74	6871.91	-511.252	1884.87	PN	DEV	NotAltered
TCGA-DU-A7TB	3134.61	1403.74	5359.33	-533.179	3366.42	PN	DEV	NotAltered
TCGA-E1-A7YD	2893.29	1553.08	7107.62	-451.536	1764.1	PN	DEV	NotAltered
TCGA-FG-7643	3204.42	1818.13	7085.83	-118.717	1666.08	PN	DEV	NotAltered
TCGA-FG-A4MW	3148.51	1655.71	7037.46	591.607	1950.4	PN	DEV	NotAltered
TCGA-FG-A70Z	2972.22	1940.89	6872.9	1940.54	1770.83	PN	DEV	NotAltered
TCGA-HT-8011	2892.24	1524.77	6300.89	391.145	888.61	PN	DEV	NotAltered
TCGA-HT-8015	3147.19	1863.86	6428.23	-131.297	1912.67	PN	DEV	NotAltered
TCGA-HT-8019	3348.06	1505.48	6059.6	-1138.61	2338.55	PN	DEV	NotAltered
TCGA-HT-8107	3354.85	1704.66	6236.83	-683.938	2123.63	PN	DEV	NotAltered
TCGA-HT-A61C	2796.09	1824.35	5392.51	2801.65	2158.94	PN	DEV	NotAltered
TCGA-HT-A74H	2681.87	1962.68	6522.89	586.929	685.636	PN	DEV	NotAltered
TCGA-S9-A7R2	2636.32	2004.25	6624.1	545.835	586.9	PN	DEV	NotAltered
TCGA-TM-A84J	3397.94	1300.99	5029.89	1406.32	3835.32	PN	DEV	NotAltered
TCGA-CS-6669	3312.35	1533.25	5969.38	-1550.57	2487.98	PN	DEV	NA
TCGA-DU-6392	3173.03	1690.71	4824.03	2069.84	3237.73	PN	DEV	NA
TCGA-FG-8181	3197.3	1779.77	6004.87	247.288	2127.77	PN	DEV	NA
TCGA-HT-8558	3297.95	1551.3	5779.67	-1299.53	2640.82	PN	DEV	NA
TCGA-06-0882	2270.92	2559.74	7154.35	3058.03	-753.289	CL	INJ	Altered
TCGA-28-5208	2359.82	2212.35	6805.55	2692.37	-199.903	CL	INJ	Altered
TCGA-DU-5847	2531.07	2200.89	7554.6	1723.71	-840.45	CL	INJ	Altered
TCGA-DU-8161	2625.98	2251.73	7833.84	1415.28	-206.264	CL	INJ	Altered
TCGA-QH-A6CX	2464.27	2149.14	7270.86	779.467	-359.603	CL	INJ	Altered
TCGA-VM-A8CD	2605.24	2240.36	7730.63	1296.09	-239.285	CL	INJ	Altered
TCGA-06-2561	2371.81	2430.04	6909.49	2446.93	-917.244	CL	INJ	NotAltered
TCGA-06-2564	2556.31	2208.31	7272.24	2317.66	-604.754	CL	INJ	NotAltered
TCGA-06-5414	2213.9	2346.35	7514.38	3525	-1432.1	CL	INJ	NotAltered
TCGA-06-5859	2367.93	2096.34	6518.5	1299.32	-11.0954	CL	INJ	NotAltered
TCGA-14-0787	2423.55	2083.25	7162.91	2947.09	-1027.66	CL	INJ	NotAltered
TCGA-19-2620	2586.29	2214.24	7612.43	3080.92	-217.631	CL	INJ	NotAltered
TCGA-27-2526	2139.19	2156.92	6999.67	1876.69	-1285.27	CL	INJ	NotAltered
TCGA-27-2528	2433.27	2211.08	7453.42	3000.71	-929.802	CL	INJ	NotAltered
TCGA-CS-6188	2492.09	2276.3	7733.89	2127.55	-715.319	CL	INJ	NotAltered
TCGA-DU-7012	2297.32	2645.81	7123.29	3177.04	-1011.27	CL	INJ	NotAltered
TCGA-DU-A5TY	2538.72	2188.75	7352.68	1779.84	-208.338	CL	INJ	NotAltered
TCGA-FG-6688	2486.4	2199.44	6775.71	1400	97.5366	CL	INJ	NotAltered
TCGA-HT-7680	2306.99	2335.94	7014.58	917.208	-1556.14	CL	INJ	NotAltered
TCGA-HT-7691	2540.49	2209.98	6849.09	1734.11	641.82	CL	INJ	NotAltered
TCGA-HT-7854	2623.98	2245.99	7227.69	706.333	-172.344	CL	INJ	NotAltered
TCGA-HT-A5RA	2363.01	2247.32	7495.05	2461.16	-1363.48	CL	INJ	NotAltered
TCGA-P5-A72U	2391.7	2326.28	7961.16	2701.26	-1457.57	CL	INJ	NotAltered
TCGA-02-0055	617.554	3984.06	4424.6	7405.12	-956.958	MES	INJ	Altered
TCGA-06-0130	682.495	3707.73	4591.36	6339.88	-1191.44	MES	INJ	Altered
TCGA-06-0184	1974.32	2562.94	6720.97	3631.8	-735.5	MES	INJ	Altered
TCGA-06-0187	2270.26	2404.24	7212.6	3865.05	-1691.35	MES	INJ	Altered
TCGA-06-0190	1715.74	3102.57	6390.91	6366.5	-555.257	MES	INJ	Altered
TCGA-06-0210	1995.41	2639.85	6235.52	5075.31	-835.216	MES	INJ	Altered
TCGA-06-0644	846.531	3621.2	5376.47	6479.48	-994.17	MES	INJ	Altered
TCGA-06-2562	2081.73	2703.92	6707.73	4670.32	-1251.47	MES	INJ	Altered
TCGA-06-2569	1367.01	2621.09	4686.68	3689.02	464.094	MES	INJ	Altered
TCGA-06-5410	1331.79	3293.45	5380.06	6710.49	-547.06	MES	INJ	Altered
TCGA-12-0619	1899.05	2790.12	5808.92	5145.09	-371.92	MES	INJ	Altered
TCGA-14-0789	1892.79	2933.3	6541.59	5767.96	-1129.26	MES	INJ	Altered
TCGA-28-2509	1792.49	2556.94	6519.81	4640.88	-1528.49	MES	INJ	Altered
TCGA-41-4097	2151.65	2840.83	6954.78	4823.66	-752	MES	INJ	Altered
TCGA-DU-6402	1883.61	2710.67	7142.66	3966.49	-1487.88	MES	INJ	Altered
TCGA-DU-7006	2199.31	2559.8	6976.75	3316.31	695.088	MES	INJ	Altered
TCGA-DU-8165	2038.23	2388.68	6417.89	2795.96	-699.673	MES	INJ	Altered
TCGA-DU-A76L	2400.01	2509.63	5760.47	4225.16	820.634	MES	INJ	Altered
TCGA-HT-7857	1849.58	2950.4	5453.07	4424.48	-189.954	MES	INJ	Altered
TCGA-P5-A5F6	1275.14	2744.75	4743.21	2999.93	-361.976	MES	INJ	Altered
TCGA-TM-A84C	2335.57	2446.73	6684.06	3078.05	-154.885	MES	INJ	Altered
TCGA-02-2486	1360.74	2991.77	5409.4	4963.44	-1624.95	MES	INJ	NotAltered
TCGA-06-0132	2326.95	2630.47	5699.35	4493.67	693.146	MES	INJ	NotAltered
TCGA-06-0141	1822.06	2913.46	5999.64	5587.06	-246.097	MES	INJ	NotAltered
TCGA-06-0168	2203.86	2559.84	6461.1	4944.03	-140.492	MES	INJ	NotAltered
TCGA-06-0645	2098.63	2751.83	6062.21	5745.15	-220.058	MES	INJ	NotAltered
TCGA-06-0649	2170.79	2461.16	5768.23	4229.56	375.42	MES	INJ	NotAltered
TCGA-06-0750	2060.49	2541.52	5850.94	4615.68	-840.522	MES	INJ	NotAltered
TCGA-06-0878	2124.3	2594.91	6898.08	4760.48	-1583.59	MES	INJ	NotAltered
TCGA-06-2567	2220.94	2306.14	6746.07	2736.68	-650.496	MES	INJ	NotAltered
TCGA-06-5412	1587.84	3062.44	6287.81	5688.83	-1488.43	MES	INJ	NotAltered
TCGA-06-5413	2430.44	2221.48	5831.67	4284.37	1066.2	MES	INJ	NotAltered
TCGA-06-5418	2311.84	2272.76	6478.56	4038.83	-1245.74	MES	INJ	NotAltered
TCGA-06-5858	2137.05	2432.36	6592.59	3372.14	-359.267	MES	INJ	NotAltered
TCGA-12-5295	2062.8	2116.37	6298.31	2219.45	-705.165	MES	INJ	NotAltered
TCGA-12-5299	2288.35	2348.08	6737.6	4131.15	-474.339	MES	INJ	NotAltered
TCGA-14-0781	1672.11	3034.77	6462.44	5561.02	-1378.3	MES	INJ	NotAltered
TCGA-14-0817	2078.53	2323.28	5617.2	3612.52	601.818	MES	INJ	NotAltered
TCGA-14-1823	1628.55	2731.29	5693.86	4879.97	-1640.6	MES	INJ	NotAltered
TCGA-14-1829	1940.75	2399.83	4941.19	4293.66	571.22	MES	INJ	NotAltered
TCGA-14-2554	2056.75	2457.48	6765.22	3571.96	-1375.36	MES	INJ	NotAltered
TCGA-16-1045	2201.68	2697.06	6851.71	4731.34	-1098.85	MES	INJ	NotAltered
TCGA-19-2625	2118.31	2247.13	6506.43	3751.11	-1335.64	MES	INJ	NotAltered
TCGA-26-5132	2276.76	2136.88	6565.12	3113.8	-733.489	MES	INJ	NotAltered
TCGA-26-5136	2076.16	2306.62	6099.27	2678.28	-236.436	MES	INJ	NotAltered
TCGA-26-5139	2386.08	2343	7202.98	3931.53	-1302.48	MES	INJ	NotAltered
TCGA-27-1830	2310.78	2493.06	5528.03	4432.77	1394.61	MES	INJ	NotAltered
TCGA-27-1831	1766	2532.87	6126.43	3892.05	-1346.55	MES	INJ	NotAltered
TCGA-27-1832	1570.23	2977.51	5792.21	5510.65	-1330.67	MES	INJ	NotAltered
TCGA-27-2519	2219.76	2367.53	5800.99	3402.11	188.138	MES	INJ	NotAltered
TCGA-27-2524	1873.01	2611.9	5474.69	5803.86	-98.5084	MES	INJ	NotAltered
TCGA-28-1753	2581.63	2327.8	6666.1	4598.81	1373.86	MES	INJ	NotAltered
TCGA-28-2513	1753.66	2919.33	6278.25	6157.32	-1540.99	MES	INJ	NotAltered
TCGA-28-5213	1454.14	2914.24	5463.29	5806.69	-1381.49	MES	INJ	NotAltered
TCGA-28-5218	876.492	3415.23	4542.5	6311.63	-448.068	MES	INJ	NotAltered
TCGA-32-1980	2468.35	2509.6	5980.57	3384.31	799.485	MES	INJ	NotAltered
TCGA-32-1982	2223.82	2430.27	6852.66	3320.93	-798.406	MES	INJ	NotAltered
TCGA-32-2615	2304.74	2425.29	6832.83	4750.74	-1357	MES	INJ	NotAltered
TCGA-32-2632	2030.37	2515.93	6889.58	3008.97	-1238.19	MES	INJ	NotAltered
TCGA-32-4213	1998.71	2614.11	5869.45	4998.04	785.316	MES	INJ	NotAltered
TCGA-32-5222	2336.77	2096.24	6730.7	2618.45	-317.463	MES	INJ	NotAltered
TCGA-41-3915	2159.95	2539.36	5576.29	5287.56	1187	MES	INJ	NotAltered
TCGA-76-4928	1745.25	2913.94	6208.47	5023.91	-229.66	MES	INJ	NotAltered
TCGA-DU-7290	2063.88	2554.36	6575.52	2663.88	-1245.95	MES	INJ	NotAltered
TCGA-E1-A7YN	2170.2	2728.97	6421.39	2753.18	-583.339	MES	INJ	NotAltered
TCGA-E1-A7YQ	2353.16	2389.67	6898.86	3583.19	-1015.75	MES	INJ	NotAltered
TCGA-HT-7882	1281.97	3714.11	5969.79	6815.21	-1252.55	MES	INJ	NotAltered
TCGA-S9-A6U0	2082.23	2624.65	6793.69	3049.99	224.039	MES	INJ	NotAltered
TCGA-06-0138	2451.84	2111.15	6105.83	4184.97	1130.56	MES	INJ	NA
TCGA-02-0047	2610.65	2330.11	5976.23	3246.61	1874.19	PN	INJ	NotAltered
TCGA-06-0219	2210.78	2044.07	5578.84	2252.18	414.98	PN	INJ	NotAltered
TCGA-27-1834	2353.36	2340.39	6059.78	1971.17	521.667	PN	INJ	NotAltered
TCGA-DU-8158	2606.19	2335.15	6242.82	1755.5	1759.3	PN	INJ	NotAltered
TCGA-VM-A8C9	2353.81	2245.33	5344.05	2522.11	1184.92	PN	INJ	NotAltered
TCGA-14-1034	1995.65	2665.32	7487.64	4481.43	-1546.71	NA	INJ	Altered
TCGA-S9-A6UA	2265.32	2570.87	5421.35	4131.66	2016.56	NA	INJ	Altered
TCGA-28-5215	2479.47	2365.9	5497.4	4081.21	3081.42	NA	INJ	NotAltered
TCGA-28-5216	2394.56	2300.21	5067.11	4171.36	2821.11	NA	INJ	NotAltered
TCGA-32-2638	2403.96	2395.7	7643.48	3969.84	-1574.59	NA	INJ	NotAltered

## Sheet: Figure_2C-D
# Source Data Figure_2C-D
Sample	NF1_status	FOSL1	NF1
TCGA-02-0047	NotAltered	6.07674	11.3156
TCGA-02-0055	Altered	11.0184	9.00727
TCGA-02-2485	NotAltered	6.86654	10.6803
TCGA-02-2486	NotAltered	8.82899	10.0352
TCGA-06-0125	NotAltered	6.80905	10.9274
TCGA-06-0130	Altered	9.6975	10.0104
TCGA-06-0132	NotAltered	6.41856	10.3829
TCGA-06-0141	NotAltered	8.27635	9.40211
TCGA-06-0157	NotAltered	4.83473	10.5646
TCGA-06-0158	NotAltered	6.77762	11.0224
TCGA-06-0168	NotAltered	5.30344	10.2643
TCGA-06-0174	NotAltered	6.31602	10.7542
TCGA-06-0184	Altered	6.98347	8.97076
TCGA-06-0187	Altered	8.68867	10.4097
TCGA-06-0190	Altered	8.32815	10.0175
TCGA-06-0210	Altered	9.70389	9.8817
TCGA-06-0211	NotAltered	6.06182	10.7538
TCGA-06-0219	NotAltered	6.43662	9.80885
TCGA-06-0238	NotAltered	5.2029	9.85234
TCGA-06-0644	Altered	10.5736	9.85902
TCGA-06-0645	NotAltered	7.67133	10.1469
TCGA-06-0646	NotAltered	7.04388	10.7888
TCGA-06-0649	NotAltered	6.35965	10.7166
TCGA-06-0686	NotAltered	7.25317	10.0877
TCGA-06-0743	NotAltered	6.3313	10.3877
TCGA-06-0744	Altered	6.38671	10.1577
TCGA-06-0745	NotAltered	7.44316	10.2515
TCGA-06-0747	NotAltered	8.63664	10.9709
TCGA-06-0749	NotAltered	5.64351	10.116
TCGA-06-0750	NotAltered	8.24731	10.0493
TCGA-06-0878	NotAltered	8.05246	10.9859
TCGA-06-0882	Altered	8.76517	9.61
TCGA-06-1804	NotAltered	4.40805	11.1419
TCGA-06-2557	NotAltered	4.94574	10.6501
TCGA-06-2558	NotAltered	6.06967	10.8616
TCGA-06-2559	NotAltered	7.41354	11.404
TCGA-06-2561	NotAltered	7.54673	11.1858
TCGA-06-2562	Altered	8.951	9.70916
TCGA-06-2563	NotAltered	6.57542	10.8557
TCGA-06-2564	NotAltered	6.94158	11.2466
TCGA-06-2565	NotAltered	6.32205	11.4299
TCGA-06-2567	NotAltered	6.70333	10.945
TCGA-06-2569	Altered	4.61887	9.57148
TCGA-06-5408	Altered	8.12992	10.8413
TCGA-06-5410	Altered	8.47536	9.83819
TCGA-06-5411	NotAltered	6.63644	10.114
TCGA-06-5412	NotAltered	8.67999	9.15931
TCGA-06-5413	NotAltered	6.35532	10.3117
TCGA-06-5414	NotAltered	7.84304	10.9034
TCGA-06-5415	NotAltered	7.18465	10.9417
TCGA-06-5418	NotAltered	7.90216	10.6448
TCGA-06-5856	NotAltered	5.70054	10.3391
TCGA-06-5858	NotAltered	7.32216	10.9919
TCGA-06-5859	NotAltered	4.5379	11.1906
TCGA-08-0386	Altered	7.6083	10.8036
TCGA-12-0616	NotAltered	6.04087	9.96716
TCGA-12-0618	NotAltered	6.4673	10.8067
TCGA-12-0619	Altered	8.12471	10.0093
TCGA-12-0821	NotAltered	6.06033	10.761
TCGA-12-3650	NotAltered	5.0828	9.86949
TCGA-12-3652	NotAltered	7.95378	9.74454
TCGA-12-3653	Altered	5.48333	10.5256
TCGA-12-5295	NotAltered	6.04831	9.51568
TCGA-12-5299	NotAltered	9.6117	10.4406
TCGA-14-0781	NotAltered	9.29386	9.394
TCGA-14-0787	NotAltered	8.71157	10.4396
TCGA-14-0789	Altered	8.87997	9.46377
TCGA-14-0790	NotAltered	5.32518	10.5853
TCGA-14-0817	NotAltered	5.73413	9.65291
TCGA-14-1034	Altered	7.15934	8.82014
TCGA-14-1823	NotAltered	6.38838	10.2432
TCGA-14-1825	NotAltered	5.51256	10.3515
TCGA-14-1829	NotAltered	5.94907	9.72455
TCGA-14-2554	NotAltered	7.38237	10.6489
TCGA-15-0742	NotAltered	7.5816	10.4188
TCGA-16-0846	NotAltered	6.22879	10.6815
TCGA-16-1045	NotAltered	5.5616	10.9724
TCGA-19-1390	NotAltered	5.24594	11.3624
TCGA-19-2619	NotAltered	7.98295	11.1352
TCGA-19-2620	NotAltered	8.23736	10.9648
TCGA-19-2624	NotAltered	7.65412	10.9522
TCGA-19-2625	NotAltered	8.34751	10.6257
TCGA-19-5960	NotAltered	4.52148	11.6148
TCGA-26-5132	NotAltered	7.83913	10.5313
TCGA-26-5133	Altered	5.54381	8.73091
TCGA-26-5134	NotAltered	5.80291	11.0879
TCGA-26-5135	NotAltered	8.31675	10.513
TCGA-26-5136	NotAltered	8.10334	10.5764
TCGA-26-5139	NotAltered	9.28245	10.9338
TCGA-27-1830	NotAltered	6.82018	11.0575
TCGA-27-1831	NotAltered	7.51476	10.1716
TCGA-27-1832	NotAltered	8.53109	10.4555
TCGA-27-1834	NotAltered	6.4325	10.9911
TCGA-27-1835	NotAltered	6.1187	11.4441
TCGA-27-1837	NotAltered	6.99333	10.672
TCGA-27-2519	NotAltered	8.40987	10.7773
TCGA-27-2523	NotAltered	7.42943	10.8836
TCGA-27-2524	NotAltered	10.226	7.83717
TCGA-27-2526	NotAltered	8.00066	9.64374
TCGA-27-2528	NotAltered	7.70388	10.8777
TCGA-28-1747	NotAltered	6.04373	10.8039
TCGA-28-1753	NotAltered	6.61522	10.5476
TCGA-28-2509	Altered	8.5916	9.12571
TCGA-28-2510	NotAltered	6.34161	10.7531
TCGA-28-2513	NotAltered	7.61643	10.3452
TCGA-28-2514	NotAltered	7.48593	11.2625
TCGA-28-5204	NotAltered	6.83276	10.5883
TCGA-28-5207	NotAltered	3.80743	10.7839
TCGA-28-5208	Altered	7.21885	9.13023
TCGA-28-5209	NotAltered	6.46289	10.9291
TCGA-28-5213	NotAltered	7.40461	9.36312
TCGA-28-5215	NotAltered	6.16181	11.1028
TCGA-28-5216	NotAltered	7.03238	10.3478
TCGA-28-5218	NotAltered	5.66579	10.8392
TCGA-28-5220	NotAltered	3.50632	10.4028
TCGA-32-1970	NotAltered	6.50934	11.0079
TCGA-32-1980	NotAltered	7.75778	10.1862
TCGA-32-1982	NotAltered	6.05325	10.1456
TCGA-32-2615	NotAltered	9.7491	10.7297
TCGA-32-2632	NotAltered	6.87847	10.1819
TCGA-32-2634	NotAltered	5.74676	10.9907
TCGA-32-2638	NotAltered	7.81094	10.8851
TCGA-32-4213	NotAltered	7.32139	10.2643
TCGA-32-5222	NotAltered	7.13721	10.0414
TCGA-41-2571	NotAltered	7.20655	9.85136
TCGA-41-2572	NotAltered	6.53352	9.94268
TCGA-41-3915	NotAltered	7.50509	11.0207
TCGA-41-4097	Altered	8.71264	9.44892
TCGA-41-5651	Altered	5.11398	10.5138
TCGA-76-4925	NotAltered	7.76981	11.1227
TCGA-76-4926	NotAltered	7.65489	11.1786
TCGA-76-4928	NotAltered	9.06135	10.2804
TCGA-76-4929	NotAltered	6.86587	11.023
TCGA-76-4931	NotAltered	7.79231	10.7283
TCGA-CS-4941	NotAltered	4.81277	11.2289
TCGA-CS-5395	NotAltered	2.76435	11.9567
TCGA-CS-5397	Altered	6.82959	10.773
TCGA-CS-6186	NotAltered	5.23464	12.1186
TCGA-CS-6188	NotAltered	6.8291	11.7021
TCGA-DB-A64O	Altered	6.51164	10.0316
TCGA-DB-A75P	NotAltered	6.83847	10.9988
TCGA-DH-5140	Altered	4.4732	11.9509
TCGA-DU-5847	Altered	6.81444	10.4889
TCGA-DU-5852	NotAltered	6.25392	11.5678
TCGA-DU-5854	NotAltered	5.96431	11.5908
TCGA-DU-6402	Altered	9.66606	9.39555
TCGA-DU-6403	NotAltered	3.63391	11.5677
TCGA-DU-6404	NotAltered	7.42467	11.4191
TCGA-DU-6405	NotAltered	6.83254	11.6624
TCGA-DU-6406	NotAltered	6.78571	11.6076
TCGA-DU-7006	Altered	7.70455	10.2757
TCGA-DU-7012	NotAltered	5.17138	11.3673
TCGA-DU-7013	NotAltered	4.3652	12.5616
TCGA-DU-7290	NotAltered	6.90443	11.2817
TCGA-DU-7292	NotAltered	4.99095	11.7393
TCGA-DU-8158	NotAltered	4.90312	11.5565
TCGA-DU-8161	Altered	6.93988	9.64901
TCGA-DU-8162	NotAltered	4.85204	11.8632
TCGA-DU-8165	Altered	3.50918	11.2117
TCGA-DU-A5TT	NotAltered	6.80097	10.5584
TCGA-DU-A5TY	NotAltered	6.12339	10.9063
TCGA-DU-A76K	NotAltered	4.29108	11.0434
TCGA-DU-A76L	Altered	7.22051	10.2948
TCGA-DU-A7TB	NotAltered	2.9501	11.2569
TCGA-DU-A7TD	NotAltered	5.45068	11.6622
TCGA-DU-A7TJ	NotAltered	5.85764	11.6885
TCGA-E1-A7YD	NotAltered	4.62987	11.2932
TCGA-E1-A7YJ	NotAltered	7.65577	10.9991
TCGA-E1-A7YL	NotAltered	5.93379	10.9402
TCGA-E1-A7YM	NotAltered	2.15095	11.0104
TCGA-E1-A7YN	NotAltered	7.59181	10.8673
TCGA-E1-A7YQ	NotAltered	6.12484	10.9476
TCGA-E1-A7Z2	NotAltered	5.16102	10.801
TCGA-FG-5963	Altered	5.60007	10.6858
TCGA-FG-6688	NotAltered	8.13313	10.9971
TCGA-FG-6692	NotAltered	7.01542	10.8459
TCGA-FG-7643	NotAltered	6.35897	11.5517
TCGA-FG-A4MU	NotAltered	6.99845	11.1219
TCGA-FG-A4MW	NotAltered	4.90969	10.8503
TCGA-FG-A70Z	NotAltered	5.52261	11.0486
TCGA-FG-A87Q	NotAltered	6.4462	11.2544
TCGA-HT-7469	NotAltered	6.00017	12.4071
TCGA-HT-7680	NotAltered	5.48831	12.2098
TCGA-HT-7691	NotAltered	8.23963	11.5634
TCGA-HT-7854	NotAltered	7.03232	11.7816
TCGA-HT-7857	Altered	8.78644	10.3752
TCGA-HT-7860	Altered	5.24656	11.3257
TCGA-HT-7882	NotAltered	10.2163	10.9057
TCGA-HT-8011	NotAltered	5.40793	11.488
TCGA-HT-8015	NotAltered	5.44378	11.5492
TCGA-HT-8019	NotAltered	2.25966	11.4085
TCGA-HT-8104	NotAltered	6.17017	11.5866
TCGA-HT-8107	NotAltered	6.38411	11.917
TCGA-HT-8110	NotAltered	5.14209	11.1113
TCGA-HT-8564	Altered	4.80744	11.1552
TCGA-HT-A4DS	Altered	7.06404	8.70025
TCGA-HT-A5RA	NotAltered	7.53507	11.2845
TCGA-HT-A5RC	NotAltered	7.28145	11.3897
TCGA-HT-A617	Altered	7.02619	9.28439
TCGA-HT-A61C	NotAltered	7.7997	10.3397
TCGA-HT-A74H	NotAltered	3.86374	10.628
TCGA-HW-A5KK	NotAltered	6.69637	10.9753
TCGA-KT-A7W1	NotAltered	7.78339	11.1529
TCGA-P5-A5EY	NotAltered	4.45474	11.5942
TCGA-P5-A5F6	Altered	5.15073	10.406
TCGA-P5-A72U	NotAltered	6.18143	10.7979
TCGA-QH-A6CS	Altered	4.45402	9.79409
TCGA-QH-A6CV	NotAltered	5.73815	10.1985
TCGA-QH-A6CX	Altered	5.80438	10.7554
TCGA-QH-A6XC	NotAltered	6.54343	10.2818
TCGA-S9-A6U0	NotAltered	6.22139	10.451
TCGA-S9-A6UA	Altered	7.35432	9.78979
TCGA-S9-A6WM	NotAltered	5.21447	10.8756
TCGA-S9-A7IX	Altered	6.07777	11.1826
TCGA-S9-A7R2	NotAltered	3.95735	10.95
TCGA-S9-A89V	Altered	5.32155	10.9836
TCGA-TM-A7C3	NotAltered	5.25023	11.4386
TCGA-TM-A84B	NotAltered	3.46588	11.5521
TCGA-TM-A84C	Altered	8.73633	9.57897
TCGA-TM-A84J	NotAltered	5.2338	11.5756
TCGA-TQ-A7RP	Altered	5.56601	10.2077
TCGA-VM-A8C9	NotAltered	5.91537	10.1933
TCGA-VM-A8CD	Altered	9.24606	9.46689
TCGA-VW-A8FI	NotAltered	7.55173	10.8697

## Sheet: Figure_2E
# Source Data Figure_2E
Cells	Sample	Replicate	Normalizer	Gene	CT
BTSC 233	Ctrl	Rep1	18s	18s	14.835
BTSC 233	Ctrl	Rep2	18s	18s	14.768
BTSC 233	Ctrl	Rep3	18s	18s	14.639
BTSC 233	GRD	Rep1	18s	18s	15.072
BTSC 233	GRD	Rep2	18s	18s	14.961
BTSC 233	GRD	Rep3	18s	18s	15.275
BTSC 233	Ctrl	Rep1	18s	FOSL1	27.918
BTSC 233	Ctrl	Rep2	18s	FOSL1	27.906
BTSC 233	Ctrl	Rep3	18s	FOSL1	28.028
BTSC 233	GRD	Rep1	18s	FOSL1	29.948
BTSC 233	GRD	Rep2	18s	FOSL1	29.903
BTSC 233	GRD	Rep3	18s	FOSL1	29.716
BTSC 232	Ctrl	Rep1	18s	18s	10.711
BTSC 232	Ctrl	Rep2	18s	18s	10.568
BTSC 232	Ctrl	Rep3	18s	18s	10.521
BTSC 232	GRD	Rep1	18s	18s	10.752
BTSC 232	GRD	Rep2	18s	18s	10.727
BTSC 232	GRD	Rep3	18s	18s	10.917
BTSC 232	Ctrl	Rep1	18s	FOSL1	27.377
BTSC 232	Ctrl	Rep2	18s	FOSL1	27.506
BTSC 232	Ctrl	Rep3	18s	FOSL1	27.497
BTSC 232	GRD	Rep1	18s	FOSL1	28.551
BTSC 232	GRD	Rep2	18s	FOSL1	28.565
BTSC 232	GRD	Rep3	18s	FOSL1	28.707

## Sheet: Figure_2G
# Source Data Figure_2G
NAME	TYPE	SIZE	ES	NES	NOM p-val	FDR q-val	FWER p-val	RANK AT MAX	LEADING EDGE	Experiment
VERHAAK_PN_2010	Non-MES	168	0.42768	1.92295	0	0.00111654	0.002	3673	tags=32%, list=17%, signal=38%	BTSC233_NF1_GRD
WANG_CL_2017	Non-MES	50	0.447689	1.59604	0.0125261	0.0120039	0.079	4538	tags=34%, list=21%, signal=43%	BTSC233_NF1_GRD
RICHARDS_DEV_2021	Non-MES	2907	0.24525	1.35737	0	0.0867889	0.494	3970	tags=23%, list=18%, signal=24%	BTSC233_NF1_GRD
PHILLIPS_PN_2006	Non-MES	226	0.286247	1.31876	0.024948	0.103174	0.592	1884	tags=16%, list=9%, signal=17%	BTSC233_NF1_GRD
PHILLIPS_PROLIFERATIVE_2006	Non-MES	177	0.294458	1.29694	0.040568	0.109444	0.657	3297	tags=23%, list=15%, signal=27%	BTSC233_NF1_GRD
WANG_PN_2017	Non-MES	50	0.338945	1.25395	0.127451	0.136979	0.76	3053	tags=24%, list=14%, signal=28%	BTSC233_NF1_GRD
VERHAAK_CL_2010	Non-MES	157	0.286418	1.24686	0.0645161	0.133525	0.783	3939	tags=27%, list=18%, signal=33%	BTSC233_NF1_GRD
OLIG2_REGULON	Non-MES	144	0.261903	1.13106	0.192547	0.245324	0.966	1643	tags=15%, list=8%, signal=16%	BTSC233_NF1_GRD
VERHAAK_NEU_2010	Non-MES	127	-0.186739	-0.806895	0.89	0.87538	1	6557	tags=35%, list=30%, signal=51%	BTSC233_NF1_GRD
WANG_MES_2017	MES	50	-0.373511	-1.33976	0.0831643	0.0637943	0.543	2125	tags=20%, list=10%, signal=22%	BTSC233_NF1_GRD
SCHMITT_HMG_2020	MES	276	-0.305342	-1.43677	0.00200803	0.0340935	0.299	3319	tags=24%, list=15%, signal=28%	BTSC233_NF1_GRD
RICHARDS_INJ_2021	MES	3632	-0.27705	-1.54157	0	0.0155268	0.132	3045	tags=19%, list=14%, signal=18%	BTSC233_NF1_GRD
SCHMITT_TNF_2020	MES	304	-0.360912	-1.71179	0	0.00390417	0.022	3055	tags=27%, list=14%, signal=31%	BTSC233_NF1_GRD
PHILLIPS_MES_2006	MES	125	-0.414621	-1.757	0	0.00405731	0.014	2024	tags=27%, list=9%, signal=30%	BTSC233_NF1_GRD
VERHAAK_MES_2010	MES	213	-0.417417	-1.89664	0	0.00141842	0.004	2835	tags=28%, list=13%, signal=32%	BTSC233_NF1_GRD
FOSL1_REGULON	MES	219	-0.577444	-2.62747	0	0	0	2125	tags=37%, list=10%, signal=41%	BTSC233_NF1_GRD

## Sheet: Figure_2H
# Source Data Figure_2H
Cells	Sample	Replicate	Normalizer	Gene	CT_norm_value
BTSC 3021	shCtrl	Rep1	18s	FOSL1	1.093
BTSC 3021	shCtrl	Rep2	18s	FOSL1	0.979
BTSC 3021	shCtrl	Rep3	18s	FOSL1	0.926
BTSC 3021	shNF1_1	Rep1	18s	FOSL1	1.931
BTSC 3021	shNF1_1	Rep2	18s	FOSL1	1.786
BTSC 3021	shNF1_1	Rep3	18s	FOSL1	2.135
BTSC 3021	shNF1_5	Rep1	18s	FOSL1	1.767
BTSC 3021	shNF1_5	Rep2	18s	FOSL1	1.825
BTSC 3021	shNF1_5	Rep3	18s	FOSL1	1.619
BTSC 3047	shCtrl	Rep1	18s	FOSL1	1.091
BTSC 3047	shCtrl	Rep2	18s	FOSL1	0.901
BTSC 3047	shCtrl	Rep3	18s	FOSL1	1.007
BTSC 3047	shNF1_4	Rep1	18s	FOSL1	1.656
BTSC 3047	shNF1_4	Rep2	18s	FOSL1	1.64
BTSC 3047	shNF1_4	Rep3	18s	FOSL1	1.814
BTSC 3047	shNF1_5	Rep1	18s	FOSL1	1.657
BTSC 3047	shNF1_5	Rep2	18s	FOSL1	1.771
BTSC 3047	shNF1_5	Rep3	18s	FOSL1	1.877

## Sheet: Figure_2I
# Source Data Figure_2I
NAME	TYPE	SIZE	ES	NES	NOM p-val	FDR q-val	FWER p-val	RANK AT MAX	LEADING EDGE	Experiment
FOSL1_REGULON	MES	219	0.434426	2.13733	0	0	0	2034	tags=25%, list=9%, signal=27%	BTSC3021_shNF1
PHILLIPS_MES_2006	MES	125	0.417528	1.8971	0	0.000308	0.001	3202	tags=32%, list=15%, signal=37%	BTSC3021_shNF1
PHILLIPS_PROLIFERATIVE_2006	Non-MES	177	0.37314	1.78316	0	0.00175425	0.008	3471	tags=31%, list=16%, signal=36%	BTSC3021_shNF1
WANG_MES_2017	MES	50	0.430204	1.66113	0.00904977	0.00454716	0.03	3084	tags=24%, list=14%, signal=28%	BTSC3021_shNF1
RICHARDS_INJ_2021	MES	3632	0.263577	1.56232	0	0.0116306	0.088	4322	tags=25%, list=20%, signal=26%	BTSC3021_shNF1
VERHAAK_MES_2010	MES	213	0.306021	1.49811	0	0.0182484	0.152	3133	tags=24%, list=15%, signal=28%	BTSC3021_shNF1
WANG_PN_2017	Non-MES	50	-0.271763	-1.02164	0.42576	0.446822	1	6805	tags=38%, list=32%, signal=55%	BTSC3021_shNF1
WANG_CL_2017	Non-MES	50	-0.284376	-1.03664	0.388278	0.432349	1	1136	tags=14%, list=5%, signal=15%	BTSC3021_shNF1
SCHMITT_TNF_2020	MES	304	-0.219845	-1.06424	0.273021	0.412745	0.999	3459	tags=19%, list=16%, signal=22%	BTSC3021_shNF1
VERHAAK_CL_2010	Non-MES	157	-0.240732	-1.0742	0.302632	0.417499	0.999	2702	tags=17%, list=13%, signal=19%	BTSC3021_shNF1
VERHAAK_NEU_2010	Non-MES	127	-0.252623	-1.09771	0.259067	0.386583	0.998	5507	tags=31%, list=25%, signal=42%	BTSC3021_shNF1
SCHMITT_HMG_2020	MES	276	-0.249684	-1.19262	0.092562	0.245803	0.939	2255	tags=16%, list=10%, signal=17%	BTSC3021_shNF1
VERHAAK_PN_2010	Non-MES	168	-0.317415	-1.44211	0.00507614	0.0395394	0.315	3456	tags=21%, list=16%, signal=25%	BTSC3021_shNF1
PHILLIPS_PN_2006	Non-MES	226	-0.329463	-1.53538	0	0.016571	0.136	1876	tags=14%, list=9%, signal=15%	BTSC3021_shNF1
RICHARDS_DEV_2021	Non-MES	2907	-0.309601	-1.73237	0	0.00286547	0.019	4814	tags=29%, list=22%, signal=32%	BTSC3021_shNF1
OLIG2_REGULON	Non-MES	144	-0.403991	-1.78014	0	0.00189935	0.011	2413	tags=26%, list=11%, signal=30%	BTSC3021_shNF1

## Sheet: Figure_2J
# Source Data Figure_2J
Cells	Sample	Replicate	Normalizer	Gene	CT
BTSC 232	Ctrl+Ctrl	Rep1	18s	18s	10.934
BTSC 232	Ctrl+Ctrl	Rep2	18s	18s	10.672
BTSC 232	Ctrl+Ctrl	Rep3	18s	18s	10.819
BTSC 232	Ctrl+FOSL1	Rep1	18s	18s	10.64
BTSC 232	Ctrl+FOSL1	Rep2	18s	18s	10.608
BTSC 232	Ctrl+FOSL1	Rep3	18s	18s	10.52
BTSC 232	GRD+Ctrl	Rep1	18s	18s	10.481
BTSC 232	GRD+Ctrl	Rep2	18s	18s	10.427
BTSC 232	GRD+Ctrl	Rep3	18s	18s	10.628
BTSC 232	GRD+FOSL1	Rep1	18s	18s	10.891
BTSC 232	GRD+FOSL1	Rep2	18s	18s	10.577
BTSC 232	GRD+FOSL1	Rep3	18s	18s	10.814
BTSC 232	Ctrl+Ctrl	Rep1	18s	FOSL1	25.607
BTSC 232	Ctrl+Ctrl	Rep2	18s	FOSL1	25.281
BTSC 232	Ctrl+Ctrl	Rep3	18s	FOSL1	25.384
BTSC 232	Ctrl+FOSL1	Rep1	18s	FOSL1	20.344
BTSC 232	Ctrl+FOSL1	Rep2	18s	FOSL1	20.404
BTSC 232	Ctrl+FOSL1	Rep3	18s	FOSL1	20.246
BTSC 232	GRD+Ctrl	Rep1	18s	FOSL1	25.925
BTSC 232	GRD+Ctrl	Rep2	18s	FOSL1	25.799
BTSC 232	GRD+Ctrl	Rep3	18s	FOSL1	25.933
BTSC 232	GRD+FOSL1	Rep1	18s	FOSL1	20.845
BTSC 232	GRD+FOSL1	Rep2	18s	FOSL1	20.889
BTSC 232	GRD+FOSL1	Rep3	18s	FOSL1	20.774
BTSC 232	Ctrl+Ctrl	Rep1	18s	ITGA5	28.492
BTSC 232	Ctrl+Ctrl	Rep2	18s	ITGA5	27.78
BTSC 232	Ctrl+Ctrl	Rep3	18s	ITGA5	27.965
BTSC 232	Ctrl+FOSL1	Rep1	18s	ITGA5	26.934
BTSC 232	Ctrl+FOSL1	Rep2	18s	ITGA5	27.289
BTSC 232	Ctrl+FOSL1	Rep3	18s	ITGA5	26.945
BTSC 232	GRD+Ctrl	Rep1	18s	ITGA5	28.362
BTSC 232	GRD+Ctrl	Rep2	18s	ITGA5	28.104
BTSC 232	GRD+Ctrl	Rep3	18s	ITGA5	28.756
BTSC 232	GRD+FOSL1	Rep1	18s	ITGA5	28.679
BTSC 232	GRD+FOSL1	Rep2	18s	ITGA5	27.969
BTSC 232	GRD+FOSL1	Rep3	18s	ITGA5	28.474
BTSC 232	Ctrl+Ctrl	Rep1	18s	ITGA3	27.255
BTSC 232	Ctrl+Ctrl	Rep2	18s	ITGA3	27.065
BTSC 232	Ctrl+Ctrl	Rep3	18s	ITGA3	27.444
BTSC 232	Ctrl+FOSL1	Rep1	18s	ITGA3	25.821
BTSC 232	Ctrl+FOSL1	Rep2	18s	ITGA3	25.934
BTSC 232	Ctrl+FOSL1	Rep3	18s	ITGA3	25.841
BTSC 232	GRD+Ctrl	Rep1	18s	ITGA3	28.406
BTSC 232	GRD+Ctrl	Rep2	18s	ITGA3	28.329
BTSC 232	GRD+Ctrl	Rep3	18s	ITGA3	28.546
BTSC 232	GRD+FOSL1	Rep1	18s	ITGA3	27.158
BTSC 232	GRD+FOSL1	Rep2	18s	ITGA3	26.981
BTSC 232	GRD+FOSL1	Rep3	18s	ITGA3	27.23
BTSC 232	Ctrl+Ctrl	Rep1	18s	PLAU	29.809
BTSC 232	Ctrl+Ctrl	Rep2	18s	PLAU	29.471
BTSC 232	Ctrl+Ctrl	Rep3	18s	PLAU	29.532
BTSC 232	Ctrl+FOSL1	Rep1	18s	PLAU	29.35
BTSC 232	Ctrl+FOSL1	Rep2	18s	PLAU	29.543
BTSC 232	Ctrl+FOSL1	Rep3	18s	PLAU	29.585
BTSC 232	GRD+Ctrl	Rep1	18s	PLAU	29.22
BTSC 232	GRD+Ctrl	Rep2	18s	PLAU	28.918
BTSC 232	GRD+Ctrl	Rep3	18s	PLAU	29.402
BTSC 232	GRD+FOSL1	Rep1	18s	PLAU	29.681
BTSC 232	GRD+FOSL1	Rep2	18s	PLAU	29.613
BTSC 232	GRD+FOSL1	Rep3	18s	PLAU	29.684
BTSC 232	Ctrl+Ctrl	Rep1	18s	SERPINE1	23.729
BTSC 232	Ctrl+Ctrl	Rep2	18s	SERPINE1	23.675
BTSC 232	Ctrl+Ctrl	Rep3	18s	SERPINE1	23.649
BTSC 232	Ctrl+FOSL1	Rep1	18s	SERPINE1	22.752
BTSC 232	Ctrl+FOSL1	Rep2	18s	SERPINE1	22.734
BTSC 232	Ctrl+FOSL1	Rep3	18s	SERPINE1	22.671
BTSC 232	GRD+Ctrl	Rep1	18s	SERPINE1	24.647
BTSC 232	GRD+Ctrl	Rep2	18s	SERPINE1	24.628
BTSC 232	GRD+Ctrl	Rep3	18s	SERPINE1	24.683
BTSC 232	GRD+FOSL1	Rep1	18s	SERPINE1	23.783
BTSC 232	GRD+FOSL1	Rep2	18s	SERPINE1	23.907
BTSC 232	GRD+FOSL1	Rep3	18s	SERPINE1	23.916
BTSC 232	Ctrl+Ctrl	Rep1	18s	TNC	22.93
BTSC 232	Ctrl+Ctrl	Rep2	18s	TNC	22.871
BTSC 232	Ctrl+Ctrl	Rep3	18s	TNC	22.74
BTSC 232	Ctrl+FOSL1	Rep1	18s	TNC	22.176
BTSC 232	Ctrl+FOSL1	Rep2	18s	TNC	22.135
BTSC 232	Ctrl+FOSL1	Rep3	18s	TNC	22.12
BTSC 232	GRD+Ctrl	Rep1	18s	TNC	22.797
BTSC 232	GRD+Ctrl	Rep2	18s	TNC	22.75
BTSC 232	GRD+Ctrl	Rep3	18s	TNC	22.733
BTSC 232	GRD+FOSL1	Rep1	18s	TNC	22.543
BTSC 232	GRD+FOSL1	Rep2	18s	TNC	22.549
BTSC 232	GRD+FOSL1	Rep3	18s	TNC	22.549
BTSC 233	Ctrl+Ctrl	Rep1	18s	18s	11.596
BTSC 233	Ctrl+Ctrl	Rep2	18s	18s	11.354
BTSC 233	Ctrl+Ctrl	Rep3	18s	18s	11.453
BTSC 233	Ctrl+FOSL1	Rep1	18s	18s	11.519
BTSC 233	Ctrl+FOSL1	Rep2	18s	18s	11.476
BTSC 233	Ctrl+FOSL1	Rep3	18s	18s	11.383
BTSC 233	GRD+Ctrl	Rep1	18s	18s	11.533
BTSC 233	GRD+Ctrl	Rep2	18s	18s	11.422
BTSC 233	GRD+Ctrl	Rep3	18s	18s	11.505
BTSC 233	GRD+FOSL1	Rep1	18s	18s	11.944
BTSC 233	GRD+FOSL1	Rep2	18s	18s	11.668
BTSC 233	GRD+FOSL1	Rep3	18s	18s	11.931
BTSC 233	Ctrl+Ctrl	Rep1	18s	FOSL1	24.719
BTSC 233	Ctrl+Ctrl	Rep2	18s	FOSL1	24.274
BTSC 233	Ctrl+Ctrl	Rep3	18s	FOSL1	24.396
BTSC 233	Ctrl+FOSL1	Rep1	18s	FOSL1	18.384
BTSC 233	Ctrl+FOSL1	Rep2	18s	FOSL1	18.474
BTSC 233	Ctrl+FOSL1	Rep3	18s	FOSL1	18.349
BTSC 233	GRD+Ctrl	Rep1	18s	FOSL1	24.93
BTSC 233	GRD+Ctrl	Rep2	18s	FOSL1	24.679
BTSC 233	GRD+Ctrl	Rep3	18s	FOSL1	24.93
BTSC 233	GRD+FOSL1	Rep1	18s	FOSL1	19.797
BTSC 233	GRD+FOSL1	Rep2	18s	FOSL1	19.755
BTSC 233	GRD+FOSL1	Rep3	18s	FOSL1	19.632
BTSC 233	Ctrl+Ctrl	Rep1	18s	ITGA5	28.004
BTSC 233	Ctrl+Ctrl	Rep2	18s	ITGA5	27.778
BTSC 233	Ctrl+Ctrl	Rep3	18s	ITGA5	27.936
BTSC 233	Ctrl+FOSL1	Rep1	18s	ITGA5	27.09
BTSC 233	Ctrl+FOSL1	Rep2	18s	ITGA5	27.493
BTSC 233	Ctrl+FOSL1	Rep3	18s	ITGA5	27.094
BTSC 233	GRD+Ctrl	Rep1	18s	ITGA5	28.928
BTSC 233	GRD+Ctrl	Rep2	18s	ITGA5	28.703
BTSC 233	GRD+Ctrl	Rep3	18s	ITGA5	29.211
BTSC 233	GRD+FOSL1	Rep1	18s	ITGA5	28.611
BTSC 233	GRD+FOSL1	Rep2	18s	ITGA5	28.115
BTSC 233	GRD+FOSL1	Rep3	18s	ITGA5	28.511
BTSC 233	Ctrl+Ctrl	Rep1	18s	ITGA3	26.368
BTSC 233	Ctrl+Ctrl	Rep2	18s	ITGA3	26.197
BTSC 233	Ctrl+Ctrl	Rep3	18s	ITGA3	26.402
BTSC 233	Ctrl+FOSL1	Rep1	18s	ITGA3	25.922
BTSC 233	Ctrl+FOSL1	Rep2	18s	ITGA3	25.936
BTSC 233	Ctrl+FOSL1	Rep3	18s	ITGA3	25.784
BTSC 233	GRD+Ctrl	Rep1	18s	ITGA3	27.074
BTSC 233	GRD+Ctrl	Rep2	18s	ITGA3	26.952
BTSC 233	GRD+Ctrl	Rep3	18s	ITGA3	27.118
BTSC 233	GRD+FOSL1	Rep1	18s	ITGA3	26.529
BTSC 233	GRD+FOSL1	Rep2	18s	ITGA3	26.531
BTSC 233	GRD+FOSL1	Rep3	18s	ITGA3	26.465
BTSC 233	Ctrl+Ctrl	Rep1	18s	PLAU	29.416
BTSC 233	Ctrl+Ctrl	Rep2	18s	PLAU	29.24
BTSC 233	Ctrl+Ctrl	Rep3	18s	PLAU	29.263
BTSC 233	Ctrl+FOSL1	Rep1	18s	PLAU	29.603
BTSC 233	Ctrl+FOSL1	Rep2	18s	PLAU	29.7
BTSC 233	Ctrl+FOSL1	Rep3	18s	PLAU	29.636
BTSC 233	GRD+Ctrl	Rep1	18s	PLAU	29.837
BTSC 233	GRD+Ctrl	Rep2	18s	PLAU	29.765
BTSC 233	GRD+Ctrl	Rep3	18s	PLAU	29.929
BTSC 233	GRD+FOSL1	Rep1	18s	PLAU	30.365
BTSC 233	GRD+FOSL1	Rep2	18s	PLAU	30.407
BTSC 233	GRD+FOSL1	Rep3	18s	PLAU	30.49
BTSC 233	Ctrl+Ctrl	Rep1	18s	SERPINE1	22.251
BTSC 233	Ctrl+Ctrl	Rep2	18s	SERPINE1	22.096
BTSC 233	Ctrl+Ctrl	Rep3	18s	SERPINE1	22.21
BTSC 233	Ctrl+FOSL1	Rep1	18s	SERPINE1	21.961
BTSC 233	Ctrl+FOSL1	Rep2	18s	SERPINE1	21.944
BTSC 233	Ctrl+FOSL1	Rep3	18s	SERPINE1	21.925
BTSC 233	GRD+Ctrl	Rep1	18s	SERPINE1	22.793
BTSC 233	GRD+Ctrl	Rep2	18s	SERPINE1	22.802
BTSC 233	GRD+Ctrl	Rep3	18s	SERPINE1	22.833
BTSC 233	GRD+FOSL1	Rep1	18s	SERPINE1	22.276
BTSC 233	GRD+FOSL1	Rep2	18s	SERPINE1	22.37
BTSC 233	GRD+FOSL1	Rep3	18s	SERPINE1	22.311
BTSC 233	Ctrl+Ctrl	Rep1	18s	TNC	22.493
BTSC 233	Ctrl+Ctrl	Rep2	18s	TNC	22.347
BTSC 233	Ctrl+Ctrl	Rep3	18s	TNC	22.27
BTSC 233	Ctrl+FOSL1	Rep1	18s	TNC	21.924
BTSC 233	Ctrl+FOSL1	Rep2	18s	TNC	21.883
BTSC 233	Ctrl+FOSL1	Rep3	18s	TNC	21.869
BTSC 233	GRD+Ctrl	Rep1	18s	TNC	22.484
BTSC 233	GRD+Ctrl	Rep2	18s	TNC	22.409
BTSC 233	GRD+Ctrl	Rep3	18s	TNC	22.407
BTSC 233	GRD+FOSL1	Rep1	18s	TNC	22.085
BTSC 233	GRD+FOSL1	Rep2	18s	TNC	22.124
BTSC 233	GRD+FOSL1	Rep3	18s	TNC	22.142
