# Supplementary material for: NF1 regulates mesenchymal glioblastoma plasticity and aggressiveness through the AP-1 transcription factor FOSL1
Source: eLife. 2021 Aug 17;10:e64846. doi: 10.7554/eLife.64846 (PMC8370767; doi:10.7554/eLife.64846)
Supplement: Figure 3—source data 3. [file elife-64846-fig3-data3.xlsx]

## Sheet: Figure_3B
# Source Data Figure_3B
Cells	Sample	Replicate	Normalizer	Gene	CT
KSS49_7	Parental	Rep1	Gapdh	Gapdh	18.122
KSS49_7	Parental	Rep2	Gapdh	Gapdh	18.01
KSS49_7	Parental	Rep3	Gapdh	Gapdh	17.98
KSS49_7	Parental	Rep1	Gapdh	Fosl1	32.213
KSS49_7	Parental	Rep2	Gapdh	Fosl1	32.656
KSS49_7	Parental	Rep3	Gapdh	Fosl1	32.275
KSS49_7	Parental	Rep1	Gapdh	Plau	30.955
KSS49_7	Parental	Rep2	Gapdh	Plau	30.754
KSS49_7	Parental	Rep3	Gapdh	Plau	30.88
KSS49_7	Parental	Rep1	Gapdh	Plaur	30.939
KSS49_7	Parental	Rep2	Gapdh	Plaur	30.796
KSS49_7	Parental	Rep3	Gapdh	Plaur	31.239
KSS49_7	Parental	Rep1	Gapdh	Timp1	28.921
KSS49_7	Parental	Rep2	Gapdh	Timp1	28.69
KSS49_7	Parental	Rep3	Gapdh	Timp1	28.656
KSS49_7	Parental	Rep1	Gapdh	Cd44	25.386
KSS49_7	Parental	Rep2	Gapdh	Cd44	25.119
KSS49_7	Parental	Rep3	Gapdh	Cd44	25.183
KSS49_7	shNf1	Rep1	Gapdh	Gapdh	17.406
KSS49_7	shNf1	Rep2	Gapdh	Gapdh	17.349
KSS49_7	shNf1	Rep3	Gapdh	Gapdh	17.425
KSS49_7	shNf1	Rep1	Gapdh	Fosl1	29.831
KSS49_7	shNf1	Rep2	Gapdh	Fosl1	29.786
KSS49_7	shNf1	Rep3	Gapdh	Fosl1	29.615
KSS49_7	shNf1	Rep1	Gapdh	Plau	30.386
KSS49_7	shNf1	Rep2	Gapdh	Plau	31.288
KSS49_7	shNf1	Rep3	Gapdh	Plau	30.805
KSS49_7	shNf1	Rep1	Gapdh	Plaur	29.879
KSS49_7	shNf1	Rep2	Gapdh	Plaur	29.758
KSS49_7	shNf1	Rep3	Gapdh	Plaur	30.108
KSS49_7	shNf1	Rep1	Gapdh	Timp1	26.151
KSS49_7	shNf1	Rep2	Gapdh	Timp1	26.15
KSS49_7	shNf1	Rep3	Gapdh	Timp1	26.124
KSS49_7	shNf1	Rep1	Gapdh	Cd44	23.183
KSS49_7	shNf1	Rep2	Gapdh	Cd44	23.102
KSS49_7	shNf1	Rep3	Gapdh	Cd44	23.233
KSS49_7	sgNf1	Rep1	Gapdh	Gapdh	17.509
KSS49_7	sgNf1	Rep2	Gapdh	Gapdh	17.328
KSS49_7	sgNf1	Rep3	Gapdh	Gapdh	17.307
KSS49_7	sgNf1	Rep1	Gapdh	Fosl1	29.536
KSS49_7	sgNf1	Rep2	Gapdh	Fosl1	29.594
KSS49_7	sgNf1	Rep3	Gapdh	Fosl1	29.63
KSS49_7	sgNf1	Rep1	Gapdh	Plau	30.169
KSS49_7	sgNf1	Rep2	Gapdh	Plau	30.223
KSS49_7	sgNf1	Rep3	Gapdh	Plau	29.615
KSS49_7	sgNf1	Rep1	Gapdh	Plaur	29.958
KSS49_7	sgNf1	Rep2	Gapdh	Plaur	30.005
KSS49_7	sgNf1	Rep3	Gapdh	Plaur	29.947
KSS49_7	sgNf1	Rep1	Gapdh	Timp1	26.068
KSS49_7	sgNf1	Rep2	Gapdh	Timp1	26.003
KSS49_7	sgNf1	Rep3	Gapdh	Timp1	25.968
KSS49_7	sgNf1	Rep1	Gapdh	Cd44	23.599
KSS49_7	sgNf1	Rep2	Gapdh	Cd44	23.421
KSS49_7	sgNf1	Rep3	Gapdh	Cd44	23.301
KSS49_7	KrasG12V	Rep1	Gapdh	Gapdh	16.84
KSS49_7	KrasG12V	Rep2	Gapdh	Gapdh	16.8
KSS49_7	KrasG12V	Rep3	Gapdh	Gapdh	16.908
KSS49_7	KrasG12V	Rep1	Gapdh	Fosl1	28.49
KSS49_7	KrasG12V	Rep2	Gapdh	Fosl1	28.753
KSS49_7	KrasG12V	Rep3	Gapdh	Fosl1	28.595
KSS49_7	KrasG12V	Rep1	Gapdh	Plau	28.455
KSS49_7	KrasG12V	Rep2	Gapdh	Plau	28.686
KSS49_7	KrasG12V	Rep3	Gapdh	Plau	28.248
KSS49_7	KrasG12V	Rep1	Gapdh	Plaur	28.585
KSS49_7	KrasG12V	Rep2	Gapdh	Plaur	28.493
KSS49_7	KrasG12V	Rep3	Gapdh	Plaur	28.476
KSS49_7	KrasG12V	Rep1	Gapdh	Timp1	25.251
KSS49_7	KrasG12V	Rep2	Gapdh	Timp1	25.165
KSS49_7	KrasG12V	Rep3	Gapdh	Timp1	25.066
KSS49_7	KrasG12V	Rep1	Gapdh	Cd44	22.809
KSS49_7	KrasG12V	Rep2	Gapdh	Cd44	22.901
KSS49_7	KrasG12V	Rep3	Gapdh	Cd44	22.811
KSS49_7_KrasG12V	sgCtrl	Rep1	Gapdh	Gapdh	19.093
KSS49_7_KrasG12V	sgCtrl	Rep2	Gapdh	Gapdh	18.898
KSS49_7_KrasG12V	sgCtrl	Rep3	Gapdh	Gapdh	18.926
KSS49_7_KrasG12V	sgCtrl	Rep1	Gapdh	Plau	28.457
KSS49_7_KrasG12V	sgCtrl	Rep2	Gapdh	Plau	28.971
KSS49_7_KrasG12V	sgCtrl	Rep3	Gapdh	Plau	28.577
KSS49_7_KrasG12V	sgCtrl	Rep1	Gapdh	Plaur	26.886
KSS49_7_KrasG12V	sgCtrl	Rep2	Gapdh	Plaur	26.835
KSS49_7_KrasG12V	sgCtrl	Rep3	Gapdh	Plaur	26.65
KSS49_7_KrasG12V	sgCtrl	Rep1	Gapdh	Itga7	26.774
KSS49_7_KrasG12V	sgCtrl	Rep2	Gapdh	Itga7	26.728
KSS49_7_KrasG12V	sgCtrl	Rep3	Gapdh	Itga7	26.932
KSS49_7_KrasG12V	sgCtrl	Rep1	Gapdh	Timp1	25.411
KSS49_7_KrasG12V	sgCtrl	Rep2	Gapdh	Timp1	25.331
KSS49_7_KrasG12V	sgCtrl	Rep3	Gapdh	Timp1	25.302
KSS49_7_KrasG12V	sgCtrl	Rep1	Gapdh	Fn1	23.107
KSS49_7_KrasG12V	sgCtrl	Rep2	Gapdh	Fn1	23.082
KSS49_7_KrasG12V	sgCtrl	Rep3	Gapdh	Fn1	22.918
KSS49_7_KrasG12V	sgCtrl	Rep1	Gapdh	Cyr61	23.493
KSS49_7_KrasG12V	sgCtrl	Rep2	Gapdh	Cyr61	23.546
KSS49_7_KrasG12V	sgCtrl	Rep3	Gapdh	Cyr61	23.501
KSS49_7_KrasG12V	sgCtrl	Rep1	Gapdh	Actn1	22.476
KSS49_7_KrasG12V	sgCtrl	Rep2	Gapdh	Actn1	22.833
KSS49_7_KrasG12V	sgCtrl	Rep3	Gapdh	Actn1	22.949
KSS49_7_KrasG12V	sgCtrl	Rep1	Gapdh	S100a4	27.093
KSS49_7_KrasG12V	sgCtrl	Rep2	Gapdh	S100a4	27.373
KSS49_7_KrasG12V	sgCtrl	Rep3	Gapdh	S100a4	27.064
KSS49_7_KrasG12V	sgCtrl	Rep1	Gapdh	Vim	20.453
KSS49_7_KrasG12V	sgCtrl	Rep2	Gapdh	Vim	20.411
KSS49_7_KrasG12V	sgCtrl	Rep3	Gapdh	Vim	20.581
KSS49_7_KrasG12V	sgCtrl	Rep1	Gapdh	Cd44	22.922
KSS49_7_KrasG12V	sgCtrl	Rep2	Gapdh	Cd44	22.67
KSS49_7_KrasG12V	sgCtrl	Rep3	Gapdh	Cd44	22.632
KSS49_7_KrasG12V	sgFosl1	Rep1	Gapdh	Gapdh	19.931
KSS49_7_KrasG12V	sgFosl1	Rep2	Gapdh	Gapdh	20.037
KSS49_7_KrasG12V	sgFosl1	Rep3	Gapdh	Gapdh	19.878
KSS49_7_KrasG12V	sgFosl1	Rep1	Gapdh	Itga7	29.89
KSS49_7_KrasG12V	sgFosl1	Rep2	Gapdh	Itga7	29.926
KSS49_7_KrasG12V	sgFosl1	Rep3	Gapdh	Itga7	29.74
KSS49_7_KrasG12V	sgFosl1	Rep1	Gapdh	Timp1	32.375
KSS49_7_KrasG12V	sgFosl1	Rep2	Gapdh	Timp1	32.311
KSS49_7_KrasG12V	sgFosl1	Rep3	Gapdh	Timp1	32.972
KSS49_7_KrasG12V	sgFosl1	Rep1	Gapdh	Plau	34.622
KSS49_7_KrasG12V	sgFosl1	Rep2	Gapdh	Plau	36.469
KSS49_7_KrasG12V	sgFosl1	Rep3	Gapdh	Plau	36.649
KSS49_7_KrasG12V	sgFosl1	Rep1	Gapdh	Plaur	31.06
KSS49_7_KrasG12V	sgFosl1	Rep2	Gapdh	Plaur	31.11
KSS49_7_KrasG12V	sgFosl1	Rep3	Gapdh	Plaur	30.989
KSS49_7_KrasG12V	sgFosl1	Rep1	Gapdh	Fn1	31.053
KSS49_7_KrasG12V	sgFosl1	Rep2	Gapdh	Fn1	31.109
KSS49_7_KrasG12V	sgFosl1	Rep3	Gapdh	Fn1	30.695
KSS49_7_KrasG12V	sgFosl1	Rep1	Gapdh	Cyr61	27.618
KSS49_7_KrasG12V	sgFosl1	Rep2	Gapdh	Cyr61	27.93
KSS49_7_KrasG12V	sgFosl1	Rep3	Gapdh	Cyr61	27.716
KSS49_7_KrasG12V	sgFosl1	Rep1	Gapdh	Actn1	27.597
KSS49_7_KrasG12V	sgFosl1	Rep2	Gapdh	Actn1	27.067
KSS49_7_KrasG12V	sgFosl1	Rep3	Gapdh	Actn1	27.384
KSS49_7_KrasG12V	sgFosl1	Rep1	Gapdh	S100a4	33.088
KSS49_7_KrasG12V	sgFosl1	Rep2	Gapdh	S100a4	32.606
KSS49_7_KrasG12V	sgFosl1	Rep3	Gapdh	S100a4	32.52
KSS49_7_KrasG12V	sgFosl1	Rep1	Gapdh	Vim	23.217
KSS49_7_KrasG12V	sgFosl1	Rep2	Gapdh	Vim	22.956
KSS49_7_KrasG12V	sgFosl1	Rep3	Gapdh	Vim	22.996
KSS49_7_KrasG12V	sgFosl1	Rep1	Gapdh	Cd44	26.674
KSS49_7_KrasG12V	sgFosl1	Rep2	Gapdh	Cd44	26.806
KSS49_7_KrasG12V	sgFosl1	Rep3	Gapdh	Cd44	27.329
KSS49_7_KrasG12V	sgCtrl	Rep1	Gapdh	Gapdh	19.093
KSS49_7_KrasG12V	sgCtrl	Rep2	Gapdh	Gapdh	18.898
KSS49_7_KrasG12V	sgCtrl	Rep3	Gapdh	Gapdh	18.926
KSS49_7_KrasG12V	sgCtrl	Rep1	Gapdh	Olig2	24.496
KSS49_7_KrasG12V	sgCtrl	Rep2	Gapdh	Olig2	24.353
KSS49_7_KrasG12V	sgCtrl	Rep3	Gapdh	Olig2	24.065
KSS49_7_KrasG12V	sgCtrl	Rep1	Gapdh	Ncam1	30.997
KSS49_7_KrasG12V	sgCtrl	Rep2	Gapdh	Ncam1	30.853
KSS49_7_KrasG12V	sgCtrl	Rep3	Gapdh	Ncam1	31.168
KSS49_7_KrasG12V	sgCtrl	Rep1	Gapdh	Dll3	39.328
KSS49_7_KrasG12V	sgCtrl	Rep2	Gapdh	Dll3	38.156
KSS49_7_KrasG12V	sgCtrl	Rep3	Gapdh	Dll3	37.599
KSS49_7_KrasG12V	sgCtrl	Rep1	Gapdh	Bcan	25.151
KSS49_7_KrasG12V	sgCtrl	Rep2	Gapdh	Bcan	25.196
KSS49_7_KrasG12V	sgCtrl	Rep3	Gapdh	Bcan	25.326
KSS49_7_KrasG12V	sgCtrl	Rep1	Gapdh	Lgr5	25.718
KSS49_7_KrasG12V	sgCtrl	Rep2	Gapdh	Lgr5	25.647
KSS49_7_KrasG12V	sgCtrl	Rep3	Gapdh	Lgr5	25.653
KSS49_7_KrasG12V	sgFosl1	Rep1	Gapdh	Gapdh	19.931
KSS49_7_KrasG12V	sgFosl1	Rep2	Gapdh	Gapdh	20.037
KSS49_7_KrasG12V	sgFosl1	Rep3	Gapdh	Gapdh	19.878
KSS49_7_KrasG12V	sgFosl1	Rep1	Gapdh	Olig2	23.521
KSS49_7_KrasG12V	sgFosl1	Rep2	Gapdh	Olig2	23.399
KSS49_7_KrasG12V	sgFosl1	Rep3	Gapdh	Olig2	23.358
KSS49_7_KrasG12V	sgFosl1	Rep1	Gapdh	Ncam1	29.252
KSS49_7_KrasG12V	sgFosl1	Rep2	Gapdh	Ncam1	29.608
KSS49_7_KrasG12V	sgFosl1	Rep3	Gapdh	Ncam1	29.659
KSS49_7_KrasG12V	sgFosl1	Rep1	Gapdh	Dll3	33.996
KSS49_7_KrasG12V	sgFosl1	Rep2	Gapdh	Dll3	32.028
KSS49_7_KrasG12V	sgFosl1	Rep3	Gapdh	Dll3	33.691
KSS49_7_KrasG12V	sgFosl1	Rep1	Gapdh	Bcan	23.306
KSS49_7_KrasG12V	sgFosl1	Rep2	Gapdh	Bcan	23.193
KSS49_7_KrasG12V	sgFosl1	Rep3	Gapdh	Bcan	23.126
KSS49_7_KrasG12V	sgFosl1	Rep1	Gapdh	Lgr5	25.558
KSS49_7_KrasG12V	sgFosl1	Rep2	Gapdh	Lgr5	25.25
KSS49_7_KrasG12V	sgFosl1	Rep3	Gapdh	Lgr5	25.206

## Sheet: Figure_3D
# Source Data Figure_3D
NAME	TYPE	SIZE	ES	NES	NOM p-val	FDR q-val	FWER p-val	RANK AT MAX	LEADING EDGE	Experiment
PHILLIPS_PN_2006	Non-MES	199	0.612356	2.10175	0	0	0	2350	tags=44%, list=11%, signal=49%	NSCs_Kras_sgFosl1
VERHAAK_PN_2010	Non-MES	138	0.592118	1.9345	0	0	0	2717	tags=48%, list=12%, signal=54%	NSCs_Kras_sgFosl1
RICHARDS_DEV_2021	Non-MES	2416	0.442012	1.80992	0	0.00058	0.003	3337	tags=28%, list=15%, signal=29%	NSCs_Kras_sgFosl1
WANG_PN_2017	Non-MES	38	0.53924	1.43646	0.0416667	0.0251151	0.234	1749	tags=39%, list=8%, signal=43%	NSCs_Kras_sgFosl1
WANG_CL_2017	Non-MES	46	0.485038	1.33381	0.0690423	0.0535667	0.468	2714	tags=26%, list=12%, signal=30%	NSCs_Kras_sgFosl1
VERHAAK_CL_2010	Non-MES	132	-0.263433	-0.821912	0.849829	0.847219	1	2637	tags=17%, list=12%, signal=19%	NSCs_Kras_sgFosl1
VERHAAK_NEU_2010	Non-MES	106	-0.288009	-0.873662	0.735593	0.792399	1	2331	tags=14%, list=11%, signal=16%	NSCs_Kras_sgFosl1
OLIG2_REGULON	Non-MES	138	-0.331288	-1.05234	0.342954	0.393263	1	1947	tags=15%, list=9%, signal=17%	NSCs_Kras_sgFosl1
SCHMITT_HMG_2020	MES	274	-0.39788	-1.35148	0.0108696	0.0551474	0.56	2372	tags=23%, list=11%, signal=26%	NSCs_Kras_sgFosl1
SCHMITT_TNF_2020	MES	288	-0.517243	-1.77261	0	8.5e-05	0.001	2596	tags=33%, list=12%, signal=37%	NSCs_Kras_sgFosl1
WANG_MES_2017	MES	46	-0.711341	-1.89123	0	0	0	2489	tags=50%, list=11%, signal=56%	NSCs_Kras_sgFosl1
PHILLIPS_MES_2006	MES	109	-0.626304	-1.91194	0	0	0	2270	tags=45%, list=10%, signal=50%	NSCs_Kras_sgFosl1
PHILLIPS_PROLIFERATIVE_2006	Non-MES	155	-0.645454	-2.06412	0	0	0	2322	tags=38%, list=10%, signal=42%	NSCs_Kras_sgFosl1
RICHARDS_INJ_2021	MES	3198	-0.528027	-2.06904	0	0	0	2859	tags=25%, list=13%, signal=25%	NSCs_Kras_sgFosl1
FOSL1_REGULON	MES	203	-0.658805	-2.18021	0	0	0	2640	tags=42%, list=12%, signal=47%	NSCs_Kras_sgFosl1
VERHAAK_MES_2010	MES	166	-0.687249	-2.2178	0	0	0	2632	tags=49%, list=12%, signal=55%	NSCs_Kras_sgFosl1

## Sheet: Figure_3E
# Source Data Figure_3E
Cells	Sample	Replicate	Normalizer	Gene	CT
KSS49_7_KrasG12V	sgCtrl	Rep1	Gapdh	Gapdh	19.093
KSS49_7_KrasG12V	sgCtrl	Rep2	Gapdh	Gapdh	18.898
KSS49_7_KrasG12V	sgCtrl	Rep3	Gapdh	Gapdh	18.926
KSS49_7_KrasG12V	sgCtrl	Rep1	Gapdh	Plau	28.457
KSS49_7_KrasG12V	sgCtrl	Rep2	Gapdh	Plau	28.971
KSS49_7_KrasG12V	sgCtrl	Rep3	Gapdh	Plau	28.577
KSS49_7_KrasG12V	sgCtrl	Rep1	Gapdh	Plaur	26.886
KSS49_7_KrasG12V	sgCtrl	Rep2	Gapdh	Plaur	26.835
KSS49_7_KrasG12V	sgCtrl	Rep3	Gapdh	Plaur	26.65
KSS49_7_KrasG12V	sgCtrl	Rep1	Gapdh	Itga7	26.774
KSS49_7_KrasG12V	sgCtrl	Rep2	Gapdh	Itga7	26.728
KSS49_7_KrasG12V	sgCtrl	Rep3	Gapdh	Itga7	26.932
KSS49_7_KrasG12V	sgCtrl	Rep1	Gapdh	Timp1	25.411
KSS49_7_KrasG12V	sgCtrl	Rep2	Gapdh	Timp1	25.331
KSS49_7_KrasG12V	sgCtrl	Rep3	Gapdh	Timp1	25.302
KSS49_7_KrasG12V	sgCtrl	Rep1	Gapdh	Fn1	23.107
KSS49_7_KrasG12V	sgCtrl	Rep2	Gapdh	Fn1	23.082
KSS49_7_KrasG12V	sgCtrl	Rep3	Gapdh	Fn1	22.918
KSS49_7_KrasG12V	sgCtrl	Rep1	Gapdh	Cyr61	23.493
KSS49_7_KrasG12V	sgCtrl	Rep2	Gapdh	Cyr61	23.546
KSS49_7_KrasG12V	sgCtrl	Rep3	Gapdh	Cyr61	23.501
KSS49_7_KrasG12V	sgCtrl	Rep1	Gapdh	Actn1	22.476
KSS49_7_KrasG12V	sgCtrl	Rep2	Gapdh	Actn1	22.833
KSS49_7_KrasG12V	sgCtrl	Rep3	Gapdh	Actn1	22.949
KSS49_7_KrasG12V	sgCtrl	Rep1	Gapdh	S100a4	27.093
KSS49_7_KrasG12V	sgCtrl	Rep2	Gapdh	S100a4	27.373
KSS49_7_KrasG12V	sgCtrl	Rep3	Gapdh	S100a4	27.064
KSS49_7_KrasG12V	sgCtrl	Rep1	Gapdh	Vim	20.453
KSS49_7_KrasG12V	sgCtrl	Rep2	Gapdh	Vim	20.411
KSS49_7_KrasG12V	sgCtrl	Rep3	Gapdh	Vim	20.581
KSS49_7_KrasG12V	sgCtrl	Rep1	Gapdh	Cd44	22.922
KSS49_7_KrasG12V	sgCtrl	Rep2	Gapdh	Cd44	22.67
KSS49_7_KrasG12V	sgCtrl	Rep3	Gapdh	Cd44	22.632
KSS49_7_KrasG12V	sgFosl1	Rep1	Gapdh	Gapdh	19.931
KSS49_7_KrasG12V	sgFosl1	Rep2	Gapdh	Gapdh	20.037
KSS49_7_KrasG12V	sgFosl1	Rep3	Gapdh	Gapdh	19.878
KSS49_7_KrasG12V	sgFosl1	Rep1	Gapdh	Itga7	29.89
KSS49_7_KrasG12V	sgFosl1	Rep2	Gapdh	Itga7	29.926
KSS49_7_KrasG12V	sgFosl1	Rep3	Gapdh	Itga7	29.74
KSS49_7_KrasG12V	sgFosl1	Rep1	Gapdh	Timp1	32.375
KSS49_7_KrasG12V	sgFosl1	Rep2	Gapdh	Timp1	32.311
KSS49_7_KrasG12V	sgFosl1	Rep3	Gapdh	Timp1	32.972
KSS49_7_KrasG12V	sgFosl1	Rep1	Gapdh	Plau	34.622
KSS49_7_KrasG12V	sgFosl1	Rep2	Gapdh	Plau	36.469
KSS49_7_KrasG12V	sgFosl1	Rep3	Gapdh	Plau	36.649
KSS49_7_KrasG12V	sgFosl1	Rep1	Gapdh	Plaur	31.06
KSS49_7_KrasG12V	sgFosl1	Rep2	Gapdh	Plaur	31.11
KSS49_7_KrasG12V	sgFosl1	Rep3	Gapdh	Plaur	30.989
KSS49_7_KrasG12V	sgFosl1	Rep1	Gapdh	Fn1	31.053
KSS49_7_KrasG12V	sgFosl1	Rep2	Gapdh	Fn1	31.109
KSS49_7_KrasG12V	sgFosl1	Rep3	Gapdh	Fn1	30.695
KSS49_7_KrasG12V	sgFosl1	Rep1	Gapdh	Cyr61	27.618
KSS49_7_KrasG12V	sgFosl1	Rep2	Gapdh	Cyr61	27.93
KSS49_7_KrasG12V	sgFosl1	Rep3	Gapdh	Cyr61	27.716
KSS49_7_KrasG12V	sgFosl1	Rep1	Gapdh	Actn1	27.597
KSS49_7_KrasG12V	sgFosl1	Rep2	Gapdh	Actn1	27.067
KSS49_7_KrasG12V	sgFosl1	Rep3	Gapdh	Actn1	27.384
KSS49_7_KrasG12V	sgFosl1	Rep1	Gapdh	S100a4	33.088
KSS49_7_KrasG12V	sgFosl1	Rep2	Gapdh	S100a4	32.606
KSS49_7_KrasG12V	sgFosl1	Rep3	Gapdh	S100a4	32.52
KSS49_7_KrasG12V	sgFosl1	Rep1	Gapdh	Vim	23.217
KSS49_7_KrasG12V	sgFosl1	Rep2	Gapdh	Vim	22.956
KSS49_7_KrasG12V	sgFosl1	Rep3	Gapdh	Vim	22.996
KSS49_7_KrasG12V	sgFosl1	Rep1	Gapdh	Cd44	26.674
KSS49_7_KrasG12V	sgFosl1	Rep2	Gapdh	Cd44	26.806
KSS49_7_KrasG12V	sgFosl1	Rep3	Gapdh	Cd44	27.329

## Sheet: Figure_3F
# Source Data Figure_3F
Cells	Sample	Replicate	Normalizer	Gene	CT
KSS49_7_KrasG12V	sgCtrl	Rep1	Gapdh	Gapdh	19.093
KSS49_7_KrasG12V	sgCtrl	Rep2	Gapdh	Gapdh	18.898
KSS49_7_KrasG12V	sgCtrl	Rep3	Gapdh	Gapdh	18.926
KSS49_7_KrasG12V	sgCtrl	Rep1	Gapdh	Olig2	24.496
KSS49_7_KrasG12V	sgCtrl	Rep2	Gapdh	Olig2	24.353
KSS49_7_KrasG12V	sgCtrl	Rep3	Gapdh	Olig2	24.065
KSS49_7_KrasG12V	sgCtrl	Rep1	Gapdh	Ncam1	30.997
KSS49_7_KrasG12V	sgCtrl	Rep2	Gapdh	Ncam1	30.853
KSS49_7_KrasG12V	sgCtrl	Rep3	Gapdh	Ncam1	31.168
KSS49_7_KrasG12V	sgCtrl	Rep1	Gapdh	Dll3	39.328
KSS49_7_KrasG12V	sgCtrl	Rep2	Gapdh	Dll3	38.156
KSS49_7_KrasG12V	sgCtrl	Rep3	Gapdh	Dll3	37.599
KSS49_7_KrasG12V	sgCtrl	Rep1	Gapdh	Bcan	25.151
KSS49_7_KrasG12V	sgCtrl	Rep2	Gapdh	Bcan	25.196
KSS49_7_KrasG12V	sgCtrl	Rep3	Gapdh	Bcan	25.326
KSS49_7_KrasG12V	sgCtrl	Rep1	Gapdh	Lgr5	25.718
KSS49_7_KrasG12V	sgCtrl	Rep2	Gapdh	Lgr5	25.647
KSS49_7_KrasG12V	sgCtrl	Rep3	Gapdh	Lgr5	25.653
KSS49_7_KrasG12V	sgFosl1	Rep1	Gapdh	Gapdh	19.931
KSS49_7_KrasG12V	sgFosl1	Rep2	Gapdh	Gapdh	20.037
KSS49_7_KrasG12V	sgFosl1	Rep3	Gapdh	Gapdh	19.878
KSS49_7_KrasG12V	sgFosl1	Rep1	Gapdh	Olig2	23.521
KSS49_7_KrasG12V	sgFosl1	Rep2	Gapdh	Olig2	23.399
KSS49_7_KrasG12V	sgFosl1	Rep3	Gapdh	Olig2	23.358
KSS49_7_KrasG12V	sgFosl1	Rep1	Gapdh	Ncam1	29.252
KSS49_7_KrasG12V	sgFosl1	Rep2	Gapdh	Ncam1	29.608
KSS49_7_KrasG12V	sgFosl1	Rep3	Gapdh	Ncam1	29.659
KSS49_7_KrasG12V	sgFosl1	Rep1	Gapdh	Dll3	33.996
KSS49_7_KrasG12V	sgFosl1	Rep2	Gapdh	Dll3	32.028
KSS49_7_KrasG12V	sgFosl1	Rep3	Gapdh	Dll3	33.691
KSS49_7_KrasG12V	sgFosl1	Rep1	Gapdh	Bcan	23.306
KSS49_7_KrasG12V	sgFosl1	Rep2	Gapdh	Bcan	23.193
KSS49_7_KrasG12V	sgFosl1	Rep3	Gapdh	Bcan	23.126
KSS49_7_KrasG12V	sgFosl1	Rep1	Gapdh	Lgr5	25.558
KSS49_7_KrasG12V	sgFosl1	Rep2	Gapdh	Lgr5	25.25
KSS49_7_KrasG12V	sgFosl1	Rep3	Gapdh	Lgr5	25.206
