# Supplementary material for: NF1 regulates mesenchymal glioblastoma plasticity and aggressiveness through the AP-1 transcription factor FOSL1
Source: eLife. 2021 Aug 17;10:e64846. doi: 10.7554/eLife.64846 (PMC8370767; doi:10.7554/eLife.64846)
Supplement: Figure 4—source data 1. [file elife-64846-fig4-data1.xlsx]

## Sheet: Figure_4A
Source Data Figure_4A
Sample	depth	gRNA	GG_YD7_1_S1.ddup.bam	GG_YD7_2_S2.ddup.bam	GG_YD7_3_S3.ddup.bam	GG_YD7_4_S4.ddup.bam	GG_YD7_5_S5.ddup.bam	GG_YD7_6_S6.ddup.bam	GG_YD7_7_S7.ddup.bam	GG_YD7_8_S8.ddup.bam	GG_YD7_9_S9.ddup.bam	GG_YD7_10_S10.ddup.bam	GG_YD7_11_S11.ddup.bam	GG_YD7_12_S12.ddup.bam
GG_YD7_1_S1.ddup.bam	44403811	sgCtrl	1	0.66823	-0.745353	-0.669063	-0.307969	-0.145066	0.356537	0.355687	-0.447928	-0.348723	-0.237638	-0.0694703
GG_YD7_2_S2.ddup.bam	34198456	sgCtrl	0.66823	1	-0.745531	-0.765121	-0.274438	0.0238598	0.290747	0.3658	-0.51796	-0.292212	-0.242735	-0.207907
GG_YD7_3_S3.ddup.bam	55907492	sgFosl1_1	-0.745353	-0.745531	1	0.709989	0.205083	-0.0989927	-0.515581	-0.487195	0.389757	0.237164	0.0809549	-0.0257577
GG_YD7_4_S4.ddup.bam	56176963	sgFosl1_1	-0.669063	-0.765121	0.709989	1	0.12963	-0.196474	-0.349777	-0.454116	0.396373	0.209414	0.0495163	-0.0783156
GG_YD7_5_S5.ddup.bam	22447151	sgFosl1_3	-0.307969	-0.274438	0.205083	0.12963	1	0.26243	-0.371461	-0.400655	-0.173454	-0.0471869	0.0899434	0.0780941
GG_YD7_6_S6.ddup.bam	28990195	sgFosl1_3	-0.145066	0.0238598	-0.0989927	-0.196474	0.26243	1	-0.26307	-0.191606	-0.133071	-0.11107	0.140453	0.0753127
GG_YD7_7_S7.ddup.bam	10984635	sgCtrl	0.356537	0.290747	-0.515581	-0.349777	-0.371461	-0.26307	1	0.477697	-0.167122	-0.149188	-0.174127	-0.0754895
GG_YD7_8_S8.ddup.bam	10318993	sgCtrl	0.355687	0.3658	-0.487195	-0.454116	-0.400655	-0.191606	0.477697	1	-0.202915	-0.11005	-0.146277	-0.0865808
GG_YD7_9_S9.ddup.bam	18954285	sgFosl1_1	-0.447928	-0.51796	0.389757	0.396373	-0.173454	-0.133071	-0.167122	-0.202915	1	0.152079	0.170047	0.120768
GG_YD7_10_S10.ddup.bam	16311697	sgFosl1_1	-0.348723	-0.292212	0.237164	0.209414	-0.0471869	-0.11107	-0.149188	-0.11005	0.152079	1	0.0888478	0.0588495
GG_YD7_11_S11.ddup.bam	7916089	sgFosl1_3	-0.237638	-0.242735	0.0809549	0.0495163	0.0899434	0.140453	-0.174127	-0.146277	0.170047	0.0888478	1	0.103203
GG_YD7_12_S12.ddup.bam	10294727	sgFosl1_3	-0.0694703	-0.207907	-0.0257577	-0.0783156	0.0780941	0.0753127	-0.0754895	-0.0865808	0.120768	0.0588495	0.103203	1

## Sheet: Figure_4C
Source Data Figure_4C
TFs	zmean_diff	p_value_adjusted
NFIL3	6.66609	0.00241498
FOXF2	4.73993	0.0803884
FOXD1	0.710233	0.532703
IRF2	-0.472055	0.808435
MZF1	-2.22091	0.0450565
MZF1(var.2)	18.4152	0.000927366
MAX::MYC	-0.509961	0.469073
PPARG	-0.643897	0.667231
Pax6	0.665748	0.757298
PBX1	-2.38006	0.0557732
RORA	-4.17049	0.0437651
RORA(var.2)	3.26233	0.0187468
RREB1	13.2043	0.0354051
RXRA::VDR	-2.99234	0.0554132
SOX9	3.01629	0.0357329
SPIB	-3.38855	0.314825
SRY	5.62694	0.0194051
TAL1::TCF3	0.106399	0.961763
REL	4.50631	0.0051819
RELA	2.14299	0.0425755
NR1H2::RXRA	-1.56925	0.494966
NFIC::TLX1	1.64802	0.327747
ZNF354C	0.433287	0.734888
CTCF	-0.893816	0.862532
EWSR1-FLI1	6.87065	0.027616
REST	-0.776595	0.77058
NFATC2	3.96723	0.104315
INSM1	0.548798	0.890394
HOXA5	6.03448	0.0141978
RARA::RXRA	-2.51735	0.0578152
NR4A2	-2.56493	0.0364898
PLAG1	1.66413	0.623073
ARNT::HIF1A	2.32612	0.310279
BATF::JUN	-6.93303	0.00178487
CDX2	-1.03146	0.320511
DUX4	0.285287	0.970985
E2F4	4.81595	0.063855
E2F6	3.32639	0.264336
FOS	-10.813	1.39695e-05
FOSL1	-10.4805	1.33241e-07
FOSL2	-11.6247	1.17124e-05
FOXH1	0.76908	0.736036
HNF4G	0.460249	0.858249
JUN	1.46386	0.690157
JUN(var.2)	-10.0637	0.00897239
JUNB	-10.1809	4.41014e-07
JUND	-10.2069	3.62414e-08
JUND(var.2)	2.20327	0.46897
MEF2C	1.86785	0.420879
MAF::NFE2	-3.94878	0.00818733
NFYB	0.750976	0.862532
NR2C2	7.85474	0.0288769
NRF1	15.4532	0.0171878
POU2F2	1.33852	0.411892
SMAD2::SMAD3::SMAD4	1.12366	0.667231
SP2	7.44168	0.338989
STAT1::STAT2	-4.79957	0.172608
TCF7L2	-0.223572	0.928384
ZBTB33	0.2377	0.862532
ZNF263	13.0502	0.0114652
CEBPA	-0.0757894	0.937102
ELK4	-1.0931	0.77058
ESR2	-1.33615	0.223295
FOXA1	0.283856	0.625444
IRF1	0.906552	0.985079
SP1	10.5356	0.154218
STAT1	-2.22629	0.0429707
STAT3	-3.29516	0.0799419
GATA1::TAL1	-1.35776	0.569377
USF1	5.74557	0.319771
YY1	11.4866	0.0554132
FOXP2	2.78359	0.17902
SREBF1	3.13193	0.0286095
SREBF2	0.776046	0.66726
THAP1	1.63985	0.329666
KLF5	4.7598	0.517039
DMRT3	-1.76995	0.0382829
EMX1	0.518425	0.973802
FOXG1	3.10626	0.0775815
LBX1	-3.44299	0.046438
NFATC3	0.771024	0.783878
POU6F1	0.43715	0.865652
SHOX	-4.00024	0.0292851
ALX3	0.579605	0.923885
BARHL2	-1.78237	0.183334
BHLHE41	9.28347	0.108368
CENPB	1.07931	0.517039
CREB3	-0.159618	0.967823
DBP	3.98981	0.0578152
EBF1	-0.0630364	0.797041
EHF	-3.88986	0.313221
ELF3	-0.881809	0.845029
ELF4	-1.87923	0.601438
ELF5	-1.33021	0.708498
EN1	-3.95833	0.00357156
EN2	0.367464	0.890394
ESX1	0.601117	0.928384
ETV6	-2.6493	0.542318
FLI1	-3.32723	0.440541
FOXI1	4.80977	0.0383991
FOXL1	5.22178	0.0114652
FOXO3	1.76841	0.369129
GCM1	0.0327436	0.728732
GRHL1	-2.82372	0.178994
GSC	1.26683	0.117873
HEY2	1.75631	0.320093
HINFP	-3.41681	0.183334
HLF	1.33382	0.440536
HNF1A	2.54993	0.0578152
HNF1B	-0.13273	0.961763
HOXA13	-0.162318	0.629046
HOXC11	-0.688974	0.60539
HSF1	-2.18211	0.320511
IRF8	-4.6486	0.182668
IRF9	-1.58816	0.454797
ISX	0.510188	0.928384
JDP2	-6.84502	0.00196058
JDP2(var.2)	4.41936	0.159124
KLF13	-0.768775	0.778251
LHX6	-0.737682	0.690157
MAFG	4.08963	0.0427051
MEF2B	-1.17163	0.509143
MEOX1	2.53183	0.230093
MIXL1	-1.02738	0.290503
MLX	6.72232	0.261731
MLXIPL	8.00238	0.264336
MSC	-0.266683	0.797041
MSX1	0.0954453	0.937102
MYF6	0.641831	0.616571
NEUROD2	1.61804	0.249605
NEUROG2	-0.140638	0.979391
NFIA	-1.70725	0.432924
NFIX	-1.02681	0.409019
NHLH1	-0.897024	0.845355
NKX2-3	-0.749646	0.429176
NKX2-8	-3.43234	0.0326621
NKX6-1	0.254816	0.928384
NKX6-2	1.30064	0.53521
OLIG2	0.705708	0.690157
ONECUT1	2.96922	0.310279
PAX4	0.126374	0.951051
PAX7	1.85849	0.355758
POU4F2	-0.641853	0.60539
RUNX3	-6.75957	0.0135513
SP4	7.5664	0.396221
SPDEF	-1.57308	0.440541
SPI1	-0.932154	0.783878
SPIC	-0.489414	0.928384
SRF	-1.52436	0.3362
T	1.46393	0.46897
TBX2	1.42201	0.414914
TBX20	1.56062	0.261731
TBX21	2.08987	0.409019
TEAD1	-2.86757	0.183334
TFAP4	-2.67653	0.0223327
TFCP2	-0.0878906	0.978049
TFEB	9.54271	0.175558
ZBTB7B	-0.183454	0.757298
ZBTB7C	-0.2172	0.775281
ZIC1	4.26244	0.187168
ZIC3	5.33407	0.0223327
ZBTB18	1.28211	0.217949
LBX2	1.7607	0.223295
LHX2	1.85002	0.47305
LHX9	1.74802	0.476344
LMX1A	0.610314	0.864579
LMX1B	0.370932	0.883541
MEOX2	-2.00414	0.125989
MNX1	2.63647	0.276891
MSX2	-3.8474	0.0223327
NKX3-2	-3.78314	0.0790014
NOTO	0.358421	0.965364
OTX1	-2.16523	0.447219
OTX2	0.33071	0.862532
PDX1	0.270179	0.797041
PHOX2A	1.59901	0.329607
PITX3	1.51854	0.369516
PROP1	3.6478	0.027129
PRRX1	-4.9654	0.00880365
RAX2	-3.73276	0.0284172
RAX	-0.26996	0.614222
RHOXF1	-1.42427	0.108162
UNCX	-4.05143	0.00897239
VAX1	-0.277914	0.881915
VAX2	-0.419804	0.825154
VENTX	0.182382	0.783878
VSX1	-1.25156	0.332211
VSX2	1.82359	0.495038
ESR1	-0.8889	0.347152
ESRRB	-0.225964	0.825154
NR2F1	-0.326382	0.748756
NR3C1	1.33685	0.87655
NR3C2	-0.168848	0.69353
RARA	3.41636	0.0723884
RARA(var.2)	-1.09047	0.517039
BCL6B	-0.00793376	0.948813
EGR2	4.0835	0.250965
EGR3	5.62388	0.372775
EGR4	6.16682	0.263646
GLI2	-3.67489	0.00947427
GLIS1	4.88851	0.00797628
GLIS2	4.12811	0.0383991
GLIS3	4.44014	0.0324749
HIC2	2.61513	0.0622897
KLF14	4.94825	0.562024
KLF16	6.88363	0.440541
SCRT1	-2.46268	0.0901414
SCRT2	-1.01869	0.45368
SNAI2	-0.463016	0.969232
SP3	7.28106	0.454797
SP8	5.66372	0.601156
YY2	8.22977	0.078284
ZBED1	-2.70317	0.269753
ZIC4	5.49612	0.0432445
ZNF143	2.09658	0.0364898
ZNF410	1.76197	0.213362
ZNF740	9.16696	0.0613849
CUX1	3.26762	0.146538
CUX2	1.00107	0.440541
ONECUT2	4.26664	0.0338926
ONECUT3	2.55328	0.197372
E2F3	4.48454	0.223295
E2F7	3.68915	0.0799419
ELF1	-1.68954	0.623073
ELK3	-4.79523	0.185029
ERF	-3.17917	0.399339
ERG	-2.898	0.496793
ETS1	-3.24745	0.42172
ETV1	-3.8756	0.396651
ETV2	-2.05084	0.649541
ETV3	-4.08615	0.389542
ETV4	-3.11698	0.362071
ETV5	-2.28412	0.499454
FEV	-3.65098	0.429607
GATA5	2.50541	0.0141978
GCM2	2.6462	0.128588
LEF1	5.84675	0.0578651
HSF2	-2.07138	0.4812
HSF4	-0.932547	0.867697
IRF7	0.764498	0.728732
MEF2A	0.389714	0.985079
MEF2D	0.330145	0.937102
MEIS1	3.72569	0.162835
MEIS2	0.470247	0.879791
MEIS3	0.470247	0.879791
MYBL1	0.285647	0.83492
MYBL2	0.591905	0.69353
NFKB1	3.7602	0.169696
NFKB2	5.5672	0.0539989
PAX1	0.876795	0.612235
PAX3	-1.64051	0.278374
PAX9	1.04309	0.736036
PKNOX1	4.49377	0.0223327
PKNOX2	4.35124	0.0496473
POU1F1	0.930476	0.38763
POU2F1	1.84346	0.159124
POU3F1	1.58848	0.0969543
POU3F2	3.05311	0.0335409
POU3F3	2.55176	0.00797628
POU3F4	1.72551	0.0411484
POU4F1	-1.05461	0.476344
POU4F3	0.592223	0.740665
POU5F1B	0.735382	0.223295
POU6F2	-1.58248	0.471872
PROX1	0.464463	0.708498
RFX2	1.34828	0.369516
SMAD3	-3.66308	0.0639678
TGIF1	3.01673	0.103955
TGIF2	4.8387	0.00472916
RFX3	0.105483	0.963151
RFX4	-0.511977	0.69353
RFX5	1.82465	0.190868
RUNX2	-6.17459	0.0113569
EOMES	2.17623	0.429176
MGA	2.51901	0.0482575
TBR1	2.03407	0.317615
TBX15	0.674436	0.614222
TBX19	1.23158	0.372775
TBX1	1.41425	0.152928
TBX4	1.41425	0.152928
TBX5	-0.0263754	0.858249
TEAD3	-1.4419	0.199474
TEAD4	-3.07165	0.0427051
TFAP2A(var.2)	3.21303	0.11499
TFAP2A	-0.0958997	0.937102
TFAP2B	-1.25515	0.351541
TFAP2B(var.2)	-1.45367	0.60539
TFAP2B(var.3)	0.162279	0.937102
TFAP2C	0.624057	0.928384
TFAP2C(var.2)	0.875476	0.797041
TFAP2C(var.3)	-1.44816	0.198833
BHLHE40	6.62392	0.220133
BHLHE23	0.875986	0.542318
BHLHE22	-0.309737	0.929089
CLOCK	3.96462	0.0578152
FIGLA	1.60283	0.278374
HES5	-0.224743	0.862532
HES7	0.953668	0.764618
HEY1	2.76933	0.154218
ID4	1.54373	0.329607
MAX	3.00828	0.215897
MNT	3.47739	0.0463481
OLIG1	-0.547294	0.562024
OLIG3	-0.0297534	0.963151
SREBF2(var.2)	7.83318	0.128588
TCF3	2.52779	0.154218
TCF4	1.54325	0.270396
ATF4	-0.19534	0.797041
ATF7	8.34424	0.0467369
BATF3	4.14432	0.223828
CEBPB	-0.3139	0.890394
CEBPD	-2.71211	0.0237266
CEBPE	1.2733	0.299719
CEBPG	0.969955	0.329666
CREB3L1	-3.33785	0.078284
NFE2	-7.55684	0.000927366
NRL	-6.61355	0.000927366
TEF	5.85362	0.000617119
XBP1	-4.2173	0.0427654
FOXB1	3.39525	0.0051819
FOXC1	3.48344	0.0322842
FOXC2	2.07135	0.223295
FOXD2	2.72472	0.185418
FOXO4	4.3147	0.0450565
FOXO6	5.22178	0.0114652
FOXP3	1.47726	0.316282
RXRB	2.54694	0.264336
RXRG	2.49884	0.249605
TP63	0.234565	0.970985
TP53	2.47304	0.183334
TP73	0.675142	0.637885
GMEB2	1.57791	0.447219
MTF1	-7.0782	0.0114652
E2F1	1.04588	0.542318
E2F2	5.33198	0.00241498
E2F8	5.63613	0.00544583
SOX21	-2.52823	0.0314594
SOX4	1.41389	0.19424
SOX8	-0.678127	0.69353
TFEC	8.41847	0.180276
TFAP2A(var.3)	-1.80998	0.190779
ELK1	-4.81338	0.267635
HOXD12	-0.235854	0.690157
BARX1	0.713792	0.400442
BSX	-0.348334	0.401126
CDX1	1.7414	0.432924
DLX6	0.0414188	0.948813
DUXA	-2.22275	0.227207
EMX2	2.74322	0.240142
EVX1	-0.966584	0.372775
EVX2	2.21606	0.0377583
GBX1	1.06742	0.568477
GBX2	-0.18315	0.649541
GSC2	1.96461	0.116709
GSX1	0.763667	0.649541
GSX2	-1.55271	0.429176
HESX1	0.159569	0.928384
HMBOX1	-2.8406	0.252228
HOXA10	2.28033	0.329666
HOXA2	0.443752	0.6846
HOXB13	-1.60515	0.248667
HOXB2	-0.425335	0.625452
HOXB3	-1.26135	0.517039
HOXC10	0.685927	0.937102
HOXC12	0.394163	0.937102
HOXC13	-4.45787	0.0383991
HOXD11	-2.48548	0.125316
HOXD13	-2.81419	0.301901
ISL2	-2.30903	0.244157
ASCL1	-1.90993	0.372775
BACH2	-6.13472	0.0088378
CREB1	3.99575	0.332211
CTCFL	0.413376	0.961763
FOXK1	-0.539102	0.400442
FOXK2	4.69025	0.0361258
FOXP1	0.890972	0.536496
GATA2	1.31887	0.332211
GATA6	3.05734	0.0500835
GRHL2	-0.999772	0.757298
HIF1A	1.65954	0.222198
KLF4	-1.74118	0.146538
KLF9	0.313961	0.93598
MAFF	-1.89779	0.0237266
MAFK	-0.258012	0.979391
MITF	7.85284	0.277284
MXI1	3.72184	0.13855
MYC	3.46904	0.163522
MYB	-0.0930919	0.910629
MYCN	3.00942	0.00244449
NEUROD1	-1.58766	0.075459
NFIC	-1.95473	0.11871
NFYA	-0.800069	0.654333
NR1H4	0.229126	0.886552
NR2F2	-0.140808	0.93598
NR4A1	-0.293708	0.937102
PAX5	0.186332	0.928384
PBX2	-1.96317	0.0775815
PBX3	-0.565186	0.690157
POU5F1	-0.203777	0.66726
PRDM1	-2.39387	0.0637114
RBPJ	-1.16531	0.57246
RELB	-0.862969	0.578512
SIX1	-0.857698	0.469073
SIX2	-3.3569	0.034541
SOX10	3.81993	0.0383991
SOX13	4.40551	0.0476719
TEAD2	-1.27644	0.440541
TFDP1	1.16946	0.862532
TWIST1	-0.922271	0.424939
USF2	6.98256	0.267635
ZBTB7A	-1.88504	0.440541
ZEB1	-1.60278	0.517039
ZNF24	6.17923	0.00980969
ZNF384	8.7324	0.00498831
ZNF282	0.449662	0.961763
ZSCAN4	4.64582	0.0653906
GATA3	1.38478	0.0973427
FOS::JUN	-6.48771	0.0237266
FOS::JUN(var.2)	5.05886	0.0620753
FOSB::JUN	6.94948	0.0578651
FOSL1::JUN	-7.50537	0.0118726
FOSL1::JUN(var.2)	5.39285	0.122563
FOSL2::JUN	-7.16797	0.0051819
FOSL2::JUN(var.2)	6.20531	0.078284
JUN::JUNB	-3.1905	0.128302
JUN::JUNB(var.2)	5.1544	0.103955
FOS::JUNB	-8.79811	0.0114652
FOSB::JUNB	-6.63068	0.000118551
FOSB::JUNB(var.2)	6.66382	0.0223327
FOSL1::JUNB	-8.90276	0.0114652
FOSL2::JUNB	-7.79039	0.00429762
FOSL2::JUNB(var.2)	7.64169	0.0314594
JUNB(var.2)	5.77246	0.0429707
FOS::JUND	-8.42892	0.00357156
FOSL1::JUND	-5.78016	0.0124058
FOSL1::JUND(var.2)	7.68235	0.099261
FOSL2::JUND	-7.24354	0.000927366
FOSL2::JUND(var.2)	6.81064	0.0309847
NR1A4::RXRA	-2.84362	0.0318278
NR4A2::RXRA	-2.44104	0.0318278
PPARA::RXRA	5.35768	0.0270461
RARA::RXRG	2.11668	0.526742
RORB	0.148112	0.925314
RORC	2.2811	0.272645
SOX15	7.34727	0.0175468
TFE3	8.18243	0.299911
VDR	-1.27632	0.154218
EGR1	5.39452	0.400334
IRF3	-2.03025	0.320093
IRF4	-4.16052	0.175558
IRF5	-1.00928	0.739267
TCF7L1	1.1169	0.440541

## Sheet: Figure_4D
Source Data Figure_4D
ID	Description	GeneRatio	BgRatio	pvalue	p.adjust	qvalue	geneID	Count
GO:0045165	cell fate commitment	32/169	251/18862	8.29831e-28	2.12437e-24	1.45002e-24	PRRX1/IRF4/GLI2/FEV/LBX1/SIX2/STAT3/PRDM1/ISL2/ETV2/ASCL1/BARHL2/DMRT3/KLF4/NEUROD1/POU6F2/SPDEF/GSX2/TEAD3/RBPJ/POU4F1/SIX1/SOX8/PPARG/OLIG1/HES5/TCF7L2/POU5F1/HOXA13/NR2F2/OLIG3/TBX5	32
GO:0007389	pattern specification process	33/169	426/18862	1.12859e-21	1.4446e-18	9.86035e-19	HOXC13/UNCX/EN1/NKX3-2/GLI2/SMAD3/LBX1/SIX2/HOXD13/HOXD11/PBX1/OTX1/MEOX2/PBX2/ASCL1/DMRT3/NEUROD1/GSX2/SRF/HOXB3/RBPJ/CDX2/SIX1/PBX3/RFX4/HOXB2/VAX2/RAX/HOXD12/HES5/GBX2/NR2F2/TBX5	33
GO:0048568	embryonic organ development	32/169	412/18862	4.6157e-21	3.93873e-18	2.68845e-18	JUNB/PRRX1/EN1/NKX3-2/GLI2/SMAD3/LBX1/SIX2/TEAD4/TEAD1/PBX1/OTX1/PBX2/NEUROD1/SRF/TEAD3/TEAD2/HOXB3/RBPJ/CDX2/GRHL2/TWIST1/SIX1/PBX3/HOXB2/VAX2/CEBPB/ATF4/GBX2/NR2F2/TFAP2A/CEBPA	32
GO:0003002	regionalization	27/169	326/18862	1.42114e-18	9.09528e-16	6.20813e-16	HOXC13/EN1/GLI2/SMAD3/SIX2/HOXD13/HOXD11/PBX1/OTX1/MEOX2/PBX2/ASCL1/DMRT3/NEUROD1/GSX2/SRF/HOXB3/RBPJ/CDX2/SIX1/PBX3/RFX4/HOXB2/VAX2/HES5/GBX2/NR2F2	27
GO:0001708	cell fate specification	15/169	88/18862	1.84727e-15	9.45804e-13	6.45574e-13	GLI2/FEV/SIX2/ISL2/ETV2/ASCL1/DMRT3/GSX2/RBPJ/POU4F1/SIX1/POU5F1/HOXA13/OLIG3/TBX5	15
GO:0048663	neuron fate commitment	13/169	59/18862	4.25721e-15	1.81641e-12	1.23982e-12	PRRX1/GLI2/FEV/LBX1/ISL2/ASCL1/DMRT3/GSX2/RBPJ/POU4F1/SIX1/OLIG1/OLIG3	13
GO:0006367	transcription initiation from RNA polymerase II promoter	19/169	187/18862	5.68716e-15	2.07988e-12	1.41965e-12	RUNX2/RORA/TEAD4/TEAD1/NR4A2/SRF/TEAD3/ESR2/TEAD2/VDR/RBPJ/ESR1/PPARG/NR2F1/NR4A1/ESRRB/NR3C2/HNF1B/TBX5	19
GO:0006352	DNA-templated transcription, initiation	21/169	249/18862	8.45506e-15	2.70562e-12	1.84676e-12	FOSL1/RUNX2/RORA/TEAD4/TEAD1/NR4A2/SRF/TEAD3/ESR2/TEAD2/VDR/RBPJ/TWIST1/ESR1/PPARG/NR2F1/NR4A1/ESRRB/NR3C2/HNF1B/TBX5	21
GO:0009952	anterior/posterior pattern specification	19/169	203/18862	2.58665e-14	7.35758e-12	5.02203e-12	HOXC13/EN1/GLI2/SMAD3/SIX2/HOXD13/PBX1/OTX1/MEOX2/NEUROD1/SRF/HOXB3/RBPJ/CDX2/PBX3/HOXB2/HES5/GBX2/NR2F2	19
GO:0048736	appendage development	17/169	167/18862	1.58795e-13	3.69559e-11	2.52248e-11	PRRX1/HOXC13/EN1/GLI2/HOXD13/PBX1/MEOX2/PBX2/TFAP2B/GRHL2/TWIST1/RAX/HOXD12/HOXA13/NR2F2/TFAP2A/TBX5	17
GO:0060173	limb development	17/169	167/18862	1.58795e-13	3.69559e-11	2.52248e-11	PRRX1/HOXC13/EN1/GLI2/HOXD13/PBX1/MEOX2/PBX2/TFAP2B/GRHL2/TWIST1/RAX/HOXD12/HOXA13/NR2F2/TFAP2A/TBX5	17
GO:0001501	skeletal system development	26/169	486/18862	2.28206e-13	4.86839e-11	3.323e-11	RUNX3/RUNX2/PRRX1/UNCX/SHOX/EN1/MSX2/NKX3-2/GLI2/SMAD3/SIX2/FLI1/TEAD4/HOXD13/PBX1/SRF/HOXB3/GRHL2/TWIST1/SIX1/SNAI2/HOXB2/HOXD12/HES5/HOXA13/TFAP2A	26
GO:0048880	sensory system development	23/169	369/18862	2.66265e-13	5.24336e-11	3.57894e-11	NRL/SMAD3/STAT3/PBX1/PBX2/KLF4/NEUROD1/SRF/TFAP2B/VSX1/POU4F1/GRHL2/HSF4/TWIST1/SOX8/POU4F2/PBX3/VAX2/VAX1/RAX/HES5/ATF4/TFAP2A	23
GO:1902893	regulation of pri-miRNA transcription by RNA polymerase II	11/169	51/18862	7.51747e-13	1.37462e-10	9.38271e-11	FOS/FOSL1/SMAD3/STAT3/ETS1/TEAD1/KLF4/SRF/SPI1/PPARG/POU5F1	11
GO:0061614	pri-miRNA transcription by RNA polymerase II	11/169	52/18862	9.46112e-13	1.6147e-10	1.10214e-10	FOS/FOSL1/SMAD3/STAT3/ETS1/TEAD1/KLF4/SRF/SPI1/PPARG/POU5F1	11
GO:0048665	neuron fate specification	9/169	27/18862	1.22567e-12	1.93316e-10	1.31951e-10	GLI2/FEV/ISL2/ASCL1/DMRT3/GSX2/POU4F1/SIX1/OLIG3	9
GO:0001654	eye development	22/169	359/18862	1.28374e-12	1.93316e-10	1.31951e-10	NRL/SMAD3/STAT3/PBX1/PBX2/KLF4/NEUROD1/SRF/TFAP2B/VSX1/GRHL2/HSF4/TWIST1/SOX8/POU4F2/PBX3/VAX2/VAX1/RAX/HES5/ATF4/TFAP2A	22
GO:0150063	visual system development	22/169	363/18862	1.60096e-12	2.27693e-10	1.55415e-10	NRL/SMAD3/STAT3/PBX1/PBX2/KLF4/NEUROD1/SRF/TFAP2B/VSX1/GRHL2/HSF4/TWIST1/SOX8/POU4F2/PBX3/VAX2/VAX1/RAX/HES5/ATF4/TFAP2A	22
GO:1902895	positive regulation of pri-miRNA transcription by RNA polymerase II	10/169	40/18862	1.71443e-12	2.30997e-10	1.57671e-10	FOS/FOSL1/SMAD3/STAT3/ETS1/TEAD1/KLF4/SRF/SPI1/PPARG	10
GO:0045444	fat cell differentiation	17/169	221/18862	1.51696e-11	1.94171e-09	1.32535e-09	JDP2/XBP1/RORA/SMAD3/NR4A2/ZBTB7A/KLF4/TFAP2B/SIX1/SOX8/PPARG/CEBPB/NR4A1/TCF7L2/ZBTB7C/ZBTB7B/CEBPA	17
GO:0048732	gland development	22/169	413/18862	2.02923e-11	2.47372e-09	1.68848e-09	XBP1/GLI2/SMAD3/NKX2-8/ETS1/HOXD13/PBX1/ASCL1/HOXB13/SRF/HOXB3/RBPJ/ESR1/ELF3/SIX1/NKX2-3/BSX/CEBPB/ZBTB7B/HOXA13/HNF1B/CEBPA	22
GO:0001701	in utero embryonic development	20/169	335/18862	2.32404e-11	2.70434e-09	1.84589e-09	FOSL1/JUNB/GLI2/SMAD3/HINFP/ETV2/MAFF/KLF4/SRF/RBPJ/CDX2/GRHL2/TWIST1/ELF3/SOX8/SPIC/CEBPB/POU5F1/NR2F2/CEBPA	20
GO:0030099	myeloid cell differentiation	22/169	419/18862	2.68504e-11	2.98857e-09	2.0399e-09	FOS/JUNB/NFE2/IRF8/IRF4/FLI1/STAT3/ETS1/STAT1/ETV2/ZBTB7A/SRF/RBPJ/POU4F1/SPI1/RELB/KLF13/NKX2-3/PPARG/POU4F2/CEBPB/CEBPA	22
GO:0030522	intracellular receptor signaling pathway	18/169	274/18862	5.15826e-11	5.50214e-09	3.75558e-09	RORA/STAT3/NR4A2/IRF3/ZBTB7A/RHOXF1/ESR2/VDR/TWIST1/ESR1/PPARG/POU4F2/SNAI2/NR2F1/NR4A1/ESRRB/NR3C2/NR2F2	18
GO:0048562	embryonic organ morphogenesis	18/169	277/18862	6.17127e-11	6.31939e-09	4.3134e-09	PRRX1/NKX3-2/GLI2/SMAD3/LBX1/SIX2/OTX1/NEUROD1/SRF/TEAD2/HOXB3/GRHL2/TWIST1/SIX1/HOXB2/VAX2/GBX2/TFAP2A	18
GO:0090596	sensory organ morphogenesis	17/169	244/18862	7.2712e-11	7.15934e-09	4.88672e-09	NRL/PRRX1/HOXC13/NKX3-2/GLI2/SIX2/STAT3/OTX1/TFAP2B/VSX1/TWIST1/SIX1/SOX8/VAX2/ATF4/GBX2/TFAP2A	17
GO:0035107	appendage morphogenesis	13/169	134/18862	2.33096e-10	2.13116e-08	1.45466e-08	PRRX1/EN1/GLI2/HOXD13/PBX1/PBX2/TFAP2B/GRHL2/TWIST1/HOXD12/HOXA13/TFAP2A/TBX5	13
GO:0035108	limb morphogenesis	13/169	134/18862	2.33096e-10	2.13116e-08	1.45466e-08	PRRX1/EN1/GLI2/HOXD13/PBX1/PBX2/TFAP2B/GRHL2/TWIST1/HOXD12/HOXA13/TFAP2A/TBX5	13
GO:0030326	embryonic limb morphogenesis	12/169	112/18862	3.67644e-10	3.13723e-08	2.14137e-08	PRRX1/EN1/GLI2/HOXD13/PBX1/PBX2/GRHL2/TWIST1/HOXD12/HOXA13/TFAP2A/TBX5	12
GO:0035113	embryonic appendage morphogenesis	12/169	112/18862	3.67644e-10	3.13723e-08	2.14137e-08	PRRX1/EN1/GLI2/HOXD13/PBX1/PBX2/GRHL2/TWIST1/HOXD12/HOXA13/TFAP2A/TBX5	12
GO:0043010	camera-type eye development	18/169	310/18862	3.86219e-10	3.18942e-08	2.17699e-08	NRL/SMAD3/KLF4/NEUROD1/SRF/TFAP2B/VSX1/GRHL2/HSF4/TWIST1/SOX8/POU4F2/VAX2/VAX1/RAX/HES5/ATF4/TFAP2A	18
GO:0043583	ear development	15/169	202/18862	4.12927e-10	3.30342e-08	2.2548e-08	PRRX1/NKX3-2/GLI2/SIX2/OTX1/NEUROD1/RBPJ/TWIST1/SIX1/ESRRB/HES5/GBX2/HOXA13/TFAP2A/CEBPA	15
GO:0007517	muscle organ development	18/169	317/18862	5.53298e-10	4.24614e-08	2.89827e-08	FOS/XBP1/SMAD3/LBX1/TEAD4/MEOX2/MAFF/PAX3/MEF2B/RBPJ/POU4F1/TWIST1/SIX1/SOX8/FOXK1/VAX1/MSC/NR2F2	18
GO:0001503	ossification	20/169	401/18862	5.63941e-10	4.24614e-08	2.89827e-08	JUND/JUNB/RUNX3/RUNX2/MSX2/GLI2/SMAD3/SIX2/CREB3L1/PBX1/RBPJ/TWIST1/REST/SOX8/PPARG/SNAI2/CEBPB/ATF4/TFAP2A/CEBPA	20
GO:0021953	central nervous system neuron differentiation	14/169	178/18862	7.62379e-10	5.57625e-08	3.80616e-08	RORA/UNCX/GLI2/LBX1/NR4A2/ISL2/ASCL1/DMRT3/GSX2/POU4F1/LHX6/HES5/GBX2/OLIG3	14
GO:0001649	osteoblast differentiation	15/169	223/18862	1.62964e-09	1.15886e-07	7.90997e-08	JUND/JUNB/RUNX2/MSX2/GLI2/SMAD3/CREB3L1/TWIST1/REST/SOX8/PPARG/SNAI2/CEBPB/ATF4/CEBPA	15
GO:0030900	forebrain development	18/169	357/18862	3.65398e-09	2.52816e-07	1.72563e-07	UNCX/GLI2/ETS1/NR4A2/OTX1/ASCL1/NEUROD1/GSX2/SRF/RBPJ/POU4F1/LHX6/RFX4/VAX2/RAX/HES5/GBX2/NR2F2	18
GO:0001655	urogenital system development	17/169	320/18862	4.67125e-09	3.14694e-07	2.148e-07	GLI2/SMAD3/SIX2/HOXD13/HOXD11/PBX1/STAT1/NFIA/HOXB13/TFAP2B/ESR1/SIX1/SOX8/HES5/HOXA13/HNF1B/TFAP2A	17
GO:0061448	connective tissue development	15/169	243/18862	5.27409e-09	3.46197e-07	2.36302e-07	RUNX3/RUNX2/PRRX1/XBP1/UNCX/NKX3-2/GLI2/SMAD3/SIX2/SRF/HOXB3/SOX8/POU4F2/SNAI2/HES5	15
GO:0061138	morphogenesis of a branching epithelium	13/169	173/18862	5.48685e-09	3.51159e-07	2.39689e-07	GLI2/SIX2/HOXD13/HOXD11/PBX1/HOXB13/SRF/GRHL2/ESR1/SIX1/SOX8/GBX2/HOXA13	13
GO:0048483	autonomic nervous system development	8/169	46/18862	6.86899e-09	4.28893e-07	2.92748e-07	ASCL1/RHOXF1/TFAP2B/SIX1/SOX8/HOXB2/GBX2/TFAP2A	8
GO:0001764	neuron migration	12/169	145/18862	7.2888e-09	4.4427e-07	3.03243e-07	NR4A2/SCRT1/ASCL1/BARHL2/SRF/SCRT2/EVX1/TWIST1/LHX6/VAX1/NR2F2/OLIG3	12
GO:0019827	stem cell population maintenance	12/169	146/18862	7.88048e-09	4.69163e-07	3.20235e-07	PRRX1/SIX2/STAT3/PBX1/KLF4/RBPJ/CDX2/SPI1/REST/ESRRB/HES5/POU5F1	12
GO:0048706	embryonic skeletal system development	11/169	117/18862	8.2341e-09	4.79075e-07	3.27e-07	PRRX1/NKX3-2/SMAD3/SIX2/PBX1/HOXB3/GRHL2/TWIST1/SIX1/HOXB2/TFAP2A	11
GO:0051101	regulation of DNA binding	11/169	118/18862	9.0109e-09	5.11726e-07	3.49287e-07	IRF4/MSX2/TFAP4/ZBTB7A/KLF4/NEUROD1/POU4F1/TWIST1/PPARG/POU4F2/ZBTB7C	11
GO:0098727	maintenance of cell number	12/169	148/18862	9.19508e-09	5.11726e-07	3.49287e-07	PRRX1/SIX2/STAT3/PBX1/KLF4/RBPJ/CDX2/SPI1/REST/ESRRB/HES5/POU5F1	12
GO:0001763	morphogenesis of a branching structure	13/169	186/18862	1.31568e-08	7.16623e-07	4.89143e-07	GLI2/SIX2/HOXD13/HOXD11/PBX1/HOXB13/SRF/GRHL2/ESR1/SIX1/SOX8/GBX2/HOXA13	13
GO:0035019	somatic stem cell population maintenance	9/169	71/18862	1.39049e-08	7.41594e-07	5.06186e-07	SIX2/STAT3/PBX1/KLF4/RBPJ/CDX2/SPI1/REST/POU5F1	9
GO:2000677	regulation of transcription regulatory region DNA binding	8/169	51/18862	1.61373e-08	8.43091e-07	5.75465e-07	MSX2/ZBTB7A/KLF4/NEUROD1/POU4F1/TWIST1/POU4F2/ZBTB7C	8
GO:0045664	regulation of neuron differentiation	13/169	190/18862	1.69775e-08	8.6925e-07	5.9332e-07	GLI2/LBX1/PBX1/ISL2/ETV5/ASCL1/ZEB1/NEUROD1/SIX1/REST/SOX8/POU4F2/HES5	13
GO:0060562	epithelial tube morphogenesis	16/169	309/18862	1.94735e-08	9.77491e-07	6.67202e-07	GLI2/SMAD3/LBX1/SIX2/HOXD11/PBX1/SRF/TEAD2/RBPJ/GRHL2/TWIST1/ESR1/SIX1/SOX8/HES5/GBX2	16
GO:0009953	dorsal/ventral pattern formation	9/169	77/18862	2.87688e-08	1.41631e-06	9.66725e-07	EN1/GLI2/HOXD11/ASCL1/DMRT3/GSX2/RFX4/HOXB2/VAX2	9
GO:1903131	mononuclear cell differentiation	18/169	411/18862	3.22641e-08	1.55842e-06	1.06372e-06	RUNX3/IRF8/XBP1/RORA/IRF4/GLI2/STAT3/PRDM1/ZBTB7A/SRF/RBPJ/SPI1/RELB/NKX2-3/PPARG/CEBPB/ZBTB7B/MYB	18
GO:0001890	placenta development	11/169	135/18862	3.69706e-08	1.75268e-06	1.19632e-06	FOSL1/JUNB/ETV2/VDR/RBPJ/CDX2/GRHL2/PPARG/CEBPB/NR2F2/CEBPA	11
GO:0030902	hindbrain development	11/169	139/18862	5.00419e-08	2.32922e-06	1.58985e-06	RORA/EN1/GLI2/OTX1/ASCL1/NEUROD1/GSX2/HOXB3/POU4F1/HOXB2/GBX2	11
GO:0022612	gland morphogenesis	10/169	111/18862	6.03959e-08	2.76095e-06	1.88453e-06	XBP1/GLI2/HOXD13/HOXB13/ESR1/ELF3/NKX2-3/BSX/CEBPB/HOXA13	10
GO:0048863	stem cell differentiation	14/169	251/18862	6.22866e-08	2.79743e-06	1.90943e-06	SOX21/SRF/TEAD2/RBPJ/TWIST1/ESR1/REST/SOX8/SNAI2/ESRRB/HES5/GBX2/MYB/TBX5	14
GO:0048839	inner ear development	12/169	176/18862	6.38401e-08	2.81777e-06	1.92331e-06	PRRX1/GLI2/OTX1/NEUROD1/RBPJ/SIX1/ESRRB/HES5/GBX2/HOXA13/TFAP2A/CEBPA	12
GO:0045665	negative regulation of neuron differentiation	8/169	63/18862	8.95939e-08	3.88746e-06	2.65345e-06	LBX1/PBX1/ISL2/ASCL1/REST/SOX8/POU4F2/HES5	8
GO:0072080	nephron tubule development	9/169	88/18862	9.36678e-08	3.99649e-06	2.72787e-06	SIX2/HOXD11/PBX1/STAT1/TFAP2B/SIX1/SOX8/HES5/HNF1B	9
GO:0051216	cartilage development	12/169	185/18862	1.10438e-07	4.60013e-06	3.13989e-06	RUNX3/RUNX2/PRRX1/UNCX/NKX3-2/GLI2/SMAD3/SIX2/SRF/HOXB3/SNAI2/HES5	12
GO:0048704	embryonic skeletal system morphogenesis	9/169	90/18862	1.14027e-07	4.60013e-06	3.13989e-06	PRRX1/SMAD3/SIX2/HOXB3/GRHL2/TWIST1/SIX1/HOXB2/TFAP2A	9
GO:0061326	renal tubule development	9/169	90/18862	1.14027e-07	4.60013e-06	3.13989e-06	SIX2/HOXD11/PBX1/STAT1/TFAP2B/SIX1/SOX8/HES5/HNF1B	9
GO:1904888	cranial skeletal system development	8/169	65/18862	1.15003e-07	4.60013e-06	3.13989e-06	PRRX1/MSX2/SMAD3/SIX2/GRHL2/TWIST1/SIX1/TFAP2A	8
GO:0007219	Notch signaling pathway	12/169	186/18862	1.17148e-07	4.61381e-06	3.14923e-06	STAT3/PBX1/STAT1/ETV2/ASCL1/ZBTB7A/GSX2/RBPJ/ELF3/SNAI2/HES5/CEBPA	12
GO:0048701	embryonic cranial skeleton morphogenesis	7/169	45/18862	1.39445e-07	5.40877e-06	3.69184e-06	PRRX1/SMAD3/SIX2/GRHL2/TWIST1/SIX1/TFAP2A	7
GO:0048608	reproductive structure development	17/169	405/18862	1.45914e-07	5.57523e-06	3.80546e-06	FOSL1/JUNB/GLI2/HOXD13/ETV2/HOXB13/VDR/RBPJ/CDX2/GRHL2/ESR1/SOX8/PPARG/CEBPB/HOXA13/NR2F2/CEBPA	17
GO:0035270	endocrine system development	10/169	122/18862	1.48416e-07	5.58744e-06	3.81379e-06	GLI2/SMAD3/ETS1/PBX1/ASCL1/NEUROD1/SRF/HOXB3/RBPJ/SIX1	10
GO:0061458	reproductive system development	17/169	408/18862	1.62046e-07	5.97703e-06	4.07972e-06	FOSL1/JUNB/GLI2/HOXD13/ETV2/HOXB13/VDR/RBPJ/CDX2/GRHL2/ESR1/SOX8/PPARG/CEBPB/HOXA13/NR2F2/CEBPA	17
GO:0030856	regulation of epithelial cell differentiation	11/169	156/18862	1.63434e-07	5.97703e-06	4.07972e-06	ETV4/GRHL1/STAT1/ETV2/ASCL1/MAFF/ZEB1/VDR/GRHL2/CEBPB/HES5	11
GO:0048565	digestive tract development	10/169	125/18862	1.86652e-07	6.72999e-06	4.59366e-06	NKX3-2/GLI2/SMAD3/SIX2/HOXD13/ASCL1/SPDEF/CDX2/MIXL1/NKX2-3	10
GO:1903706	regulation of hemopoiesis	17/169	415/18862	2.06202e-07	7.33164e-06	5.00433e-06	FOS/NFE2/RUNX3/XBP1/IRF4/GLI2/STAT3/ETS1/PRDM1/STAT1/POU4F1/SPI1/KLF13/POU4F2/CEBPB/ZBTB7B/MYB	17
GO:0021536	diencephalon development	8/169	71/18862	2.3161e-07	8.0704e-06	5.50858e-06	GLI2/ETS1/NR4A2/OTX1/RBPJ/POU4F1/RAX/GBX2	8
GO:0045667	regulation of osteoblast differentiation	10/169	128/18862	2.33285e-07	8.0704e-06	5.50858e-06	JUND/RUNX2/SMAD3/TWIST1/REST/PPARG/SNAI2/CEBPB/ATF4/CEBPA	10
GO:0021515	cell differentiation in spinal cord	7/169	49/18862	2.56135e-07	8.74273e-06	5.96749e-06	GLI2/LBX1/ISL2/ASCL1/DMRT3/GSX2/OLIG3	7
GO:0021510	spinal cord development	9/169	99/18862	2.60897e-07	8.78811e-06	5.99846e-06	UNCX/GLI2/LBX1/ISL2/ASCL1/DMRT3/GSX2/RFX4/OLIG3	9
GO:0072073	kidney epithelium development	10/169	131/18862	2.89851e-07	9.6366e-06	6.57761e-06	SMAD3/SIX2/HOXD11/PBX1/STAT1/TFAP2B/SIX1/SOX8/HES5/HNF1B	10
GO:0048469	cell maturation	11/169	166/18862	3.06453e-07	1.0058e-05	6.86522e-06	FEV/NR4A2/ASCL1/ZBTB7A/HOXB13/VSX1/LHX6/SOX8/PPARG/HES5/CEBPA	11
GO:0050673	epithelial cell proliferation	17/169	428/18862	3.1835e-07	1.02126e-05	6.97078e-06	RUNX3/XBP1/EHF/SMAD3/NKX2-8/STAT1/VDR/TWIST1/ESR1/SIX1/PPARG/SNAI2/CEBPB/NR4A1/HES5/TCF7L2/NR2F2	17
GO:0002573	myeloid leukocyte differentiation	12/169	204/18862	3.19144e-07	1.02126e-05	6.97078e-06	FOS/JUNB/IRF4/RBPJ/POU4F1/SPI1/RELB/NKX2-3/PPARG/POU4F2/CEBPB/CEBPA	12
GO:0055123	digestive system development	10/169	134/18862	3.5811e-07	1.1318e-05	7.7253e-06	NKX3-2/GLI2/SMAD3/SIX2/HOXD13/ASCL1/SPDEF/CDX2/MIXL1/NKX2-3	10
GO:0045598	regulation of fat cell differentiation	10/169	136/18862	4.11093e-07	1.28341e-05	8.76014e-06	JDP2/XBP1/RORA/SMAD3/SIX1/PPARG/CEBPB/ZBTB7C/ZBTB7B/CEBPA	10
GO:0072009	nephron epithelium development	9/169	106/18862	4.69154e-07	1.44703e-05	9.87693e-06	SIX2/HOXD11/PBX1/STAT1/TFAP2B/SIX1/SOX8/HES5/HNF1B	9
GO:0048705	skeletal system morphogenesis	12/169	213/18862	5.06982e-07	1.531e-05	1.04501e-05	PRRX1/UNCX/MSX2/NKX3-2/SMAD3/SIX2/HOXB3/GRHL2/TWIST1/SIX1/HOXB2/TFAP2A	12
GO:0046632	alpha-beta T cell differentiation	9/169	107/18862	5.08341e-07	1.531e-05	1.04501e-05	RUNX3/RORA/IRF4/STAT3/PRDM1/RELB/NKX2-3/ZBTB7B/MYB	9
GO:1901214	regulation of neuron death	14/169	302/18862	5.96269e-07	1.77494e-05	1.21151e-05	FOS/ELK1/EN1/NR4A2/HSF1/ASCL1/TFAP2B/POU4F1/SIX1/REST/CEBPB/ATF4/TFAP2A/MYB	14
GO:0042471	ear morphogenesis	9/169	110/18862	6.43408e-07	1.86613e-05	1.27376e-05	PRRX1/NKX3-2/GLI2/SIX2/OTX1/TWIST1/SIX1/GBX2/TFAP2A	9
GO:0043367	CD4-positive, alpha-beta T cell differentiation	8/169	81/18862	6.4901e-07	1.86613e-05	1.27376e-05	RUNX3/RORA/IRF4/STAT3/RELB/NKX2-3/ZBTB7B/MYB	8
GO:0071695	anatomical structure maturation	12/169	218/18862	6.49182e-07	1.86613e-05	1.27376e-05	FEV/NR4A2/ASCL1/ZBTB7A/HOXB13/VSX1/RBPJ/LHX6/SOX8/PPARG/HES5/CEBPA	12
GO:0043388	positive regulation of DNA binding	7/169	56/18862	6.56061e-07	1.86613e-05	1.27376e-05	IRF4/KLF4/NEUROD1/POU4F1/TWIST1/PPARG/POU4F2	7
GO:0035136	forelimb morphogenesis	6/169	36/18862	7.37853e-07	2.07572e-05	1.41681e-05	EN1/TFAP2B/TWIST1/HOXA13/TFAP2A/TBX5	6
GO:0051098	regulation of binding	15/169	357/18862	8.0859e-07	2.24999e-05	1.53577e-05	IRF4/MSX2/SMAD3/HMBOX1/TFAP4/HSF1/ZBTB7A/KLF4/NEUROD1/POU4F1/TWIST1/PPARG/POU4F2/TCF7L2/ZBTB7C	15
GO:0030098	lymphocyte differentiation	15/169	358/18862	8.37455e-07	2.30525e-05	1.57349e-05	RUNX3/XBP1/RORA/IRF4/GLI2/STAT3/PRDM1/ZBTB7A/SRF/RBPJ/SPI1/RELB/NKX2-3/ZBTB7B/MYB	15
GO:0021700	developmental maturation	13/169	268/18862	9.20757e-07	2.50759e-05	1.7116e-05	FEV/NR4A2/ASCL1/ZBTB7A/NFIA/HOXB13/VSX1/RBPJ/LHX6/SOX8/PPARG/HES5/CEBPA	13
GO:0046631	alpha-beta T cell activation	10/169	149/18862	9.5545e-07	2.57469e-05	1.75739e-05	RUNX3/RORA/IRF4/STAT3/PRDM1/ELF4/RELB/NKX2-3/ZBTB7B/MYB	10
GO:0060541	respiratory system development	11/169	188/18862	1.05899e-06	2.82398e-05	1.92755e-05	GLI2/NKX2-8/ASCL1/SPDEF/SRF/RBPJ/GRHL2/SIX1/MSC/CEBPA/TBX5	11
GO:0060993	kidney morphogenesis	8/169	88/18862	1.22988e-06	3.24588e-05	2.21552e-05	SIX2/HOXD11/PBX1/STAT1/SIX1/SOX8/HES5/HNF1B	8
GO:1901522	positive regulation of transcription from RNA polymerase II promoter involved in cellular response to chemical stimulus	5/169	22/18862	1.26672e-06	3.30898e-05	2.2586e-05	RUNX2/XBP1/RBPJ/ATF4/CREB3	5
GO:0060333	interferon-gamma-mediated signaling pathway	8/169	91/18862	1.58956e-06	4.11037e-05	2.8056e-05	IRF8/IRF4/STAT1/IRF3/IRF9/IRF5/PPARG/IRF2	8
GO:0001709	cell fate determination	6/169	41/18862	1.64135e-06	4.20185e-05	2.86804e-05	PRRX1/LBX1/ASCL1/BARHL2/KLF4/POU6F2	6
GO:0001824	blastocyst development	8/169	92/18862	1.72779e-06	4.33641e-05	2.95989e-05	JUNB/ETV2/KLF4/SRF/CDX2/ELF3/SPIC/POU5F1	8
GO:1901216	positive regulation of neuron death	8/169	92/18862	1.72779e-06	4.33641e-05	2.95989e-05	FOS/ELK1/ASCL1/TFAP2B/REST/ATF4/TFAP2A/MYB	8
GO:0036003	positive regulation of transcription from RNA polymerase II promoter in response to stress	5/169	24/18862	2.01509e-06	5.00638e-05	3.41718e-05	CREB3L1/HSF1/RBPJ/CEBPB/ATF4	5
GO:0045600	positive regulation of fat cell differentiation	7/169	66/18862	2.0436e-06	5.00638e-05	3.41718e-05	XBP1/SIX1/PPARG/CEBPB/ZBTB7C/ZBTB7B/CEBPA	7
GO:0072001	renal system development	13/169	288/18862	2.0534e-06	5.00638e-05	3.41718e-05	GLI2/SMAD3/SIX2/HOXD11/PBX1/STAT1/NFIA/TFAP2B/SIX1/SOX8/HES5/HNF1B/TFAP2A	13
GO:0021517	ventral spinal cord development	6/169	43/18862	2.19271e-06	5.29559e-05	3.61459e-05	GLI2/LBX1/ISL2/ASCL1/DMRT3/OLIG3	6
GO:0030217	T cell differentiation	12/169	246/18862	2.31103e-06	5.52918e-05	3.77403e-05	RUNX3/XBP1/RORA/IRF4/GLI2/STAT3/PRDM1/SRF/RELB/NKX2-3/ZBTB7B/MYB	12
GO:0060740	prostate gland epithelium morphogenesis	5/169	25/18862	2.50066e-06	5.87311e-05	4.00879e-05	GLI2/HOXD13/HOXB13/ESR1/HOXA13	5
GO:2000679	positive regulation of transcription regulatory region DNA binding	5/169	25/18862	2.50066e-06	5.87311e-05	4.00879e-05	KLF4/NEUROD1/POU4F1/TWIST1/POU4F2	5
GO:0051090	regulation of DNA-binding transcription factor activity	16/169	444/18862	2.56054e-06	5.95907e-05	4.06746e-05	FOS/FOSL1/SMAD3/STAT3/ZBTB7A/KLF4/NEUROD1/SRF/ESR2/POU4F1/TWIST1/ESR1/PPARG/POU4F2/TCF7L2/NEUROG2	16
GO:0070997	neuron death	14/169	342/18862	2.5896e-06	5.97242e-05	4.07657e-05	FOS/ELK1/EN1/NR4A2/HSF1/ASCL1/TFAP2B/POU4F1/SIX1/REST/CEBPB/ATF4/TFAP2A/MYB	14
GO:0072088	nephron epithelium morphogenesis	7/169	69/18862	2.76802e-06	6.32691e-05	4.31853e-05	SIX2/HOXD11/PBX1/STAT1/SIX1/SOX8/HES5	7
GO:0048934	peripheral nervous system neuron differentiation	4/169	12/18862	2.91091e-06	6.47995e-05	4.42299e-05	RUNX3/ETV1/ISL2/POU4F1	4
GO:0048935	peripheral nervous system neuron development	4/169	12/18862	2.91091e-06	6.47995e-05	4.42299e-05	RUNX3/ETV1/ISL2/POU4F1	4
GO:0060442	branching involved in prostate gland morphogenesis	4/169	12/18862	2.91091e-06	6.47995e-05	4.42299e-05	HOXD13/HOXB13/ESR1/HOXA13	4
GO:0003407	neural retina development	7/169	70/18862	3.05257e-06	6.73672e-05	4.59825e-05	NRL/NEUROD1/TFAP2B/VSX1/SOX8/POU4F2/TFAP2A	7
GO:0051099	positive regulation of binding	10/169	170/18862	3.16046e-06	6.9152e-05	4.72008e-05	IRF4/HMBOX1/HSF1/KLF4/NEUROD1/POU4F1/TWIST1/PPARG/POU4F2/TCF7L2	10
GO:0035710	CD4-positive, alpha-beta T cell activation	8/169	100/18862	3.25089e-06	7.05277e-05	4.81398e-05	RUNX3/RORA/IRF4/STAT3/RELB/NKX2-3/ZBTB7B/MYB	8
GO:0072028	nephron morphogenesis	7/169	71/18862	3.36112e-06	7.23064e-05	4.93539e-05	SIX2/HOXD11/PBX1/STAT1/SIX1/SOX8/HES5	7
GO:0014706	striated muscle tissue development	14/169	351/18862	3.49951e-06	7.46563e-05	5.09578e-05	FOS/SMAD3/MEOX2/MAFF/SRF/RBPJ/POU4F1/TWIST1/SIX1/SOX8/VAX1/MSC/NR2F2/TBX5	14
GO:0060512	prostate gland morphogenesis	5/169	27/18862	3.74502e-06	7.86731e-05	5.36996e-05	GLI2/HOXD13/HOXB13/ESR1/HOXA13	5
GO:0097028	dendritic cell differentiation	6/169	47/18862	3.74927e-06	7.86731e-05	5.36996e-05	IRF8/IRF4/RBPJ/SPI1/RELB/CEBPB	6
GO:0072006	nephron development	9/169	138/18862	4.28804e-06	8.9247e-05	6.0917e-05	SIX2/HOXD11/PBX1/STAT1/TFAP2B/SIX1/SOX8/HES5/HNF1B	9
GO:0021879	forebrain neuron differentiation	6/169	49/18862	4.81102e-06	9.93242e-05	6.77953e-05	UNCX/ASCL1/GSX2/LHX6/HES5/GBX2	6
GO:0035115	embryonic forelimb morphogenesis	5/169	29/18862	5.42971e-06	0.0001112	7.59016e-05	EN1/TWIST1/HOXA13/TFAP2A/TBX5	5
GO:0048592	eye morphogenesis	9/169	143/18862	5.74026e-06	0.000115709	7.89791e-05	NRL/STAT3/TFAP2B/VSX1/TWIST1/SOX8/VAX2/ATF4/TFAP2A	9
GO:0048754	branching morphogenesis of an epithelial tube	9/169	143/18862	5.74026e-06	0.000115709	7.89791e-05	GLI2/SIX2/HOXD11/PBX1/SRF/ESR1/SIX1/SOX8/GBX2	9
GO:0060537	muscle tissue development	14/169	371/18862	6.60773e-06	0.000132155	9.02041e-05	FOS/SMAD3/MEOX2/MAFF/SRF/RBPJ/POU4F1/TWIST1/SIX1/SOX8/VAX1/MSC/NR2F2/TBX5	14
GO:0001892	embryonic placenta development	7/169	79/18862	6.89925e-06	0.000136915	9.34537e-05	JUNB/RBPJ/CDX2/GRHL2/CEBPB/NR2F2/CEBPA	7
GO:0007519	skeletal muscle tissue development	9/169	147/18862	7.18799e-06	0.000141513	9.6592e-05	FOS/MEOX2/MAFF/TWIST1/SIX1/SOX8/VAX1/MSC/NR2F2	9
GO:0050678	regulation of epithelial cell proliferation	14/169	374/18862	7.24149e-06	0.000141513	9.6592e-05	RUNX3/XBP1/SMAD3/NKX2-8/STAT1/VDR/TWIST1/SIX1/PPARG/SNAI2/NR4A1/HES5/TCF7L2/NR2F2	14
GO:0072148	epithelial cell fate commitment	4/169	15/18862	7.86006e-06	0.000152438	0.000104049	NEUROD1/RBPJ/HOXA13/NR2F2	4
GO:0001822	kidney development	12/169	280/18862	8.69389e-06	0.000167341	0.000114221	GLI2/SMAD3/SIX2/HOXD11/PBX1/STAT1/TFAP2B/SIX1/SOX8/HES5/HNF1B/TFAP2A	12
GO:0009954	proximal/distal pattern formation	5/169	32/18862	9.00938e-06	0.00017212	0.000117483	EN1/GLI2/PBX1/PBX2/HES5	5
GO:0030218	erythrocyte differentiation	8/169	115/18862	9.2228e-06	0.000174892	0.000119375	STAT3/ETS1/STAT1/ETV2/ZBTB7A/SRF/SPI1/KLF13	8
GO:0021872	forebrain generation of neurons	6/169	56/18862	1.06068e-05	0.000199657	0.000136279	UNCX/ASCL1/GSX2/LHX6/HES5/GBX2	6
GO:0003007	heart morphogenesis	11/169	239/18862	1.06951e-05	0.00019985	0.000136411	SMAD3/LBX1/SRF/TEAD2/RBPJ/POU4F1/GRHL2/TWIST1/SIX1/SNAI2/TBX5	11
GO:0060485	mesenchyme development	12/169	287/18862	1.11439e-05	0.000206727	0.000141104	SMAD3/SIX2/STAT1/TEAD2/RBPJ/TWIST1/SIX1/SOX8/SNAI2/TCF7L2/GBX2/TBX5	12
GO:0043523	regulation of neuron apoptotic process	10/169	197/18862	1.1651e-05	0.000214579	0.000146465	EN1/NR4A2/ASCL1/TFAP2B/POU4F1/SIX1/CEBPB/ATF4/TFAP2A/MYB	10
GO:0045747	positive regulation of Notch signaling pathway	6/169	57/18862	1.17673e-05	0.000215173	0.00014687	STAT3/ASCL1/GSX2/RBPJ/ELF3/HES5	6
GO:0060538	skeletal muscle organ development	9/169	157/18862	1.22396e-05	0.000222222	0.000151681	FOS/MEOX2/MAFF/TWIST1/SIX1/SOX8/VAX1/MSC/NR2F2	9
GO:0034101	erythrocyte homeostasis	8/169	121/18862	1.34062e-05	0.00024025	0.000163987	STAT3/ETS1/STAT1/ETV2/ZBTB7A/SRF/SPI1/KLF13	8
GO:0021513	spinal cord dorsal/ventral patterning	4/169	17/18862	1.35141e-05	0.00024025	0.000163987	GLI2/ASCL1/DMRT3/RFX4	4
GO:0042474	middle ear morphogenesis	4/169	17/18862	1.35141e-05	0.00024025	0.000163987	PRRX1/NKX3-2/SIX2/SIX1	4
GO:0007498	mesoderm development	8/169	123/18862	1.51145e-05	0.000266849	0.000182142	SMAD3/SIX2/ETV2/KLF4/SRF/TEAD2/POU4F1/MIXL1	8
GO:0050767	regulation of neurogenesis	13/169	348/18862	1.58693e-05	0.000278256	0.000189928	ETV5/ASCL1/GSX2/SRF/HOXB3/POU4F1/REST/SOX8/PPARG/POU4F2/VAX1/HES5/MYB	13
GO:0071392	cellular response to estradiol stimulus	5/169	36/18862	1.63849e-05	0.000283415	0.000193449	HSF1/ESR2/POU4F1/ESR1/POU4F2	5
GO:2000144	positive regulation of DNA-templated transcription, initiation	5/169	36/18862	1.63849e-05	0.000283415	0.000193449	FOSL1/SRF/TWIST1/ESR1/HNF1B	5
GO:0030324	lung development	9/169	163/18862	1.65308e-05	0.000284019	0.000193862	GLI2/NKX2-8/ASCL1/SPDEF/SRF/RBPJ/GRHL2/CEBPA/TBX5	9
GO:0032355	response to estradiol	8/169	125/18862	1.70023e-05	0.000290172	0.000198061	STAT3/ETS1/HSF1/ESR2/POU4F1/ESR1/POU4F2/NR2F2	8
GO:0045604	regulation of epidermal cell differentiation	6/169	62/18862	1.92113e-05	0.000325701	0.000222312	ETV4/GRHL1/MAFF/VDR/GRHL2/HES5	6
GO:0030323	respiratory tube development	9/169	167/18862	2.00537e-05	0.000337746	0.000230534	GLI2/NKX2-8/ASCL1/SPDEF/SRF/RBPJ/GRHL2/CEBPA/TBX5	9
GO:0010002	cardioblast differentiation	4/169	19/18862	2.17027e-05	0.000360772	0.00024625	SRF/RBPJ/REST/TBX5	4
GO:0021511	spinal cord patterning	4/169	19/18862	2.17027e-05	0.000360772	0.00024625	GLI2/ASCL1/DMRT3/RFX4	4
GO:0042093	T-helper cell differentiation	6/169	64/18862	2.30864e-05	0.000381298	0.000260261	RORA/IRF4/STAT3/RELB/ZBTB7B/MYB	6
GO:0060337	type I interferon signaling pathway	7/169	95/18862	2.33269e-05	0.0003828	0.000261286	IRF8/IRF4/STAT1/IRF3/IRF9/IRF5/IRF2	7
GO:0072210	metanephric nephron development	5/169	39/18862	2.44864e-05	0.000399269	0.000272527	SIX2/STAT1/TFAP2B/SOX8/HES5	5
GO:0042110	T cell activation	15/169	474/18862	2.47703e-05	0.000401341	0.000273942	RUNX3/XBP1/RORA/IRF4/GLI2/SMAD3/STAT3/PRDM1/ELF4/SRF/RELB/NKX2-3/CEBPB/ZBTB7B/MYB	15
GO:0071357	cellular response to type I interferon	7/169	96/18862	2.49737e-05	0.000402093	0.000274455	IRF8/IRF4/STAT1/IRF3/IRF9/IRF5/IRF2	7
GO:0043011	myeloid dendritic cell differentiation	4/169	20/18862	2.69392e-05	0.000431027	0.000294204	IRF4/RBPJ/SPI1/RELB	4
GO:0002294	CD4-positive, alpha-beta T cell differentiation involved in immune response	6/169	66/18862	2.75673e-05	0.000438338	0.000299194	RORA/IRF4/STAT3/RELB/ZBTB7B/MYB	6
GO:0051960	regulation of nervous system development	14/169	422/18862	2.78758e-05	0.000440507	0.000300675	ETV5/ASCL1/GSX2/SRF/HOXB3/POU4F1/REST/SOX8/PPARG/POU4F2/VAX1/HES5/GBX2/MYB	14
GO:0002287	alpha-beta T cell activation involved in immune response	6/169	67/18862	3.00561e-05	0.000466325	0.000318297	RORA/IRF4/STAT3/RELB/ZBTB7B/MYB	6
GO:0002293	alpha-beta T cell differentiation involved in immune response	6/169	67/18862	3.00561e-05	0.000466325	0.000318297	RORA/IRF4/STAT3/RELB/ZBTB7B/MYB	6
GO:0072078	nephron tubule morphogenesis	6/169	67/18862	3.00561e-05	0.000466325	0.000318297	SIX2/HOXD11/PBX1/SIX1/SOX8/HES5	6
GO:0030850	prostate gland development	5/169	41/18862	3.14136e-05	0.000484451	0.000330669	GLI2/HOXD13/HOXB13/ESR1/HOXA13	5
GO:0060479	lung cell differentiation	4/169	21/18862	3.30458e-05	0.000500576	0.000341676	ASCL1/SPDEF/RBPJ/GRHL2	4
GO:0060487	lung epithelial cell differentiation	4/169	21/18862	3.30458e-05	0.000500576	0.000341676	ASCL1/SPDEF/RBPJ/GRHL2	4
GO:0060965	negative regulation of gene silencing by miRNA	4/169	21/18862	3.30458e-05	0.000500576	0.000341676	STAT3/ESR1/PPARG/POU5F1	4
GO:0022037	metencephalon development	7/169	101/18862	3.47129e-05	0.000519679	0.000354715	RORA/EN1/GLI2/OTX1/ASCL1/NEUROD1/GBX2	7
GO:0034340	response to type I interferon	7/169	101/18862	3.47129e-05	0.000519679	0.000354715	IRF8/IRF4/STAT1/IRF3/IRF9/IRF5/IRF2	7
GO:0031670	cellular response to nutrient	5/169	42/18862	3.54018e-05	0.000526428	0.000359322	XBP1/SRF/VDR/PPARG/SNAI2	5
GO:0045682	regulation of epidermis development	6/169	69/18862	3.5575e-05	0.000526428	0.000359322	ETV4/GRHL1/MAFF/VDR/GRHL2/HES5	6
GO:0016331	morphogenesis of embryonic epithelium	8/169	140/18862	3.85302e-05	0.000565014	0.000385659	GLI2/TEAD2/GRHL2/TWIST1/SIX1/SOX8/HES5/TFAP2A	8
GO:0048844	artery morphogenesis	6/169	70/18862	3.8624e-05	0.000565014	0.000385659	PRRX1/SRF/TFAP2B/RBPJ/SIX1/HOXA13	6
GO:0002062	chondrocyte differentiation	7/169	103/18862	3.9394e-05	0.000573004	0.000391113	RUNX3/RUNX2/NKX3-2/GLI2/SMAD3/SIX2/SNAI2	7
GO:2000142	regulation of DNA-templated transcription, initiation	5/169	43/18862	3.97714e-05	0.000575225	0.000392629	FOSL1/SRF/TWIST1/ESR1/HNF1B	5
GO:0030878	thyroid gland development	4/169	22/18862	4.01078e-05	0.000576832	0.000393726	SMAD3/SRF/HOXB3/SIX1	4
GO:0061333	renal tubule morphogenesis	6/169	71/18862	4.1879e-05	0.00059894	0.000408816	SIX2/HOXD11/PBX1/SIX1/SOX8/HES5	6
GO:0051402	neuron apoptotic process	10/169	230/18862	4.40457e-05	0.000626428	0.000427578	EN1/NR4A2/ASCL1/TFAP2B/POU4F1/SIX1/CEBPB/ATF4/TFAP2A/MYB	10
GO:0048546	digestive tract morphogenesis	5/169	44/18862	4.45472e-05	0.000627833	0.000428537	GLI2/SMAD3/SIX2/HOXD13/NKX2-3	5
GO:1902105	regulation of leukocyte differentiation	11/169	279/18862	4.4635e-05	0.000627833	0.000428537	FOS/RUNX3/XBP1/IRF4/GLI2/PRDM1/POU4F1/POU4F2/CEBPB/ZBTB7B/MYB	11
GO:0070482	response to oxygen levels	13/169	385/18862	4.53502e-05	0.000634407	0.000433024	RORA/SMAD3/ETS1/NR4A2/HSF1/SRF/RBPJ/TWIST1/REST/PPARG/POU4F2/ATF4/MYB	13
GO:0048762	mesenchymal cell differentiation	10/169	231/18862	4.56877e-05	0.000635656	0.000433877	SMAD3/SIX2/STAT1/RBPJ/TWIST1/SOX8/SNAI2/TCF7L2/GBX2/TBX5	10
GO:0060149	negative regulation of posttranscriptional gene silencing	4/169	23/18862	4.82133e-05	0.000663581	0.000452938	STAT3/ESR1/PPARG/POU5F1	4
GO:0060967	negative regulation of gene silencing by RNA	4/169	23/18862	4.82133e-05	0.000663581	0.000452938	STAT3/ESR1/PPARG/POU5F1	4
GO:0002292	T cell differentiation involved in immune response	6/169	73/18862	4.90482e-05	0.000670172	0.000457437	RORA/IRF4/STAT3/RELB/ZBTB7B/MYB	6
GO:0002262	myeloid cell homeostasis	8/169	145/18862	4.94776e-05	0.000670172	0.000457437	STAT3/ETS1/STAT1/ETV2/ZBTB7A/SRF/SPI1/KLF13	8
GO:0060041	retina development in camera-type eye	8/169	145/18862	4.94776e-05	0.000670172	0.000457437	NRL/NEUROD1/TFAP2B/VSX1/SOX8/POU4F2/VAX2/TFAP2A	8
GO:0021545	cranial nerve development	5/169	45/18862	4.97548e-05	0.000670381	0.000457579	HOXB3/POU4F1/SIX1/HOXB2/TFAP2A	5
GO:0008593	regulation of Notch signaling pathway	7/169	108/18862	5.34021e-05	0.000715756	0.00048855	STAT3/ASCL1/ZBTB7A/GSX2/RBPJ/ELF3/HES5	7
GO:0045646	regulation of erythrocyte differentiation	5/169	47/18862	6.1572e-05	0.000820961	0.00056036	STAT3/ETS1/STAT1/SPI1/KLF13	5
GO:1901654	response to ketone	9/169	193/18862	6.23437e-05	0.000826942	0.000564442	FOS/FOSL1/ELK1/HOXD13/TFAP4/HSF1/KLF4/HOXB13/PPARG	9
GO:1901215	negative regulation of neuron death	9/169	195/18862	6.75046e-05	0.000890783	0.000608018	EN1/NR4A2/HSF1/TFAP2B/POU4F1/SIX1/REST/CEBPB/ATF4	9
GO:0072273	metanephric nephron morphogenesis	4/169	25/18862	6.792e-05	0.000891259	0.000608343	SIX2/STAT1/SOX8/HES5	4
GO:0060688	regulation of morphogenesis of a branching structure	5/169	48/18862	6.8237e-05	0.000891259	0.000608343	SIX2/HOXD13/ESR1/SIX1/SOX8	5
GO:0032330	regulation of chondrocyte differentiation	5/169	49/18862	7.54445e-05	0.000969115	0.000661485	NKX3-2/GLI2/SMAD3/SIX2/SNAI2	5
GO:0030509	BMP signaling pathway	8/169	154/18862	7.57121e-05	0.000969115	0.000661485	RUNX2/SMAD3/ETV2/TFAP2B/RBPJ/PPARG/HES5/HOXA13	8
GO:1902107	positive regulation of leukocyte differentiation	8/169	154/18862	7.57121e-05	0.000969115	0.000661485	FOS/RUNX3/XBP1/GLI2/POU4F1/POU4F2/ZBTB7B/MYB	8
GO:1903708	positive regulation of hemopoiesis	8/169	154/18862	7.57121e-05	0.000969115	0.000661485	FOS/RUNX3/XBP1/GLI2/POU4F1/POU4F2/ZBTB7B/MYB	8
GO:0001704	formation of primary germ layer	7/169	115/18862	7.96313e-05	0.00100521	0.000686124	SMAD3/SIX2/ETV2/KLF4/SRF/MIXL1/POU5F1	7
GO:0048593	camera-type eye morphogenesis	7/169	115/18862	7.96313e-05	0.00100521	0.000686124	NRL/TFAP2B/VSX1/TWIST1/SOX8/ATF4/TFAP2A	7
GO:0021602	cranial nerve morphogenesis	4/169	26/18862	7.97103e-05	0.00100521	0.000686124	HOXB3/SIX1/HOXB2/TFAP2A	4
GO:0021520	spinal cord motor neuron cell fate specification	3/169	10/18862	8.09633e-05	0.00101105	0.000690111	GLI2/ISL2/OLIG3	3
GO:0060525	prostate glandular acinus development	3/169	10/18862	8.09633e-05	0.00101105	0.000690111	HOXD13/HOXB13/ESR1	3
GO:0045445	myoblast differentiation	6/169	80/18862	8.2226e-05	0.00102184	0.000697471	HINFP/SRF/RBPJ/REST/SOX8/TCF7L2	6
GO:0071383	cellular response to steroid hormone stimulus	9/169	201/18862	8.5197e-05	0.00105364	0.000719181	TFAP4/ZBTB7A/RHOXF1/ESR2/ESR1/REST/POU4F2/ESRRB/NR3C2	9
GO:0042733	embryonic digit morphogenesis	5/169	51/18862	9.16068e-05	0.00112747	0.000769571	GLI2/HOXD13/GRHL2/TWIST1/HOXD12	5
GO:0001656	metanephros development	6/169	82/18862	9.44127e-05	0.00115094	0.000785589	SIX2/STAT1/TFAP2B/SIX1/SOX8/HES5	6
GO:0002065	columnar/cuboidal epithelial cell differentiation	6/169	82/18862	9.44127e-05	0.00115094	0.000785589	NKX3-2/ASCL1/NEUROD1/SPDEF/CDX2/CEBPB	6
GO:0044706	multi-multicellular organism process	9/169	204/18862	9.54107e-05	0.00115759	0.000790131	FOS/FOSL1/JUNB/ETS1/MAFF/TEAD3/VDR/ESR1/NR2F2	9
GO:0001658	branching involved in ureteric bud morphogenesis	5/169	52/18862	0.000100623	0.00121508	0.000829369	SIX2/HOXD11/PBX1/SIX1/SOX8	5
GO:0002064	epithelial cell development	9/169	207/18862	0.000106633	0.0012816	0.000874776	FOSL2/NKX3-2/HOXB13/SPDEF/GRHL2/ESR1/SOX8/ATF4/HOXA13	9
GO:0060795	cell fate commitment involved in formation of primary germ layer	4/169	28/18862	0.000107654	0.00128783	0.000879026	SIX2/ETV2/KLF4/POU5F1	4
GO:0060379	cardiac muscle cell myoblast differentiation	3/169	11/18862	0.000110592	0.00129276	0.000882394	SRF/RBPJ/REST	3
GO:0060579	ventral spinal cord interneuron fate commitment	3/169	11/18862	0.000110592	0.00129276	0.000882394	GLI2/ASCL1/DMRT3	3
GO:0060581	cell fate commitment involved in pattern specification	3/169	11/18862	0.000110592	0.00129276	0.000882394	GLI2/ASCL1/DMRT3	3
GO:0061029	eyelid development in camera-type eye	3/169	11/18862	0.000110592	0.00129276	0.000882394	SRF/TWIST1/TFAP2A	3
GO:1990440	positive regulation of transcription from RNA polymerase II promoter in response to endoplasmic reticulum stress	3/169	11/18862	0.000110592	0.00129276	0.000882394	CREB3L1/CEBPB/ATF4	3
GO:0045637	regulation of myeloid cell differentiation	10/169	258/18862	0.000114624	0.00133381	0.000910414	FOS/NFE2/STAT3/ETS1/STAT1/POU4F1/SPI1/KLF13/POU4F2/CEBPB	10
GO:0043525	positive regulation of neuron apoptotic process	5/169	54/18862	0.000120688	0.00139802	0.000954239	ASCL1/TFAP2B/ATF4/TFAP2A/MYB	5
GO:0001657	ureteric bud development	6/169	86/18862	0.000123084	0.00140472	0.000958811	SMAD3/SIX2/HOXD11/PBX1/SIX1/SOX8	6
GO:0060021	roof of mouth development	6/169	86/18862	0.000123084	0.00140472	0.000958811	PRRX1/MEOX2/TWIST1/VAX1/MSC/TFAP2A	6
GO:0001773	myeloid dendritic cell activation	4/169	29/18862	0.00012401	0.00140472	0.000958811	IRF4/RBPJ/SPI1/RELB	4
GO:0021522	spinal cord motor neuron differentiation	4/169	29/18862	0.00012401	0.00140472	0.000958811	GLI2/LBX1/ISL2/OLIG3	4
GO:0072539	T-helper 17 cell differentiation	4/169	29/18862	0.00012401	0.00140472	0.000958811	RORA/IRF4/STAT3/ZBTB7B	4
GO:0072163	mesonephric epithelium development	6/169	87/18862	0.000131232	0.00147348	0.00100574	SMAD3/SIX2/HOXD11/PBX1/SIX1/SOX8	6
GO:0072164	mesonephric tubule development	6/169	87/18862	0.000131232	0.00147348	0.00100574	SMAD3/SIX2/HOXD11/PBX1/SIX1/SOX8	6
GO:0071772	response to BMP	8/169	167/18862	0.000133182	0.00148238	0.00101182	RUNX2/SMAD3/ETV2/TFAP2B/RBPJ/PPARG/HES5/HOXA13	8
GO:0071773	cellular response to BMP stimulus	8/169	167/18862	0.000133182	0.00148238	0.00101182	RUNX2/SMAD3/ETV2/TFAP2B/RBPJ/PPARG/HES5/HOXA13	8
GO:0060674	placenta blood vessel development	4/169	30/18862	0.000142093	0.0015612	0.00106562	FOSL1/JUNB/RBPJ/NR2F2	4
GO:0070102	interleukin-6-mediated signaling pathway	4/169	30/18862	0.000142093	0.0015612	0.00106562	STAT3/STAT1/SPI1/CEBPA	4
GO:0090183	regulation of kidney development	4/169	30/18862	0.000142093	0.0015612	0.00106562	SIX2/STAT1/SIX1/SOX8	4
GO:0051091	positive regulation of DNA-binding transcription factor activity	10/169	266/18862	0.000147121	0.00160953	0.00109861	FOSL1/SMAD3/STAT3/ZBTB7A/NEUROD1/SRF/ESR2/ESR1/PPARG/NEUROG2	10
GO:0042472	inner ear morphogenesis	6/169	90/18862	0.000158266	0.00172409	0.0011768	PRRX1/GLI2/OTX1/SIX1/GBX2/TFAP2A	6
GO:0001819	positive regulation of cytokine production	13/169	437/18862	0.000161561	0.00174998	0.00119448	IRF8/XBP1/RORA/IRF4/SMAD3/STAT3/STAT1/IRF3/IRF5/TWIST1/CEBPB/ATF4/MYB	13
GO:0003338	metanephros morphogenesis	4/169	31/18862	0.00016201	0.00174998	0.00119448	SIX2/STAT1/SOX8/HES5	4
GO:0001823	mesonephros development	6/169	91/18862	0.000168195	0.00180916	0.00123487	SMAD3/SIX2/HOXD11/PBX1/SIX1/SOX8	6
GO:0060042	retina morphogenesis in camera-type eye	5/169	58/18862	0.000169892	0.00181218	0.00123693	NRL/TFAP2B/VSX1/SOX8/TFAP2A	5
GO:0060675	ureteric bud morphogenesis	5/169	58/18862	0.000169892	0.00181218	0.00123693	SIX2/HOXD11/PBX1/SIX1/SOX8	5
GO:0033002	muscle cell proliferation	9/169	222/18862	0.000180741	0.0019199	0.00131046	STAT1/KLF4/RBPJ/SIX1/PPARG/HES5/TCF7L2/MYB/TBX5	9
GO:0072171	mesonephric tubule morphogenesis	5/169	59/18862	0.00018429	0.00194951	0.00133067	SIX2/HOXD11/PBX1/SIX1/SOX8	5
GO:0030879	mammary gland development	7/169	132/18862	0.000188642	0.00197232	0.00134624	XBP1/GLI2/ESR1/ELF3/BSX/CEBPB/ZBTB7B	7
GO:0021514	ventral spinal cord interneuron differentiation	3/169	13/18862	0.000189178	0.00197232	0.00134624	GLI2/ASCL1/DMRT3	3
GO:0014013	regulation of gliogenesis	6/169	93/18862	0.000189528	0.00197232	0.00134624	ETV5/GSX2/SOX8/PPARG/HES5/MYB	6
GO:0048709	oligodendrocyte differentiation	6/169	93/18862	0.000189528	0.00197232	0.00134624	ASCL1/GSX2/SOX8/PPARG/OLIG1/HES5	6
GO:0048545	response to steroid hormone	11/169	330/18862	0.000197339	0.00204181	0.00139367	FOS/FOSL1/TFAP4/ZBTB7A/RHOXF1/ESR2/ESR1/REST/POU4F2/ESRRB/NR3C2	11
GO:0007565	female pregnancy	8/169	177/18862	0.000198598	0.00204181	0.00139367	FOS/FOSL1/JUNB/ETS1/TEAD3/VDR/ESR1/NR2F2	8
GO:0071346	cellular response to interferon-gamma	8/169	177/18862	0.000198598	0.00204181	0.00139367	IRF8/IRF4/STAT1/IRF3/IRF9/IRF5/PPARG/IRF2	8
GO:0045666	positive regulation of neuron differentiation	6/169	94/18862	0.000200966	0.00205789	0.00140465	GLI2/ETV5/ASCL1/ZEB1/NEUROD1/REST	6
GO:0043401	steroid hormone mediated signaling pathway	7/169	134/18862	0.000206983	0.00210238	0.00143501	ZBTB7A/RHOXF1/ESR2/ESR1/POU4F2/ESRRB/NR3C2	7
GO:0035909	aorta morphogenesis	4/169	33/18862	0.000207774	0.00210238	0.00143501	SRF/TFAP2B/RBPJ/SIX1	4
GO:0072538	T-helper 17 type immune response	4/169	33/18862	0.000207774	0.00210238	0.00143501	RORA/IRF4/STAT3/ZBTB7B	4
GO:0060840	artery development	6/169	95/18862	0.000212941	0.00214618	0.00146491	PRRX1/SRF/TFAP2B/RBPJ/SIX1/HOXA13	6
GO:0048645	animal organ formation	5/169	61/18862	0.000215861	0.00215021	0.00146766	NKX3-2/GLI2/RBPJ/SIX1/TBX5	5
GO:0070059	intrinsic apoptotic signaling pathway in response to endoplasmic reticulum stress	5/169	61/18862	0.000215861	0.00215021	0.00146766	XBP1/CREB3L1/CEBPB/ATF4/CREB3	5
GO:1905330	regulation of morphogenesis of an epithelium	5/169	61/18862	0.000215861	0.00215021	0.00146766	SIX2/HOXD13/ESR1/SIX1/SOX8	5
GO:0042593	glucose homeostasis	9/169	229/18862	0.000227778	0.00226012	0.00154268	XBP1/STAT3/NEUROD1/SRF/TFAP2B/PPARG/FOXK1/TCF7L2/CEBPA	9
GO:0060428	lung epithelium development	4/169	34/18862	0.000233841	0.00231133	0.00157763	ASCL1/SPDEF/RBPJ/GRHL2	4
GO:0033500	carbohydrate homeostasis	9/169	230/18862	0.00023526	0.0023164	0.0015811	XBP1/STAT3/NEUROD1/SRF/TFAP2B/PPARG/FOXK1/TCF7L2/CEBPA	9
GO:0021783	preganglionic parasympathetic fiber development	3/169	14/18862	0.000239189	0.00234607	0.00160135	SIX1/HOXB2/TFAP2A	3
GO:0014015	positive regulation of gliogenesis	5/169	63/18862	0.000251389	0.00245632	0.0016766	ETV5/GSX2/SOX8/PPARG/MYB	5
GO:0035914	skeletal muscle cell differentiation	5/169	64/18862	0.000270737	0.00263531	0.00179877	FOS/MAFF/SIX1/SOX8/VAX1	5
GO:0031668	cellular response to extracellular stimulus	9/169	235/18862	0.000275804	0.00267446	0.00182549	FOS/FOSL1/XBP1/NR4A2/SRF/VDR/PPARG/SNAI2/ATF4	9
GO:0008544	epidermis development	13/169	463/18862	0.000283148	0.00273531	0.00186703	FOSL2/HOXC13/GLI2/ETV4/GRHL1/SOX21/MAFF/KLF4/HOXB13/VDR/RBPJ/GRHL2/HES5	13
GO:0009299	mRNA transcription	3/169	15/18862	0.000297021	0.00284785	0.00194384	HSF1/ATF4/TFCP2	3
GO:2000136	regulation of cell proliferation involved in heart morphogenesis	3/169	15/18862	0.000297021	0.00284785	0.00194384	RBPJ/SIX1/TBX5	3
GO:0062197	cellular response to chemical stress	11/169	347/18862	0.000303524	0.00289933	0.00197899	FOS/ETS1/NR4A2/ETV5/HSF1/KLF4/RELB/REST/PPARG/ATF4/MYB	11
GO:0002285	lymphocyte activation involved in immune response	8/169	189/18862	0.000309801	0.00293737	0.00200495	XBP1/RORA/IRF4/STAT3/RELB/NKX2-3/ZBTB7B/MYB	8
GO:0071248	cellular response to metal ion	8/169	189/18862	0.000309801	0.00293737	0.00200495	FOS/JUND/JUNB/MTF1/HSF1/ATF4/TFAP2A/CEBPA	8
GO:0061035	regulation of cartilage development	5/169	66/18862	0.000312803	0.00294933	0.00201311	NKX3-2/GLI2/SMAD3/SIX2/SNAI2	5
GO:0045639	positive regulation of myeloid cell differentiation	6/169	102/18862	0.000313366	0.00294933	0.00201311	FOS/STAT3/ETS1/STAT1/POU4F1/POU4F2	6
GO:0060969	negative regulation of gene silencing	4/169	37/18862	0.000326129	0.00305821	0.00208743	STAT3/ESR1/PPARG/POU5F1	4
GO:0048511	rhythmic process	10/169	294/18862	0.00032856	0.00306976	0.00209531	JUND/RORA/ETS1/TWIST1/ESR1/RELB/NFYA/PPARG/ATF4/HNF1B	10
GO:0021915	neural tube development	7/169	145/18862	0.000335326	0.00311286	0.00212473	EN1/GLI2/TEAD2/GRHL2/TWIST1/HES5/GBX2	7
GO:0046637	regulation of alpha-beta T cell differentiation	5/169	67/18862	0.000335606	0.00311286	0.00212473	RUNX3/IRF4/PRDM1/ZBTB7B/MYB	5
GO:0045580	regulation of T cell differentiation	7/169	146/18862	0.000349597	0.00323093	0.00220532	RUNX3/XBP1/IRF4/GLI2/PRDM1/ZBTB7B/MYB	7
GO:0009755	hormone-mediated signaling pathway	8/169	193/18862	0.000356557	0.00323937	0.00221108	ZBTB7A/RHOXF1/ESR2/ESR1/PPARG/POU4F2/ESRRB/NR3C2	8
GO:0001707	mesoderm formation	5/169	68/18862	0.000359644	0.00323937	0.00221108	SMAD3/SIX2/ETV2/KLF4/SRF	5
GO:0010463	mesenchymal cell proliferation	4/169	38/18862	0.000361967	0.00323937	0.00221108	PRRX1/SIX2/STAT1/SIX1	4
GO:0001710	mesodermal cell fate commitment	3/169	16/18862	0.000363163	0.00323937	0.00221108	SIX2/ETV2/KLF4	3
GO:0001829	trophectodermal cell differentiation	3/169	16/18862	0.000363163	0.00323937	0.00221108	JUNB/SRF/CDX2	3
GO:0021924	cell proliferation in external granule layer	3/169	16/18862	0.000363163	0.00323937	0.00221108	RORA/GLI2/GBX2	3
GO:0021930	cerebellar granule cell precursor proliferation	3/169	16/18862	0.000363163	0.00323937	0.00221108	RORA/GLI2/GBX2	3
GO:0048486	parasympathetic nervous system development	3/169	16/18862	0.000363163	0.00323937	0.00221108	SIX1/HOXB2/TFAP2A	3
GO:0061323	cell proliferation involved in heart morphogenesis	3/169	16/18862	0.000363163	0.00323937	0.00221108	RBPJ/SIX1/TBX5	3
GO:0061548	ganglion development	3/169	16/18862	0.000363163	0.00323937	0.00221108	ASCL1/SIX1/POU4F2	3
GO:0021675	nerve development	5/169	69/18862	0.000384962	0.00342188	0.00233566	HOXB3/POU4F1/SIX1/HOXB2/TFAP2A	5
GO:0034341	response to interferon-gamma	8/169	197/18862	0.000408912	0.0036222	0.00247239	IRF8/IRF4/STAT1/IRF3/IRF9/IRF5/PPARG/IRF2	8
GO:0048332	mesoderm morphogenesis	5/169	70/18862	0.000411603	0.00363346	0.00248008	SMAD3/SIX2/ETV2/KLF4/SRF	5
GO:0036293	response to decreased oxygen levels	11/169	360/18862	0.000414154	0.00364342	0.00248687	RORA/SMAD3/ETS1/NR4A2/HSF1/SRF/RBPJ/TWIST1/REST/ATF4/MYB	11
GO:0048872	homeostasis of number of cells	9/169	249/18862	0.000421179	0.00369253	0.00252039	STAT3/ETS1/STAT1/ETV2/ZBTB7A/SRF/SPI1/KLF13/NKX2-3	9
GO:0002076	osteoblast development	3/169	17/18862	0.000438088	0.00377611	0.00257745	JUND/GLI2/SMAD3	3
GO:0008356	asymmetric cell division	3/169	17/18862	0.000438088	0.00377611	0.00257745	ETV5/TEAD3/POU5F1	3
GO:0021534	cell proliferation in hindbrain	3/169	17/18862	0.000438088	0.00377611	0.00257745	RORA/GLI2/GBX2	3
GO:0060602	branch elongation of an epithelium	3/169	17/18862	0.000438088	0.00377611	0.00257745	HOXD13/ESR1/SIX1	3
GO:0072079	nephron tubule formation	3/169	17/18862	0.000438088	0.00377611	0.00257745	SIX1/SOX8/HES5	3
GO:0060284	regulation of cell development	13/169	485/18862	0.000440404	0.00378333	0.00258237	ETV5/ASCL1/GSX2/SRF/HOXB3/POU4F1/REST/SOX8/PPARG/POU4F2/VAX1/HES5/MYB	13
GO:0060443	mammary gland morphogenesis	4/169	40/18862	0.000441954	0.00378395	0.0025828	GLI2/ESR1/ELF3/BSX	4
GO:0033574	response to testosterone	4/169	41/18862	0.000486337	0.00415007	0.0028327	ELK1/HOXD13/HSF1/HOXB13	4
GO:0002286	T cell activation involved in immune response	6/169	111/18862	0.00049322	0.00419482	0.00286324	RORA/IRF4/STAT3/RELB/ZBTB7B/MYB	6
GO:0030278	regulation of ossification	6/169	112/18862	0.000517326	0.00434082	0.0029629	SMAD3/SIX2/PBX1/RBPJ/TWIST1/TFAP2A	6
GO:2000736	regulation of stem cell differentiation	6/169	112/18862	0.000517326	0.00434082	0.0029629	TEAD2/REST/ESRRB/HES5/MYB/TBX5	6
GO:0007221	positive regulation of transcription of Notch receptor target	3/169	18/18862	0.000522255	0.00434082	0.0029629	PBX1/STAT1/RBPJ	3
GO:0060973	cell migration involved in heart development	3/169	18/18862	0.000522255	0.00434082	0.0029629	TWIST1/SNAI2/TBX5	3
GO:0072077	renal vesicle morphogenesis	3/169	18/18862	0.000522255	0.00434082	0.0029629	SIX2/STAT1/SOX8	3
GO:0072189	ureter development	3/169	18/18862	0.000522255	0.00434082	0.0029629	NFIA/SIX1/SOX8	3
GO:1902236	negative regulation of endoplasmic reticulum stress-induced intrinsic apoptotic signaling pathway	3/169	18/18862	0.000522255	0.00434082	0.0029629	XBP1/CREB3L1/CREB3	3
GO:0007422	peripheral nervous system development	5/169	74/18862	0.000532303	0.00439401	0.0029992	RUNX3/ETV1/ISL2/POU4F1/SOX8	5
GO:0003197	endocardial cushion development	4/169	42/18862	0.000533803	0.00439401	0.0029992	RBPJ/TWIST1/SNAI2/TBX5	4
GO:0045616	regulation of keratinocyte differentiation	4/169	42/18862	0.000533803	0.00439401	0.0029992	ETV4/GRHL1/VDR/GRHL2	4
GO:0030518	intracellular steroid hormone receptor signaling pathway	6/169	113/18862	0.00054234	0.00444997	0.0030374	ZBTB7A/RHOXF1/ESR2/ESR1/POU4F2/NR3C2	6
GO:0001838	embryonic epithelial tube formation	6/169	114/18862	0.000568284	0.00464794	0.00317253	TEAD2/GRHL2/TWIST1/SIX1/SOX8/HES5	6
GO:0050680	negative regulation of epithelial cell proliferation	7/169	160/18862	0.000605713	0.00493829	0.00337071	RUNX3/NKX2-8/STAT1/VDR/PPARG/SNAI2/NR2F2	7
GO:0021516	dorsal spinal cord development	3/169	19/18862	0.000616109	0.00494432	0.00337482	UNCX/ASCL1/GSX2	3
GO:0072074	kidney mesenchyme development	3/169	19/18862	0.000616109	0.00494432	0.00337482	SIX2/STAT1/SIX1	3
GO:0072087	renal vesicle development	3/169	19/18862	0.000616109	0.00494432	0.00337482	SIX2/STAT1/SOX8	3
GO:0072234	metanephric nephron tubule development	3/169	19/18862	0.000616109	0.00494432	0.00337482	STAT1/SOX8/HES5	3
GO:0097150	neuronal stem cell population maintenance	3/169	19/18862	0.000616109	0.00494432	0.00337482	PRRX1/REST/HES5	3
GO:0060711	labyrinthine layer development	4/169	44/18862	0.000638466	0.00510773	0.00348636	JUNB/RBPJ/CDX2/GRHL2	4
GO:0090189	regulation of branching involved in ureteric bud morphogenesis	3/169	20/18862	0.00072008	0.00574269	0.00391976	SIX2/SIX1/SOX8	3
GO:0007584	response to nutrient	7/169	165/18862	0.000726822	0.00577846	0.00394418	XBP1/HSF1/ASCL1/SRF/VDR/PPARG/SNAI2	7
GO:0071241	cellular response to inorganic substance	8/169	216/18862	0.00074991	0.00594356	0.00405687	FOS/JUND/JUNB/MTF1/HSF1/ATF4/TFAP2A/CEBPA	8
GO:0035329	hippo signaling	4/169	46/18862	0.000756899	0.00594375	0.004057	TEAD4/TEAD1/TEAD3/TEAD2	4
GO:0050873	brown fat cell differentiation	4/169	46/18862	0.000756899	0.00594375	0.004057	SIX1/CEBPB/ZBTB7B/CEBPA	4
GO:0071354	cellular response to interleukin-6	4/169	46/18862	0.000756899	0.00594375	0.004057	STAT3/STAT1/SPI1/CEBPA	4
GO:0050769	positive regulation of neurogenesis	8/169	217/18862	0.000772783	0.00604992	0.00412947	ETV5/ASCL1/GSX2/SRF/SOX8/PPARG/POU4F2/MYB	8
GO:0021954	central nervous system neuron development	5/169	81/18862	0.000805139	0.00628401	0.00428925	GLI2/NR4A2/ASCL1/LHX6/GBX2	5
GO:0030857	negative regulation of epithelial cell differentiation	4/169	47/18862	0.000821581	0.00635422	0.00433717	STAT1/ZEB1/GRHL2/HES5	4
GO:0051972	regulation of telomerase activity	4/169	47/18862	0.000821581	0.00635422	0.00433717	HMBOX1/KLF4/GRHL2/PPARG	4
GO:0070169	positive regulation of biomineral tissue development	4/169	47/18862	0.000821581	0.00635422	0.00433717	SMAD3/CEBPB/ATF4/TFAP2A	4
GO:0002053	positive regulation of mesenchymal cell proliferation	3/169	21/18862	0.000834585	0.00637773	0.00435322	PRRX1/STAT1/SIX1	3
GO:0030325	adrenal gland development	3/169	21/18862	0.000834585	0.00637773	0.00435322	SMAD3/PBX1/ASCL1	3
GO:0072170	metanephric tubule development	3/169	21/18862	0.000834585	0.00637773	0.00435322	STAT1/SOX8/HES5	3
GO:2000737	negative regulation of stem cell differentiation	3/169	21/18862	0.000834585	0.00637773	0.00435322	REST/ESRRB/HES5	3
GO:0110151	positive regulation of biomineralization	4/169	48/18862	0.000890067	0.00678146	0.00462879	SMAD3/CEBPB/ATF4/TFAP2A	4
GO:0001659	temperature homeostasis	7/169	171/18862	0.000896648	0.00681133	0.00464918	IRF4/STAT3/HSF1/RBPJ/CEBPB/ATF4/ZBTB7B	7
GO:0072175	epithelial tube formation	6/169	125/18862	0.000922052	0.00698028	0.0047645	TEAD2/GRHL2/TWIST1/SIX1/SOX8/HES5	6
GO:0007409	axonogenesis	12/169	460/18862	0.000924341	0.00698028	0.0047645	GLI2/NKX2-8/NR4A2/ISL2/BARHL2/SRF/POU4F1/EVX1/POU4F2/VAX2/VAX1/GBX2	12
GO:0061053	somite development	5/169	84/18862	0.000949472	0.00714897	0.00487964	SMAD3/MEOX2/RBPJ/CDX2/SIX1	5
GO:0032727	positive regulation of interferon-alpha production	3/169	22/18862	0.000960029	0.00716262	0.00488896	STAT1/IRF3/IRF5	3
GO:0060575	intestinal epithelial cell differentiation	3/169	22/18862	0.000960029	0.00716262	0.00488896	NKX3-2/SPDEF/CDX2	3
GO:0072243	metanephric nephron epithelium development	3/169	22/18862	0.000960029	0.00716262	0.00488896	STAT1/SOX8/HES5	3
GO:0072132	mesenchyme morphogenesis	4/169	49/18862	0.000962478	0.00716262	0.00488896	SMAD3/RBPJ/TWIST1/SNAI2	4
GO:0045619	regulation of lymphocyte differentiation	7/169	175/18862	0.00102625	0.00761504	0.00519777	RUNX3/XBP1/IRF4/GLI2/PRDM1/ZBTB7B/MYB	7
GO:0070741	response to interleukin-6	4/169	50/18862	0.00103893	0.00768691	0.00524682	STAT3/STAT1/SPI1/CEBPA	4
GO:0042063	gliogenesis	9/169	283/18862	0.00104846	0.00773505	0.00527968	STAT3/ETV5/ASCL1/GSX2/SOX8/PPARG/OLIG1/HES5/MYB	9
GO:0032331	negative regulation of chondrocyte differentiation	3/169	23/18862	0.0010968	0.00806842	0.00550723	NKX3-2/GLI2/SNAI2	3
GO:0043370	regulation of CD4-positive, alpha-beta T cell differentiation	4/169	51/18862	0.00111956	0.00821223	0.00560539	RUNX3/IRF4/ZBTB7B/MYB	4
GO:0021537	telencephalon development	8/169	231/18862	0.00115629	0.00845745	0.00577276	UNCX/ASCL1/NEUROD1/GSX2/SRF/LHX6/RFX4/HES5	8
GO:0007369	gastrulation	7/169	179/18862	0.00117015	0.00851486	0.00581195	SMAD3/SIX2/ETV2/KLF4/SRF/MIXL1/POU5F1	7
GO:0045582	positive regulation of T cell differentiation	5/169	88/18862	0.00117079	0.00851486	0.00581195	RUNX3/XBP1/GLI2/ZBTB7B/MYB	5
GO:0001666	response to hypoxia	10/169	348/18862	0.00120415	0.00873263	0.0059606	RORA/SMAD3/ETS1/NR4A2/HSF1/SRF/RBPJ/TWIST1/REST/MYB	10
GO:0009991	response to extracellular stimulus	12/169	477/18862	0.0012605	0.00911547	0.00622191	FOS/FOSL1/XBP1/NR4A2/HSF1/ASCL1/SRF/VDR/PPARG/FOXK1/SNAI2/ATF4	12
GO:0043588	skin development	11/169	415/18862	0.00132581	0.00956078	0.00652586	FOSL2/HOXC13/GLI2/ETV4/GRHL1/SOX21/SRF/VDR/TFAP2B/RBPJ/GRHL2	11
GO:0030510	regulation of BMP signaling pathway	5/169	91/18862	0.00136026	0.00978166	0.00667663	TFAP2B/RBPJ/PPARG/HES5/HOXA13	5
GO:0043524	negative regulation of neuron apoptotic process	6/169	135/18862	0.00137238	0.00984115	0.00671723	EN1/NR4A2/TFAP2B/POU4F1/SIX1/CEBPB	6

## Sheet: Figure_4E
Source Data Figure_4E
ID	Description	GeneRatio	BgRatio	pvalue	p.adjust	qvalue	geneID	Count
GO:0007389	pattern specification process	51/229	426/18862	5.36907e-36	1.54038e-32	1.00373e-32	YY1/BHLHE41/BHLHE40/HOXA5/LEF1/SP8/ZIC3/ZIC1/EGR2/MEIS1/FOXC1/FOXB1/FOXG1/HEY1/EMX2/MEOX1/GATA5/TP53/HOXA10/EOMES/TBX21/FOXC2/TBR1/MEF2C/HEY2/CDX1/HIF1A/TBX20/TBX2/TBX1/GSC/TBX19/HES7/PAX1/FOXH1/BARX1/FOXD1/HOXC10/MYF6/ALX3/EMX1/MEIS2/MEIS3/HOXA2/LMX1B/NOTO/OTX2/FOXA1/TP63/RFX3/MSX1	51
GO:0045165	cell fate commitment	39/229	251/18862	6.61863e-32	9.49442e-29	6.18667e-29	MITF/SOX13/ONECUT2/FOXG1/GATA6/POU3F2/SOX9/ONECUT1/MNX1/TCF3/MGA/GATA5/TP53/EOMES/TBX21/FOXC2/TBR1/MEF2C/HEY2/TBX20/FOXP3/TBX2/TBX1/TBX4/GATA3/GATA2/NKX6-2/GSC/TBX19/GBX1/GSX1/OLIG2/HOXC10/TBX15/MYF6/PROX1/HOXA2/FOXA1/GCM1	39
GO:0003002	regionalization	41/229	326/18862	9.39988e-30	8.98942e-27	5.85761e-27	YY1/BHLHE41/BHLHE40/HOXA5/LEF1/SP8/ZIC3/EGR2/FOXC1/FOXB1/FOXG1/HEY1/EMX2/MEOX1/GATA5/TP53/HOXA10/FOXC2/TBR1/MEF2C/HEY2/CDX1/TBX20/TBX1/GSC/TBX19/HES7/PAX1/FOXH1/BARX1/FOXD1/HOXC10/MYF6/EMX1/HOXA2/LMX1B/NOTO/OTX2/FOXA1/TP63/MSX1	41
GO:0048568	embryonic organ development	44/229	412/18862	7.0508e-29	5.05719e-26	3.29532e-26	TFEB/SOX15/SP3/HOXA5/LEF1/E2F8/ZIC3/FOXI1/FOXF2/ZIC1/E2F7/FOXC1/FOXG1/SOX9/HEY1/TP53/EOMES/TBX21/FOXC2/TBR1/MEF2C/HEY2/POU3F4/HIF1A/TBX20/TBX2/TBX1/TBX4/GATA3/GATA2/GSC/FOXH1/TBX15/POU4F3/ALX3/PROX1/HOXA2/EN2/NOTO/PAX5/HESX1/MSX1/DLX6/GCM1	44
GO:0035270	endocrine system development	27/229	122/18862	1.26949e-26	7.28435e-24	4.74657e-24	HOXA5/ONECUT2/CREB1/CLOCK/PROP1/GATA6/POU3F2/SOX9/ONECUT1/GCM2/MNX1/TBX1/SOX4/GATA3/GATA2/NKX6-2/TBX19/POU1F1/PAX1/GSX1/INSM1/PDX1/NKX6-1/HESX1/PAX4/RFX3/MSX1	27
GO:0048732	gland development	39/229	413/18862	1.25592e-23	6.00539e-21	3.91318e-21	RREB1/SP3/HOXA5/LEF1/E2F8/ZIC3/ONECUT2/CREB1/DBP/SOX10/E2F7/PROP1/FOXC1/FOXB1/GATA6/POU3F2/SOX9/ONECUT1/GCM2/HNF1A/RELA/PLAG1/HIF1A/TBX2/TBX1/GATA3/GATA2/TBX19/CEBPG/POU1F1/PAX1/GSX1/INSM1/PROX1/FOXA1/PDX1/TP63/HESX1/MSX1	39
GO:0048562	embryonic organ morphogenesis	32/229	277/18862	3.63124e-22	1.48829e-19	9.69786e-20	SP3/HOXA5/ZIC3/FOXI1/FOXF2/ZIC1/FOXG1/SOX9/EOMES/TBX21/FOXC2/TBR1/MEF2C/POU3F4/HIF1A/TBX20/TBX2/TBX1/GATA3/GATA2/GSC/FOXH1/TBX15/POU4F3/ALX3/PROX1/HOXA2/NOTO/PAX5/HESX1/MSX1/DLX6	32
GO:0009952	anterior/posterior pattern specification	27/229	203/18862	1.87122e-20	6.71067e-18	4.37275e-18	YY1/BHLHE41/BHLHE40/HOXA5/LEF1/ZIC3/FOXC1/FOXB1/HEY1/EMX2/MEOX1/TP53/HOXA10/FOXC2/HEY2/CDX1/TBX1/TBX19/HES7/PAX1/FOXH1/BARX1/HOXC10/MYF6/HOXA2/OTX2/MSX1	27
GO:0031016	pancreas development	17/229	73/18862	1.44039e-17	4.59163e-15	2.99196e-15	ZIC3/ONECUT2/CLOCK/GATA6/SOX9/ONECUT1/MNX1/HNF1A/SOX4/NKX6-2/INSM1/MEIS2/PROX1/PDX1/NKX6-1/PAX4/RFX3	17
GO:0001708	cell fate specification	17/229	88/18862	4.25614e-16	1.22109e-13	7.95673e-14	POU3F2/SOX9/MNX1/MGA/EOMES/TBX21/TBR1/TBX20/TBX2/TBX1/TBX4/GSC/TBX19/OLIG2/HOXC10/TBX15/FOXA1	17
GO:1902893	regulation of pri-miRNA transcription by RNA polymerase II	14/229	51/18862	8.8103e-16	2.29789e-13	1.49733e-13	YY1/EGR1/KLF5/SOX9/TP53/RELA/FOXO3/HIF1A/JUN/GATA3/NR3C1/GATA2/SREBF2/NFATC3	14
GO:0061614	pri-miRNA transcription by RNA polymerase II	14/229	52/18862	1.19278e-15	2.85175e-13	1.85823e-13	YY1/EGR1/KLF5/SOX9/TP53/RELA/FOXO3/HIF1A/JUN/GATA3/NR3C1/GATA2/SREBF2/NFATC3	14
GO:0003007	heart morphogenesis	24/229	239/18862	1.87032e-15	4.12765e-13	2.68962e-13	ZIC3/FOXC1/GATA6/SOX9/HEY1/GATA5/TP53/EOMES/TBX21/FOXC2/TBR1/MEF2C/HEY2/HIF1A/TBX20/TBX2/TBX1/SOX4/GATA3/TBX19/FOXH1/PROX1/NOTO/MSX1	24
GO:0031018	endocrine pancreas development	13/229	45/18862	4.58168e-15	9.38917e-13	6.11809e-13	ONECUT2/CLOCK/GATA6/SOX9/ONECUT1/MNX1/SOX4/NKX6-2/INSM1/PDX1/NKX6-1/PAX4/RFX3	13
GO:0060485	mesenchyme development	25/229	287/18862	1.3037e-14	2.49354e-12	1.62482e-12	HOXA5/LEF1/FOXF2/SOX10/FOXC1/MYC/SOX9/HEY1/MEOX1/GATA5/EOMES/FOXC2/MEF2C/HEY2/HIF1A/TBX20/TBX2/TBX1/GATA3/GSC/PAX1/FOXH1/FOXD1/FOXA1/MSX1	25
GO:0007517	muscle organ development	26/229	317/18862	1.57125e-14	2.81744e-12	1.83588e-12	SOX15/LEF1/EGR3/EGR1/KLF5/FOXO4/EGR2/CREB1/FOXC1/FOXC2/MEF2C/PAX7/HEY2/TBX20/TBX1/HLF/ZBTB18/GSC/FOXH1/MYF6/PROX1/POU6F1/MEF2A/MEF2D/PAX5/MSX1	26
GO:0090596	sensory organ morphogenesis	23/229	244/18862	2.91898e-14	4.9262e-12	3.20997e-12	YY1/SP3/FOXI1/FOXF2/ZIC1/MEIS1/FOXG1/SOX9/POU3F4/HIF1A/PITX3/TBX2/TBX1/GATA3/GATA2/GSC/POU4F3/PROX1/HOXA2/HESX1/RORB/MSX1/DLX6	23
GO:0002065	columnar/cuboidal epithelial cell differentiation	15/229	82/18862	5.62043e-14	8.95834e-12	5.83736e-12	HOXA5/KLF5/CLOCK/GATA6/GATA5/HIF1A/SOX4/INSM1/EMX1/PROX1/FOXA1/PDX1/NKX6-1/TP63/RFX3	15
GO:0060537	muscle tissue development	27/229	371/18862	8.74944e-14	1.32116e-11	8.60886e-12	YY1/SOX15/LEF1/EGR1/KLF5/EGR2/CREB1/MEIS1/FOXC1/GATA6/SOX9/GATA5/FOXC2/MEF2C/HEY2/TBX20/TBX2/TBX1/HLF/ZBTB18/FOXH1/TP73/MYF6/PROX1/MEF2A/MEF2D/PAX5	27
GO:0014706	striated muscle tissue development	26/229	351/18862	1.72361e-13	2.47252e-11	1.61112e-11	YY1/SOX15/LEF1/EGR1/KLF5/EGR2/CREB1/MEIS1/FOXC1/GATA6/GATA5/FOXC2/MEF2C/HEY2/TBX20/TBX2/TBX1/HLF/ZBTB18/FOXH1/TP73/MYF6/PROX1/MEF2A/MEF2D/PAX5	26
GO:0030900	forebrain development	26/229	357/18862	2.55524e-13	3.49095e-11	2.27474e-11	LEF1/CREB1/PROP1/FOXB1/FOXG1/POU3F2/FOXP2/EMX2/POU3F3/TBR1/HIF1A/POU3F1/GATA2/GSC/TBX19/E2F1/POU1F1/GSX1/OLIG2/LMX1A/EMX1/PROX1/OTX2/PAX5/HESX1/MSX1	26
GO:0048863	stem cell differentiation	22/229	251/18862	4.81347e-13	6.27721e-11	4.0903e-11	FOXO4/SOX10/FOXC1/GATA6/SOX9/MEOX1/TCF3/TP53/FOXC2/MEF2C/HIF1A/TBX2/TBX1/GATA3/GATA2/GSC/TP73/FOXA1/PDX1/TP63/HESX1/MSX1	22
GO:1902895	positive regulation of pri-miRNA transcription by RNA polymerase II	11/229	40/18862	1.12676e-12	1.40551e-10	9.15848e-11	EGR1/KLF5/TP53/RELA/FOXO3/HIF1A/JUN/GATA3/NR3C1/GATA2/SREBF2	11
GO:0042471	ear morphogenesis	15/229	110/18862	4.91263e-12	5.87264e-10	3.82668e-10	FOXI1/ZIC1/FOXG1/SOX9/POU3F4/TBX1/GATA3/GATA2/GSC/POU4F3/PROX1/HOXA2/HESX1/MSX1/DLX6	15
GO:1903131	mononuclear cell differentiation	26/229	411/18862	6.37693e-12	7.31816e-10	4.7686e-10	YY1/SP3/LEF1/EGR3/EGR1/PKNOX1/SOX13/BATF3/NFATC2/MYC/RARA/ONECUT1/TCF3/TP53/RORC/EOMES/TBX21/FOXP3/JUN/SOX4/GATA3/CEBPG/IRF1/FOXP1/PAX1/IRF7	26
GO:0003206	cardiac chamber morphogenesis	15/229	115/18862	9.49253e-12	1.04746e-09	6.8254e-10	FOXC1/GATA6/HEY1/TP53/FOXC2/MEF2C/HEY2/HIF1A/TBX20/TBX2/TBX1/SOX4/GATA3/FOXH1/PROX1	15
GO:0048511	rhythmic process	22/229	294/18862	1.13848e-11	1.20974e-09	7.88278e-10	SP1/BHLHE41/NFIL3/BHLHE40/TEF/EGR3/NFKB2/EGR1/EGR2/CREB1/DBP/CLOCK/SREBF1/TP53/RORC/ID4/JUN/HLF/HES7/PROX1/KLF9/RORB	22
GO:0072132	mesenchyme morphogenesis	11/229	49/18862	1.29031e-11	1.3221e-09	8.61499e-10	LEF1/FOXC1/MYC/SOX9/HEY1/GATA5/FOXC2/HEY2/TBX20/TBX2/MSX1	11
GO:0045664	regulation of neuron differentiation	18/229	190/18862	1.88137e-11	1.86126e-09	1.21282e-09	TGIF2/MEIS1/FOXG1/SOX9/HEY1/TCF3/MEF2C/HEY2/NEUROD2/TCF4/GATA2/OLIG2/TP73/LMX1A/PROX1/HOXA2/FOXA1/NKX6-1	18
GO:0048608	reproductive structure development	25/229	405/18862	2.82722e-11	2.70377e-09	1.76181e-09	TFEB/SOX15/SP3/LEF1/E2F8/SRY/FOXF2/E2F7/FOXC1/GATA6/SOX9/HEY1/HOXA10/EOMES/HEY2/LHX9/PLAG1/HIF1A/GATA3/GATA2/TFAP2C/FOXA1/TP63/HESX1/GCM1	25
GO:0060562	epithelial tube morphogenesis	22/229	309/18862	3.01857e-11	2.79364e-09	1.82037e-09	HOXA5/LEF1/ZIC3/MYC/SOX9/EOMES/TBX21/FOXC2/TBR1/MEF2C/HIF1A/TBX20/TBX2/SOX4/GATA3/FOXP1/FOXH1/FOXD1/PROX1/NOTO/FOXA1/HESX1	22
GO:0061458	reproductive system development	25/229	408/18862	3.3124e-11	2.96978e-09	1.93514e-09	TFEB/SOX15/SP3/LEF1/E2F8/SRY/FOXF2/E2F7/FOXC1/GATA6/SOX9/HEY1/HOXA10/EOMES/HEY2/LHX9/PLAG1/HIF1A/GATA3/GATA2/TFAP2C/FOXA1/TP63/HESX1/GCM1	25
GO:0042063	gliogenesis	21/229	283/18862	4.00408e-11	3.48112e-09	2.26834e-09	LEF1/SOX13/EGR2/CREB1/SOX10/FOXG1/POU3F2/SOX9/GCM2/RELA/PLAG1/POU3F1/PITX3/SOX4/NKX6-2/E2F1/OLIG2/TP73/EMX1/NKX6-1/GCM1	21
GO:0001501	skeletal system development	27/229	486/18862	4.81799e-11	4.06554e-09	2.64915e-09	SP3/HOXA5/MEIS1/FOXC1/SOX9/TP53/HOXA10/FOXC2/MEF2C/CDX1/HIF1A/TBX1/TBX4/SOX4/GSC/HES7/FOXP1/PAX1/HOXC10/TBX15/ALX3/HOXA2/MEF2D/TP63/PAX5/MSX1/DLX6	27
GO:0035282	segmentation	13/229	95/18862	1.2831e-10	1.05178e-08	6.85349e-09	LEF1/EGR2/FOXC1/FOXB1/MEOX1/TP53/FOXC2/CDX1/TBX19/HES7/PAX1/MYF6/HOXA2	13
GO:0035050	embryonic heart tube development	12/229	78/18862	1.64788e-10	1.31327e-08	8.55739e-09	ZIC3/FOXC1/EOMES/TBX21/FOXC2/TBR1/MEF2C/HIF1A/TBX20/TBX2/FOXH1/NOTO	12
GO:0001892	embryonic placenta development	12/229	79/18862	1.9224e-10	1.49064e-08	9.71315e-09	TFEB/SOX15/SP3/LEF1/E2F8/E2F7/HEY1/EOMES/HEY2/HIF1A/GATA2/GCM1	12
GO:0002067	glandular epithelial cell differentiation	10/229	48/18862	2.49757e-10	1.88566e-08	1.22872e-08	HOXA5/CLOCK/GATA6/INSM1/PROX1/FOXA1/PDX1/NKX6-1/TP63/RFX3	10
GO:1903706	regulation of hemopoiesis	24/229	415/18862	2.73792e-10	2.01413e-08	1.31243e-08	TFE3/MITF/HOXA5/LEF1/EGR3/SOX13/CREB1/NFATC2/MEIS1/MYC/RARA/TBX21/MEF2C/FOXO3/HIF1A/FOXP3/JUN/SOX4/GATA3/GATA2/IRF1/FOXP1/IRF7/MEIS2	24
GO:0021515	cell differentiation in spinal cord	10/229	49/18862	3.10488e-10	2.22698e-08	1.45112e-08	SOX13/MNX1/PHOX2A/TBX20/SOX4/GATA2/GBX1/GSX1/OLIG2/HOXC10	10
GO:0001756	somitogenesis	11/229	65/18862	3.34321e-10	2.33943e-08	1.5244e-08	LEF1/FOXC1/FOXB1/MEOX1/TP53/FOXC2/CDX1/TBX19/HES7/PAX1/MYF6	11
GO:0003205	cardiac chamber development	15/229	151/18862	4.85671e-10	3.3176e-08	2.16178e-08	FOXC1/GATA6/HEY1/TP53/FOXC2/MEF2C/HEY2/HIF1A/TBX20/TBX2/TBX1/SOX4/GATA3/FOXH1/PROX1	15
GO:0030098	lymphocyte differentiation	22/229	358/18862	5.07959e-10	3.38915e-08	2.20841e-08	YY1/SP3/LEF1/EGR3/EGR1/PKNOX1/SOX13/NFATC2/RARA/ONECUT1/TCF3/TP53/RORC/EOMES/TBX21/FOXP3/SOX4/GATA3/CEBPG/IRF1/FOXP1/PAX1	22
GO:0003208	cardiac ventricle morphogenesis	11/229	69/18862	6.52836e-10	4.25679e-08	2.77377e-08	FOXC1/HEY1/FOXC2/MEF2C/HEY2/HIF1A/TBX20/SOX4/GATA3/FOXH1/PROX1	11
GO:0001701	in utero embryonic development	21/229	335/18862	8.9599e-10	5.5814e-08	3.6369e-08	TFEB/SOX15/SP3/LEF1/E2F8/MAFG/SOX10/E2F7/FOXC1/GATA6/HEY1/TP53/EOMES/HEY2/HIF1A/GATA3/GATA2/EMX1/LMX1B/MSX1/GCM1	21
GO:0021536	diencephalon development	11/229	71/18862	8.97257e-10	5.5814e-08	3.6369e-08	CREB1/PROP1/FOXB1/POU3F2/GATA2/TBX19/POU1F1/GSX1/OLIG2/HESX1/MSX1	11
GO:0042472	inner ear morphogenesis	12/229	90/18862	9.14345e-10	5.5814e-08	3.6369e-08	FOXI1/ZIC1/FOXG1/SOX9/POU3F4/TBX1/GATA3/GATA2/POU4F3/PROX1/HESX1/DLX6	12
GO:0006367	transcription initiation from RNA polymerase II promoter	16/229	187/18862	1.16164e-09	6.9432e-08	4.52427e-08	NR2C2/E2F2/E2F3/CREB1/RARA/SOX9/HNF1A/RXRB/RXRG/TP53/RORC/HEY2/NR3C1/HNF4G/NR1H4/RORB	16
GO:0021983	pituitary gland development	9/229	41/18862	1.22414e-09	7.16747e-08	4.67041e-08	CREB1/PROP1/POU3F2/GATA2/TBX19/POU1F1/GSX1/HESX1/MSX1	9
GO:0030217	T cell differentiation	18/229	246/18862	1.31135e-09	7.52454e-08	4.90308e-08	SP3/LEF1/EGR3/EGR1/PKNOX1/SOX13/NFATC2/RARA/TP53/RORC/EOMES/TBX21/FOXP3/SOX4/GATA3/IRF1/FOXP1/PAX1	18
GO:0001889	liver development	14/229	138/18862	1.41516e-09	7.96094e-08	5.18744e-08	SP3/E2F8/ZIC3/ONECUT2/DBP/E2F7/GATA6/SOX9/ONECUT1/HNF1A/RELA/CEBPG/PROX1/PDX1	14
GO:0006352	DNA-templated transcription, initiation	18/229	249/18862	1.59201e-09	8.78359e-08	5.72349e-08	NR2C2/MITF/E2F2/E2F3/CREB1/RARA/SOX9/HNF1A/RXRB/RXRG/TP53/RORC/HEY2/JUN/NR3C1/HNF4G/NR1H4/RORB	18
GO:0061008	hepaticobiliary system development	14/229	140/18862	1.71148e-09	9.26461e-08	6.03693e-08	SP3/E2F8/ZIC3/ONECUT2/DBP/E2F7/GATA6/SOX9/ONECUT1/HNF1A/RELA/CEBPG/PROX1/PDX1	14
GO:0048663	neuron fate commitment	10/229	59/18862	2.13513e-09	1.13439e-07	7.39179e-08	FOXG1/POU3F2/MNX1/TBR1/GATA2/GBX1/GSX1/OLIG2/HOXC10/FOXA1	10
GO:0021510	spinal cord development	12/229	99/18862	2.80334e-09	1.46232e-07	9.52867e-08	SOX13/FOXB1/MNX1/PHOX2A/TBX20/SOX4/GATA2/GBX1/GSX1/OLIG2/HOXC10/PROX1	12
GO:0048762	mesenchymal cell differentiation	17/229	231/18862	3.50835e-09	1.7974e-07	1.17121e-07	LEF1/FOXF2/SOX10/FOXC1/SOX9/HEY1/GATA5/EOMES/FOXC2/MEF2C/HEY2/HIF1A/TBX1/GATA3/GSC/FOXA1/MSX1	17
GO:0043583	ear development	16/229	202/18862	3.57538e-09	1.79961e-07	1.17265e-07	FOXI1/ZIC1/FOXG1/SOX9/HEY2/POU3F4/TBX1/GATA3/GATA2/GSC/POU4F3/PROX1/HOXA2/HESX1/MSX1/DLX6	16
GO:0048483	autonomic nervous system development	9/229	46/18862	3.65199e-09	1.80648e-07	1.17712e-07	EGR2/SOX10/PHOX2A/TBX1/SOX4/GATA3/INSM1/ISX/TP63	9
GO:0001947	heart looping	10/229	63/18862	4.16309e-09	2.02439e-07	1.31912e-07	ZIC3/EOMES/TBX21/TBR1/MEF2C/HIF1A/TBX20/TBX2/FOXH1/NOTO	10
GO:0071158	positive regulation of cell cycle arrest	11/229	82/18862	4.36495e-09	2.08717e-07	1.36003e-07	E2F8/E2F4/FOXO4/E2F7/GATA6/TP53/SOX4/TFDP1/E2F1/TP73/INSM1	11
GO:0021953	central nervous system neuron differentiation	15/229	178/18862	4.79896e-09	2.25708e-07	1.47074e-07	FOXG1/MNX1/TBR1/PHOX2A/TBX20/SOX4/GATA2/GBX1/GSX1/OLIG2/HOXC10/LMX1A/EMX1/PROX1/NKX6-1	15
GO:0061053	somite development	11/229	84/18862	5.66819e-09	2.62291e-07	1.70912e-07	LEF1/FOXC1/FOXB1/MEOX1/TP53/FOXC2/CDX1/TBX19/HES7/PAX1/MYF6	11
GO:0060284	regulation of cell development	24/229	485/18862	6.05089e-09	2.75556e-07	1.79555e-07	RREB1/BHLHE41/BHLHE40/EGR2/CLOCK/SOX10/CUX1/FOXG1/HEY1/TP53/RELA/HEY2/PLAG1/HIF1A/PITX3/NKX6-2/E2F1/CUX2/HES7/OLIG2/TP73/MYF6/NKX6-1/RFX3	24
GO:0007623	circadian rhythm	16/229	212/18862	7.16758e-09	3.19106e-07	2.07933e-07	BHLHE41/NFIL3/BHLHE40/EGR3/EGR1/CREB1/DBP/CLOCK/SREBF1/TP53/RORC/ID4/JUN/PROX1/KLF9/RORB	16
GO:0030522	intracellular receptor signaling pathway	18/229	274/18862	7.22965e-09	3.19106e-07	2.07933e-07	NR2C2/CLOCK/RARA/SREBF1/RXRB/RXRG/RORC/RELA/TBX1/NR3C1/FOXP1/FOXH1/IRF7/HNF4G/FOXA1/TP63/NR1H4/RORB	18
GO:0048705	skeletal system morphogenesis	16/229	213/18862	7.66716e-09	3.26687e-07	2.12873e-07	HOXA5/FOXC1/SOX9/FOXC2/MEF2C/CDX1/TBX1/TBX4/GSC/PAX1/TBX15/ALX3/HOXA2/MEF2D/PAX5/MSX1	16
GO:0071156	regulation of cell cycle arrest	12/229	108/18862	7.68311e-09	3.26687e-07	2.12873e-07	MLXIPL/E2F8/E2F4/FOXO4/E2F7/GATA6/TP53/SOX4/TFDP1/E2F1/TP73/INSM1	12
GO:0061371	determination of heart left/right asymmetry	10/229	67/18862	7.74301e-09	3.26687e-07	2.12873e-07	ZIC3/EOMES/TBX21/TBR1/MEF2C/HIF1A/TBX20/TBX2/FOXH1/NOTO	10
GO:0007219	Notch signaling pathway	15/229	186/18862	8.74949e-09	3.63801e-07	2.37057e-07	FOXC1/MYC/SOX9/ONECUT1/HEY1/GATA5/FOXC2/HEY2/TBX2/GATA2/HES7/SREBF2/FOXA1/TP63/NR1H4	15
GO:0030099	myeloid cell differentiation	22/229	419/18862	9.30741e-09	3.71764e-07	2.42246e-07	TFE3/MITF/SP3/HOXA5/LEF1/PKNOX1/BATF3/CREB1/MEIS1/MYC/RARA/MEF2C/FOXO3/HIF1A/JUN/GATA3/GATA2/CEBPE/CEBPG/FOXP1/IRF7/MEIS2	22
GO:0035107	appendage morphogenesis	13/229	134/18862	9.58273e-09	3.71764e-07	2.42246e-07	LEF1/SP8/SOX9/HOXA10/EVX2/TBX2/TBX4/SOX4/HOXC10/ALX3/TP63/MSX1/DLX6	13
GO:0035108	limb morphogenesis	13/229	134/18862	9.58273e-09	3.71764e-07	2.42246e-07	LEF1/SP8/SOX9/HOXA10/EVX2/TBX2/TBX4/SOX4/HOXC10/ALX3/TP63/MSX1/DLX6	13
GO:0055123	digestive system development	13/229	134/18862	9.58273e-09	3.71764e-07	2.42246e-07	HOXA5/ZIC3/FOXL1/KLF5/FOXF2/SOX10/GATA6/GATA5/HIF1A/TBX2/BARX1/PDX1/TP63	13
GO:1902105	regulation of leukocyte differentiation	18/229	279/18862	9.5889e-09	3.71764e-07	2.42246e-07	TFE3/MITF/LEF1/EGR3/SOX13/CREB1/NFATC2/MYC/RARA/TBX21/FOXP3/JUN/SOX4/GATA3/GATA2/IRF1/FOXP1/IRF7	18
GO:0050767	regulation of neurogenesis	20/229	348/18862	1.00794e-08	3.85569e-07	2.51241e-07	BHLHE41/BHLHE40/EGR2/SOX10/CUX1/FOXG1/HEY1/TP53/RELA/HEY2/PLAG1/HIF1A/PITX3/NKX6-2/E2F1/CUX2/HES7/OLIG2/TP73/NKX6-1	20
GO:0003143	embryonic heart tube morphogenesis	10/229	69/18862	1.03942e-08	3.9238e-07	2.5568e-07	ZIC3/EOMES/TBX21/TBR1/MEF2C/HIF1A/TBX20/TBX2/FOXH1/NOTO	10
GO:0061351	neural precursor cell proliferation	13/229	138/18862	1.37027e-08	5.10558e-07	3.32686e-07	LEF1/SOX10/FOXG1/POU3F2/EMX2/POU3F3/TP53/HIF1A/PITX3/GATA2/INSM1/EMX1/PROX1	13
GO:0001655	urogenital system development	19/229	320/18862	1.41773e-08	5.2147e-07	3.39796e-07	EGR1/GLIS2/FOXC1/MYC/FOXB1/SOX9/EMX2/POU3F3/FOXC2/MEF2C/PLAG1/SOX4/GATA3/GATA2/FOXD1/TP73/PROX1/FOXA1/TP63	19
GO:0001654	eye development	20/229	359/18862	1.69894e-08	6.16994e-07	4.0204e-07	YY1/MITF/SP3/TGIF2/FOXF2/PKNOX1/MEIS1/FOXC1/SOX9/MAX/FOXC2/HIF1A/PITX3/TBX2/GATA3/MEIS2/MEIS3/PROX1/HESX1/RORB	20
GO:0003151	outflow tract morphogenesis	10/229	73/18862	1.82052e-08	6.52884e-07	4.25427e-07	FOXC1/GATA6/FOXC2/MEF2C/HEY2/HIF1A/TBX20/TBX2/TBX1/FOXH1	10
GO:0150063	visual system development	20/229	363/18862	2.04392e-08	7.23951e-07	4.71735e-07	YY1/MITF/SP3/TGIF2/FOXF2/PKNOX1/MEIS1/FOXC1/SOX9/MAX/FOXC2/HIF1A/PITX3/TBX2/GATA3/MEIS2/MEIS3/PROX1/HESX1/RORB	20
GO:0007368	determination of left/right symmetry	12/229	119/18862	2.32495e-08	8.13449e-07	5.30053e-07	ZIC3/EOMES/TBX21/TBR1/MEF2C/HIF1A/TBX20/TBX2/TBX1/FOXH1/NOTO/RFX3	12
GO:0048880	sensory system development	20/229	369/18862	2.68418e-08	9.2782e-07	6.04578e-07	YY1/MITF/SP3/TGIF2/FOXF2/PKNOX1/MEIS1/FOXC1/SOX9/MAX/FOXC2/HIF1A/PITX3/TBX2/GATA3/MEIS2/MEIS3/PROX1/HESX1/RORB	20
GO:0001709	cell fate determination	8/229	41/18862	2.82656e-08	9.65405e-07	6.29069e-07	FOXG1/GATA6/MEF2C/TBX2/GATA3/GATA2/PROX1/HOXA2	8
GO:0060038	cardiac muscle cell proliferation	9/229	58/18862	3.11093e-08	1.05003e-06	6.84211e-07	MEIS1/FOXC1/GATA6/FOXC2/MEF2C/HEY2/TBX20/TBX2/TP73	9
GO:0060419	heart growth	11/229	100/18862	3.64604e-08	1.21634e-06	7.92578e-07	YY1/MEIS1/FOXC1/GATA6/FOXC2/MEF2C/HEY2/TBX20/TBX2/TP73/PROX1	11
GO:0002064	epithelial cell development	15/229	207/18862	3.69293e-08	1.21782e-06	7.93544e-07	HOXA5/E2F4/KLF5/ONECUT2/CLOCK/SOX9/ONECUT1/FOXC2/HIF1A/INSM1/PROX1/FOXA1/NKX6-1/TP63/RFX3	15
GO:0048738	cardiac muscle tissue development	15/229	208/18862	3.93756e-08	1.28373e-06	8.36496e-07	YY1/CREB1/MEIS1/FOXC1/GATA6/GATA5/FOXC2/MEF2C/HEY2/TBX20/TBX2/FOXH1/TP73/PROX1/MEF2A	15
GO:0048565	digestive tract development	12/229	125/18862	4.04892e-08	1.30521e-06	8.50488e-07	HOXA5/ZIC3/FOXL1/KLF5/FOXF2/SOX10/GATA6/GATA5/HIF1A/TBX2/PDX1/TP63	12
GO:0021517	ventral spinal cord development	8/229	43/18862	4.20106e-08	1.3392e-06	8.72641e-07	MNX1/PHOX2A/TBX20/SOX4/GATA2/GBX1/OLIG2/HOXC10	8
GO:0021522	spinal cord motor neuron differentiation	7/229	29/18862	4.41096e-08	1.37035e-06	8.92935e-07	MNX1/PHOX2A/TBX20/SOX4/GBX1/OLIG2/HOXC10	7
GO:0009855	determination of bilateral symmetry	12/229	126/18862	4.42768e-08	1.37035e-06	8.92935e-07	ZIC3/EOMES/TBX21/TBR1/MEF2C/HIF1A/TBX20/TBX2/TBX1/FOXH1/NOTO/RFX3	12
GO:0010001	glial cell differentiation	15/229	210/18862	4.47155e-08	1.37035e-06	8.92935e-07	LEF1/SOX13/EGR2/SOX10/POU3F2/SOX9/RELA/POU3F1/SOX4/NKX6-2/OLIG2/TP73/EMX1/NKX6-1/GCM1	15
GO:0046620	regulation of organ growth	11/229	102/18862	4.48982e-08	1.37035e-06	8.92935e-07	YY1/MEIS1/FOXC1/GATA6/FOXC2/MEF2C/HEY2/TBX20/TBX2/TP73/PROX1	11
GO:0009799	specification of symmetry	12/229	127/18862	4.83786e-08	1.45037e-06	9.45077e-07	ZIC3/EOMES/TBX21/TBR1/MEF2C/HIF1A/TBX20/TBX2/TBX1/FOXH1/NOTO/RFX3	12
GO:0043010	camera-type eye development	18/229	310/18862	4.8531e-08	1.45037e-06	9.45077e-07	YY1/MITF/SP3/TGIF2/FOXF2/PKNOX1/MEIS1/FOXC1/SOX9/MAX/FOXC2/HIF1A/PITX3/TBX2/GATA3/PROX1/HESX1/RORB	18
GO:0051960	regulation of nervous system development	21/229	422/18862	5.15735e-08	1.52541e-06	9.93972e-07	BHLHE41/BHLHE40/EGR2/SOX10/CUX1/FOXG1/HEY1/TP53/RELA/HEY2/PLAG1/HIF1A/PITX3/NKX6-2/GBX1/E2F1/CUX2/HES7/OLIG2/TP73/NKX6-1	21
GO:0014015	positive regulation of gliogenesis	9/229	63/18862	6.55981e-08	1.92042e-06	1.25137e-06	EGR2/SOX10/RELA/PLAG1/NKX6-2/E2F1/OLIG2/TP73/NKX6-1	9
GO:0070316	regulation of G0 to G1 transition	8/229	46/18862	7.32641e-08	2.12318e-06	1.38349e-06	SOX15/FOXO4/E2F6/MAX/MGA/TFDP1/E2F1/DUX4	8
GO:0051147	regulation of muscle cell differentiation	13/229	159/18862	7.47305e-08	2.12456e-06	1.38439e-06	YY1/BHLHE41/FOXO4/NFATC2/TCF3/MEF2C/HEY2/TBX1/NFATC3/MYF6/PROX1/MEF2A/MSX1	13
GO:0035914	skeletal muscle cell differentiation	9/229	64/18862	7.55334e-08	2.12456e-06	1.38439e-06	EGR1/KLF5/EGR2/MEF2C/TBX1/HLF/MYF6/MEF2D/PAX5	9
GO:0060411	cardiac septum morphogenesis	9/229	64/18862	7.55334e-08	2.12456e-06	1.38439e-06	GATA6/HEY1/TP53/HEY2/TBX20/TBX2/TBX1/SOX4/PROX1	9
GO:0045023	G0 to G1 transition	8/229	47/18862	8.73758e-08	2.4338e-06	1.58589e-06	SOX15/FOXO4/E2F6/MAX/MGA/TFDP1/E2F1/DUX4	8
GO:0001890	placenta development	12/229	135/18862	9.55436e-08	2.63572e-06	1.71746e-06	TFEB/SOX15/SP3/LEF1/E2F8/E2F7/HEY1/EOMES/HEY2/HIF1A/GATA2/GCM1	12
GO:0042692	muscle cell differentiation	19/229	362/18862	1.00427e-07	2.74404e-06	1.78805e-06	YY1/BHLHE41/KLF5/FOXO4/NFATC2/GATA6/SOX9/HEY1/TCF3/MEF2C/LBX2/HEY2/TBX2/TBX1/NFATC3/MYF6/PROX1/MEF2A/MSX1	19
GO:2001053	regulation of mesenchymal cell apoptotic process	5/229	11/18862	1.09929e-07	2.97535e-06	1.93877e-06	SOX9/POU3F4/HIF1A/TBX1/MSX1	5
GO:0045637	regulation of myeloid cell differentiation	16/229	258/18862	1.12671e-07	3.02106e-06	1.96856e-06	TFE3/MITF/HOXA5/LEF1/CREB1/MEIS1/MYC/RARA/MEF2C/FOXO3/HIF1A/JUN/GATA2/FOXP1/IRF7/MEIS2	16
GO:0003203	endocardial cushion morphogenesis	7/229	33/18862	1.15848e-07	3.04925e-06	1.98693e-06	SOX9/HEY1/GATA5/HEY2/TBX20/TBX2/MSX1	7
GO:0035909	aorta morphogenesis	7/229	33/18862	1.15848e-07	3.04925e-06	1.98693e-06	HEY1/HEY2/TBX2/TBX1/SOX4/FOXH1/PROX1	7
GO:0035265	organ growth	13/229	166/18862	1.24094e-07	3.23659e-06	2.109e-06	YY1/MEIS1/FOXC1/GATA6/SOX9/FOXC2/MEF2C/HEY2/PLAG1/TBX20/TBX2/TP73/PROX1	13
GO:0030902	hindbrain development	12/229	139/18862	1.31929e-07	3.38034e-06	2.20267e-06	LEF1/EGR2/FOXC1/TP53/TBR1/NEUROD2/PHOX2A/GATA2/LMX1A/PROX1/HOXA2/EN2	12
GO:0048736	appendage development	13/229	167/18862	1.3314e-07	3.38034e-06	2.20267e-06	LEF1/SP8/SOX9/HOXA10/EVX2/TBX2/TBX4/SOX4/HOXC10/ALX3/TP63/MSX1/DLX6	13
GO:0060173	limb development	13/229	167/18862	1.3314e-07	3.38034e-06	2.20267e-06	LEF1/SP8/SOX9/HOXA10/EVX2/TBX2/TBX4/SOX4/HOXC10/ALX3/TP63/MSX1/DLX6	13
GO:0003231	cardiac ventricle development	11/229	114/18862	1.42755e-07	3.59268e-06	2.34103e-06	FOXC1/HEY1/FOXC2/MEF2C/HEY2/HIF1A/TBX20/SOX4/GATA3/FOXH1/PROX1	11
GO:0048844	artery morphogenesis	9/229	70/18862	1.67454e-07	4.14159e-06	2.69871e-06	FOXC1/HEY1/FOXC2/HEY2/TBX2/TBX1/SOX4/FOXH1/PROX1	9
GO:0051145	smooth muscle cell differentiation	9/229	70/18862	1.67454e-07	4.14159e-06	2.69871e-06	FOXO4/NFATC2/GATA6/SOX9/HEY1/MEF2C/HEY2/TBX2/NFATC3	9
GO:0055017	cardiac muscle tissue growth	10/229	92/18862	1.72798e-07	4.23723e-06	2.76103e-06	YY1/MEIS1/FOXC1/GATA6/FOXC2/MEF2C/HEY2/TBX20/TBX2/TP73	10
GO:0097152	mesenchymal cell apoptotic process	5/229	12/18862	1.86587e-07	4.5366e-06	2.9561e-06	SOX9/POU3F4/HIF1A/TBX1/MSX1	5
GO:0014013	regulation of gliogenesis	10/229	93/18862	1.9158e-07	4.61884e-06	3.00969e-06	EGR2/SOX10/RELA/PLAG1/PITX3/NKX6-2/E2F1/OLIG2/TP73/NKX6-1	10
GO:0002573	myeloid leukocyte differentiation	14/229	204/18862	2.08336e-07	4.98097e-06	3.24566e-06	TFE3/MITF/SP3/LEF1/BATF3/CREB1/MYC/RARA/JUN/GATA3/GATA2/CEBPE/FOXP1/IRF7	14
GO:0045666	positive regulation of neuron differentiation	10/229	94/18862	2.12132e-07	5.0298e-06	3.27747e-06	TGIF2/FOXG1/TCF3/MEF2C/NEUROD2/TCF4/GATA2/PROX1/FOXA1/NKX6-1	10
GO:0014855	striated muscle cell proliferation	9/229	72/18862	2.14595e-07	5.0465e-06	3.28836e-06	MEIS1/FOXC1/GATA6/FOXC2/MEF2C/HEY2/TBX20/TBX2/TP73	9
GO:0003179	heart valve morphogenesis	8/229	53/18862	2.31329e-07	5.3958e-06	3.51596e-06	SOX9/HEY1/GATA5/MEF2C/HEY2/TBX20/SOX4/GATA3	8
GO:0048644	muscle organ morphogenesis	9/229	73/18862	2.42212e-07	5.60409e-06	3.65169e-06	FOXC1/FOXC2/HEY2/TBX20/TBX1/GSC/FOXH1/MYF6/PROX1	9
GO:0048839	inner ear development	13/229	176/18862	2.45377e-07	5.63189e-06	3.66981e-06	FOXI1/ZIC1/FOXG1/SOX9/HEY2/POU3F4/TBX1/GATA3/GATA2/POU4F3/PROX1/HESX1/DLX6	13
GO:0003279	cardiac septum development	10/229	96/18862	2.59118e-07	5.90008e-06	3.84456e-06	GATA6/HEY1/TP53/HEY2/TBX20/TBX2/TBX1/SOX4/GATA3/PROX1	10
GO:0071542	dopaminergic neuron differentiation	7/229	37/18862	2.67899e-07	6.05198e-06	3.94354e-06	HIF1A/PHOX2A/PITX3/LMX1A/LMX1B/OTX2/FOXA1	7
GO:0003309	type B pancreatic cell differentiation	6/229	24/18862	3.36243e-07	7.53657e-06	4.91092e-06	CLOCK/GATA6/INSM1/PDX1/NKX6-1/RFX3	6
GO:0001837	epithelial to mesenchymal transition	12/229	153/18862	3.76372e-07	8.37064e-06	5.4544e-06	LEF1/FOXF2/FOXC1/SOX9/HEY1/EOMES/HEY2/HIF1A/GATA3/GSC/FOXA1/MSX1	12
GO:0045787	positive regulation of cell cycle	19/229	395/18862	3.85419e-07	8.45182e-06	5.50731e-06	MLXIPL/SOX15/E2F8/E2F4/FOXO4/E2F7/RARA/FOXG1/GATA6/TP53/SOX4/TFDP1/E2F1/TP73/INSM1/MEIS2/PROX1/FOXA1/MSX1	19
GO:0060420	regulation of heart growth	9/229	77/18862	3.85915e-07	8.45182e-06	5.50731e-06	YY1/MEIS1/GATA6/MEF2C/HEY2/TBX20/TBX2/TP73/PROX1	9
GO:0002066	columnar/cuboidal epithelial cell development	7/229	39/18862	3.92055e-07	8.52125e-06	5.55254e-06	HOXA5/KLF5/CLOCK/HIF1A/INSM1/NKX6-1/RFX3	7
GO:0021543	pallium development	12/229	156/18862	4.6423e-07	1.00141e-05	6.5253e-06	LEF1/FOXG1/POU3F2/FOXP2/EMX2/POU3F3/TBR1/HIF1A/LMX1A/EMX1/PROX1/PAX5	12
GO:0032526	response to retinoic acid	10/229	103/18862	5.03273e-07	1.07753e-05	7.02132e-06	CREB1/RARA/SREBF1/GATA6/SOX9/RXRB/RXRG/TBX1/HOXA2/RORB	10
GO:0010720	positive regulation of cell development	16/229	290/18862	5.47752e-07	1.16407e-05	7.58525e-06	RREB1/EGR2/SOX10/CUX1/FOXG1/RELA/PLAG1/HIF1A/NKX6-2/E2F1/CUX2/OLIG2/TP73/MYF6/NKX6-1/RFX3	16
GO:0070317	negative regulation of G0 to G1 transition	7/229	41/18862	5.61357e-07	1.18422e-05	7.71648e-06	FOXO4/E2F6/MAX/MGA/TFDP1/E2F1/DUX4	7
GO:2000177	regulation of neural precursor cell proliferation	9/229	82/18862	6.65152e-07	1.3861e-05	9.03196e-06	SOX10/FOXG1/TP53/HIF1A/PITX3/GATA2/INSM1/EMX1/PROX1	9
GO:0003197	endocardial cushion development	7/229	42/18862	6.66717e-07	1.3861e-05	9.03196e-06	SOX9/HEY1/GATA5/HEY2/TBX20/TBX2/MSX1	7
GO:0002070	epithelial cell maturation	5/229	15/18862	6.86714e-07	1.4174e-05	9.23593e-06	HOXA5/HIF1A/FOXA1/NKX6-1/RFX3	5
GO:0003170	heart valve development	8/229	61/18862	7.07079e-07	1.44901e-05	9.4419e-06	SOX9/HEY1/GATA5/MEF2C/HEY2/TBX20/SOX4/GATA3	8
GO:0046632	alpha-beta T cell differentiation	10/229	107/18862	7.18559e-07	1.46209e-05	9.52714e-06	LEF1/RARA/RORC/EOMES/TBX21/FOXP3/GATA3/IRF1/FOXP1/PAX1	10
GO:0035883	enteroendocrine cell differentiation	6/229	28/18862	9.03697e-07	1.82585e-05	1.18974e-05	CLOCK/GATA6/INSM1/PDX1/NKX6-1/RFX3	6
GO:0045665	negative regulation of neuron differentiation	8/229	63/18862	9.10732e-07	1.8272e-05	1.19062e-05	MEIS1/FOXG1/SOX9/HEY1/OLIG2/TP73/LMX1A/HOXA2	8
GO:0030326	embryonic limb morphogenesis	10/229	112/18862	1.09779e-06	2.17211e-05	1.41537e-05	LEF1/SP8/HOXA10/TBX2/TBX4/HOXC10/ALX3/TP63/MSX1/DLX6	10
GO:0035113	embryonic appendage morphogenesis	10/229	112/18862	1.09779e-06	2.17211e-05	1.41537e-05	LEF1/SP8/HOXA10/TBX2/TBX4/HOXC10/ALX3/TP63/MSX1/DLX6	10
GO:0007050	cell cycle arrest	14/229	235/18862	1.15245e-06	2.26465e-05	1.47567e-05	MLXIPL/E2F8/E2F4/FOXO4/E2F7/MYC/GATA6/TP53/SOX4/TFDP1/E2F1/IRF1/TP73/INSM1	14
GO:0061138	morphogenesis of a branching epithelium	12/229	173/18862	1.40003e-06	2.71548e-05	1.76944e-05	HOXA5/LEF1/SOX10/MYC/SOX9/FOXC2/TBX20/FOXD1/PROX1/FOXA1/TP63/GCM1	12
GO:0048593	camera-type eye morphogenesis	10/229	115/18862	1.40081e-06	2.71548e-05	1.76944e-05	YY1/SP3/FOXF2/MEIS1/SOX9/HIF1A/PITX3/TBX2/PROX1/RORB	10
GO:0002287	alpha-beta T cell activation involved in immune response	8/229	67/18862	1.47116e-06	2.7952e-05	1.82138e-05	LEF1/RARA/RORC/EOMES/TBX21/FOXP3/GATA3/FOXP1	8
GO:0002293	alpha-beta T cell differentiation involved in immune response	8/229	67/18862	1.47116e-06	2.7952e-05	1.82138e-05	LEF1/RARA/RORC/EOMES/TBX21/FOXP3/GATA3/FOXP1	8
GO:0060415	muscle tissue morphogenesis	8/229	67/18862	1.47116e-06	2.7952e-05	1.82138e-05	FOXC1/FOXC2/HEY2/TBX20/TBX1/FOXH1/MYF6/PROX1	8
GO:0002761	regulation of myeloid leukocyte differentiation	10/229	118/18862	1.77431e-06	3.32713e-05	2.16799e-05	TFE3/MITF/LEF1/CREB1/MYC/RARA/JUN/GATA2/FOXP1/IRF7	10
GO:0051101	regulation of DNA binding	10/229	118/18862	1.77431e-06	3.32713e-05	2.16799e-05	LEF1/FOXC1/HEY1/HEY2/JUN/GATA3/E2F1/CEBPG/PDX1/MSX1	10
GO:0060043	regulation of cardiac muscle cell proliferation	7/229	49/18862	1.97511e-06	3.6796e-05	2.39767e-05	MEIS1/GATA6/MEF2C/HEY2/TBX20/TBX2/TP73	7
GO:0042493	response to drug	17/229	359/18862	1.9937e-06	3.68556e-05	2.40155e-05	CREB1/NFATC2/SOX10/MYC/SREBF1/GATA6/TGIF1/EMX2/TP53/RELA/MEF2C/JUN/GATA3/TP73/EMX1/PDX1/NKX6-1	17
GO:0007369	gastrulation	12/229	179/18862	2.004e-06	3.68556e-05	2.40155e-05	LEF1/TGIF2/FOXC1/GATA6/TP53/EOMES/FOXC2/LBX2/TBX20/GSC/TBX19/OTX2	12
GO:0055021	regulation of cardiac muscle tissue growth	8/229	70/18862	2.06382e-06	3.7714e-05	2.45749e-05	YY1/MEIS1/GATA6/MEF2C/HEY2/TBX20/TBX2/TP73	8
GO:0048872	homeostasis of number of cells	14/229	249/18862	2.28197e-06	4.14365e-05	2.70005e-05	SP3/HOXA5/PKNOX1/GLIS2/SOX9/MEF2C/FOXO3/HIF1A/FOXP3/SOX4/GATA3/GATA2/CEBPG/EMX1	14
GO:0060840	artery development	9/229	95/18862	2.32659e-06	4.19811e-05	2.73554e-05	FOXC1/HEY1/FOXC2/HEY2/TBX2/TBX1/SOX4/FOXH1/PROX1	9
GO:0007498	mesoderm development	10/229	123/18862	2.59084e-06	4.64571e-05	3.0272e-05	LEF1/FOXC1/EOMES/FOXC2/TBX20/TBX1/TBX19/HES7/FOXH1/TP63	10
GO:0050769	positive regulation of neurogenesis	13/229	217/18862	2.63114e-06	4.68866e-05	3.05519e-05	EGR2/SOX10/CUX1/FOXG1/RELA/PLAG1/HIF1A/NKX6-2/E2F1/CUX2/OLIG2/TP73/NKX6-1	13
GO:0002292	T cell differentiation involved in immune response	8/229	73/18862	2.84829e-06	5.04429e-05	3.28692e-05	LEF1/RARA/RORC/EOMES/TBX21/FOXP3/GATA3/FOXP1	8
GO:0001763	morphogenesis of a branching structure	12/229	186/18862	2.99063e-06	5.26388e-05	3.43001e-05	HOXA5/LEF1/SOX10/MYC/SOX9/FOXC2/TBX20/FOXD1/PROX1/FOXA1/TP63/GCM1	12
GO:0060541	respiratory system development	12/229	188/18862	3.34173e-06	5.846e-05	3.80932e-05	SP3/HOXA5/LEF1/ZIC3/CREB1/SREBF1/GATA6/SOX9/TBX4/PROX1/FOXA1/HESX1	12
GO:0003215	cardiac right ventricle morphogenesis	5/229	20/18862	3.37385e-06	5.8664e-05	3.82262e-05	HEY2/TBX20/SOX4/GATA3/FOXH1	5
GO:0009953	dorsal/ventral pattern formation	8/229	77/18862	4.27683e-06	7.39171e-05	4.81652e-05	SP8/FOXG1/TBX20/GSC/HOXA2/LMX1B/NOTO/FOXA1	8
GO:0048485	sympathetic nervous system development	5/229	21/18862	4.3845e-06	7.4026e-05	4.82362e-05	PHOX2A/SOX4/GATA3/INSM1/TP63	5
GO:0060479	lung cell differentiation	5/229	21/18862	4.3845e-06	7.4026e-05	4.82362e-05	HOXA5/CREB1/GATA6/SOX9/FOXA1	5
GO:0060487	lung epithelial cell differentiation	5/229	21/18862	4.3845e-06	7.4026e-05	4.82362e-05	HOXA5/CREB1/GATA6/SOX9/FOXA1	5
GO:0035904	aorta development	7/229	55/18862	4.38634e-06	7.4026e-05	4.82362e-05	HEY1/HEY2/TBX2/TBX1/SOX4/FOXH1/PROX1	7
GO:0070997	neuron death	16/229	342/18862	4.68861e-06	7.86645e-05	5.12587e-05	EGR1/REL/CREB1/FOXB1/MAX/TP53/MEF2C/FOXO3/HIF1A/PITX3/JUN/GATA3/POU4F3/MYBL2/EN2/TP63	16
GO:0030879	mammary gland development	10/229	132/18862	4.90093e-06	8.17487e-05	5.32684e-05	RREB1/HOXA5/LEF1/CREB1/FOXB1/SOX9/HIF1A/TBX2/GATA3/MSX1	10
GO:0006977	DNA damage response, signal transduction by p53 class mediator resulting in cell cycle arrest	7/229	56/18862	4.96163e-06	8.21811e-05	5.35501e-05	E2F8/E2F4/E2F7/TP53/SOX4/TFDP1/E2F1	7
GO:0051402	neuron apoptotic process	13/229	230/18862	4.98414e-06	8.21811e-05	5.35501e-05	FOXB1/MAX/TP53/MEF2C/FOXO3/HIF1A/PITX3/JUN/GATA3/POU4F3/MYBL2/EN2/TP63	13
GO:0021537	telencephalon development	13/229	231/18862	5.22535e-06	8.56659e-05	5.58209e-05	LEF1/FOXB1/FOXG1/POU3F2/FOXP2/EMX2/POU3F3/TBR1/HIF1A/LMX1A/EMX1/PROX1/PAX5	13
GO:0072431	signal transduction involved in mitotic G1 DNA damage checkpoint	7/229	57/18862	5.59835e-06	9.05526e-05	5.90051e-05	E2F8/E2F4/E2F7/TP53/SOX4/TFDP1/E2F1	7
GO:1902400	intracellular signal transduction involved in G1 DNA damage checkpoint	7/229	57/18862	5.59835e-06	9.05526e-05	5.90051e-05	E2F8/E2F4/E2F7/TP53/SOX4/TFDP1/E2F1	7
GO:0060575	intestinal epithelial cell differentiation	5/229	22/18862	5.61811e-06	9.05526e-05	5.90051e-05	HOXA5/KLF5/GATA6/GATA5/HIF1A	5
GO:0021987	cerebral cortex development	9/229	107/18862	6.25968e-06	9.99517e-05	6.51297e-05	FOXG1/POU3F2/FOXP2/EMX2/POU3F3/TBR1/HIF1A/EMX1/PAX5	9
GO:0043367	CD4-positive, alpha-beta T cell differentiation	8/229	81/18862	6.27094e-06	9.99517e-05	6.51297e-05	LEF1/RARA/RORC/TBX21/FOXP3/GATA3/FOXP1/PAX1	8
GO:0046643	regulation of gamma-delta T cell activation	4/229	11/18862	6.53252e-06	0.000103546	6.74716e-05	LEF1/EGR3/SOX13/SOX4	4
GO:0071383	cellular response to steroid hormone stimulus	12/229	201/18862	6.64743e-06	0.000104788	6.82813e-05	LEF1/CLOCK/SOX10/HEY1/RXRB/RXRG/NR3C1/FOXP1/FOXH1/KLF9/FOXA1/TP63	12
GO:1902402	signal transduction involved in mitotic DNA damage checkpoint	7/229	59/18862	7.07668e-06	0.000110231	7.18275e-05	E2F8/E2F4/E2F7/TP53/SOX4/TFDP1/E2F1	7
GO:1902403	signal transduction involved in mitotic DNA integrity checkpoint	7/229	59/18862	7.07668e-06	0.000110231	7.18275e-05	E2F8/E2F4/E2F7/TP53/SOX4/TFDP1/E2F1	7
GO:0060706	cell differentiation involved in embryonic placenta development	5/229	23/18862	7.10793e-06	0.000110231	7.18275e-05	SOX15/E2F8/E2F7/EOMES/GCM1	5
GO:0002286	T cell activation involved in immune response	9/229	111/18862	8.45955e-06	0.000130486	8.50264e-05	LEF1/RARA/TP53/RORC/EOMES/TBX21/FOXP3/GATA3/FOXP1	9
GO:0051090	regulation of DNA-binding transcription factor activity	18/229	444/18862	8.66211e-06	0.000132896	8.65967e-05	BHLHE40/NFKB2/GLIS2/CLOCK/NFKB1/TCF3/EOMES/RELA/NEUROD2/FOXP3/JUN/TFDP1/CEBPG/FOXH1/PROX1/FOXA1/NKX6-1/NR1H4	18
GO:0048638	regulation of developmental growth	15/229	319/18862	8.80257e-06	0.00013387	8.72312e-05	YY1/SOX15/CREB1/MEIS1/FOXC1/GATA6/POU3F2/FOXC2/MEF2C/HEY2/TBX20/TBX2/TP73/PROX1/NKX6-1	15
GO:0070542	response to fatty acid	7/229	61/18862	8.86556e-06	0.00013387	8.72312e-05	CREB1/SREBF1/SOX9/FOXO3/E2F1/PDX1/NR1H4	7
GO:0072413	signal transduction involved in mitotic cell cycle checkpoint	7/229	61/18862	8.86556e-06	0.00013387	8.72312e-05	E2F8/E2F4/E2F7/TP53/SOX4/TFDP1/E2F1	7
GO:1905314	semi-lunar valve development	6/229	41/18862	9.4537e-06	0.000142003	9.25311e-05	SOX9/HEY1/GATA5/HEY2/TBX20/GATA3	6
GO:0003207	cardiac chamber formation	4/229	12/18862	9.70548e-06	0.000143531	9.35265e-05	MEF2C/TBX20/TBX2/SOX4	4
GO:0042492	gamma-delta T cell differentiation	4/229	12/18862	9.70548e-06	0.000143531	9.35265e-05	LEF1/EGR3/SOX13/SOX4	4
GO:0055012	ventricular cardiac muscle cell differentiation	4/229	12/18862	9.70548e-06	0.000143531	9.35265e-05	MEF2C/HEY2/PROX1/MEF2A	4
GO:0031571	mitotic G1 DNA damage checkpoint	7/229	62/18862	9.89165e-06	0.000145534	9.48317e-05	E2F8/E2F4/E2F7/TP53/SOX4/TFDP1/E2F1	7
GO:0048592	eye morphogenesis	10/229	143/18862	9.98739e-06	0.000146193	9.5261e-05	YY1/SP3/FOXF2/MEIS1/SOX9/HIF1A/PITX3/TBX2/PROX1/RORB	10
GO:0045687	positive regulation of glial cell differentiation	6/229	42/18862	1.09182e-05	0.000158794	0.000103472	EGR2/RELA/NKX6-2/OLIG2/TP73/NKX6-1	6
GO:0044783	G1 DNA damage checkpoint	7/229	63/18862	1.10143e-05	0.000158794	0.000103472	E2F8/E2F4/E2F7/TP53/SOX4/TFDP1/E2F1	7
GO:0044819	mitotic G1/S transition checkpoint	7/229	63/18862	1.10143e-05	0.000158794	0.000103472	E2F8/E2F4/E2F7/TP53/SOX4/TFDP1/E2F1	7
GO:0045580	regulation of T cell differentiation	10/229	146/18862	1.199e-05	0.000171997	0.000112075	LEF1/EGR3/SOX13/NFATC2/RARA/TBX21/FOXP3/SOX4/GATA3/IRF1	10
GO:0072001	renal system development	14/229	288/18862	1.21433e-05	0.000172994	0.000112725	EGR1/GLIS2/FOXC1/MYC/SOX9/EMX2/POU3F3/FOXC2/MEF2C/SOX4/GATA3/FOXD1/TP73/PROX1	14
GO:0042093	T-helper cell differentiation	7/229	64/18862	1.22404e-05	0.000172994	0.000112725	LEF1/RARA/RORC/TBX21/FOXP3/GATA3/FOXP1	7
GO:0051148	negative regulation of muscle cell differentiation	7/229	64/18862	1.22404e-05	0.000172994	0.000112725	YY1/BHLHE41/FOXO4/NFATC2/HEY2/NFATC3/MSX1	7
GO:0035094	response to nicotine	6/229	43/18862	1.25609e-05	0.000175791	0.000114548	CREB1/NFKB1/RELA/PDX1/NKX6-1/MSX1	6
GO:2000142	regulation of DNA-templated transcription, initiation	6/229	43/18862	1.25609e-05	0.000175791	0.000114548	MITF/CREB1/HNF1A/TP53/HEY2/JUN	6
GO:0007519	skeletal muscle tissue development	10/229	147/18862	1.27303e-05	0.000177298	0.000115529	EGR1/KLF5/EGR2/MEF2C/TBX1/HLF/ZBTB18/MYF6/MEF2D/PAX5	10
GO:0048706	embryonic skeletal system development	9/229	117/18862	1.2984e-05	0.000179956	0.000117262	SP3/HOXA5/FOXC2/TBX1/GSC/TBX15/ALX3/HOXA2/PAX5	9
GO:0048545	response to steroid hormone	15/229	330/18862	1.31608e-05	0.00018153	0.000118287	LEF1/CLOCK/SOX10/SREBF1/HEY1/RXRB/RXRG/RELA/NR3C1/FOXP1/FOXH1/KLF9/FOXA1/PDX1/TP63	15
GO:1900739	regulation of protein insertion into mitochondrial membrane involved in apoptotic signaling pathway	5/229	26/18862	1.34885e-05	0.000184279	0.000120078	TP53/TFDP1/E2F1/TP73/TP63	5
GO:1900740	positive regulation of protein insertion into mitochondrial membrane involved in apoptotic signaling pathway	5/229	26/18862	1.34885e-05	0.000184279	0.000120078	TP53/TFDP1/E2F1/TP73/TP63	5
GO:1904888	cranial skeletal system development	7/229	65/18862	1.35774e-05	0.000184614	0.000120297	FOXC2/TBX1/TBX15/ALX3/HOXA2/TP63/PAX5	7
GO:0014033	neural crest cell differentiation	8/229	90/18862	1.37628e-05	0.000185378	0.000120794	SOX10/FOXC1/SOX9/FOXC2/MEF2C/HIF1A/TBX1/GSC	8
GO:0048704	embryonic skeletal system morphogenesis	8/229	90/18862	1.37628e-05	0.000185378	0.000120794	HOXA5/FOXC2/TBX1/GSC/TBX15/ALX3/HOXA2/PAX5	8
GO:0071599	otic vesicle development	4/229	13/18862	1.38856e-05	0.000186158	0.000121303	SOX9/GATA3/PROX1/HESX1	4
GO:0046631	alpha-beta T cell activation	10/229	149/18862	1.43297e-05	0.000191218	0.0001246	LEF1/RARA/RORC/EOMES/TBX21/FOXP3/GATA3/IRF1/FOXP1/PAX1	10
GO:0060421	positive regulation of heart growth	6/229	44/18862	1.43977e-05	0.000191236	0.000124612	GATA6/MEF2C/HEY2/TBX20/TBX2/PROX1	6
GO:0050810	regulation of steroid biosynthetic process	8/229	91/18862	1.49333e-05	0.000197436	0.000128652	SP1/EGR1/NFKB1/SREBF1/SREBF2/NFYB/PROX1/NR1H4	8
GO:0002294	CD4-positive, alpha-beta T cell differentiation involved in immune response	7/229	66/18862	1.5033e-05	0.000197842	0.000128916	LEF1/RARA/RORC/TBX21/FOXP3/GATA3/FOXP1	7
GO:0048701	embryonic cranial skeleton morphogenesis	6/229	45/18862	1.64455e-05	0.000214464	0.000139747	FOXC2/TBX1/TBX15/ALX3/HOXA2/PAX5	6
GO:0090102	cochlea development	6/229	45/18862	1.64455e-05	0.000214464	0.000139747	SOX9/HEY2/POU3F4/TBX1/GATA3/GATA2	6
GO:0033002	muscle cell proliferation	12/229	222/18862	1.80969e-05	0.000234932	0.000153084	MEIS1/FOXC1/GATA6/FOXC2/MEF2C/HEY2/TBX20/JUN/TBX2/FOXP1/TP73/MEF2D	12
GO:0019218	regulation of steroid metabolic process	9/229	122/18862	1.8196e-05	0.000235155	0.00015323	SP1/EGR1/NFKB1/SREBF1/RORC/SREBF2/NFYB/PROX1/NR1H4	9
GO:0003188	heart valve formation	4/229	14/18862	1.92549e-05	0.000245521	0.000159985	SOX9/HEY1/HEY2/TBX20	4
GO:0021542	dentate gyrus development	4/229	14/18862	1.92549e-05	0.000245521	0.000159985	LEF1/EMX2/LMX1A/PROX1	4
GO:1902894	negative regulation of pri-miRNA transcription by RNA polymerase II	4/229	14/18862	1.92549e-05	0.000245521	0.000159985	YY1/SOX9/RELA/NFATC3	4
GO:0050673	epithelial cell proliferation	17/229	428/18862	2.01299e-05	0.000255543	0.000166515	RREB1/SP1/HOXA5/EGR3/MYC/SOX9/MEF2C/HIF1A/THAP1/TBX1/GATA3/GATA2/PROX1/KLF9/NKX6-1/TP63/DLX6	17
GO:0042110	T cell activation	18/229	474/18862	2.0836e-05	0.000263342	0.000171597	SP3/LEF1/EGR3/EGR1/PKNOX1/SOX13/NFATC2/RARA/TP53/RORC/EOMES/TBX21/FOXP3/SOX4/GATA3/IRF1/FOXP1/PAX1	18
GO:0051962	positive regulation of nervous system development	13/229	263/18862	2.09388e-05	0.00026348	0.000171687	EGR2/SOX10/CUX1/FOXG1/RELA/PLAG1/HIF1A/NKX6-2/E2F1/CUX2/OLIG2/TP73/NKX6-1	13
GO:0007568	aging	14/229	304/18862	2.21994e-05	0.000278122	0.000181228	NFKB2/FOXO4/CREB1/MNT/SREBF1/FOXG1/TP53/RELA/PITX3/JUN/TBX2/PDX1/TP63/PAX5	14
GO:0060538	skeletal muscle organ development	10/229	157/18862	2.25805e-05	0.000281667	0.000183538	EGR1/KLF5/EGR2/MEF2C/TBX1/HLF/ZBTB18/MYF6/MEF2D/PAX5	10
GO:0035019	somatic stem cell population maintenance	7/229	71/18862	2.43854e-05	0.000302865	0.00019735	ZIC3/MYC/SOX9/SOX4/GATA2/FOXP1/TP63	7
GO:0021761	limbic system development	8/229	98/18862	2.57121e-05	0.000317965	0.00020719	LEF1/FOXB1/POU3F2/EMX2/TBR1/GSX1/LMX1A/PROX1	8
GO:1903747	regulation of establishment of protein localization to mitochondrion	7/229	72/18862	2.67356e-05	0.000329203	0.000214513	SREBF1/TP53/TFDP1/E2F1/SREBF2/TP73/TP63	7
GO:0001844	protein insertion into mitochondrial membrane involved in apoptotic signaling pathway	5/229	30/18862	2.80878e-05	0.00034291	0.000223444	TP53/TFDP1/E2F1/TP73/TP63	5
GO:0060045	positive regulation of cardiac muscle cell proliferation	5/229	30/18862	2.80878e-05	0.00034291	0.000223444	GATA6/MEF2C/HEY2/TBX20/TBX2	5
GO:0072401	signal transduction involved in DNA integrity checkpoint	7/229	73/18862	2.92691e-05	0.000354316	0.000230877	E2F8/E2F4/E2F7/TP53/SOX4/TFDP1/E2F1	7
GO:0072422	signal transduction involved in DNA damage checkpoint	7/229	73/18862	2.92691e-05	0.000354316	0.000230877	E2F8/E2F4/E2F7/TP53/SOX4/TFDP1/E2F1	7
GO:0035710	CD4-positive, alpha-beta T cell activation	8/229	100/18862	2.978e-05	0.000358987	0.00023392	LEF1/RARA/RORC/TBX21/FOXP3/GATA3/FOXP1/PAX1	8
GO:2000179	positive regulation of neural precursor cell proliferation	6/229	50/18862	3.05022e-05	0.000366154	0.00023859	SOX10/FOXG1/HIF1A/PITX3/INSM1/PROX1	6
GO:0030324	lung development	10/229	163/18862	3.11845e-05	0.000372785	0.000242911	SP3/HOXA5/ZIC3/CREB1/SREBF1/GATA6/SOX9/TBX4/PROX1/FOXA1	10
GO:0007611	learning or memory	12/229	235/18862	3.17401e-05	0.000377852	0.000246213	FOXO6/EGR2/CREB1/FOXB1/TBR1/MEF2C/HIF1A/NEUROD2/JUN/CUX2/LMX1A/MEIS2	12
GO:0007422	peripheral nervous system development	7/229	74/18862	3.19968e-05	0.000379334	0.000247179	EGR3/ONECUT2/EGR2/SOX10/POU3F2/RELA/POU3F1	7
GO:0003180	aortic valve morphogenesis	5/229	31/18862	3.31599e-05	0.000391505	0.000255109	SOX9/GATA5/HEY2/TBX20/GATA3	5
GO:0044773	mitotic DNA damage checkpoint	8/229	102/18862	3.43732e-05	0.000404167	0.00026336	E2F8/E2F4/FOXO4/E2F7/TP53/SOX4/TFDP1/E2F1	8
GO:0072395	signal transduction involved in cell cycle checkpoint	7/229	76/18862	3.8081e-05	0.000444035	0.000289338	E2F8/E2F4/E2F7/TP53/SOX4/TFDP1/E2F1	7
GO:0043392	negative regulation of DNA binding	6/229	52/18862	3.82961e-05	0.000444035	0.000289338	LEF1/HEY1/HEY2/JUN/E2F1/MSX1	6
GO:0030323	respiratory tube development	10/229	167/18862	3.8364e-05	0.000444035	0.000289338	SP3/HOXA5/ZIC3/CREB1/SREBF1/GATA6/SOX9/TBX4/PROX1/FOXA1	10
GO:0043401	steroid hormone mediated signaling pathway	9/229	134/18862	3.83829e-05	0.000444035	0.000289338	LEF1/CLOCK/RXRB/RXRG/NR3C1/FOXP1/FOXH1/FOXA1/TP63	9
GO:0050679	positive regulation of epithelial cell proliferation	11/229	203/18862	3.96174e-05	0.000456475	0.000297445	RREB1/SP1/EGR3/MYC/SOX9/HIF1A/TBX1/GATA2/PROX1/TP63/DLX6	11
GO:0001822	kidney development	13/229	280/18862	4.01818e-05	0.000461127	0.000300476	EGR1/GLIS2/FOXC1/MYC/SOX9/POU3F3/FOXC2/MEF2C/SOX4/GATA3/FOXD1/TP73/PROX1	13
GO:0045598	regulation of fat cell differentiation	9/229	136/18862	4.3127e-05	0.000492954	0.000321215	RREB1/TFE3/KLF5/SOX13/CREB1/RORC/GATA3/GATA2/E2F1	9
GO:0061448	connective tissue development	12/229	243/18862	4.39878e-05	0.000500797	0.000326325	HOXA5/EGR1/SOX9/RORC/FOXC2/MEF2C/HIF1A/FOXD1/MEF2D/FOXA1/NR1H4/MSX1	12
GO:0042474	middle ear morphogenesis	4/229	17/18862	4.44875e-05	0.000502499	0.000327434	TBX1/GSC/HOXA2/MSX1	4
GO:0042693	muscle cell fate commitment	4/229	17/18862	4.44875e-05	0.000502499	0.000327434	MEF2C/TBX2/TBX1/MYF6	4
GO:0030330	DNA damage response, signal transduction by p53 class mediator	8/229	106/18862	4.53489e-05	0.000504989	0.000329057	E2F8/E2F4/E2F7/TP53/SOX4/TFDP1/E2F1/MSX1	8
GO:0044774	mitotic DNA integrity checkpoint	8/229	106/18862	4.53489e-05	0.000504989	0.000329057	E2F8/E2F4/FOXO4/E2F7/TP53/SOX4/TFDP1/E2F1	8
GO:0072009	nephron epithelium development	8/229	106/18862	4.53489e-05	0.000504989	0.000329057	FOXC1/MYC/SOX9/POU3F3/FOXC2/MEF2C/GATA3/FOXD1	8
GO:0030851	granulocyte differentiation	5/229	33/18862	4.5412e-05	0.000504989	0.000329057	SP3/LEF1/RARA/GATA2/CEBPE	5
GO:0046622	positive regulation of organ growth	6/229	54/18862	4.76112e-05	0.0005274	0.00034366	GATA6/MEF2C/HEY2/TBX20/TBX2/PROX1	6
GO:0072006	nephron development	9/229	138/18862	4.83575e-05	0.000533607	0.000347704	EGR1/FOXC1/MYC/SOX9/POU3F3/FOXC2/MEF2C/GATA3/FOXD1	9
GO:0060428	lung epithelium development	5/229	34/18862	5.27183e-05	0.000579498	0.000377607	HOXA5/CREB1/GATA6/SOX9/FOXA1	5
GO:0050678	regulation of epithelial cell proliferation	15/229	374/18862	5.58606e-05	0.000611695	0.000398587	RREB1/SP1/HOXA5/EGR3/MYC/SOX9/MEF2C/HIF1A/TBX1/GATA3/GATA2/PROX1/KLF9/TP63/DLX6	15
GO:0045619	regulation of lymphocyte differentiation	10/229	175/18862	5.70335e-05	0.000622163	0.000405409	LEF1/EGR3/SOX13/NFATC2/RARA/TBX21/FOXP3/SOX4/GATA3/IRF1	10
GO:0000083	regulation of transcription involved in G1/S transition of mitotic cell cycle	5/229	35/18862	6.09003e-05	0.000659332	0.000429628	E2F4/E2F7/E2F6/TFDP1/E2F1	5
GO:1901030	positive regulation of mitochondrial outer membrane permeabilization involved in apoptotic signaling pathway	5/229	35/18862	6.09003e-05	0.000659332	0.000429628	TP53/TFDP1/E2F1/TP73/TP63	5
GO:0001656	metanephros development	7/229	82/18862	6.22692e-05	0.000671618	0.000437634	EGR1/MYC/SOX9/POU3F3/FOXC2/GATA3/FOXD1	7
GO:0055008	cardiac muscle tissue morphogenesis	6/229	57/18862	6.48994e-05	0.000697364	0.000454411	FOXC1/FOXC2/HEY2/TBX20/FOXH1/PROX1	6
GO:0003176	aortic valve development	5/229	36/18862	7.00281e-05	0.000744113	0.000484873	SOX9/GATA5/HEY2/TBX20/GATA3	5
GO:0030224	monocyte differentiation	5/229	36/18862	7.00281e-05	0.000744113	0.000484873	SP3/MYC/JUN/FOXP1/IRF7	5
GO:2000144	positive regulation of DNA-templated transcription, initiation	5/229	36/18862	7.00281e-05	0.000744113	0.000484873	MITF/CREB1/HNF1A/TP53/JUN	5
GO:0032634	interleukin-5 production	4/229	19/18862	7.10813e-05	0.000744315	0.000485005	LEF1/RARA/FOXP3/GATA3	4
GO:0032674	regulation of interleukin-5 production	4/229	19/18862	7.10813e-05	0.000744315	0.000485005	LEF1/RARA/FOXP3/GATA3	4
GO:0046629	gamma-delta T cell activation	4/229	19/18862	7.10813e-05	0.000744315	0.000485005	LEF1/EGR3/SOX13/SOX4	4
GO:0002262	myeloid cell homeostasis	9/229	145/18862	7.10848e-05	0.000744315	0.000485005	SP3/HOXA5/PKNOX1/FOXO3/HIF1A/FOXP3/GATA3/GATA2/CEBPG	9
GO:1903749	positive regulation of establishment of protein localization to mitochondrion	6/229	58/18862	7.16606e-05	0.000747616	0.000487155	TP53/TFDP1/E2F1/SREBF2/TP73/TP63	6
GO:0014031	mesenchymal cell development	7/229	84/18862	7.2681e-05	0.000755514	0.000492301	SOX10/FOXC1/SOX9/FOXC2/HEY2/HIF1A/TBX1	7
GO:0030218	erythrocyte differentiation	8/229	115/18862	8.10176e-05	0.000839132	0.000546788	SP3/HOXA5/PKNOX1/FOXO3/HIF1A/GATA3/GATA2/CEBPG	8
GO:0000077	DNA damage checkpoint	9/229	148/18862	8.3268e-05	0.000859337	0.000559954	E2F8/E2F4/FOXO4/CLOCK/E2F7/TP53/SOX4/TFDP1/E2F1	9
GO:0030901	midbrain development	7/229	86/18862	8.44722e-05	0.000868641	0.000566016	FOXB1/PHOX2A/PITX3/LMX1A/EN2/OTX2/MSX1	7
GO:0045444	fat cell differentiation	11/229	221/18862	8.53126e-05	0.000874149	0.000569606	RREB1/TFE3/KLF5/SOX13/EGR2/CREB1/SREBF1/RORC/GATA3/GATA2/E2F1	11
GO:1901214	regulation of neuron death	13/229	302/18862	8.67883e-05	0.000886106	0.000577397	EGR1/REL/CREB1/FOXB1/TP53/MEF2C/FOXO3/HIF1A/PITX3/JUN/GATA3/MYBL2/EN2	13
GO:0003323	type B pancreatic cell development	4/229	20/18862	8.80082e-05	0.000895374	0.000583436	CLOCK/INSM1/NKX6-1/RFX3	4
GO:0071496	cellular response to external stimulus	13/229	303/18862	8.97193e-05	0.000906355	0.000590591	TFEB/USF2/USF1/NFKB1/SREBF1/SOX9/MAX/TP53/FOXO3/JUN/IRF1/SREBF2/NR1H4	13
GO:0090068	positive regulation of cell cycle process	13/229	303/18862	8.97193e-05	0.000906355	0.000590591	SOX15/E2F8/E2F4/FOXO4/E2F7/GATA6/TP53/SOX4/TFDP1/E2F1/TP73/INSM1/MSX1	13
GO:0007548	sex differentiation	12/229	262/18862	9.05613e-05	0.000911651	0.000594042	SOX15/SRY/FOXF2/FOXC1/GATA6/SOX9/HOXA10/LHX9/GATA3/TFAP2C/TP63/HESX1	12
GO:0048645	animal organ formation	6/229	61/18862	9.53748e-05	0.000956749	0.000623429	GATA6/GATA5/TBR1/MEF2C/FOXH1/TP63	6
GO:0045582	positive regulation of T cell differentiation	7/229	88/18862	9.77779e-05	0.000974044	0.000634699	LEF1/EGR3/SOX13/RARA/FOXP3/SOX4/GATA3	7
GO:0060218	hematopoietic stem cell differentiation	7/229	88/18862	9.77779e-05	0.000974044	0.000634699	FOXC1/MEOX1/TCF3/TP53/GATA3/GATA2/TP73	7
GO:0016202	regulation of striated muscle tissue development	5/229	39/18862	0.00010383	0.00103075	0.000671651	SOX15/LEF1/CREB1/MEF2C/MYF6	5
GO:0045655	regulation of monocyte differentiation	4/229	21/18862	0.000107684	0.00106533	0.000694183	MYC/JUN/FOXP1/IRF7	4
GO:0060349	bone morphogenesis	7/229	90/18862	0.000112742	0.00110593	0.000720636	FOXC1/SOX9/MEF2C/CDX1/PAX1/MEF2D/MSX1	7
GO:1902107	positive regulation of leukocyte differentiation	9/229	154/18862	0.000112944	0.00110593	0.000720636	LEF1/EGR3/SOX13/CREB1/RARA/FOXP3/JUN/SOX4/GATA3	9
GO:1903708	positive regulation of hemopoiesis	9/229	154/18862	0.000112944	0.00110593	0.000720636	LEF1/EGR3/SOX13/CREB1/RARA/FOXP3/JUN/SOX4/GATA3	9
GO:0061180	mammary gland epithelium development	6/229	63/18862	0.000114378	0.00111616	0.0007273	RREB1/HOXA5/FOXB1/HIF1A/GATA3/MSX1	6
GO:0034101	erythrocyte homeostasis	8/229	121/18862	0.000115814	0.00112587	0.00073363	SP3/HOXA5/PKNOX1/FOXO3/HIF1A/GATA3/GATA2/CEBPG	8
GO:0051146	striated muscle cell differentiation	12/229	269/18862	0.000116158	0.00112587	0.00073363	YY1/BHLHE41/KLF5/NFATC2/GATA6/MEF2C/HEY2/TBX1/MYF6/PROX1/MEF2A/MSX1	12
GO:0055023	positive regulation of cardiac muscle tissue growth	5/229	40/18862	0.000117498	0.00113502	0.000739594	GATA6/MEF2C/HEY2/TBX20/TBX2	5
GO:0031570	DNA integrity checkpoint	9/229	156/18862	0.000124618	0.00119976	0.000781777	E2F8/E2F4/FOXO4/CLOCK/E2F7/TP53/SOX4/TFDP1/E2F1	9
GO:0009755	hormone-mediated signaling pathway	10/229	193/18862	0.000128799	0.00123175	0.000802621	LEF1/CLOCK/RARA/RXRB/RXRG/NR3C1/FOXP1/FOXH1/FOXA1/TP63	10
GO:0060348	bone development	10/229	193/18862	0.000128799	0.00123175	0.000802621	MEIS1/FOXC1/SOX9/TP53/MEF2C/CDX1/FOXP1/PAX1/MEF2D/MSX1	10
GO:0051151	negative regulation of smooth muscle cell differentiation	4/229	22/18862	0.000130366	0.00124259	0.000809685	FOXO4/NFATC2/HEY2/NFATC3	4
GO:1901861	regulation of muscle tissue development	5/229	41/18862	0.000132504	0.00125879	0.000820242	SOX15/LEF1/CREB1/MEF2C/MYF6	5
GO:0048709	oligodendrocyte differentiation	7/229	93/18862	0.00013863	0.00130832	0.000852519	SOX13/SOX10/SOX9/NKX6-2/OLIG2/TP73/NKX6-1	7
GO:0051153	regulation of striated muscle cell differentiation	7/229	93/18862	0.00013863	0.00130832	0.000852519	YY1/BHLHE41/MEF2C/TBX1/MYF6/PROX1/MSX1	7
GO:0050890	cognition	12/229	276/18862	0.000147736	0.00138968	0.000905534	FOXO6/EGR2/CREB1/FOXB1/TBR1/MEF2C/HIF1A/NEUROD2/JUN/CUX2/LMX1A/MEIS2	12
GO:0043523	regulation of neuron apoptotic process	10/229	197/18862	0.000152362	0.00142851	0.000930836	FOXB1/TP53/MEF2C/FOXO3/HIF1A/PITX3/JUN/GATA3/MYBL2/EN2	10
GO:0032922	circadian regulation of gene expression	6/229	67/18862	0.000161354	0.0015079	0.000982567	BHLHE41/BHLHE40/EGR1/CLOCK/RORC/ID4	6
GO:0048634	regulation of muscle organ development	5/229	43/18862	0.000166879	0.00155446	0.00101291	SOX15/LEF1/CREB1/MEF2C/MYF6	5
GO:0001707	mesoderm formation	6/229	68/18862	0.000175195	0.00161619	0.00105313	LEF1/FOXC1/EOMES/FOXC2/TBX20/TBX19	6
GO:0008306	associative learning	6/229	68/18862	0.000175195	0.00161619	0.00105313	CREB1/FOXB1/TBR1/HIF1A/NEUROD2/MEIS2	6
GO:0045685	regulation of glial cell differentiation	6/229	68/18862	0.000175195	0.00161619	0.00105313	EGR2/RELA/NKX6-2/OLIG2/TP73/NKX6-1	6
GO:0048596	embryonic camera-type eye morphogenesis	4/229	24/18862	0.0001858	0.00170338	0.00110994	SP3/FOXF2/TBX2/PROX1	4
GO:0055010	ventricular cardiac muscle tissue morphogenesis	5/229	44/18862	0.000186427	0.00170338	0.00110994	FOXC1/FOXC2/HEY2/FOXH1/PROX1	5
GO:1901028	regulation of mitochondrial outer membrane permeabilization involved in apoptotic signaling pathway	5/229	44/18862	0.000186427	0.00170338	0.00110994	TP53/TFDP1/E2F1/TP73/TP63	5
GO:0046890	regulation of lipid biosynthetic process	10/229	203/18862	0.000194462	0.00177115	0.0011541	SP1/MLXIPL/EGR1/CREB1/NFKB1/SREBF1/SREBF2/NFYB/PROX1/NR1H4	10
GO:0048340	paraxial mesoderm morphogenesis	3/229	10/18862	0.000199014	0.00180117	0.00117366	LEF1/FOXC1/FOXC2	3
GO:0048703	embryonic viscerocranium morphogenesis	3/229	10/18862	0.000199014	0.00180117	0.00117366	FOXC2/TBX1/HOXA2	3
GO:0042770	signal transduction in response to DNA damage	8/229	131/18862	0.000200764	0.00180562	0.00117656	E2F8/E2F4/E2F7/TP53/SOX4/TFDP1/E2F1/MSX1	8
GO:0072073	kidney epithelium development	8/229	131/18862	0.000200764	0.00180562	0.00117656	FOXC1/MYC/SOX9/POU3F3/FOXC2/MEF2C/GATA3/FOXD1	8
GO:0048332	mesoderm morphogenesis	6/229	70/18862	0.000205684	0.00184408	0.00120163	LEF1/FOXC1/EOMES/FOXC2/TBX20/TBX19	6
GO:0002068	glandular epithelial cell development	4/229	25/18862	0.000219094	0.00194607	0.00126808	CLOCK/INSM1/NKX6-1/RFX3	4
GO:0003148	outflow tract septum morphogenesis	4/229	25/18862	0.000219094	0.00194607	0.00126808	GATA6/TBX20/TBX2/TBX1	4
GO:0003171	atrioventricular valve development	4/229	25/18862	0.000219094	0.00194607	0.00126808	HEY1/HEY2/TBX20/SOX4	4
GO:0045621	positive regulation of lymphocyte differentiation	7/229	101/18862	0.000231907	0.00205352	0.0013381	LEF1/EGR3/SOX13/RARA/FOXP3/SOX4/GATA3	7
GO:0008584	male gonad development	8/229	134/18862	0.000234444	0.0020696	0.00134858	SOX15/SRY/GATA6/SOX9/HOXA10/LHX9/GATA3/TFAP2C	8
GO:0048639	positive regulation of developmental growth	9/229	170/18862	0.000238015	0.00209468	0.00136492	SOX15/CREB1/GATA6/POU3F2/MEF2C/HEY2/TBX20/TBX2/PROX1	9
GO:0000075	cell cycle checkpoint	10/229	209/18862	0.000245943	0.00215087	0.00140153	E2F8/E2F4/FOXO4/CLOCK/E2F7/TP53/SOX4/TFDP1/E2F1/PROX1	10
GO:0045639	positive regulation of myeloid cell differentiation	7/229	102/18862	0.000246462	0.00215087	0.00140153	HOXA5/LEF1/CREB1/FOXO3/HIF1A/JUN/GATA2	7
GO:0046546	development of primary male sexual characteristics	8/229	135/18862	0.000246649	0.00215087	0.00140153	SOX15/SRY/GATA6/SOX9/HOXA10/LHX9/GATA3/TFAP2C	8
GO:0031669	cellular response to nutrient levels	10/229	210/18862	0.000255544	0.00222168	0.00144768	TFEB/USF2/USF1/SREBF1/MAX/TP53/FOXO3/JUN/SREBF2/NR1H4	10
GO:0001945	lymph vessel development	4/229	26/18862	0.000256477	0.00222306	0.00144857	FOXC1/FOXC2/TBX1/PROX1	4
GO:0008406	gonad development	10/229	212/18862	0.000275691	0.0023824	0.0015524	SOX15/SRY/FOXC1/GATA6/SOX9/HOXA10/LHX9/GATA3/TFAP2C/HESX1	10
GO:0014009	glial cell proliferation	5/229	48/18862	0.000282588	0.00242738	0.00158171	CREB1/SOX10/PLAG1/SOX4/E2F1	5
GO:0051204	protein insertion into mitochondrial membrane	5/229	48/18862	0.000282588	0.00242738	0.00158171	TP53/TFDP1/E2F1/TP73/TP63	5
GO:0010634	positive regulation of epithelial cell migration	9/229	175/18862	0.000295111	0.00252738	0.00164687	RREB1/SP1/SOX9/FOXC2/HIF1A/GATA3/GATA2/FOXP1/PROX1	9
GO:0035116	embryonic hindlimb morphogenesis	4/229	27/18862	0.000298231	0.00253895	0.00165441	TBX4/ALX3/TP63/MSX1	4
GO:0048665	neuron fate specification	4/229	27/18862	0.000298231	0.00253895	0.00165441	POU3F2/MNX1/HOXC10/FOXA1	4
GO:0072332	intrinsic apoptotic signaling pathway by p53 class mediator	6/229	75/18862	0.000300372	0.00254961	0.00166136	E2F2/TP53/E2F1/TP73/TP63/MSX1	6
GO:0045137	development of primary sexual characteristics	10/229	217/18862	0.000331948	0.00280931	0.00183058	SOX15/SRY/FOXC1/GATA6/SOX9/HOXA10/LHX9/GATA3/TFAP2C/HESX1	10
GO:0046879	hormone secretion	12/229	302/18862	0.000337477	0.00284771	0.0018556	CREB1/CLOCK/SREBF1/HNF1A/HIF1A/SOX4/GATA3/FOXD1/PDX1/NKX6-1/NR1H4/RFX3	12
GO:0003229	ventricular cardiac muscle tissue development	5/229	50/18862	0.000342854	0.0028846	0.00187964	FOXC1/FOXC2/HEY2/FOXH1/PROX1	5
GO:0032703	negative regulation of interleukin-2 production	4/229	28/18862	0.000344644	0.00289118	0.00188392	TBX21/FOXP3/GATA3/NR1H4	4
GO:0032352	positive regulation of hormone metabolic process	3/229	12/18862	0.000358357	0.00298874	0.0019475	EGR1/HIF1A/GATA3	3
GO:0060707	trophoblast giant cell differentiation	3/229	12/18862	0.000358357	0.00298874	0.0019475	SOX15/E2F8/E2F7	3
GO:0048754	branching morphogenesis of an epithelial tube	8/229	143/18862	0.000364268	0.00302923	0.00197388	HOXA5/LEF1/MYC/SOX9/FOXC2/TBX20/FOXD1/FOXA1	8
GO:2000677	regulation of transcription regulatory region DNA binding	5/229	51/18862	0.000376401	0.00312108	0.00203373	FOXC1/HEY1/HEY2/GATA3/MSX1	5
GO:0072331	signal transduction by p53 class mediator	11/229	263/18862	0.00038681	0.00319815	0.00208395	E2F8/E2F2/E2F4/E2F7/TP53/SOX4/TFDP1/E2F1/TP73/TP63/MSX1	11
GO:0003209	cardiac atrium morphogenesis	4/229	29/18862	0.000396004	0.0032554	0.00212126	HEY2/TBX20/SOX4/PROX1	4
GO:0060325	face morphogenesis	4/229	29/18862	0.000396004	0.0032554	0.00212126	LEF1/TBX1/PAX9/MSX1	4
GO:0019827	stem cell population maintenance	8/229	146/18862	0.000418707	0.0034322	0.00223646	ZIC3/MYC/SOX9/SOX4/GATA2/FOXP1/PROX1/TP63	8
GO:0014032	neural crest cell development	6/229	80/18862	0.000426283	0.00348435	0.00227044	SOX10/FOXC1/SOX9/FOXC2/HIF1A/TBX1	6
GO:0031667	response to nutrient levels	15/229	451/18862	0.000427557	0.00348483	0.00227076	TFEB/USF2/USF1/FOXK2/FOXO4/SREBF1/MAX/TP53/RELA/FOXO3/JUN/SREBF2/PROX1/PDX1/NR1H4	15
GO:2000736	regulation of stem cell differentiation	7/229	112/18862	0.00043655	0.00354805	0.00231195	FOXC1/GATA6/SOX9/TCF3/GATA3/GATA2/TP73	7
GO:0021885	forebrain cell migration	5/229	53/18862	0.000450872	0.00361707	0.00235693	FOXB1/FOXG1/POU3F2/EMX2/POU3F3	5
GO:0090151	establishment of protein localization to mitochondrial membrane	5/229	53/18862	0.000450872	0.00361707	0.00235693	TP53/TFDP1/E2F1/TP73/TP63	5
GO:0009914	hormone transport	12/229	312/18862	0.000452042	0.00361707	0.00235693	CREB1/CLOCK/SREBF1/HNF1A/HIF1A/SOX4/GATA3/FOXD1/PDX1/NKX6-1/NR1H4/RFX3	12
GO:0051222	positive regulation of protein transport	12/229	312/18862	0.000452042	0.00361707	0.00235693	ZIC1/TP53/HIF1A/SOX4/TFDP1/E2F1/SREBF2/TP73/PDX1/NKX6-1/TP63/NR1H4	12
GO:0070168	negative regulation of biomineral tissue development	4/229	30/18862	0.000452607	0.00361707	0.00235693	SOX9/HEY1/HEY2/HIF1A	4
GO:0090183	regulation of kidney development	4/229	30/18862	0.000452607	0.00361707	0.00235693	MYC/SOX9/GATA3/FOXD1	4
GO:0098727	maintenance of cell number	8/229	148/18862	0.000458542	0.00365433	0.0023812	ZIC3/MYC/SOX9/SOX4/GATA2/FOXP1/PROX1/TP63	8
GO:0060576	intestinal epithelial cell development	3/229	13/18862	0.000461699	0.00365915	0.00238435	HOXA5/KLF5/HIF1A	3
GO:1905064	negative regulation of vascular associated smooth muscle cell differentiation	3/229	13/18862	0.000461699	0.00365915	0.00238435	NFATC2/HEY2/NFATC3	3
GO:0010948	negative regulation of cell cycle process	13/229	359/18862	0.000467549	0.00369531	0.00240791	MLXIPL/E2F8/E2F4/FOXO4/E2F7/E2F6/MAX/MGA/TP53/SOX4/TFDP1/E2F1/DUX4	13
GO:0043525	positive regulation of neuron apoptotic process	5/229	54/18862	0.000492021	0.00387804	0.00252698	TP53/FOXO3/PITX3/JUN/MYBL2	5
GO:0001704	formation of primary germ layer	7/229	115/18862	0.000512043	0.00400219	0.00260788	LEF1/FOXC1/GATA6/EOMES/FOXC2/TBX20/TBX19	7
GO:0110150	negative regulation of biomineralization	4/229	31/18862	0.000514747	0.00400219	0.00260788	SOX9/HEY1/HEY2/HIF1A	4
GO:1902692	regulation of neuroblast proliferation	4/229	31/18862	0.000514747	0.00400219	0.00260788	SOX10/FOXG1/TP53/HIF1A	4
GO:1903146	regulation of autophagy of mitochondrion	4/229	31/18862	0.000514747	0.00400219	0.00260788	SREBF1/TP53/HIF1A/SREBF2	4
GO:1904837	beta-catenin-TCF complex assembly	4/229	31/18862	0.000514747	0.00400219	0.00260788	LEF1/MYC/SOX9/TCF7L1	4
GO:0002285	lymphocyte activation involved in immune response	9/229	189/18862	0.000517967	0.00401635	0.0026171	LEF1/RARA/TP53/RORC/EOMES/TBX21/FOXP3/GATA3/FOXP1	9
GO:0048864	stem cell development	6/229	83/18862	0.00051954	0.00401769	0.00261797	SOX10/FOXC1/SOX9/FOXC2/HIF1A/TBX1	6
GO:0010821	regulation of mitochondrion organization	8/229	151/18862	0.000524015	0.00403714	0.00263065	SREBF1/TP53/HIF1A/TFDP1/E2F1/SREBF2/TP73/TP63	8
GO:0007409	axonogenesis	15/229	460/18862	0.00052487	0.00403714	0.00263065	EGR2/CREB1/FOXB1/FOXG1/POU3F2/TBR1/LHX9/GATA3/GBX1/FOXD1/LMX1A/POU4F3/HOXA2/OTX2/NKX6-1	15
GO:0007405	neuroblast proliferation	5/229	55/18862	0.000535932	0.00410024	0.00267176	LEF1/SOX10/FOXG1/TP53/HIF1A	5
GO:0097345	mitochondrial outer membrane permeabilization	5/229	55/18862	0.000535932	0.00410024	0.00267176	TP53/TFDP1/E2F1/TP73/TP63	5
GO:0030111	regulation of Wnt signaling pathway	13/229	365/18862	0.000546187	0.00416758	0.00271564	LEF1/EGR1/FOXL1/SOX13/SOX10/NFKB1/SOX9/LBX2/FOXP3/SOX4/GSC/TCF7L1/BARX1	13
GO:0010822	positive regulation of mitochondrion organization	6/229	84/18862	0.000553914	0.00421533	0.00274676	TP53/HIF1A/TFDP1/E2F1/TP73/TP63	6
GO:0000082	G1/S transition of mitotic cell cycle	11/229	275/18862	0.000562095	0.00426627	0.00277995	E2F8/E2F4/E2F3/E2F7/MYC/E2F6/MAX/TP53/SOX4/TFDP1/E2F1	11
GO:0046661	male sex differentiation	8/229	153/18862	0.000571725	0.00430885	0.0028077	SOX15/SRY/GATA6/SOX9/HOXA10/LHX9/GATA3/TFAP2C	8
GO:0021783	preganglionic parasympathetic fiber development	3/229	14/18862	0.000582365	0.00430885	0.0028077	EGR2/PHOX2A/TBX1	3
GO:0043374	CD8-positive, alpha-beta T cell differentiation	3/229	14/18862	0.000582365	0.00430885	0.0028077	EOMES/IRF1/PAX1	3
GO:0060644	mammary gland epithelial cell differentiation	3/229	14/18862	0.000582365	0.00430885	0.0028077	HOXA5/FOXB1/HIF1A	3
GO:1901722	regulation of cell proliferation involved in kidney development	3/229	14/18862	0.000582365	0.00430885	0.0028077	EGR1/MYC/GATA3	3
GO:0009954	proximal/distal pattern formation	4/229	32/18862	0.000582723	0.00430885	0.0028077	SP8/HOXA10/HOXC10/TP63	4
GO:0032673	regulation of interleukin-4 production	4/229	32/18862	0.000582723	0.00430885	0.0028077	LEF1/RARA/FOXP3/GATA3	4
GO:0048048	embryonic eye morphogenesis	4/229	32/18862	0.000582723	0.00430885	0.0028077	SP3/FOXF2/TBX2/PROX1	4
GO:0048384	retinoic acid receptor signaling pathway	4/229	32/18862	0.000582723	0.00430885	0.0028077	RARA/RXRB/RXRG/TBX1	4
GO:0021872	forebrain generation of neurons	5/229	56/18862	0.000582724	0.00430885	0.0028077	LEF1/FOXG1/TBR1/GATA2/PROX1	5
GO:0007411	axon guidance	11/229	277/18862	0.000596932	0.0043961	0.00286455	EGR2/FOXG1/TBR1/LHX9/GATA3/GBX1/FOXD1/LMX1A/POU4F3/HOXA2/OTX2	11
GO:0042752	regulation of circadian rhythm	7/229	118/18862	0.000597587	0.0043961	0.00286455	BHLHE40/CREB1/CLOCK/TP53/RORC/PROX1/RORB	7
GO:0097485	neuron projection guidance	11/229	278/18862	0.000615015	0.00451273	0.00294055	EGR2/FOXG1/TBR1/LHX9/GATA3/GBX1/FOXD1/LMX1A/POU4F3/HOXA2/OTX2	11
GO:0031668	cellular response to extracellular stimulus	10/229	235/18862	0.000619893	0.00453692	0.00295631	TFEB/USF2/USF1/SREBF1/MAX/TP53/FOXO3/JUN/SREBF2/NR1H4	10
GO:0001657	ureteric bud development	6/229	86/18862	0.000627946	0.00456494	0.00297457	FOXC1/MYC/SOX9/FOXC2/GATA3/FOXD1	6
GO:0060021	roof of mouth development	6/229	86/18862	0.000627946	0.00456494	0.00297457	LEF1/FOXF2/TBX2/TBX1/MSX1/DLX6	6
GO:2000134	negative regulation of G1/S transition of mitotic cell cycle	7/229	119/18862	0.000628495	0.00456494	0.00297457	E2F8/E2F4/E2F7/TP53/SOX4/TFDP1/E2F1	7
GO:0030856	regulation of epithelial cell differentiation	8/229	156/18862	0.000649821	0.0046994	0.00306218	MAFG/FOXC1/SOX9/HEY2/GATA3/NKX6-1/TP63/RFX3	8
GO:0031076	embryonic camera-type eye development	4/229	33/18862	0.000656835	0.0046994	0.00306218	SP3/FOXF2/TBX2/PROX1	4
GO:0032350	regulation of hormone metabolic process	4/229	33/18862	0.000656835	0.0046994	0.00306218	EGR1/NFKB1/HIF1A/GATA3	4
GO:0032633	interleukin-4 production	4/229	33/18862	0.000656835	0.0046994	0.00306218	LEF1/RARA/FOXP3/GATA3	4
GO:0060251	regulation of glial cell proliferation	4/229	33/18862	0.000656835	0.0046994	0.00306218	CREB1/SOX10/PLAG1/E2F1	4
GO:0060323	head morphogenesis	4/229	33/18862	0.000656835	0.0046994	0.00306218	LEF1/TBX1/PAX9/MSX1	4
GO:0072163	mesonephric epithelium development	6/229	87/18862	0.000667726	0.00475361	0.00309751	FOXC1/MYC/SOX9/FOXC2/GATA3/FOXD1	6
GO:0072164	mesonephric tubule development	6/229	87/18862	0.000667726	0.00475361	0.00309751	FOXC1/MYC/SOX9/FOXC2/GATA3/FOXD1	6
GO:0061005	cell differentiation involved in kidney development	5/229	58/18862	0.000685426	0.00486754	0.00317175	GLIS2/POU3F3/FOXC2/MEF2C/GATA3	5
GO:1904951	positive regulation of establishment of protein localization	12/229	328/18862	0.000702947	0.00497964	0.00324479	ZIC1/TP53/HIF1A/SOX4/TFDP1/E2F1/SREBF2/TP73/PDX1/NKX6-1/TP63/NR1H4	12
GO:0072080	nephron tubule development	6/229	88/18862	0.000709429	0.00501318	0.00326665	MYC/SOX9/POU3F3/MEF2C/GATA3/FOXD1	6
GO:0048484	enteric nervous system development	3/229	15/18862	0.000721455	0.00507317	0.00330574	SOX10/PHOX2A/ISX	3
GO:0060413	atrial septum morphogenesis	3/229	15/18862	0.000721455	0.00507317	0.00330574	HEY2/TBX20/SOX4	3
GO:0007093	mitotic cell cycle checkpoint	8/229	159/18862	0.00073631	0.00514734	0.00335406	E2F8/E2F4/FOXO4/E2F7/TP53/SOX4/TFDP1/E2F1	8
GO:0010092	specification of animal organ identity	4/229	34/18862	0.000737384	0.00514734	0.00335406	GATA5/TBR1/MEF2C/FOXH1	4
GO:0035137	hindlimb morphogenesis	4/229	34/18862	0.000737384	0.00514734	0.00335406	TBX4/ALX3/TP63/MSX1	4
GO:0051149	positive regulation of muscle cell differentiation	6/229	89/18862	0.00075312	0.00524442	0.00341732	TCF3/MEF2C/TBX1/MYF6/PROX1/MEF2A	6
GO:0009991	response to extracellular stimulus	15/229	477/18862	0.000760965	0.00528622	0.00344456	TFEB/USF2/USF1/FOXK2/FOXO4/SREBF1/MAX/TP53/RELA/FOXO3/JUN/SREBF2/PROX1/PDX1/NR1H4	15
GO:0061326	renal tubule development	6/229	90/18862	0.000798861	0.00550876	0.00358957	MYC/SOX9/POU3F3/MEF2C/GATA3/FOXD1	6
GO:0002244	hematopoietic progenitor cell differentiation	8/229	161/18862	0.000798949	0.00550876	0.00358957	FOXC1/MEOX1/TCF3/TP53/SOX4/GATA3/GATA2/TP73	8
GO:1902110	positive regulation of mitochondrial membrane permeability involved in apoptotic process	5/229	60/18862	0.000801098	0.00550876	0.00358957	TP53/TFDP1/E2F1/TP73/TP63	5
GO:0042552	myelination	7/229	124/18862	0.000802601	0.00550876	0.00358957	ZNF24/EGR2/SOX10/POU3F2/POU3F1/NKX6-2/OLIG2	7
GO:1902807	negative regulation of cell cycle G1/S phase transition	7/229	124/18862	0.000802601	0.00550876	0.00358957	E2F8/E2F4/E2F7/TP53/SOX4/TFDP1/E2F1	7
GO:0003230	cardiac atrium development	4/229	35/18862	0.000824672	0.00561992	0.003662	HEY2/TBX20/SOX4/PROX1	4
GO:0033144	negative regulation of intracellular steroid hormone receptor signaling pathway	4/229	35/18862	0.000824672	0.00561992	0.003662	CLOCK/FOXP1/FOXH1/TP63	4
GO:0060260	regulation of transcription initiation from RNA polymerase II promoter	4/229	35/18862	0.000824672	0.00561992	0.003662	CREB1/HNF1A/TP53/HEY2	4
GO:0001823	mesonephros development	6/229	91/18862	0.000846718	0.00575648	0.00375099	FOXC1/MYC/SOX9/FOXC2/GATA3/FOXD1	6
GO:0090181	regulation of cholesterol metabolic process	5/229	61/18862	0.000864109	0.005847	0.00380998	SP1/SREBF1/SREBF2/NFYB/NR1H4	5
GO:1905330	regulation of morphogenesis of an epithelium	5/229	61/18862	0.000864109	0.005847	0.00380998	SOX9/LBX2/TBX2/GATA3/FOXP1	5
GO:0033151	V(D)J recombination	3/229	16/18862	0.000880018	0.00587162	0.00382601	YY1/LEF1/TCF3	3
GO:0043923	positive regulation by host of viral transcription	3/229	16/18862	0.000880018	0.00587162	0.00382601	SP1/LEF1/JUN	3
GO:0048486	parasympathetic nervous system development	3/229	16/18862	0.000880018	0.00587162	0.00382601	EGR2/PHOX2A/TBX1	3
GO:0070365	hepatocyte differentiation	3/229	16/18862	0.000880018	0.00587162	0.00382601	E2F8/E2F7/PROX1	3
GO:0090336	positive regulation of brown fat cell differentiation	3/229	16/18862	0.000880018	0.00587162	0.00382601	RREB1/TFE3/SOX13	3
GO:0007272	ensheathment of neurons	7/229	126/18862	0.000882073	0.00587162	0.00382601	ZNF24/EGR2/SOX10/POU3F2/POU3F1/NKX6-2/OLIG2	7
GO:0008366	axon ensheathment	7/229	126/18862	0.000882073	0.00587162	0.00382601	ZNF24/EGR2/SOX10/POU3F2/POU3F1/NKX6-2/OLIG2	7
GO:0045638	negative regulation of myeloid cell differentiation	6/229	92/18862	0.000896755	0.00594178	0.00387173	HOXA5/MEIS1/MYC/RARA/GATA2/MEIS2	6
GO:1901216	positive regulation of neuron death	6/229	92/18862	0.000896755	0.00594178	0.00387173	EGR1/TP53/FOXO3/PITX3/JUN/MYBL2	6
GO:0014014	negative regulation of gliogenesis	4/229	36/18862	0.000919003	0.00606119	0.00394954	SOX10/PITX3/NKX6-2/NKX6-1	4
GO:0014037	Schwann cell differentiation	4/229	36/18862	0.000919003	0.00606119	0.00394954	EGR2/POU3F2/RELA/POU3F1	4
GO:1902686	mitochondrial outer membrane permeabilization involved in programmed cell death	5/229	62/18862	0.000930739	0.00612452	0.00399081	TP53/TFDP1/E2F1/TP73/TP63	5
GO:0001819	positive regulation of cytokine production	14/229	437/18862	0.000950787	0.00622787	0.00405815	NFKB2/EGR1/CREB1/NFKB1/RARA/GATA6/RELA/HIF1A/FOXP3/GATA3/POU2F2/CEBPG/IRF1/IRF7	14
GO:0062012	regulation of small molecule metabolic process	14/229	437/18862	0.000950787	0.00622787	0.00405815	SP1/MLXIPL/EGR1/FOXK2/NFKB1/SREBF1/SOX9/TP53/RORC/HIF1A/SREBF2/NFYB/PROX1/NR1H4	14
GO:0032479	regulation of type I interferon production	7/229	128/18862	0.000967625	0.00632373	0.00412062	YY1/NFKB2/REL/NFKB1/RELA/IRF1/IRF7	7
GO:0048469	cell maturation	8/229	166/18862	0.000974437	0.00635377	0.00414019	HOXA5/SOX10/HIF1A/GATA3/GATA2/FOXA1/NKX6-1/RFX3	8
GO:0030073	insulin secretion	9/229	207/18862	0.000990825	0.00644598	0.00420027	CLOCK/SREBF1/HNF1A/HIF1A/SOX4/PDX1/NKX6-1/NR1H4/RFX3	9
GO:0032606	type I interferon production	7/229	129/18862	0.00101278	0.00654558	0.00426518	YY1/NFKB2/REL/NFKB1/RELA/IRF1/IRF7	7
GO:0071772	response to BMP	8/229	167/18862	0.00101298	0.00654558	0.00426518	LEF1/EGR1/GATA6/SOX9/GATA5/GATA3/FOXD1/MSX1	8
GO:0071773	cellular response to BMP stimulus	8/229	167/18862	0.00101298	0.00654558	0.00426518	LEF1/EGR1/GATA6/SOX9/GATA5/GATA3/FOXD1/MSX1	8
GO:0035886	vascular associated smooth muscle cell differentiation	4/229	37/18862	0.00102068	0.00656576	0.00427832	NFATC2/GATA6/HEY2/NFATC3	4
GO:0060412	ventricular septum morphogenesis	4/229	37/18862	0.00102068	0.00656576	0.00427832	HEY1/HEY2/SOX4/PROX1	4
GO:1901653	cellular response to peptide	13/229	391/18862	0.00102897	0.00660431	0.00430344	SP1/USF1/KLF5/FOXO4/CREB1/NFKB1/SREBF1/MAX/TP53/RELA/FOXC2/NKX6-1/NR1H4	13
GO:0001946	lymphangiogenesis	3/229	17/18862	0.00105906	0.00665194	0.00433448	FOXC1/FOXC2/PROX1	3
GO:0003184	pulmonary valve morphogenesis	3/229	17/18862	0.00105906	0.00665194	0.00433448	HEY1/HEY2/TBX20	3
GO:0033599	regulation of mammary gland epithelial cell proliferation	3/229	17/18862	0.00105906	0.00665194	0.00433448	RREB1/HOXA5/GATA3	3
GO:0048339	paraxial mesoderm development	3/229	17/18862	0.00105906	0.00665194	0.00433448	LEF1/FOXC1/FOXC2	3
GO:0051782	negative regulation of cell division	3/229	17/18862	0.00105906	0.00665194	0.00433448	E2F8/E2F7/MYC	3
GO:0060438	trachea development	3/229	17/18862	0.00105906	0.00665194	0.00433448	HOXA5/LEF1/SOX9	3
GO:0060749	mammary gland alveolus development	3/229	17/18862	0.00105906	0.00665194	0.00433448	HOXA5/FOXB1/HIF1A	3
GO:0061377	mammary gland lobule development	3/229	17/18862	0.00105906	0.00665194	0.00433448	HOXA5/FOXB1/HIF1A	3
GO:0007612	learning	7/229	130/18862	0.00105958	0.00665194	0.00433448	CREB1/FOXB1/TBR1/HIF1A/NEUROD2/JUN/MEIS2	7
GO:0035264	multicellular organism growth	7/229	130/18862	0.00105958	0.00665194	0.00433448	SP2/HOXA5/CREB1/POU3F2/TP53/PLAG1/HESX1	7
GO:0002562	somatic diversification of immune receptors via germline recombination within a single locus	5/229	64/18862	0.00107537	0.00667798	0.00435145	YY1/LEF1/TCF3/TBX21/FOXP3	5
GO:0003281	ventricular septum development	5/229	64/18862	0.00107537	0.00667798	0.00435145	HEY1/HEY2/SOX4/GATA3/PROX1	5
GO:0016444	somatic cell DNA recombination	5/229	64/18862	0.00107537	0.00667798	0.00435145	YY1/LEF1/TCF3/TBX21/FOXP3	5
GO:0035794	positive regulation of mitochondrial membrane permeability	5/229	64/18862	0.00107537	0.00667798	0.00435145	TP53/TFDP1/E2F1/TP73/TP63	5
GO:0071300	cellular response to retinoic acid	5/229	64/18862	0.00107537	0.00667798	0.00435145	CREB1/SOX9/TBX1/HOXA2/RORB	5
GO:0044843	cell cycle G1/S phase transition	11/229	298/18862	0.00108467	0.00672119	0.00437961	E2F8/E2F4/E2F3/E2F7/MYC/E2F6/MAX/TP53/SOX4/TFDP1/E2F1	11
GO:0010463	mesenchymal cell proliferation	4/229	38/18862	0.00113	0.00695704	0.00453329	MYC/SOX9/TBX1/MSX1	4
GO:0048286	lung alveolus development	4/229	38/18862	0.00113	0.00695704	0.00453329	HOXA5/CREB1/GATA6/FOXA1	4
GO:0071398	cellular response to fatty acid	4/229	38/18862	0.00113	0.00695704	0.00453329	CREB1/SREBF1/E2F1/NR1H4	4
GO:0009880	embryonic pattern specification	5/229	65/18862	0.00115362	0.00708726	0.00461814	MEIS1/MEOX1/MEIS2/MEIS3/NOTO	5
GO:0010595	positive regulation of endothelial cell migration	7/229	132/18862	0.00115827	0.00710059	0.00462682	SP1/FOXC2/HIF1A/GATA3/GATA2/FOXP1/PROX1	7
GO:0009314	response to radiation	14/229	447/18862	0.00117913	0.00721305	0.00470011	YY1/BHLHE40/USF1/EGR1/CREB1/CLOCK/MYC/FOXB1/TP53/RELA/HIF1A/JUN/GATA3/MEIS2	14
GO:0045600	positive regulation of fat cell differentiation	5/229	66/18862	0.00123602	0.00752897	0.00490596	RREB1/TFE3/KLF5/SOX13/CREB1	5
GO:1902108	regulation of mitochondrial membrane permeability involved in apoptotic process	5/229	66/18862	0.00123602	0.00752897	0.00490596	TP53/TFDP1/E2F1/TP73/TP63	5
GO:0003128	heart field specification	3/229	18/18862	0.00125954	0.00760763	0.00495722	GATA5/MEF2C/FOXH1	3
GO:0032656	regulation of interleukin-13 production	3/229	18/18862	0.00125954	0.00760763	0.00495722	LEF1/RARA/GATA3	3
GO:0072189	ureter development	3/229	18/18862	0.00125954	0.00760763	0.00495722	SOX9/EMX2/GATA3	3
GO:2000738	positive regulation of stem cell differentiation	3/229	18/18862	0.00125954	0.00760763	0.00495722	FOXC1/GATA6/SOX9	3
GO:0071634	regulation of transforming growth factor beta production	4/229	40/18862	0.00137281	0.00827437	0.00539167	CREB1/GATA6/HIF1A/FOXP3	4
GO:0022037	metencephalon development	6/229	101/18862	0.00145643	0.00874164	0.00569615	FOXC1/TP53/NEUROD2/PHOX2A/LMX1A/PROX1	6
GO:1902106	negative regulation of leukocyte differentiation	6/229	101/18862	0.00145643	0.00874164	0.00569615	MYC/RARA/TBX21/FOXP3/GATA2/IRF1	6
GO:0043433	negative regulation of DNA-binding transcription factor activity	8/229	177/18862	0.00146961	0.00880234	0.0057357	BHLHE40/GLIS2/EOMES/FOXP3/CEBPG/FOXH1/PROX1/NR1H4	8
GO:0002089	lens morphogenesis in camera-type eye	3/229	19/18862	0.00148238	0.00884188	0.00576147	MEIS1/PITX3/PROX1	3
GO:0060216	definitive hemopoiesis	3/229	19/18862	0.00148238	0.00884188	0.00576147	SP3/MEIS1/GATA2	3
GO:0007178	transmembrane receptor protein serine/threonine kinase signaling pathway	12/229	358/18862	0.00148914	0.00886376	0.00577573	LEF1/EGR1/TGIF2/ONECUT2/CREB1/ONECUT1/TP53/TBX20/JUN/FOXH1/FOXD1/MSX1	12
GO:0030850	prostate gland development	4/229	41/18862	0.0015069	0.00891024	0.00580601	SOX9/PLAG1/FOXA1/TP63	4
GO:0032689	negative regulation of interferon-gamma production	4/229	41/18862	0.0015069	0.00891024	0.00580601	RARA/FOXP3/GATA3/NR1H4	4
GO:0035272	exocrine system development	4/229	41/18862	0.0015069	0.00891024	0.00580601	SOX10/FOXC1/SOX9/PDX1	4
GO:1905710	positive regulation of membrane permeability	5/229	69/18862	0.00150937	0.00891024	0.00580601	TP53/TFDP1/E2F1/TP73/TP63	5
GO:0050796	regulation of insulin secretion	8/229	178/18862	0.00152303	0.00897243	0.00584654	CLOCK/SREBF1/HIF1A/SOX4/PDX1/NKX6-1/NR1H4/RFX3	8
GO:0051091	positive regulation of DNA-binding transcription factor activity	10/229	266/18862	0.00158339	0.00930893	0.00606581	NFKB2/CLOCK/NFKB1/TCF3/RELA/NEUROD2/TFDP1/CEBPG/FOXA1/NKX6-1	10
GO:0008542	visual learning	4/229	42/18862	0.00164984	0.00966	0.00629457	CREB1/FOXB1/HIF1A/MEIS2	4
GO:0071604	transforming growth factor beta production	4/229	42/18862	0.00164984	0.00966	0.00629457	CREB1/GATA6/HIF1A/FOXP3	4
GO:0031056	regulation of histone modification	7/229	141/18862	0.00169491	0.00990365	0.00645334	SREBF1/TP53/FOXP3/GATA3/GATA2/CTCFL/PAX5	7
GO:0032024	positive regulation of insulin secretion	5/229	71/18862	0.00171474	0.00993768	0.00647551	HIF1A/SOX4/PDX1/NKX6-1/NR1H4	5
GO:0061333	renal tubule morphogenesis	5/229	71/18862	0.00171474	0.00993768	0.00647551	MYC/SOX9/MEF2C/GATA3/FOXD1	5
GO:0021854	hypothalamus development	3/229	20/18862	0.00172844	0.00993768	0.00647551	FOXB1/POU3F2/GSX1	3
GO:0032616	interleukin-13 production	3/229	20/18862	0.00172844	0.00993768	0.00647551	LEF1/RARA/GATA3	3
GO:0046885	regulation of hormone biosynthetic process	3/229	20/18862	0.00172844	0.00993768	0.00647551	EGR1/NFKB1/HIF1A	3
GO:0060563	neuroepithelial cell differentiation	3/229	20/18862	0.00172844	0.00993768	0.00647551	SOX4/INSM1/EMX1	3
GO:2000291	regulation of myoblast proliferation	3/229	20/18862	0.00172844	0.00993768	0.00647551	SOX15/GATA6/MEIS2	3
GO:2000678	negative regulation of transcription regulatory region DNA binding	3/229	20/18862	0.00172844	0.00993768	0.00647551	HEY1/HEY2/MSX1	3

## Sheet: Figure_4F and 4G
Source Data Figure_4F and 4G
Probe	Chromosome	Start	End	Probe.Strand	Feature	baseMean	log2FoldChange	padj	Wang_2017	BTSCs_DE
oe = 0.86	15	63127163	63128811	+	null	0.871654	5.42459	3.36714e-07	Other	Other
oe = 0.85	15	61837134	61838997	+	null	1.73867	4.68303	1.04699e-09	Other	Other
oe = 0.64	15	62692568	62694273	+	null	1.79466	4.44472	9.04008e-10	Other	Other
oe = 0.87	15	61026000	61027505	+	null	-0.164016	4.06093	0.00807481	Other	Other
61987050..61987052	15	61986550	61987552	+	Myc	3.84584	3.67973	1.04699e-09	Other	Other
61987008..61987016	15	61986508	61987516	+	Myc	3.80711	3.65937	1.04699e-09	Other	Other
61987070..61987074	15	61986570	61987574	+	Myc	3.82466	3.65385	1.17529e-09	Other	Other
61984917..61984918	15	61984417	61985418	+	Myc	3.76461	3.55048	1.22651e-08	Other	Other
61985152..61985153	15	61984652	61985653	+	Myc	4.00152	3.51339	4.65704e-09	Other	Other
61985332..61985333	15	61984832	61985833	-	Myc	4.09303	3.4719	5.48624e-09	Other	Other
oe = 0.79	15	61984449	61988716	+	Myc	5.3902	3.45038	1.17529e-09	Other	Other
oe = 0.67	15	65272338	65274071	+	null	-0.836257	3.16884	0.0469895	Other	Other
oe = 0.66	14	50061503	50063154	+	null	0.443533	3.0541	3.66555e-05	Other	Other
27342909..27342912	12	27342409	27343412	+	Sox11	1.21225	2.57326	7.93906e-08	Other	NonMES
27343050..27343050	12	27342550	27343550	+	Sox11	1.28071	2.52468	2.39555e-08	Other	NonMES
27343008..27343011	12	27342508	27343511	+	Sox11	1.2708	2.50981	2.90508e-08	Other	NonMES
27342599..27342603	12	27342099	27343103	-	Sox11	1.26621	2.50773	6.36427e-08	Other	NonMES
27343101..27343108	12	27342601	27343608	+	Sox11	1.29788	2.4926	6.67373e-09	Other	NonMES
27343156..27343162	12	27342656	27343662	-	Sox11	1.29462	2.48772	4.65704e-09	Other	NonMES
27343142..27343147	12	27342642	27343647	-	Sox11	1.30354	2.4796	4.65704e-09	Other	NonMES
oe = 0.68	15	65369722	65371461	+	null	-1.67815	2.46313	0.126932	Other	Other
102564505..102564507	6	102564005	102565007	+	null	0.0296135	2.42805	0.000312421	Other	Other
51358398..51358405	14	51357898	51358905	+	null	-2.38806	2.41253	0.00240747	Other	Other
51358433..51358433	14	51357933	51358933	+	null	-2.38806	2.41253	0.00240747	Other	Other
104367835..104367837	4	104367335	104368337	-	Dab1	0.794843	2.40683	4.83498e-06	Other	Other
12395410..12395415	8	12394910	12395915	-	Gm5607	0.05853	2.39099	0.0232488	Other	Other
12395397..12395403	8	12394897	12395903	-	Gm5607	0.0579034	2.39005	0.0232488	Other	Other
49215395..49215398	6	49214895	49215898	+	Igf2bp3	0.866798	2.38101	0.00012873	Other	Other
51358488..51358491	14	51357988	51358991	+	null	-2.41437	2.37306	0.00229427	Other	Other
51358381..51358392	14	51357881	51358892	-	null	-2.41879	2.36644	0.00382677	Other	Other
51358281..51358285	14	51357781	51358785	+	null	-2.43076	2.34848	0.00313343	Other	Other
51358297..51358299	14	51357797	51358799	+	null	-2.43076	2.34848	0.00313343	Other	Other
51358315..51358322	14	51357815	51358822	+	null	-2.43076	2.34848	0.00313343	Other	Other
51358351..51358352	14	51357851	51358852	+	null	-2.43076	2.34848	0.00313343	Other	Other
oe = 0.87	14	51357680	51359151	+	null	-2.08629	2.34163	0.00622351	Other	Other
27343397..27343402	12	27342897	27343902	-	Sox11	1.21684	2.33414	3.80153e-07	Other	NonMES
12395346..12395352	8	12394846	12395852	+	Gm5607	0.0638996	2.33207	0.0247728	Other	Other
oe = 0.87	12	27340687	27343961	+	Sox11	2.23282	2.31222	2.62862e-07	Other	NonMES
oe = 0.80	14	79773411	79774836	+	null	-0.71837	2.2774	0.00504563	Other	Other
104367881..104367887	4	104367381	104368387	-	Dab1	0.834378	2.27219	3.59876e-06	Other	Other
oe = 0.82	15	52124831	52126253	+	null	-2.27656	2.24815	0.0870116	Other	Other
12395582..12395585	8	12395082	12396085	-	Gm5607	0.12762	2.21663	0.0116929	Other	Other
54979354..54979357	14	54978854	54979857	-	Myh7	-1.44074	2.21153	0.00137979	Other	Other
oe = 0.81	14	122462930	122465786	+	Zic5	1.85062	2.20854	3.80153e-07	Other	Other
12395611..12395619	8	12395111	12396119	+	Gm5607	0.120646	2.20617	0.0126602	Other	Other
12395529..12395533	8	12395029	12396033	+	Gm5607	0.106914	2.18651	0.0137279	Other	Other
12395567..12395574	8	12395067	12396074	+	Gm5607	0.113902	2.17808	0.0144102	Other	Other
12395557..12395562	8	12395057	12396062	-	Gm5607	0.111385	2.1743	0.0143275	Other	Other
oe = 0.66	9	4795173	4796777	+	Gria4	0.696667	2.1712	0.000105596	Other	Other
54950446..54950447	14	54949946	54950947	-	Myh6	-1.18335	2.16982	0.00309318	Other	Other
122464535..122464541	14	122464035	122465041	+	Zic5	0.784548	2.14768	3.49912e-05	Other	Other
oe = 1.11	15	99029711	99031167	+	Tuba1c	-0.475603	2.14445	0.0194156	Other	Other
49383414..49383419	12	49382914	49383919	+	Foxg1	1.09947	2.14049	2.18809e-05	Other	Other
79769839..79769839	14	79769339	79770339	+	Pcdh8	-0.434463	2.13324	0.00673804	Other	Other
49383974..49383978	12	49383474	49384478	+	Foxg1	0.938473	2.12816	1.99848e-05	Other	Other
122464483..122464485	14	122463983	122464985	-	Zic5	0.746552	2.1274	5.88391e-05	Other	Other
122464487..122464489	14	122463987	122464989	+	Zic5	0.746552	2.1274	5.88391e-05	Other	Other
99030294..99030295	15	99029794	99030795	-	Tuba1c	-0.716385	2.12682	0.00993997	Other	Other
122464431..122464432	14	122463931	122464932	+	Zic5	0.727378	2.12035	5.15016e-05	Other	Other
27341658..27341659	12	27341158	27342159	+	Sox11	0.749514	2.11135	1.82936e-05	Other	NonMES
oe = 49.00	15	63572235	63573721	+	null	0.40632	2.1043	0.0908951	Other	Other
27341964..27341966	12	27341464	27342466	-	Sox11	0.895672	2.09552	2.50484e-05	Other	NonMES
27341596..27341604	12	27341096	27342104	-	Sox11	0.760677	2.09285	1.99848e-05	Other	NonMES
91365939..91365943	9	91365439	91366443	-	Zic1	-0.141649	2.08508	0.00132624	Other	Other
oe = 0.81	15	60822471	60825575	+	Fam84b	3.85608	2.05604	0.0520968	Other	Other
oe = 0.83	12	49382578	49386308	+	Foxg1	2.09235	2.04222	7.28145e-07	Other	Other
94404273..94404275	15	94403773	94404775	-	Adamts20	0.724815	2.03336	1.66278e-05	Other	Other
oe = 0.83	4	104366474	104368404	+	Dab1	1.40553	2.02194	7.28145e-07	Other	Other
104367608..104367612	4	104367108	104368112	-	Dab1	0.874552	2.01116	2.81584e-05	Other	Other
94404329..94404330	15	94403829	94404830	+	Adamts20	0.736845	2.00725	1.99848e-05	Other	Other
123105279..123105284	4	123104779	123105784	+	Bmp8b	-0.590034	2.0051	0.00784942	Other	Other
oe = 0.92	5	112576032	112577980	+	Sez6l	1.33318	2.00144	0.00017635	Other	Other
18360521..18360529	5	18360021	18361029	-	Gnai1	0.551566	1.96674	0.000633502	Other	Other
11115825..11115828	11	11115325	11116328	-	Vwc2	0.270721	1.96659	0.00185384	Other	Other
18360503..18360512	5	18360003	18361012	-	Gnai1	0.546915	1.95662	0.000617691	Other	Other
102564254..102564256	6	102563754	102564756	-	null	0.253749	1.9465	0.000112575	Other	Other
18360545..18360546	5	18360045	18361046	-	Gnai1	0.534427	1.94103	0.000623139	Other	Other
104367008..104367010	4	104366508	104367510	+	Dab1	0.653759	1.94071	3.56276e-05	Other	Other
oe = 0.70	6	102563673	102565078	+	null	0.434072	1.92432	8.59967e-05	Other	Other
oe = 0.97	6	49213260	49216106	+	Igf2bp3	1.67761	1.92248	0.000179797	Other	Other
94404404..94404407	15	94403904	94404907	+	Adamts20	0.747286	1.91464	3.60613e-05	Other	Other
oe = 0.70	14	116232525	116234446	+	Gpc5	-2.04126	1.91228	0.00640091	Other	Other
86395582..86395586	18	86395082	86396086	-	Neto1	0.166647	1.89744	0.00246198	Other	Other
oe = 0.66	X	58029832	58032408	+	Zic3	0.734102	1.88923	1.54949e-05	Other	Other
18360604..18360608	5	18360104	18361108	-	Gnai1	0.539369	1.88788	0.000177136	Other	Other
18360559..18360568	5	18360059	18361068	-	Gnai1	0.564565	1.87828	0.000187118	Other	Other
123105546..123105551	4	123105046	123106051	-	Bmp8b	-0.577861	1.86936	0.00039945	Other	Other
104367321..104367326	4	104366821	104367826	+	Dab1	0.949457	1.86005	2.74846e-06	Other	Other
69157260..69157267	17	69156760	69157767	-	Epb4.1l3	-1.08399	1.84507	0.0100909	Other	Other
oe = 0.88	14	69109099	69110955	+	null	-2.45131	1.84034	0.0282624	Other	Other
18360483..18360488	5	18359983	18360988	-	Gnai1	0.623793	1.83837	0.000347514	Other	Other
oe = 0.73	12	67220131	67223391	+	Mdga2	2.22285	1.83466	3.44406e-06	Other	Other
oe = 0.87	5	144861186	144862672	+	Trrap	-1.89807	1.83286	0.0137848	Other	Other
104367267..104367271	4	104366767	104367771	+	Dab1	0.899638	1.82529	2.7917e-06	Other	Other
79456688..79456695	2	79456188	79457195	+	Cerkl	-0.136984	1.81356	0.0504615	Other	Other
79768511..79768514	14	79768011	79769014	+	Pcdh8	-1.06037	1.80152	0.0111003	Other	Other
oe = 0.80	14	54631566	54633042	+	Cdh24	-0.822872	1.79727	0.0029511	Other	Other
18360464..18360475	5	18359964	18360975	-	Gnai1	0.639735	1.78567	0.000446783	Other	Other
69157174..69157182	17	69156674	69157682	+	Epb4.1l3	-1.02489	1.7638	0.0171255	Other	Other
oe = 0.84	14	61688951	61690562	+	null	-0.88585	1.7565	0.025709	Other	Other
18360419..18360423	5	18359919	18360923	-	Gnai1	0.700181	1.7432	0.000567273	Other	Other
56365009..56365015	14	56364509	56365515	+	Atp12a	-0.836583	1.73553	0.00351848	Other	Other
oe = 1.02	11	79790851	79792278	+	9130204K15Rik	-0.538469	1.73484	0.0251266	Other	Other
74668071..74668077	2	74667571	74668577	-	Hoxd13	-1.20289	1.73127	0.00870588	Other	Other
oe = 1.00	14	75424833	75426260	+	null	-2.87444	1.72863	0.00580104	Other	Other
oe = 0.73	14	78996485	78997946	+	1300010F03Rik	-2.04672	1.71599	0.00278646	Other	Other
oe = 0.79	14	54317823	54319275	+	null	-2.98394	1.69303	0.0045059	Other	Other
oe = 1.03	3	98306904	98308332	+	Hmgcs2	-1.85487	1.69009	0.013495	Other	Other
31579928..31579930	6	31579428	31580430	-	null	-1.04619	1.68357	0.0205079	Other	Other
18360316..18360316	5	18359816	18360816	+	Gnai1	0.722879	1.68068	0.000376121	Other	Other
79918505..79918508	10	79918005	79919008	+	Kiss1r	-0.836389	1.68052	0.0474099	Other	Other
91372039..91372041	4	91371539	91372541	-	Elavl2	0.529045	1.66502	8.134e-05	Other	Other
144861787..144861789	5	144861287	144862289	+	Trrap	-2.04273	1.6645	0.0171247	Other	Other
oe = 0.64	14	50007681	50009247	+	null	-2.8302	1.66175	0.00114681	Other	Other
81026809..81026809	12	81026309	81027309	+	Smoc1	0.371989	1.64966	0.0105393	Other	Other
oe = 0.86	14	56364196	56365841	+	Atp12a	-0.192386	1.64201	0.000801661	Other	Other
67221650..67221655	12	67221150	67222155	-	Mdga2	0.983429	1.63539	4.11677e-05	Other	Other
21215177..21215181	6	21214677	21215681	-	Kcnd2	0.359117	1.62504	0.000376121	Other	Other
oe = 0.64	14	68276601	68278777	+	null	-2.0709	1.62456	0.0516157	Other	Other
oe = 0.79	14	79767954	79771919	+	Pcdh8	1.69376	1.61557	1.93986e-06	Other	Other
oe = 0.87	5	18359233	18361248	+	Gnai1	1.15757	1.6152	0.000546699	Other	Other
122475529..122475535	14	122475029	122476035	+	2610035F20Rik	1.25018	1.60993	1.99848e-05	Other	Other
oe = 0.61	15	44015505	44017622	+	null	-2.08436	1.60906	0.186136	Other	Other
49385289..49385295	12	49384789	49385795	-	Foxg1	0.397771	1.60847	0.000128896	Other	Other
122475535..122475536	14	122475035	122476036	-	2610035F20Rik	1.24913	1.60836	1.99848e-05	Other	Other
oe = 0.78	15	94402729	94405175	+	Adamts20	1.36059	1.6067	4.41673e-05	Other	Other
25010665..25010667	7	25010165	25011167	+	Grik5	-1.17137	1.60577	0.0722261	Other	Other
69156991..69156992	17	69156491	69157492	+	Epb4.1l3	-1.15225	1.60456	0.0330351	Other	Other
oe = 0.79	11	11115179	11117017	+	Vwc2	0.921037	1.60261	0.000367843	Other	Other
oe = 0.79	14	49807554	49808975	+	null	-2.22337	1.59908	0.0670801	Other	Other
65262489..65262494	14	65261989	65262994	-	Fzd3	0.94112	1.58736	0.00022884	Other	Other
65262426..65262427	14	65261926	65262927	+	Fzd3	1.00163	1.58309	0.000140877	Other	Other
59076380..59076381	14	59075880	59076881	-	null	-1.00709	1.58282	0.0229396	Other	Other
oe = 0.89	18	86394713	86396173	+	Neto1	0.713574	1.58031	0.000105596	Other	Other
69156932..69156936	17	69156432	69157436	-	Epb4.1l3	-1.16936	1.57889	0.0350474	Other	Other
103810092..103810097	11	103809592	103810597	-	Wnt3	-0.0474208	1.57775	0.0753514	Other	Other
103810103..103810107	11	103809603	103810607	-	Wnt3	-0.0474208	1.57775	0.0753514	Other	Other
63607374..63607375	14	63606874	63607875	-	Gm15918	-0.178876	1.57041	0.00121658	Other	Other
49401652..49401654	12	49401152	49402154	-	3110039M20Rik	1.22362	1.57027	4.71981e-06	Other	Other
103810101..103810102	11	103809601	103810602	+	Wnt3	-0.0527724	1.56972	0.0775017	Other	Other
49385352..49385354	12	49384852	49385854	-	Foxg1	0.375913	1.56376	0.000215051	Other	Other
oe = 0.84	6	146706835	146708329	+	null	-2.23143	1.56148	0.0111503	Other	Other
oe = 0.71	X	120292368	120293811	+	Pcdh11x	-0.0785935	1.55555	0.00123927	Other	Other
102178605..102178607	X	102178105	102179107	+	null	-2.48723	1.55449	0.0442968	Other	Other
oe = 0.79	14	122473509	122476799	+	2610035F20Rik	2.37009	1.55365	2.90508e-08	Other	Other
103810044..103810052	11	103809544	103810552	-	Wnt3	-0.0526883	1.55204	0.0806124	Other	Other
111894839..111894841	X	111894339	111895341	+	null	-1.72516	1.55202	0.0194257	Other	Other
oe = 0.67	14	53935087	53936918	+	null	-3.10352	1.54968	0.031488	Other	Other
60893436..60893441	X	60892936	60893941	-	Sox3	-0.081285	1.54902	0.00366115	Other	Other
49384955..49384959	12	49384455	49385459	+	Foxg1	0.327036	1.54893	0.000221539	Other	Other
81026877..81026880	12	81026377	81027380	-	Smoc1	0.372316	1.5472	0.0170594	Other	Other
oe = 0.90	2	79456119	79457522	+	Cerkl	0.209726	1.54716	0.046095	Other	Other
74668130..74668132	2	74667630	74668632	+	Hoxd13	-1.27499	1.5468	0.0231421	Other	Other
oe = 0.65	14	49628028	49629525	+	null	-2.06336	1.54415	0.00635094	Other	Other
49401646..49401648	12	49401146	49402148	+	3110039M20Rik	1.23351	1.54405	5.58565e-06	Other	Other
oe = 0.86	14	123101124	123102636	+	null	-2.40155	1.54241	0.0194932	Other	Other
49384986..49384989	12	49384486	49385489	-	Foxg1	0.389297	1.54165	0.000230401	Other	Other
119524791..119524795	11	119524291	119525295	-	null	-1.01898	1.53024	0.059531	Other	Other
49385328..49385333	12	49384828	49385833	-	Foxg1	0.382572	1.52933	0.000199826	Other	Other
oe = 0.76	3	139530205	139532094	+	B930007M17Rik	-2.63673	1.52901	0.017637	Other	Other
oe = 0.94	12	49400794	49402252	+	3110039M20Rik	1.48498	1.52855	1.52355e-05	Other	Other
179442372..179442380	2	179441872	179442880	+	Cdh4	1.71411	1.52591	6.76245e-07	Other	Other
oe = 0.62	7	90526854	90528375	+	null	-2.79713	1.52459	0.00194599	Other	Other
oe = 0.81	8	12394705	12398179	+	Gm5607	1.28698	1.52039	0.0134727	Other	Other
65262240..65262245	14	65261740	65262745	-	Fzd3	1.05171	1.51932	0.000124734	Other	Other
21214967..21214970	6	21214467	21215470	+	Kcnd2	0.464919	1.51777	0.00035833	Other	Other
oe = 0.85	2	179441776	179444258	+	Cdh4	2.27041	1.51737	2.36696e-07	Other	Other
oe = 0.62	3	55608500	55610666	+	null	-2.0509	1.51464	0.0787048	Other	Other
102178647..102178652	X	102178147	102179152	+	null	-2.42302	1.51396	0.0509254	Other	Other
65262337..65262338	14	65261837	65262838	+	Fzd3	1.06467	1.50733	0.000123387	Other	Other
oe = 0.91	14	77076282	77078138	+	Ccdc122	-2.52417	1.50473	0.0751952	Other	Other
oe = 0.89	11	3894118	3895977	+	4921536K21Rik	0.847973	1.50187	1.72081e-05	Other	Other
oe = 0.83	3	45379154	45382183	+	Pcdh10	1.6456	1.50101	8.42305e-05	Other	Other
oe = 1.62	14	75327145	75328599	+	Zc3h13	-0.62357	1.50033	0.000713765	Other	Other
oe = 0.80	14	123792314	123793826	+	Itgbl1	-2.16162	1.49316	0.0237831	Other	Other
111894933..111894936	X	111894433	111895436	-	null	-1.7291	1.49113	0.0284529	Other	Other
103810011..103810017	11	103809511	103810517	+	Wnt3	-0.0719393	1.4905	0.0959898	Other	Other
140534449..140534452	5	140533949	140534952	-	null	-3.02538	1.48798	0.0281964	Other	Other
oe = 0.80	6	24954539	24956761	+	Tmem229a	2.08922	1.48764	3.33984e-06	Other	Other
122475622..122475623	14	122475122	122476123	+	2610035F20Rik	1.21197	1.48466	2.93654e-05	Other	Other
oe = 0.80	14	63244678	63246411	+	Gata4	0.162105	1.4844	0.00255965	Other	Other
oe = 0.62	14	57690793	57692251	+	Lats2	-0.353104	1.48409	0.011017	Other	Other
24956138..24956139	6	24955638	24956639	+	Tmem229a	1.54446	1.48262	4.51416e-06	Other	Other
65261978..65261986	14	65261478	65262486	+	Fzd3	0.971259	1.47833	0.000584692	Other	Other
oe = 0.70	14	40639002	40640422	+	null	-2.10329	1.47806	0.086106	Other	Other
120292949..120292951	X	120292449	120293451	-	Pcdh11x	-0.387784	1.4734	0.00568408	Other	Other
114564205..114564207	9	114563705	114564707	-	Trim71	0.706747	1.47069	0.00143091	Other	Other
65262163..65262170	14	65261663	65262670	-	Fzd3	1.07194	1.46773	0.000299669	Other	Other
oe = 0.92	9	114561781	114565096	+	Trim71	1.85464	1.46614	1.12428e-05	Other	Other
179442460..179442466	2	179441960	179442966	+	Cdh4	1.72453	1.4661	8.30793e-07	Other	Other
49217928..49217930	6	49217428	49218430	+	null	1.07916	1.46557	0.000176603	Other	Other
oe = 0.87	14	111674726	111676642	+	Slitrk5	0.756638	1.46389	0.00738309	Other	Other
oe = 0.89	8	43005327	43006767	+	null	-2.42976	1.46215	0.0404707	Other	Other
65262073..65262079	14	65261573	65262579	+	Fzd3	1.07556	1.45939	0.000689936	Other	Other
65262076..65262076	14	65261576	65262576	+	Fzd3	1.07556	1.45939	0.000689936	Other	Other
oe = 0.79	9	91363574	91366481	+	Zic1	1.19669	1.45761	0.00340434	Other	Other
oe = 0.82	4	91370665	91372667	+	Elavl2	1.08481	1.45608	5.22198e-05	Other	Other
65262054..65262060	14	65261554	65262560	-	Fzd3	1.03647	1.4463	0.000675402	Other	Other
103809956..103809962	11	103809456	103810462	-	Wnt3	-0.0741298	1.44529	0.113656	Other	Other
oe = 0.83	X	45252568	45254016	+	null	-2.57783	1.44304	0.0683744	Other	Other
oe = 0.87	14	76413540	76417051	+	Tsc22d1	2.24037	1.44185	1.00447e-06	Other	Other
49214325..49214329	6	49213825	49214829	+	Igf2bp3	0.583274	1.44151	0.00301119	Other	Other
64587156..64587161	14	64586656	64587661	-	null	-0.991817	1.4412	0.0786581	Other	Other
65262037..65262041	14	65261537	65262541	-	Fzd3	1.02632	1.44005	0.000634267	Other	Other
179442589..179442592	2	179442089	179443092	+	Cdh4	1.74994	1.43845	1.75161e-06	Other	Other
65262110..65262114	14	65261610	65262614	+	Fzd3	1.09816	1.4373	0.000588908	Other	Other
oe = 0.70	10	65662485	65664140	+	null	-1.83114	1.43222	0.117077	Other	Other
oe = 0.70	2	105674689	105676105	+	Pax6	1.60783	1.43176	2.50484e-05	Other	Other
179442563..179442571	2	179442063	179443071	+	Cdh4	1.7489	1.43037	1.8991e-06	Other	Other
oe = 0.83	14	60377607	60379775	+	Fam123a	1.39811	1.42904	9.83538e-05	Other	Other
oe = 0.68	12	81026205	81027702	+	Smoc1	0.774309	1.42884	0.00259288	Other	Other
125912002..125912002	1	125911502	125912502	+	Lypd1	0.67863	1.42589	0.000100225	Other	Other
65262128..65262131	14	65261628	65262631	+	Fzd3	1.0899	1.42491	0.000535876	Other	Other
179442624..179442626	2	179442124	179443126	-	Cdh4	1.7479	1.4228	1.93986e-06	Other	Other
oe = 0.91	1	103925565	103927005	+	null	-2.64319	1.41927	0.131738	Other	Other
oe = 1.01	15	99380204	99381703	+	null	-0.861764	1.41823	0.023669	Other	Other
oe = 0.87	14	84445320	84448529	+	Pcdh17	1.55346	1.41743	1.66278e-05	Other	Other
70958044..70958051	17	70957544	70958551	+	AC154187.1	-2.51718	1.41642	0.0994026	Other	Other
oe = 0.65	14	72914851	72917220	+	null	-3.27832	1.41613	0.0193885	Other	Other
69156887..69156894	17	69156387	69157394	-	Epb4.1l3	-1.27803	1.41589	0.0724001	Other	Other
oe = 0.62	11	40248352	40249868	+	Gm12132	-2.43004	1.41481	0.0312746	Other	Other
79536007..79536011	7	79535507	79536511	+	null	0.840165	1.41437	9.37991e-05	Other	Other
oe = 0.77	7	79534822	79536833	+	null	1.24334	1.41335	0.000260079	Other	Other
oe = 0.61	1	165526239	165528193	+	Adcy10	-1.93433	1.41333	0.077879	Other	Other
oe = 0.85	5	62976645	62978077	+	null	-2.02851	1.41218	0.0483761	Other	Other
60893305..60893309	X	60892805	60893809	+	Sox3	-0.0877841	1.40814	0.0097701	Other	Other
76074294..76074294	3	76073794	76074794	+	Fstl5	-0.179207	1.40683	0.016466	Other	Other
125911957..125911960	1	125911457	125912460	+	Lypd1	0.689716	1.40224	0.000135055	Other	Other
12396506..12396510	8	12396006	12397010	-	Gm5607	-0.400609	1.39449	0.0762728	Other	Other
76414418..76414421	14	76413918	76414921	-	Tsc22d1	1.41108	1.39388	3.37597e-05	Other	Other
74013135..74013137	7	74012635	74013637	-	St8sia2	0.0568228	1.39183	0.0114883	Other	Other
oe = 0.86	4	141477841	141479642	+	Spen	1.07042	1.39123	1.71854e-05	Other	Other
oe = 0.86	6	49217123	49218873	+	null	1.29108	1.39069	0.000489371	Other	Other
oe = 0.91	14	117178486	117179925	+	Gpc6	-2.19529	1.39066	0.0172168	Other	Other
63256053..63256056	14	63255553	63256556	-	Gata4	-1.12107	1.39005	0.00971161	Other	Other
oe = 0.80	X	60891399	60895039	+	Sox3	1.01346	1.38584	5.45764e-05	Other	Other
125490541..125490544	4	125490041	125491044	+	Grik3	-0.246398	1.38494	0.00932349	Other	Other
22344379..22344380	5	22343879	22344880	-	Reln	0.205918	1.38465	0.00132895	Other	Other
22344648..22344651	5	22344148	22345151	-	Reln	0.232011	1.38422	0.00185045	Other	Other
22344369..22344372	5	22343869	22344872	+	Reln	0.205328	1.38376	0.00103882	Other	Other
99820578..99820578	X	99820078	99821078	+	Tmem28	-1.65183	1.38372	0.0702858	Other	Other
179442721..179442723	2	179442221	179443223	-	Cdh4	1.71251	1.38224	3.44406e-06	Other	Other
179442708..179442712	2	179442208	179443212	+	Cdh4	1.72698	1.37887	2.9188e-06	Other	Other
52260432..52260437	6	52259932	52260937	+	Hoxa13	-1.01827	1.37813	0.0847412	Other	Other
52260433..52260442	6	52259933	52260942	-	Hoxa13	-1.01827	1.37813	0.0847412	Other	Other
oe = 0.73	X	158869351	158870786	+	null	-3.38294	1.37604	0.114163	Other	Other
76414491..76414497	14	76413991	76414997	-	Tsc22d1	1.50493	1.37294	2.76294e-05	Other	Other
87098864..87098864	1	87098364	87099364	+	Alpi	-0.759659	1.37224	0.0973395	Other	Other
99820595..99820597	X	99820095	99821097	-	Tmem28	-1.6602	1.37116	0.0720338	Other	Other
99657425..99657432	4	99656925	99657932	+	Foxd3	-1.14828	1.36919	0.0596555	Other	Other
85840686..85840689	11	85840186	85841189	-	Tbx2	-0.101341	1.36761	0.0344494	Other	Other
oe = 0.63	18	27233236	27235307	+	null	-2.47626	1.36727	0.148921	Other	Other
22344344..22344354	5	22343844	22344854	+	Reln	0.206221	1.36659	0.000904699	Other	Other
oe = 0.69	14	80354837	80356579	+	null	-2.20975	1.36461	0.070386	Other	Other
122475708..122475711	14	122475208	122476211	+	Zic2	1.07978	1.35778	0.000135055	Other	Other
oe = 0.69	11	97020951	97023081	+	Sp6	0.743489	1.35676	0.00100229	Other	Other
76414638..76414647	14	76414138	76415147	-	Tsc22d1	1.54028	1.35626	2.0407e-05	Other	Other
52260492..52260497	6	52259992	52260997	+	Hoxa13	-0.989772	1.35401	0.0930433	Other	Other
114563683..114563685	9	114563183	114564185	-	Trim71	0.770032	1.35392	0.000190791	Other	Other
21214872..21214873	6	21214372	21215373	-	Kcnd2	0.503369	1.35386	0.000409139	Other	Other
oe = 0.61	6	141361482	141363487	+	Pde3a	-2.31955	1.35318	0.0576342	Other	Other
22344321..22344329	5	22343821	22344829	+	Reln	0.206833	1.35282	0.000875597	Other	Other
oe = 0.89	14	65261234	65263379	+	Fzd3	1.47119	1.35179	0.000309966	Other	Other
oe = 1.00	14	52764063	52765490	+	null	-3.06565	1.35106	0.0336194	Other	Other
22344606..22344613	5	22344106	22345113	+	Reln	0.250334	1.35093	0.00198941	Other	Other
oe = 0.70	4	154960118	154962202	+	Gm20421	1.62635	1.34973	0.000161708	Other	Other
114563790..114563799	9	114563290	114564299	-	Trim71	0.746665	1.34735	0.000152765	Other	Other
oe = 1.55	5	18656073	18657487	+	null	-2.13269	1.34709	0.0293675	Other	Other
oe = 0.63	12	44482639	44484515	+	Nrcam	-2.30763	1.34415	0.102766	Other	Other
103809905..103809910	11	103809405	103810410	+	Wnt3	-0.129812	1.34285	0.144822	Other	Other
oe = 0.93	7	79504273	79505982	+	Mir9-3	0.990666	1.34275	7.77708e-05	Other	Other
103809926..103809938	11	103809426	103810438	+	Wnt3	-0.143803	1.34078	0.144936	Other	Other
114563847..114563854	9	114563347	114564354	+	Trim71	0.752856	1.33787	0.000240452	Other	Other
52260124..52260125	6	52259624	52260625	+	Hoxa13	-0.970398	1.33723	0.0432591	Other	Other
oe = 0.74	10	118910008	118911642	+	null	-2.40762	1.33698	0.0777347	Other	Other
oe = 0.92	4	123104119	123106143	+	Bmp8b	0.260056	1.33691	0.00319695	Other	Other
114563825..114563834	9	114563325	114564334	+	Trim71	0.764731	1.3363	0.000169254	Other	Other
114563675..114563683	9	114563175	114564183	+	Trim71	0.770976	1.33623	0.000220604	Other	Other
114563600..114563606	9	114563100	114564106	+	Trim71	0.780701	1.33599	0.000340145	Other	Other
114563851..114563851	9	114563351	114564351	+	Trim71	0.750345	1.3341	0.000236283	Other	Other
52260536..52260539	6	52260036	52261039	+	Hoxa13	-1.00341	1.33355	0.10027	Other	Other
oe = 0.74	14	65342961	65344649	+	null	1.96404	1.32989	3.74319e-07	Other	Other
125490471..125490478	4	125489971	125490978	+	Grik3	-0.174665	1.32888	0.0150832	Other	Other
114563570..114563573	9	114563070	114564073	+	Trim71	0.766388	1.32808	0.000524113	Other	Other
154960919..154960926	4	154960419	154961426	+	Gm20421	1.1678	1.32761	0.000304137	Other	Other
114563836..114563841	9	114563336	114564341	-	Trim71	0.771412	1.32755	0.000161708	Other	Other
oe = 0.68	1	125910949	125912749	+	Lypd1	1.0744	1.32749	0.00013794	Other	Other
114563671..114563674	9	114563171	114564174	-	Trim71	0.752196	1.32716	0.000345953	Other	Other
114563618..114563635	9	114563118	114564135	-	Trim71	0.806167	1.32665	0.000336321	Other	Other
12396723..12396728	8	12396223	12397228	+	Gm5607	-0.701869	1.32639	0.0840953	Other	Other
52260539..52260543	6	52260039	52261043	-	Hoxa13	-1.00841	1.32606	0.100761	Other	Other
oe = 0.86	15	30171859	30174048	+	Ctnnd2	1.78242	1.32464	1.17185e-06	Other	NonMES
99820490..99820494	X	99819990	99820994	+	Tmem28	-1.68719	1.32442	0.103196	Other	Other
114563714..114563719	9	114563214	114564219	-	Trim71	0.800357	1.32362	0.000327863	Other	Other
oe = 0.78	15	7366015	7367774	+	Egflam	-2.14508	1.32098	0.0684257	Other	Other
49172200..49172205	14	49171700	49172705	+	Naa30	1.29349	1.32073	0.000167723	Other	Other
154549762..154549764	2	154549262	154550264	+	Necab3	0.219829	1.32049	0.00612863	Other	Other
109978063..109978065	4	109977563	109978565	+	3010003L10Rik	0.795356	1.32026	0.00589911	Other	Other
52260400..52260404	6	52259900	52260904	+	Hoxa13	-1.05814	1.31834	0.118763	Other	Other
76415316..76415320	14	76414816	76415820	-	Tsc22d1	1.16532	1.31833	5.35814e-05	Other	Other
oe = 0.77	14	60154896	60156315	+	Atp8a2	-1.8284	1.31805	0.0455426	Other	Other
97151141..97151145	11	97150641	97151645	+	Tbkbp1	0.944384	1.31796	0.000789749	Other	Other
oe = 0.86	8	33150769	33152279	+	null	-3.22801	1.31729	0.115478	Other	Other
65261916..65261921	14	65261416	65262421	+	Fzd3	0.926261	1.31637	0.00070858	Other	Other
61665998..61666002	13	61665498	61666502	+	null	-2.52894	1.3156	0.160892	Other	Other
oe = 0.87	14	49171498	49173772	+	Naa30	1.87575	1.31532	1.66824e-05	Other	Other
114563635..114563640	9	114563135	114564140	+	Trim71	0.798516	1.31518	0.000452333	Other	Other
114563615..114563623	9	114563115	114564123	+	Trim71	0.797957	1.31434	0.000383171	Other	Other
oe = 0.83	1	132879811	132881446	+	Lrrn2	1.50996	1.31407	7.27201e-05	Other	Other
65343710..65343717	14	65343210	65344217	-	null	1.75861	1.3133	6.05136e-07	Other	Other
114563690..114563698	9	114563190	114564198	-	Trim71	0.79255	1.31283	0.00027577	Other	Other
71967043..71967046	14	71966543	71967546	+	null	-1.41455	1.31197	0.116141	Other	Other
22344580..22344590	5	22344080	22345090	+	Reln	0.309811	1.31176	0.00114382	Other	Other
154549635..154549637	2	154549135	154550137	+	Necab3	0.257516	1.3108	0.00585461	Other	Other
136637761..136637767	4	136637261	136638267	+	Lactbl1	-1.17092	1.30932	0.177712	Other	Other
22344477..22344481	5	22343977	22344981	+	Reln	0.22494	1.30923	0.00155727	Other	Other
109978042..109978044	4	109977542	109978544	+	3010003L10Rik	0.767604	1.30912	0.00738309	Other	Other
136637782..136637784	4	136637282	136638284	-	Lactbl1	-1.17033	1.30755	0.178329	Other	Other
73545665..73545670	12	73545165	73546170	+	Tmem30b	-0.439857	1.30605	0.00575538	Other	Other
60893002..60893007	X	60892502	60893507	+	Sox3	-0.115331	1.30446	0.0144102	Other	Other
43801972..43801974	17	43801472	43802474	-	Rcan2	0.388157	1.30445	0.00715617	Other	Other
oe = 0.77	19	50677508	50679459	+	Sorcs1	0.769891	1.30327	5.79447e-05	Other	Other
89930753..89930756	1	89930253	89931256	+	Gbx2	0.820519	1.30275	0.00092813	Other	Other
67222215..67222218	12	67221715	67222718	-	Mdga2	1.21491	1.30268	4.06563e-05	Other	Other
99820768..99820770	X	99820268	99821270	+	Tmem28	-1.73518	1.30162	0.132549	Other	Other
89930181..89930181	1	89929681	89930681	+	Gbx2	0.571505	1.30146	0.00521072	Other	Other
32890073..32890076	10	32889573	32890576	-	Nkain2	0.895337	1.30113	0.000162167	Other	Other
oe = 0.82	10	32889356	32890855	+	Nkain2	1.35365	1.3009	3.15192e-05	Other	Other
22344393..22344397	5	22343893	22344897	-	Reln	0.226122	1.30077	0.00249807	Other	Other
154960864..154960872	4	154960364	154961372	-	Gm20421	1.15576	1.30058	0.000391577	Other	Other
oe = 0.88	14	107165108	107167173	+	null	-2.72188	1.29763	0.0475612	Other	Other
22344554..22344561	5	22344054	22345061	-	Reln	0.303078	1.29747	0.00127408	Other	Other
65343649..65343653	14	65343149	65344153	+	null	1.74241	1.29693	7.28145e-07	Other	Other
114563558..114563568	9	114563058	114564068	-	Trim71	0.773718	1.29576	0.000383841	Other	Other
65261892..65261894	14	65261392	65262394	+	Fzd3	0.846481	1.29547	0.000549248	Other	Other
oe = 0.95	7	45076055	45077470	+	Nosip	0.276651	1.29536	0.000479532	Other	Other
76415341..76415345	14	76414841	76415845	-	Tsc22d1	1.14292	1.29496	7.00675e-05	Other	Other
oe = 0.77	14	124414620	124416462	+	Fgf14	-2.40571	1.29489	0.234632	Other	Other
oe = 0.78	14	64586533	64588358	+	null	-0.215583	1.29156	0.0608791	Other	Other
179442811..179442811	2	179442311	179443311	+	Cdh4	1.64779	1.29114	1.1778e-05	Other	Other
oe = 0.72	15	103085424	103087298	+	null	1.12291	1.29105	0.000140877	Other	Other
oe = 0.62	14	80088643	80091011	+	null	-2.05261	1.29045	0.0216422	Other	Other
oe = 0.91	14	62555012	62556470	+	Fam124a	1.04899	1.2902	0.000637382	Other	Other
oe = 0.85	17	69156174	69158046	+	Epb4.1l3	-0.506543	1.29007	0.022197	Other	Other
49172249..49172253	14	49171749	49172753	+	Naa30	1.33897	1.28849	0.000140877	Other	Other
oe = 0.60	X	71961784	71963547	+	Prrg3	-0.15567	1.28847	0.0146164	Other	Other
57057594..57057595	14	57057094	57058095	-	Gja3	-0.438612	1.28611	0.0239073	Other	Other
65098126..65098131	14	65097626	65098631	-	Extl3	1.39919	1.2854	4.27615e-05	Other	Other
97151115..97151120	11	97150615	97151620	+	Tbkbp1	0.983026	1.28399	0.000777349	Other	Other
oe = 0.77	3	91094633	91100512	+	null	-2.34004	1.28326	0.326186	Other	Other
57057610..57057615	14	57057110	57058115	+	Gja3	-0.414609	1.28259	0.0284377	Other	Other
114563580..114563584	9	114563080	114564084	-	Trim71	0.77394	1.28004	0.00059715	Other	Other
oe = 0.85	18	50537608	50539464	+	null	-2.36828	1.27918	0.118762	Other	Other
114563772..114563775	9	114563272	114564275	-	Trim71	0.744627	1.2791	0.000376894	Other	Other
89930781..89930784	1	89930281	89931284	+	Gbx2	0.838304	1.27756	0.000918924	Other	Other
oe = 0.71	2	154548962	154550469	+	Necab3	0.757742	1.27665	0.000530882	Other	Other
oe = 0.87	9	16501388	16502921	+	null	0.924369	1.27463	0.00039904	Other	Other
154960804..154960808	4	154960304	154961308	+	Gm20421	1.12035	1.27373	0.000497991	Other	Other
61666004..61666010	13	61665504	61666510	-	null	-2.55729	1.27307	0.171834	Other	Other
61666025..61666026	13	61665525	61666526	-	null	-2.55729	1.27307	0.171834	Other	Other
76415254..76415261	14	76414754	76415761	+	Tsc22d1	1.19525	1.27298	5.82595e-05	Other	Other
oe = 0.61	13	3109042	3111208	+	null	-3.0833	1.27245	0.197216	Other	Other
oe = 0.75	12	18162220	18163864	+	null	-2.66847	1.27097	0.323327	Other	Other
99820724..99820730	X	99820224	99821230	+	Tmem28	-1.72475	1.27034	0.147719	Other	Other
oe = 0.68	4	128438264	128440181	+	Csmd2	-2.7877	1.26865	0.0272922	Other	Other
oe = 0.77	17	42315600	42317355	+	3110082D06Rik	1.02204	1.26674	6.28362e-05	Other	Other
179442846..179442851	2	179442346	179443351	-	Cdh4	1.59397	1.26664	2.50484e-05	Other	Other
oe = 0.60	11	53465922	53467396	+	Shroom1	-0.289384	1.26612	0.151279	Other	Other
32890130..32890131	10	32889630	32890631	+	Nkain2	0.966333	1.26485	0.000116519	Other	Other
22344422..22344422	5	22343922	22344922	+	Reln	0.213459	1.26365	0.0026269	Other	Other
49172790..49172796	14	49172290	49173296	-	Naa30	1.21586	1.26315	8.37933e-05	Other	Other
oe = 0.97	13	85598420	85599847	+	null	-2.69846	1.25993	0.0512415	Other	Other
52260786..52260787	6	52260286	52261287	-	Hoxa13	-1.29	1.25879	0.118356	Other	Other
oe = 0.75	5	19226001	19227528	+	Magi2	1.22661	1.25741	0.000161708	Other	Other
179442853..179442855	2	179442353	179443355	+	Cdh4	1.58665	1.25566	2.50484e-05	Other	Other
60379203..60379205	14	60378703	60379705	-	Fam123a	0.484807	1.25557	0.00241093	Other	Other
49525683..49525687	14	49525183	49526187	+	Slc35f4	-0.637468	1.25464	0.0211579	Other	Other
oe = 0.63	13	58805918	58809269	+	Ntrk2	1.64412	1.25331	7.28145e-07	Other	Other
49172336..49172337	14	49171836	49172837	+	Naa30	1.33842	1.25233	9.76409e-05	Other	Other
146725008..146725013	1	146724508	146725513	-	Fam5c	-2.02197	1.25133	0.0835933	Other	Other
oe = 0.75	2	18039196	18040644	+	Gm13330	-0.424168	1.25114	0.0342887	Other	Other
76415382..76415385	14	76414882	76415885	-	Tsc22d1	1.07592	1.24976	0.00010475	Other	Other
oe = 1.54	12	23051466	23052948	+	null	-3.46782	1.24872	0.175257	Other	Other
97151059..97151065	11	97150559	97151565	-	Tbkbp1	1.03809	1.24835	0.000450792	Other	Other
32890093..32890099	10	32889593	32890599	-	Nkain2	0.912895	1.24779	0.000280331	Other	Other
33430779..33430782	5	33430279	33431282	+	Nkx1-1	-0.529235	1.24718	0.165688	Other	Other
22344673..22344681	5	22344173	22345181	-	Reln	0.223161	1.24636	0.00266384	Other	Other
84069883..84069888	12	84069383	84070388	-	Acot5	-0.972418	1.24582	0.0473389	Other	Other
47014681..47014686	19	47014181	47015186	+	Nt5c2	0.907062	1.24552	2.50484e-05	Other	Other
114562952..114562956	9	114562452	114563456	+	Trim71	0.30131	1.24345	0.00202281	Other	Other
49525817..49525818	14	49525317	49526318	-	Slc35f4	-0.767117	1.24283	0.0174859	Other	Other
103810146..103810150	11	103809646	103810650	+	Wnt3	0.0542702	1.24065	0.0509934	Other	Other
21214838..21214839	6	21214338	21215339	+	Kcnd2	0.548512	1.23871	0.000675402	Other	Other
76415133..76415137	14	76414633	76415637	+	Tsc22d1	1.30783	1.23665	0.000122263	Other	Other
74013027..74013031	7	74012527	74013531	+	St8sia2	0.0747379	1.23463	0.0193193	Other	Other
oe = 0.83	4	119929636	119931076	+	Hivep3	-1.71302	1.23461	0.0741754	Other	Other
76415419..76415423	14	76414919	76415923	-	Tsc22d1	1.04619	1.23306	0.000106816	Other	Other
32890010..32890012	10	32889510	32890512	+	Nkain2	0.846036	1.23257	0.00139446	Other	Other
47014749..47014753	19	47014249	47015253	-	Nt5c2	0.957494	1.2285	2.40315e-05	Other	Other
49172377..49172384	14	49171877	49172884	+	Naa30	1.36836	1.22836	8.61207e-05	Other	Other
49172438..49172439	14	49171938	49172939	+	Naa30	1.36787	1.22769	5.4133e-05	Other	Other
oe = 0.82	6	107300056	107301628	+	null	-1.99403	1.22754	0.177265	Other	Other
oe = 0.82	10	94943101	94946066	+	Plxnc1	1.70342	1.22646	1.40573e-05	Other	Other
oe = 0.89	14	14427733	14429314	+	null	-3.31937	1.22591	0.087212	Other	Other
52260152..52260153	6	52259652	52260653	+	Hoxa13	-1.00981	1.22589	0.105657	Other	Other
oe = 0.78	14	66909578	66911829	+	Pnma2	0.771753	1.22447	0.000530882	Other	Other
oe = 1.46	12	112020004	112021520	+	Tdrd9	-2.46592	1.22403	0.181315	Other	Other
oe = 0.71	X	9003003	9004468	+	null	-2.79858	1.22365	0.0729164	Other	Other
125490397..125490401	4	125489897	125490901	-	Grik3	-0.212644	1.22361	0.0227014	Other	Other
oe = 0.89	15	77994605	77996054	+	Cacng2	-0.497116	1.22323	0.186988	Other	Other
oe = 0.73	14	100054763	100056466	+	Klf12	-2.35477	1.22249	0.208855	Other	Other
oe = 0.81	1	89929583	89931898	+	Gbx2	1.27937	1.22246	3.58514e-05	Other	Other
99657485..99657488	4	99656985	99657988	-	Foxd3	-1.24658	1.22174	0.0787938	Other	Other
47015134..47015137	19	47014634	47015637	+	Nt5c2	1.05419	1.21996	2.8653e-05	Other	Other
76415203..76415204	14	76414703	76415704	-	Tsc22d1	1.23504	1.21836	0.00017515	Other	Other
12397152..12397157	8	12396652	12397657	+	Gm5607	-0.33701	1.21759	0.0560418	Other	Other
146725027..146725029	1	146724527	146725529	+	Fam5c	-2.10064	1.21754	0.0673666	Other	Other
62555756..62555757	14	62555256	62556257	-	Fam124a	0.88486	1.21738	0.00115928	Other	Other
47014626..47014631	19	47014126	47015131	-	Nt5c2	0.85666	1.2168	2.8653e-05	Other	Other
oe = 0.86	12	114240939	114242389	+	null	-3.14052	1.21524	0.327794	Other	Other
120602177..120602179	1	120601677	120602679	+	En1	-0.189111	1.21456	0.0297722	Other	Other
120602203..120602207	1	120601703	120602707	-	En1	-0.190043	1.21316	0.0329563	Other	Other
oe = 0.80	4	109976833	109979115	+	3010003L10Rik	1.29478	1.21287	0.00535811	Other	Other
65097921..65097924	14	65097421	65098424	-	Extl3	1.47131	1.21154	3.75544e-05	Other	Other
oe = 0.83	14	106720557	106723241	+	null	-2.90951	1.21029	0.0672137	Other	Other
114562926..114562928	9	114562426	114563428	-	Trim71	0.344468	1.21029	0.00259779	Other	Other
97151047..97151051	11	97150547	97151551	-	Tbkbp1	1.02991	1.21001	0.000986639	Other	Other
49214139..49214142	6	49213639	49214642	+	Igf2bp3	0.3258	1.2094	0.0153255	Other	Other
30172613..30172620	15	30172113	30173120	+	Ctnnd2	1.03417	1.20935	5.0957e-05	Other	NonMES
114562937..114562940	9	114562437	114563440	+	Trim71	0.318967	1.20916	0.00240623	Other	Other
62555772..62555774	14	62555272	62556274	+	Fam124a	0.878989	1.20857	0.00115944	Other	Other
oe = 0.86	16	42984455	42986175	+	Zbtb20	-2.27464	1.20727	0.231669	Other	Other
99820338..99820346	X	99819838	99820846	+	Tmem28	-1.61043	1.20647	0.183763	Other	Other
oe = 0.73	9	5934019	5935577	+	null	-2.71081	1.20539	0.295101	Other	Other
oe = 0.73	2	26762986	26764422	+	null	-1.53673	1.20442	0.0915824	Other	Other
63256017..63256025	14	63255517	63256525	-	Gata4	-1.05873	1.20302	0.0160872	Other	Other
63256036..63256039	14	63255536	63256539	+	Gata4	-1.05873	1.20302	0.0160872	Other	Other
oe = 1.03	3	54810473	54811905	+	Gm10254	-1.02003	1.20293	0.0835122	Other	Other
52260841..52260846	6	52260341	52261346	+	Hoxa13	-1.34137	1.20173	0.113606	Other	Other
76415511..76415514	14	76415011	76416014	+	Tsc22d1	0.953141	1.2009	0.00017515	Other	Other
oe = 0.83	14	46211153	46212797	+	null	-2.87852	1.19896	0.0843437	Other	Other
62760525..62760526	14	62760025	62761026	-	Ints6	1.49198	1.19807	2.62027e-05	Other	Other
64502283..64502284	7	64501783	64502784	+	Apba2	0.327659	1.19749	0.000979842	Other	NonMES
oe = 0.77	7	74012102	74014610	+	St8sia2	1.11442	1.19667	0.000260079	Other	Other
76415454..76415459	14	76414954	76415959	-	Tsc22d1	1.02179	1.19648	0.000188972	Other	Other
oe = 0.83	3	88240497	88241913	+	Rhbg	0.482959	1.19632	0.000184739	Other	Other
42431712..42431716	19	42431212	42432216	+	Crtac1	-0.957136	1.19461	0.209389	Other	Other
oe = 0.79	14	61680930	61683636	+	null	2.68939	1.19273	9.29074e-06	Other	Other
oe = 0.64	10	32822209	32824066	+	null	-1.97124	1.19142	0.0915585	Other	Other
64502013..64502017	7	64501513	64502517	+	Apba2	0.407211	1.18981	0.00138456	Other	NonMES
64502032..64502032	7	64501532	64502532	+	Apba2	0.396473	1.18962	0.00155607	Other	NonMES
47015154..47015157	19	47014654	47015657	-	Nt5c2	1.07082	1.18779	2.54939e-05	Other	Other
oe = 0.63	8	58387864	58390155	+	null	-1.86088	1.18713	0.136353	Other	Other
oe = 0.80	12	27338311	27340194	+	Sox11	0.63985	1.18677	0.00201371	Other	NonMES
oe = 0.84	14	65097197	65098787	+	Extl3	1.59264	1.18591	4.51716e-05	Other	Other
74668673..74668678	2	74668173	74669178	-	Hoxd13	-0.914347	1.18523	0.123777	Other	Other
60378245..60378248	14	60377745	60378748	+	Fam123a	0.905663	1.18484	0.000383841	Other	Other
125490084..125490088	4	125489584	125490588	-	Grik3	-0.339605	1.18471	0.0116365	Other	Other
73325970..73325976	14	73325470	73326476	+	Rb1	0.927199	1.18244	0.000211368	Other	Other
62555575..62555581	14	62555075	62556081	+	Fam124a	0.827211	1.18241	0.00242193	Other	Other
88241316..88241317	3	88240816	88241817	-	Rhbg	0.153641	1.18203	0.00777131	Other	Other
80287394..80287394	15	80286894	80287894	+	Cacna1i	-1.04168	1.18195	0.144294	Other	Other
179442901..179442906	2	179442401	179443406	+	Cdh4	1.50835	1.18187	2.8653e-05	Other	Other
91364880..91364881	9	91364380	91365381	-	Zic1	0.185457	1.18181	0.0451889	Other	Other
45658265..45658265	14	45657765	45658765	+	Ddhd1	1.63535	1.18124	8.42305e-05	Other	Other
oe = 0.89	14	54617032	54618622	+	Psmb5	0.773849	1.18034	0.0134195	Other	Other
49172478..49172491	14	49171978	49172991	-	Naa30	1.36232	1.17935	5.35814e-05	Other	Other
45657977..45657985	14	45657477	45658485	-	Ddhd1	1.76674	1.1792	0.00013585	Other	Other
114562978..114562983	9	114562478	114563483	+	Trim71	0.323276	1.17796	0.00181809	Other	Other
26895375..26895378	15	26894875	26895878	+	Fbxl7	1.51714	1.17747	5.60367e-06	Other	Other
oe = 0.90	14	45656606	45658928	+	Ddhd1	2.23441	1.17745	2.53865e-05	Other	Other
26895546..26895552	15	26895046	26896052	-	Fbxl7	1.49469	1.17715	1.10875e-05	Other	Other
60378202..60378207	14	60377702	60378707	+	Fam123a	0.899959	1.17706	0.000376121	Other	Other
oe = 0.72	14	101009407	101010834	+	null	-2.20877	1.17596	0.246235	Other	Other
64502040..64502046	7	64501540	64502546	+	Apba2	0.407807	1.17498	0.00193345	Other	NonMES
oe = 0.94	14	72310715	72312151	+	null	-2.96164	1.17488	0.182259	Other	Other
22344700..22344711	5	22344200	22345211	-	Reln	0.215487	1.17408	0.00482202	Other	Other
oe = 0.80	7	45006691	45009024	+	Scaf1	0.642877	1.17316	0.00816582	Other	Other
oe = 0.67	8	82644146	82645621	+	null	-1.85439	1.17254	0.150201	Other	Other
64502087..64502094	7	64501587	64502594	-	Apba2	0.384544	1.17208	0.00152305	Other	NonMES
52260234..52260236	6	52259734	52260736	+	Hoxa13	-0.849038	1.17085	0.0539263	Other	Other
45658338..45658341	14	45657838	45658841	-	Ddhd1	1.597	1.17057	4.06563e-05	Other	Other
26895692..26895697	15	26895192	26896197	+	Fbxl7	1.43598	1.1704	3.19575e-05	Other	Other
114563493..114563497	9	114562993	114563997	+	Trim71	0.780317	1.17024	0.000819894	Other	Other
45657887..45657893	14	45657387	45658393	+	Ddhd1	1.78714	1.17018	0.000128799	Other	Other
45658011..45658015	14	45657511	45658515	-	Ddhd1	1.75461	1.17015	9.14395e-05	Other	Other
95528061..95528063	15	95527561	95528563	+	Nell2	0.351127	1.17002	0.0172711	Other	Other
45657941..45657944	14	45657441	45658444	-	Ddhd1	1.76756	1.16981	0.000145645	Other	Other
oe = 0.68	X	6081441	6083868	+	AU022751	-0.747555	1.1698	0.149635	Other	Other
73325983..73325984	14	73325483	73326484	+	Rb1	0.91866	1.16963	0.000253258	Other	Other
64501934..64501938	7	64501434	64502438	-	Apba2	0.389285	1.16904	0.00203146	Other	NonMES
oe = 0.82	19	47014011	47016245	+	Nt5c2	1.57374	1.16824	2.50484e-05	Other	Other
73325902..73325910	14	73325402	73326410	+	Rb1	0.998847	1.16808	0.000160772	Other	Other
70892752..70892760	8	70892252	70893260	-	Slc5a5	-0.166463	1.16775	0.0792738	Other	Other
64501922..64501927	7	64501422	64502427	-	Apba2	0.394032	1.16726	0.00319461	Other	NonMES
47015189..47015192	19	47014689	47015692	-	Nt5c2	1.06278	1.16676	3.15192e-05	Other	Other
73325950..73325955	14	73325450	73326455	-	Rb1	0.94594	1.16537	0.000208928	Other	Other
12397282..12397283	8	12396782	12397783	-	Gm5607	-0.236963	1.16461	0.0576991	Other	Other
oe = 0.62	2	155941344	155942831	+	Gm15557	0.117523	1.16364	0.00487751	Other	Other
oe = 0.73	14	54925354	54927472	+	Efs	1.81055	1.16338	8.134e-05	Other	Other
oe = 1.74	2	181919468	181920915	+	null	-3.31971	1.16332	0.129322	Other	Other
45657995..45658001	14	45657495	45658501	-	Ddhd1	1.75266	1.16206	0.00010475	Other	Other
oe = 0.75	14	122490033	122491477	+	Gm10837	-0.184126	1.162	0.0075858	Other	Other
12397219..12397220	8	12396719	12397720	+	Gm5607	-0.270586	1.16174	0.0657863	Other	Other
89931002..89931007	1	89930502	89931507	+	Gbx2	0.726796	1.16108	0.000356782	Other	Other
89930994..89930998	1	89930494	89931498	-	Gbx2	0.725876	1.15969	0.000489371	Other	Other
87730602..87730607	9	87730102	87731107	-	Tbx18	0.100867	1.15959	0.0186683	Other	Other
oe = 0.79	18	45363668	45365157	+	Kcnn2	-2.14329	1.15815	0.124106	Other	Other
26895637..26895641	15	26895137	26896141	-	Fbxl7	1.45183	1.15765	2.74929e-05	Other	Other
oe = 0.71	1	120602344	120604490	+	En1	1.03191	1.15765	0.00613482	Other	Other
oe = 0.97	16	41201379	41202806	+	null	-2.34351	1.15708	0.195684	Other	Other
45658035..45658035	14	45657535	45658535	+	Ddhd1	1.74573	1.15684	0.000100197	Other	Other
45658040..45658049	14	45657540	45658549	-	Ddhd1	1.74573	1.15684	0.000100197	Other	Other
oe = 0.66	14	55112915	55115927	+	Jph4	1.54245	1.1568	6.28362e-05	Other	Other
64502093..64502098	7	64501593	64502598	+	Apba2	0.374348	1.15679	0.00138456	Other	NonMES
60378312..60378315	14	60377812	60378815	+	Fam123a	0.958724	1.15674	0.000735767	Other	Other
95528020..95528022	15	95527520	95528522	+	Nell2	0.376089	1.15623	0.0204774	Other	Other
114563009..114563012	9	114562509	114563512	-	Trim71	0.332184	1.15555	0.00226409	Other	Other
70892810..70892812	8	70892310	70893312	+	Slc5a5	-0.156493	1.15373	0.0839102	Other	Other
oe = 0.80	2	151159441	151161505	+	null	-3.13848	1.15366	0.121804	Other	Other
47015243..47015249	19	47014743	47015749	+	Nt5c2	1.07636	1.15338	2.91049e-05	Other	Other
oe = 0.65	5	102408431	102410588	+	null	-2.41334	1.15286	0.0887155	Other	Other
179442888..179442890	2	179442388	179443390	-	Cdh4	1.52799	1.15272	3.7507e-05	Other	Other
oe = 0.93	14	54426170	54427641	+	Mrpl52	1.3308	1.15257	5.16887e-05	Other	Other
124354784..124354790	5	124354284	124355290	-	Cdk2ap1	-0.37055	1.15245	0.0418155	Other	Other
185458356..185458357	1	185457856	185458857	+	Slc30a10	-1.974	1.15143	0.304166	Other	Other
oe = 0.67	6	56298995	56300527	+	Pde1c	-2.05957	1.15113	0.171957	Other	Other
54926470..54926473	14	54925970	54926973	+	Efs	1.34152	1.15099	2.8542e-05	Other	Other
47015255..47015256	19	47014755	47015756	-	Nt5c2	1.06661	1.15089	2.8653e-05	Other	Other
oe = 0.91	3	87996518	87997948	+	Bcan	0.029009	1.15076	0.0233277	Other	NonMES
oe = 0.88	14	62331403	62332936	+	Rnaseh2b	1.31991	1.15013	0.000457925	Other	Other
30172820..30172827	15	30172320	30173327	-	Ctnnd2	1.15072	1.15005	0.000124909	Other	NonMES
12396685..12396689	8	12396185	12397189	-	Gm5607	-0.593742	1.14985	0.1649	Other	Other
30172861..30172864	15	30172361	30173364	-	Ctnnd2	1.16773	1.14985	7.95875e-05	Other	NonMES
oe = 0.86	15	95527247	95529212	+	Nell2	0.82951	1.14725	0.00446971	Other	Other
80287384..80287387	15	80286884	80287887	+	Cacna1i	-1.04895	1.14723	0.156216	Other	Other
oe = 0.74	18	36931069	36932715	+	Pcdhac1	-0.853113	1.14712	0.0843437	Other	Other
oe = 0.70	14	13693310	13695052	+	null	-2.42964	1.14607	0.187943	Other	Other
45657923..45657929	14	45657423	45658429	+	Ddhd1	1.76629	1.14553	0.000187292	Other	Other
49525639..49525645	14	49525139	49526145	+	Slc35f4	-0.588548	1.14395	0.0309907	Other	Other
oe = 0.91	14	70442396	70444394	+	Polr3d	1.74168	1.14365	1.99848e-05	Other	Other
oe = 0.72	7	73739738	73741512	+	A830073O21Rik	0.61457	1.14329	0.000420532	Other	Other
12397598..12397606	8	12397098	12398106	-	Gm5607	-0.337595	1.14255	0.0334294	Other	Other
oe = 0.82	14	57035848	57037333	+	Gja3	-0.279605	1.14156	0.0151012	Other	Other
104465895..104465899	14	104465395	104466399	+	Pou4f1	-2.00356	1.1406	0.106265	Other	Other
90744775..90744780	Y	90744275	90745280	-	null	-0.640204	1.14039	0.654236	Other	Other
64501950..64501953	7	64501450	64502453	+	Apba2	0.407777	1.14025	0.00268824	Other	NonMES
3357632..3357635	12	3357132	3358135	-	null	-2.11686	1.13983	0.303887	Other	Other
oe = 0.70	6	97616368	97618261	+	Frmd4b	1.46794	1.13957	7.8319e-05	Other	Other
47015278..47015280	19	47014778	47015780	+	Nt5c2	1.08805	1.13911	2.09924e-05	Other	Other
oe = 0.86	14	57056958	57058746	+	Gja3	0.155054	1.13893	0.009397	Other	Other
45657722..45657725	14	45657222	45658225	+	Ddhd1	1.6997	1.13819	9.45601e-05	Other	Other
114562647..114562654	9	114562147	114563154	-	Trim71	0.356315	1.13787	0.00174736	Other	Other
87730516..87730516	9	87730016	87731016	+	Tbx18	0.0473984	1.1376	0.019904	Other	Other
70892820..70892821	8	70892320	70893321	-	Slc5a5	-0.167326	1.13748	0.0896009	Other	Other
oe = 0.83	4	129984173	129986939	+	Bai2	1.6232	1.13739	8.61207e-05	Other	Other
oe = 0.90	14	67007744	67009661	+	Bnip3l	2.14879	1.13697	9.35936e-05	Other	Other
oe = 0.66	10	34433936	34435967	+	null	-2.13873	1.13615	0.15848	Other	Other
97150590..97150592	11	97150090	97151092	+	Tbkbp1	1.26438	1.13597	0.000662352	Other	Other
45658099..45658102	14	45657599	45658602	+	Ddhd1	1.71201	1.13587	0.000184145	Other	Other
114563460..114563461	9	114562960	114563961	+	Trim71	0.750101	1.13562	0.000860782	Other	Other
oe = 0.83	14	62759406	62762302	+	Ints6	2.57568	1.13537	2.14276e-06	Other	Other
oe = 0.92	14	122406028	122407639	+	null	-0.352923	1.1343	0.0204953	Other	Other
oe = 0.89	2	97188086	97189585	+	Lrrc4c	-3.27133	1.1333	0.0889215	Other	Other
60378342..60378347	14	60377842	60378847	-	Fam123a	0.96666	1.13268	0.000973707	Other	Other
oe = 0.72	14	66868156	66869760	+	Dpysl2	2.1512	1.13262	1.29049e-05	Other	Other
30172803..30172804	15	30172303	30173304	+	Ctnnd2	1.14028	1.13156	0.000105596	Other	NonMES
12397264..12397270	8	12396764	12397770	+	Gm5607	-0.259283	1.13113	0.0690003	Other	Other
30801389..30801397	2	30800889	30801897	-	1700001O22Rik	-0.589575	1.13099	0.192451	Other	Other
64502107..64502110	7	64501607	64502610	-	Apba2	0.373371	1.13041	0.0019379	Other	NonMES
oe = 0.71	1	162338053	162339768	+	Dnm3	-2.00759	1.13026	0.292776	Other	Other
oe = 0.83	7	64501028	64503066	+	Apba2	0.918802	1.12999	0.000892124	Other	NonMES
12397622..12397628	8	12397122	12398128	-	Gm5607	-0.346215	1.12962	0.0321748	Other	Other
oe = 0.67	8	122869975	122871456	+	Gm20388	-0.760085	1.12887	0.0352798	Other	Other
oe = 0.72	18	35887274	35890554	+	null	2.37801	1.12876	3.15726e-05	Other	Other
12397255..12397257	8	12396755	12397757	-	Gm5607	-0.260905	1.1287	0.0689417	Other	Other
oe = 0.88	17	28075530	28076954	+	Tcp11	-1.11052	1.12842	0.152838	Other	Other
73326038..73326040	14	73325538	73326540	-	Rb1	0.931645	1.12827	0.000255234	Other	Other
oe = 0.65	14	52008618	52010156	+	Zfp219	0.891405	1.12809	0.00446874	Other	Other
oe = 1.73	19	39962246	39963728	+	null	-3.34344	1.12772	0.31899	Other	Other
oe = 0.66	7	62347754	62349244	+	Ndn	0.064243	1.1274	0.020846	Other	Other
94944531..94944535	10	94944031	94945035	+	Plxnc1	0.753416	1.12739	0.000450792	Other	Other
oe = 1.03	14	18145887	18147313	+	null	-2.06904	1.12723	0.123156	Other	Other
52260885..52260888	6	52260385	52261388	-	Hoxa13	-1.40366	1.1268	0.131422	Other	Other
oe = 0.89	2	87681358	87682797	+	null	-1.87698	1.12674	0.10683	Other	Other
oe = 0.80	1	77513850	77515953	+	Epha4	1.62225	1.1264	1.40573e-05	Other	Other
30172663..30172665	15	30172163	30173165	-	Ctnnd2	1.06056	1.12634	8.42305e-05	Other	NonMES
30172836..30172844	15	30172336	30173344	+	Ctnnd2	1.16479	1.12542	0.000127912	Other	NonMES
oe = 0.75	6	21213952	21216305	+	Kcnd2	1.31833	1.1253	0.00114382	Other	Other
42431751..42431760	19	42431251	42432260	-	Crtac1	-0.833366	1.12437	0.209105	Other	Other
114563090..114563091	9	114562590	114563591	-	Trim71	0.360421	1.12388	0.00207821	Other	Other
oe = 0.93	14	65805304	65806738	+	Pbk	0.526227	1.12386	0.00478406	Other	Other
70442956..70442962	14	70442456	70443462	+	Polr3d	1.37256	1.12346	0.000161708	Other	Other
45658146..45658149	14	45657646	45658649	-	Ddhd1	1.69044	1.1229	0.000161708	Other	Other
oe = 0.75	14	122524955	122526484	+	null	-2.09445	1.1221	0.0475612	Other	Other
22344758..22344764	5	22344258	22345264	+	Reln	0.201705	1.12194	0.00589723	Other	Other
oe = 0.94	7	25009603	25011345	+	Grik5	-0.0685087	1.12104	0.0158101	Other	Other
45657376..45657380	14	45656876	45657880	+	Ddhd1	1.34824	1.12067	3.15192e-05	Other	Other
oe = 0.90	14	74054728	74056240	+	null	-2.93207	1.1205	0.18245	Other	Other
73325743..73325750	14	73325243	73326250	-	Rb1	1.04469	1.12008	0.00015471	Other	Other
63245199..63245202	14	63244699	63245702	+	Gata4	-0.352118	1.12004	0.018608	Other	Other
12133508..12133512	X	12133008	12134012	-	Bcor	-1.70535	1.11891	0.209501	Other	Other
64501577..64501577	7	64501077	64502077	+	Apba2	0.2651	1.11807	0.00300504	Other	NonMES
87730526..87730527	9	87730026	87731027	+	Tbx18	0.0697841	1.11752	0.0219795	Other	Other
73326077..73326082	14	73325577	73326582	-	Rb1	0.902468	1.11714	0.000255104	Other	Other
83894424..83894431	17	83893924	83894931	-	null	-1.40846	1.11643	0.185877	Other	Other
oe = 0.80	14	121877812	121879663	+	Ubac2	1.89093	1.11589	2.4085e-05	Other	Other
64502142..64502148	7	64501642	64502648	-	Apba2	0.374258	1.11583	0.00287138	Other	NonMES
64502142..64502149	7	64501642	64502649	+	Apba2	0.374258	1.11583	0.00287138	Other	NonMES
78536915..78536919	14	78536415	78537419	-	Akap11	1.57992	1.1154	3.88523e-05	Other	Other
30172746..30172756	15	30172246	30173256	+	Ctnnd2	1.12658	1.11501	9.35936e-05	Other	NonMES
64502164..64502166	7	64501664	64502666	+	Apba2	0.373224	1.11428	0.00253558	Other	NonMES
12397424..12397427	8	12396924	12397927	+	Gm5607	-0.364079	1.11263	0.0419229	Other	Other
63606875..63606878	14	63606375	63607378	-	Gm15918	0.377387	1.11189	0.00173572	Other	Other
oe = 0.64	15	30753305	30755384	+	Ctnnd2	-1.51763	1.11168	0.0723614	Other	NonMES
73325843..73325855	14	73325343	73326355	+	Rb1	1.02561	1.11156	0.000279683	Other	Other
oe = 0.63	1	91343958	91346317	+	Espnl	0.722193	1.11015	0.0285381	Other	Other
oe = 0.62	1	33407028	33409180	+	null	-2.71611	1.10777	0.29026	Other	Other
oe = 0.68	3	44098881	44100631	+	null	-2.09495	1.10687	0.124601	Other	Other
oe = 0.60	X	142305014	142306459	+	Kcne1l	-1.15307	1.10584	0.0383523	Other	Other
94944584..94944589	10	94944084	94945089	+	Plxnc1	0.789816	1.10571	0.000357285	Other	Other
76556725..76556726	14	76556225	76557226	+	Serp2	0.340515	1.10559	0.00166732	Other	Other
64502196..64502204	7	64501696	64502704	+	Apba2	0.338461	1.10545	0.00206936	Other	NonMES
oe = 0.79	9	21311615	21313029	+	Ap1m2	-0.3866	1.10526	0.0247482	Other	Other
62760784..62760786	14	62760284	62761286	-	Ints6	1.84963	1.10515	6.12411e-06	Other	Other
122476119..122476122	14	122475619	122476622	-	Zic2	0.73145	1.10475	0.00050887	Other	Other
oe = 0.90	10	105572941	105574950	+	Tmtc2	1.96736	1.10337	3.15192e-05	Other	Other
oe = 0.62	3	65195074	65198020	+	Kcnab1	-1.95766	1.10331	0.209501	Other	Other
105574319..105574323	10	105573819	105574823	-	Tmtc2	1.61184	1.10321	3.19575e-05	Other	Other
114563434..114563438	9	114562934	114563938	+	Trim71	0.735591	1.10315	0.00102282	Other	Other
97188983..97188985	2	97188483	97189485	-	Lrrc4c	-3.48703	1.10307	0.0815367	Other	Other
79771310..79771313	14	79770810	79771813	-	Pcdh8	0.851238	1.10286	0.000497098	Other	Other
45351319..45351320	14	45350819	45351820	-	Styx	0.646041	1.10277	0.00289094	Other	Other
30172961..30172968	15	30172461	30173468	-	Ctnnd2	1.16223	1.10269	0.000309966	Other	NonMES
oe = 0.87	14	78535983	78537645	+	Akap11	1.77999	1.10228	6.85523e-05	Other	Other
oe = 0.82	15	93502710	93504163	+	Prickle1	-0.135494	1.10201	0.0689417	Other	Other
30172695..30172700	15	30172195	30173200	-	Ctnnd2	1.10066	1.10189	8.32938e-05	Other	NonMES
oe = 0.68	14	72531407	72533283	+	null	0.0869702	1.1015	0.022353	Other	Other
oe = 0.87	9	81613616	81615250	+	null	-1.74355	1.10131	0.163362	Other	Other
45657667..45657672	14	45657167	45658172	-	Ddhd1	1.68775	1.10075	0.00013585	Other	Other
125490796..125490797	4	125490296	125491297	+	Grik3	-0.463387	1.10001	0.216919	Other	Other
74668706..74668709	2	74668206	74669209	-	Hoxd13	-0.90625	1.09932	0.163334	Other	Other
61682750..61682753	14	61682250	61683253	+	null	1.74282	1.099	0.000126593	Other	Other
61682801..61682808	14	61682301	61683308	-	null	1.73443	1.09739	0.00015471	Other	Other
24955241..24955244	6	24954741	24955744	+	Tmem229a	1.24489	1.09737	0.000123387	Other	Other
25010225..25010227	7	25009725	25010727	+	Grik5	-0.725949	1.09643	0.0506083	Other	Other
30172679..30172693	15	30172179	30173193	+	Ctnnd2	1.09653	1.0957	0.000101366	Other	NonMES
30172925..30172931	15	30172425	30173431	-	Ctnnd2	1.18101	1.09488	0.000214022	Other	NonMES
oe = 0.74	14	49524976	49526444	+	Slc35f4	-0.362134	1.09482	0.0504609	Other	Other
105574256..105574258	10	105573756	105574758	+	Tmtc2	1.50404	1.0929	9.52854e-05	Other	Other
oe = 0.91	3	55787005	55788563	+	Nbea	-0.651018	1.0924	0.0463926	Other	Other
oe = 0.84	3	38124678	38126119	+	null	-2.23215	1.09198	0.161507	Other	Other
oe = 0.91	14	56810584	56813306	+	Zmym5	1.03179	1.0908	0.145371	Other	Other
102283303..102283305	12	102282803	102283805	-	Rin3	0.395469	1.09073	0.00397934	Other	Other
30173045..30173047	15	30172545	30173547	+	Ctnnd2	1.16582	1.09053	0.000199826	Other	NonMES
94944650..94944653	10	94944150	94945153	-	Plxnc1	0.805461	1.0898	0.00114544	Other	Other
30172716..30172723	15	30172216	30173223	+	Ctnnd2	1.13866	1.0894	8.15225e-05	Other	NonMES
oe = 0.78	4	125489451	125492412	+	Grik3	1.07386	1.08927	8.46166e-05	Other	Other
oe = 0.92	15	25780591	25782365	+	Myo10	0.00106287	1.08892	0.0060453	Other	Other
oe = 1.27	14	54296198	54298056	+	null	-3.11589	1.08838	0.0497258	Other	Other
oe = 0.68	12	16414414	16416153	+	null	-3.48603	1.08816	0.16123	Other	Other
oe = 0.80	19	5306253	5308315	+	Gal3st3	0.323228	1.08799	0.0134628	Other	Other
114562693..114562697	9	114562193	114563197	-	Trim71	0.413454	1.08738	0.0014643	Other	Other
52260969..52260975	6	52260469	52261475	+	Hoxa13	-1.43492	1.087	0.135333	Other	Other
oe = 0.67	14	122450209	122451822	+	Gm5089	0.935181	1.08662	0.00685629	Other	Other
94944651..94944657	10	94944151	94945157	+	Plxnc1	0.802758	1.08574	0.00116616	Other	Other
99657601..99657606	4	99657101	99658106	+	Foxd3	-1.28598	1.08508	0.133609	Other	Other
oe = 1.07	12	85407224	85408667	+	null	-1.71977	1.08479	0.123437	Other	Other
30172782..30172786	15	30172282	30173286	-	Ctnnd2	1.14883	1.08464	0.000119308	Other	NonMES
62332207..62332214	14	62331707	62332714	-	Rnaseh2b	1.16156	1.0836	0.000651609	Other	Other
94944643..94944645	10	94944143	94945145	+	Plxnc1	0.801282	1.08353	0.000758249	Other	Other
49788813..49788818	10	49788313	49789318	-	Grik2	0.228399	1.08318	0.0490022	Other	Other
oe = 0.81	15	26894405	26896271	+	Fbxl7	1.80397	1.08244	9.74663e-06	Other	Other
oe = 0.82	14	76503648	76505095	+	Tsc22d1	1.62519	1.08209	4.75145e-05	Other	Other
125490636..125490643	4	125490136	125491143	-	Grik3	-0.428254	1.08192	0.229081	Other	Other
oe = 1.02	14	73324670	73327076	+	Rb1	1.66558	1.08128	5.2482e-05	Other	Other
12397540..12397543	8	12397040	12398043	-	Gm5607	-0.379022	1.08041	0.0524143	Other	Other
88241303..88241306	3	88240803	88241806	+	Rhbg	0.151374	1.08019	0.0159934	Other	Other
oe = 0.80	5	69122616	69124985	+	Kctd8	-2.38066	1.0789	0.0437961	Other	Other
oe = 1.03	14	70288472	70290103	+	Ppp3cc	1.35226	1.07861	6.0836e-05	Other	Other
oe = 0.76	X	94773247	94774747	+	null	-1.84368	1.07848	0.198235	Other	Other
114562607..114562614	9	114562107	114563114	+	Trim71	0.300718	1.07619	0.00229427	Other	Other
73325766..73325766	14	73325266	73326266	+	Rb1	1.04011	1.07593	0.000179357	Other	Other
76090351..76090354	15	76089851	76090854	-	Nrbp2	-0.338872	1.07469	0.108892	Other	Other
oe = 0.71	8	124791793	124795428	+	Trim67	2.64168	1.07414	7.20864e-05	Other	Other
oe = 0.81	14	63605646	63607930	+	Gm15918	1.22237	1.07407	0.000122263	Other	Other
25010790..25010790	7	25010290	25011290	+	Grik5	-1.01241	1.07361	0.149912	Other	Other
94944711..94944711	10	94944211	94945211	+	Plxnc1	0.800417	1.07287	0.000877407	Other	Other
31939309..31939313	18	31938809	31939813	-	Lims2	-1.21802	1.07249	0.0497152	Other	Other
oe = 0.72	X	12132807	12134312	+	Bcor	-1.27704	1.07243	0.182015	Other	Other
oe = 0.64	6	108954138	108955807	+	null	-1.87158	1.07239	0.0709416	Other	Other
134343232..134343236	4	134342732	134343736	-	Slc30a2	-0.785226	1.07083	0.231194	Other	Other
125490689..125490697	4	125490189	125491197	+	Grik3	-0.459228	1.07035	0.23225	Other	Other
52260940..52260942	6	52260440	52261442	+	Hoxa13	-1.44693	1.06899	0.14974	Other	Other
28452049..28452053	7	28451549	28452553	-	Samd4b	-1.22279	1.06692	0.055475	Other	Other
oe = 1.54	5	6483620	6485063	+	null	-3.39507	1.06669	0.267954	Other	Other
94944670..94944677	10	94944170	94945177	+	Plxnc1	0.798507	1.06575	0.00130666	Other	Other
oe = 0.95	11	116759092	116760499	+	BC018473	-2.75176	1.06548	0.191188	Other	Other
49788830..49788833	10	49788330	49789333	-	Grik2	0.219788	1.06508	0.0528938	Other	Other
62332048..62332055	14	62331548	62332555	+	Rnaseh2b	1.11715	1.06479	0.00104683	Other	Other
oe = 0.66	17	81683474	81684995	+	null	-2.4815	1.06366	0.288465	Other	Other
73325775..73325781	14	73325275	73326281	+	Rb1	1.0318	1.06347	0.000244498	Other	Other
oe = 0.74	2	54084367	54086194	+	Rprm	1.54977	1.0626	0.000302528	Other	Other
57058134..57058139	14	57057634	57058639	-	Gja3	-0.438159	1.06217	0.0823948	Other	Other
oe = 0.88	4	154170137	154171698	+	Megf6	1.30179	1.06201	0.000751421	Other	Other
73325799..73325804	14	73325299	73326304	+	Rb1	1.03053	1.06156	0.000270642	Other	Other
73325717..73325728	14	73325217	73326228	-	Rb1	1.07824	1.06085	0.00024323	Other	Other
77514391..77514396	1	77513891	77514896	+	Epha4	0.696748	1.06053	0.000652382	Other	Other
oe = 0.82	9	33906891	33908539	+	null	-2.14857	1.059	0.199834	Other	Other
179443391..179443395	2	179442891	179443895	-	Cdh4	1.11811	1.05861	0.000966327	Other	Other
oe = 0.83	3	141210821	141212389	+	Pdha2	-0.148515	1.05833	0.0928242	Other	Other
oe = 0.91	5	136203842	136205343	+	null	-2.01395	1.05824	0.178905	Other	Other
oe = 0.68	14	47373219	47374702	+	Lgals3	-0.21664	1.05783	0.0264518	Other	Other
63860325..63860328	14	63859825	63860828	-	Pinx1	1.12901	1.0574	0.000106821	Other	Other
oe = 0.68	14	114667089	114669035	+	null	-3.06769	1.05686	0.281033	Other	Other
oe = 0.87	11	6064497	6066585	+	Camk2b	0.696795	1.05577	0.000626058	Other	Other
oe = 0.95	19	60347217	60348729	+	null	-2.18031	1.0557	0.292589	Other	Other
37241857..37241858	5	37241357	37242358	+	Crmp1	0.327074	1.05563	0.0154218	Other	Other
12397505..12397506	8	12397005	12398006	-	Gm5607	-0.307339	1.05486	0.0463963	Other	Other
oe = 0.65	X	77314802	77316593	+	null	-2.50147	1.05426	0.259617	Other	Other
97935417..97935425	5	97934917	97935925	+	Antxr2	-1.32048	1.0541	0.168214	Other	Other
87730663..87730669	9	87730163	87731169	-	Tbx18	0.0708782	1.05391	0.0453417	Other	Other
52260995..52261000	6	52260495	52261500	-	Hoxa13	-1.43378	1.05381	0.153375	Other	Other
oe = 0.89	14	45350518	45352231	+	Styx	0.950357	1.05306	0.000499657	Other	Other
oe = 0.64	10	99738959	99740879	+	null	-1.83528	1.05303	0.173857	Other	Other
oe = 0.87	7	109438270	109439863	+	Stk33	0.579738	1.05274	0.0354408	Other	Other
70289475..70289479	14	70288975	70289979	+	Ppp3cc	1.11801	1.05213	0.000383963	Other	Other
70289476..70289481	14	70288976	70289981	-	Ppp3cc	1.11801	1.05213	0.000383963	Other	Other
114562474..114562476	9	114561974	114562976	+	Trim71	0.215407	1.05174	0.00381999	Other	Other
70289494..70289498	14	70288994	70289998	-	Ppp3cc	1.1172	1.05092	0.000494888	Other	Other
oe = 0.87	14	47471966	47473677	+	Fbxo34	1.10704	1.05037	0.000600012	Other	Other
73325794..73325794	14	73325294	73326294	+	Rb1	1.02303	1.05031	0.000309966	Other	Other
oe = 0.72	8	92590994	92592460	+	null	-1.95569	1.05024	0.0889502	Other	Other
oe = 0.66	14	88612921	88614433	+	null	-2.61598	1.0502	0.221747	Other	Other
oe = 0.96	14	47297633	47299193	+	Mapk1ip1l	1.26659	1.04997	0.000453422	Other	Other
oe = 0.73	14	45019255	45020764	+	null	-2.45023	1.04955	0.106286	Other	Other
16061757..16061763	7	16061257	16062263	+	null	-1.24588	1.04868	0.177754	Other	Other
52260916..52260918	6	52260416	52261418	-	Hoxa13	-1.44358	1.04842	0.154928	Other	Other
oe = 0.86	2	47008358	47010421	+	null	-2.3236	1.04701	0.176616	Other	Other
52260183..52260185	6	52259683	52260685	+	Hoxa13	-0.928862	1.04678	0.132554	Other	Other
oe = 0.64	6	128685877	128688043	+	null	-2.65092	1.04659	0.231568	Other	Other
61682901..61682904	14	61682401	61683404	-	null	1.68715	1.04653	0.000312421	Other	Other
49788849..49788849	10	49788349	49789349	+	Grik2	0.207274	1.04631	0.0526694	Other	Other
oe = 0.79	1	146288088	146289563	+	null	-3.00619	1.04548	0.274676	Other	Other
66868837..66868843	14	66868337	66869343	-	Dpysl2	1.9444	1.04548	0.000113309	Other	Other
oe = 0.80	4	148129997	148131794	+	2610109H07Rik	0.967534	1.04497	0.000151141	Other	Other
34131510..34131513	13	34131010	34132013	+	Tubb2b	1.34614	1.04386	0.00119358	Other	NonMES
oe = 0.73	12	58769314	58770757	+	null	-2.58766	1.04285	0.216688	Other	Other
47298269..47298276	14	47297769	47298776	+	Mapk1ip1l	0.989468	1.04268	0.0027214	Other	Other
oe = 0.93	15	103606317	103607821	+	null	-2.29373	1.04257	0.415326	Other	Other
oe = 0.74	14	70074049	70080996	+	Egr3	2.73232	1.04257	5.44552e-06	Other	Other
106336686..106336687	8	106336186	106337187	-	Smpd3	-0.336854	1.0424	0.0425938	PN	Other
63255948..63255953	14	63255448	63256453	-	Gata4	-1.02869	1.04229	0.0196094	Other	Other
91364616..91364620	9	91364116	91365120	+	Zic1	0.17129	1.04224	0.101699	Other	Other
54618056..54618060	14	54617556	54618560	-	Psmb5	0.572107	1.04221	0.0422187	Other	Other
70289442..70289448	14	70288942	70289948	+	Ppp3cc	1.09512	1.04198	0.000489956	Other	Other
oe = 1.00	15	75211806	75213233	+	null	-2.57189	1.04176	0.265752	Other	Other
61046395..61046396	14	61045895	61046896	+	Tnfrsf19	0.924866	1.04092	0.00188256	Other	Other
38627220..38627225	1	38626720	38627725	-	Aff3	0.0921613	1.04078	0.0293275	Other	Other
oe = 0.97	1	125349389	125350816	+	null	-2.09329	1.04072	0.238352	Other	Other
114562517..114562520	9	114562017	114563020	+	Trim71	0.207947	1.04055	0.00376875	Other	Other
70289448..70289448	14	70288948	70289948	+	Ppp3cc	1.09331	1.03926	0.000514325	Other	Other
94944789..94944789	10	94944289	94945289	+	Plxnc1	0.781668	1.03916	0.000613145	Other	Other
oe = 0.82	11	69800378	69802134	+	Fgf11	0.882262	1.03851	0.000705674	Other	Other
70289337..70289340	14	70288837	70289840	+	Ppp3cc	1.11414	1.03757	0.000260661	Other	Other
70289250..70289253	14	70288750	70289753	-	Ppp3cc	1.05643	1.0373	0.000309966	Other	Other
66149064..66149067	14	66148564	66149567	+	Chrna2	-1.06062	1.03725	0.130792	Other	Other
104465929..104465935	14	104465429	104466435	-	Pou4f1	-2.07251	1.03717	0.274698	Other	Other
oe = 0.91	11	97149949	97152302	+	Tbkbp1	1.9539	1.03602	0.000101877	Other	Other
oe = 0.90	7	28451225	28452984	+	Samd4b	-0.335299	1.03581	0.0379748	Other	Other
oe = 0.64	1	114182334	114184455	+	null	-2.38896	1.03579	0.184619	Other	Other
56812098..56812102	14	56811598	56812602	+	Zmym5	-1.00735	1.03573	0.63295	Other	Other
66869123..66869125	14	66868623	66869625	-	Dpysl2	1.9292	1.03487	0.000100097	Other	Other
76415627..76415633	14	76415127	76416133	-	Tsc22d1	0.729891	1.03486	0.0029533	Other	Other
70289513..70289515	14	70289013	70290015	-	Ppp3cc	1.12362	1.03426	0.000660664	Other	Other
6065745..6065753	11	6065245	6066253	-	Camk2b	0.088117	1.03327	0.00369509	Other	Other
52260325..52260326	6	52259825	52260826	+	Hoxa13	-0.962715	1.03323	0.127232	Other	Other
oe = 0.88	14	104465290	104468737	+	Pou4f1	0.844839	1.03173	0.00846052	Other	Other
125490875..125490877	4	125490375	125491377	-	Grik3	-0.348182	1.0306	0.0823948	Other	Other
70289289..70289292	14	70288789	70289792	+	Ppp3cc	1.09482	1.0305	0.000323288	Other	Other
62761500..62761506	14	62761000	62762006	-	Ints6	2.03875	1.03026	2.51576e-05	Other	Other
oe = 0.66	4	122712207	122714161	+	null	-2.53691	1.03016	0.304228	Other	Other
154170735..154170736	4	154170235	154171236	+	Megf6	0.929733	1.02991	0.000546699	Other	Other
88454223..88454226	8	88453723	88454726	+	null	0.640832	1.02958	0.00575538	Other	Other
oe = 0.85	2	51885828	51887324	+	null	-2.99277	1.02814	0.262455	Other	Other
oe = 0.66	12	95248047	95249987	+	null	-2.02596	1.02722	0.0525441	Other	Other
79481175..79481181	14	79480675	79481681	+	Wbp4	1.88473	1.02711	0.000409068	Other	Other
76504453..76504460	14	76503953	76504960	-	Tsc22d1	1.36506	1.0259	0.000304499	Other	Other
15438776..15438781	14	15438276	15439281	-	Lrrc3b	0.0114224	1.02541	0.0164122	Other	Other
oe = 0.95	14	79480181	79482711	+	Wbp4	2.547	1.02505	2.53865e-05	Other	Other
88454210..88454218	8	88453710	88454718	-	null	0.636797	1.02353	0.00664701	Other	Other
79480850..79480854	14	79480350	79481354	+	Wbp4	1.57978	1.02348	0.00109005	Other	Other
16061854..16061856	7	16061354	16062356	-	null	-1.287	1.02336	0.180075	Other	Other
oe = 0.80	X	99819363	99822109	+	Tmem28	-0.413625	1.02244	0.0350876	Other	Other
98355433..98355439	13	98354933	98355939	-	Foxd1	-0.654371	1.02172	0.0861958	Other	Other
94944816..94944821	10	94944316	94945321	-	Plxnc1	0.781609	1.0217	0.00130292	Other	Other
70289531..70289535	14	70289031	70290035	+	Ppp3cc	1.1197	1.02165	0.000427436	Other	Other
66868790..66868796	14	66868290	66869296	+	Dpysl2	1.94372	1.02088	0.000105596	Other	Other
oe = 0.79	14	76110000	76111709	+	1200011I18Rik	1.60768	1.02087	9.37991e-05	Other	Other
57058163..57058164	14	57057663	57058664	-	Gja3	-0.465716	1.02084	0.0872419	Other	Other
79481061..79481062	14	79480561	79481562	-	Wbp4	1.72868	1.02037	0.000977636	Other	Other
125490722..125490726	4	125490222	125491226	-	Grik3	-0.451044	1.02009	0.258628	Other	Other
oe = 0.74	3	116760039	116761452	+	Agl	-2.26037	1.01981	0.260835	Other	Other
oe = 0.75	8	88453554	88455153	+	null	0.957782	1.01942	0.002268	Other	Other
oe = 0.87	8	47411903	47414426	+	Gm10083	1.77921	1.01935	9.04055e-05	Other	Other
oe = 1.10	5	78382576	78384044	+	null	-2.02935	1.01886	0.136276	Other	Other
63255957..63255961	14	63255457	63256461	+	Gata4	-1.01395	1.01871	0.0198529	Other	Other
70289355..70289362	14	70288855	70289862	+	Ppp3cc	1.11655	1.01782	0.000280331	Other	Other
118235345..118235347	14	118234845	118235847	-	Sox21	0.796569	1.01706	0.00102734	Other	Other
12397080..12397081	8	12396580	12397581	-	Gm5607	-0.413808	1.01688	0.141594	Other	Other
oe = 0.96	5	22343554	22345877	+	Reln	1.02797	1.01677	0.000684577	Other	Other
oe = 0.78	12	54067260	54069666	+	Npas3	0.409205	1.01661	0.0231551	Other	Other
62761348..62761353	14	62760848	62761853	+	Ints6	2.08685	1.01619	5.60367e-06	Other	Other
oe = 0.88	1	15742419	15744067	+	null	-3.41804	1.01582	0.339155	Other	Other
70289390..70289395	14	70288890	70289895	-	Ppp3cc	1.09588	1.01529	0.000309966	Other	Other
12397531..12397537	8	12397031	12398037	+	Gm5607	-0.357231	1.01504	0.0706061	Other	Other
oe = 0.67	15	64920236	64923185	+	Adcy8	1.4711	1.01479	0.00045831	Other	Other
87730385..87730387	9	87729885	87730887	+	Tbx18	0.00228808	1.01457	0.0447057	Other	Other
70289420..70289425	14	70288920	70289925	-	Ppp3cc	1.08998	1.01371	0.00035938	Other	Other
oe = 0.91	14	63177208	63178676	+	Fdft1	1.67435	1.0135	9.12046e-05	Other	Other
oe = 0.81	14	66296345	66298084	+	1700001G11Rik	1.82953	1.01319	1.15609e-05	Other	Other
oe = 0.61	15	52843914	52845830	+	null	-1.62003	1.01269	0.137935	Other	Other
134343202..134343207	4	134342702	134343707	+	Slc30a2	-0.838589	1.0125	0.261428	Other	Other
4801679..4801680	19	4801179	4802180	+	RP24-245M20.2	-0.900134	1.01216	0.210678	Other	Other
49783053..49783055	10	49782553	49783555	+	Grik2	0.232105	1.01176	0.0392067	Other	Other
oe = 0.88	14	57132410	57133956	+	Gjb6	-0.269121	1.01168	0.00695167	Other	Other
125490739..125490743	4	125490239	125491243	-	Grik3	-0.456839	1.0114	0.262372	Other	Other
57036569..57036570	14	57036069	57037070	-	Gja3	-0.822309	1.01073	0.139648	Other	Other
137723806..137723806	4	137723306	137724306	+	Rap1gap	-0.371654	1.01056	0.00767438	Other	Other
oe = 0.83	12	102282447	102283976	+	Rin3	0.741637	1.01053	0.00325663	Other	Other
6065505..6065508	11	6065005	6066008	+	Camk2b	0.0824667	1.00926	0.00575538	Other	Other
132880487..132880490	1	132879987	132880990	-	Lrrn2	1.04174	1.00892	0.00143091	Other	Other
oe = 0.87	12	3959402	3960950	+	Pomc	0.000348265	1.00872	0.0665524	Other	Other
104466467..104466472	14	104465967	104466972	+	Pou4f1	-1.34657	1.0085	0.0804148	Other	Other
oe = 0.96	3	45376199	45377817	+	Pcdh10	1.5507	1.00827	0.000336321	Other	Other
52208846..52208852	6	52208346	52209352	-	Gm20653	-0.537256	1.00799	0.0822302	Other	Other
88454162..88454169	8	88453662	88454669	+	null	0.582085	1.00789	0.00634709	Other	Other
125490728..125490730	4	125490228	125491230	+	Grik3	-0.459269	1.00775	0.263045	Other	Other
oe = 0.68	8	91422491	91424236	+	Fto	-1.57118	1.00771	0.179244	Other	Other
124354717..124354722	5	124354217	124355222	+	Cdk2ap1	-0.242161	1.00761	0.0409306	Other	Other
oe = 0.88	14	63542907	63544548	+	Mtmr9	1.0436	1.00733	7.30032e-05	Other	Other
136637730..136637737	4	136637230	136638237	-	Lactbl1	-1.058	1.00688	0.239209	Other	Other
oe = 0.70	15	34943546	34945079	+	Stk3	-2.32418	1.00674	0.287857	Other	Other
80757979..80757984	12	80757479	80758484	+	Gm1568	-1.13385	1.00628	0.239124	Other	Other
oe = 0.64	19	50426110	50427631	+	Sorcs1	-2.36709	1.00605	0.190904	Other	Other
oe = 0.98	14	51434419	51435952	+	Gm7247	-0.929236	1.00572	0.0583722	Other	Other
oe = 0.62	14	104710605	104712935	+	null	-2.36766	1.00512	0.248609	Other	Other
63606788..63606794	14	63606288	63607294	+	Gm15918	0.632472	1.00497	0.00369509	Other	Other
57133386..57133387	14	57132886	57133887	-	Gjb6	-0.631336	1.00483	0.0132021	Other	Other
oe = 0.90	12	86421160	86423402	+	Esrrb	1.01542	1.00471	0.00357186	Other	Other
62761419..62761422	14	62760919	62761922	+	Ints6	2.06128	1.00465	1.71854e-05	Other	Other
25165695..25165699	13	25165195	25166199	+	Dcdc2a	-1.66441	1.00457	0.363129	Other	Other
98792475..98792475	15	98791975	98792975	+	Wnt1	-0.108744	1.0043	0.00396277	Other	Other
70289551..70289554	14	70289051	70290054	-	Ppp3cc	1.10367	1.00401	0.000474074	Other	Other
76504508..76504512	14	76504008	76505012	+	Tsc22d1	1.35912	1.00393	0.000244498	Other	Other
77514419..77514422	1	77513919	77514922	+	Epha4	0.704178	1.00323	0.00190888	Other	Other
18587194..18587199	16	18586694	18587699	-	Tbx1	-0.771468	1.00307	0.243516	Other	Other
oe = 0.92	1	55361982	55364157	+	Boll	-0.248547	1.0028	0.311379	Other	Other
oe = 0.84	14	61438809	61440856	+	Kpna3	2.08911	1.00266	0.000113459	Other	Other
114786454..114786458	11	114785954	114786958	+	Kif19a	-1.14439	1.00252	0.288578	Other	Other
61439359..61439367	14	61438859	61439867	+	Kpna3	1.30266	1.00248	0.000407962	Other	Other
oe = 0.87	11	103809321	103810978	+	Wnt3	0.499944	1.00236	0.0312124	Other	Other
73325604..73325607	14	73325104	73326107	-	Rb1	1.00457	1.00234	0.000336285	Other	Other
148130920..148130922	4	148130420	148131422	+	2610109H07Rik	0.468596	1.00231	0.00987362	Other	Other
oe = 0.68	X	80207663	80209402	+	null	-3.0355	1.00152	0.256743	Other	Other
6065678..6065687	11	6065178	6066187	-	Camk2b	0.123565	1.0007	0.00489605	Other	Other
65806024..65806026	14	65805524	65806526	+	Pbk	0.225032	1.00033	0.0292829	Other	Other
79481448..79481455	14	79480948	79481955	+	Wbp4	2.02159	1.0003	0.000259664	Other	Other
67008480..67008481	14	67007980	67008981	-	Bnip3l	1.75068	0.999545	0.000867234	Other	Other
165211158..165211160	2	165210658	165211660	+	Cdh22	-0.726618	0.99931	0.156575	Other	Other
61439895..61439901	14	61439395	61440401	-	Kpna3	1.81796	0.99906	0.000338978	Other	Other
6065666..6065678	11	6065166	6066178	+	Camk2b	0.122195	0.99865	0.00506037	Other	Other
79481454..79481458	14	79480954	79481958	-	Wbp4	2.02026	0.998319	0.000255193	Other	Other
154170710..154170714	4	154170210	154171214	+	Megf6	0.927167	0.998292	0.000429618	Other	Other
73325666..73325670	14	73325166	73326170	+	Rb1	1.06065	0.997634	0.000383841	Other	Other
118132774..118132779	14	118132274	118133279	-	Tgds	1.04799	0.997319	0.00185384	Other	Other
31939339..31939343	18	31938839	31939843	-	Lims2	-1.17836	0.99599	0.0714022	Other	Other
3414472..3414474	19	3413972	3414974	-	Gal	-0.631844	0.995731	0.0436384	Other	Other
28451819..28451823	7	28451319	28452323	+	Samd4b	-0.983134	0.995527	0.136627	Other	Other
46883548..46883552	14	46883048	46884052	-	Samd4	1.06013	0.99487	0.000312421	Other	Other
79481011..79481012	14	79480511	79481512	-	Wbp4	1.68052	0.994832	0.000756265	Other	Other
65358268..65358272	14	65357768	65358772	+	Zfp395	0.989583	0.992712	0.000947981	Other	Other
132880452..132880454	1	132879952	132880954	-	Lrrn2	1.02334	0.992565	0.00132844	Other	Other
61648124..61648127	14	61647624	61648627	+	null	0.904385	0.991997	0.00485549	Other	Other
73325599..73325604	14	73325099	73326104	+	Rb1	0.99738	0.991566	0.000429618	Other	Other
oe = 0.66	7	115817252	115819401	+	Sox6	-2.10473	0.991177	0.278083	Other	Other
16811013..16811014	7	16810513	16811514	+	Fkrp	-0.443392	0.990785	0.113656	Other	Other
16811014..16811018	7	16810514	16811518	-	Fkrp	-0.443392	0.990785	0.113656	Other	Other
oe = 0.87	11	107793066	107795419	+	Cacng4	1.13868	0.989776	0.000336321	Other	Other
61648153..61648159	14	61647653	61648659	-	null	0.931418	0.989668	0.00340434	Other	Other
oe = 0.68	3	66231975	66233717	+	Veph1	-1.68479	0.988697	0.145371	Other	Other
54606077..54606080	14	54605577	54606580	-	4931414P19Rik	-0.217609	0.98867	0.0394053	Other	Other
oe = 0.78	1	184154038	184155750	+	null	-1.80866	0.988315	0.125822	Other	Other
102283182..102283184	12	102282682	102283684	+	Rin3	0.399647	0.988273	0.00428603	Other	Other
102283187..102283189	12	102282687	102283689	+	Rin3	0.399647	0.988273	0.00428603	Other	Other
61439385..61439389	14	61438885	61439889	+	Kpna3	1.36338	0.987477	0.000450792	Other	Other
38627237..38627246	1	38626737	38627746	-	Aff3	0.0810017	0.98733	0.0555211	Other	Other
65358500..65358502	14	65358000	65359002	+	Zfp395	1.15447	0.986813	0.00102932	Other	Other
oe = 0.86	14	47275932	47277833	+	Wdhd1	1.65025	0.986786	0.000481502	Other	Other
99590795..99590798	15	99590295	99591298	+	Aqp5	-0.815054	0.986739	0.245568	Other	Other
88454406..88454406	8	88453906	88454906	+	null	0.59809	0.98535	0.00736776	Other	Other
98355580..98355589	13	98355080	98356089	-	Foxd1	-0.621588	0.985186	0.0926208	Other	Other
95528152..95528152	15	95527652	95528652	+	Nell2	0.389602	0.985035	0.0280572	Other	Other
oe = 0.77	2	110156709	110158186	+	Ccdc34	-1.75907	0.985026	0.0472114	Other	Other
118235203..118235205	14	118234703	118235705	-	Sox21	0.77308	0.984721	0.00248532	Other	Other
87730906..87730908	9	87730406	87731408	+	Tbx18	0.121437	0.984656	0.0449609	Other	Other
6065732..6065739	11	6065232	6066239	+	Camk2b	0.0880492	0.984141	0.00540761	Other	Other
45351166..45351171	14	45350666	45351671	-	Styx	0.720253	0.983	0.00124637	Other	Other
67008847..67008849	14	67008347	67009349	-	Bnip3l	1.80491	0.982737	0.000239584	Other	Other
61439487..61439487	14	61438987	61439987	+	Kpna3	1.58535	0.982552	0.000849712	Other	Other
148130762..148130766	4	148130262	148131266	+	2610109H07Rik	0.515454	0.981812	0.0101762	Other	Other
70289210..70289215	14	70288710	70289715	+	Ppp3cc	1.04275	0.981348	0.000340145	Other	Other
52316813..52316818	6	52316313	52317318	-	Evx1	-0.78409	0.980647	0.0632668	Other	Other
oe = 0.88	3	131105588	131107291	+	null	0.522741	0.980374	0.0136584	Other	Other
oe = 0.70	6	42122366	42124493	+	null	-3.48093	0.978969	0.318907	Other	Other
99590759..99590759	15	99590259	99591259	+	Aqp5	-0.84917	0.978633	0.261132	Other	Other
124793240..124793240	8	124792740	124793740	+	Trim67	1.83972	0.978303	3.54002e-05	Other	Other
67455447..67455449	11	67454947	67455949	+	Gas7	0.95886	0.977854	0.0019309	Other	Other
oe = 0.65	17	27113028	27114461	+	Itpr3	0.0456892	0.977456	0.0350883	Other	Other
oe = 0.77	15	79828105	79829521	+	Nptxr	0.23779	0.976978	0.00958007	Other	Other
98792515..98792519	15	98792015	98793019	+	Wnt1	-0.122454	0.976861	0.00477748	Other	Other
47472787..47472793	14	47472287	47473293	+	Fbxo34	0.894874	0.97682	0.00120157	Other	Other
15438840..15438845	14	15438340	15439345	-	Lrrc3b	-0.00503023	0.975368	0.0286073	Other	Other
oe = 0.75	10	110846502	110848332	+	null	-2.37902	0.975151	0.237452	Other	Other
oe = 0.79	2	25185225	25186730	+	Nrarp	1.21917	0.974688	0.000107212	Other	Other
oe = 0.62	12	84569368	84570836	+	Vsx2	-0.176015	0.974336	0.0411773	Other	Other
88454269..88454276	8	88453769	88454776	-	null	0.622941	0.973772	0.00774217	Other	Other
oe = 0.78	12	111273594	111276408	+	Amn	1.18657	0.973763	0.000659841	Other	Other
oe = 0.77	9	87728986	87731549	+	Tbx18	1.04354	0.973397	0.012393	Other	Other
oe = 0.84	11	67454458	67456472	+	Gas7	1.36596	0.972554	0.00117181	Other	Other
70289040..70289045	14	70288540	70289545	+	Ppp3cc	0.944265	0.972198	0.000277621	Other	Other
88454269..88454270	8	88453769	88454770	+	null	0.621776	0.972024	0.00776206	Other	Other
98355465..98355469	13	98354965	98355969	-	Foxd1	-0.655374	0.971726	0.102677	Other	Other
oe = 0.70	14	60634106	60635716	+	Spata13	1.38798	0.971369	0.00222544	Other	Other
63177945..63177948	14	63177445	63178448	-	Fdft1	1.54006	0.970723	0.000210607	Other	Other
oe = 0.84	9	36658220	36660356	+	null	-2.30917	0.970558	0.129898	Other	Other
oe = 0.92	14	57103389	57105371	+	Gjb2	0.395928	0.969695	0.00664561	Other	Other
oe = 0.70	12	61762288	61763821	+	Lrfn5	-2.637	0.96943	0.35883	Other	Other
6065772..6065776	11	6065272	6066276	+	Camk2b	0.032941	0.969424	0.00599531	Other	Other
oe = 0.80	8	70111389	70113425	+	Ncan	0.530021	0.969118	0.00839486	Other	NonMES
oe = 0.70	1	114807958	114809879	+	null	-2.39026	0.96889	0.210242	Other	Other
101859962..101859968	15	101859462	101860468	+	Krt77	-0.507602	0.968757	0.126311	Other	Other
80758144..80758145	12	80757644	80758645	-	Gm1568	-1.22561	0.968507	0.166209	Other	Other
70289153..70289160	14	70288653	70289660	-	Ppp3cc	1.05943	0.967944	0.000241461	Other	Other
oe = 0.68	10	60185308	60187148	+	Chst3	0.351676	0.967414	0.0778703	Other	Other
oe = 0.70	6	10690112	10691615	+	null	-3.65536	0.967403	0.213525	Other	Other
52014562..52014567	14	52014062	52015067	-	Zfp219	0.183807	0.9674	0.00457135	Other	Other
99468845..99468848	7	99468345	99469348	-	Klhl35	-1.35553	0.967191	0.181136	Other	Other
118235214..118235222	14	118234714	118235722	+	Sox21	0.787159	0.967089	0.00170264	Other	Other
oe = 0.85	15	80210859	80212456	+	Mgat3	0.202335	0.966784	0.00690024	Other	Other
oe = 0.87	14	70152677	70154377	+	2610301G19Rik	1.46719	0.966628	0.000161708	Other	Other
69805495..69805495	14	69804995	69805995	+	Rhobtb2	1.27314	0.966622	0.000991925	Other	Other
146724982..146724990	1	146724482	146725490	-	Fam5c	-1.74286	0.966212	0.0848804	Other	Other
oe = 1.04	14	48120265	48122224	+	Peli2	1.3798	0.966024	0.000264081	Other	Other
oe = 0.71	5	70761068	70763014	+	Gabrg1	-2.41028	0.965463	0.306639	Other	Other
118235239..118235243	14	118234739	118235743	+	Sox21	0.781662	0.965261	0.00198801	Other	Other
125490014..125490017	4	125489514	125490517	+	Grik3	-0.323392	0.96456	0.0290623	Other	Other
125490021..125490022	4	125489521	125490522	-	Grik3	-0.323392	0.96456	0.0290623	Other	Other
38373993..38373996	15	38373493	38374496	+	null	-0.171094	0.964426	0.0448426	Other	Other
6065715..6065723	11	6065215	6066223	-	Camk2b	0.0863759	0.963975	0.00711631	Other	Other
oe = 0.83	3	140770877	140774397	+	null	-2.16504	0.963802	0.300829	Other	Other
38627157..38627159	1	38626657	38627659	+	Aff3	0.0947491	0.963701	0.038626	Other	Other
oe = 0.75	16	91224821	91228142	+	Olig2	2.39546	0.962755	4.7869e-05	Other	NonMES
60634714..60634716	14	60634214	60635216	-	Spata13	1.13789	0.962522	0.00299273	Other	Other
8801987..8801988	17	8801487	8802488	-	Pde10a	1.40425	0.962521	0.000640263	Other	Other
65805968..65805969	14	65805468	65806469	-	Pbk	0.205241	0.962359	0.0312315	Other	Other
oe = 0.86	3	125075371	125076811	+	null	-2.32126	0.96207	0.282877	Other	Other
107529801..107529805	6	107529301	107530305	+	Lrrn1	0.0596446	0.961865	0.0431983	Other	Other
oe = 0.75	15	75731105	75732511	+	null	0.330761	0.961462	0.0566425	Other	Other
179177333..179177339	2	179176833	179177839	-	null	-1.75406	0.961071	0.204924	Other	Other
124793497..124793500	8	124792997	124794000	+	Trim67	1.72839	0.960491	2.67642e-05	Other	Other
69881665..69881668	8	69881165	69882168	-	Cilp2	-0.545369	0.959754	0.0343033	Other	Other
oe = 0.86	14	63255183	63256625	+	Gata4	-0.669909	0.959297	0.021819	Other	Other
102283123..102283124	12	102282623	102283624	+	Rin3	0.400376	0.958884	0.00558081	Other	Other
115040528..115040528	14	115040028	115041028	+	Mir17hg	0.817737	0.958815	0.00321349	Other	Other
67455388..67455389	11	67454888	67455889	-	Gas7	0.931644	0.958761	0.00141559	Other	Other
73325402..73325402	14	73324902	73325902	+	Rb1	0.898807	0.955829	0.000860877	Other	Other
84069706..84069711	12	84069206	84070211	-	Acot5	-0.83942	0.9556	0.0573688	Other	Other
89830997..89831000	3	89830497	89831500	+	She	-0.686909	0.955157	0.081878	Other	Other
oe = 1.03	X	9641607	9643049	+	null	-3.35977	0.954964	0.160418	Other	Other
95528297..95528303	15	95527797	95528803	-	Nell2	0.332116	0.954535	0.0284377	Other	Other
oe = 0.72	15	102966002	102968162	+	Hoxc10	0.440251	0.954512	0.14393	Other	Other
oe = 0.79	4	66403154	66405132	+	Astn2	1.35416	0.954223	0.00262115	Other	Other
132880411..132880411	1	132879911	132880911	+	Lrrn2	0.974017	0.953339	0.00196243	Other	Other
115040592..115040596	14	115040092	115041096	+	Mir17hg	0.814158	0.952286	0.00340434	Other	Other
137322954..137322954	7	137322454	137323454	+	null	-0.842564	0.95193	0.0741805	Other	Other
oe = 0.64	11	45724047	45726588	+	null	-2.5286	0.951889	0.113656	Other	Other
oe = 0.92	3	151623414	151625062	+	null	-2.99088	0.949946	0.416052	Other	Other
oe = 0.80	10	127078813	127080875	+	Agap2	0.994908	0.94983	0.0417413	Other	Other
oe = 1.03	2	30218000	30219442	+	null	-2.33757	0.948585	0.279679	Other	Other
oe = 0.64	9	95291578	95293915	+	null	-2.14625	0.947937	0.214485	Other	Other
oe = 0.90	3	21191421	21193062	+	null	-2.43395	0.947828	0.211061	Other	Other
86220822..86220827	12	86220322	86221327	+	null	-0.291047	0.947759	0.0322977	Other	Other
oe = 0.87	14	70765412	70767502	+	Xpo7	1.61165	0.947501	3.49912e-05	Other	Other
oe = 0.88	12	92171201	92173265	+	null	-2.07559	0.947266	0.250837	Other	Other
95528188..95528193	15	95527688	95528693	+	Nell2	0.364032	0.946681	0.029702	Other	Other
oe = 0.88	16	47912435	47913945	+	null	-3.58042	0.946569	0.287182	Other	Other
oe = 0.67	2	104014909	104016651	+	4931422A03Rik	-1.47255	0.946511	0.125637	Other	Other
oe = 0.83	14	118136198	118138059	+	Gpr180	2.01732	0.945126	0.000190791	Other	Other
oe = 0.86	14	47648663	47650663	+	null	1.60108	0.945013	0.0026282	Other	Other
102283098..102283101	12	102282598	102283601	-	Rin3	0.391103	0.944975	0.00533109	Other	Other
oe = 0.63	15	98789083	98790658	+	Wnt1	0.760517	0.944905	0.00802282	Other	Other
137322842..137322843	7	137322342	137323343	-	null	-0.780178	0.944396	0.0904197	Other	Other
oe = 0.84	14	100654522	100656403	+	null	-2.98309	0.943951	0.180618	Other	Other
79481503..79481508	14	79481003	79482008	+	Wbp4	2.03736	0.943589	0.000409139	Other	Other
81706689..81706692	7	81706189	81707192	+	Homer2	0.170779	0.943329	0.00978462	Other	Other
oe = 1.69	8	113574800	113576282	+	null	-3.39161	0.943239	0.267922	Other	Other
oe = 0.75	9	107935270	107936740	+	Camkv	0.396061	0.943052	0.00431409	Other	Other
17837187..17837189	19	17836687	17837689	-	Pcsk5	0.875279	0.942847	0.00492785	Other	Other
65358707..65358709	14	65358207	65359209	-	Zfp395	1.14176	0.942282	0.00130666	Other	Other
oe = 1.01	14	61647386	61649887	+	null	1.77643	0.94185	0.000496292	Other	Other
67455509..67455511	11	67455009	67456011	+	Gas7	0.924904	0.941781	0.00335338	Other	Other
18859919..18859919	6	18859419	18860419	+	null	-1.31187	0.941041	0.178905	Other	Other
87730191..87730206	9	87729691	87730706	-	Tbx18	-0.0468669	0.940947	0.0999248	Other	Other
37242376..37242379	5	37241876	37242879	-	Crmp1	0.147205	0.940739	0.034312	Other	Other
oe = 0.70	5	121838042	121839605	+	Sh2b3	0.387272	0.940426	0.0377601	Other	Other
oe = 0.89	12	15191109	15193037	+	null	-2.60794	0.940296	0.384435	Other	Other
oe = 0.62	5	36237296	36240435	+	Sorcs2	-2.18122	0.939529	0.1272	Other	Other
oe = 0.79	17	8800258	8802926	+	Pde10a	2.41746	0.939501	5.22198e-05	Other	Other
oe = 0.84	15	98791172	98793431	+	Wnt1	0.969698	0.938727	0.000674504	Other	Other
80287582..80287593	15	80287082	80288093	-	Cacna1i	-0.940976	0.938505	0.0855189	Other	Other
oe = 0.66	2	130361348	130362962	+	Ebf4	0.0169952	0.93842	0.102679	Other	Other
50678753..50678758	19	50678253	50679258	+	Sorcs1	0.28502	0.938075	0.00784078	Other	Other
12133538..12133541	X	12133038	12134041	-	Bcor	-1.66105	0.937778	0.270823	Other	Other
oe = 0.80	19	17836304	17838181	+	Pcsk5	1.29939	0.937775	0.00182045	Other	Other
99820911..99820912	X	99820411	99821412	-	Tmem28	-1.9779	0.937542	0.337355	Other	Other
98355520..98355522	13	98355020	98356022	+	Foxd1	-0.630415	0.936703	0.114541	Other	Other
12478135..12478140	8	12477635	12478640	-	null	-0.295961	0.93662	0.0377509	Other	Other
122049461..122049463	5	122048961	122049963	+	Cux2	0.248888	0.936537	0.00272878	Other	Other
107794671..107794681	11	107794171	107795181	+	Cacng4	0.0897771	0.936109	0.0488665	Other	Other
73325378..73325380	14	73324878	73325880	-	Rb1	0.878197	0.935113	0.000867973	Other	Other
84876492..84876494	12	84875992	84876994	-	Ltbp2	0.175137	0.935029	0.0162598	Other	Other
oe = 0.71	16	72662580	72664298	+	Robo1	1.29907	0.934735	0.000185443	Other	Other
69805446..69805454	14	69804946	69805954	-	Rhobtb2	1.28785	0.934678	0.00121397	Other	Other
137322632..137322638	7	137322132	137323138	+	null	-0.6793	0.934444	0.0342762	Other	Other
oe = 0.69	7	52794191	52795599	+	null	-1.6211	0.933949	0.0663606	Other	Other
oe = 0.68	8	105211866	105213328	+	Cbfb	-1.20063	0.933788	0.0970649	Other	Other
50678807..50678810	19	50678307	50679310	-	Sorcs1	0.209598	0.932878	0.0140831	Other	Other
oe = 1.03	14	68682103	68683530	+	null	-2.35501	0.932846	0.252568	Other	Other
oe = 0.84	12	67949864	67951512	+	null	-1.75579	0.93222	0.300938	Other	Other
45220111..45220118	14	45219611	45220618	-	Txndc16	1.78062	0.931389	5.16887e-05	Other	Other
oe = 0.69	14	63240096	63241625	+	Gata4	-0.393156	0.931339	0.0348702	Other	Other
99380760..99380769	15	99380260	99381269	+	null	-1.36538	0.931331	0.133366	Other	Other
oe = 0.70	13	15251398	15252861	+	null	-3.48087	0.931225	0.285368	Other	Other
oe = 0.79	14	45218819	45220990	+	Txndc16	2.39248	0.931076	3.7507e-05	Other	Other
118136985..118136987	14	118136485	118137487	+	Gpr180	1.76812	0.930393	0.000230401	Other	Other
89931134..89931136	1	89930634	89931636	-	Gbx2	0.518169	0.930035	0.0029429	Other	Other
oe = 0.73	12	80756915	80759925	+	Gm1568	0.831994	0.929649	0.0414752	Other	Other
oe = 0.70	12	101446518	101448030	+	Catsperb	-2.29261	0.92959	0.172214	Other	Other
65358899..65358904	14	65358399	65359404	-	Zfp395	1.07586	0.92891	0.0024006	Other	Other
122049430..122049432	5	122048930	122049932	+	Cux2	0.19963	0.927983	0.00292379	Other	Other
60210638..60210639	11	60210138	60211139	+	Srebf1	1.11838	0.927261	0.00270505	Other	Other
oe = 0.94	14	80735944	80737346	+	null	-3.0638	0.927092	0.36052	Other	Other
38627180..38627184	1	38626680	38627684	+	Aff3	0.136007	0.92708	0.044465	Other	Other
47649242..47649248	14	47648742	47649748	+	null	1.16842	0.927064	0.00295844	Other	Other
66286188..66286192	15	66285688	66286692	-	Kcnq3	-0.13005	0.926979	0.064133	Other	Other
61665886..61665893	13	61665386	61666393	+	null	-2.35793	0.926905	0.339131	Other	Other
oe = 0.71	11	103773043	103774922	+	Wnt3	0.260675	0.926622	0.0319055	Other	Other
oe = 0.69	15	37134978	37136521	+	null	-0.0480629	0.926423	0.0274891	Other	Other
69805354..69805364	14	69804854	69805864	+	Rhobtb2	1.28745	0.926351	0.00134988	Other	Other
oe = 0.82	14	73384291	73385868	+	Itm2b	1.31874	0.925832	0.00101566	Other	Other
oe = 0.90	8	69880410	69883846	+	Cilp2	1.01243	0.925691	0.00422115	Other	Other
83632183..83632187	17	83631683	83632687	-	Kcng3	-0.0580087	0.925459	0.0151161	Other	Other
19179352..19179353	7	19178852	19179853	+	Eml2	-0.737522	0.925424	0.0347337	Other	Other
oe = 0.80	15	76910608	76912379	+	Zfp647	0.363476	0.92541	0.0226524	Other	Other
oe = 0.83	14	64440040	64441517	+	Msra	1.66558	0.925324	0.000141851	Other	Other
oe = 0.83	3	6799647	6801099	+	null	-1.35495	0.925207	0.388665	Other	Other
oe = 0.66	12	26047849	26050217	+	null	-1.63642	0.925062	0.17506	Other	Other
oe = 0.75	6	137251835	137253399	+	Ptpro	1.21481	0.925047	0.000556527	Other	Other
6065778..6065784	11	6065278	6066284	-	Camk2b	0.0478031	0.924838	0.00537111	Other	Other
oe = 0.68	15	33744565	33746325	+	null	-2.5585	0.924386	0.395543	Other	Other
oe = 0.88	14	77155793	77158337	+	Enox1	2.06569	0.924371	0.000154918	Other	Other
107794769..107794774	11	107794269	107795274	-	Cacng4	0.111847	0.924294	0.029464	Other	Other
oe = 0.86	14	79389728	79391431	+	Naa16	1.93816	0.924185	5.44552e-06	Other	Other
69805424..69805428	14	69804924	69805928	-	Rhobtb2	1.30237	0.924146	0.00135453	Other	Other
75845540..75845542	14	75845040	75846042	-	Tpt1	1.99217	0.923872	2.30018e-05	Other	Other
oe = 0.61	8	82818234	82819783	+	null	-1.88276	0.923598	0.199178	Other	Other
oe = 0.68	3	120824838	120826792	+	null	-1.92545	0.923474	0.153581	Other	Other
oe = 0.78	8	12429961	12431850	+	Gm5607	0.845154	0.923335	0.0034191	Other	Other
132880379..132880388	1	132879879	132880888	+	Lrrn2	0.962441	0.923233	0.00351848	Other	Other
54605953..54605958	14	54605453	54606458	+	4931414P19Rik	-0.190832	0.92311	0.0596706	Other	Other
16061704..16061706	7	16061204	16062206	-	null	-1.32962	0.923066	0.241239	Other	Other
16061714..16061720	7	16061214	16062220	+	null	-1.32962	0.923066	0.241239	Other	Other
oe = 0.66	14	106963463	106965603	+	null	-2.75328	0.922792	0.276506	Other	Other
oe = 0.80	14	123879455	123881311	+	Itgbl1	-2.63567	0.922734	0.231032	Other	Other
69805461..69805464	14	69804961	69805964	+	Rhobtb2	1.27678	0.922654	0.00177412	Other	Other
79481973..79481976	14	79481473	79482476	-	Elf1	1.78604	0.922381	0.000147241	Other	Other
oe = 0.83	15	91990461	91994469	+	null	-3.16944	0.922348	0.315811	Other	Other
oe = 0.82	16	5884351	5886225	+	null	0.317845	0.921727	0.00912887	Other	Other
oe = 0.76	14	69174141	69175655	+	Nkx2-6	-0.878609	0.921497	0.22694	Other	Other
6065415..6065417	11	6064915	6065917	-	Camk2b	0.047525	0.921025	0.00931688	Other	Other
oe = 0.80	19	45301022	45302713	+	null	0.66155	0.921012	0.00174409	Other	Other
107935954..107935957	9	107935454	107936457	-	Camkv	0.0318739	0.920628	0.0154386	Other	Other
oe = 0.65	14	72056609	72058085	+	null	-2.84398	0.920584	0.0832478	Other	Other
6065647..6065650	11	6065147	6066150	+	Camk2b	0.135222	0.919755	0.00575872	Other	Other
107794697..107794698	11	107794197	107795198	+	Cacng4	0.078705	0.919726	0.0350091	Other	Other
54807036..54807039	11	54806536	54807539	+	null	-1.07685	0.919385	0.271282	Other	Other
73325363..73325365	14	73324863	73325865	+	Rb1	0.857841	0.919372	0.000788953	Other	Other
oe = 0.82	14	54360297	54361928	+	Oxa1l	1.27907	0.919321	0.000327669	Other	Other
oe = 0.88	X	65539481	65541129	+	null	-2.70623	0.91901	0.060501	Other	Other
oe = 0.90	14	75753538	75755140	+	Cog3	1.40459	0.918983	0.00366115	Other	Other
oe = 0.78	15	9991421	9992887	+	null	-1.90649	0.918981	0.21717	Other	Other
98355324..98355326	13	98354824	98355826	+	Foxd1	-0.623508	0.918954	0.0455384	Other	Other
120598738..120598738	8	120598238	120599238	+	Gm20388	-0.24116	0.918809	0.0558882	Other	Other
oe = 0.75	14	46881485	46885669	+	Samd4	2.54209	0.918698	1.25453e-05	Other	Other
71215757..71215767	9	71215257	71216267	-	Aldh1a2	-0.791735	0.917939	0.106779	Other	Other
16061678..16061681	7	16061178	16062181	+	null	-1.35452	0.916703	0.248708	Other	Other
oe = 0.68	6	107529062	107530711	+	Lrrn1	0.426332	0.916358	0.0339009	Other	Other
47413551..47413553	8	47413051	47414053	-	Gm10083	1.28286	0.916279	0.00130829	Other	Other
54605982..54605984	14	54605482	54606484	+	4931414P19Rik	-0.201715	0.916158	0.0621539	Other	Other
6065802..6065809	11	6065302	6066309	-	Camk2b	0.0420165	0.916158	0.00644564	Other	Other
113195306..113195310	6	113194806	113195810	+	Lhfpl4	0.22534	0.915422	0.0167023	Other	Other
83894373..83894380	17	83893873	83894880	+	null	-1.57357	0.913405	0.30575	Other	Other
oe = 0.73	2	172938430	172941265	+	Bmp7	2.1179	0.912915	0.000214364	Other	Other
52014545..52014550	14	52014045	52015050	-	Zfp219	0.184435	0.912859	0.00485984	Other	Other
45529634..45529638	14	45529134	45530138	+	Fermt2	0.863652	0.912698	0.00222544	Other	Other
oe = 0.88	7	79499324	79500781	+	null	0.55107	0.912679	0.00918008	Other	Other
60210551..60210552	11	60210051	60211052	+	Srebf1	1.13367	0.91257	0.00249935	Other	Other
99380810..99380815	15	99380310	99381315	-	null	-1.31585	0.912371	0.142274	Other	Other
5307491..5307508	19	5306991	5308008	+	Gal3st3	-0.556944	0.911683	0.0449074	Other	Other
6065841..6065851	11	6065341	6066351	-	Camk2b	0.00210712	0.91157	0.00485549	Other	Other
99657711..99657712	4	99657211	99658212	-	Foxd3	-1.17146	0.911308	0.268398	Other	Other
54807079..54807079	11	54806579	54807579	+	null	-1.04261	0.911195	0.286909	Other	Other
83779861..83779866	15	83779361	83780366	+	Mpped1	-1.64386	0.910896	0.275166	Other	Other
oe = 0.88	6	52259487	52261698	+	Hoxa13	0.0279029	0.910814	0.0359177	Other	Other
oe = 0.69	19	11222624	11224363	+	null	-1.90104	0.910566	0.206824	Other	Other
98355498..98355505	13	98354998	98356005	-	Foxd1	-0.634065	0.910126	0.134083	Other	Other
oe = 0.65	X	49493303	49494841	+	Arhgap36	-1.39467	0.909891	0.26149	Other	Other
79481930..79481932	14	79481430	79482432	-	Elf1	1.81287	0.909848	0.000307245	Other	Other
139563882..139563883	3	139563382	139564383	-	B930007M17Rik	-2.17386	0.90976	0.136045	Other	Other
oe = 0.97	14	118705282	118707047	+	Abcc4	1.52547	0.908896	0.000634267	Other	Other
47298511..47298518	14	47298011	47299018	-	Mapk1ip1l	0.999491	0.908891	0.00374338	Other	Other
oe = 0.94	15	82340492	82341913	+	Fam109b	0.327025	0.908598	0.00810838	Other	Other
oe = 0.87	14	54780604	54782490	+	Slc7a8	0.540273	0.908508	0.00457135	Other	Other
oe = 0.84	14	39552471	39554119	+	null	-3.07252	0.908305	0.121507	Other	Other
136204443..136204445	5	136203943	136204945	+	null	-2.44295	0.908091	0.206753	Other	Other
66286198..66286198	15	66285698	66286698	+	Kcnq3	-0.12208	0.907954	0.0688689	Other	Other
oe = 0.78	4	134342512	134343991	+	Slc30a2	-0.48067	0.907847	0.181005	Other	Other
71215725..71215734	9	71215225	71216234	-	Aldh1a2	-0.799371	0.906485	0.108451	Other	Other
71215734..71215740	9	71215234	71216240	+	Aldh1a2	-0.799371	0.906485	0.108451	Other	Other
6065396..6065399	11	6064896	6065899	+	Camk2b	0.0391755	0.906071	0.0100033	Other	Other
oe = 0.61	7	60775120	60776650	+	null	-3.60762	0.905767	0.193617	Other	Other
oe = 0.83	1	104968113	104970101	+	Cdh20	-1.79493	0.905531	0.34803	Other	Other
75845327..75845335	14	75844827	75845835	+	Gm4285	2.12059	0.904834	5.44552e-06	Other	Other
69805405..69805409	14	69804905	69805909	-	Rhobtb2	1.28928	0.904503	0.0017453	Other	Other
oe = 0.69	14	52256889	52258572	+	null	1.72439	0.904335	0.0010153	Other	Other
13471698..13471701	3	13471198	13472201	-	null	-0.560366	0.9039	0.188418	Other	Other
79390399..79390400	14	79389899	79390900	-	Naa16	1.76804	0.903686	2.25417e-05	Other	Other
57058010..57058013	14	57057510	57058513	+	Gja3	-0.438352	0.902363	0.121837	Other	Other
99821395..99821396	X	99820895	99821896	-	Tmem28	-2.51446	0.901839	0.393061	Other	Other
81706861..81706867	7	81706361	81707367	-	Homer2	0.131973	0.901796	0.00815511	Other	Other
47298475..47298475	14	47297975	47298975	+	Mapk1ip1l	1.00772	0.901787	0.00488016	Other	Other
oe = 1.24	7	30688690	30690244	+	null	-3.42269	0.901659	0.186408	Other	Other
oe = 0.79	16	28444519	28447445	+	Fgf12	1.32418	0.901514	0.00318528	Other	Other
oe = 0.81	14	69731655	69733304	+	Chmp7	1.95668	0.901455	0.000452422	Other	Other
77156678..77156682	14	77156178	77157182	+	Enox1	1.34056	0.90106	0.000650702	Other	Other
26839602..26839604	17	26839102	26840104	-	Nkx2-5	-0.336681	0.900891	0.0304256	Other	Other
oe = 0.62	11	116221436	116223558	+	Evpl	0.611398	0.900731	0.00485549	Other	Other
16061864..16061868	7	16061364	16062368	-	null	-1.42031	0.899598	0.324748	Other	Other
45219764..45219769	14	45219264	45220269	+	Txndc16	2.01492	0.898537	7.46228e-06	Other	Other
oe = 0.77	2	70561545	70564507	+	1500002O10Rik	1.63574	0.898253	1.99848e-05	Other	Other
28446489..28446494	16	28445989	28446994	+	Fgf12	0.510924	0.897622	0.0207952	Other	Other
oe = 0.66	13	85843837	85846194	+	null	-3.27114	0.89759	0.375535	Other	Other
61648370..61648372	14	61647870	61648872	-	null	1.06042	0.897259	0.00325416	Other	Other
107794725..107794726	11	107794225	107795226	-	Cacng4	0.127235	0.897014	0.0354834	Other	Other
oe = 0.65	10	63723015	63724736	+	Ctnna3	-3.62448	0.896897	0.0722355	Other	Other
95528262..95528266	15	95527762	95528766	+	Nell2	0.338962	0.896768	0.0392067	Other	Other
oe = 0.72	X	22047928	22049410	+	null	-2.98576	0.896154	0.399202	Other	Other
oe = 0.68	14	54135256	54136790	+	Trdj2	-2.65928	0.89579	0.213868	Other	Other
oe = 0.85	3	89159236	89160761	+	Hcn3	0.999295	0.895593	0.000749616	Other	Other
60210583..60210587	11	60210083	60211087	-	Srebf1	1.14399	0.894981	0.00322934	Other	Other
oe = 0.65	13	6673473	6675003	+	null	-2.12308	0.894433	0.298426	Other	Other
oe = 0.83	12	98574032	98575879	+	Kcnk10	1.48082	0.894075	0.000391264	Other	Other
oe = 0.91	13	77604381	77605808	+	2210408I21Rik	-1.92755	0.893548	0.298435	Other	Other
60210530..60210530	11	60210030	60211030	+	Srebf1	1.12965	0.893528	0.00334338	Other	Other
oe = 0.91	11	62560021	62561519	+	null	-0.469225	0.892692	0.0383564	Other	Other
61648333..61648335	14	61647833	61648835	-	null	1.06732	0.892642	0.00287628	Other	Other
61648338..61648340	14	61647838	61648840	+	null	1.06732	0.892642	0.00287628	Other	Other
28446521..28446521	16	28446021	28447021	+	Fgf12	0.512025	0.89258	0.0265786	Other	Other
81706876..81706877	7	81706376	81707377	+	Homer2	0.125668	0.892339	0.0098649	Other	Other
47649271..47649279	14	47648771	47649779	+	null	1.2038	0.89181	0.00200329	Other	Other
12158559..12158561	X	12158059	12159061	+	Bcor	-1.17734	0.891808	0.0800249	Other	Other
83779839..83779841	15	83779339	83780341	+	Mpped1	-1.65679	0.891491	0.288885	Other	Other
oe = 0.89	X	65974533	65976251	+	null	-3.33545	0.891423	0.192176	Other	Other
47412671..47412671	8	47412171	47413171	+	Gm10083	0.45546	0.890812	0.0152201	Other	Other
55363381..55363386	1	55362881	55363886	+	Boll	-1.20306	0.890686	0.332334	Other	Other
oe = 0.88	7	81706041	81707703	+	Homer2	0.618535	0.890507	0.0101973	Other	Other
oe = 0.71	12	52206639	52208169	+	Nubpl	-1.45194	0.889821	0.214773	Other	Other
oe = 0.71	8	91433471	91434875	+	Fto	-2.38847	0.889683	0.338737	Other	Other
oe = 0.83	12	73544789	73547056	+	Tmem30b	0.471963	0.889608	0.00593868	Other	Other
oe = 0.76	11	7062766	7064750	+	Adcy1	0.702663	0.889559	0.00121081	Other	Other
75845303..75845312	14	75844803	75845812	-	Gm4285	2.13082	0.889343	6.77897e-06	Other	Other
60210563..60210568	11	60210063	60211068	-	Srebf1	1.14403	0.8887	0.00346393	Other	Other
104467508..104467513	14	104467008	104468013	+	Pou4f1	-0.00744717	0.888412	0.0462765	Other	Other
oe = 0.82	14	70350528	70352079	+	Slc39a14	1.25635	0.888153	0.0122283	Other	Other
52316798..52316800	6	52316298	52317300	+	Evx1	-0.799922	0.88756	0.0900227	Other	Other
98792871..98792875	15	98792371	98793375	-	Wnt1	-0.274958	0.887395	0.0428624	Other	Other
oe = 0.87	14	79451334	79453055	+	Gm5465	0.380726	0.887208	0.0762728	Other	Other
49213857..49213859	6	49213357	49214359	+	Igf2bp3	0.0113571	0.886946	0.0714672	Other	Other
oe = 0.62	2	28393241	28394689	+	null	-0.494211	0.88693	0.0513634	Other	Other
52014523..52014534	14	52014023	52015034	+	Zfp219	0.218211	0.886795	0.00556968	Other	Other
81706802..81706802	7	81706302	81707302	+	Homer2	0.192304	0.886356	0.0114883	Other	Other
89931156..89931164	1	89930656	89931664	-	Gbx2	0.525896	0.88635	0.00338103	Other	Other
oe = 0.91	19	35655857	35657297	+	null	-2.46144	0.885997	0.234432	Other	Other
oe = 0.67	15	76521505	76524389	+	Scrt1	1.97893	0.885478	9.0632e-05	Other	Other
55363399..55363404	1	55362899	55363904	+	Boll	-1.20655	0.885452	0.336283	Other	Other
oe = 0.91	3	8392411	8393851	+	null	-2.83851	0.885267	0.367347	Other	Other
102026834..102026836	11	102026334	102027336	-	Mpp3	0.98726	0.884977	0.00270505	Other	Other
38627313..38627317	1	38626813	38627817	-	Aff3	0.192868	0.884942	0.0663073	Other	Other
oe = 0.84	18	16849888	16851340	+	null	-2.32041	0.883985	0.452568	Other	Other
oe = 0.63	3	88484117	88485623	+	Lmna	0.13222	0.883489	0.0314809	Other	MES
5307484..5307490	19	5306984	5307990	-	Gal3st3	-0.590389	0.882999	0.0479815	Other	Other
oe = 0.62	6	101642818	101644772	+	null	-2.37471	0.882842	0.243419	Other	Other
oe = 0.68	3	20740181	20741848	+	null	-1.66303	0.882822	0.252602	Other	Other
oe = 0.89	2	74667276	74669350	+	Hoxd13	-0.0528543	0.882754	0.0089516	Other	Other
oe = 0.93	13	45078051	45079618	+	Gm9817	-1.03778	0.882591	0.266202	Other	Other
88189816..88189816	6	88189316	88190316	+	null	0.850276	0.882505	0.00321349	Other	Other
oe = 0.84	13	117601784	117603436	+	Hcn1	0.450922	0.882352	0.0126971	Other	Other
60210494..60210499	11	60209994	60210999	-	Srebf1	1.14613	0.882109	0.00203146	Other	Other
5307575..5307579	19	5307075	5308079	-	Gal3st3	-0.560182	0.881918	0.0539844	Other	Other
oe = 0.90	14	54893557	54895126	+	Gm20521	2.01152	0.881888	6.3325e-05	Other	Other
52260271..52260278	6	52259771	52260778	+	Hoxa13	-0.817829	0.881549	0.127373	Other	Other
oe = 0.83	15	84852964	84857060	+	Phf21b	2.84264	0.881488	0.000390168	Other	Other
102819262..102819264	11	102818762	102819764	+	Gjc1	0.355642	0.881223	0.0183466	Other	Other
70562018..70562020	2	70561518	70562520	+	1500002O10Rik	0.862354	0.880985	0.00190049	Other	Other
17837630..17837639	19	17837130	17838139	-	Pcsk5	0.892971	0.880657	0.00229318	Other	Other
99380789..99380793	15	99380289	99381293	+	null	-1.33723	0.880291	0.163902	Other	Other
28452269..28452271	7	28451769	28452771	-	Samd4b	-1.49761	0.880133	0.0696245	Other	Other
oe = 0.79	9	28402743	28404210	+	Opcml	0.537512	0.879935	0.0323294	Other	Other
oe = 0.69	10	55503675	55505205	+	null	-2.84821	0.879228	0.368124	Other	Other
75845273..75845280	14	75844773	75845780	-	Gm4285	2.12075	0.879033	1.30464e-05	Other	Other
oe = 0.80	12	111270562	111272497	+	Amn	0.608993	0.878896	0.0259556	Other	Other
oe = 0.69	3	133641633	133643163	+	null	-2.26998	0.878687	0.12143	Other	Other
70766820..70766825	14	70766320	70767325	-	Xpo7	1.01527	0.878272	0.000374541	Other	Other
52014597..52014603	14	52014097	52015103	+	Zfp219	0.127811	0.878166	0.0134115	Other	Other
183422989..183422990	1	183422489	183423490	+	Hhipl2	-1.07273	0.877912	0.115874	Other	Other
oe = 0.70	14	41723203	41724972	+	null	-3.51001	0.877864	0.0762885	Other	Other
86421749..86421755	12	86421249	86422255	+	Esrrb	0.474904	0.877609	0.0420777	Other	Other
oe = 0.91	17	69524705	69526145	+	null	-1.47648	0.877596	0.309535	Other	Other
49213862..49213864	6	49213362	49214364	+	Igf2bp3	0.00511603	0.877584	0.0692239	Other	Other
oe = 0.82	X	159413731	159416017	+	Mtap7d2	0.210434	0.877488	0.03532	Other	Other
oe = 0.97	14	54685730	54687499	+	Acin1	2.55131	0.877166	1.64979e-05	Other	Other
oe = 0.64	5	88545529	88547483	+	null	-2.59725	0.87619	0.231291	Other	Other
oe = 0.99	11	102817992	102820158	+	Gjc1	1.07194	0.876009	0.00606047	Other	Other
oe = 0.77	15	66285282	66287405	+	Kcnq3	0.868326	0.875975	0.00591052	Other	Other
oe = 0.82	14	46787332	46788939	+	Cnih	1.54975	0.875716	0.000852339	Other	Other
99626833..99626834	7	99626333	99627334	+	Gm4980	0.0605088	0.875533	0.0926054	Other	Other
86421779..86421780	12	86421279	86422280	+	Esrrb	0.472987	0.875289	0.0392888	Other	Other
oe = 0.80	19	40872634	40874049	+	null	0.195653	0.875063	0.0587017	Other	Other
oe = 0.85	2	91931058	91932692	+	Mdk	0.262921	0.874935	0.0259556	Other	Other
oe = 0.95	14	51064319	51066042	+	null	2.14012	0.874776	0.000514066	Other	Other
oe = 0.92	15	84104809	84106429	+	Sult4a1	0.217351	0.874628	0.066236	Other	Other
oe = 0.76	6	22124594	22126115	+	A430107O13Rik	-1.5308	0.874407	0.270595	Other	Other
oe = 0.72	15	98775821	98777508	+	Wnt10b	0.452386	0.874072	0.0363902	Other	Other
71728198..71728204	15	71727698	71728704	+	Fam135b	-0.45169	0.873994	0.093234	Other	Other
167597535..167597536	2	167597035	167598036	+	Gm11476	-0.655667	0.873915	0.0669292	Other	Other
98792634..98792640	15	98792134	98793140	-	Wnt1	-0.179604	0.873825	0.0139445	Other	Other
88189836..88189839	6	88189336	88190339	+	null	0.858822	0.873396	0.0034191	Other	Other
38627277..38627281	1	38626777	38627781	+	Aff3	0.147336	0.873079	0.0838131	Other	Other
oe = 0.84	1	38626294	38628584	+	Aff3	1.12292	0.8729	0.0044161	Other	Other
75155616..75155618	X	75155116	75156118	+	4930428E23Rik	-3.53117	0.872182	0.24565	Other	Other
31965991..31965995	11	31965491	31966495	-	4930524B15Rik	-0.883921	0.871531	0.0522761	Other	Other
oe = 0.64	15	95653769	95655215	+	Dbx2	0.0731266	0.871426	0.280727	Other	Other
107370926..107370932	7	107370426	107371432	-	Syt9	0.35146	0.871173	0.0294562	Other	Other
60210472..60210477	11	60209972	60210977	+	Srebf1	1.13974	0.871157	0.00296813	Other	Other
46788328..46788334	14	46787828	46788834	+	Cnih	1.20404	0.870515	0.000973707	Other	Other
oe = 0.83	12	64886243	64888231	+	null	-1.82527	0.870291	0.257472	Other	Other
137322675..137322679	7	137322175	137323179	-	null	-0.780158	0.870265	0.102269	Other	Other
46787816..46787817	14	46787316	46788317	+	Cnih	1.18716	0.869952	0.00209373	Other	Other
oe = 1.02	10	70188505	70190040	+	Ccdc6	-0.301076	0.869872	0.0766874	Other	Other
oe = 0.71	1	95666866	95668268	+	St8sia4	1.23198	0.869823	0.00575872	Other	Other
70153242..70153247	14	70152742	70153747	+	2610301G19Rik	1.14049	0.869412	0.00137679	Other	Other
107794641..107794644	11	107794141	107795144	-	Cacng4	0.053015	0.869174	0.0591525	Other	Other
17837551..17837554	19	17837051	17838054	+	Pcsk5	0.846986	0.868781	0.00311057	Other	Other
oe = 0.97	14	75844330	75846482	+	Gm4285	2.39107	0.868659	2.09374e-06	Other	Other
75155790..75155793	X	75155290	75156293	-	4930428E23Rik	-3.49534	0.868443	0.228982	Other	Other
oe = 0.69	11	60476169	60477669	+	Myo15	0.326011	0.86766	0.032571	Other	Other
84876455..84876460	12	84875955	84876960	-	Ltbp2	0.166933	0.866443	0.0222737	Other	Other
24526791..24526793	5	24526291	24527293	+	Gbx1	-0.157504	0.866052	0.0504394	Other	Other
oe = 0.79	14	67232819	67234350	+	Gm20675	0.486526	0.865574	0.0026269	Other	Other
oe = 0.97	13	31596748	31598175	+	null	-2.69323	0.86547	0.400204	Other	Other
79390553..79390557	14	79390053	79391057	+	Naa16	1.74875	0.865445	1.91079e-05	Other	Other
oe = 0.82	14	67234904	67236976	+	Ebf2	0.838534	0.865435	0.00585461	Other	Other
oe = 0.83	17	26838132	26840320	+	Nkx2-5	0.30915	0.865267	0.00792985	Other	Other
45529997..45530003	14	45529497	45530503	-	Fermt2	1.3255	0.864964	0.000222563	Other	Other
oe = 0.68	1	188341364	188343101	+	Ush2a	-2.51152	0.864928	0.284946	Other	Other
oe = 0.91	3	25416358	25417819	+	null	-1.66136	0.864722	0.218292	Other	Other
99657717..99657720	4	99657217	99658220	+	Foxd3	-1.15585	0.864485	0.300529	Other	Other
37242306..37242309	5	37241806	37242809	+	Crmp1	0.219028	0.863919	0.0479522	Other	Other
oe = 0.91	14	55721352	55722805	+	Rabggta	1.01265	0.863782	0.00644152	Other	Other
132543398..132543401	5	132542898	132543901	+	Auts2	1.41374	0.863766	0.000496292	Other	Other
5307473..5307475	19	5306973	5307975	-	Gal3st3	-0.603225	0.863745	0.0556982	Other	Other
oe = 1.00	14	9728290	9729718	+	Fhit	-2.47434	0.862041	0.362742	Other	Other
5307594..5307597	19	5307094	5308097	-	Gal3st3	-0.573451	0.862016	0.0676633	Other	Other
67715155..67715158	14	67714655	67715658	+	Cdca2	1.77543	0.861871	0.000158403	Other	Other
61648312..61648314	14	61647812	61648814	-	null	1.0272	0.861758	0.00413665	Other	Other
122490778..122490780	14	122490278	122491280	+	Gm10837	-0.605038	0.861448	0.0656742	Other	Other
oe = 0.90	14	52013476	52015359	+	Zfp219	0.785498	0.861363	0.00261247	Other	Other
104466390..104466395	14	104465890	104466895	+	Pou4f1	-1.39451	0.861333	0.264561	Other	Other
oe = 0.68	11	64434573	64437135	+	AL646051.1	1.41864	0.861148	0.00407696	Other	Other
89410257..89410267	15	89409757	89410767	-	Syce3	-0.810581	0.860898	0.228519	Other	Other
98355424..98355426	13	98354924	98355926	+	Foxd1	-0.609394	0.860858	0.0879303	Other	Other
oe = 0.73	14	51884184	51885786	+	Mettl17	1.43854	0.860658	0.00109391	Other	Other
oe = 0.63	1	65979040	65980643	+	null	-1.74206	0.860632	0.0327338	Other	Other
82299164..82299166	15	82298664	82299666	+	Wbp2nl	-0.510476	0.860149	0.0786581	Other	Other
54686392..54686396	14	54685892	54686896	-	Acin1	2.2908	0.860093	1.99848e-05	Other	Other
24526708..24526710	5	24526208	24527210	-	Gbx1	-0.129837	0.859913	0.0266254	Other	Other
oe = 0.78	14	61555800	61558058	+	6330409N04Rik	1.98094	0.859811	0.000200095	Other	Other
37242195..37242199	5	37241695	37242699	+	Crmp1	0.308844	0.859344	0.0469746	Other	Other
6065824..6065828	11	6065324	6066328	-	Camk2b	0.00403934	0.859192	0.00784187	Other	Other
73143423..73143428	14	73142923	73143928	-	Rcbtb2	1.25585	0.859052	0.00019051	Other	Other
oe = 0.63	7	44551487	44552899	+	Nr1h2	0.307906	0.859044	0.0413941	Other	Other
oe = 1.03	16	70638728	70640155	+	null	-2.25778	0.858931	0.240084	Other	Other
oe = 0.88	14	58252086	58253526	+	null	-0.960132	0.858741	0.0719933	Other	Other
37242259..37242266	5	37241759	37242766	+	Crmp1	0.280075	0.858741	0.0503373	Other	Other
96005718..96005724	11	96005218	96006224	-	Igf2bp1	-1.47032	0.858675	0.424763	Other	Other
oe = 0.87	7	16061024	16062750	+	null	-0.480499	0.858263	0.0714829	Other	Other
oe = 0.83	14	65357547	65359702	+	Zfp395	1.63372	0.857762	0.000184739	Other	Other
136637817..136637824	4	136637317	136638324	-	Lactbl1	-1.11547	0.85741	0.364077	Other	Other
oe = 0.91	17	47467858	47469298	+	AI661453	0.035547	0.857397	0.0429322	Other	Other
oe = 0.88	18	63540276	63541996	+	null	-2.39296	0.857389	0.395104	Other	Other
oe = 0.85	17	84096060	84097562	+	null	1.48446	0.857252	0.000327669	Other	Other
oe = 1.00	18	73263075	73264502	+	null	-2.33168	0.856872	0.289988	Other	Other
oe = 0.83	15	80090612	80092383	+	Syngr1	1.16713	0.856856	0.00326435	Other	Other
61172987..61172989	14	61172487	61173489	+	Sacs	2.04435	0.856511	8.59967e-05	Other	Other
oe = 0.89	5	24525496	24527769	+	Gbx1	0.777136	0.856379	0.00457669	Other	Other
70153425..70153429	14	70152925	70153929	-	2610301G19Rik	1.30477	0.856053	0.000541756	Other	Other
104466451..104466454	14	104465951	104466954	+	Pou4f1	-1.44888	0.85504	0.249704	Other	Other
113195353..113195356	6	113194853	113195856	+	Lhfpl4	0.250579	0.854952	0.0328389	Other	Other
45529824..45529829	14	45529324	45530329	+	Fermt2	1.21481	0.854898	0.000454808	Other	Other
47412632..47412633	8	47412132	47413133	+	Gm10083	0.478156	0.854582	0.0177908	Other	Other
126162745..126162750	4	126162245	126163250	+	1700029G01Rik	-0.565705	0.854581	0.16095	Other	Other
115040840..115040842	14	115040340	115041342	-	Mir17hg	0.738153	0.854504	0.0094406	Other	Other
oe = 0.93	4	74013062	74014462	+	Frmd3	1.24205	0.854217	0.00152419	Other	Other
71215676..71215687	9	71215176	71216187	-	Aldh1a2	-0.823393	0.853523	0.142623	Other	Other
80287555..80287564	15	80287055	80288064	-	Cacna1i	-0.981852	0.853207	0.126704	Other	Other
oe = 0.61	17	23557252	23558665	+	Zfp213	0.12684	0.85316	0.0313216	Other	Other
103810201..103810207	11	103809701	103810707	-	Wnt3	0.118049	0.852789	0.0434431	Other	Other
oe = 0.69	15	101438042	101439521	+	Krt83	-0.344595	0.852733	0.0698031	Other	Other
oe = 0.73	14	62836746	62838647	+	Wdfy2	2.21755	0.852715	7.50267e-05	Other	Other
160366707..160366712	2	160366207	160367212	+	Mafb	1.42563	0.852053	6.28362e-05	Other	Other
17837528..17837533	19	17837028	17838033	+	Pcsk5	0.861411	0.852038	0.00317996	Other	Other
oe = 0.65	15	78671440	78673148	+	Elfn2	0.272862	0.851714	0.0231551	Other	Other
45529871..45529873	14	45529371	45530373	-	Fermt2	1.26012	0.851296	0.000473943	Other	Other
oe = 0.81	14	54875904	54878106	+	Ppp1r3e	1.98418	0.851076	1.99848e-05	Other	Other
oe = 0.80	14	55559453	55561230	+	A730061H03Rik	2.44849	0.851063	9.48202e-05	Other	Other
54686304..54686306	14	54685804	54686806	+	Acin1	2.22876	0.850909	2.0407e-05	Other	Other
71544711..71544714	2	71544211	71545214	+	Dlx2	-0.427178	0.850885	0.0839049	Other	Other
102819321..102819321	11	102818821	102819821	+	Gjc1	0.276369	0.850535	0.032522	Other	Other
151129047..151129053	4	151128547	151129553	+	Camta1	0.383023	0.850265	0.0232037	Other	Other
102819390..102819399	11	102818890	102819899	-	Gjc1	0.210512	0.850256	0.0486914	Other	Other
15438666..15438669	14	15438166	15439169	+	Lrrc3b	0.00895676	0.850163	0.0375637	Other	Other
oe = 0.75	2	47668929	47670450	+	null	-2.45592	0.849932	0.44579	Other	Other
oe = 0.74	18	23038677	23040674	+	Nol4	1.46526	0.849826	0.000388701	Other	Other
80287550..80287556	15	80287050	80288056	+	Cacna1i	-0.984187	0.849704	0.129151	Other	Other
oe = 0.70	6	48628747	48630257	+	AI854703	-0.00852973	0.849426	0.0482362	Other	Other
45302192..45302199	19	45301692	45302699	-	null	-0.100288	0.849405	0.0123237	Other	Other
oe = 0.79	8	71583664	71585479	+	Slc27a1	0.283456	0.849392	0.037541	Other	Other
86421839..86421841	12	86421339	86422341	-	Esrrb	0.468639	0.849114	0.0412813	Other	Other
61172951..61172958	14	61172451	61173458	+	Sacs	2.03928	0.848909	7.30032e-05	Other	Other
107794742..107794752	11	107794242	107795252	-	Cacng4	0.145897	0.848819	0.0413396	Other	Other
oe = 1.12	X	88882624	88884166	+	null	-3.35756	0.848617	0.272217	Other	Other
28564907..28564911	16	28564407	28565411	+	null	-0.482671	0.848569	0.27804	Other	Other
5307525..5307529	19	5307025	5308029	+	Gal3st3	-0.599209	0.848286	0.0480137	Other	Other
49213914..49213917	6	49213414	49214417	+	Igf2bp3	0.0449375	0.848	0.0674689	Other	Other
45530236..45530241	14	45529736	45530741	-	Fermt2	1.3366	0.847738	9.19827e-05	Other	Other
33464375..33464381	18	33463875	33464881	-	D0H4S114	1.38956	0.847673	0.000347514	Other	Other
28403519..28403520	9	28403019	28404020	-	Opcml	0.178229	0.84761	0.0688284	Other	Other
53068216..53068220	6	53067716	53068720	+	Jazf1	-0.38136	0.847515	0.0145365	Other	Other
85661029..85661030	15	85660529	85661530	-	null	-0.261286	0.847048	0.0220815	Other	Other
45220029..45220033	14	45219529	45220533	+	Txndc16	1.8851	0.846381	4.94792e-05	Other	Other
oe = 0.97	14	115039830	115042903	+	Mir17hg	1.9383	0.845731	0.000202272	Other	Other
22631946..22631948	17	22631446	22632448	-	null	-2.28367	0.845648	0.355896	Other	Other
154856058..154856064	4	154855558	154856564	+	Ttc34	0.482911	0.844985	0.0278272	Other	Other
oe = 0.74	12	86989458	86991053	+	Zdhhc22	0.413862	0.844977	0.00912887	Other	Other
54686283..54686285	14	54685783	54686785	+	Acin1	2.22714	0.844416	2.50484e-05	Other	Other
45219926..45219932	14	45219426	45220432	-	Txndc16	1.99161	0.844154	5.0957e-05	Other	Other
oe = 0.67	4	151128193	151130063	+	Camta1	0.976477	0.84335	0.00415379	Other	Other
oe = 0.84	14	109916969	109918434	+	null	-2.85988	0.842659	0.150819	Other	Other
oe = 0.79	14	61172176	61174031	+	Sacs	2.20085	0.842167	6.28362e-05	Other	Other
104467453..104467456	14	104466953	104467956	-	Pou4f1	-0.0185328	0.842133	0.0612867	Other	Other
45529742..45529750	14	45529242	45530250	+	Fermt2	1.14521	0.841935	0.000340854	Other	Other
oe = 0.84	14	121034564	121036880	+	Farp1	1.51319	0.841817	0.000515606	Other	Other
129984841..129984847	4	129984341	129985347	-	Bai2	0.209072	0.841776	0.0831826	Other	Other
oe = 0.68	1	131307688	131309427	+	Srgap2	-1.74906	0.841598	0.418471	Other	Other
24526736..24526741	5	24526236	24527241	-	Gbx1	-0.142063	0.841575	0.0525697	Other	Other
oe = 0.77	4	136636748	136638559	+	Lactbl1	-0.345407	0.841455	0.294441	Other	Other
104466413..104466416	14	104465913	104466916	-	Pou4f1	-1.39832	0.841414	0.246092	Other	Other
oe = 0.90	17	55377123	55378628	+	null	-2.09138	0.841384	0.43529	Other	Other
98355367..98355374	13	98354867	98355874	-	Foxd1	-0.567431	0.840606	0.0784468	Other	Other
oe = 0.84	14	119137099	119139695	+	Hs6st3	1.2126	0.840544	0.00576908	Other	Other
157914529..157914535	2	157914029	157915035	+	Vstm2l	-1.31753	0.840319	0.357693	Other	Other
oe = 0.97	14	57797449	57799279	+	Sap18	1.30223	0.840258	0.00069819	Other	Other
oe = 0.77	X	141721086	141722654	+	Irs4	-0.900681	0.8401	0.225075	Other	Other
oe = 0.85	14	65833155	65834570	+	Esco2	1.35144	0.839946	0.000280521	Other	Other
136637835..136637838	4	136637335	136638338	+	Lactbl1	-1.11452	0.839782	0.377422	Other	Other
31939363..31939366	18	31938863	31939866	+	Lims2	-1.15994	0.839528	0.14128	Other	Other
oe = 0.77	17	27434219	27435670	+	Grm4	-0.156131	0.839039	0.100764	Other	Other
70562313..70562314	2	70561813	70562814	-	1500002O10Rik	0.693623	0.838755	0.00686988	Other	Other
131106235..131106240	3	131105735	131106740	-	null	0.0930325	0.83847	0.0554922	Other	Other
122486596..122486607	6	122486096	122487107	-	Rimklb	-0.214785	0.837902	0.0370282	Other	Other
80758066..80758069	12	80757566	80758569	-	Gm1568	-1.21261	0.836965	0.307835	Other	Other
53068176..53068177	6	53067676	53068677	-	Jazf1	-0.451185	0.836959	0.0125039	Other	Other
53068255..53068261	6	53067755	53068761	+	Jazf1	-0.42418	0.836912	0.0150832	Other	Other
67715432..67715433	14	67714932	67715933	+	Cdca2	2.29587	0.836888	0.000145442	Other	Other
45529771..45529779	14	45529271	45530279	+	Fermt2	1.1742	0.836813	0.00045831	Other	Other
oe = 0.88	8	46293926	46295397	+	Helt	0.97292	0.836497	0.0654358	Other	Other
oe = 0.84	5	84416675	84418103	+	Epha5	1.2657	0.836372	0.00130612	Other	Other
oe = 0.83	10	81189515	81190975	+	Dapk3	0.424516	0.836228	0.0478162	Other	Other
13868302..13868302	16	13867802	13868802	+	Pdxdc1	-0.717588	0.836025	0.118749	Other	Other
45529887..45529894	14	45529387	45530394	-	Fermt2	1.27303	0.835698	0.000533114	Other	Other
oe = 1.02	14	79586729	79588274	+	Sugt1	1.90285	0.835684	7.30032e-05	Other	Other
99468932..99468935	7	99468432	99469435	-	Klhl35	-1.35098	0.835629	0.303391	Other	Other
oe = 0.76	14	65149069	65150733	+	null	1.43175	0.835604	0.00436642	Other	Other
102819413..102819418	11	102818913	102819918	-	Gjc1	0.164256	0.835357	0.0482362	Other	Other
65886412..65886413	1	65885912	65886913	-	null	-1.5419	0.835293	0.324566	Other	Other
oe = 0.98	11	60209860	60211271	+	Srebf1	1.43353	0.834445	0.000985716	Other	Other
104466439..104466440	14	104465939	104466940	+	Pou4f1	-1.46289	0.834027	0.257612	Other	Other
160366773..160366774	2	160366273	160367274	+	Mafb	1.43494	0.833839	9.16075e-05	Other	Other
45529904..45529907	14	45529404	45530407	-	Fermt2	1.27176	0.8338	0.000450792	Other	Other
54894148..54894149	14	54893648	54894649	+	Gm20521	1.82288	0.833766	0.000689936	Other	Other
oe = 0.64	17	93288363	93289884	+	null	-3.31384	0.833545	0.215972	Other	Other
oe = 0.73	10	81363495	81365452	+	Mfsd12	0.788557	0.833476	0.0670306	Other	Other
107794571..107794573	11	107794071	107795073	-	Cacng4	0.0741578	0.833342	0.0439691	Other	Other
84069615..84069618	12	84069115	84070118	+	Acot5	-0.800533	0.833076	0.082993	Other	Other
oe = 0.70	3	4584135	4585875	+	null	-1.84314	0.833049	0.295522	Other	Other
94945256..94945263	10	94944756	94945763	-	Plxnc1	0.475482	0.83296	0.00891405	Other	Other
80287518..80287523	15	80287018	80288023	-	Cacna1i	-1.0284	0.832729	0.130792	Other	Other
oe = 0.90	14	67714617	67717035	+	Cdca2	2.83094	0.832695	6.1666e-06	Other	Other
oe = 0.74	14	70553573	70555629	+	Hr	0.915497	0.83212	0.016972	Other	Other
oe = 0.97	14	46821388	46822868	+	Gmfb	1.29805	0.832036	0.00347619	Other	Other
oe = 0.79	14	50807015	50808461	+	AC027184.1	1.46636	0.831739	0.0305974	Other	Other
oe = 0.83	13	83186397	83187831	+	null	-1.68944	0.831656	0.282514	Other	Other
151129085..151129087	4	151128585	151129587	+	Camta1	0.394063	0.831594	0.0271662	Other	Other
60210418..60210421	11	60209918	60210921	-	Srebf1	1.14278	0.831519	0.00190036	Other	Other
80287273..80287278	15	80286773	80287778	+	Cacna1i	-0.919226	0.831337	0.158567	Other	Other
151376370..151376375	4	151375870	151376875	+	Camta1	-1.37203	0.83126	0.465823	Other	Other
oe = 0.91	6	58068033	58069475	+	null	-2.84218	0.830514	0.366098	Other	Other
80287494..80287501	15	80286994	80288001	-	Cacna1i	-1.00773	0.830062	0.152483	Other	Other
oe = 0.90	8	77890868	77892380	+	null	-1.90549	0.828914	0.222789	Other	Other
122486557..122486558	6	122486057	122487058	+	Rimklb	-0.255024	0.828042	0.0382474	Other	Other
38627419..38627422	1	38626919	38627922	+	Aff3	0.238378	0.827359	0.0706492	Other	Other
83632071..83632075	17	83631571	83632575	-	Kcng3	-0.131515	0.82699	0.0387762	Other	Other
71215782..71215790	9	71215282	71216290	+	Aldh1a2	-0.807161	0.826605	0.151618	Other	Other
45302099..45302103	19	45301599	45302603	+	null	-0.0664214	0.826411	0.0206333	Other	Other
55560557..55560559	14	55560057	55561059	-	A730061H03Rik	2.28212	0.825797	0.000129877	Other	Other
80287420..80287429	15	80286920	80287929	+	Cacna1i	-0.938813	0.825771	0.192237	Other	Other
11664891..11664895	X	11664391	11665395	-	null	-0.494275	0.825706	0.064883	Other	Other
52014643..52014646	14	52014143	52015146	-	Zfp219	0.158005	0.825458	0.0139445	Other	Other
oe = 0.70	15	90678586	90680678	+	Cpne8	1.7553	0.825377	0.00107233	Other	Other
154856075..154856078	4	154855575	154856578	-	Ttc34	0.465685	0.825302	0.0279763	Other	Other
oe = 1.00	5	115126492	115127898	+	Unc119b	0.000901042	0.82482	0.00805528	Other	Other
73839778..73839782	15	73839278	73840282	-	Gm628	0.777937	0.824818	0.0038547	Other	Other
122486676..122486683	6	122486176	122487183	-	Rimklb	-0.192644	0.824579	0.0466493	Other	Other
oe = 0.91	14	45528996	45530966	+	Fermt2	1.76624	0.824501	0.000435844	Other	Other
28452140..28452146	7	28451640	28452646	-	Samd4b	-1.28062	0.824361	0.0654734	Other	Other
oe = 0.62	2	56798255	56801723	+	null	-2.10573	0.824234	0.346197	Other	Other
oe = 0.92	1	185457725	185459184	+	Slc30a10	-1.11779	0.824071	0.388832	Other	Other
oe = 0.91	6	53067335	53069331	+	Jazf1	0.35102	0.823655	0.00425074	Other	Other
oe = 0.86	13	66867894	66869357	+	null	-3.54618	0.823619	0.449722	Other	Other
oe = 0.64	9	69758673	69761745	+	Foxb1	1.19555	0.823569	0.01247	Other	Other
54894205..54894209	14	54893705	54894709	-	Gm20521	1.82331	0.82353	0.000483592	Other	Other
38627510..38627517	1	38627010	38628017	-	Aff3	0.229891	0.822728	0.0598971	Other	Other
33821171..33821176	5	33820671	33821676	+	Whsc1	1.05253	0.822398	0.00111961	Other	Other
96299420..96299426	11	96298920	96299926	+	0610040B09Rik	-1.27676	0.822143	0.368556	Other	Other
107794820..107794823	11	107794320	107795323	-	Cacng4	0.0904082	0.821925	0.0888536	Other	Other
oe = 0.60	7	127610530	127612640	+	Zfp629	0.615849	0.821821	0.0368913	Other	Other
oe = 0.89	14	56884958	56887819	+	Zmym2	1.47411	0.82171	0.0655491	Other	Other
122049877..122049881	5	122049377	122050381	-	Cux2	0.659299	0.821362	0.00729383	Other	Other
122049884..122049889	5	122049384	122050389	+	Cux2	0.659299	0.821362	0.00729383	Other	Other
oe = 0.77	14	47188375	47190028	+	Gch1	1.00752	0.821272	0.00435317	Other	Other
47649418..47649421	14	47648918	47649921	+	null	1.25244	0.821171	0.00418017	Other	Other
70562354..70562356	2	70561854	70562856	-	1500002O10Rik	0.709782	0.821143	0.00488528	Other	Other
45302230..45302234	19	45301730	45302734	-	null	-0.10683	0.821074	0.0150417	Other	Other
38627446..38627458	1	38626946	38627958	+	Aff3	0.234035	0.820844	0.0722003	Other	Other
13471657..13471662	3	13471157	13472162	-	null	-0.602764	0.820594	0.250403	Other	Other
102819331..102819335	11	102818831	102819835	-	Gjc1	0.272302	0.820451	0.0391635	Other	Other
38627475..38627478	1	38626975	38627978	+	Aff3	0.236415	0.819508	0.0742525	Other	Other
13471553..13471558	3	13471053	13472058	+	null	-0.468979	0.81927	0.12863	Other	Other
84096721..84096725	17	84096221	84097225	-	null	1.26813	0.819138	0.00065685	Other	Other
33821168..33821177	5	33820668	33821677	-	Whsc1	1.05484	0.818815	0.00117181	Other	Other
50509556..50509559	17	50509056	50510059	-	Plcl2	0.798764	0.818754	0.021923	Other	Other
oe = 0.84	14	45317640	45319458	+	Ero1l	1.53108	0.818706	0.00232985	Other	Other
41220369..41220378	13	41219869	41220878	-	Elovl2	0.0429393	0.818668	0.0483179	Other	Other
13868279..13868281	16	13867779	13868781	-	Pdxdc1	-0.713233	0.818574	0.130019	Other	Other
oe = 0.91	5	37241099	37243115	+	Crmp1	0.850615	0.818297	0.0294268	Other	Other
45529807..45529813	14	45529307	45530313	+	Fermt2	1.2033	0.818209	0.000608396	Other	Other
38627421..38627421	1	38626921	38627921	+	Aff3	0.231969	0.817747	0.0734197	Other	Other
73839636..73839640	15	73839136	73840140	-	Gm628	0.782549	0.817714	0.0024006	Other	Other
oe = 1.08	15	99125645	99127744	+	Spats2	1.82783	0.817709	8.09517e-05	Other	Other
oe = 0.84	15	99669759	99671604	+	Accn2	1.05941	0.817689	0.00111291	Other	Other
54894116..54894121	14	54893616	54894621	+	Gm20521	1.80384	0.817606	0.00106	Other	Other
oe = 0.89	2	10553490	10555346	+	Sfmbt2	-2.14788	0.817394	0.203098	Other	Other
73839664..73839668	15	73839164	73840168	+	Gm628	0.805856	0.817034	0.00277281	Other	Other
oe = 0.81	4	126162172	126163837	+	1700029G01Rik	0.114855	0.816936	0.0565867	Other	Other
oe = 0.86	11	77930303	77932138	+	Sez6	1.27324	0.816713	0.00266384	Other	Other
53068158..53068163	6	53067658	53068663	-	Jazf1	-0.464722	0.816655	0.0154173	Other	Other
oe = 0.77	5	33429940	33436052	+	Nkx1-1	1.77412	0.816332	0.00354846	Other	Other
24902999..24903000	7	24902499	24903500	-	Arhgef1	-0.0503575	0.816188	0.160639	Other	Other
122486655..122486659	6	122486155	122487159	-	Rimklb	-0.198373	0.815986	0.0436384	Other	Other
33464400..33464407	18	33463900	33464907	-	D0H4S114	1.38262	0.815835	0.000285433	Other	Other
oe = 0.97	14	50924138	50925831	+	Osgep	1.56571	0.815794	0.000833641	Other	Other
33821204..33821208	5	33820704	33821708	-	Whsc1	1.03266	0.815784	0.00116409	Other	Other
24903004..24903008	7	24902504	24903508	+	Arhgef1	-0.0446568	0.815767	0.16547	Other	Other
136637855..136637864	4	136637355	136638364	-	Lactbl1	-1.11363	0.815753	0.395001	Other	Other
oe = 0.78	19	8251653	8253184	+	null	-0.423057	0.815638	0.132584	Other	Other
52014723..52014729	14	52014223	52015229	+	Zfp219	0.116366	0.815624	0.0194932	Other	Other
33434105..33434108	5	33433605	33434608	-	Nkx1-1	-0.321056	0.814692	0.0994026	Other	Other
160366745..160366745	2	160366245	160367245	+	Mafb	1.41939	0.814481	0.00010023	Other	Other
oe = 1.80	17	19911276	19912679	+	null	-2.39498	0.81421	0.220838	Other	Other
75845087..75845090	14	75844587	75845590	-	Gm4285	2.0925	0.814183	2.50484e-05	Other	Other
oe = 0.68	3	53720806	53722336	+	null	-1.77303	0.814109	0.298426	Other	Other
5307444..5307445	19	5306944	5307945	+	Gal3st3	-0.636503	0.813828	0.0735596	Other	Other
oe = 0.63	1	75713498	75715876	+	null	-2.72126	0.813548	0.265624	Other	Other
47649707..47649713	14	47649207	47650213	-	null	1.27607	0.81341	0.0141304	Other	Other
63758370..63758376	7	63757870	63758876	-	Otud7a	-0.963133	0.813188	0.400718	Other	Other
66867598..66867601	14	66867098	66868101	-	Dpysl2	0.63866	0.81315	0.00596326	Other	Other
78307812..78307816	14	78307312	78308316	+	Tnfsf11	-1.20495	0.812722	0.180891	Other	Other
99468898..99468901	7	99468398	99469401	+	Klhl35	-1.36662	0.812167	0.314022	Other	Other
53068205..53068206	6	53067705	53068706	-	Jazf1	-0.378675	0.811821	0.0114159	Other	Other
100130940..100130942	12	100130440	100131442	-	BC002230	0.0513787	0.81161	0.0572726	Other	Other
33821146..33821148	5	33820646	33821648	+	Whsc1	1.04545	0.811421	0.00142447	Other	Other
oe = 0.82	14	70576967	70578710	+	Nudt18	1.63701	0.811273	0.00137143	Other	Other
50509784..50509788	17	50509284	50510288	+	Plcl2	0.740323	0.811199	0.0126602	Other	Other
oe = 0.69	4	152159195	152161007	+	Hes2	0.676582	0.811033	0.00590025	Other	Other
oe = 0.79	14	118233965	118237721	+	Sox21	2.82344	0.810921	2.8653e-05	Other	Other
57798344..57798348	14	57797844	57798848	+	Sap18	1.06097	0.8109	0.00385353	Other	Other
50509716..50509719	17	50509216	50510219	+	Plcl2	0.761164	0.810138	0.0214809	Other	Other
160367000..160367003	2	160366500	160367503	-	Mafb	1.5002	0.809782	0.000101877	Other	Other
oe = 0.71	11	97138145	97139819	+	Tbkbp1	0.170853	0.809779	0.0229396	Other	Other
69834232..69834238	11	69833732	69834738	-	Nlgn2	-0.499614	0.809713	0.237462	Other	Other
104466553..104466557	14	104466053	104467057	-	Pou4f1	-1.22152	0.809484	0.162039	Other	Other
oe = 0.68	2	168268019	168269729	+	Kcng1	0.0370279	0.809455	0.0922702	Other	Other
oe = 0.89	13	90442656	90444376	+	null	-2.23408	0.809254	0.331066	Other	Other
oe = 0.72	11	103333300	103334813	+	Arhgap27	0.223805	0.809249	0.063363	Other	Other
oe = 0.89	14	57524184	57526392	+	Il17d	0.878887	0.809192	0.00180876	Other	Other
oe = 0.65	15	101411711	101413317	+	Krt7	0.33308	0.808576	0.00848859	Other	Other
102818832..102818834	11	102818332	102819334	-	Gjc1	0.296864	0.808215	0.0389146	Other	Other
oe = 0.73	2	102608451	102610195	+	Pamr1	-1.39536	0.808076	0.171201	Other	Other
47649803..47649803	14	47649303	47650303	+	null	1.21475	0.807933	0.0194881	Other	Other
oe = 0.68	X	14190258	14191996	+	null	-3.08221	0.807711	0.32079	Other	Other
129984769..129984777	4	129984269	129985277	+	Bai2	0.244916	0.807531	0.102882	Other	Other
oe = 0.78	7	107369801	107371999	+	Syt9	0.852213	0.807425	0.0133221	Other	Other
oe = 1.00	2	119743326	119744942	+	Itpka	0.374532	0.80693	0.0677008	Other	Other
107794799..107794803	11	107794299	107795303	-	Cacng4	0.0948281	0.806845	0.140133	Other	Other
41220257..41220257	13	41219757	41220757	+	Elovl2	-0.0414912	0.806529	0.070944	Other	Other
52014478..52014484	14	52013978	52014984	+	Zfp219	0.168465	0.806372	0.0206333	Other	Other
126735331..126735338	4	126734831	126735838	+	Tfap2e	-0.424674	0.806362	0.171476	Other	Other
83779979..83779983	15	83779479	83780483	-	Mpped1	-1.87695	0.806327	0.348835	Other	Other
104466332..104466341	14	104465832	104466841	-	Pou4f1	-1.49697	0.806073	0.434453	Other	Other
50509812..50509814	17	50509312	50510314	-	Plcl2	0.749382	0.806045	0.0122262	Other	Other
160366796..160366802	2	160366296	160367302	-	Mafb	1.45103	0.805878	9.3799e-05	Other	Other
oe = 0.64	6	91284682	91286221	+	null	1.45333	0.805503	0.00522797	Other	Other
4844744..4844750	7	4844244	4845250	-	Shisa7	0.185234	0.804918	0.065718	Other	Other
25318875..25318879	2	25318375	25319379	+	Grin1	0.449895	0.804829	0.00997889	Other	Other
38627340..38627345	1	38626840	38627845	-	Aff3	0.223783	0.804749	0.0741805	Other	Other
84096762..84096763	17	84096262	84097263	-	null	1.2439	0.804567	0.00045831	Other	Other
122486631..122486639	6	122486131	122487139	-	Rimklb	-0.218336	0.804558	0.0434559	Other	Other
126735357..126735360	4	126734857	126735860	+	Tfap2e	-0.386257	0.80444	0.20078	Other	Other
oe = 0.79	11	102025967	102027867	+	Mpp3	1.4503	0.804015	0.00239312	Other	Other
69881614..69881615	8	69881114	69882115	+	Cilp2	-0.565885	0.802905	0.0987264	Other	Other
oe = 0.98	2	164506885	164508392	+	Pigt	-0.990419	0.802766	0.235759	Other	Other
66882696..66882699	5	66882196	66883199	+	Limch1	-0.867378	0.802697	0.144844	Other	Other
oe = 0.71	7	80874881	80876611	+	Zscan2	-0.154631	0.80247	0.0316089	Other	Other
71215648..71215655	9	71215148	71216155	-	Aldh1a2	-0.854843	0.802315	0.159137	Other	Other
oe = 0.79	1	34749759	34751585	+	Arhgef4	-0.128538	0.802068	0.12207	Other	Other
22338600..22338603	2	22338100	22339103	+	Myo3a	-1.35142	0.801738	0.383363	Other	Other
oe = 0.88	14	122106401	122108204	+	A330035P11Rik	1.64673	0.800674	0.000672289	Other	Other
37063682..37063687	3	37063182	37064187	+	Adad1	-0.301892	0.800493	0.0647828	Other	Other
102819287..102819293	11	102818787	102819793	+	Gjc1	0.35555	0.799254	0.0344231	Other	Other
oe = 0.63	3	151678062	151680178	+	null	-2.57777	0.799014	0.379082	Other	Other
oe = 0.89	5	132541094	132544613	+	Auts2	2.25205	0.798828	0.000159388	Other	Other
28732697..28732701	7	28732197	28733201	+	Fbxo17	-0.220403	0.798791	0.0448426	Other	Other
33821226..33821228	5	33820726	33821728	+	Whsc1	1.01258	0.798158	0.00151407	Other	Other
oe = 0.86	9	18261283	18262726	+	null	-3.20414	0.7981	0.359487	Other	Other
oe = 0.82	14	60784016	60785465	+	Gm15919	1.08041	0.797519	0.0100649	Other	Other
oe = 0.69	X	155226811	155228544	+	null	-3.11888	0.797342	0.22142	Other	Other
oe = 0.83	X	11664071	11665841	+	null	-0.0370693	0.797305	0.0270254	Other	Other
33821118..33821118	5	33820618	33821618	+	Whsc1	1.04873	0.797274	0.00237051	Other	Other
oe = 0.81	14	76555753	76557442	+	Serp2	0.712526	0.797125	0.00694025	Other	Other
99626638..99626639	7	99626138	99627139	-	Gm4980	0.440058	0.797081	0.0505204	Other	Other
46821902..46821906	14	46821402	46822406	+	Gmfb	1.14422	0.797041	0.00913268	Other	Other
oe = 0.97	16	60772544	60773995	+	null	-1.82376	0.796699	0.19793	Other	Other
41220671..41220678	13	41220171	41221178	-	Elovl2	0.155385	0.796463	0.0243031	Other	Other
oe = 0.75	10	80586023	80587486	+	Fam108a	0.237291	0.796347	0.0427553	Other	Other
118234961..118234963	14	118234461	118235463	+	Sox21	0.642153	0.79627	0.0401978	Other	Other
oe = 0.89	10	23349235	23351105	+	Eya4	0.81476	0.795958	0.00316877	Other	Other
99224945..99224948	15	99224445	99225448	-	Kcnh3	0.500732	0.79528	0.0280201	Other	Other
52014474..52014476	14	52013974	52014976	-	Zfp219	0.127888	0.795005	0.0325331	Other	Other
oe = 0.64	X	114266406	114268528	+	null	-3.5766	0.794403	0.445589	Other	Other
11664704..11664707	X	11664204	11665207	+	null	-0.467925	0.794358	0.0613657	Other	Other
41220375..41220383	13	41219875	41220883	+	Elovl2	0.0919424	0.794113	0.0253582	Other	Other
102819291..102819301	11	102818791	102819801	-	Gjc1	0.352038	0.793986	0.0340784	Other	Other
oe = 0.78	8	67792336	67793809	+	Psd3	-2.05026	0.793629	0.341108	Other	Other
84096665..84096669	17	84096165	84097169	-	null	1.25081	0.793156	0.00222117	Other	Other
102818796..102818796	11	102818296	102819296	+	Gjc1	0.297692	0.792893	0.0511957	Other	Other
oe = 0.66	1	34929535	34931139	+	null	-1.06491	0.792379	0.446142	Other	Other
oe = 0.69	3	29081890	29083518	+	Egfem1	0.246609	0.792145	0.0455384	Other	Other
oe = 0.81	8	70891618	70893387	+	Slc5a5	0.588135	0.79198	0.0328418	Other	Other
oe = 0.69	1	16952609	16954349	+	null	-2.05075	0.791907	0.3186	Other	Other
160366965..160366968	2	160366465	160367468	+	Mafb	1.51011	0.791592	8.42305e-05	Other	Other
oe = 0.65	14	124653848	124655590	+	Fgf14	-2.81792	0.790928	0.244041	Other	Other
120478602..120478607	14	120478102	120479107	+	Rap2a	1.86805	0.79079	7.30032e-05	Other	Other
oe = 0.67	4	49844191	49846420	+	Grin3a	1.61313	0.790398	0.0080748	Other	Other
oe = 1.16	8	50995626	50997106	+	null	-2.06921	0.790393	0.261986	Other	Other
24526574..24526577	5	24526074	24527077	+	Gbx1	-0.0888705	0.790215	0.0271525	Other	Other
38627352..38627352	1	38626852	38627852	+	Aff3	0.2164	0.790151	0.0872095	Other	Other
oe = 0.65	13	87568967	87570843	+	null	-2.24543	0.789957	0.329562	Other	Other
102818818..102818826	11	102818318	102819326	+	Gjc1	0.295547	0.789675	0.0429322	Other	Other
80287545..80287548	15	80287045	80288048	-	Cacna1i	-1.02423	0.789635	0.166353	Other	Other
oe = 0.70	11	103079696	103081130	+	Plcd3	-0.174914	0.789615	0.0618611	Other	Other
70766375..70766378	14	70765875	70766878	+	Xpo7	0.866419	0.789529	0.00222057	Other	Other
52504355..52504361	12	52503855	52504861	-	null	1.91924	0.789312	0.000161708	Other	Other
oe = 0.87	5	122048887	122051025	+	Cux2	1.19995	0.789165	0.000854162	Other	Other
oe = 0.85	1	25829346	25831180	+	Bai3	1.22871	0.78896	0.00904117	Other	Other
oe = 0.71	12	83771243	83772737	+	Papln	-0.160777	0.788853	0.112221	Other	Other
oe = 0.80	3	103574679	103577105	+	Syt6	1.05209	0.788555	0.0362264	Other	Other
oe = 0.91	17	50508188	50510509	+	Plcl2	1.44863	0.788482	0.00267633	Other	Other
53068244..53068245	6	53067744	53068745	-	Jazf1	-0.408029	0.788459	0.0234452	Other	Other
33821273..33821280	5	33820773	33821780	-	Whsc1	0.987241	0.788133	0.00157675	Other	Other
oe = 0.69	15	32832606	32834127	+	null	-1.95435	0.787859	0.315846	Other	Other
oe = 0.92	14	120910226	120912325	+	Ipo5	1.95854	0.787154	0.0014127	Other	Other
122049759..122049765	5	122049259	122050265	+	Cux2	0.576692	0.787098	0.0154678	Other	Other
122486849..122486852	6	122486349	122487352	-	Rimklb	-0.144808	0.787028	0.0553736	Other	Other
33433596..33433601	5	33433096	33434101	+	Nkx1-1	-0.405427	0.786801	0.0517744	Other	Other
70766416..70766417	14	70765916	70766917	+	Xpo7	0.856466	0.786157	0.00253558	Other	Other
oe = 0.94	14	48445740	48447204	+	6720456H20Rik	1.41433	0.785866	0.00213771	Other	Other
oe = 0.79	15	99096046	99098911	+	Dnajc22	1.45303	0.785852	0.00111072	Other	Other
97935495..97935496	5	97934995	97935996	-	Antxr2	-1.16659	0.785794	0.145948	Other	Other
61557304..61557307	14	61556804	61557807	+	6330409N04Rik	1.39595	0.785768	0.00424519	Other	Other
oe = 0.73	7	44351478	44354213	+	Shank1	1.38006	0.785563	0.00375865	Other	Other
oe = 0.84	8	29218627	29220512	+	Unc5d	0.449036	0.785436	0.0603563	Other	Other
oe = 0.71	2	18031116	18032683	+	A930004D18Rik	-0.109663	0.7854	0.0700799	Other	Other
24526868..24526873	5	24526368	24527373	-	Gbx1	-0.224436	0.785363	0.0750803	Other	Other
55490899..55490908	14	55490399	55491408	+	Lrrc16b	1.00029	0.785295	0.0322962	Other	Other
24526765..24526766	5	24526265	24527266	-	Gbx1	-0.159535	0.784656	0.0633963	Other	Other
oe = 0.85	19	43600828	43602267	+	null	0.0771867	0.784635	0.0191643	Other	Other
oe = 0.78	9	40454839	40456647	+	Gramd1b	1.42252	0.7846	0.00681479	Other	Other
oe = 0.66	18	86560189	86561719	+	null	-2.1219	0.784487	0.338466	Other	Other
oe = 0.65	4	94912182	94914105	+	4930579C15Rik	-2.38536	0.7839	0.353421	Other	Other
oe = 0.89	14	46831280	46833143	+	Gm10101	1.54659	0.783888	0.00230961	Other	Other
28732684..28732688	7	28732184	28733188	+	Fbxo17	-0.230546	0.783577	0.0503371	Other	Other
102819299..102819307	11	102818799	102819807	+	Gjc1	0.345011	0.783446	0.0459378	Other	Other
oe = 0.68	17	63671211	63672741	+	null	-2.2898	0.78334	0.31857	Other	Other
115040963..115040971	14	115040463	115041471	+	Mir17hg	0.732125	0.783056	0.0134721	Other	Other
24903035..24903043	7	24902535	24903543	+	Arhgef1	-0.0725937	0.782834	0.1841	Other	Other
oe = 0.85	5	52901311	52903248	+	null	-1.90949	0.782613	0.272186	Other	Other
oe = 0.94	15	26908949	26910376	+	null	-1.83224	0.782385	0.424783	Other	Other
70351467..70351471	14	70350967	70351971	+	Slc39a14	0.899074	0.782322	0.0540473	Other	Other
102087626..102087626	4	102087126	102088126	+	Pde4b	-0.509286	0.782298	0.0656894	Other	Other
118706429..118706432	14	118705929	118706932	-	Abcc4	1.25513	0.781748	0.00492661	Other	Other
130362002..130362007	2	130361502	130362507	-	Ebf4	-0.519833	0.781572	0.155033	Other	Other
oe = 0.85	5	35056288	35057859	+	Dok7	0.929423	0.781304	0.00411395	Other	Other
oe = 0.81	14	55490344	55491892	+	Lrrc16b	1.23545	0.781069	0.00444232	Other	Other
4993652..4993655	7	4993152	4994155	-	Zfp579	-0.46682	0.781028	0.158914	Other	Other
84417272..84417278	5	84416772	84417778	+	Epha5	1.0768	0.78097	0.00180876	Other	Other
80758275..80758278	12	80757775	80758778	-	Gm1568	-1.02077	0.780398	0.226419	Other	Other
33821259..33821261	5	33820759	33821761	+	Whsc1	0.991413	0.780314	0.00210619	Other	Other
121974114..121974119	8	121973614	121974619	-	Gm20388	-1.09858	0.780165	0.139175	Other	Other
46787893..46787901	14	46787393	46788401	+	Cnih	1.25772	0.78005	0.00260613	Other	Other
25433278..25433279	17	25432778	25433779	-	Cacna1h	1.04106	0.779632	0.00325416	Other	Other
126735314..126735316	4	126734814	126735816	+	Tfap2e	-0.40936	0.779568	0.19073	Other	Other
oe = 0.80	15	85820937	85822394	+	Pkdrej	-0.172765	0.779469	0.156623	Other	Other
oe = 1.05	14	64651853	64653394	+	Kif13b	1.13914	0.778963	0.00381207	Other	Other
129984747..129984750	4	129984247	129985250	+	Bai2	0.271111	0.778906	0.103593	Other	Other
33821093..33821096	5	33820593	33821596	-	Whsc1	1.05568	0.778506	0.0032187	Other	Other
oe = 0.68	14	50557310	50558977	+	null	-2.81985	0.778307	0.366963	Other	Other
80287331..80287333	15	80286831	80287833	-	Cacna1i	-0.97053	0.778196	0.207804	Other	Other
oe = 0.90	14	79425848	79427729	+	Kbtbd7	1.124	0.778128	0.0176536	Other	Other
oe = 0.88	14	52196135	52198159	+	Supt16h	1.76527	0.778116	0.00127676	Other	Other
46787888..46787888	14	46787388	46788388	+	Cnih	1.24059	0.778108	0.00242372	Other	Other
oe = 0.75	4	154855151	154856964	+	Ttc34	0.928214	0.777949	0.0103314	Other	Other
oe = 0.76	X	44788865	44790607	+	Dcaf12l1	-1.0444	0.777797	0.172483	Other	Other
107370837..107370844	7	107370337	107371344	+	Syt9	0.309569	0.777237	0.0298737	Other	Other
99126637..99126642	15	99126137	99127142	+	Spats2	1.31478	0.776616	0.000722423	Other	Other
73839491..73839495	15	73838991	73839995	+	Gm628	0.746159	0.77656	0.00728358	Other	Other
81707063..81707066	7	81706563	81707566	-	Homer2	0.0348993	0.776056	0.0495246	Other	Other
99126426..99126443	15	99125926	99126943	+	Spats2	1.36527	0.77566	0.000652382	Other	Other
84417301..84417303	5	84416801	84417803	-	Epha5	1.06223	0.775621	0.00160241	Other	Other
48121128..48121134	14	48120628	48121634	-	Peli2	0.93788	0.775486	0.00675799	Other	Other
oe = 0.66	9	63143639	63149912	+	Skor1	2.03313	0.775134	0.0147256	Other	Other
oe = 0.84	9	88671688	88673153	+	null	-3.38734	0.775067	0.390826	Other	Other
oe = 0.76	17	8432986	8435337	+	T	0.630333	0.774918	0.012393	Other	Other
154855875..154855878	4	154855375	154856378	-	Ttc34	0.463112	0.774783	0.042537	Other	Other
44433875..44433876	9	44433375	44434376	+	Foxr1	-0.678507	0.77455	0.226307	Other	Other
46787934..46787935	14	46787434	46788435	-	Cnih	1.25236	0.774546	0.00180876	Other	Other
120478474..120478481	14	120477974	120478981	-	Rap2a	2.07266	0.774441	7.93216e-05	Other	Other
63255791..63255791	14	63255291	63256291	+	Gata4	-1.13199	0.77443	0.311798	Other	Other
oe = 0.79	5	66025984	66027691	+	Rbm47	-0.193544	0.774427	0.0814162	Other	Other
132543187..132543187	5	132542687	132543687	+	Auts2	1.31267	0.774392	0.00553299	Other	Other
120478435..120478435	14	120477935	120478935	+	Rap2a	2.1445	0.77428	5.35814e-05	Other	Other
66404166..66404171	4	66403666	66404671	+	Astn2	0.748751	0.773428	0.0173753	Other	Other
oe = 0.93	11	120320446	120322013	+	null	-2.80435	0.773383	0.390948	Other	Other
48446366..48446366	14	48445866	48446866	+	6720456H20Rik	1.29164	0.77332	0.00121081	Other	Other
oe = 1.02	15	79504649	79506645	+	Kcnj4	1.35704	0.773318	0.000781795	Other	Other
99224703..99224709	15	99224203	99225209	+	Kcnh3	0.570525	0.773112	0.0120928	Other	Other
166309305..166309306	1	166308805	166309806	-	Ildr2	-0.397401	0.77273	0.182735	Other	Other
oe = 0.96	4	110350811	110352476	+	Elavl4	1.14257	0.772649	0.011293	Other	Other
oe = 0.69	11	46013609	46015073	+	Sox30	-1.52622	0.772508	0.351541	Other	Other
52191928..52191938	6	52191428	52192438	-	Gm20653	0.565714	0.772478	0.0128836	Other	Other
23350096..23350098	10	23349596	23350598	-	Eya4	0.268498	0.77235	0.032647	Other	Other
102087607..102087608	4	102087107	102088108	+	Pde4b	-0.499952	0.772316	0.0698031	Other	Other
73839606..73839614	15	73839106	73840114	-	Gm628	0.760436	0.772139	0.00467093	Other	Other
oe = 0.67	14	49883950	49885572	+	null	-2.30965	0.771702	0.188205	Other	Other
120478432..120478435	14	120477932	120478935	-	Rap2a	2.14546	0.771388	5.33527e-05	Other	Other
71215814..71215819	9	71215314	71216319	+	Aldh1a2	-0.807074	0.771381	0.189598	Other	Other
122107054..122107056	14	122106554	122107556	+	A330035P11Rik	1.45554	0.770869	0.00183355	Other	Other
80091408..80091413	15	80090908	80091913	-	Syngr1	0.683698	0.770665	0.0348655	Other	Other
129984978..129984986	4	129984478	129985486	-	Bai2	0.140068	0.770096	0.0994026	Other	Other
27142499..27142503	2	27141999	27143003	+	Fam163b	-0.152202	0.769212	0.121746	Other	Other
70608245..70608245	8	70607745	70608745	+	Ssbp4	1.02059	0.769209	0.00296079	Other	Other
oe = 0.71	14	54911660	54913615	+	Slc22a17	1.00905	0.769198	0.0136892	Other	Other
oe = 0.90	14	57889311	57891037	+	Zdhhc20	1.83859	0.768919	0.000667203	Other	Other
121035656..121035664	14	121035156	121036164	+	Farp1	0.713471	0.768914	0.00543691	Other	Other
oe = 0.85	14	51984073	51985596	+	Arhgef40	1.25375	0.768894	0.00526496	Other	Other
95415870..95415874	10	95415370	95416374	+	Socs2	0.674312	0.768811	0.0228868	Other	Other
oe = 0.87	14	121377859	121380032	+	Stk24	1.98019	0.768624	0.00319206	Other	Other
30958669..30958677	6	30958169	30959177	+	Klf14	-1.32833	0.768621	0.217004	Other	Other
53068568..53068570	6	53068068	53069070	+	Jazf1	-0.338214	0.768606	0.0115503	Other	Other
33820652..33820658	5	33820152	33821158	+	Whsc1	1.29045	0.768282	0.0013303	Other	Other
74733467..74733472	15	74732967	74733972	-	Lypd2	-0.655184	0.768258	0.151988	Other	Other
120478487..120478487	14	120477987	120478987	+	Rap2a	2.03252	0.767632	8.61207e-05	Other	Other
80287709..80287709	15	80287209	80288209	+	Cacna1i	-0.978563	0.767559	0.198556	Other	Other
129984979..129984983	4	129984479	129985483	+	Bai2	0.138251	0.767371	0.100266	Other	Other
65391170..65391174	9	65390670	65391674	+	Kbtbd13	-0.181458	0.767225	0.0377509	Other	Other
73839565..73839565	15	73839065	73840065	+	Gm628	0.760043	0.767053	0.00715577	Other	Other
67236458..67236458	14	67235958	67236958	+	Ebf2	-0.545876	0.766937	0.104751	Other	Other
oe = 0.73	15	99456599	99458645	+	Nckap5l	2.0124	0.76657	0.00204905	Other	Other
54876630..54876634	14	54876130	54877134	-	Ppp1r3e	1.48221	0.766542	0.000495223	Other	Other
172940153..172940155	2	172939653	172940655	-	Bmp7	1.48773	0.766516	0.000533114	Other	Other
115040914..115040915	14	115040414	115041415	-	Mir17hg	0.70919	0.766497	0.0232924	Other	Other
136637880..136637885	4	136637380	136638385	-	Lactbl1	-1.09697	0.766334	0.428393	Other	Other
oe = 0.90	14	50929862	50931813	+	Tmem55b	2.41289	0.766023	3.7507e-05	Other	Other
oe = 0.77	17	7826491	7827915	+	Fndc1	0.634986	0.765912	0.0131346	Other	Other
52504343..52504344	12	52503843	52504844	+	null	1.93802	0.765853	0.000186719	Other	Other
oe = 0.75	15	31200205	31201654	+	null	-1.5521	0.765303	0.126978	Other	Other
oe = 0.65	18	22877233	22878754	+	Nol4	-2.99707	0.765301	0.51871	Other	Other
oe = 0.78	11	119052728	119054561	+	null	1.68297	0.764864	0.00249807	Other	Other
oe = 0.82	6	52244486	52247077	+	Hoxa11	0.433885	0.764444	0.0755463	Other	Other
oe = 0.73	7	137308688	137311121	+	Ebf3	0.849636	0.763959	0.0309749	Other	Other
33820732..33820736	5	33820232	33821236	-	Whsc1	1.27932	0.763946	0.00193345	Other	Other
23350081..23350090	10	23349581	23350590	+	Eya4	0.262835	0.763855	0.0336922	Other	Other
70608272..70608275	8	70607772	70608775	-	Ssbp4	1.03578	0.763782	0.00367723	Other	Other
107794853..107794859	11	107794353	107795359	-	Cacng4	0.0480477	0.76376	0.116032	Other	Other
121379127..121379131	14	121378627	121379631	+	Stk24	1.502	0.763756	0.00366574	Other	Other
oe = 0.62	14	45894667	45896134	+	Gm15218	-2.29831	0.76375	0.171858	Other	Other
172940029..172940037	2	172939529	172940537	+	Bmp7	1.47988	0.763707	0.000374541	Other	Other
131307335..131307335	5	131306835	131307835	+	Wbscr17	-0.220099	0.763653	0.124799	Other	Other
122107078..122107085	14	122106578	122107585	-	A330035P11Rik	1.44643	0.763427	0.00218008	Other	Other
102818740..102818745	11	102818240	102819245	-	Gjc1	0.296816	0.763086	0.0548064	Other	Other
oe = 0.82	14	55884261	55885800	+	Khnyn	1.73183	0.763059	0.00322037	Other	Other
46294553..46294557	8	46294053	46295057	-	Helt	0.619518	0.762688	0.122173	Other	Other
oe = 1.21	2	16027889	16029442	+	null	-3.79186	0.762654	0.407653	Other	Other
63255882..63255884	14	63255382	63256384	+	Gata4	-1.21513	0.762628	0.294891	Other	Other
117602612..117602621	13	117602112	117603121	+	Hcn1	-0.060195	0.762561	0.038785	Other	Other
33821299..33821303	5	33820799	33821803	-	Whsc1	0.959504	0.762471	0.00191814	Other	Other
oe = 0.72	7	129256100	129257689	+	Ppapdc1a	0.850004	0.762421	0.00587332	Other	Other
73839439..73839440	15	73838939	73839940	-	Gm628	0.723617	0.762334	0.00877474	Other	Other
oe = 0.69	14	58074359	58077344	+	Fgf9	1.14567	0.76229	0.093925	Other	Other
120478784..120478786	14	120478284	120479286	-	Rap2a	1.45506	0.762114	0.000743973	Other	Other
63255913..63255913	14	63255413	63256413	+	Gata4	-1.21554	0.762012	0.29566	Other	Other
99656999..99657004	4	99656499	99657504	-	Foxd3	-1.4647	0.762005	0.34815	Other	Other
99126439..99126439	15	99125939	99126939	+	Spats2	1.34963	0.761891	0.000720394	Other	Other
107794897..107794899	11	107794397	107795399	-	Cacng4	0.0256167	0.761669	0.127914	Other	Other
oe = 0.93	6	52190554	52192726	+	Gm20653	1.06088	0.761591	0.00322492	Other	Other
33464479..33464484	18	33463979	33464984	-	D0H4S114	1.32314	0.76148	0.000376989	Other	Other
oe = 0.72	6	88189080	88191468	+	null	1.4294	0.761478	0.0037116	Other	Other
33820751..33820757	5	33820251	33821257	-	Whsc1	1.29005	0.761381	0.00267238	Other	Other
81707060..81707061	7	81706560	81707561	+	Homer2	0.025006	0.761216	0.0544723	Other	Other
28452103..28452111	7	28451603	28452611	+	Samd4b	-1.29791	0.761204	0.14519	Other	Other
70351199..70351201	14	70350699	70351701	+	Slc39a14	0.957917	0.76049	0.0397871	Other	Other
41220400..41220408	13	41219900	41220908	-	Elovl2	0.127709	0.760277	0.0222737	Other	Other
41220407..41220412	13	41219907	41220912	+	Elovl2	0.127709	0.760277	0.0222737	Other	Other
55885103..55885107	14	55884603	55885607	+	Khnyn	1.4415	0.760009	0.00250331	Other	Other
oe = 0.88	15	73838870	73840470	+	Gm628	1.18741	0.75997	0.00142552	Other	Other
100055868..100055869	14	100055368	100056369	-	Klf12	-3.56767	0.759962	0.245645	Other	Other
117602637..117602643	13	117602137	117603143	-	Hcn1	-0.0443314	0.759949	0.0410336	Other	Other
97935550..97935552	5	97935050	97936052	+	Antxr2	-1.20887	0.759609	0.210777	Other	Other
11664844..11664845	X	11664344	11665345	-	null	-0.440056	0.759604	0.059428	Other	Other
oe = 0.68	6	87732165	87733565	+	Ccdc48	-0.232604	0.759331	0.0221307	Other	Other
oe = 0.77	6	134631609	134633098	+	Mansc1	-0.145763	0.759201	0.176628	Other	Other
oe = 0.88	2	25318227	25319866	+	Grin1	0.658169	0.758899	0.0110857	Other	Other
46787970..46787973	14	46787470	46788473	-	Cnih	1.29593	0.758623	0.00174409	Other	Other
53067987..53067992	6	53067487	53068492	-	Jazf1	-0.622182	0.758615	0.0325772	Other	Other
23350517..23350522	10	23350017	23351022	-	Eya4	0.199674	0.758435	0.0265213	Other	Other
120478740..120478747	14	120478240	120479247	-	Rap2a	1.59292	0.758378	0.000787204	Other	Other
120478654..120478662	14	120478154	120479162	-	Rap2a	1.78052	0.758361	0.000101877	Other	Other
oe = 0.76	7	45631760	45633276	+	Rasip1	-0.1048	0.758183	0.12433	Other	Other
81707098..81707104	7	81706598	81707604	-	Homer2	0.0229735	0.758167	0.0527168	Other	Other
oe = 0.80	17	77920113	77921616	+	null	-2.93686	0.758082	0.287263	Other	Other
33820753..33820757	5	33820253	33821257	+	Whsc1	1.2876	0.757712	0.00267984	Other	Other
122106979..122106982	14	122106479	122107482	-	A330035P11Rik	1.462	0.757637	0.00226306	Other	Other
oe = 0.64	15	92396423	92398000	+	Pdzrn4	0.423468	0.757601	0.203892	Other	Other
oe = 0.66	16	59703743	59705282	+	Epha6	-2.78573	0.757524	0.368561	Other	Other
98327221..98327223	11	98326721	98327723	+	Neurod2	-0.248929	0.757423	0.26205	Other	Other
oe = 0.76	8	87661928	87663531	+	Zfp423	0.364367	0.757232	0.0225688	Other	Other
104467780..104467780	14	104467280	104468280	+	Pou4f1	-0.0111141	0.757083	0.118173	Other	Other
oe = 0.67	3	24967952	24969473	+	null	-1.77983	0.757049	0.38718	Other	Other
117602397..117602404	13	117601897	117602904	+	Hcn1	-0.0443486	0.756969	0.0448854	Other	Other
oe = 0.84	14	45387990	45389595	+	Gnpnat1	1.33942	0.756956	0.000408149	Other	Other
oe = 0.60	8	95327311	95329433	+	Zfp319	0.722567	0.756728	0.014703	Other	Other
oe = 0.89	14	52278426	52280506	+	Rab2b	1.87529	0.756524	0.00229318	Other	Other
98575005..98575013	12	98574505	98575513	-	Kcnk10	1.06643	0.756476	0.0131226	Other	Other
30801446..30801449	2	30800946	30801949	-	1700001O22Rik	-0.498018	0.756267	0.254292	Other	Other
22345004..22345009	5	22344504	22345509	-	Reln	0.0423302	0.756082	0.0875686	Other	Other
oe = 0.76	12	84875102	84877170	+	Ltbp2	0.798883	0.755455	0.00415171	Other	Other
oe = 0.73	11	63646424	63647876	+	null	-2.10035	0.755448	0.307617	Other	Other
95328660..95328662	8	95328160	95329162	-	Zfp319	-0.195009	0.755428	0.0839049	Other	Other
oe = 0.72	6	55451342	55453096	+	Adcyap1r1	0.880804	0.755028	0.0135248	Other	Other
46787937..46787947	14	46787437	46788447	+	Cnih	1.28203	0.754873	0.00190888	Other	Other
oe = 0.88	5	135488355	135489939	+	Hip1	2.03777	0.754799	0.000584692	Other	Other
oe = 0.62	2	130575989	130577470	+	Oxt	0.016849	0.754685	0.0603245	Other	Other
120478660..120478667	14	120478160	120479167	+	Rap2a	1.77456	0.754626	0.000113106	Other	Other
oe = 0.96	15	98634072	98635849	+	Cacnb3	1.31721	0.754459	0.00183864	Other	Other
70766445..70766449	14	70765945	70766949	-	Xpo7	0.892035	0.754437	0.00364826	Other	Other
54877278..54877281	14	54876778	54877781	+	Ppp1r3e	1.36985	0.754292	0.00106818	Other	Other
oe = 0.87	8	85109488	85110947	+	Zfp791	-0.230578	0.753727	0.0974116	Other	Other
52196859..52196861	14	52196359	52197361	+	Supt16h	1.28305	0.75356	0.00142447	Other	Other
87663454..87663456	8	87662954	87663956	-	Zfp423	0.350712	0.753374	0.0168526	Other	Other
oe = 0.72	12	102128103	102129971	+	Gm16339	0.886609	0.75324	0.00554902	Other	Other
120478411..120478415	14	120477911	120478915	+	Rap2a	2.17995	0.753169	2.8653e-05	Other	Other
oe = 0.76	2	36299135	36300665	+	null	-2.03905	0.753083	0.45789	Other	Other
oe = 0.80	15	81871790	81873262	+	Phf5a	2.00024	0.752778	0.0030483	Other	Other
19474457..19474460	7	19473957	19474960	-	null	0.199476	0.752746	0.0372663	Other	Other
oe = 0.80	18	33463302	33464945	+	D0H4S114	1.71857	0.752713	0.000617466	Other	Other
oe = 0.98	7	24902343	24903809	+	Arhgef1	0.416162	0.752327	0.0881404	Other	Other
oe = 0.78	11	102945403	102947367	+	C1ql1	1.08731	0.752323	0.00387925	Other	Other
49213820..49213824	6	49213320	49214324	+	Igf2bp3	-0.0990874	0.752259	0.150019	Other	Other
oe = 0.62	10	41308462	41310195	+	null	-2.27935	0.751992	0.315061	Other	Other
45143684..45143687	19	45143184	45144187	-	null	-0.325718	0.751739	0.0819105	Other	Other
48741673..48741674	1	48741173	48742174	-	null	-2.83764	0.751613	0.413466	Other	Other
104466535..104466537	14	104466035	104467037	-	Pou4f1	-1.26039	0.751179	0.228592	Other	Other
48629624..48629629	6	48629124	48630129	-	AI854703	-0.567101	0.751174	0.138413	Other	Other
oe = 0.88	6	91410468	91412039	+	Wnt7a	0.815821	0.751138	0.0210657	Other	Other
98355625..98355627	13	98355125	98356127	-	Foxd1	-0.590599	0.751124	0.136705	Other	Other
172940487..172940490	2	172939987	172940990	-	Bmp7	1.413	0.751121	0.000874818	Other	Other
31201090..31201091	15	31200590	31201591	-	null	-2.55329	0.750957	0.410255	Other	Other
56778383..56778384	14	56777883	56778884	-	Pspc1	1.58355	0.75078	0.00853351	Other	Other
85502840..85502841	6	85502340	85503341	+	Fbxo41	0.0928477	0.75059	0.0682448	Other	Other
91411378..91411381	6	91410878	91411881	+	Wnt7a	0.423278	0.750315	0.0221777	Other	Other
oe = 0.83	5	24729597	24731342	+	Wdr86	-0.0392125	0.750249	0.0395814	Other	Other
oe = 0.82	1	95237883	95239871	+	null	-2.00348	0.750226	0.483619	Other	Other
oe = 0.81	2	33638700	33641814	+	Lmx1b	1.18072	0.750178	0.00903068	Other	Other
35056957..35056962	5	35056457	35057462	+	Dok7	0.562858	0.749947	0.0130155	Other	Other
oe = 0.91	14	120477211	120479602	+	Rap2a	2.88879	0.7499	2.41156e-05	Other	Other
35388959..35388962	5	35388459	35389462	-	E130018O15Rik	-0.789218	0.749862	0.16547	Other	Other
35388961..35388962	5	35388461	35389462	+	E130018O15Rik	-0.789218	0.749862	0.16547	Other	Other
oe = 0.84	15	14479982	14481381	+	null	-1.84821	0.749854	0.479969	Other	Other
oe = 0.62	3	110056803	110058495	+	Ntng1	-2.566	0.749555	0.387443	Other	Other
102818688..102818690	11	102818188	102819190	+	Gjc1	0.229472	0.74911	0.0461011	Other	Other
122486759..122486762	6	122486259	122487262	-	Rimklb	-0.139464	0.749057	0.0707585	Other	Other
oe = 0.84	11	96318308	96319762	+	Hoxb4	-0.392923	0.748906	0.090461	Other	Other
107794504..107794510	11	107794004	107795010	+	Cacng4	0.157063	0.748621	0.0617527	Other	Other
oe = 0.82	7	84473296	84475224	+	null	-3.48643	0.748559	0.1168	Other	Other
oe = 0.79	2	29844830	29846972	+	Urm1	0.0896905	0.748315	0.0625755	Other	Other
55014959..55014960	14	55014459	55015460	-	Ngdn	2.16649	0.748219	0.000158046	Other	Other
oe = 0.75	7	127618297	127619758	+	null	-2.43756	0.748069	0.358158	Other	Other
7063648..7063651	11	7063148	7064151	+	Adcy1	0.229392	0.747966	0.0349823	Other	Other
79500080..79500082	7	79499580	79500582	+	null	0.0768491	0.747955	0.0605624	Other	Other
99126492..99126496	15	99125992	99126996	+	Spats2	1.3675	0.74783	0.000883831	Other	Other
99126492..99126507	15	99125992	99127007	-	Spats2	1.37265	0.747819	0.000893051	Other	Other
118937671..118937673	14	118937171	118938173	+	Dnajc3	1.9584	0.747656	0.00121081	Other	Other
7063626..7063626	11	7063126	7064126	+	Adcy1	0.222956	0.747582	0.0369817	Other	Other
119053392..119053399	11	119052892	119053899	-	null	1.19127	0.747344	0.00845771	Other	Other
oe = 0.85	2	134746282	134747797	+	null	-2.47403	0.747296	0.296747	Other	Other
oe = 0.92	14	60250445	60252413	+	Nupl1	2.23603	0.747102	8.18655e-05	Other	Other
6800312..6800313	3	6799812	6800813	-	null	-1.86203	0.746674	0.546409	Other	Other
56778336..56778339	14	56777836	56778839	+	Pspc1	1.6086	0.74653	0.00808531	Other	Other
154856090..154856096	4	154855590	154856596	-	Ttc34	0.488623	0.746519	0.0265257	Other	Other
oe = 1.00	6	122485311	122487440	+	Rimklb	0.559299	0.746422	0.043197	Other	Other
102818766..102818768	11	102818266	102819268	-	Gjc1	0.276517	0.746386	0.0658415	Other	Other
25319134..25319137	2	25318634	25319637	-	Grin1	0.286922	0.746237	0.0401757	Other	Other
53067877..53067884	6	53067377	53068384	+	Jazf1	-0.793447	0.746179	0.0742967	Other	Other
oe = 0.69	6	105662529	105664268	+	null	-2.62116	0.746144	0.390761	Other	Other
79500007..79500008	7	79499507	79500508	+	null	0.146611	0.746105	0.0489805	Other	Other
79500029..79500034	7	79499529	79500534	+	null	0.133985	0.746081	0.0529502	Other	Other
73839473..73839477	15	73838973	73839977	-	Gm628	0.734793	0.745764	0.00794608	Other	Other
oe = 0.70	17	16675818	16677261	+	null	-1.752	0.745751	0.43948	Other	Other
33821331..33821331	5	33820831	33821831	+	Whsc1	0.945124	0.745722	0.00186135	Other	Other
97935555..97935563	5	97935055	97936063	-	Antxr2	-1.20423	0.74571	0.223203	Other	Other
oe = 0.76	10	95413887	95417595	+	Socs2	2.54238	0.745692	1.25453e-05	Other	Other
41220454..41220456	13	41219954	41220956	-	Elovl2	0.103499	0.745674	0.0504022	Other	Other
28732748..28732748	7	28732248	28733248	+	Fbxo17	-0.181214	0.745328	0.0334964	Other	Other
57798422..57798424	14	57797922	57798924	-	Sap18	1.04533	0.744965	0.00540761	Other	Other
oe = 0.89	14	49065334	49067040	+	Exoc5	1.73421	0.744649	0.000261982	Other	Other
oe = 0.83	8	106135416	106137636	+	Esrp2	0.844951	0.744583	0.00679595	Other	Other
oe = 0.74	15	75997023	75999500	+	Mapk15	0.753475	0.744544	0.035489	Other	Other
77157053..77157054	14	77156553	77157554	-	Enox1	1.45125	0.744477	0.00559554	Other	Other
107794450..107794452	11	107793950	107794952	-	Cacng4	0.177427	0.744466	0.0552029	Other	Other
oe = 0.83	15	70910540	70912034	+	null	-2.55762	0.744453	0.471094	Other	Other
152160353..152160355	4	152159853	152160855	+	Hes2	-0.157305	0.744243	0.0326154	Other	Other
57104698..57104706	14	57104198	57105206	-	Gjb2	-0.212302	0.744197	0.0978943	Other	Other
24526586..24526596	5	24526086	24527096	+	Gbx1	-0.103748	0.743916	0.0556486	Other	Other
oe = 1.80	17	33044128	33045689	+	null	-3.2038	0.743904	0.515978	Other	Other
oe = 0.64	12	113187155	113189671	+	Tmem121	1.11449	0.743741	0.0211174	Other	Other
84855913..84855917	15	84855413	84856417	+	Phf21b	1.15463	0.743476	0.00608196	Other	Other
121379044..121379048	14	121378544	121379548	-	Stk24	1.4679	0.743457	0.00315453	Other	Other
oe = 1.91	5	10621565	10623045	+	null	-3.21433	0.743419	0.413464	Other	Other
oe = 0.88	14	54463546	54465287	+	Lrp10	1.66561	0.743418	0.00226306	Other	Other
oe = 1.69	2	156709599	156711006	+	Dlgap4	-0.76603	0.743303	0.117289	Other	Other
oe = 0.93	5	53212433	53214255	+	Sel1l3	0.884636	0.743286	0.0161292	Other	Other
97935591..97935593	5	97935091	97936093	-	Antxr2	-1.20587	0.743255	0.226593	Other	Other
55520738..55520740	14	55520238	55521240	-	Nrl	-0.644154	0.742751	0.394515	Other	Other
oe = 0.65	1	150232001	150233743	+	null	-2.55895	0.742567	0.503436	Other	Other
oe = 0.70	17	32113198	32114683	+	null	-0.516298	0.742484	0.178109	Other	Other
oe = 0.64	X	55642552	55644060	+	null	-2.62762	0.742175	0.439296	Other	Other
oe = 0.84	5	33995240	33998186	+	Nat8l	2.21432	0.741812	5.88757e-05	Other	Other
25577737..25577738	2	25577237	25578238	-	Gm996	-0.150217	0.74158	0.0738556	Other	Other
oe = 0.69	10	16776954	16778487	+	null	-2.26569	0.741235	0.242289	Other	Other
97935478..97935481	5	97934978	97935981	+	Antxr2	-1.19646	0.740995	0.218341	Other	Other
55722098..55722104	14	55721598	55722604	-	Rabggta	0.847151	0.740977	0.0337247	Other	Other
154856135..154856141	4	154855635	154856641	-	Ttc34	0.465259	0.740709	0.0263479	Other	Other
154856248..154856253	4	154855748	154856753	-	Ttc34	0.497034	0.740643	0.0181153	Other	Other
78732934..78732934	14	78732434	78733434	+	null	0.310927	0.740569	0.235395	Other	Other
oe = 0.86	3	139563217	139564664	+	B930007M17Rik	-1.52303	0.740113	0.105385	Other	Other
70608237..70608241	8	70607737	70608741	+	Ssbp4	1.02527	0.739969	0.00314707	Other	Other
oe = 0.66	6	108271483	108273633	+	Itpr1	-2.08604	0.739965	0.386265	Other	Other
99126599..99126602	15	99126099	99127102	-	Spats2	1.35248	0.739938	0.000805908	Other	Other
154856205..154856210	4	154855705	154856710	-	Ttc34	0.478625	0.739824	0.0162487	Other	Other
154856130..154856133	4	154855630	154856633	+	Ttc34	0.464636	0.739775	0.0265418	Other	Other
73143216..73143220	14	73142716	73143720	+	Rcbtb2	1.31268	0.739618	0.00142447	Other	Other
99126213..99126214	15	99125713	99126714	-	Spats2	1.23814	0.739603	0.00204905	Other	Other
23350028..23350033	10	23349528	23350533	+	Eya4	0.209104	0.739545	0.0477329	Other	Other
51117636..51117640	18	51117136	51118140	+	Prr16	-0.630438	0.739515	0.124011	Other	Other
oe = 0.89	14	119098454	119100092	+	Uggt2	1.43768	0.739433	0.000661049	Other	Other
oe = 0.73	19	45150076	45152114	+	Tlx1	0.339403	0.739276	0.0148918	Other	Other
102012902..102012907	3	102012402	102013407	-	Nhlh2	-0.708621	0.739131	0.139674	Other	Other
oe = 0.81	7	28731982	28733408	+	Fbxo17	0.0243021	0.739001	0.0403525	Other	Other
47189411..47189413	14	47188911	47189913	-	Gch1	0.855403	0.738936	0.00983872	Other	Other
122486523..122486527	6	122486023	122487027	+	Rimklb	-0.294662	0.738935	0.0650814	Other	Other
oe = 1.77	11	75364007	75365451	+	Smyd4	-3.60276	0.738746	0.440755	Other	Other
120478710..120478717	14	120478210	120479217	+	Rap2a	1.68838	0.738699	0.000592963	Other	Other
154856230..154856236	4	154855730	154856736	-	Ttc34	0.495529	0.738385	0.0184384	Other	Other
oe = 0.90	9	8377061	8378573	+	null	-3.27443	0.738341	0.29643	Other	Other
99126548..99126559	15	99126048	99127059	+	Spats2	1.36114	0.738289	0.00128306	Other	Other
102819128..102819132	11	102818628	102819632	-	Gjc1	0.516377	0.738276	0.0398023	Other	Other
154856109..154856118	4	154855609	154856618	+	Ttc34	0.463573	0.73818	0.026871	Other	Other
154856112..154856115	4	154855612	154856615	-	Ttc34	0.463573	0.73818	0.026871	Other	Other
oe = 0.75	10	79734583	79736663	+	Hcn2	0.388869	0.738071	0.0345572	Other	Other
oe = 0.61	14	55761479	55763379	+	Ltb4r2	0.617143	0.738063	0.0648357	Other	Other
oe = 0.83	6	52316048	52317665	+	Evx1	-0.0884075	0.737972	0.153752	Other	Other
27142472..27142477	2	27141972	27142977	+	Fam163b	-0.16166	0.737844	0.150492	Other	Other
41220293..41220296	13	41219793	41220796	-	Elovl2	-0.0110025	0.737755	0.070944	Other	Other
33820624..33820629	5	33820124	33821129	-	Whsc1	1.2827	0.737671	0.00186113	Other	Other
oe = 0.85	2	159637443	159639299	+	null	-2.67185	0.737651	0.482532	Other	Other
49066476..49066483	14	49065976	49066983	-	Exoc5	1.50623	0.737517	0.000166288	Other	Other
120478710..120478716	14	120478210	120479216	-	Rap2a	1.68748	0.737343	0.000608396	Other	Other
64435790..64435792	11	64435290	64436292	-	AL646051.1	0.922222	0.737313	0.0110148	Other	Other
172940587..172940587	2	172940087	172941087	+	Bmp7	1.35895	0.737255	0.000973707	Other	Other
108826309..108826311	9	108825809	108826811	-	Celsr3	0.790233	0.73713	0.0385463	Other	Other
80758321..80758330	12	80757821	80758830	-	Gm1568	-1.01499	0.736852	0.246952	Other	Other
22344956..22344961	5	22344456	22345461	-	Reln	0.0477192	0.736828	0.0953995	Other	Other
42431839..42431847	19	42431339	42432347	+	Crtac1	-0.754274	0.736662	0.336313	Other	Other
118474000..118474004	14	118473500	118474504	-	null	0.605358	0.736385	0.0245982	Other	Other
121379168..121379176	14	121378668	121379676	+	Stk24	1.50384	0.736018	0.00535542	Other	Other
oe = 0.76	11	119057772	119059243	+	null	0.290803	0.735963	0.0561741	Other	Other
oe = 0.83	2	56068311	56069744	+	null	-2.29495	0.73564	0.304593	Other	Other
16811442..16811444	7	16810942	16811944	-	Fkrp	-0.496546	0.735486	0.289603	Other	Other
oe = 0.67	5	26379048	26381002	+	null	-3.70022	0.735441	0.22694	Other	Other
53068316..53068320	6	53067816	53068820	+	Jazf1	-0.381286	0.735385	0.0176218	Other	Other
38299888..38299891	15	38299388	38300391	-	Klf10	1.91039	0.735286	0.00449107	Other	Other
52191957..52191962	6	52191457	52192462	-	Gm20653	0.567578	0.735246	0.0212746	Other	Other
oe = 0.87	12	5616976	5618427	+	null	-1.93962	0.735099	0.291345	Other	Other
41220456..41220463	13	41219956	41220963	+	Elovl2	0.107037	0.735062	0.0539309	Other	Other
oe = 0.78	19	45142960	45144365	+	null	0.120922	0.73477	0.0341899	Other	Other
83779825..83779830	15	83779325	83780330	-	Mpped1	-1.61095	0.734746	0.40975	Other	Other
83779827..83779830	15	83779327	83780330	+	Mpped1	-1.61095	0.734746	0.40975	Other	Other
oe = 0.60	6	18899393	18900963	+	null	-1.67717	0.734741	0.28808	Other	Other
120478646..120478648	14	120478146	120479148	+	Rap2a	1.7851	0.734671	0.000167723	Other	Other
154856175..154856180	4	154855675	154856680	-	Ttc34	0.484367	0.734415	0.01612	Other	Other
122486442..122486445	6	122485942	122486945	+	Rimklb	-0.252608	0.734349	0.0696245	Other	Other
22344957..22344961	5	22344457	22345461	+	Reln	0.0458942	0.73409	0.0958384	Other	Other
oe = 0.63	6	60311657	60314238	+	null	-2.38206	0.73387	0.356791	Other	Other
118474024..118474028	14	118473524	118474528	-	null	0.603575	0.73371	0.0277427	Other	Other
41220321..41220326	13	41219821	41220826	-	Elovl2	-0.0137101	0.733694	0.0714672	Other	Other
122107509..122107511	14	122107009	122108011	+	Tm9sf2	1.28375	0.733479	0.00649613	Other	Other
oe = 0.97	15	77969941	77971705	+	Eif3d	2.08677	0.73317	0.00374338	Other	Other
77156935..77156939	14	77156435	77157439	+	Enox1	1.46341	0.733144	0.00480693	Other	Other
25577716..25577718	2	25577216	25578218	+	Gm996	-0.161932	0.733054	0.0924237	Other	Other
oe = 0.66	2	30255708	30257374	+	Lrrc8a	0.176661	0.732776	0.0553867	Other	Other
84585161..84585161	6	84584661	84585661	+	Cyp26b1	-0.0882485	0.732718	0.0327021	Other	Other
oe = 0.84	2	73272354	73275415	+	Sp9	1.90707	0.732346	0.00121397	Other	Other
120581345..120581347	11	120580845	120581847	+	Arhgdia	1.10832	0.732203	0.00575538	Other	Other
172940509..172940514	2	172940009	172941014	+	Bmp7	1.40542	0.732039	0.00138805	Other	Other
oe = 0.78	2	25576522	25580408	+	Gm996	1.48233	0.732028	0.00772183	Other	Other
102818980..102818985	11	102818480	102819485	+	Gjc1	0.42531	0.731882	0.0674689	Other	Other
18587058..18587068	16	18586558	18587568	-	Tbx1	-0.620137	0.731817	0.276506	Other	Other
24526322..24526325	5	24525822	24526825	+	Gbx1	-0.285234	0.731641	0.117835	Other	Other
33464110..33464111	18	33463610	33464611	-	D0H4S114	1.4954	0.731535	0.00231328	Other	Other
oe = 0.77	2	14376115	14377664	+	null	-2.17678	0.731495	0.38718	Other	Other
oe = 0.92	14	65836737	65838329	+	Ccdc25	1.20818	0.731392	0.00192038	Other	Other
oe = 0.68	1	56097959	56099698	+	null	-2.65848	0.731236	0.443283	Other	Other
87732779..87732781	6	87732279	87733281	+	Ccdc48	-0.827233	0.731225	0.0673931	Other	Other
24526602..24526607	5	24526102	24527107	-	Gbx1	-0.112233	0.731188	0.0581671	Other	Other
172043052..172043056	2	172042552	172043556	-	Cbln4	-0.167353	0.731129	0.0844033	Other	Other
129985033..129985042	4	129984533	129985542	+	Bai2	0.117344	0.730864	0.0935876	Other	Other
46883079..46883084	14	46882579	46883584	-	Samd4	1.62901	0.730449	0.000954311	Other	Other
166940257..166940257	1	166939757	166940757	+	null	-0.473464	0.730396	0.348835	Other	Other
[truncated: 46,556 more rows]
