# Supplementary material for: NF1 regulates mesenchymal glioblastoma plasticity and aggressiveness through the AP-1 transcription factor FOSL1
Source: eLife. 2021 Aug 17;10:e64846. doi: 10.7554/eLife.64846 (PMC8370767; doi:10.7554/eLife.64846)
Supplement: Figure 5—source data 2. [file elife-64846-fig5-data2.xlsx]

## Sheet: Figure_5A
# Source_Data_Figure_5A
Sample	day	value
sgCtrl	d1	0.079
sgCtrl	d1	0.075
sgCtrl	d1	0.077
sgCtrl	d1	0.074
sgCtrl	d1	0.075
sgCtrl	d1	0.079
sgCtrl	d1	0.07
sgCtrl	d1	0.073
sgCtrl	d1	0.076
sgCtrl	d1	0.076
sgCtrl	d3	0.202
sgCtrl	d3	0.181
sgCtrl	d3	0.17
sgCtrl	d3	0.185
sgCtrl	d3	0.166
sgCtrl	d3	0.174
sgCtrl	d3	0.155
sgCtrl	d3	0.18
sgCtrl	d3	0.175
sgCtrl	d3	0.171
sgCtrl	d5	1.143
sgCtrl	d5	1.126
sgCtrl	d5	1.12
sgCtrl	d5	1.065
sgCtrl	d5	1.253
sgCtrl	d5	1.108
sgCtrl	d5	1.021
sgCtrl	d5	1.078
sgCtrl	d5	1.047
sgCtrl	d5	1.146
sgCtrl	d7	1.694
sgCtrl	d7	1.952
sgCtrl	d7	1.843
sgCtrl	d7	1.999
sgCtrl	d7	1.819
sgCtrl	d7	1.935
sgCtrl	d7	1.843
sgCtrl	d7	1.831
sgCtrl	d7	1.711
sgCtrl	d7	1.741
sgFosl1_1	d1	0.109
sgFosl1_1	d1	0.106
sgFosl1_1	d1	0.105
sgFosl1_1	d1	0.106
sgFosl1_1	d1	0.104
sgFosl1_1	d1	0.105
sgFosl1_1	d1	0.103
sgFosl1_1	d1	0.107
sgFosl1_1	d1	0.104
sgFosl1_1	d1	0.11
sgFosl1_1	d3	0.281
sgFosl1_1	d3	0.256
sgFosl1_1	d3	0.243
sgFosl1_1	d3	0.259
sgFosl1_1	d3	0.259
sgFosl1_1	d3	0.267
sgFosl1_1	d3	0.256
sgFosl1_1	d3	0.268
sgFosl1_1	d3	0.275
sgFosl1_1	d3	0.254
sgFosl1_1	d5	1.2
sgFosl1_1	d5	1.205
sgFosl1_1	d5	1.214
sgFosl1_1	d5	1.193
sgFosl1_1	d5	1.306
sgFosl1_1	d5	1.081
sgFosl1_1	d5	1.198
sgFosl1_1	d5	1.246
sgFosl1_1	d5	1.205
sgFosl1_1	d5	1.235
sgFosl1_1	d7	1.994
sgFosl1_1	d7	1.899
sgFosl1_1	d7	1.92
sgFosl1_1	d7	1.854
sgFosl1_1	d7	2.069
sgFosl1_1	d7	1.942
sgFosl1_1	d7	2.086
sgFosl1_1	d7	1.934
sgFosl1_1	d7	2.045
sgFosl1_1	d7	1.844
sgFosl1_3	d1	0.113
sgFosl1_3	d1	0.109
sgFosl1_3	d1	0.125
sgFosl1_3	d1	0.117
sgFosl1_3	d1	0.112
sgFosl1_3	d1	0.129
sgFosl1_3	d1	0.114
sgFosl1_3	d1	0.113
sgFosl1_3	d1	0.117
sgFosl1_3	d1	0.117
sgFosl1_3	d3	0.347
sgFosl1_3	d3	0.327
sgFosl1_3	d3	0.342
sgFosl1_3	d3	0.343
sgFosl1_3	d3	0.34
sgFosl1_3	d3	0.351
sgFosl1_3	d3	0.326
sgFosl1_3	d3	0.332
sgFosl1_3	d3	0.339
sgFosl1_3	d3	0.336
sgFosl1_3	d5	1.47
sgFosl1_3	d5	1.591
sgFosl1_3	d5	1.482
sgFosl1_3	d5	1.701
sgFosl1_3	d5	1.726
sgFosl1_3	d5	1.593
sgFosl1_3	d5	1.71
sgFosl1_3	d5	1.617
sgFosl1_3	d5	1.586
sgFosl1_3	d5	1.58
sgFosl1_3	d7	2.092
sgFosl1_3	d7	2.144
sgFosl1_3	d7	1.878
sgFosl1_3	d7	2.078
sgFosl1_3	d7	2.105
sgFosl1_3	d7	2.104
sgFosl1_3	d7	2.239
sgFosl1_3	d7	2.251
sgFosl1_3	d7	2.062
sgFosl1_3	d7	2.335

## Sheet: Figure_5B
# Source_Data_Figure_5B
Sample	Phase	Percentage
sgCtrl	G1	37
sgCtrl	G1	37.7
sgCtrl	G1	37.9
sgCtrl	S	43.2
sgCtrl	S	43.6
sgCtrl	S	41
sgCtrl	G2	11.2
sgCtrl	G2	11.1
sgCtrl	G2	12.9
sgFosl1_1	G1	41.1
sgFosl1_1	G1	40.8
sgFosl1_1	G1	40.4
sgFosl1_1	S	21.4
sgFosl1_1	S	22.1
sgFosl1_1	S	21.2
sgFosl1_1	G2	27.8
sgFosl1_1	G2	28.6
sgFosl1_1	G2	28.9
sgFosl1_3	G1	45.8
sgFosl1_3	G1	44
sgFosl1_3	G1	47.1
sgFosl1_3	S	15.7
sgFosl1_3	S	27
sgFosl1_3	S	18.6
sgFosl1_3	G2	27.5
sgFosl1_3	G2	18.5
sgFosl1_3	G2	24.2

## Sheet: Figure_5C
# Source_Data_Figure_5C
Group	Dose	Tested	Response
sgCtrl	20	31	31
sgCtrl	15	32	31
sgCtrl	5	43	37
sgCtrl	2	46	22
sgFosl_1	20	31	18
sgFosl_1	15	39	13
sgFosl_1	5	42	9
sgFosl_1	2	45	1

## Sheet: Figure_5E
# Source_Data_Figure_5E
sgRNA	Marker	norm_value
sgCtrl	GFAP	1.90162
sgCtrl	GFAP	0.189114
sgCtrl	GFAP	1.14598
sgCtrl	GFAP	0.48696
sgCtrl	GFAP	0.0981838
sgCtrl	GFAP	0.964997
sgCtrl	GFAP	0.0572998
sgCtrl	GFAP	0.160225
sgCtrl	GFAP	0.0729973
sgCtrl	GFAP	0.0291275
sgCtrl	GFAP	0.0118301
sgCtrl	GFAP	0.413871
sgCtrl	GFAP	0.276722
sgCtrl	GFAP	1.60421
sgCtrl	GFAP	4.42171
sgCtrl	GFAP	0.235573
sgCtrl	GFAP	0.0133262
sgCtrl	GFAP	0.0171923
sgCtrl	GFAP	1.05691
sgCtrl	GFAP	0.165179
sgCtrl	GFAP	0.153897
sgCtrl	GFAP	0.0703279
sgCtrl	GFAP	0.156731
sgCtrl	GFAP	0.623949
sgCtrl	GFAP	0.0151891
sgCtrl	GFAP	0.871871
sgCtrl	GFAP	0.0713543
sgCtrl	GFAP	0.295979
sgCtrl	GFAP	0.048456
sgCtrl	GFAP	0.0467658
sgCtrl	GFAP	0.480471
sgCtrl	GFAP	0.156367
sgCtrl	GFAP	1.7876
sgCtrl	GFAP	2.34614
sgCtrl	GFAP	13.8121
sgCtrl	GFAP	1.73979
sgFosl1_1	GFAP	9.4347
sgFosl1_1	GFAP	7.49393
sgFosl1_1	GFAP	12.6526
sgFosl1_1	GFAP	13.8973
sgFosl1_1	GFAP	12.6817
sgFosl1_1	GFAP	3.70912
sgFosl1_1	GFAP	5.16724
sgFosl1_1	GFAP	6.5009
sgFosl1_1	GFAP	12.6208
sgFosl1_1	GFAP	14.1387
sgFosl1_1	GFAP	13.7106
sgFosl1_1	GFAP	8.20509
sgFosl1_1	GFAP	22.3159
sgFosl1_1	GFAP	20.0496
sgFosl1_1	GFAP	10.9244
sgFosl1_1	GFAP	8.7785
sgFosl1_1	GFAP	5.15083
sgFosl1_1	GFAP	5.62487
sgFosl1_1	GFAP	4.24111
sgFosl1_1	GFAP	3.93608
sgFosl1_1	GFAP	6.78912
sgFosl1_1	GFAP	7.2784
sgFosl1_1	GFAP	18.1385
sgFosl1_1	GFAP	20.046
sgFosl1_1	GFAP	29.6133
sgFosl1_1	GFAP	21.5107
sgFosl1_1	GFAP	12.4281
sgFosl1_1	GFAP	7.2278
sgFosl1_1	GFAP	2.11816
sgFosl1_1	GFAP	15.7371
sgFosl1_1	GFAP	8.11182
sgFosl1_1	GFAP	4.47079
sgFosl1_1	GFAP	10.3417
sgFosl1_1	GFAP	15.3159
sgFosl1_1	GFAP	19.4209
sgFosl1_1	GFAP	15.8195
sgFosl1_3	GFAP	29.9631
sgFosl1_3	GFAP	25.3137
sgFosl1_3	GFAP	36.0087
sgFosl1_3	GFAP	26.8284
sgFosl1_3	GFAP	31.4016
sgFosl1_3	GFAP	40.606
sgFosl1_3	GFAP	35.066
sgFosl1_3	GFAP	35.1257
sgFosl1_3	GFAP	32.8995
sgFosl1_3	GFAP	37.1339
sgFosl1_3	GFAP	38.4569
sgFosl1_3	GFAP	44.7887
sgFosl1_3	GFAP	38.4312
sgFosl1_3	GFAP	30.3486
sgFosl1_3	GFAP	44.3413
sgFosl1_3	GFAP	37.6477
sgFosl1_3	GFAP	42.5877
sgFosl1_3	GFAP	37.2874
sgFosl1_3	GFAP	47.5295
sgFosl1_3	GFAP	47.2825
sgFosl1_3	GFAP	46.0567
sgFosl1_3	GFAP	37.5067
sgFosl1_3	GFAP	45.1405
sgFosl1_3	GFAP	38.7897
sgFosl1_3	GFAP	54.0568
sgFosl1_3	GFAP	39.5892
sgFosl1_3	GFAP	43.6253
sgFosl1_3	GFAP	46.2968
sgFosl1_3	GFAP	48.8945
sgFosl1_3	GFAP	29.961
sgFosl1_3	GFAP	35.2152
sgFosl1_3	GFAP	41.0737
sgFosl1_3	GFAP	47.5677
sgFosl1_3	GFAP	45.2014
sgFosl1_3	GFAP	58.9552
sgFosl1_3	GFAP	45.2928
sgCtrl	CD44	0.580049
sgCtrl	CD44	1.03723
sgCtrl	CD44	1.04677
sgCtrl	CD44	0.992133
sgCtrl	CD44	1.11259
sgCtrl	CD44	1.04016
sgCtrl	CD44	0.885608
sgCtrl	CD44	0.992349
sgCtrl	CD44	0.975423
sgCtrl	CD44	1.00202
sgCtrl	CD44	1.05655
sgCtrl	CD44	0.889249
sgCtrl	CD44	1.12869
sgCtrl	CD44	1.03369
sgCtrl	CD44	0.901122
sgCtrl	CD44	1.08245
sgCtrl	CD44	0.832734
sgCtrl	CD44	1.02969
sgCtrl	CD44	0.899867
sgCtrl	CD44	1.06986
sgCtrl	CD44	1.16445
sgCtrl	CD44	1.16446
sgCtrl	CD44	1.18849
sgCtrl	CD44	0.9997
sgCtrl	CD44	0.817882
sgCtrl	CD44	0.588098
sgCtrl	CD44	0.928774
sgCtrl	CD44	0.917485
sgCtrl	CD44	1.18023
sgCtrl	CD44	0.985102
sgCtrl	CD44	1.26824
sgCtrl	CD44	1.31345
sgCtrl	CD44	1.25242
sgCtrl	CD44	1.1521
sgCtrl	CD44	0.594524
sgCtrl	CD44	0.896361
sgFosl1_1	CD44	0.280263
sgFosl1_1	CD44	0.360275
sgFosl1_1	CD44	0.190935
sgFosl1_1	CD44	0.141428
sgFosl1_1	CD44	0.0991265
sgFosl1_1	CD44	0.0900885
sgFosl1_1	CD44	0.142342
sgFosl1_1	CD44	0.114787
sgFosl1_1	CD44	0.170041
sgFosl1_1	CD44	0.190276
sgFosl1_1	CD44	0.19576
sgFosl1_1	CD44	0.256464
sgFosl1_1	CD44	0.179073
sgFosl1_1	CD44	0.173468
sgFosl1_1	CD44	0.141619
sgFosl1_1	CD44	0.112942
sgFosl1_1	CD44	0.135196
sgFosl1_1	CD44	0.0851681
sgFosl1_1	CD44	0.18587
sgFosl1_1	CD44	0.281498
sgFosl1_1	CD44	0.151327
sgFosl1_1	CD44	0.167574
sgFosl1_1	CD44	0.202805
sgFosl1_1	CD44	0.181489
sgFosl1_1	CD44	0.210817
sgFosl1_1	CD44	0.245614
sgFosl1_1	CD44	0.180612
sgFosl1_1	CD44	0.162248
sgFosl1_1	CD44	0.262672
sgFosl1_1	CD44	0.143207
sgFosl1_1	CD44	0.112687
sgFosl1_1	CD44	0.0763335
sgFosl1_1	CD44	0.175576
sgFosl1_1	CD44	0.196609
sgFosl1_1	CD44	0.299864
sgFosl1_1	CD44	0.308868
sgFosl1_3	CD44	0.206019
sgFosl1_3	CD44	0.343551
sgFosl1_3	CD44	0.492027
sgFosl1_3	CD44	0.422709
sgFosl1_3	CD44	0.431945
sgFosl1_3	CD44	0.374678
sgFosl1_3	CD44	0.233997
sgFosl1_3	CD44	0.143906
sgFosl1_3	CD44	0.387751
sgFosl1_3	CD44	0.609101
sgFosl1_3	CD44	0.921127
sgFosl1_3	CD44	0.191134
sgFosl1_3	CD44	0.263088
sgFosl1_3	CD44	0.628529
sgFosl1_3	CD44	0.296357
sgFosl1_3	CD44	0.328808
sgFosl1_3	CD44	0.144144
sgFosl1_3	CD44	0.473141
sgFosl1_3	CD44	0.301103
sgFosl1_3	CD44	0.532126
sgFosl1_3	CD44	0.17625
sgFosl1_3	CD44	0.219381
sgFosl1_3	CD44	0.158677
sgFosl1_3	CD44	0.293852
sgFosl1_3	CD44	0.265275
sgFosl1_3	CD44	0.244191
sgFosl1_3	CD44	0.117235
sgFosl1_3	CD44	0.43458
sgFosl1_3	CD44	0.59225
sgFosl1_3	CD44	0.243459
sgFosl1_3	CD44	0.423696
sgFosl1_3	CD44	0.369025
sgFosl1_3	CD44	0.202452
sgFosl1_3	CD44	0.172027
sgFosl1_3	CD44	0.249902
sgFosl1_3	CD44	0.157394
sgCtrl	OLIG2	0.472656
sgCtrl	OLIG2	0.894594
sgCtrl	OLIG2	1.21216
sgCtrl	OLIG2	0.729183
sgCtrl	OLIG2	1.60853
sgCtrl	OLIG2	0.800322
sgCtrl	OLIG2	1.54331
sgCtrl	OLIG2	0.906704
sgCtrl	OLIG2	0.843115
sgCtrl	OLIG2	1.13229
sgCtrl	OLIG2	0.828898
sgCtrl	OLIG2	0.999978
sgCtrl	OLIG2	0.914516
sgCtrl	OLIG2	1.02844
sgCtrl	OLIG2	1.28365
sgCtrl	OLIG2	1.29596
sgCtrl	OLIG2	0.822867
sgCtrl	OLIG2	1.62424
sgCtrl	OLIG2	0.756068
sgCtrl	OLIG2	0.836408
sgCtrl	OLIG2	1.46432
sgCtrl	OLIG2	1.14328
sgCtrl	OLIG2	0.819153
sgCtrl	OLIG2	1.01366
sgCtrl	OLIG2	0.798448
sgCtrl	OLIG2	0.752365
sgCtrl	OLIG2	1.07986
sgCtrl	OLIG2	1.20494
sgCtrl	OLIG2	0.742078
sgCtrl	OLIG2	0.442747
sgCtrl	OLIG2	1.08612
sgCtrl	OLIG2	0.904248
sgCtrl	OLIG2	1.33792
sgCtrl	OLIG2	1.09019
sgCtrl	OLIG2	1.02816
sgCtrl	OLIG2	0.558613
sgFosl1_1	OLIG2	2.68335
sgFosl1_1	OLIG2	2.35304
sgFosl1_1	OLIG2	2.53465
sgFosl1_1	OLIG2	2.34341
sgFosl1_1	OLIG2	2.067
sgFosl1_1	OLIG2	2.35083
sgFosl1_1	OLIG2	2.47251
sgFosl1_1	OLIG2	2.7885
sgFosl1_1	OLIG2	1.37265
sgFosl1_1	OLIG2	2.26256
sgFosl1_1	OLIG2	2.2976
sgFosl1_1	OLIG2	2.84655
sgFosl1_1	OLIG2	2.1934
sgFosl1_1	OLIG2	2.34462
sgFosl1_1	OLIG2	2.71859
sgFosl1_1	OLIG2	2.31586
sgFosl1_1	OLIG2	2.53963
sgFosl1_1	OLIG2	2.49513
sgFosl1_1	OLIG2	2.68683
sgFosl1_1	OLIG2	3.35895
sgFosl1_1	OLIG2	1.8098
sgFosl1_1	OLIG2	2.05993
sgFosl1_1	OLIG2	2.11426
sgFosl1_1	OLIG2	2.46182
sgFosl1_1	OLIG2	2.23506
sgFosl1_1	OLIG2	1.75887
sgFosl1_1	OLIG2	1.39707
sgFosl1_1	OLIG2	2.30866
sgFosl1_1	OLIG2	2.71097
sgFosl1_1	OLIG2	2.20992
sgFosl1_1	OLIG2	2.49157
sgFosl1_1	OLIG2	2.588
sgFosl1_1	OLIG2	2.94242
sgFosl1_1	OLIG2	1.98349
sgFosl1_1	OLIG2	3.4531
sgFosl1_1	OLIG2	2.16268
sgFosl1_3	OLIG2	2.61613
sgFosl1_3	OLIG2	1.80622
sgFosl1_3	OLIG2	1.3751
sgFosl1_3	OLIG2	1.32726
sgFosl1_3	OLIG2	1.52372
sgFosl1_3	OLIG2	1.30518
sgFosl1_3	OLIG2	1.93342
sgFosl1_3	OLIG2	1.66174
sgFosl1_3	OLIG2	0.929551
sgFosl1_3	OLIG2	0.817194
sgFosl1_3	OLIG2	2.49164
sgFosl1_3	OLIG2	2.00727
sgFosl1_3	OLIG2	1.12637
sgFosl1_3	OLIG2	1.65699
sgFosl1_3	OLIG2	2.04881
sgFosl1_3	OLIG2	2.08636
sgFosl1_3	OLIG2	1.64917
sgFosl1_3	OLIG2	2.16146
sgFosl1_3	OLIG2	1.4792
sgFosl1_3	OLIG2	1.29901
sgFosl1_3	OLIG2	2.08273
sgFosl1_3	OLIG2	1.81558
sgFosl1_3	OLIG2	1.68716
sgFosl1_3	OLIG2	1.75988
sgFosl1_3	OLIG2	2.66222
sgFosl1_3	OLIG2	2.69261
sgFosl1_3	OLIG2	1.87429
sgFosl1_3	OLIG2	2.18483
sgFosl1_3	OLIG2	2.09819
sgFosl1_3	OLIG2	2.49803
sgFosl1_3	OLIG2	1.88844
sgFosl1_3	OLIG2	1.92951
sgFosl1_3	OLIG2	2.84713
sgFosl1_3	OLIG2	2.48582
sgFosl1_3	OLIG2	2.63148
sgFosl1_3	OLIG2	2.44232

## Sheet: Figure_5F
# Source_Data_Figure_5F
Mouse_ID	days	group	status	gender
KCN00576	31	sgCtrl	1	female
KCN00583	40	sgCtrl	1	male
KCN00584	37	sgCtrl	1	female
KCN00585	31	sgFra1_1	1	female
KCN00590	46	sgFra1_1	1	male
KCN00592	37	sgCtrl	1	male
KCN00593	49	sgCtrl	1	female
KCN00605	37	sgCtrl	1	female
KCN00606	55	sgCtrl	1	female
KCN00624	37	sgCtrl	1	female
KCN00625	44	sgCtrl	1	female
KCN00604	50	sgFra1_1	1	female
KCN00611	59	sgFra1_1	1	female
KCN00612	62	sgFra1_1	1	female
KCN00613	69	sgFra1_1	1	female

## Sheet: Figure_5I
# Source_Data_Figure_5I
Cells	Sample	Replicate	Normalizer	Gene	CT
KSS49_7_KrasG12V	sgCtrl-T4	Rep1	Gapdh	Gapdh	16.037
KSS49_7_KrasG12V	sgCtrl-T4	Rep2	Gapdh	Gapdh	15.951
KSS49_7_KrasG12V	sgCtrl-T4	Rep3	Gapdh	Gapdh	16.007
KSS49_7_KrasG12V	sgCtrl-T4	Rep1	Gapdh	Plau	20.757
KSS49_7_KrasG12V	sgCtrl-T4	Rep2	Gapdh	Plau	20.547
KSS49_7_KrasG12V	sgCtrl-T4	Rep3	Gapdh	Plau	20.527
KSS49_7_KrasG12V	sgCtrl-T4	Rep1	Gapdh	Itga7	22.221
KSS49_7_KrasG12V	sgCtrl-T4	Rep2	Gapdh	Itga7	22.073
KSS49_7_KrasG12V	sgCtrl-T4	Rep3	Gapdh	Itga7	22.175
KSS49_7_KrasG12V	sgCtrl-T4	Rep1	Gapdh	Timp1	19.957
KSS49_7_KrasG12V	sgCtrl-T4	Rep2	Gapdh	Timp1	20.017
KSS49_7_KrasG12V	sgCtrl-T4	Rep3	Gapdh	Timp1	20.036
KSS49_7_KrasG12V	sgCtrl-T4	Rep1	Gapdh	Plaur	21.233
KSS49_7_KrasG12V	sgCtrl-T4	Rep2	Gapdh	Plaur	21.298
KSS49_7_KrasG12V	sgCtrl-T4	Rep3	Gapdh	Plaur	21.455
KSS49_7_KrasG12V	sgCtrl-T4	Rep1	Gapdh	Fn1	18.983
KSS49_7_KrasG12V	sgCtrl-T4	Rep2	Gapdh	Fn1	19.318
KSS49_7_KrasG12V	sgCtrl-T4	Rep3	Gapdh	Fn1	19.077
KSS49_7_KrasG12V	sgCtrl-T4	Rep1	Gapdh	Cyr61	20.415
KSS49_7_KrasG12V	sgCtrl-T4	Rep2	Gapdh	Cyr61	20.306
KSS49_7_KrasG12V	sgCtrl-T4	Rep3	Gapdh	Cyr61	20.438
KSS49_7_KrasG12V	sgCtrl-T4	Rep1	Gapdh	Actn1	20.172
KSS49_7_KrasG12V	sgCtrl-T4	Rep2	Gapdh	Actn1	20.166
KSS49_7_KrasG12V	sgCtrl-T4	Rep3	Gapdh	Actn1	20.212
KSS49_7_KrasG12V	sgCtrl-T4	Rep1	Gapdh	S100a4	21.766
KSS49_7_KrasG12V	sgCtrl-T4	Rep2	Gapdh	S100a4	21.718
KSS49_7_KrasG12V	sgCtrl-T4	Rep3	Gapdh	S100a4	21.751
KSS49_7_KrasG12V	sgCtrl-T4	Rep1	Gapdh	Vim	17.922
KSS49_7_KrasG12V	sgCtrl-T4	Rep2	Gapdh	Vim	18.048
KSS49_7_KrasG12V	sgCtrl-T4	Rep3	Gapdh	Vim	17.86
KSS49_7_KrasG12V	sgCtrl-T4	Rep1	Gapdh	Cd44	20.307
KSS49_7_KrasG12V	sgCtrl-T4	Rep2	Gapdh	Cd44	20.541
KSS49_7_KrasG12V	sgCtrl-T4	Rep3	Gapdh	Cd44	20.402
KSS49_7_KrasG12V	sgFosl1-T3	Rep1	Gapdh	Gapdh	15.992
KSS49_7_KrasG12V	sgFosl1-T3	Rep2	Gapdh	Gapdh	15.997
KSS49_7_KrasG12V	sgFosl1-T3	Rep3	Gapdh	Gapdh	15.751
KSS49_7_KrasG12V	sgFosl1-T3	Rep1	Gapdh	Plau	21.25
KSS49_7_KrasG12V	sgFosl1-T3	Rep2	Gapdh	Plau	21.308
KSS49_7_KrasG12V	sgFosl1-T3	Rep3	Gapdh	Plau	21.271
KSS49_7_KrasG12V	sgFosl1-T3	Rep1	Gapdh	Itga7	23.407
KSS49_7_KrasG12V	sgFosl1-T3	Rep2	Gapdh	Itga7	23.626
KSS49_7_KrasG12V	sgFosl1-T3	Rep3	Gapdh	Itga7	23.289
KSS49_7_KrasG12V	sgFosl1-T3	Rep1	Gapdh	Timp1	20.225
KSS49_7_KrasG12V	sgFosl1-T3	Rep2	Gapdh	Timp1	20.354
KSS49_7_KrasG12V	sgFosl1-T3	Rep3	Gapdh	Timp1	20.261
KSS49_7_KrasG12V	sgFosl1-T3	Rep1	Gapdh	Plaur	22.003
KSS49_7_KrasG12V	sgFosl1-T3	Rep2	Gapdh	Plaur	21.591
KSS49_7_KrasG12V	sgFosl1-T3	Rep3	Gapdh	Plaur	21.648
KSS49_7_KrasG12V	sgFosl1-T3	Rep1	Gapdh	Fn1	19.637
KSS49_7_KrasG12V	sgFosl1-T3	Rep2	Gapdh	Fn1	19.699
KSS49_7_KrasG12V	sgFosl1-T3	Rep3	Gapdh	Fn1	19.786
KSS49_7_KrasG12V	sgFosl1-T3	Rep1	Gapdh	Cyr61	20.079
KSS49_7_KrasG12V	sgFosl1-T3	Rep2	Gapdh	Cyr61	20.416
KSS49_7_KrasG12V	sgFosl1-T3	Rep3	Gapdh	Cyr61	20.166
KSS49_7_KrasG12V	sgFosl1-T3	Rep1	Gapdh	Actn1	20.525
KSS49_7_KrasG12V	sgFosl1-T3	Rep2	Gapdh	Actn1	20.396
KSS49_7_KrasG12V	sgFosl1-T3	Rep3	Gapdh	Actn1	20.464
KSS49_7_KrasG12V	sgFosl1-T3	Rep1	Gapdh	S100a4	23.677
KSS49_7_KrasG12V	sgFosl1-T3	Rep2	Gapdh	S100a4	23.697
KSS49_7_KrasG12V	sgFosl1-T3	Rep3	Gapdh	S100a4	23.686
KSS49_7_KrasG12V	sgFosl1-T3	Rep1	Gapdh	Vim	18.144
KSS49_7_KrasG12V	sgFosl1-T3	Rep2	Gapdh	Vim	17.775
KSS49_7_KrasG12V	sgFosl1-T3	Rep3	Gapdh	Vim	18.015
KSS49_7_KrasG12V	sgFosl1-T3	Rep1	Gapdh	Cd44	20.809
KSS49_7_KrasG12V	sgFosl1-T3	Rep2	Gapdh	Cd44	21.21
KSS49_7_KrasG12V	sgFosl1-T3	Rep3	Gapdh	Cd44	20.51
KSS49_7_KrasG12V	sgFosl1-T4	Rep1	Gapdh	Gapdh	15.98
KSS49_7_KrasG12V	sgFosl1-T4	Rep2	Gapdh	Gapdh	15.884
KSS49_7_KrasG12V	sgFosl1-T4	Rep3	Gapdh	Gapdh	15.851
KSS49_7_KrasG12V	sgFosl1-T4	Rep1	Gapdh	Plau	22.995
KSS49_7_KrasG12V	sgFosl1-T4	Rep2	Gapdh	Plau	23.085
KSS49_7_KrasG12V	sgFosl1-T4	Rep3	Gapdh	Plau	23.089
KSS49_7_KrasG12V	sgFosl1-T4	Rep1	Gapdh	Itga7	25.035
KSS49_7_KrasG12V	sgFosl1-T4	Rep2	Gapdh	Itga7	24.748
KSS49_7_KrasG12V	sgFosl1-T4	Rep3	Gapdh	Itga7	24.767
KSS49_7_KrasG12V	sgFosl1-T4	Rep1	Gapdh	Timp1	20.975
KSS49_7_KrasG12V	sgFosl1-T4	Rep2	Gapdh	Timp1	21.103
KSS49_7_KrasG12V	sgFosl1-T4	Rep3	Gapdh	Timp1	20.976
KSS49_7_KrasG12V	sgFosl1-T4	Rep1	Gapdh	Plaur	22.405
KSS49_7_KrasG12V	sgFosl1-T4	Rep2	Gapdh	Plaur	22.446
KSS49_7_KrasG12V	sgFosl1-T4	Rep3	Gapdh	Plaur	22.349
KSS49_7_KrasG12V	sgFosl1-T4	Rep1	Gapdh	Fn1	20.271
KSS49_7_KrasG12V	sgFosl1-T4	Rep2	Gapdh	Fn1	20.292
KSS49_7_KrasG12V	sgFosl1-T4	Rep3	Gapdh	Fn1	20.411
KSS49_7_KrasG12V	sgFosl1-T4	Rep1	Gapdh	Cyr61	21.699
KSS49_7_KrasG12V	sgFosl1-T4	Rep2	Gapdh	Cyr61	21.599
KSS49_7_KrasG12V	sgFosl1-T4	Rep3	Gapdh	Cyr61	21.563
KSS49_7_KrasG12V	sgFosl1-T4	Rep1	Gapdh	Actn1	20.814
KSS49_7_KrasG12V	sgFosl1-T4	Rep2	Gapdh	Actn1	20.783
KSS49_7_KrasG12V	sgFosl1-T4	Rep3	Gapdh	Actn1	20.837
KSS49_7_KrasG12V	sgFosl1-T4	Rep1	Gapdh	S100a4	25.704
KSS49_7_KrasG12V	sgFosl1-T4	Rep2	Gapdh	S100a4	25.78
KSS49_7_KrasG12V	sgFosl1-T4	Rep3	Gapdh	S100a4	25.82
KSS49_7_KrasG12V	sgFosl1-T4	Rep1	Gapdh	Vim	18.744
KSS49_7_KrasG12V	sgFosl1-T4	Rep2	Gapdh	Vim	18.656
KSS49_7_KrasG12V	sgFosl1-T4	Rep3	Gapdh	Vim	18.745
KSS49_7_KrasG12V	sgFosl1-T4	Rep1	Gapdh	Cd44	21.775
KSS49_7_KrasG12V	sgFosl1-T4	Rep2	Gapdh	Cd44	21.899
KSS49_7_KrasG12V	sgFosl1-T4	Rep3	Gapdh	Cd44	21.672

## Sheet: Figure_5J
# Source_Data_Figure_5J
Cells	Sample	Replicate	Normalizer	Gene	CT
KSS49_7_KrasG12V	sgCtrl-T4	Rep1	Gapdh	Gapdh	16.009
KSS49_7_KrasG12V	sgCtrl-T4	Rep2	Gapdh	Gapdh	15.99
KSS49_7_KrasG12V	sgCtrl-T4	Rep3	Gapdh	Gapdh	16.096
KSS49_7_KrasG12V	sgCtrl-T4	Rep1	Gapdh	Olig2	29.772
KSS49_7_KrasG12V	sgCtrl-T4	Rep2	Gapdh	Olig2	30.323
KSS49_7_KrasG12V	sgCtrl-T4	Rep3	Gapdh	Olig2	26.661
KSS49_7_KrasG12V	sgCtrl-T4	Rep1	Gapdh	Ncam1	26.955
KSS49_7_KrasG12V	sgCtrl-T4	Rep2	Gapdh	Ncam1	29.394
KSS49_7_KrasG12V	sgCtrl-T4	Rep3	Gapdh	Ncam1	28.731
KSS49_7_KrasG12V	sgCtrl-T4	Rep1	Gapdh	Dll3	32.399
KSS49_7_KrasG12V	sgCtrl-T4	Rep2	Gapdh	Dll3	33.885
KSS49_7_KrasG12V	sgCtrl-T4	Rep3	Gapdh	Dll3	34.881
KSS49_7_KrasG12V	sgCtrl-T4	Rep1	Gapdh	Lgr5	28.859
KSS49_7_KrasG12V	sgCtrl-T4	Rep2	Gapdh	Lgr5	29.106
KSS49_7_KrasG12V	sgCtrl-T4	Rep3	Gapdh	Lgr5	29.086
KSS49_7_KrasG12V	sgCtrl-T4	Rep1	Gapdh	Bcan	28.045
KSS49_7_KrasG12V	sgCtrl-T4	Rep2	Gapdh	Bcan	28.195
KSS49_7_KrasG12V	sgCtrl-T4	Rep3	Gapdh	Bcan	28.225
KSS49_7_KrasG12V	sgFosl1-T3	Rep1	Gapdh	Gapdh	15.991
KSS49_7_KrasG12V	sgFosl1-T3	Rep2	Gapdh	Gapdh	15.975
KSS49_7_KrasG12V	sgFosl1-T3	Rep3	Gapdh	Gapdh	15.93
KSS49_7_KrasG12V	sgFosl1-T3	Rep1	Gapdh	Olig2	27.384
KSS49_7_KrasG12V	sgFosl1-T3	Rep2	Gapdh	Olig2	27.422
KSS49_7_KrasG12V	sgFosl1-T3	Rep3	Gapdh	Olig2	27.511
KSS49_7_KrasG12V	sgFosl1-T3	Rep1	Gapdh	Ncam1	30.018
KSS49_7_KrasG12V	sgFosl1-T3	Rep2	Gapdh	Ncam1	30.591
KSS49_7_KrasG12V	sgFosl1-T3	Rep3	Gapdh	Ncam1	30.011
KSS49_7_KrasG12V	sgFosl1-T3	Rep1	Gapdh	Dll3	32.557
KSS49_7_KrasG12V	sgFosl1-T3	Rep2	Gapdh	Dll3	35.161
KSS49_7_KrasG12V	sgFosl1-T3	Rep3	Gapdh	Dll3	34.564
KSS49_7_KrasG12V	sgFosl1-T3	Rep1	Gapdh	Lgr5	29.828
KSS49_7_KrasG12V	sgFosl1-T3	Rep2	Gapdh	Lgr5	29.988
KSS49_7_KrasG12V	sgFosl1-T3	Rep3	Gapdh	Lgr5	30.135
KSS49_7_KrasG12V	sgFosl1-T3	Rep1	Gapdh	Bcan	28.275
KSS49_7_KrasG12V	sgFosl1-T3	Rep2	Gapdh	Bcan	28.188
KSS49_7_KrasG12V	sgFosl1-T3	Rep3	Gapdh	Bcan	27.887
KSS49_7_KrasG12V	sgFosl1-T4	Rep1	Gapdh	Gapdh	16.196
KSS49_7_KrasG12V	sgFosl1-T4	Rep2	Gapdh	Gapdh	16.136
KSS49_7_KrasG12V	sgFosl1-T4	Rep3	Gapdh	Gapdh	15.975
KSS49_7_KrasG12V	sgFosl1-T4	Rep1	Gapdh	Olig2	22.7
KSS49_7_KrasG12V	sgFosl1-T4	Rep2	Gapdh	Olig2	22.964
KSS49_7_KrasG12V	sgFosl1-T4	Rep3	Gapdh	Olig2	22.692
KSS49_7_KrasG12V	sgFosl1-T4	Rep1	Gapdh	Ncam1	30.903
KSS49_7_KrasG12V	sgFosl1-T4	Rep2	Gapdh	Ncam1	30.66
KSS49_7_KrasG12V	sgFosl1-T4	Rep3	Gapdh	Ncam1	30.191
KSS49_7_KrasG12V	sgFosl1-T4	Rep1	Gapdh	Dll3	29.806
KSS49_7_KrasG12V	sgFosl1-T4	Rep2	Gapdh	Dll3	30.255
KSS49_7_KrasG12V	sgFosl1-T4	Rep3	Gapdh	Dll3	29.557
KSS49_7_KrasG12V	sgFosl1-T4	Rep1	Gapdh	Lgr5	25.941
KSS49_7_KrasG12V	sgFosl1-T4	Rep2	Gapdh	Lgr5	25.974
KSS49_7_KrasG12V	sgFosl1-T4	Rep3	Gapdh	Lgr5	25.892
KSS49_7_KrasG12V	sgFosl1-T4	Rep1	Gapdh	Bcan	23.419
KSS49_7_KrasG12V	sgFosl1-T4	Rep2	Gapdh	Bcan	23.463
KSS49_7_KrasG12V	sgFosl1-T4	Rep3	Gapdh	Bcan	23.553
