# Supplementary material for: NF1 regulates mesenchymal glioblastoma plasticity and aggressiveness through the AP-1 transcription factor FOSL1
Source: eLife. 2021 Aug 17;10:e64846. doi: 10.7554/eLife.64846 (PMC8370767; doi:10.7554/eLife.64846)
Supplement: Figure 6—figure supplement 1—source data 1. [file elife-64846-fig6-figsupp1-data1.xlsx]

## Sheet: Figure6-S1A
# Source data Figure 6-figure supplement 1A
Mouse_ID	days	group	status	gender
XBH26441	149	no DOX	1	female
XBH26442	77	no DOX	1	female
XBH26443	94	no DOX	1	female
XBH26444	68	no DOX	1	female
XBH26445	68	no DOX	1	female
XBH26446	79	no DOX	1	female
XBH26447	141	no DOX	1	female
XBH26448	117	no DOX	1	female
XBH26449	47	DOX	1	female
XBH26450	141	DOX	1	female
XBH26451	86	DOX	1	female
XBH26452	149	DOX	1	female
XBH26453	120	DOX	1	female
XBH26454	56	DOX	1	female
XBH26455	68	DOX	1	female
XBH26456	72	DOX	1	female
