# Supplementary material for: NF1 regulates mesenchymal glioblastoma plasticity and aggressiveness through the AP-1 transcription factor FOSL1
Source: eLife. 2021 Aug 17;10:e64846. doi: 10.7554/eLife.64846 (PMC8370767; doi:10.7554/eLife.64846)
Supplement: Figure 6—source data 4. [file elife-64846-fig6-data4.xlsx]

## Sheet: Figure_6B
# Source_Data_Figure_6B
Cells	Sample	Replicate	Normalizer	Gene	CT
ERG1_CRE	Mock	Rep1	Gapdh	Gapdh	17.311
ERG1_CRE	Mock	Rep2	Gapdh	Gapdh	17.485
ERG1_CRE	Mock	Rep3	Gapdh	Gapdh	17.353
ERG1_CRE	Mock	Rep1	Gapdh	Fosl1	27.418
ERG1_CRE	Mock	Rep2	Gapdh	Fosl1	27.521
ERG1_CRE	Mock	Rep3	Gapdh	Fosl1	27.417
ERG1_CRE	Mock	Rep1	Gapdh	Plau	30.968
ERG1_CRE	Mock	Rep2	Gapdh	Plau	31.033
ERG1_CRE	Mock	Rep3	Gapdh	Plau	30.688
ERG1_CRE	Mock	Rep1	Gapdh	Itga7	23.081
ERG1_CRE	Mock	Rep2	Gapdh	Itga7	23.073
ERG1_CRE	Mock	Rep3	Gapdh	Itga7	23.14
ERG1_CRE	Mock	Rep1	Gapdh	Timp1	26.747
ERG1_CRE	Mock	Rep2	Gapdh	Timp1	26.786
ERG1_CRE	Mock	Rep3	Gapdh	Timp1	26.635
ERG1_CRE	Mock	Rep1	Gapdh	Plaur	28.629
ERG1_CRE	Mock	Rep2	Gapdh	Plaur	28.599
ERG1_CRE	Mock	Rep3	Gapdh	Plaur	28.766
ERG1_CRE	Mock	Rep1	Gapdh	Fn1	27.323
ERG1_CRE	Mock	Rep2	Gapdh	Fn1	27.156
ERG1_CRE	Mock	Rep3	Gapdh	Fn1	27.269
ERG1_CRE	Mock	Rep1	Gapdh	Cyr61	25.488
ERG1_CRE	Mock	Rep2	Gapdh	Cyr61	25.519
ERG1_CRE	Mock	Rep3	Gapdh	Cyr61	25.57
ERG1_CRE	Mock	Rep1	Gapdh	Actn1	24.861
ERG1_CRE	Mock	Rep2	Gapdh	Actn1	24.841
ERG1_CRE	Mock	Rep3	Gapdh	Actn1	24.921
ERG1_CRE	Mock	Rep1	Gapdh	S100a4	30.229
ERG1_CRE	Mock	Rep2	Gapdh	S100a4	29.609
ERG1_CRE	Mock	Rep3	Gapdh	S100a4	29.41
ERG1_CRE	Mock	Rep1	Gapdh	Vim	18.913
ERG1_CRE	Mock	Rep2	Gapdh	Vim	19.298
ERG1_CRE	Mock	Rep3	Gapdh	Vim	19.275
ERG1_CRE	Mock	Rep1	Gapdh	Cd44	25.216
ERG1_CRE	Mock	Rep2	Gapdh	Cd44	24.83
ERG1_CRE	Mock	Rep3	Gapdh	Cd44	24.971
ERG1_CRE	Dox	Rep1	Gapdh	Gapdh	16.975
ERG1_CRE	Dox	Rep2	Gapdh	Gapdh	16.936
ERG1_CRE	Dox	Rep3	Gapdh	Gapdh	16.763
ERG1_CRE	Dox	Rep1	Gapdh	Fosl1	19.551
ERG1_CRE	Dox	Rep2	Gapdh	Fosl1	19.66
ERG1_CRE	Dox	Rep3	Gapdh	Fosl1	19.699
ERG1_CRE	Dox	Rep1	Gapdh	Plau	29.401
ERG1_CRE	Dox	Rep2	Gapdh	Plau	28.897
ERG1_CRE	Dox	Rep3	Gapdh	Plau	29.316
ERG1_CRE	Dox	Rep1	Gapdh	Itga7	22.626
ERG1_CRE	Dox	Rep2	Gapdh	Itga7	22.568
ERG1_CRE	Dox	Rep3	Gapdh	Itga7	22.328
ERG1_CRE	Dox	Rep1	Gapdh	Timp1	24.675
ERG1_CRE	Dox	Rep2	Gapdh	Timp1	24.823
ERG1_CRE	Dox	Rep3	Gapdh	Timp1	24.829
ERG1_CRE	Dox	Rep1	Gapdh	Plaur	24.543
ERG1_CRE	Dox	Rep2	Gapdh	Plaur	24.518
ERG1_CRE	Dox	Rep3	Gapdh	Plaur	24.497
ERG1_CRE	Dox	Rep1	Gapdh	Fn1	26.234
ERG1_CRE	Dox	Rep2	Gapdh	Fn1	26.324
ERG1_CRE	Dox	Rep3	Gapdh	Fn1	26.205
ERG1_CRE	Dox	Rep1	Gapdh	Cyr61	24.8
ERG1_CRE	Dox	Rep2	Gapdh	Cyr61	24.396
ERG1_CRE	Dox	Rep3	Gapdh	Cyr61	24.437
ERG1_CRE	Dox	Rep1	Gapdh	Actn1	24.265
ERG1_CRE	Dox	Rep2	Gapdh	Actn1	24.295
ERG1_CRE	Dox	Rep3	Gapdh	Actn1	24.296
ERG1_CRE	Dox	Rep1	Gapdh	S100a4	28.545
ERG1_CRE	Dox	Rep2	Gapdh	S100a4	28.242
ERG1_CRE	Dox	Rep3	Gapdh	S100a4	28.448
ERG1_CRE	Dox	Rep1	Gapdh	Vim	18.779
ERG1_CRE	Dox	Rep2	Gapdh	Vim	18.966
ERG1_CRE	Dox	Rep3	Gapdh	Vim	18.434
ERG1_CRE	Dox	Rep1	Gapdh	Cd44	23.022
ERG1_CRE	Dox	Rep2	Gapdh	Cd44	22.851
ERG1_CRE	Dox	Rep3	Gapdh	Cd44	22.865

## Sheet: Figure_6C
# Source_Data_Figure_6C
Cells	Sample	Replicate	Normalizer	Gene	CT
ERG1_CRE	Mock	Rep1	Gapdh	Gapdh	17.997
ERG1_CRE	Mock	Rep2	Gapdh	Gapdh	17.932
ERG1_CRE	Mock	Rep3	Gapdh	Gapdh	17.97
ERG1_CRE	Mock	Rep1	Gapdh	Olig2	21.23
ERG1_CRE	Mock	Rep2	Gapdh	Olig2	21.025
ERG1_CRE	Mock	Rep3	Gapdh	Olig2	20.919
ERG1_CRE	Mock	Rep1	Gapdh	Ncam1	28.257
ERG1_CRE	Mock	Rep2	Gapdh	Ncam1	27.969
ERG1_CRE	Mock	Rep3	Gapdh	Ncam1	27.983
ERG1_CRE	Mock	Rep1	Gapdh	Dll3	30.862
ERG1_CRE	Mock	Rep2	Gapdh	Dll3	31.128
ERG1_CRE	Mock	Rep3	Gapdh	Dll3	30.842
ERG1_CRE	Mock	Rep1	Gapdh	Bcan	20.608
ERG1_CRE	Mock	Rep2	Gapdh	Bcan	20.566
ERG1_CRE	Mock	Rep3	Gapdh	Bcan	20.593
ERG1_CRE	Mock	Rep1	Gapdh	Lgr5	27.112
ERG1_CRE	Mock	Rep2	Gapdh	Lgr5	27.051
ERG1_CRE	Mock	Rep3	Gapdh	Lgr5	27.318
ERG1_CRE	Dox	Rep1	Gapdh	Gapdh	17.225
ERG1_CRE	Dox	Rep2	Gapdh	Gapdh	16.93
ERG1_CRE	Dox	Rep3	Gapdh	Gapdh	17.059
ERG1_CRE	Dox	Rep1	Gapdh	Olig2	21.751
ERG1_CRE	Dox	Rep2	Gapdh	Olig2	21.015
ERG1_CRE	Dox	Rep3	Gapdh	Olig2	21.355
ERG1_CRE	Dox	Rep1	Gapdh	Ncam1	28.621
ERG1_CRE	Dox	Rep2	Gapdh	Ncam1	28.561
ERG1_CRE	Dox	Rep3	Gapdh	Ncam1	28.414
ERG1_CRE	Dox	Rep1	Gapdh	Dll3	32.717
ERG1_CRE	Dox	Rep2	Gapdh	Dll3	32.501
ERG1_CRE	Dox	Rep3	Gapdh	Dll3	32.066
ERG1_CRE	Dox	Rep1	Gapdh	Bcan	21.808
ERG1_CRE	Dox	Rep2	Gapdh	Bcan	21.611
ERG1_CRE	Dox	Rep3	Gapdh	Bcan	21.668
ERG1_CRE	Dox	Rep1	Gapdh	Lgr5	27.575
ERG1_CRE	Dox	Rep2	Gapdh	Lgr5	27.931
ERG1_CRE	Dox	Rep3	Gapdh	Lgr5	27.938

## Sheet: Figure_6D
# Source_Data_Figure_6D
Group	Area
-Dox	6794950
-Dox	9269105
-Dox	14153720
-Dox	8826292
-Dox	8706059
-Dox	10421930
-Dox	11142260
-Dox	6326221
+Dox	18081160
+Dox	19428660
+Dox	7747202
+Dox	17085310
+Dox	8171739
+Dox	8029088
+Dox	9343182
+Dox	24084030

## Sheet: Figure_6F
# Source_Data_Figure_6F
Cells	Sample	Replicate	Normalizer	Gene	CT
T445-DOX	Mock	Rep1	Gapdh	Gapdh	16.2
T445-DOX	Mock	Rep2	Gapdh	Gapdh	16.159
T445-DOX	Mock	Rep3	Gapdh	Gapdh	16.125
T445-DOX	Mock	Rep1	Gapdh	Fosl1	25.524
T445-DOX	Mock	Rep2	Gapdh	Fosl1	25.544
T445-DOX	Mock	Rep3	Gapdh	Fosl1	25.522
T445-DOX	Mock	Rep1	Gapdh	Plau	27.196
T445-DOX	Mock	Rep2	Gapdh	Plau	27.015
T445-DOX	Mock	Rep3	Gapdh	Plau	27.334
T445-DOX	Mock	Rep1	Gapdh	Itga7	26.213
T445-DOX	Mock	Rep2	Gapdh	Itga7	26.079
T445-DOX	Mock	Rep3	Gapdh	Itga7	26.073
T445-DOX	Mock	Rep1	Gapdh	Timp1	23.967
T445-DOX	Mock	Rep2	Gapdh	Timp1	24.265
T445-DOX	Mock	Rep3	Gapdh	Timp1	24.116
T445-DOX	Mock	Rep1	Gapdh	Plaur	24.973
T445-DOX	Mock	Rep2	Gapdh	Plaur	24.962
T445-DOX	Mock	Rep3	Gapdh	Plaur	24.96
T445-DOX	Mock	Rep1	Gapdh	Fn1	25.97
T445-DOX	Mock	Rep2	Gapdh	Fn1	25.936
T445-DOX	Mock	Rep3	Gapdh	Fn1	25.645
T445-DOX	Mock	Rep1	Gapdh	Cyr61	25.117
T445-DOX	Mock	Rep2	Gapdh	Cyr61	25.147
T445-DOX	Mock	Rep3	Gapdh	Cyr61	24.98
T445-DOX	Mock	Rep1	Gapdh	Actn1	24.455
T445-DOX	Mock	Rep2	Gapdh	Actn1	24.463
T445-DOX	Mock	Rep3	Gapdh	Actn1	24.383
T445-DOX	Mock	Rep1	Gapdh	S100a4	26.963
T445-DOX	Mock	Rep2	Gapdh	S100a4	26.988
T445-DOX	Mock	Rep3	Gapdh	S100a4	27.028
T445-DOX	Mock	Rep1	Gapdh	Vim	19.794
T445-DOX	Mock	Rep2	Gapdh	Vim	20.503
T445-DOX	Mock	Rep3	Gapdh	Vim	20.06
T445-DOX	Mock	Rep1	Gapdh	Cd44	21.873
T445-DOX	Mock	Rep2	Gapdh	Cd44	21.67
T445-DOX	Mock	Rep3	Gapdh	Cd44	21.471
T445+DOX	Dox	Rep1	Gapdh	Gapdh	15.984
T445+DOX	Dox	Rep2	Gapdh	Gapdh	15.98
T445+DOX	Dox	Rep3	Gapdh	Gapdh	16.016
T445+DOX	Dox	Rep1	Gapdh	Fosl1	20.391
T445+DOX	Dox	Rep2	Gapdh	Fosl1	20.406
T445+DOX	Dox	Rep3	Gapdh	Fosl1	20.319
T445+DOX	Dox	Rep1	Gapdh	Plau	25.705
T445+DOX	Dox	Rep2	Gapdh	Plau	25.627
T445+DOX	Dox	Rep3	Gapdh	Plau	25.302
T445+DOX	Dox	Rep1	Gapdh	Itga7	24.348
T445+DOX	Dox	Rep2	Gapdh	Itga7	24.425
T445+DOX	Dox	Rep3	Gapdh	Itga7	24.457
T445+DOX	Dox	Rep1	Gapdh	Timp1	24.238
T445+DOX	Dox	Rep2	Gapdh	Timp1	24.289
T445+DOX	Dox	Rep3	Gapdh	Timp1	24.495
T445+DOX	Dox	Rep1	Gapdh	Plaur	22.528
T445+DOX	Dox	Rep2	Gapdh	Plaur	22.639
T445+DOX	Dox	Rep3	Gapdh	Plaur	22.845
T445+DOX	Dox	Rep1	Gapdh	Fn1	26.104
T445+DOX	Dox	Rep2	Gapdh	Fn1	26.095
T445+DOX	Dox	Rep3	Gapdh	Fn1	25.973
T445+DOX	Dox	Rep1	Gapdh	Cyr61	23.747
T445+DOX	Dox	Rep2	Gapdh	Cyr61	23.976
T445+DOX	Dox	Rep3	Gapdh	Cyr61	23.894
T445+DOX	Dox	Rep1	Gapdh	Actn1	22.08
T445+DOX	Dox	Rep2	Gapdh	Actn1	21.964
T445+DOX	Dox	Rep3	Gapdh	Actn1	21.964
T445+DOX	Dox	Rep1	Gapdh	S100a4	27.071
T445+DOX	Dox	Rep2	Gapdh	S100a4	27.036
T445+DOX	Dox	Rep3	Gapdh	S100a4	27.182
T445+DOX	Dox	Rep1	Gapdh	Vim	19.496
T445+DOX	Dox	Rep2	Gapdh	Vim	19.407
T445+DOX	Dox	Rep3	Gapdh	Vim	19.589
T445+DOX	Dox	Rep1	Gapdh	Cd44	22.215
T445+DOX	Dox	Rep2	Gapdh	Cd44	21.149
T445+DOX	Dox	Rep3	Gapdh	Cd44	21.156

## Sheet: Figure_6G
# Source_Data_Figure_6G
Cells	Sample	Replicate	Normalizer	Gene	CT
T445-DOX	Mock	Rep1	Gapdh	Gapdh	16.2
T445-DOX	Mock	Rep2	Gapdh	Gapdh	16.159
T445-DOX	Mock	Rep3	Gapdh	Gapdh	16.125
T445-DOX	Mock	Rep1	Gapdh	Olig2	21.545
T445-DOX	Mock	Rep2	Gapdh	Olig2	21.365
T445-DOX	Mock	Rep3	Gapdh	Olig2	21.58
T445-DOX	Mock	Rep1	Gapdh	Ncam1	27.856
T445-DOX	Mock	Rep2	Gapdh	Ncam1	27.766
T445-DOX	Mock	Rep3	Gapdh	Ncam1	27.989
T445-DOX	Mock	Rep1	Gapdh	Dll3	33.47
T445-DOX	Mock	Rep2	Gapdh	Dll3	34.685
T445-DOX	Mock	Rep3	Gapdh	Dll3	32.9
T445-DOX	Mock	Rep1	Gapdh	Bcan	22.982
T445-DOX	Mock	Rep2	Gapdh	Bcan	22.904
T445-DOX	Mock	Rep3	Gapdh	Bcan	22.867
T445-DOX	Mock	Rep1	Gapdh	Lgr5	25.81
T445-DOX	Mock	Rep2	Gapdh	Lgr5	25.753
T445-DOX	Mock	Rep3	Gapdh	Lgr5	25.922
T445+DOX	Dox	Rep1	Gapdh	Gapdh	15.984
T445+DOX	Dox	Rep2	Gapdh	Gapdh	15.98
T445+DOX	Dox	Rep3	Gapdh	Gapdh	16.016
T445+DOX	Dox	Rep1	Gapdh	Olig2	21.631
T445+DOX	Dox	Rep2	Gapdh	Olig2	21.633
T445+DOX	Dox	Rep3	Gapdh	Olig2	21.471
T445+DOX	Dox	Rep1	Gapdh	Ncam1	29.226
T445+DOX	Dox	Rep2	Gapdh	Ncam1	29.351
T445+DOX	Dox	Rep3	Gapdh	Ncam1	29.39
T445+DOX	Dox	Rep1	Gapdh	Dll3	33.212
T445+DOX	Dox	Rep2	Gapdh	Dll3	33.099
T445+DOX	Dox	Rep3	Gapdh	Dll3	33.256
T445+DOX	Dox	Rep1	Gapdh	Bcan	24.164
T445+DOX	Dox	Rep2	Gapdh	Bcan	23.988
T445+DOX	Dox	Rep3	Gapdh	Bcan	24.048
T445+DOX	Dox	Rep1	Gapdh	Lgr5	30.369
T445+DOX	Dox	Rep2	Gapdh	Lgr5	30.019
T445+DOX	Dox	Rep3	Gapdh	Lgr5	30.374

## Sheet: Figure_6I
# Source_Data_Figure_6I
Cells	Sample	Replicate	Normalizer	Gene	CT
T455+DOX	Dox	Rep1	Gapdh	Gapdh	16.678
T455+DOX	Dox	Rep2	Gapdh	Gapdh	16.489
T455+DOX	Dox	Rep3	Gapdh	Gapdh	16.382
T455+DOX	Dox	Rep1	Gapdh	Fosl1	19.919
T455+DOX	Dox	Rep2	Gapdh	Fosl1	19.873
T455+DOX	Dox	Rep3	Gapdh	Fosl1	19.993
T455+DOX	Dox	Rep1	Gapdh	Plau	27.867
T455+DOX	Dox	Rep2	Gapdh	Plau	27.657
T455+DOX	Dox	Rep3	Gapdh	Plau	27.82
T455+DOX	Dox	Rep1	Gapdh	Itga7	22.73
T455+DOX	Dox	Rep2	Gapdh	Itga7	22.783
T455+DOX	Dox	Rep3	Gapdh	Itga7	22.67
T455+DOX	Dox	Rep1	Gapdh	Timp1	23.656
T455+DOX	Dox	Rep2	Gapdh	Timp1	23.892
T455+DOX	Dox	Rep3	Gapdh	Timp1	23.797
T455+DOX	Dox	Rep1	Gapdh	Plaur	24.049
T455+DOX	Dox	Rep2	Gapdh	Plaur	24.02
T455+DOX	Dox	Rep3	Gapdh	Plaur	24.053
T455+DOX	Dox	Rep1	Gapdh	Fn1	25.288
T455+DOX	Dox	Rep2	Gapdh	Fn1	25.474
T455+DOX	Dox	Rep3	Gapdh	Fn1	25.372
T455+DOX	Dox	Rep1	Gapdh	Cyr61	24.211
T455+DOX	Dox	Rep2	Gapdh	Cyr61	24.16
T455+DOX	Dox	Rep3	Gapdh	Cyr61	24.177
T455+DOX	Dox	Rep1	Gapdh	Actn1	22.155
T455+DOX	Dox	Rep2	Gapdh	Actn1	22.05
T455+DOX	Dox	Rep3	Gapdh	Actn1	21.936
T455+DOX	Dox	Rep1	Gapdh	S100a4	25.839
T455+DOX	Dox	Rep2	Gapdh	S100a4	25.79
T455+DOX	Dox	Rep3	Gapdh	S100a4	25.92
T455+DOX	Dox	Rep1	Gapdh	Vim	18.489
T455+DOX	Dox	Rep2	Gapdh	Vim	18.638
T455+DOX	Dox	Rep3	Gapdh	Vim	18.531
T455+DOX	Dox	Rep1	Gapdh	Cd44	20.927
T455+DOX	Dox	Rep2	Gapdh	Cd44	20.855
T455+DOX	Dox	Rep3	Gapdh	Cd44	20.906
T455-DOX	Mock	Rep1	Gapdh	Gapdh	16.751
T455-DOX	Mock	Rep2	Gapdh	Gapdh	16.806
T455-DOX	Mock	Rep3	Gapdh	Gapdh	16.897
T455-DOX	Mock	Rep1	Gapdh	Fosl1	23.664
T455-DOX	Mock	Rep2	Gapdh	Fosl1	23.731
T455-DOX	Mock	Rep3	Gapdh	Fosl1	23.808
T455-DOX	Mock	Rep1	Gapdh	Plau	27.674
T455-DOX	Mock	Rep2	Gapdh	Plau	27.647
T455-DOX	Mock	Rep3	Gapdh	Plau	27.656
T455-DOX	Mock	Rep1	Gapdh	Itga7	23.7
T455-DOX	Mock	Rep2	Gapdh	Itga7	23.811
T455-DOX	Mock	Rep3	Gapdh	Itga7	23.905
T455-DOX	Mock	Rep1	Gapdh	Timp1	22.991
T455-DOX	Mock	Rep2	Gapdh	Timp1	23.163
T455-DOX	Mock	Rep3	Gapdh	Timp1	23.05
T455-DOX	Mock	Rep1	Gapdh	Plaur	25.074
T455-DOX	Mock	Rep2	Gapdh	Plaur	25.207
T455-DOX	Mock	Rep3	Gapdh	Plaur	25.004
T455-DOX	Mock	Rep1	Gapdh	Fn1	26.076
T455-DOX	Mock	Rep2	Gapdh	Fn1	25.805
T455-DOX	Mock	Rep3	Gapdh	Fn1	25.839
T455-DOX	Mock	Rep1	Gapdh	Cyr61	25.981
T455-DOX	Mock	Rep2	Gapdh	Cyr61	25.87
T455-DOX	Mock	Rep3	Gapdh	Cyr61	26.156
T455-DOX	Mock	Rep1	Gapdh	Actn1	23.218
T455-DOX	Mock	Rep2	Gapdh	Actn1	23.696
T455-DOX	Mock	Rep3	Gapdh	Actn1	23.544
T455-DOX	Mock	Rep1	Gapdh	S100a4	29.939
T455-DOX	Mock	Rep2	Gapdh	S100a4	30.066
T455-DOX	Mock	Rep3	Gapdh	S100a4	30.313
T455-DOX	Mock	Rep1	Gapdh	Vim	19.692
T455-DOX	Mock	Rep2	Gapdh	Vim	19.857
T455-DOX	Mock	Rep3	Gapdh	Vim	19.79
T455-DOX	Mock	Rep1	Gapdh	Cd44	22.288
T455-DOX	Mock	Rep2	Gapdh	Cd44	22.309
T455-DOX	Mock	Rep3	Gapdh	Cd44	22.128

## Sheet: Figure_6J
# Source_Data_Figure_6J
Cells	Sample	Replicate	Normalizer	Gene	CT
T455+DOX	Dox	Rep1	Gapdh	Gapdh	16.678
T455+DOX	Dox	Rep2	Gapdh	Gapdh	16.489
T455+DOX	Dox	Rep3	Gapdh	Gapdh	16.382
T455+DOX	Dox	Rep1	Gapdh	Olig2	20.646
T455+DOX	Dox	Rep2	Gapdh	Olig2	20.702
T455+DOX	Dox	Rep3	Gapdh	Olig2	20.598
T455+DOX	Dox	Rep1	Gapdh	Ncam1	28.641
T455+DOX	Dox	Rep2	Gapdh	Ncam1	28.425
T455+DOX	Dox	Rep3	Gapdh	Ncam1	28.483
T455+DOX	Dox	Rep1	Gapdh	Dll3	30.921
T455+DOX	Dox	Rep2	Gapdh	Dll3	31.916
T455+DOX	Dox	Rep3	Gapdh	Dll3	33.4
T455+DOX	Dox	Rep1	Gapdh	Bcan	22.417
T455+DOX	Dox	Rep2	Gapdh	Bcan	22.333
T455+DOX	Dox	Rep3	Gapdh	Bcan	22.397
T455+DOX	Dox	Rep1	Gapdh	Lgr5	29.918
T455+DOX	Dox	Rep2	Gapdh	Lgr5	29.728
T455+DOX	Dox	Rep3	Gapdh	Lgr5	29.45
T455-DOX	Mock	Rep1	Gapdh	Gapdh	16.751
T455-DOX	Mock	Rep2	Gapdh	Gapdh	16.806
T455-DOX	Mock	Rep3	Gapdh	Gapdh	16.897
T455-DOX	Mock	Rep1	Gapdh	Olig2	20.559
T455-DOX	Mock	Rep2	Gapdh	Olig2	20.866
T455-DOX	Mock	Rep3	Gapdh	Olig2	20.551
T455-DOX	Mock	Rep1	Gapdh	Ncam1	27.724
T455-DOX	Mock	Rep2	Gapdh	Ncam1	28.193
T455-DOX	Mock	Rep3	Gapdh	Ncam1	27.622
T455-DOX	Mock	Rep1	Gapdh	Dll3	30.657
T455-DOX	Mock	Rep2	Gapdh	Dll3	29.976
T455-DOX	Mock	Rep3	Gapdh	Dll3	29.913
T455-DOX	Mock	Rep1	Gapdh	Bcan	22.135
T455-DOX	Mock	Rep2	Gapdh	Bcan	22.122
T455-DOX	Mock	Rep3	Gapdh	Bcan	22.097
T455-DOX	Mock	Rep1	Gapdh	Lgr5	27.415
T455-DOX	Mock	Rep2	Gapdh	Lgr5	27.161
T455-DOX	Mock	Rep3	Gapdh	Lgr5	27.212
