# Supplementary material for: NF1 regulates mesenchymal glioblastoma plasticity and aggressiveness through the AP-1 transcription factor FOSL1
Source: eLife. 2021 Aug 17;10:e64846. doi: 10.7554/eLife.64846 (PMC8370767; doi:10.7554/eLife.64846)
Supplement: Figure 7—figure supplement 1—source data 4. [file elife-64846-fig7-figsupp1-data4.xlsx]

## Sheet: Figure7-S1B
# Source data Figure 7-figure supplement 1B
Sample	Treatment	day	value
shGFP	-Dox	d1	0.204
shGFP	-Dox	d1	0.216
shGFP	-Dox	d1	0.214
shGFP	-Dox	d1	0.21
shGFP	-Dox	d1	0.217
shGFP	-Dox	d1	0.223
shGFP	-Dox	d1	0.217
shGFP	-Dox	d1	0.214
shGFP	-Dox	d1	0.218
shGFP	-Dox	d1	0.217
shGFP	-Dox	d1	0.236
shGFP	-Dox	d1	0.222
shGFP	-Dox	d1	0.226
shGFP	-Dox	d1	0.218
shGFP	-Dox	d1	0.218
shGFP	+Dox	d1	0.206
shGFP	+Dox	d1	0.198
shGFP	+Dox	d1	0.195
shGFP	+Dox	d1	0.21
shGFP	+Dox	d1	0.215
shGFP	+Dox	d1	0.2
shGFP	+Dox	d1	0.205
shGFP	+Dox	d1	0.212
shGFP	+Dox	d1	0.211
shGFP	+Dox	d1	0.223
shGFP	+Dox	d1	0.202
shGFP	+Dox	d1	0.218
shGFP	+Dox	d1	0.214
shGFP	+Dox	d1	0.214
shGFP	+Dox	d1	0.221
shFOSL1_3	-Dox	d1	0.18
shFOSL1_3	-Dox	d1	0.178
shFOSL1_3	-Dox	d1	0.174
shFOSL1_3	-Dox	d1	0.175
shFOSL1_3	-Dox	d1	0.173
shFOSL1_3	-Dox	d1	0.203
shFOSL1_3	-Dox	d1	0.182
shFOSL1_3	-Dox	d1	0.185
shFOSL1_3	-Dox	d1	0.181
shFOSL1_3	-Dox	d1	0.184
shFOSL1_3	-Dox	d1	0.193
shFOSL1_3	-Dox	d1	0.188
shFOSL1_3	-Dox	d1	0.18
shFOSL1_3	-Dox	d1	0.191
shFOSL1_3	-Dox	d1	0.184
shFOSL1_3	+Dox	d1	0.182
shFOSL1_3	+Dox	d1	0.18
shFOSL1_3	+Dox	d1	0.182
shFOSL1_3	+Dox	d1	0.202
shFOSL1_3	+Dox	d1	0.184
shFOSL1_3	+Dox	d1	0.182
shFOSL1_3	+Dox	d1	0.185
shFOSL1_3	+Dox	d1	0.18
shFOSL1_3	+Dox	d1	0.188
shFOSL1_3	+Dox	d1	0.197
shFOSL1_3	+Dox	d1	0.209
shFOSL1_3	+Dox	d1	0.191
shFOSL1_3	+Dox	d1	0.191
shFOSL1_3	+Dox	d1	0.187
shFOSL1_3	+Dox	d1	0.21
shGFP	-Dox	d3	0.362
shGFP	-Dox	d3	0.324
shGFP	-Dox	d3	0.299
shGFP	-Dox	d3	0.316
shGFP	-Dox	d3	0.309
shGFP	-Dox	d3	0.346
shGFP	-Dox	d3	0.336
shGFP	-Dox	d3	0.321
shGFP	-Dox	d3	0.333
shGFP	-Dox	d3	0.326
shGFP	-Dox	d3	0.355
shGFP	-Dox	d3	0.337
shGFP	-Dox	d3	0.327
shGFP	-Dox	d3	0.325
shGFP	-Dox	d3	0.344
shGFP	+Dox	d3	0.332
shGFP	+Dox	d3	0.335
shGFP	+Dox	d3	0.326
shGFP	+Dox	d3	0.322
shGFP	+Dox	d3	0.348
shGFP	+Dox	d3	0.312
shGFP	+Dox	d3	0.33
shGFP	+Dox	d3	0.346
shGFP	+Dox	d3	0.34
shGFP	+Dox	d3	0.348
shGFP	+Dox	d3	0.337
shGFP	+Dox	d3	0.338
shGFP	+Dox	d3	0.342
shGFP	+Dox	d3	0.351
shGFP	+Dox	d3	0.358
shFOSL1_3	-Dox	d3	0.285
shFOSL1_3	-Dox	d3	0.292
shFOSL1_3	-Dox	d3	0.284
shFOSL1_3	-Dox	d3	0.277
shFOSL1_3	-Dox	d3	0.293
shFOSL1_3	-Dox	d3	0.31
shFOSL1_3	-Dox	d3	0.292
shFOSL1_3	-Dox	d3	0.251
shFOSL1_3	-Dox	d3	0.3
shFOSL1_3	-Dox	d3	0.298
shFOSL1_3	-Dox	d3	0.299
shFOSL1_3	-Dox	d3	0.352
shFOSL1_3	-Dox	d3	0.275
shFOSL1_3	-Dox	d3	0.253
shFOSL1_3	-Dox	d3	0.301
shFOSL1_3	+Dox	d3	0.285
shFOSL1_3	+Dox	d3	0.283
shFOSL1_3	+Dox	d3	0.282
shFOSL1_3	+Dox	d3	0.301
shFOSL1_3	+Dox	d3	0.306
shFOSL1_3	+Dox	d3	0.287
shFOSL1_3	+Dox	d3	0.282
shFOSL1_3	+Dox	d3	0.288
shFOSL1_3	+Dox	d3	0.281
shFOSL1_3	+Dox	d3	0.29
shFOSL1_3	+Dox	d3	0.308
shFOSL1_3	+Dox	d3	0.308
shFOSL1_3	+Dox	d3	0.311
shFOSL1_3	+Dox	d3	0.318
shFOSL1_3	+Dox	d3	0.325
shGFP	-Dox	d5	0.697
shGFP	-Dox	d5	0.658
shGFP	-Dox	d5	0.638
shGFP	-Dox	d5	0.683
shGFP	-Dox	d5	0.656
shGFP	-Dox	d5	0.636
shGFP	-Dox	d5	0.629
shGFP	-Dox	d5	0.696
shGFP	-Dox	d5	0.67
shGFP	-Dox	d5	0.656
shGFP	-Dox	d5	0.659
shGFP	-Dox	d5	0.689
shGFP	-Dox	d5	0.684
shGFP	-Dox	d5	0.696
shGFP	-Dox	d5	0.665
shGFP	+Dox	d5	0.622
shGFP	+Dox	d5	0.665
shGFP	+Dox	d5	0.612
shGFP	+Dox	d5	0.607
shGFP	+Dox	d5	0.649
shGFP	+Dox	d5	0.644
shGFP	+Dox	d5	0.66
shGFP	+Dox	d5	0.647
shGFP	+Dox	d5	0.628
shGFP	+Dox	d5	0.711
shGFP	+Dox	d5	0.623
shGFP	+Dox	d5	0.594
shGFP	+Dox	d5	0.626
shGFP	+Dox	d5	0.61
shGFP	+Dox	d5	0.626
shFOSL1_3	-Dox	d5	0.601
shFOSL1_3	-Dox	d5	0.586
shFOSL1_3	-Dox	d5	0.571
shFOSL1_3	-Dox	d5	0.593
shFOSL1_3	-Dox	d5	0.575
shFOSL1_3	-Dox	d5	0.587
shFOSL1_3	-Dox	d5	0.609
shFOSL1_3	-Dox	d5	0.616
shFOSL1_3	-Dox	d5	0.628
shFOSL1_3	-Dox	d5	0.596
shFOSL1_3	-Dox	d5	0.595
shFOSL1_3	-Dox	d5	0.627
shFOSL1_3	-Dox	d5	0.63
shFOSL1_3	-Dox	d5	0.643
shFOSL1_3	-Dox	d5	0.598
shFOSL1_3	+Dox	d5	0.487
shFOSL1_3	+Dox	d5	0.488
shFOSL1_3	+Dox	d5	0.465
shFOSL1_3	+Dox	d5	0.477
shFOSL1_3	+Dox	d5	0.518
shFOSL1_3	+Dox	d5	0.475
shFOSL1_3	+Dox	d5	0.457
shFOSL1_3	+Dox	d5	0.468
shFOSL1_3	+Dox	d5	0.496
shFOSL1_3	+Dox	d5	0.484
shFOSL1_3	+Dox	d5	0.52
shFOSL1_3	+Dox	d5	0.476
shFOSL1_3	+Dox	d5	0.474
shFOSL1_3	+Dox	d5	0.496
shFOSL1_3	+Dox	d5	0.525
shGFP	-Dox	d7	1.274
shGFP	-Dox	d7	1.06
shGFP	-Dox	d7	1.07
shGFP	-Dox	d7	1.102
shGFP	-Dox	d7	1.031
shGFP	-Dox	d7	1.038
shGFP	-Dox	d7	0.943
shGFP	-Dox	d7	0.969
shGFP	-Dox	d7	0.912
shGFP	-Dox	d7	1.01
shGFP	-Dox	d7	1.174
shGFP	-Dox	d7	1.197
shGFP	-Dox	d7	1.101
shGFP	-Dox	d7	1.048
shGFP	-Dox	d7	1.07
shGFP	+Dox	d7	0.968
shGFP	+Dox	d7	0.962
shGFP	+Dox	d7	0.916
shGFP	+Dox	d7	0.989
shGFP	+Dox	d7	1.02
shGFP	+Dox	d7	0.966
shGFP	+Dox	d7	0.961
shGFP	+Dox	d7	0.958
shGFP	+Dox	d7	0.98
shGFP	+Dox	d7	1.048
shGFP	+Dox	d7	1.039
shGFP	+Dox	d7	1.028
shGFP	+Dox	d7	1.026
shGFP	+Dox	d7	1.116
shGFP	+Dox	d7	1.06
shFOSL1_3	-Dox	d7	1.074
shFOSL1_3	-Dox	d7	0.89
shFOSL1_3	-Dox	d7	0.903
shFOSL1_3	-Dox	d7	0.865
shFOSL1_3	-Dox	d7	0.833
shFOSL1_3	-Dox	d7	0.954
shFOSL1_3	-Dox	d7	0.911
shFOSL1_3	-Dox	d7	0.924
shFOSL1_3	-Dox	d7	0.88
shFOSL1_3	-Dox	d7	0.801
shFOSL1_3	-Dox	d7	0.996
shFOSL1_3	-Dox	d7	0.934
shFOSL1_3	-Dox	d7	0.936
shFOSL1_3	-Dox	d7	0.925
shFOSL1_3	-Dox	d7	0.912
shFOSL1_3	+Dox	d7	0.514
shFOSL1_3	+Dox	d7	0.541
shFOSL1_3	+Dox	d7	0.525
shFOSL1_3	+Dox	d7	0.532
shFOSL1_3	+Dox	d7	0.624
shFOSL1_3	+Dox	d7	0.568
shFOSL1_3	+Dox	d7	0.537
shFOSL1_3	+Dox	d7	0.539
shFOSL1_3	+Dox	d7	0.57
shFOSL1_3	+Dox	d7	0.619
shFOSL1_3	+Dox	d7	0.585
shFOSL1_3	+Dox	d7	0.579
shFOSL1_3	+Dox	d7	0.6
shFOSL1_3	+Dox	d7	0.585
shFOSL1_3	+Dox	d7	0.59

## Sheet: Figure7-S1C
# Source data Figure 7-figure supplement 1C
Sample	Treatment	BrdU
shGFP	-Dox	19.8
shGFP	-Dox	19.2
shGFP	-Dox	19.5
shGFP	+Dox	17.1
shGFP	+Dox	18.6
shGFP	+Dox	19
shFOSL1_3	-Dox	16.8
shFOSL1_3	-Dox	17.9
shFOSL1_3	-Dox	15.2
shFOSL1_3	+Dox	7.67
shFOSL1_3	+Dox	8.09
shFOSL1_3	+Dox	8.34

## Sheet: Figure7-S1D
# Source data Figure 7-figure supplement 1D
Group	Dose	Tested	Response
shFOSL1-DOX	20	96	96
shFOSL1-DOX	10	96	95
shFOSL1-DOX	5	96	84
shFOSL1-DOX	2	96	55
shFOSL1-DOX	1	96	32
shFOSL1+DOX	20	96	96
shFOSL1+DOX	15	96	93
shFOSL1+DOX	5	96	62
shFOSL1+DOX	2	96	20
shFOSL1+DOX	1	96	12

## Sheet: Figure7-S1E
# Source data Figure 7-figure supplement 1E
Cells	Sample	Replicate	Normalizer	Gene	CT	Figure
BTSC349_shFosl1	-Dox	Rep1	GAPDH	GAPDH	16.995	left
BTSC349_shFosl1	-Dox	Rep2	GAPDH	GAPDH	16.68	left
BTSC349_shFosl1	-Dox	Rep3	GAPDH	GAPDH	16.696	left
BTSC349_shFosl1	-Dox	Rep1	GAPDH	FOSL1	22.462	left
BTSC349_shFosl1	-Dox	Rep2	GAPDH	FOSL1	22.253	left
BTSC349_shFosl1	-Dox	Rep3	GAPDH	FOSL1	22.044	left
BTSC349_shFosl1	-Dox	Rep1	GAPDH	TIMP1	18.312	left
BTSC349_shFosl1	-Dox	Rep2	GAPDH	TIMP1	18.321	left
BTSC349_shFosl1	-Dox	Rep3	GAPDH	TIMP1	18.29	left
BTSC349_shFosl1	-Dox	Rep1	GAPDH	FN1	17.009	left
BTSC349_shFosl1	-Dox	Rep2	GAPDH	FN1	16.952	left
BTSC349_shFosl1	-Dox	Rep3	GAPDH	FN1	16.88	left
BTSC349_shFosl1	-Dox	Rep1	GAPDH	VIM	14.773	left
BTSC349_shFosl1	-Dox	Rep2	GAPDH	VIM	14.811	left
BTSC349_shFosl1	-Dox	Rep3	GAPDH	VIM	14.771	left
BTSC349_shFosl1	-Dox	Rep1	GAPDH	CD44	18.259	left
BTSC349_shFosl1	-Dox	Rep2	GAPDH	CD44	18.12	left
BTSC349_shFosl1	-Dox	Rep3	GAPDH	CD44	18.016	left
BTSC349_shFosl1	-Dox	Rep1	GAPDH	S100A4	26.419	left
BTSC349_shFosl1	-Dox	Rep2	GAPDH	S100A4	26.514	left
BTSC349_shFosl1	-Dox	Rep3	GAPDH	S100A4	26.522	left
BTSC349_shFosl1	-Dox	Rep1	GAPDH	CTGF	22.887	left
BTSC349_shFosl1	-Dox	Rep2	GAPDH	CTGF	22.969	left
BTSC349_shFosl1	-Dox	Rep3	GAPDH	CTGF	23.016	left
BTSC349_shFosl1	-Dox	Rep1	GAPDH	SERPINE1	20.598	left
BTSC349_shFosl1	-Dox	Rep2	GAPDH	SERPINE1	20.65	left
BTSC349_shFosl1	-Dox	Rep3	GAPDH	SERPINE1	20.667	left
BTSC349_shFosl1	-Dox	Rep1	GAPDH	RUNX1	32.277	left
BTSC349_shFosl1	-Dox	Rep2	GAPDH	RUNX1	33.554	left
BTSC349_shFosl1	-Dox	Rep3	GAPDH	RUNX1	32.996	left
BTSC349_shFosl1	-Dox	Rep1	GAPDH	STAT3	28.934	left
BTSC349_shFosl1	-Dox	Rep2	GAPDH	STAT3	29.01	left
BTSC349_shFosl1	-Dox	Rep3	GAPDH	STAT3	29.094	left
BTSC349_shFosl1	+Dox	Rep1	GAPDH	GAPDH	16.357	left
BTSC349_shFosl1	+Dox	Rep2	GAPDH	GAPDH	16.705	left
BTSC349_shFosl1	+Dox	Rep3	GAPDH	GAPDH	16.519	left
BTSC349_shFosl1	+Dox	Rep1	GAPDH	FOSL1	26.97	left
BTSC349_shFosl1	+Dox	Rep2	GAPDH	FOSL1	25.786	left
BTSC349_shFosl1	+Dox	Rep3	GAPDH	FOSL1	25.836	left
BTSC349_shFosl1	+Dox	Rep1	GAPDH	TIMP1	19.691	left
BTSC349_shFosl1	+Dox	Rep2	GAPDH	TIMP1	19.871	left
BTSC349_shFosl1	+Dox	Rep3	GAPDH	TIMP1	19.671	left
BTSC349_shFosl1	+Dox	Rep1	GAPDH	FN1	17.252	left
BTSC349_shFosl1	+Dox	Rep2	GAPDH	FN1	17.317	left
BTSC349_shFosl1	+Dox	Rep3	GAPDH	FN1	17.184	left
BTSC349_shFosl1	+Dox	Rep1	GAPDH	VIM	16.049	left
BTSC349_shFosl1	+Dox	Rep2	GAPDH	VIM	16.118	left
BTSC349_shFosl1	+Dox	Rep3	GAPDH	VIM	16.175	left
BTSC349_shFosl1	+Dox	Rep1	GAPDH	CD44	19.013	left
BTSC349_shFosl1	+Dox	Rep2	GAPDH	CD44	19.031	left
BTSC349_shFosl1	+Dox	Rep3	GAPDH	CD44	18.964	left
BTSC349_shFosl1	+Dox	Rep1	GAPDH	S100A4	27.198	left
BTSC349_shFosl1	+Dox	Rep2	GAPDH	S100A4	27.231	left
BTSC349_shFosl1	+Dox	Rep3	GAPDH	S100A4	27.399	left
BTSC349_shFosl1	+Dox	Rep1	GAPDH	CTGF	23.896	left
BTSC349_shFosl1	+Dox	Rep2	GAPDH	CTGF	23.973	left
BTSC349_shFosl1	+Dox	Rep3	GAPDH	CTGF	23.999	left
BTSC349_shFosl1	+Dox	Rep1	GAPDH	SERPINE1	22.073	left
BTSC349_shFosl1	+Dox	Rep2	GAPDH	SERPINE1	21.779	left
BTSC349_shFosl1	+Dox	Rep3	GAPDH	SERPINE1	21.944	left
BTSC349_shFosl1	+Dox	Rep1	GAPDH	RUNX1	32.897	left
BTSC349_shFosl1	+Dox	Rep2	GAPDH	RUNX1	33.815	left
BTSC349_shFosl1	+Dox	Rep3	GAPDH	RUNX1	37.073	left
BTSC349_shFosl1	+Dox	Rep1	GAPDH	STAT3	29.819	left
BTSC349_shFosl1	+Dox	Rep2	GAPDH	STAT3	29.848	left
BTSC349_shFosl1	+Dox	Rep3	GAPDH	STAT3	29.947	left
BTSC349_shFosl1	-Dox	Rep1	GAPDH	GAPDH	15.272	right
BTSC349_shFosl1	-Dox	Rep2	GAPDH	GAPDH	15.267	right
BTSC349_shFosl1	-Dox	Rep3	GAPDH	GAPDH	15.104	right
BTSC349_shFosl1	-Dox	Rep1	GAPDH	OLIG2	34.71	right
BTSC349_shFosl1	-Dox	Rep2	GAPDH	OLIG2	35.563	right
BTSC349_shFosl1	-Dox	Rep3	GAPDH	OLIG2	35.332	right
BTSC349_shFosl1	-Dox	Rep1	GAPDH	NCAM1	23.058	right
BTSC349_shFosl1	-Dox	Rep2	GAPDH	NCAM1	23.777	right
BTSC349_shFosl1	-Dox	Rep3	GAPDH	NCAM1	23.159	right
BTSC349_shFosl1	-Dox	Rep1	GAPDH	ASCL1	35.996	right
BTSC349_shFosl1	-Dox	Rep2	GAPDH	ASCL1	36.721	right
BTSC349_shFosl1	-Dox	Rep3	GAPDH	ASCL1	36.359	right
BTSC349_shFosl1	-Dox	Rep1	GAPDH	DLL3	35.586	right
BTSC349_shFosl1	-Dox	Rep2	GAPDH	DLL3	35.508	right
BTSC349_shFosl1	-Dox	Rep3	GAPDH	DLL3	35.494	right
BTSC349_shFosl1	+Dox	Rep1	GAPDH	GAPDH	15.242	right
BTSC349_shFosl1	+Dox	Rep2	GAPDH	GAPDH	14.912	right
BTSC349_shFosl1	+Dox	Rep3	GAPDH	GAPDH	14.832	right
BTSC349_shFosl1	+Dox	Rep1	GAPDH	OLIG2	33.688	right
BTSC349_shFosl1	+Dox	Rep2	GAPDH	OLIG2	34.336	right
BTSC349_shFosl1	+Dox	Rep3	GAPDH	OLIG2	34.242	right
BTSC349_shFosl1	+Dox	Rep1	GAPDH	NCAM1	23.213	right
BTSC349_shFosl1	+Dox	Rep2	GAPDH	NCAM1	23.191	right
BTSC349_shFosl1	+Dox	Rep3	GAPDH	NCAM1	23.139	right
BTSC349_shFosl1	+Dox	Rep1	GAPDH	ASCL1	35.249	right
BTSC349_shFosl1	+Dox	Rep2	GAPDH	ASCL1	NA	right
BTSC349_shFosl1	+Dox	Rep3	GAPDH	ASCL1	35.534	right
BTSC349_shFosl1	+Dox	Rep1	GAPDH	DLL3	35.16	right
BTSC349_shFosl1	+Dox	Rep2	GAPDH	DLL3	NA	right
BTSC349_shFosl1	+Dox	Rep3	GAPDH	DLL3	37.039	right

## Sheet: Figure7-S1G
# Source data Figure 7-figure supplement 1G
Sample	Treatment	day	value
shGFP	-Dox	d1	0.377
shGFP	-Dox	d1	0.416
shGFP	-Dox	d1	0.378
shGFP	-Dox	d1	0.373
shGFP	-Dox	d1	0.394
shGFP	-Dox	d1	0.313
shGFP	-Dox	d1	0.324
shGFP	-Dox	d1	0.37
shGFP	-Dox	d1	0.366
shGFP	-Dox	d1	0.376
shGFP	+Dox	d1	0.462
shGFP	+Dox	d1	0.459
shGFP	+Dox	d1	0.466
shGFP	+Dox	d1	0.442
shGFP	+Dox	d1	0.441
shGFP	+Dox	d1	0.434
shGFP	+Dox	d1	0.421
shGFP	+Dox	d1	0.447
shGFP	+Dox	d1	0.454
shGFP	+Dox	d1	0.487
shFOSL1_3	-Dox	d1	0.407
shFOSL1_3	-Dox	d1	0.384
shFOSL1_3	-Dox	d1	0.393
shFOSL1_3	-Dox	d1	0.383
shFOSL1_3	-Dox	d1	0.383
shFOSL1_3	-Dox	d1	0.377
shFOSL1_3	-Dox	d1	0.39
shFOSL1_3	-Dox	d1	0.383
shFOSL1_3	-Dox	d1	0.412
shFOSL1_3	-Dox	d1	0.408
shFOSL1_3	+Dox	d1	0.377
shFOSL1_3	+Dox	d1	0.357
shFOSL1_3	+Dox	d1	0.354
shFOSL1_3	+Dox	d1	0.334
shFOSL1_3	+Dox	d1	0.338
shFOSL1_3	+Dox	d1	0.336
shFOSL1_3	+Dox	d1	0.331
shFOSL1_3	+Dox	d1	0.332
shFOSL1_3	+Dox	d1	0.351
shFOSL1_3	+Dox	d1	0.373
shFOSL1_10	-Dox	d1	0.164
shFOSL1_10	-Dox	d1	0.139
shFOSL1_10	-Dox	d1	0.157
shFOSL1_10	-Dox	d1	0.157
shFOSL1_10	-Dox	d1	0.136
shFOSL1_10	-Dox	d1	0.159
shFOSL1_10	-Dox	d1	0.147
shFOSL1_10	-Dox	d1	0.15
shFOSL1_10	-Dox	d1	0.149
shFOSL1_10	-Dox	d1	0.155
shFOSL1_10	+Dox	d1	0.45
shFOSL1_10	+Dox	d1	0.425
shFOSL1_10	+Dox	d1	0.418
shFOSL1_10	+Dox	d1	0.412
shFOSL1_10	+Dox	d1	0.414
shFOSL1_10	+Dox	d1	0.419
shFOSL1_10	+Dox	d1	0.49
shFOSL1_10	+Dox	d1	0.431
shFOSL1_10	+Dox	d1	0.433
shFOSL1_10	+Dox	d1	0.468
shGFP	-Dox	d3	0.434
shGFP	-Dox	d3	0.419
shGFP	-Dox	d3	0.449
shGFP	-Dox	d3	0.445
shGFP	-Dox	d3	0.441
shGFP	-Dox	d3	0.483
shGFP	-Dox	d3	0.438
shGFP	-Dox	d3	0.441
shGFP	-Dox	d3	0.468
shGFP	-Dox	d3	0.495
shGFP	+Dox	d3	0.682
shGFP	+Dox	d3	0.638
shGFP	+Dox	d3	0.625
shGFP	+Dox	d3	0.611
shGFP	+Dox	d3	0.589
shGFP	+Dox	d3	0.618
shGFP	+Dox	d3	0.64
shGFP	+Dox	d3	0.628
shGFP	+Dox	d3	0.655
shGFP	+Dox	d3	0.721
shFOSL1_3	-Dox	d3	0.605
shFOSL1_3	-Dox	d3	0.556
shFOSL1_3	-Dox	d3	0.566
shFOSL1_3	-Dox	d3	0.585
shFOSL1_3	-Dox	d3	0.524
shFOSL1_3	-Dox	d3	0.534
shFOSL1_3	-Dox	d3	0.612
shFOSL1_3	-Dox	d3	NA
shFOSL1_3	-Dox	d3	0.568
shFOSL1_3	-Dox	d3	0.622
shFOSL1_3	+Dox	d3	0.422
shFOSL1_3	+Dox	d3	0.397
shFOSL1_3	+Dox	d3	0.373
shFOSL1_3	+Dox	d3	0.384
shFOSL1_3	+Dox	d3	0.38
shFOSL1_3	+Dox	d3	0.39
shFOSL1_3	+Dox	d3	0.404
shFOSL1_3	+Dox	d3	0.393
shFOSL1_3	+Dox	d3	0.417
shFOSL1_3	+Dox	d3	0.41
shFOSL1_10	-Dox	d3	0.28
shFOSL1_10	-Dox	d3	0.262
shFOSL1_10	-Dox	d3	0.257
shFOSL1_10	-Dox	d3	0.239
shFOSL1_10	-Dox	d3	0.246
shFOSL1_10	-Dox	d3	0.236
shFOSL1_10	-Dox	d3	0.246
shFOSL1_10	-Dox	d3	0.24
shFOSL1_10	-Dox	d3	0.229
shFOSL1_10	-Dox	d3	0.25
shFOSL1_10	+Dox	d3	0.399
shFOSL1_10	+Dox	d3	0.372
shFOSL1_10	+Dox	d3	0.375
shFOSL1_10	+Dox	d3	0.345
shFOSL1_10	+Dox	d3	0.356
shFOSL1_10	+Dox	d3	0.356
shFOSL1_10	+Dox	d3	0.382
shFOSL1_10	+Dox	d3	0.388
shFOSL1_10	+Dox	d3	0.382
shFOSL1_10	+Dox	d3	0.386
shGFP	-Dox	d5	0.872
shGFP	-Dox	d5	0.792
shGFP	-Dox	d5	0.766
shGFP	-Dox	d5	0.672
shGFP	-Dox	d5	0.765
shGFP	-Dox	d5	0.759
shGFP	-Dox	d5	0.78
shGFP	-Dox	d5	0.841
shGFP	-Dox	d5	0.8
shGFP	-Dox	d5	0.92
shGFP	+Dox	d5	1.08
shGFP	+Dox	d5	1.008
shGFP	+Dox	d5	0.975
shGFP	+Dox	d5	0.936
shGFP	+Dox	d5	0.939
shGFP	+Dox	d5	0.956
shGFP	+Dox	d5	0.945
shGFP	+Dox	d5	0.983
shGFP	+Dox	d5	1.045
shGFP	+Dox	d5	1.159
shFOSL1_3	-Dox	d5	1.049
shFOSL1_3	-Dox	d5	0.924
shFOSL1_3	-Dox	d5	0.864
shFOSL1_3	-Dox	d5	0.831
shFOSL1_3	-Dox	d5	0.868
shFOSL1_3	-Dox	d5	0.871
shFOSL1_3	-Dox	d5	0.869
shFOSL1_3	-Dox	d5	0.958
shFOSL1_3	-Dox	d5	0.964
shFOSL1_3	-Dox	d5	1.153
shFOSL1_3	+Dox	d5	0.458
shFOSL1_3	+Dox	d5	0.444
shFOSL1_3	+Dox	d5	0.434
shFOSL1_3	+Dox	d5	0.442
shFOSL1_3	+Dox	d5	0.429
shFOSL1_3	+Dox	d5	0.445
shFOSL1_3	+Dox	d5	0.444
shFOSL1_3	+Dox	d5	0.636
shFOSL1_3	+Dox	d5	0.462
shFOSL1_3	+Dox	d5	0.507
shFOSL1_10	-Dox	d5	0.461
shFOSL1_10	-Dox	d5	0.441
shFOSL1_10	-Dox	d5	0.418
shFOSL1_10	-Dox	d5	0.404
shFOSL1_10	-Dox	d5	0.406
shFOSL1_10	-Dox	d5	0.274
shFOSL1_10	-Dox	d5	0.415
shFOSL1_10	-Dox	d5	0.428
shFOSL1_10	-Dox	d5	0.45
shFOSL1_10	-Dox	d5	0.466
shFOSL1_10	+Dox	d5	0.457
shFOSL1_10	+Dox	d5	0.411
shFOSL1_10	+Dox	d5	0.411
shFOSL1_10	+Dox	d5	0.392
shFOSL1_10	+Dox	d5	0.439
shFOSL1_10	+Dox	d5	0.409
shFOSL1_10	+Dox	d5	0.401
shFOSL1_10	+Dox	d5	0.452
shFOSL1_10	+Dox	d5	0.428
shFOSL1_10	+Dox	d5	0.443
shGFP	-Dox	d7	1.59
shGFP	-Dox	d7	1.421
shGFP	-Dox	d7	1.409
shGFP	-Dox	d7	1.464
shGFP	-Dox	d7	1.359
shGFP	-Dox	d7	1.526
shGFP	-Dox	d7	1.466
shGFP	-Dox	d7	1.615
shGFP	-Dox	d7	NA
shGFP	-Dox	d7	NA
shGFP	+Dox	d7	1.587
shGFP	+Dox	d7	1.496
shGFP	+Dox	d7	1.434
shGFP	+Dox	d7	1.423
shGFP	+Dox	d7	1.446
shGFP	+Dox	d7	1.369
shGFP	+Dox	d7	1.416
shGFP	+Dox	d7	1.5
shGFP	+Dox	d7	1.573
shGFP	+Dox	d7	NA
shFOSL1_3	-Dox	d7	1.747
shFOSL1_3	-Dox	d7	1.462
shFOSL1_3	-Dox	d7	1.505
shFOSL1_3	-Dox	d7	1.476
shFOSL1_3	-Dox	d7	1.461
shFOSL1_3	-Dox	d7	1.449
shFOSL1_3	-Dox	d7	1.575
shFOSL1_3	-Dox	d7	1.574
shFOSL1_3	-Dox	d7	1.629
shFOSL1_3	-Dox	d7	NA
shFOSL1_3	+Dox	d7	0.594
shFOSL1_3	+Dox	d7	0.573
shFOSL1_3	+Dox	d7	0.539
shFOSL1_3	+Dox	d7	0.539
shFOSL1_3	+Dox	d7	0.532
shFOSL1_3	+Dox	d7	0.533
shFOSL1_3	+Dox	d7	0.628
shFOSL1_3	+Dox	d7	0.533
shFOSL1_3	+Dox	d7	0.558
shFOSL1_3	+Dox	d7	NA
shFOSL1_10	-Dox	d7	0.687
shFOSL1_10	-Dox	d7	0.65
shFOSL1_10	-Dox	d7	0.603
shFOSL1_10	-Dox	d7	0.594
shFOSL1_10	-Dox	d7	0.649
shFOSL1_10	-Dox	d7	0.617
shFOSL1_10	-Dox	d7	0.595
shFOSL1_10	-Dox	d7	0.617
shFOSL1_10	-Dox	d7	0.672
shFOSL1_10	-Dox	d7	NA
shFOSL1_10	+Dox	d7	0.555
shFOSL1_10	+Dox	d7	0.499
shFOSL1_10	+Dox	d7	0.499
shFOSL1_10	+Dox	d7	0.499
shFOSL1_10	+Dox	d7	0.483
shFOSL1_10	+Dox	d7	NA
shFOSL1_10	+Dox	d7	0.565
shFOSL1_10	+Dox	d7	0.474
shFOSL1_10	+Dox	d7	0.733
shFOSL1_10	+Dox	d7	NA

## Sheet: Figure7-S1I
# Source data Figure 7-figure supplement 1I
Cell_line	Group	day	value
h543	Ctrl	d1	0.056
h543	Ctrl	d1	0.056
h543	Ctrl	d1	0.057
h543	Ctrl	d1	0.056
h543	Ctrl	d1	0.059
h543	Ctrl	d1	0.055
h543	Ctrl	d1	0.06
h543	Ctrl	d1	0.062
h543	Ctrl	d1	0.061
h543	pBabe FOSL1	d1	0.062
h543	pBabe FOSL1	d1	0.057
h543	pBabe FOSL1	d1	0.059
h543	pBabe FOSL1	d1	0.059
h543	pBabe FOSL1	d1	0.06
h543	pBabe FOSL1	d1	0.058
h543	pBabe FOSL1	d1	0.055
h543	pBabe FOSL1	d1	0.055
h543	pBabe FOSL1	d1	0.058
h543	Ctrl	d3	0.105
h543	Ctrl	d3	0.1
h543	Ctrl	d3	0.102
h543	Ctrl	d3	0.103
h543	Ctrl	d3	0.101
h543	Ctrl	d3	0.105
h543	Ctrl	d3	0.096
h543	Ctrl	d3	0.103
h543	Ctrl	d3	0.099
h543	pBabe FOSL1	d3	0.112
h543	pBabe FOSL1	d3	0.102
h543	pBabe FOSL1	d3	0.112
h543	pBabe FOSL1	d3	0.102
h543	pBabe FOSL1	d3	0.104
h543	pBabe FOSL1	d3	0.113
h543	pBabe FOSL1	d3	0.103
h543	pBabe FOSL1	d3	0.11
h543	pBabe FOSL1	d3	0.113
h543	Ctrl	d5	0.224
h543	Ctrl	d5	0.222
h543	Ctrl	d5	0.254
h543	Ctrl	d5	0.227
h543	Ctrl	d5	0.241
h543	Ctrl	d5	0.253
h543	Ctrl	d5	0.255
h543	Ctrl	d5	0.227
h543	Ctrl	d5	0.25
h543	pBabe FOSL1	d5	0.24
h543	pBabe FOSL1	d5	0.231
h543	pBabe FOSL1	d5	0.232
h543	pBabe FOSL1	d5	0.217
h543	pBabe FOSL1	d5	0.231
h543	pBabe FOSL1	d5	0.228
h543	pBabe FOSL1	d5	0.231
h543	pBabe FOSL1	d5	0.245
h543	pBabe FOSL1	d5	0.239
h543	Ctrl	d7	0.575
h543	Ctrl	d7	0.553
h543	Ctrl	d7	0.6
h543	Ctrl	d7	0.563
h543	Ctrl	d7	0.59
h543	Ctrl	d7	0.588
h543	Ctrl	d7	0.58
h543	Ctrl	d7	0.551
h543	Ctrl	d7	0.538
h543	pBabe FOSL1	d7	0.518
h543	pBabe FOSL1	d7	0.499
h543	pBabe FOSL1	d7	0.53
h543	pBabe FOSL1	d7	0.487
h543	pBabe FOSL1	d7	0.528
h543	pBabe FOSL1	d7	0.561
h543	pBabe FOSL1	d7	0.546
h543	pBabe FOSL1	d7	0.539
h543	pBabe FOSL1	d7	0.507
h676	Ctrl	d1	0.055
h676	Ctrl	d1	0.055
h676	Ctrl	d1	0.055
h676	Ctrl	d1	0.054
h676	Ctrl	d1	0.053
h676	Ctrl	d1	0.053
h676	Ctrl	d1	0.054
h676	Ctrl	d1	0.054
h676	Ctrl	d1	0.058
h676	pBabe FOSL1	d1	0.059
h676	pBabe FOSL1	d1	0.056
h676	pBabe FOSL1	d1	0.065
h676	pBabe FOSL1	d1	0.06
h676	pBabe FOSL1	d1	0.062
h676	pBabe FOSL1	d1	0.059
h676	pBabe FOSL1	d1	0.058
h676	pBabe FOSL1	d1	0.06
h676	pBabe FOSL1	d1	0.056
h676	Ctrl	d3	0.189
h676	Ctrl	d3	0.182
h676	Ctrl	d3	0.184
h676	Ctrl	d3	0.175
h676	Ctrl	d3	0.187
h676	Ctrl	d3	0.193
h676	Ctrl	d3	0.17
h676	Ctrl	d3	0.198
h676	Ctrl	d3	0.174
h676	pBabe FOSL1	d3	0.211
h676	pBabe FOSL1	d3	0.19
h676	pBabe FOSL1	d3	0.203
h676	pBabe FOSL1	d3	0.2
h676	pBabe FOSL1	d3	0.216
h676	pBabe FOSL1	d3	0.196
h676	pBabe FOSL1	d3	0.203
h676	pBabe FOSL1	d3	0.203
h676	pBabe FOSL1	d3	0.194
h676	Ctrl	d5	0.586
h676	Ctrl	d5	0.615
h676	Ctrl	d5	0.627
h676	Ctrl	d5	0.599
h676	Ctrl	d5	0.653
h676	Ctrl	d5	0.56
h676	Ctrl	d5	0.539
h676	Ctrl	d5	0.606
h676	Ctrl	d5	0.594
h676	pBabe FOSL1	d5	0.649
h676	pBabe FOSL1	d5	0.59
h676	pBabe FOSL1	d5	0.649
h676	pBabe FOSL1	d5	0.634
h676	pBabe FOSL1	d5	0.653
h676	pBabe FOSL1	d5	0.596
h676	pBabe FOSL1	d5	0.644
h676	pBabe FOSL1	d5	0.659
h676	pBabe FOSL1	d5	0.598
h676	Ctrl	d7	1.05
h676	Ctrl	d7	1.142
h676	Ctrl	d7	1.221
h676	Ctrl	d7	1.002
h676	Ctrl	d7	1.163
h676	Ctrl	d7	1.139
h676	Ctrl	d7	1.163
h676	Ctrl	d7	1.166
h676	Ctrl	d7	1.061
h676	pBabe FOSL1	d7	1.285
h676	pBabe FOSL1	d7	1.436
h676	pBabe FOSL1	d7	1.255
h676	pBabe FOSL1	d7	1.367
h676	pBabe FOSL1	d7	1.278
h676	pBabe FOSL1	d7	1.394
h676	pBabe FOSL1	d7	1.331
h676	pBabe FOSL1	d7	NA
h676	pBabe FOSL1	d7	1.352

## Sheet: Figure7-S1K
# Source data Figure 7-figure supplement 1K
Cell_line	Sample	Treatment	day	value
h543	shGFP	-Dox	d1	0.124
h543	shGFP	-Dox	d1	0.123
h543	shGFP	-Dox	d1	0.123
h543	shGFP	-Dox	d1	0.118
h543	shGFP	-Dox	d1	0.122
h543	shGFP	-Dox	d1	0.117
h543	shGFP	-Dox	d1	0.12
h543	shGFP	-Dox	d1	0.12
h543	shGFP	-Dox	d1	0.126
h543	shGFP	-Dox	d1	0.127
h543	shGFP	+Dox	d1	0.11
h543	shGFP	+Dox	d1	0.105
h543	shGFP	+Dox	d1	0.105
h543	shGFP	+Dox	d1	0.108
h543	shGFP	+Dox	d1	0.107
h543	shGFP	+Dox	d1	0.106
h543	shGFP	+Dox	d1	0.109
h543	shGFP	+Dox	d1	0.115
h543	shGFP	+Dox	d1	0.117
h543	shGFP	+Dox	d1	0.127
h543	shFOSL1_3	-Dox	d1	0.064
h543	shFOSL1_3	-Dox	d1	0.059
h543	shFOSL1_3	-Dox	d1	0.057
h543	shFOSL1_3	-Dox	d1	0.058
h543	shFOSL1_3	-Dox	d1	0.059
h543	shFOSL1_3	-Dox	d1	0.059
h543	shFOSL1_3	-Dox	d1	0.061
h543	shFOSL1_3	-Dox	d1	0.059
h543	shFOSL1_3	-Dox	d1	0.058
h543	shFOSL1_3	-Dox	d1	0.063
h543	shFOSL1_3	+Dox	d1	0.114
h543	shFOSL1_3	+Dox	d1	0.106
h543	shFOSL1_3	+Dox	d1	0.096
h543	shFOSL1_3	+Dox	d1	0.104
h543	shFOSL1_3	+Dox	d1	0.101
h543	shFOSL1_3	+Dox	d1	0.109
h543	shFOSL1_3	+Dox	d1	0.095
h543	shFOSL1_3	+Dox	d1	0.097
h543	shFOSL1_3	+Dox	d1	0.101
h543	shFOSL1_3	+Dox	d1	0.108
h543	shFOSL1_10	-Dox	d1	0.143
h543	shFOSL1_10	-Dox	d1	0.138
h543	shFOSL1_10	-Dox	d1	0.135
h543	shFOSL1_10	-Dox	d1	0.127
h543	shFOSL1_10	-Dox	d1	0.134
h543	shFOSL1_10	-Dox	d1	0.13
h543	shFOSL1_10	-Dox	d1	0.13
h543	shFOSL1_10	-Dox	d1	0.127
h543	shFOSL1_10	-Dox	d1	0.139
h543	shFOSL1_10	-Dox	d1	0.142
h543	shFOSL1_10	+Dox	d1	0.096
h543	shFOSL1_10	+Dox	d1	0.102
h543	shFOSL1_10	+Dox	d1	0.098
h543	shFOSL1_10	+Dox	d1	0.099
h543	shFOSL1_10	+Dox	d1	0.101
h543	shFOSL1_10	+Dox	d1	0.104
h543	shFOSL1_10	+Dox	d1	0.105
h543	shFOSL1_10	+Dox	d1	0.105
h543	shFOSL1_10	+Dox	d1	0.097
h543	shFOSL1_10	+Dox	d1	0.095
h543	shGFP	-Dox	d3	0.278
h543	shGFP	-Dox	d3	0.271
h543	shGFP	-Dox	d3	0.26
h543	shGFP	-Dox	d3	0.261
h543	shGFP	-Dox	d3	0.261
h543	shGFP	-Dox	d3	0.256
h543	shGFP	-Dox	d3	0.265
h543	shGFP	-Dox	d3	0.275
h543	shGFP	-Dox	d3	0.284
h543	shGFP	-Dox	d3	0.274
h543	shGFP	+Dox	d3	0.228
h543	shGFP	+Dox	d3	0.219
h543	shGFP	+Dox	d3	0.212
h543	shGFP	+Dox	d3	0.212
h543	shGFP	+Dox	d3	0.212
h543	shGFP	+Dox	d3	0.214
h543	shGFP	+Dox	d3	0.216
h543	shGFP	+Dox	d3	0.234
h543	shGFP	+Dox	d3	0.208
h543	shGFP	+Dox	d3	0.236
h543	shFOSL1_3	-Dox	d3	0.137
h543	shFOSL1_3	-Dox	d3	0.126
h543	shFOSL1_3	-Dox	d3	0.129
h543	shFOSL1_3	-Dox	d3	0.126
h543	shFOSL1_3	-Dox	d3	0.13
h543	shFOSL1_3	-Dox	d3	0.126
h543	shFOSL1_3	-Dox	d3	0.123
h543	shFOSL1_3	-Dox	d3	0.134
h543	shFOSL1_3	-Dox	d3	0.127
h543	shFOSL1_3	-Dox	d3	0.126
h543	shFOSL1_3	+Dox	d3	0.221
h543	shFOSL1_3	+Dox	d3	0.215
h543	shFOSL1_3	+Dox	d3	0.192
h543	shFOSL1_3	+Dox	d3	0.224
h543	shFOSL1_3	+Dox	d3	0.21
h543	shFOSL1_3	+Dox	d3	0.211
h543	shFOSL1_3	+Dox	d3	0.207
h543	shFOSL1_3	+Dox	d3	0.212
h543	shFOSL1_3	+Dox	d3	0.219
h543	shFOSL1_3	+Dox	d3	0.226
h543	shFOSL1_10	-Dox	d3	0.286
h543	shFOSL1_10	-Dox	d3	0.275
h543	shFOSL1_10	-Dox	d3	0.267
h543	shFOSL1_10	-Dox	d3	0.26
h543	shFOSL1_10	-Dox	d3	0.286
h543	shFOSL1_10	-Dox	d3	0.238
h543	shFOSL1_10	-Dox	d3	0.258
h543	shFOSL1_10	-Dox	d3	0.266
h543	shFOSL1_10	-Dox	d3	0.256
h543	shFOSL1_10	-Dox	d3	0.288
h543	shFOSL1_10	+Dox	d3	0.23
h543	shFOSL1_10	+Dox	d3	0.217
h543	shFOSL1_10	+Dox	d3	0.217
h543	shFOSL1_10	+Dox	d3	0.211
h543	shFOSL1_10	+Dox	d3	0.2
h543	shFOSL1_10	+Dox	d3	0.209
h543	shFOSL1_10	+Dox	d3	0.213
h543	shFOSL1_10	+Dox	d3	0.222
h543	shFOSL1_10	+Dox	d3	0.227
h543	shFOSL1_10	+Dox	d3	0.228
h543	shGFP	-Dox	d5	0.571
h543	shGFP	-Dox	d5	0.544
h543	shGFP	-Dox	d5	0.519
h543	shGFP	-Dox	d5	0.496
h543	shGFP	-Dox	d5	0.516
h543	shGFP	-Dox	d5	0.519
h543	shGFP	-Dox	d5	0.492
h543	shGFP	-Dox	d5	0.494
h543	shGFP	-Dox	d5	0.504
h543	shGFP	-Dox	d5	0.558
h543	shGFP	+Dox	d5	0.487
h543	shGFP	+Dox	d5	0.461
h543	shGFP	+Dox	d5	0.432
h543	shGFP	+Dox	d5	0.44
h543	shGFP	+Dox	d5	0.454
h543	shGFP	+Dox	d5	0.479
h543	shGFP	+Dox	d5	0.487
h543	shGFP	+Dox	d5	0.458
h543	shGFP	+Dox	d5	0.503
h543	shGFP	+Dox	d5	0.52
h543	shFOSL1_3	-Dox	d5	0.283
h543	shFOSL1_3	-Dox	d5	0.277
h543	shFOSL1_3	-Dox	d5	0.237
h543	shFOSL1_3	-Dox	d5	0.26
h543	shFOSL1_3	-Dox	d5	0.274
h543	shFOSL1_3	-Dox	d5	0.278
h543	shFOSL1_3	-Dox	d5	0.27
h543	shFOSL1_3	-Dox	d5	0.264
h543	shFOSL1_3	-Dox	d5	0.298
h543	shFOSL1_3	-Dox	d5	0.312
h543	shFOSL1_3	+Dox	d5	0.471
h543	shFOSL1_3	+Dox	d5	0.47
h543	shFOSL1_3	+Dox	d5	0.461
h543	shFOSL1_3	+Dox	d5	0.469
h543	shFOSL1_3	+Dox	d5	0.473
h543	shFOSL1_3	+Dox	d5	0.443
h543	shFOSL1_3	+Dox	d5	0.473
h543	shFOSL1_3	+Dox	d5	0.48
h543	shFOSL1_3	+Dox	d5	0.465
h543	shFOSL1_3	+Dox	d5	0.501
h543	shFOSL1_10	-Dox	d5	0.65
h543	shFOSL1_10	-Dox	d5	0.624
h543	shFOSL1_10	-Dox	d5	0.557
h543	shFOSL1_10	-Dox	d5	0.558
h543	shFOSL1_10	-Dox	d5	0.542
h543	shFOSL1_10	-Dox	d5	0.523
h543	shFOSL1_10	-Dox	d5	0.472
h543	shFOSL1_10	-Dox	d5	0.5
h543	shFOSL1_10	-Dox	d5	0.515
h543	shFOSL1_10	-Dox	d5	0.542
h543	shFOSL1_10	+Dox	d5	0.464
h543	shFOSL1_10	+Dox	d5	0.433
h543	shFOSL1_10	+Dox	d5	0.428
h543	shFOSL1_10	+Dox	d5	0.41
h543	shFOSL1_10	+Dox	d5	0.421
h543	shFOSL1_10	+Dox	d5	0.442
h543	shFOSL1_10	+Dox	d5	0.447
h543	shFOSL1_10	+Dox	d5	0.437
h543	shFOSL1_10	+Dox	d5	0.457
h543	shFOSL1_10	+Dox	d5	0.466
h543	shGFP	-Dox	d7	1.168
h543	shGFP	-Dox	d7	1.146
h543	shGFP	-Dox	d7	1.209
h543	shGFP	-Dox	d7	1.148
h543	shGFP	-Dox	d7	1.161
h543	shGFP	-Dox	d7	1.161
h543	shGFP	-Dox	d7	1.166
h543	shGFP	-Dox	d7	1.185
h543	shGFP	-Dox	d7	1.194
h543	shGFP	-Dox	d7	1.226
h543	shGFP	+Dox	d7	0.965
h543	shGFP	+Dox	d7	0.925
h543	shGFP	+Dox	d7	0.906
h543	shGFP	+Dox	d7	0.917
h543	shGFP	+Dox	d7	0.902
h543	shGFP	+Dox	d7	0.865
h543	shGFP	+Dox	d7	0.902
h543	shGFP	+Dox	d7	0.891
h543	shGFP	+Dox	d7	0.957
h543	shGFP	+Dox	d7	0.972
h543	shFOSL1_3	-Dox	d7	0.707
h543	shFOSL1_3	-Dox	d7	0.731
h543	shFOSL1_3	-Dox	d7	NA
h543	shFOSL1_3	-Dox	d7	0.718
h543	shFOSL1_3	-Dox	d7	0.685
h543	shFOSL1_3	-Dox	d7	0.674
h543	shFOSL1_3	-Dox	d7	0.671
h543	shFOSL1_3	-Dox	d7	0.726
h543	shFOSL1_3	-Dox	d7	0.744
h543	shFOSL1_3	-Dox	d7	0.607
h543	shFOSL1_3	+Dox	d7	1.015
h543	shFOSL1_3	+Dox	d7	0.939
h543	shFOSL1_3	+Dox	d7	0.943
h543	shFOSL1_3	+Dox	d7	0.927
h543	shFOSL1_3	+Dox	d7	0.918
h543	shFOSL1_3	+Dox	d7	1.118
h543	shFOSL1_3	+Dox	d7	0.923
h543	shFOSL1_3	+Dox	d7	0.889
h543	shFOSL1_3	+Dox	d7	0.984
h543	shFOSL1_3	+Dox	d7	0.932
h543	shFOSL1_10	-Dox	d7	1.094
h543	shFOSL1_10	-Dox	d7	1.058
h543	shFOSL1_10	-Dox	d7	0.99
h543	shFOSL1_10	-Dox	d7	1.043
h543	shFOSL1_10	-Dox	d7	0.988
h543	shFOSL1_10	-Dox	d7	NA
h543	shFOSL1_10	-Dox	d7	1.036
h543	shFOSL1_10	-Dox	d7	1.038
h543	shFOSL1_10	-Dox	d7	1.112
h543	shFOSL1_10	-Dox	d7	1.218
h543	shFOSL1_10	+Dox	d7	0.976
h543	shFOSL1_10	+Dox	d7	0.903
h543	shFOSL1_10	+Dox	d7	0.928
h543	shFOSL1_10	+Dox	d7	0.911
h543	shFOSL1_10	+Dox	d7	0.861
h543	shFOSL1_10	+Dox	d7	0.889
h543	shFOSL1_10	+Dox	d7	0.896
h543	shFOSL1_10	+Dox	d7	0.858
h543	shFOSL1_10	+Dox	d7	0.908
h543	shFOSL1_10	+Dox	d7	0.919
h676	shGFP	-Dox	d1	0.118
h676	shGFP	-Dox	d1	0.118
h676	shGFP	-Dox	d1	0.116
h676	shGFP	-Dox	d1	0.123
h676	shGFP	-Dox	d1	0.112
h676	shGFP	-Dox	d1	0.12
h676	shGFP	-Dox	d1	0.126
h676	shGFP	-Dox	d1	0.119
h676	shGFP	-Dox	d1	0.12
h676	shGFP	-Dox	d1	0.12
h676	shGFP	+Dox	d1	0.125
h676	shGFP	+Dox	d1	0.008
h676	shGFP	+Dox	d1	0.009
h676	shGFP	+Dox	d1	0.134
h676	shGFP	+Dox	d1	0.123
h676	shGFP	+Dox	d1	0.128
h676	shGFP	+Dox	d1	0.127
h676	shGFP	+Dox	d1	0.129
h676	shGFP	+Dox	d1	0.133
h676	shGFP	+Dox	d1	0.139
h676	shFOSL1_3	-Dox	d1	0.11
h676	shFOSL1_3	-Dox	d1	0.103
h676	shFOSL1_3	-Dox	d1	0.094
h676	shFOSL1_3	-Dox	d1	0.097
h676	shFOSL1_3	-Dox	d1	0.097
h676	shFOSL1_3	-Dox	d1	0.097
h676	shFOSL1_3	-Dox	d1	0.104
h676	shFOSL1_3	-Dox	d1	0.098
h676	shFOSL1_3	-Dox	d1	0.1
h676	shFOSL1_3	-Dox	d1	0.103
h676	shFOSL1_3	+Dox	d1	0.114
h676	shFOSL1_3	+Dox	d1	0.097
h676	shFOSL1_3	+Dox	d1	0.115
h676	shFOSL1_3	+Dox	d1	0.114
h676	shFOSL1_3	+Dox	d1	0.108
h676	shFOSL1_3	+Dox	d1	0.105
h676	shFOSL1_3	+Dox	d1	0.102
h676	shFOSL1_3	+Dox	d1	0.106
h676	shFOSL1_3	+Dox	d1	0.088
h676	shFOSL1_3	+Dox	d1	0.109
h676	shFOSL1_10	-Dox	d1	0.129
h676	shFOSL1_10	-Dox	d1	0.122
h676	shFOSL1_10	-Dox	d1	0.123
h676	shFOSL1_10	-Dox	d1	0.126
h676	shFOSL1_10	-Dox	d1	0.125
h676	shFOSL1_10	-Dox	d1	0.124
h676	shFOSL1_10	-Dox	d1	0.128
h676	shFOSL1_10	-Dox	d1	0.12
h676	shFOSL1_10	-Dox	d1	0.126
h676	shFOSL1_10	-Dox	d1	0.131
h676	shFOSL1_10	+Dox	d1	0.122
h676	shFOSL1_10	+Dox	d1	0.128
h676	shFOSL1_10	+Dox	d1	0.118
h676	shFOSL1_10	+Dox	d1	0.12
h676	shFOSL1_10	+Dox	d1	0.121
h676	shFOSL1_10	+Dox	d1	0.123
h676	shFOSL1_10	+Dox	d1	0.126
h676	shFOSL1_10	+Dox	d1	0.125
h676	shFOSL1_10	+Dox	d1	0.121
h676	shFOSL1_10	+Dox	d1	0.129
h676	shGFP	-Dox	d3	0.488
h676	shGFP	-Dox	d3	0.425
h676	shGFP	-Dox	d3	0.459
h676	shGFP	-Dox	d3	0.454
h676	shGFP	-Dox	d3	0.437
h676	shGFP	-Dox	d3	0.444
h676	shGFP	-Dox	d3	0.455
h676	shGFP	-Dox	d3	0.449
h676	shGFP	-Dox	d3	0.468
h676	shGFP	-Dox	d3	0.439
h676	shGFP	+Dox	d3	0.445
h676	shGFP	+Dox	d3	0.429
h676	shGFP	+Dox	d3	0.442
h676	shGFP	+Dox	d3	0.438
h676	shGFP	+Dox	d3	0.432
h676	shGFP	+Dox	d3	0.421
h676	shGFP	+Dox	d3	0.415
h676	shGFP	+Dox	d3	0.439
h676	shGFP	+Dox	d3	0.453
h676	shGFP	+Dox	d3	0.447
h676	shFOSL1_3	-Dox	d3	0.381
h676	shFOSL1_3	-Dox	d3	0.377
h676	shFOSL1_3	-Dox	d3	0.389
h676	shFOSL1_3	-Dox	d3	0.382
h676	shFOSL1_3	-Dox	d3	0.38
h676	shFOSL1_3	-Dox	d3	0.407
h676	shFOSL1_3	-Dox	d3	0.404
h676	shFOSL1_3	-Dox	d3	0.402
h676	shFOSL1_3	-Dox	d3	0.379
h676	shFOSL1_3	-Dox	d3	0.408
h676	shFOSL1_3	+Dox	d3	0.423
h676	shFOSL1_3	+Dox	d3	0.408
h676	shFOSL1_3	+Dox	d3	0.403
h676	shFOSL1_3	+Dox	d3	0.401
h676	shFOSL1_3	+Dox	d3	0.378
h676	shFOSL1_3	+Dox	d3	0.385
h676	shFOSL1_3	+Dox	d3	0.397
h676	shFOSL1_3	+Dox	d3	0.406
h676	shFOSL1_3	+Dox	d3	0.398
h676	shFOSL1_3	+Dox	d3	0.431
h676	shFOSL1_10	-Dox	d3	0.519
h676	shFOSL1_10	-Dox	d3	0.527
h676	shFOSL1_10	-Dox	d3	0.514
h676	shFOSL1_10	-Dox	d3	0.492
h676	shFOSL1_10	-Dox	d3	0.509
h676	shFOSL1_10	-Dox	d3	0.498
h676	shFOSL1_10	-Dox	d3	0.508
h676	shFOSL1_10	-Dox	d3	0.538
h676	shFOSL1_10	-Dox	d3	0.525
h676	shFOSL1_10	-Dox	d3	0.549
h676	shFOSL1_10	+Dox	d3	0.483
h676	shFOSL1_10	+Dox	d3	0.47
h676	shFOSL1_10	+Dox	d3	0.47
h676	shFOSL1_10	+Dox	d3	0.45
h676	shFOSL1_10	+Dox	d3	0.459
h676	shFOSL1_10	+Dox	d3	0.456
h676	shFOSL1_10	+Dox	d3	0.502
h676	shFOSL1_10	+Dox	d3	0.477
h676	shFOSL1_10	+Dox	d3	0.455
h676	shFOSL1_10	+Dox	d3	0.487
h676	shGFP	-Dox	d5	0.954
h676	shGFP	-Dox	d5	1.11
h676	shGFP	-Dox	d5	1.028
h676	shGFP	-Dox	d5	1.056
h676	shGFP	-Dox	d5	0.993
h676	shGFP	-Dox	d5	1.046
h676	shGFP	-Dox	d5	1.019
h676	shGFP	-Dox	d5	0.965
h676	shGFP	-Dox	d5	1.016
h676	shGFP	-Dox	d5	1.01
h676	shGFP	+Dox	d5	0.926
h676	shGFP	+Dox	d5	0.9
h676	shGFP	+Dox	d5	0.861
h676	shGFP	+Dox	d5	0.806
h676	shGFP	+Dox	d5	0.816
h676	shGFP	+Dox	d5	0.854
h676	shGFP	+Dox	d5	0.805
h676	shGFP	+Dox	d5	0.916
h676	shGFP	+Dox	d5	0.924
h676	shGFP	+Dox	d5	0.907
h676	shFOSL1_3	-Dox	d5	1.013
h676	shFOSL1_3	-Dox	d5	0.923
h676	shFOSL1_3	-Dox	d5	0.923
h676	shFOSL1_3	-Dox	d5	0.956
h676	shFOSL1_3	-Dox	d5	1.033
h676	shFOSL1_3	-Dox	d5	0.966
h676	shFOSL1_3	-Dox	d5	0.937
h676	shFOSL1_3	-Dox	d5	0.995
h676	shFOSL1_3	-Dox	d5	0.991
h676	shFOSL1_3	-Dox	d5	1.019
h676	shFOSL1_3	+Dox	d5	0.907
h676	shFOSL1_3	+Dox	d5	0.896
h676	shFOSL1_3	+Dox	d5	0.853
h676	shFOSL1_3	+Dox	d5	0.861
h676	shFOSL1_3	+Dox	d5	0.866
h676	shFOSL1_3	+Dox	d5	0.857
h676	shFOSL1_3	+Dox	d5	0.856
h676	shFOSL1_3	+Dox	d5	0.861
h676	shFOSL1_3	+Dox	d5	0.835
h676	shFOSL1_3	+Dox	d5	0.933
h676	shFOSL1_10	-Dox	d5	1.166
h676	shFOSL1_10	-Dox	d5	1.32
h676	shFOSL1_10	-Dox	d5	1.249
h676	shFOSL1_10	-Dox	d5	1.218
h676	shFOSL1_10	-Dox	d5	1.291
h676	shFOSL1_10	-Dox	d5	1.176
h676	shFOSL1_10	-Dox	d5	1.251
h676	shFOSL1_10	-Dox	d5	1.232
h676	shFOSL1_10	-Dox	d5	1.181
h676	shFOSL1_10	-Dox	d5	1.211
h676	shFOSL1_10	+Dox	d5	1.041
h676	shFOSL1_10	+Dox	d5	0.995
h676	shFOSL1_10	+Dox	d5	0.993
h676	shFOSL1_10	+Dox	d5	1.03
h676	shFOSL1_10	+Dox	d5	0.978
h676	shFOSL1_10	+Dox	d5	1.035
h676	shFOSL1_10	+Dox	d5	1.009
h676	shFOSL1_10	+Dox	d5	0.984
h676	shFOSL1_10	+Dox	d5	1.002
h676	shFOSL1_10	+Dox	d5	0.989
h676	shGFP	-Dox	d7	1.624
h676	shGFP	-Dox	d7	1.612
h676	shGFP	-Dox	d7	1.676
h676	shGFP	-Dox	d7	1.739
h676	shGFP	-Dox	d7	1.658
h676	shGFP	-Dox	d7	1.668
h676	shGFP	-Dox	d7	1.66
h676	shGFP	-Dox	d7	1.7
h676	shGFP	-Dox	d7	1.709
h676	shGFP	-Dox	d7	1.681
h676	shGFP	+Dox	d7	1.267
h676	shGFP	+Dox	d7	1.4
h676	shGFP	+Dox	d7	1.252
h676	shGFP	+Dox	d7	1.341
h676	shGFP	+Dox	d7	1.347
h676	shGFP	+Dox	d7	1.182
h676	shGFP	+Dox	d7	1.357
h676	shGFP	+Dox	d7	1.296
h676	shGFP	+Dox	d7	1.358
h676	shGFP	+Dox	d7	1.267
h676	shFOSL1_3	-Dox	d7	1.639
h676	shFOSL1_3	-Dox	d7	1.748
h676	shFOSL1_3	-Dox	d7	1.826
h676	shFOSL1_3	-Dox	d7	1.827
h676	shFOSL1_3	-Dox	d7	1.798
h676	shFOSL1_3	-Dox	d7	1.686
h676	shFOSL1_3	-Dox	d7	1.759
h676	shFOSL1_3	-Dox	d7	1.774
h676	shFOSL1_3	-Dox	d7	1.672
h676	shFOSL1_3	-Dox	d7	1.664
h676	shFOSL1_3	+Dox	d7	1.314
h676	shFOSL1_3	+Dox	d7	1.328
h676	shFOSL1_3	+Dox	d7	1.27
h676	shFOSL1_3	+Dox	d7	1.316
h676	shFOSL1_3	+Dox	d7	1.221
h676	shFOSL1_3	+Dox	d7	1.256
h676	shFOSL1_3	+Dox	d7	1.332
h676	shFOSL1_3	+Dox	d7	1.321
h676	shFOSL1_3	+Dox	d7	1.207
h676	shFOSL1_3	+Dox	d7	1.175
h676	shFOSL1_10	-Dox	d7	1.946
h676	shFOSL1_10	-Dox	d7	1.959
h676	shFOSL1_10	-Dox	d7	1.985
h676	shFOSL1_10	-Dox	d7	2.03
h676	shFOSL1_10	-Dox	d7	2.027
h676	shFOSL1_10	-Dox	d7	2.033
h676	shFOSL1_10	-Dox	d7	2.005
h676	shFOSL1_10	-Dox	d7	2.028
h676	shFOSL1_10	-Dox	d7	2.151
h676	shFOSL1_10	-Dox	d7	1.962
h676	shFOSL1_10	+Dox	d7	1.474
h676	shFOSL1_10	+Dox	d7	1.522
h676	shFOSL1_10	+Dox	d7	1.538
h676	shFOSL1_10	+Dox	d7	1.547
h676	shFOSL1_10	+Dox	d7	1.569
h676	shFOSL1_10	+Dox	d7	1.479
h676	shFOSL1_10	+Dox	d7	1.512
h676	shFOSL1_10	+Dox	d7	1.445
h676	shFOSL1_10	+Dox	d7	1.502
h676	shFOSL1_10	+Dox	d7	1.474
