# Supplementary material for: NF1 regulates mesenchymal glioblastoma plasticity and aggressiveness through the AP-1 transcription factor FOSL1
Source: eLife. 2021 Aug 17;10:e64846. doi: 10.7554/eLife.64846 (PMC8370767; doi:10.7554/eLife.64846)
Supplement: Figure 7—source data 3. [file elife-64846-fig7-data3.xlsx]

## Sheet: Figure_7C
# Source_Data_Figure_7C
Sample	Treatment	day	value
shGFP	-Dox	d1	0.131
shGFP	-Dox	d1	0.141
shGFP	-Dox	d1	0.154
shGFP	-Dox	d1	0.163
shGFP	-Dox	d1	0.154
shGFP	-Dox	d1	0.148
shGFP	-Dox	d1	0.148
shGFP	-Dox	d1	0.149
shGFP	-Dox	d1	0.156
shGFP	-Dox	d1	0.153
shGFP	-Dox	d1	0.162
shGFP	-Dox	d1	0.162
shGFP	-Dox	d1	0.151
shGFP	-Dox	d1	0.146
shGFP	-Dox	d1	0.156
shGFP	+Dox	d1	0.151
shGFP	+Dox	d1	0.146
shGFP	+Dox	d1	0.145
shGFP	+Dox	d1	0.15
shGFP	+Dox	d1	0.166
shGFP	+Dox	d1	0.15
shGFP	+Dox	d1	0.16
shGFP	+Dox	d1	0.15
shGFP	+Dox	d1	0.144
shGFP	+Dox	d1	0.151
shGFP	+Dox	d1	0.153
shGFP	+Dox	d1	0.145
shGFP	+Dox	d1	0.141
shGFP	+Dox	d1	0.15
shGFP	+Dox	d1	0.144
shFOSL1_3	-Dox	d1	0.127
shFOSL1_3	-Dox	d1	0.129
shFOSL1_3	-Dox	d1	0.127
shFOSL1_3	-Dox	d1	0.126
shFOSL1_3	-Dox	d1	0.12
shFOSL1_3	-Dox	d1	0.116
shFOSL1_3	-Dox	d1	0.124
shFOSL1_3	-Dox	d1	0.124
shFOSL1_3	-Dox	d1	0.123
shFOSL1_3	-Dox	d1	0.117
shFOSL1_3	-Dox	d1	0.13
shFOSL1_3	-Dox	d1	0.124
shFOSL1_3	-Dox	d1	0.128
shFOSL1_3	-Dox	d1	0.125
shFOSL1_3	-Dox	d1	0.121
shFOSL1_3	+Dox	d1	0.147
shFOSL1_3	+Dox	d1	0.147
shFOSL1_3	+Dox	d1	0.146
shFOSL1_3	+Dox	d1	0.152
shFOSL1_3	+Dox	d1	0.162
shFOSL1_3	+Dox	d1	0.151
shFOSL1_3	+Dox	d1	0.147
shFOSL1_3	+Dox	d1	0.143
shFOSL1_3	+Dox	d1	0.155
shFOSL1_3	+Dox	d1	0.146
shFOSL1_3	+Dox	d1	0.145
shFOSL1_3	+Dox	d1	0.145
shFOSL1_3	+Dox	d1	0.138
shFOSL1_3	+Dox	d1	0.139
shFOSL1_3	+Dox	d1	0.164
shFOSL1_10	-Dox	d1	0.169
shFOSL1_10	-Dox	d1	0.166
shFOSL1_10	-Dox	d1	0.165
shFOSL1_10	-Dox	d1	0.164
shFOSL1_10	-Dox	d1	0.164
shFOSL1_10	-Dox	d1	0.166
shFOSL1_10	-Dox	d1	0.158
shFOSL1_10	-Dox	d1	0.162
shFOSL1_10	-Dox	d1	0.161
shFOSL1_10	-Dox	d1	0.158
shFOSL1_10	-Dox	d1	0.165
shFOSL1_10	-Dox	d1	0.155
shFOSL1_10	-Dox	d1	0.146
shFOSL1_10	-Dox	d1	0.147
shFOSL1_10	-Dox	d1	0.157
shFOSL1_10	+Dox	d1	0.173
shFOSL1_10	+Dox	d1	0.179
shFOSL1_10	+Dox	d1	0.169
shFOSL1_10	+Dox	d1	0.179
shFOSL1_10	+Dox	d1	0.179
shFOSL1_10	+Dox	d1	0.186
shFOSL1_10	+Dox	d1	0.177
shFOSL1_10	+Dox	d1	0.178
shFOSL1_10	+Dox	d1	0.175
shFOSL1_10	+Dox	d1	0.188
shFOSL1_10	+Dox	d1	0.169
shFOSL1_10	+Dox	d1	0.173
shFOSL1_10	+Dox	d1	0.165
shFOSL1_10	+Dox	d1	0.174
shFOSL1_10	+Dox	d1	0.157
shGFP	-Dox	d3	0.214
shGFP	-Dox	d3	0.222
shGFP	-Dox	d3	0.213
shGFP	-Dox	d3	0.21
shGFP	-Dox	d3	0.207
shGFP	-Dox	d3	0.204
shGFP	-Dox	d3	0.189
shGFP	-Dox	d3	0.188
shGFP	-Dox	d3	0.193
shGFP	-Dox	d3	0.21
shGFP	-Dox	d3	0.217
shGFP	-Dox	d3	0.214
shGFP	-Dox	d3	0.224
shGFP	-Dox	d3	0.201
shGFP	-Dox	d3	0.188
shGFP	+Dox	d3	0.24
shGFP	+Dox	d3	0.243
shGFP	+Dox	d3	0.236
shGFP	+Dox	d3	0.202
shGFP	+Dox	d3	0.235
shGFP	+Dox	d3	0.231
shGFP	+Dox	d3	0.23
shGFP	+Dox	d3	0.261
shGFP	+Dox	d3	0.242
shGFP	+Dox	d3	0.249
shGFP	+Dox	d3	0.239
shGFP	+Dox	d3	0.24
shGFP	+Dox	d3	0.24
shGFP	+Dox	d3	0.221
shGFP	+Dox	d3	0.252
shFOSL1_3	-Dox	d3	0.209
shFOSL1_3	-Dox	d3	0.214
shFOSL1_3	-Dox	d3	0.188
shFOSL1_3	-Dox	d3	0.202
shFOSL1_3	-Dox	d3	0.198
shFOSL1_3	-Dox	d3	0.198
shFOSL1_3	-Dox	d3	0.2
shFOSL1_3	-Dox	d3	0.203
shFOSL1_3	-Dox	d3	0.21
shFOSL1_3	-Dox	d3	0.208
shFOSL1_3	-Dox	d3	0.227
shFOSL1_3	-Dox	d3	0.234
shFOSL1_3	-Dox	d3	0.218
shFOSL1_3	-Dox	d3	0.22
shFOSL1_3	-Dox	d3	0.25
shFOSL1_3	+Dox	d3	0.21
shFOSL1_3	+Dox	d3	0.221
shFOSL1_3	+Dox	d3	0.214
shFOSL1_3	+Dox	d3	0.189
shFOSL1_3	+Dox	d3	0.213
shFOSL1_3	+Dox	d3	0.209
shFOSL1_3	+Dox	d3	0.21
shFOSL1_3	+Dox	d3	0.215
shFOSL1_3	+Dox	d3	0.217
shFOSL1_3	+Dox	d3	0.221
shFOSL1_3	+Dox	d3	0.157
shFOSL1_3	+Dox	d3	0.205
shFOSL1_3	+Dox	d3	0.209
shFOSL1_3	+Dox	d3	0.216
shFOSL1_3	+Dox	d3	0.195
shFOSL1_10	-Dox	d3	0.223
shFOSL1_10	-Dox	d3	0.221
shFOSL1_10	-Dox	d3	0.206
shFOSL1_10	-Dox	d3	0.224
shFOSL1_10	-Dox	d3	0.226
shFOSL1_10	-Dox	d3	0.206
shFOSL1_10	-Dox	d3	0.198
shFOSL1_10	-Dox	d3	0.2
shFOSL1_10	-Dox	d3	0.221
shFOSL1_10	-Dox	d3	0.221
shFOSL1_10	-Dox	d3	0.223
shFOSL1_10	-Dox	d3	0.212
shFOSL1_10	-Dox	d3	0.197
shFOSL1_10	-Dox	d3	0.201
shFOSL1_10	-Dox	d3	0.205
shFOSL1_10	+Dox	d3	0.207
shFOSL1_10	+Dox	d3	0.219
shFOSL1_10	+Dox	d3	0.204
shFOSL1_10	+Dox	d3	0.21
shFOSL1_10	+Dox	d3	0.191
shFOSL1_10	+Dox	d3	0.202
shFOSL1_10	+Dox	d3	0.201
shFOSL1_10	+Dox	d3	0.199
shFOSL1_10	+Dox	d3	0.202
shFOSL1_10	+Dox	d3	0.196
shFOSL1_10	+Dox	d3	0.202
shFOSL1_10	+Dox	d3	0.201
shFOSL1_10	+Dox	d3	0.216
shFOSL1_10	+Dox	d3	0.212
shFOSL1_10	+Dox	d3	0.221
shGFP	-Dox	d5	0.319
shGFP	-Dox	d5	0.279
shGFP	-Dox	d5	0.266
shGFP	-Dox	d5	0.258
shGFP	-Dox	d5	0.281
shGFP	-Dox	d5	0.232
shGFP	-Dox	d5	0.24
shGFP	-Dox	d5	0.23
shGFP	-Dox	d5	0.222
shGFP	-Dox	d5	0.276
shGFP	-Dox	d5	0.284
shGFP	-Dox	d5	0.234
shGFP	-Dox	d5	0.239
shGFP	-Dox	d5	0.254
shGFP	-Dox	d5	0.26
shGFP	+Dox	d5	0.383
shGFP	+Dox	d5	0.342
shGFP	+Dox	d5	0.364
shGFP	+Dox	d5	0.279
shGFP	+Dox	d5	0.395
shGFP	+Dox	d5	0.314
shGFP	+Dox	d5	0.334
shGFP	+Dox	d5	0.314
shGFP	+Dox	d5	0.343
shGFP	+Dox	d5	0.328
shGFP	+Dox	d5	0.314
shGFP	+Dox	d5	0.306
shGFP	+Dox	d5	0.342
shGFP	+Dox	d5	0.332
shGFP	+Dox	d5	0.305
shFOSL1_3	-Dox	d5	0.243
shFOSL1_3	-Dox	d5	0.224
shFOSL1_3	-Dox	d5	0.205
shFOSL1_3	-Dox	d5	0.254
shFOSL1_3	-Dox	d5	0.226
shFOSL1_3	-Dox	d5	0.201
shFOSL1_3	-Dox	d5	0.229
shFOSL1_3	-Dox	d5	0.196
shFOSL1_3	-Dox	d5	0.246
shFOSL1_3	-Dox	d5	0.21
shFOSL1_3	-Dox	d5	0.218
shFOSL1_3	-Dox	d5	0.213
shFOSL1_3	-Dox	d5	0.221
shFOSL1_3	-Dox	d5	0.211
shFOSL1_3	-Dox	d5	0.226
shFOSL1_3	+Dox	d5	0.184
shFOSL1_3	+Dox	d5	0.182
shFOSL1_3	+Dox	d5	0.191
shFOSL1_3	+Dox	d5	0.194
shFOSL1_3	+Dox	d5	0.206
shFOSL1_3	+Dox	d5	0.158
shFOSL1_3	+Dox	d5	0.178
shFOSL1_3	+Dox	d5	0.176
shFOSL1_3	+Dox	d5	0.165
shFOSL1_3	+Dox	d5	0.17
shFOSL1_3	+Dox	d5	0.141
shFOSL1_3	+Dox	d5	0.147
shFOSL1_3	+Dox	d5	0.163
shFOSL1_3	+Dox	d5	0.175
shFOSL1_3	+Dox	d5	0.167
shFOSL1_10	-Dox	d5	0.324
shFOSL1_10	-Dox	d5	0.338
shFOSL1_10	-Dox	d5	0.305
shFOSL1_10	-Dox	d5	0.304
shFOSL1_10	-Dox	d5	0.288
shFOSL1_10	-Dox	d5	0.298
shFOSL1_10	-Dox	d5	0.298
shFOSL1_10	-Dox	d5	0.263
shFOSL1_10	-Dox	d5	0.31
shFOSL1_10	-Dox	d5	0.283
shFOSL1_10	-Dox	d5	0.307
shFOSL1_10	-Dox	d5	0.288
shFOSL1_10	-Dox	d5	0.295
shFOSL1_10	-Dox	d5	0.274
shFOSL1_10	-Dox	d5	0.278
shFOSL1_10	+Dox	d5	0.199
shFOSL1_10	+Dox	d5	0.192
shFOSL1_10	+Dox	d5	0.186
shFOSL1_10	+Dox	d5	0.182
shFOSL1_10	+Dox	d5	0.177
shFOSL1_10	+Dox	d5	0.194
shFOSL1_10	+Dox	d5	0.158
shFOSL1_10	+Dox	d5	0.186
shFOSL1_10	+Dox	d5	0.167
shFOSL1_10	+Dox	d5	0.184
shFOSL1_10	+Dox	d5	0.163
shFOSL1_10	+Dox	d5	0.172
shFOSL1_10	+Dox	d5	0.163
shFOSL1_10	+Dox	d5	0.167
shFOSL1_10	+Dox	d5	0.193
shGFP	-Dox	d7	0.471
shGFP	-Dox	d7	0.471
shGFP	-Dox	d7	0.469
shGFP	-Dox	d7	0.48
shGFP	-Dox	d7	0.415
shGFP	-Dox	d7	0.457
shGFP	-Dox	d7	0.427
shGFP	-Dox	d7	0.422
shGFP	-Dox	d7	0.431
shGFP	-Dox	d7	0.442
shGFP	-Dox	d7	0.535
shGFP	-Dox	d7	0.473
shGFP	-Dox	d7	0.445
shGFP	-Dox	d7	0.383
shGFP	-Dox	d7	0.387
shGFP	+Dox	d7	0.574
shGFP	+Dox	d7	0.505
shGFP	+Dox	d7	0.526
shGFP	+Dox	d7	0.514
shGFP	+Dox	d7	0.563
shGFP	+Dox	d7	0.446
shGFP	+Dox	d7	0.519
shGFP	+Dox	d7	0.506
shGFP	+Dox	d7	0.574
shGFP	+Dox	d7	0.596
shGFP	+Dox	d7	0.446
shGFP	+Dox	d7	0.553
shGFP	+Dox	d7	0.521
shGFP	+Dox	d7	0.504
shGFP	+Dox	d7	0.546
shFOSL1_3	-Dox	d7	0.381
shFOSL1_3	-Dox	d7	0.458
shFOSL1_3	-Dox	d7	0.434
shFOSL1_3	-Dox	d7	0.394
shFOSL1_3	-Dox	d7	0.376
shFOSL1_3	-Dox	d7	0.375
shFOSL1_3	-Dox	d7	0.364
shFOSL1_3	-Dox	d7	0.445
shFOSL1_3	-Dox	d7	0.366
shFOSL1_3	-Dox	d7	0.376
shFOSL1_3	-Dox	d7	0.312
shFOSL1_3	-Dox	d7	0.428
shFOSL1_3	-Dox	d7	0.365
shFOSL1_3	-Dox	d7	0.309
shFOSL1_3	-Dox	d7	0.336
shFOSL1_3	+Dox	d7	0.162
shFOSL1_3	+Dox	d7	0.159
shFOSL1_3	+Dox	d7	0.175
shFOSL1_3	+Dox	d7	0.167
shFOSL1_3	+Dox	d7	0.182
shFOSL1_3	+Dox	d7	0.196
shFOSL1_3	+Dox	d7	0.192
shFOSL1_3	+Dox	d7	0.173
shFOSL1_3	+Dox	d7	0.213
shFOSL1_3	+Dox	d7	0.206
shFOSL1_3	+Dox	d7	0.179
shFOSL1_3	+Dox	d7	0.174
shFOSL1_3	+Dox	d7	0.157
shFOSL1_3	+Dox	d7	0.171
shFOSL1_3	+Dox	d7	0.171
shFOSL1_10	-Dox	d7	0.725
shFOSL1_10	-Dox	d7	0.625
shFOSL1_10	-Dox	d7	0.646
shFOSL1_10	-Dox	d7	0.537
shFOSL1_10	-Dox	d7	0.664
shFOSL1_10	-Dox	d7	0.622
shFOSL1_10	-Dox	d7	0.594
shFOSL1_10	-Dox	d7	0.521
shFOSL1_10	-Dox	d7	0.51
shFOSL1_10	-Dox	d7	0.599
shFOSL1_10	-Dox	d7	0.659
shFOSL1_10	-Dox	d7	0.519
shFOSL1_10	-Dox	d7	0.568
shFOSL1_10	-Dox	d7	0.625
shFOSL1_10	-Dox	d7	0.527
shFOSL1_10	+Dox	d7	0.206
shFOSL1_10	+Dox	d7	0.2
shFOSL1_10	+Dox	d7	0.219
shFOSL1_10	+Dox	d7	0.217
shFOSL1_10	+Dox	d7	0.215
shFOSL1_10	+Dox	d7	0.185
shFOSL1_10	+Dox	d7	0.187
shFOSL1_10	+Dox	d7	0.199
shFOSL1_10	+Dox	d7	0.195
shFOSL1_10	+Dox	d7	0.223
shFOSL1_10	+Dox	d7	0.187
shFOSL1_10	+Dox	d7	0.177
shFOSL1_10	+Dox	d7	0.187
shFOSL1_10	+Dox	d7	0.183
shFOSL1_10	+Dox	d7	0.198

## Sheet: Figure_7D
# Source_Data_Figure_7D
Sample	Treatment	BrdU	G1	S	G2	Exp
shGFP	-Dox	32.4	40.7	30.9	25.6	PK19-61
shGFP	-Dox	29.5	45.8	26.9	22.5	PK19-61
shGFP	-Dox	20.3	NA	NA	NA	PK20-08
shGFP	+Dox	32.2	35.6	30.6	30.7	PK19-61
shGFP	+Dox	31.3	40.3	29.6	27	PK19-61
shGFP	+Dox	19.7	NA	NA	NA	PK20-08
shFOSL1_3	-Dox	38.4	32	36.4	28.3	PK19-61
shFOSL1_3	-Dox	31.1	45.3	29.6	22.4	PK19-61
shFOSL1_3	-Dox	17.8	NA	NA	NA	PK20-08
shFOSL1_3	+Dox	12.5	55.8	11.6	30.2	PK19-61
shFOSL1_3	+Dox	11.2	61.2	10.5	26.4	PK19-61
shFOSL1_3	+Dox	12.8	NA	NA	NA	PK20-08
shFOSL1_10	-Dox	21.7	59.2	18.9	18.1	PK19-61
shFOSL1_10	-Dox	28.4	46.6	16.7	24	PK19-61
shFOSL1_10	-Dox	18.4	NA	NA	NA	PK20-08
shFOSL1_10	+Dox	10.9	50.5	9.84	36.3	PK19-61
shFOSL1_10	+Dox	11.7	44.3	10.7	41.4	PK19-61
shFOSL1_10	+Dox	9.82	NA	NA	NA	PK20-08

## Sheet: Figure_7E
# Source_Data_Figure_7E
shRNA	Group	Dose	Tested	Response
shGFP	shGFP-DOX	20	47	47
shGFP	shGFP-DOX	10	48	46
shGFP	shGFP-DOX	5	48	37
shGFP	shGFP-DOX	2	48	17
shGFP	shGFP+DOX	20	47	47
shGFP	shGFP+DOX	15	48	48
shGFP	shGFP+DOX	5	48	40
shGFP	shGFP+DOX	2	48	14
shFOSL1_3	shFOSL1_3-DOX	20	46	46
shFOSL1_3	shFOSL1_3-DOX	10	48	44
shFOSL1_3	shFOSL1_3-DOX	5	48	30
shFOSL1_3	shFOSL1_3-DOX	2	48	19
shFOSL1_3	shFOSL1_3+DOX	20	46	46
shFOSL1_3	shFOSL1_3+DOX	15	48	44
shFOSL1_3	shFOSL1_3+DOX	5	48	19
shFOSL1_3	shFOSL1_3+DOX	2	48	2
shFOSL1_10	shFOSL1_10-DOX	20	46	46
shFOSL1_10	shFOSL1_10-DOX	10	48	44
shFOSL1_10	shFOSL1_10-DOX	5	48	29
shFOSL1_10	shFOSL1_10-DOX	2	48	4
shFOSL1_10	shFOSL1_10+DOX	20	46	45
shFOSL1_10	shFOSL1_10+DOX	15	48	38
shFOSL1_10	shFOSL1_10+DOX	5	48	8
shFOSL1_10	shFOSL1_10+DOX	2	48	1

## Sheet: Figure_7F
# Source_Data_Figure_7F
Probe	Chromosome	Start	End	Probe.Strand	Feature	ID	Description	Feature.Strand	Type	Feature.Orientation	Distance	GSC1	GSC10	GSC16	GSC17	GSC18	GSC22	GSC3	GSC33	GSC36	GSC4	GSC40	GSC41	GSC5	GSC7	GSC19	GSC20	GSC35	GSC14	GSC27	GSC43
Chr1:713551-714450	1	713551	714450	NA	null					Not found	0	8.45035	8.37058	8.09267	6.9028	7.85175	8.11679	8.16817	8.38899	8.74472	8.22457	8.60736	7.60953	8.22734	8.37843	8.3029	7.99498	7.54183	7.80955	8.01626	8.50867
Chr1:805201-805500	1	805201	805500	NA	null					Not found	0	3.62592	4.29163	2.20393	2.59902	2.58496	1.40943	3.70056	3.81914	4.04428	1.97664	3.44189	0.739163	4.82135	5.0565	2.8004	3.94186	0.293905	0.434509	3.31582	6.01929
Chr1:900601-903000	1	900601	903000	NA	PLEKHN1-001	ENSP00000368720	pleckstrin homology domain containing, family N member 1 [Source:HGNC Symbol;Acc:25284]	+	CDS	overlapping	0	7.32636	4.55466	7.81126	8.08283	9.25739	7.90128	7.6313	8.47735	6.2142	6.10592	9.62512	7.97757	8.12878	6.3921	9.16963	9.79984	7.8017	4.60443	7.15713	8.17683
Chr1:910651-912150	1	910651	912150	NA	C1orf170-001	ENSP00000343864	chromosome 1 open reading frame 170 [Source:HGNC Symbol;Acc:28208]	-	CDS	overlapping	0	6.59554	6.85234	6.64687	6.27144	6.97728	5.69483	6.91002	6.79642	7.2142	5.83462	4.91582	3.06109	7.40631	6.68655	6.9968	6.80976	3.10126	5.95807	7.33077	7.44813
Chr1:939901-942750	1	939901	942750	NA	HES4-002	ENSP00000393198	hairy and enhancer of split 4 (Drosophila) [Source:HGNC Symbol;Acc:24149]	-	CDS	downstream	4548	8.78915	9.6908	6.37385	6.93887	7.58496	7.24232	8.04041	5.98906	7.08867	7.80953	5.97241	6.62181	8.8788	8.37843	6.51922	7.82939	6.63376	8.17598	6.95968	10.1198
Chr1:959401-960900	1	959401	960900	NA	AGRN-001	ENSP00000368678	agrin [Source:HGNC Symbol;Acc:329]	+	CDS	overlapping	0	7.54875	9.2318	6.48933	7.34048	8.42626	4.21679	7.98597	6.72603	5.95117	8.39449	5.55737	6.09672	8.08438	7.52216	6.42489	8.6914	5.38137	5.56379	6.53822	9.09364
Chr1:998401-1000350	1	998401	1000350	NA	null					Not found	0	5.99515	6.42913	8.54822	7.49383	9.783	5.99439	6.60745	9.02859	5.2142	5.83462	8.80335	7.88891	6.4767	5.52216	8.47753	9.43051	7.54183	6.82683	5.94032	8.07374
Chr1:1008451-1010550	1	1008451	1010550	NA	RNF223-201	ENSP00000410533	ring finger protein 223 [Source:HGNC Symbol;Acc:40020]	-	CDS	downstream	505	5.50039	6.17915	5.24832	2.92094	5	4.40943	5.87049	5.62649	4.36621	4.88353	4.91582	3.06109	5.3574	4.98611	4.85929	5.61994	3.87887	4.95807	4.73086	6.6764
Chr1:1014451-1016100	1	1014451	1016100	NA	C1orf159-002	ENSP00000368644	chromosome 1 open reading frame 159 [Source:HGNC Symbol;Acc:26062]	-	CDS	upstream	2173	7.416	7.61356	8.25921	8.02528	9.33985	8.6091	7.32992	8.67089	7.34806	6.02103	9.31636	6.26273	7.36978	5.94958	8.86649	9.46856	5.90861	7.10693	6.75323	7.04677
Chr1:1051051-1052400	1	1051051	1052400	NA	null					Not found	0	8.24063	8.90044	7.95882	6.59902	8.11894	8.42624	8.42848	8.47735	8.95117	8.36034	9.37526	7.23102	9.25764	8.84906	7.87365	8.8914	7.76151	7.87745	7.4313	8.82664
Chr1:1057201-1058250	1	1057201	1058250	NA	null					Not found	0	7.17024	7.17915	6.11082	6.68648	6.76818	5.65736	7.31527	6.2454	6.99847	6.99901	6.40125	5.73916	7.8032	7.03922	5.739	6.1435	5.46383	6.3887	6.86015	7.93356
Chr1:1085101-1086300	1	1085101	1086300	NA	null					Not found	0	5.28888	5.61356	4.59625	2.92094	4.24793	4.80175	6.48192	4.51958	2.04428	4.97664	3.44189	3.90909	5.02298	5.36462	3.02279	3.94186	3.10126	3.43451	4.53822	7.69389
Chr1:1092451-1094550	1	1092451	1094550	NA	null					Not found	0	10.3217	10.6788	9.43994	9.5386	8.92481	9.21033	10.5175	9.55046	5.62924	10.6579	10.1968	8.54652	10.4938	10.4907	9.05779	9.75949	8.10126	10.1877	10.0163	10.7946
Chr1:1136401-1137450	1	1136401	1137450	NA	TNFRSF18-003	ENSP00000328207	tumor necrosis factor receptor superfamily, member 18 [Source:HGNC Symbol;Acc:11914]	-	CDS	upstream	1521	7.1907	6.61356	6.47071	7.69705	7.62205	5.36363	7.74496	7.38899	7.2922	6.758	7.30539	5.94862	6.78482	6.57107	6.77003	8.15909	5.99434	5.79206	7.86015	8.68517
Chr1:1252801-1254300	1	1252801	1254300	NA	CPSF3L-001	ENSP00000413493	cleavage and polyadenylation specific factor 3-like [Source:HGNC Symbol;Acc:26052]	-	CDS	overlapping	0	7.53281	6.72459	9.19261	7.07475	7.21917	8.93299	8.27799	7.65203	6.13174	6.93083	5.48142	5.98709	8.33862	7.10713	6.87365	7.94186	7.2481	3.24186	7.69665	6.56678
Chr1:1259551-1261050	1	1259551	1261050	NA	CPSF3L-001	ENSP00000413493	cleavage and polyadenylation specific factor 3-like [Source:HGNC Symbol;Acc:26052]	-	CDS	overlapping	0	9.46302	9.90634	9.55487	8.9028	9.31288	9.40943	9.36234	9.51262	9.75508	9.5158	10.1728	9.07901	9.62095	9.39889	9.36518	9.88906	9.26257	8.45132	9.15713	9.43259
Chr1:1295551-1296750	1	1295551	1296750	NA	MXRA8-002	ENSP00000436135	matrix-remodelling associated 8 [Source:HGNC Symbol;Acc:7542]	-	CDS	overlapping	0	6.89894	5.9239	9.14057	6.05845	7.90087	8.47552	6.89039	4.62649	4.74472	7.14656	8.41663	9.65504	6.19986	6.3921	7.44426	8.95979	9.46633	6.2674	7.17381	6.64078
Chr1:1309801-1312500	1	1309801	1312500	NA	AURKAIP1-002	ENSP00000342676	aurora kinase A interacting protein 1 [Source:HGNC Symbol;Acc:24114]	-	CDS	overlapping	0	10.0039	10.2081	10.0032	8.85168	9.79279	10.0819	9.93658	10.3009	10.3752	10.1111	10.4102	9.72785	10.1505	9.8712	9.8629	9.97088	9.54183	9.35337	10.1613	10.0603
Chr1:1357651-1358850	1	1357651	1358850	NA	ANKRD65-201	ENSP00000445688	ankyrin repeat domain 65 [Source:HGNC Symbol;Acc:42950]	-	CDS	downstream	1266	5.50039	6.09898	6.06191	3.40637	5.35755	5.86886	7.09288	6.51958	8.53613	6.36896	6.44189	4.1986	7.77554	6.3921	4.67487	6.7074	3.61583	5.4789	7.41736	7.50867
Chr1:1375501-1378200	1	1375501	1378200	NA	VWA1-001	ENSP00000417185	von Willebrand factor A domain containing 1 [Source:HGNC Symbol;Acc:30910]	+	CDS	upstream	334	7.30774	8.70441	6.98529	3.92094	6.44294	5.26741	6.65476	6.6005	8.64419	7.16646	8.02686	5.26273	7.95885	6.33661	7.25983	6.6423	5.2481	5.75644	7.22271	8.47872
Chr1:1406251-1407450	1	1406251	1407450	NA	ATAD3B-001	ENSP00000311766	ATPase family, AAA domain containing 3B [Source:HGNC Symbol;Acc:24007]	+	CDS	overlapping	0	9.04658	9.06246	8.19828	7.3672	8.54303	8.22961	8.401	8.71395	9.13703	8.5002	9.3935	7.69336	8.81683	8.88818	8.44425	8.34786	8.0948	7.91024	7.63775	8.58564
Chr1:1440151-1440900	1	1440151	1440900	NA	null					Not found	0	7.416	7.49326	7.43275	6.40637	7.2854	7.00934	6.76665	6.57402	7.04428	7.5002	7.58485	6.73916	7.45362	6.66418	7.07342	7.02933	6.2481	7.01947	7.55104	6.74511
Chr1:1446001-1447950	1	1446001	1447950	NA	ATAD3A-001	ENSP00000368031	ATPase family, AAA domain containing 3A [Source:HGNC Symbol;Acc:25567]	+	CDS	overlapping	0	9.76888	10.0141	9.31506	8.87048	9.50184	9.70864	9.45545	9.73203	9.94212	9.50802	10.2291	9.45341	10.0463	9.72758	9.31872	9.7206	9.26257	9.12101	9.136	9.83455
Chr1:1489651-1490850	1	1489651	1490850	NA	SSU72-001	ENSP00000291386	SSU72 RNA polymerase II CTD phosphatase homolog (S. cerevisiae) [Source:HGNC Symbol;Acc:25016]	-	CDS	overlapping	0	5.04096	5.36202	8.1523	6.59902	7.70044	5.86886	6.12683	6.02859	5.50371	5.88353	5.48142	6.06109	5.70887	5.30804	6.21544	6.88672	5.96633	2.75644	6.58884	5.64078
Chr1:1509151-1511100	1	1509151	1511100	NA	SSU72-001	ENSP00000291386	SSU72 RNA polymerase II CTD phosphatase homolog (S. cerevisiae) [Source:HGNC Symbol;Acc:25016]	-	CDS	overlapping	0	10.4268	10.658	9.9902	9.416	9.90689	10.1643	10.348	10.3985	10.6065	10.5235	10.3218	10.0013	10.3418	10.4291	10.0687	10.1993	9.81157	9.57917	10.1923	10.4661
Chr1:1562251-1565100	1	1562251	1565100	NA	MIB2-022	ENSP00000428660	mindbomb homolog 2 (Drosophila) [Source:HGNC Symbol;Acc:30577]	+	CDS	overlapping	0	5.04096	6.42913	5.01128	0.599017	3.45943	5.10987	5.70056	5.57402	5.56784	5.43607	5.99989	4.54652	6.11413	4.24914	2.8004	4.86786	2.87887	4.82683	4.63775	6.87344
Chr1:1590151-1591050	1	1590151	1591050	NA	null					Not found	0	8.88016	9.2551	8.91473	7.8564	8.62936	8.90928	8.80385	8.93808	9.36621	8.49234	9.29711	8.76153	8.69418	8.97706	8.33438	8.82451	8.54657	8.24829	9.11024	8.75348
Chr1:1596901-1597350	1	1596901	1597350	NA	SLC35E2B-003	ENSP00000367931	solute carrier family 35, member E2B [Source:HGNC Symbol;Acc:33941]	-	CDS	overlapping	0	4.04096	3.9697	3.90437	1.59902	3.16992	3.99439	4.15999	3.14106	4.50371	3.97664	3.97241	3.73916	3.82135	3.83411	0.215436	4.61994	2.29391	3.24186	3.53822	4.31885
Chr1:1617301-1618350	1	1617301	1618350	NA	null					Not found	0	5.28888	5.87659	6.57897	6.32694	7.08746	6.13735	3.70056	5.51958	3.62924	5.14656	8.7066	8.26273	5.40631	4.98611	5.50084	5.66433	7.91596	5.1894	4.63775	5.31885
Chr1:1655401-1656450	1	1655401	1656450	NA	SLC35E2-002	ENSP00000347614	solute carrier family 35, member E2 [Source:HGNC Symbol;Acc:20863]	-	CDS	upstream	403	8.72746	8.75106	8.56587	0.599017	8.36632	8.6286	8.58321	7.76165	8.65161	7.43607	9.08895	7.97757	8.98324	8.56505	8.67896	8.83426	7.8408	7.68244	8.47233	7.96271
Chr1:1677751-1678050	1	1677751	1678050	NA	null					Not found	0	6.99515	7.39597	6.63019	5.68648	6.24793	6.93299	7.22412	5.4041	8.68813	6.29857	7.50079	7.2149	6.72824	7.44554	6.48222	6.92372	7.35999	7.40029	7.6616	7.90381
Chr1:1689001-1691550	1	1689001	1691550	NA	NADK-003	ENSP00000341679	NAD kinase [Source:HGNC Symbol;Acc:29831]	-	CDS	overlapping	0	6.25041	7.29163	8.75082	8.97839	9.40301	6.76698	6.74496	6.81914	6.2142	5.88353	6.05333	6.16543	7.17184	6.54682	9.14913	7.27815	5.90861	5.29249	6.68506	6.74511
Chr1:1828201-1829250	1	1828201	1829250	NA	null					Not found	0	3.84831	5.13963	6.35367	6.32694	7.84549	3.21679	4.78803	5.81914	4.50371	2.5616	4.7314	2.32413	5.99127	4.12361	5.50084	4.61994	3.61583	5.1894	4.4313	6.84241
Chr1:1849651-1852200	1	1849651	1852200	NA	TMEM52-004	ENSP00000367865	transmembrane protein 52 [Source:HGNC Symbol;Acc:27916]	-	CDS	overlapping	0	7.12842	5.82768	5.63019	5.24287	7.75489	6.34017	5.94849	7.67712	6.2142	7.31649	8.77579	6.82663	8.9003	6.94958	6.6417	7.29236	6.63376	8.5006	6.05279	9.39031
Chr1:1890751-1892250	1	1890751	1892250	NA	C1orf222-011	ENSP00000420396	chromosome 1 open reading frame 222 [Source:HGNC Symbol;Acc:27917]	-	CDS	overlapping	0	6.28888	4.55466	4.72749	4.50591	7.05528	3.57936	5.70056	5.3427	4.62924	5.14656	4.27197	4.06109	5.25431	4.24914	2.21544	4.42729	3.61583	5.82683	4.31582	7.50867
Chr1:1934551-1935900	1	1934551	1935900	NA	null					Not found	0	6.94785	6.09898	5.75852	5.05845	5.72792	4.40943	7.74496	6.65203	5.68813	6.4029	3.07932	2.32413	7.09933	6.0565	3.38536	6.57413	1.87887	7.62433	5.58884	8.56678
Chr1:1945951-1947600	1	1945951	1947600	NA	GABRD-001	ENSP00000367848	gamma-aminobutyric acid (GABA) A receptor, delta [Source:HGNC Symbol;Acc:4084]	+	CDS	downstream	3263	6.21088	5.67014	7.28074	6.32694	7.8392	5.61888	7.77738	6.70178	2.62924	6.29857	3.97241	0.739163	6.02298	5.57107	6.36518	7.79985	3.10126	6.1894	4.63775	7.64078
Chr1:2028901-2030100	1	2028901	2030100	NA	PRKCZ-001	ENSP00000367830	protein kinase C, zeta [Source:HGNC Symbol;Acc:9412]	+	CDS	overlapping	0	4.36288	4.29163	4.29139	2.18398	4.39232	2.99439	5.09288	5.3427	3.04428	6.33419	4.27197	3.73916	3.08438	3.24914	3.02279	4.2049	1.87887	2.75644	4.63775	5.56678
Chr1:2063551-2065650	1	2063551	2065650	NA	PRKCZ-001	ENSP00000367830	protein kinase C, zeta [Source:HGNC Symbol;Acc:9412]	+	CDS	overlapping	0	8.72044	9.60995	7.65514	8.22837	9.48985	6.85237	9.92698	9.09526	4.2142	9.66314	10.1638	8.79445	9.28405	8.38528	7.3029	9.75436	8.31627	7.75644	6.25442	8.95547
Chr1:2070751-2072250	1	2070751	2072250	NA	PRKCZ-001	ENSP00000367830	protein kinase C, zeta [Source:HGNC Symbol;Acc:9412]	+	CDS	overlapping	0	5.21088	5.13963	6.47071	6.15361	7.8392	4.31632	5.91002	5.06706	4.85163	6.26204	7.77976	7.39737	4.89174	5.12361	5.739	7.63116	6.38137	5.13495	4.05279	6.36324
Chr1:2120401-2122050	1	2120401	2122050	NA	C1orf86-009	ENSP00000383709	chromosome 1 open reading frame 86 [Source:HGNC Symbol;Acc:26428]	-	CDS	overlapping	0	9.05218	9.39597	9.14644	8.57056	8.82337	9.10987	8.71737	8.56733	10.2898	9.04273	9.86068	8.92404	9.4033	8.66418	8.09195	9.51172	9.20679	3.75644	8.93053	8.71117
Chr1:2125951-2127450	1	2125951	2127450	NA	C1orf86-009	ENSP00000383709	chromosome 1 open reading frame 86 [Source:HGNC Symbol;Acc:26428]	-	CDS	overlapping	0	9.46302	9.72792	9.33321	8.4632	9.16239	9.39812	9.66346	9.25376	10.1658	9.38603	10.0269	9.00126	9.87663	9.52527	9.20412	9.82206	9.18265	9.15902	9.50894	9.8696
Chr1:2143351-2145450	1	2143351	2145450	NA	AL590822.1-201	ENSP00000443317	Uncharacterized protein [Source:UniProtKB/TrEMBL;Acc:F5H5L2]	-	CDS	overlapping	0	10.3584	9.82768	9.66336	9.00841	9.76653	10.2967	10.662	10.3699	9.44516	10.3517	10.5882	10.4309	10.639	10.3611	8.73507	10.3931	10.3356	10.4373	9.55104	10.8868
Chr1:2186551-2188200	1	2186551	2188200	NA	SKI-001	ENSP00000367797	v-ski sarcoma viral oncogene homolog (avian) [Source:HGNC Symbol;Acc:10896]	+	CDS	overlapping	0	7.99515	7.76412	8.33835	7.73857	8.74147	8.86886	9.34442	9.93288	7.2341	8.61326	8.24351	7.80525	9.34177	9.44226	5.9968	8.19736	6.3383	8.81389	6.94032	7.77828
Chr1:2425351-2426550	1	2425351	2426550	NA	PLCH2-204	ENSP00000397289	phospholipase C, eta 2 [Source:HGNC Symbol;Acc:29037]	+	CDS	overlapping	0	5.7414	5.67014	3.90437	3.59902	3.70044	4.31632	6.31527	4.51958	5.56784	6.59135	3.85693	3.32413	4.58688	6.91211	3.91588	3.42729	5.65146	5.07836	4.4313	7.50867
Chr1:2465851-2467200	1	2465851	2467200	NA	HES5-001	ENSP00000367714	hairy and enhancer of split 5 (Drosophila) [Source:HGNC Symbol;Acc:19764]	-	CDS	downstream	4248	5.43327	7.03579	4.59625	4.18398	5.04439	3.57936	5.74496	4.27857	7.98679	6.43607	4.07932	5.98709	5.30677	5.30804	4.8004	3.78986	4.2939	4.68244	4.81832	7.40631
Chr1:2509501-2510700	1	2509501	2510700	NA	null					Not found	0	3.36288	5.61356	5.69578	5.68648	5.9542	2.73136	5.55854	3.98906	4.2142	5.29857	7.81886	6.13148	4.30677	4.66418	4.12233	4.61994	6.57931	4.60443	5.31582	4.77828
Chr1:2615701-2616000	1	2615701	2616000	NA	TTC34-001	ENSP00000387700	tetratricopeptide repeat domain 34 [Source:HGNC Symbol;Acc:34297]	-	CDS	overlapping	0	2.62592	2.9697	3.66336	0.599017	0	2.73136	2.28553	2.81914	4.36621	2.5616	1.85693	1.73916	1.49942	0.664182	1.21544	2.2049	0.293905	0.434509	1.73086	3.31885
Chr1:3209401-3210600	1	3209401	3210600	NA	PRDM16-007	ENSP00000426975	PR domain containing 16 [Source:HGNC Symbol;Acc:14000]	+	CDS	overlapping	0	3.62592	3.29163	3.90437	0.599017	2.80735	4.65736	4.94849	3.4041	4.36621	4.5616	2.5939	3.32413	3.30677	3.24914	3.67487	1.61994	0.293905	4.43451	0.730862	5.96271
Chr1:3229051-3230700	1	3229051	3230700	NA	PRDM16-007	ENSP00000426975	PR domain containing 16 [Source:HGNC Symbol;Acc:14000]	+	CDS	overlapping	0	3.36288	4.9697	8.49395	8.76392	7.82018	9.89325	9.30419	9.99156	6.36621	9.0694	6.91582	5.49405	7.51065	6.21877	5.83015	9.17068	8.06869	7.07836	7.48575	8.21367
Chr1:3235351-3237900	1	3235351	3237900	NA	PRDM16-007	ENSP00000426975	PR domain containing 16 [Source:HGNC Symbol;Acc:14000]	+	CDS	overlapping	0	4.7414	4.55466	6.01128	4.05845	4.16993	8.01676	7.61943	8.33484	6.65899	6.64906	3.27197	4.1986	5.3574	5.12361	1.8004	5.57413	1.87887	5.1894	5.77526	7.01929
Chr1:3285751-3287100	1	3285751	3287100	NA	PRDM16-007	ENSP00000426975	PR domain containing 16 [Source:HGNC Symbol;Acc:14000]	+	CDS	overlapping	0	3.84831	1.9697	5.41338	2.18398	3.32193	9.40661	6.22412	7.47735	4.85163	6.97664	5.79553	3.73916	3.49942	4.98611	1.8004	4.7074	5.65146	3.01947	4.81832	7.01929
Chr1:3459151-3460650	1	3459151	3460650	NA	MEGF6-007	ENSP00000348982	multiple EGF-like-domains 6 [Source:HGNC Symbol;Acc:3232]	-	CDS	overlapping	0	4.50039	4.13963	6.59625	2.92094	6.83289	8.10987	5.22412	7.26208	5.95117	5.67708	4.5939	9.77808	4.89174	5.12361	4.38536	7.89606	9.34103	4.3414	5.12318	6.40631
Chr1:3520501-3522450	1	3520501	3522450	NA	MEGF6-007	ENSP00000348982	multiple EGF-like-domains 6 [Source:HGNC Symbol;Acc:3232]	-	CDS	overlapping	0	5.12842	4.77706	4.29139	2.92094	2.58496	2.99439	5.401	5.72603	7.19402	5.14656	3.97241	3.90909	4.19986	4.98611	2.53736	4.42729	3.29391	4.24186	3.53822	6.56678
Chr1:3540601-3541950	1	3540601	3541950	NA	TPRG1L-001	ENSP00000367595	tumor protein p63 regulated 1-like [Source:HGNC Symbol;Acc:27007]	+	CDS	overlapping	0	7.32636	8.45352	7.84055	6.40637	7.13955	8.50219	8.21626	8.9066	8.09956	7.71811	9.53875	7.68168	8.4881	7.9951	7.43461	8.34104	8.61132	7.3887	8.51222	8.18921
Chr1:3640651-3641550	1	3640651	3641550	NA	TP73-001	ENSP00000367545	tumor protein p73 [Source:HGNC Symbol;Acc:12003]	+	CDS	overlapping	0	5.12842	4.13963	4.52586	2.92094	3.80735	5.45382	4.87049	4.27857	7.2922	4.88353	3.5939	2.32413	5.58688	3.47154	2.53736	4.61994	2.87887	4.01947	4.4313	6.48878
Chr1:3712051-3713850	1	3712051	3713850	NA	LRRC47-001	ENSP00000367498	leucine rich repeat containing 47 [Source:HGNC Symbol;Acc:29207]	-	CDS	overlapping	0	9.60701	10.0782	9.25921	8.52383	9.17493	9.51009	9.57093	9.77042	9.88033	9.98787	9.87188	8.76707	9.93405	9.77271	9.12533	9.63396	8.64263	8.82683	9.40682	9.89628
Chr1:3773251-3775200	1	3773251	3775200	NA	DFFB-001	ENSP00000367454	DNA fragmentation factor, 40kDa, beta polypeptide (caspase-activated DNase) [Source:HGNC Symbol;Acc:2773]	+	CDS	overlapping	0	8.82886	9.87659	8.71568	7.09087	7.98299	8.80175	9.01798	8.97901	9.57566	9.43607	10.0664	7.8372	9.54654	9.40902	8.36518	9.29589	8.80566	8.60943	9.27002	9.64528
Chr1:3815401-3818400	1	3815401	3818400	NA	C1orf174-001	ENSP00000355306	chromosome 1 open reading frame 174 [Source:HGNC Symbol;Acc:27915]	-	CDS	overlapping	0	10.4138	10.8493	10.2207	9.29598	10.0265	10.2549	10.5476	10.5317	11.1541	10.5913	10.718	9.98709	10.6184	10.5666	10.1899	10.5972	9.84657	10.0138	10.2127	10.7047
Chr1:5611351-5612400	1	5611351	5612400	NA	null					Not found	0	3.62592	4.55466	2.52586	2.18398	3.16992	3.73136	5.82985	3.98906	5.50371	4.29857	0.271968	2.32413	3.66934	3.24914	2.53736	3.2049	0.293905	4.13495	0.730862	4.64078
Chr1:5671201-5672850	1	5671201	5672850	NA	null					Not found	0	4.04096	3.9697	3.37385	0.599017	3.16992	2.73136	4.401	5.21145	6.2142	4.14656	3.97241	3.90909	3.66934	4.66418	3.53736	3.42729	1.87887	2.75644	4.53822	4.31885
Chr1:5805601-5806500	1	5805601	5806500	NA	null					Not found	0	3.62592	4.42913	3.78889	0.599017	2.58496	4.40943	5.22412	3.14106	7.86446	4.14656	3.44189	0.739163	4.89174	2.98611	6.12233	3.42729	0.293905	4.01947	3.05279	6.36324
Chr1:5916151-5917200	1	5916151	5917200	NA	null					Not found	0	3.36288	3.77706	2.20393	2.59902	3.58496	3.57936	4.401	3.62649	5.50371	4.88353	3.44189	2.32413	3.82135	4.75164	2.21544	2.2049	1.87887	4.24186	4.19029	4.64078
Chr1:6043051-6044250	1	6043051	6044250	NA	NPHP4-001	ENSP00000367398	nephronophthisis 4 [Source:HGNC Symbol;Acc:19104]	-	CDS	overlapping	0	4.84831	3.55466	6.11082	4.18398	3	6.55918	5.94849	3.14106	5.2922	4.88353	2.27197	4.06109	4.95885	4.47154	4.38536	2.94186	4.2939	3.43451	3.90079	8.08703
Chr1:6084451-6087300	1	6084451	6087300	NA	null					Not found	0	5.99515	5.36202	6.90437	0.599017	7.2854	6.86886	5.70056	5.57402	6.7722	6.0641	9.97587	7.42566	5.45362	5.0565	8.20979	7.93282	8.71176	5.60443	6.22271	8.01929
Chr1:6203101-6204300	1	6203101	6204300	NA	CHD5-007	ENSP00000367245	chromodomain helicase DNA binding protein 5 [Source:HGNC Symbol;Acc:16816]	-	CDS	overlapping	0	4.50039	4.29163	4.37385	0.599017	4.52356	4.10987	4.15999	2.4041	5.36621	3.5616	3.97241	2.32413	3.82135	3.66418	3.38536	4.2049	0.293905	3.24186	3.05279	6.01929
Chr1:6217051-6218700	1	6217051	6218700	NA	CHD5-001	ENSP00000262450	chromodomain helicase DNA binding protein 5 [Source:HGNC Symbol;Acc:16816]	-	CDS	overlapping	0	5.12842	4.55466	6.81864	8.45077	9.25739	6.91722	5.401	7.29487	6.17356	5.36896	7.41152	5.26273	4.74735	3.98611	7.71528	8.47792	5.38137	3.24186	4.31582	5.84241
Chr1:6264451-6267750	1	6264451	6267750	NA	RNF207-001	ENSP00000367173	ring finger protein 207 [Source:HGNC Symbol;Acc:32947]	+	CDS	overlapping	0	6.50039	7.15953	8.41825	7.80847	8.9629	5.80175	6.28553	7.21145	8.26345	6.0641	6.02686	6.80525	6.56551	5.91211	9.00334	7.44012	7.02183	6.62433	6.51222	7.50867
Chr1:6279301-6282000	1	6279301	6282000	NA	RNF207-001	ENSP00000367173	ring finger protein 207 [Source:HGNC Symbol;Acc:32947]	+	CDS	overlapping	0	5.28888	6.09898	5.66336	2.59902	4.39232	5.69483	5.34442	3.14106	6.40183	4.78399	6.05333	4.82663	5.54381	5.79346	4.3029	4.42729	4.46383	6.24186	5.25442	6.60425
Chr1:6403051-6404250	1	6403051	6404250	NA	ACOT7-001	ENSP00000367086	acyl-CoA thioesterase 7 [Source:HGNC Symbol;Acc:24157]	-	CDS	overlapping	0	5.12842	5.49326	6.13467	3.92094	5.52356	5.73136	5.74496	4.62649	7.2731	6.22457	6.07932	3.06109	5.85697	5.0565	5.21544	5.7074	2.87887	6.82683	5.31582	6.96271
Chr1:6413551-6415050	1	6413551	6415050	NA	ACOT7-001	ENSP00000367086	acyl-CoA thioesterase 7 [Source:HGNC Symbol;Acc:24157]	-	CDS	overlapping	0	6.71338	7.56961	9.32027	8.05023	7.89482	7.98686	7.0756	5.98906	7.08867	7.71811	5.22616	4.06109	6.45362	5.79346	4.53736	8.18979	4.54183	6.60443	5.53822	9.05356
Chr1:6445201-6447300	1	6445201	6447300	NA	ACOT7-001	ENSP00000367086	acyl-CoA thioesterase 7 [Source:HGNC Symbol;Acc:24157]	-	CDS	overlapping	0	10.347	9.73457	10.1997	9.52679	9.8857	9.82728	10.0493	10.2786	9.86126	9.90442	10.1983	6.94862	10.1877	10.0946	10.1388	10.2674	6.40243	9.74512	9.51876	10.0123
Chr1:6451951-6454650	1	6451951	6454650	NA	ACOT7-006	ENSP00000354615	acyl-CoA thioesterase 7 [Source:HGNC Symbol;Acc:24157]	-	CDS	overlapping	0	10.5004	10.6976	9.86926	9.37051	9.77643	9.59182	10.5191	10.1478	11.0968	10.8174	10.5849	9.16543	10.5615	10.6443	9.96531	10.4241	8.81747	10.3902	9.72238	10.7112
Chr1:6506551-6508800	1	6506551	6508800	NA	ESPN-001	ENSP00000367059	espin [Source:HGNC Symbol;Acc:13281]	+	CDS	overlapping	0	7.54875	8.99207	7.45186	4.29946	5.64386	6.10987	8.05812	6.43385	9.7756	7.70456	8.46673	2.73916	6.89174	6.68655	4.739	4.78986	3.75334	7.07836	6.37472	8.20149
Chr1:6613951-6615450	1	6613951	6615450	NA	NOL9-001	ENSP00000366934	nucleolar protein 9 [Source:HGNC Symbol;Acc:26265]	-	CDS	overlapping	0	9.5408	9.6736	9.14644	7.82784	8.84549	9.1509	9.25898	9.39278	9.41932	9.56535	9.59164	8.73916	9.92568	9.54988	9.0066	9.53582	8.66459	9.63663	9.12747	10.1581
Chr1:6639001-6641100	1	6639001	6641100	NA	TAS1R1-001	ENSP00000331867	taste receptor, type 1, member 1 [Source:HGNC Symbol;Acc:14448]	+	CDS	overlapping	0	9.65198	9.66667	9.58979	8.87514	9.26913	9.62375	9.59841	9.5161	9.75164	9.47648	10.0151	8.78901	9.84149	9.24914	9.47753	9.71269	8.71597	9.74966	9.24656	9.98773
Chr1:6672451-6674550	1	6672451	6674550	NA	PHF13-001	ENSP00000366876	PHD finger protein 13 [Source:HGNC Symbol;Acc:22983]	+	CDS	overlapping	0	10.1932	10.3184	9.9061	9.13818	9.61287	10.0801	10.1226	9.9066	10.404	10.0101	10.4618	9.35755	10.1894	10.2771	9.95522	10.3964	9.74718	9.91832	9.85757	9.98063
Chr1:6684301-6686550	1	6684301	6686550	NA	THAP3-001	ENSP00000054650	THAP domain containing, apoptosis associated protein 3 [Source:HGNC Symbol;Acc:20855]	+	CDS	overlapping	0	9.42033	9.89451	9.59194	8.75889	9.21675	9.57434	9.56784	9.99905	9.82235	9.32979	10.0269	8.57205	9.69909	9.23783	9.37025	9.81469	9.27975	9.6169	9.51876	9.63173
Chr1:6761101-6762750	1	6761101	6762750	NA	DNAJC11-001	ENSP00000366800	DnaJ (Hsp40) homolog, subfamily C, member 11 [Source:HGNC Symbol;Acc:25570]	-	CDS	overlapping	0	9.3941	9.86148	9.13171	8.32012	8.92481	8.89325	9.2436	9.38519	9.51188	9.53123	9.63172	8.95833	9.48241	9.58006	8.94336	9.23096	8.58853	9.8733	8.88568	9.76593
Chr1:6787351-6788100	1	6787351	6788100	NA	null					Not found	0	3.62592	4.13963	4.78889	1.59902	3.32193	3.21679	3.28553	0.819136	3.04428	1.97664	3.5939	3.54652	4.58688	3.83411	0.215436	2.94186	2.61583	3.75644	4.19029	4.48878
Chr1:6843901-6845850	1	6843901	6845850	NA	CAMTA1-001	ENSP00000306522	calmodulin binding transcription activator 1 [Source:HGNC Symbol;Acc:18806]	+	CDS	overlapping	0	10.1856	10.0465	9.85856	8.61582	9.74651	9.73136	9.97436	9.76165	10.2142	10.2127	10.3123	9.3938	10.1178	10.3542	9.80789	9.95533	9.40504	10.0891	9.87297	10.2614
Chr1:6919651-6921000	1	6919651	6921000	NA	CAMTA1-001	ENSP00000306522	calmodulin binding transcription activator 1 [Source:HGNC Symbol;Acc:18806]	+	CDS	overlapping	0	4.62592	4.55466	7.63019	5.80847	8.23362	6.81882	5.74496	7.47735	4.04428	6.33419	5.94439	9.10111	5.66934	5.24914	7.58176	7.84875	9.30793	5.13495	4.73086	5.01929
Chr1:7051051-7052100	1	7051051	7052100	NA	CAMTA1-001	ENSP00000306522	calmodulin binding transcription activator 1 [Source:HGNC Symbol;Acc:18806]	+	CDS	overlapping	0	4.7414	4.13963	5.84778	6.50591	8.2854	5.49689	4.28553	3.4041	6.85163	5.93083	3.7314	5.64605	4.19986	4.36462	4.67487	6.34786	5.38137	4.68244	5.05279	4.48878
Chr1:7058101-7059000	1	7058101	7059000	NA	CAMTA1-001	ENSP00000306522	calmodulin binding transcription activator 1 [Source:HGNC Symbol;Acc:18806]	+	CDS	overlapping	0	4.50039	3.9697	3.52586	2.92094	2.80735	2.73136	3.02249	1.81914	4.85163	3.78399	1.85693	0.739163	3.30677	2.24914	2.53736	3.2049	2.87887	4.43451	2.31582	5.31885
Chr1:7177351-7178550	1	7177351	7178550	NA	CAMTA1-001	ENSP00000306522	calmodulin binding transcription activator 1 [Source:HGNC Symbol;Acc:18806]	+	CDS	overlapping	0	6.97169	5.13963	7.56148	6.52975	8.26679	6.24232	7.82985	6.88522	8.65161	7.36896	5.27197	7.54652	7.51065	6.30804	3.02279	8.11978	7.66894	7.1894	8.41736	6.31885
Chr1:7278001-7279050	1	7278001	7279050	NA	CAMTA1-001	ENSP00000306522	calmodulin binding transcription activator 1 [Source:HGNC Symbol;Acc:18806]	+	CDS	overlapping	0	3.36288	0.969701	4.45186	4.18398	4.70044	3.21679	5.22412	3.81914	8.25373	4.14656	2.5939	3.54652	5.74735	4.12361	1.8004	3.78986	5.93776	5.92636	3.31582	5.31885
Chr1:7324801-7328250	1	7324801	7328250	NA	CAMTA1-001	ENSP00000306522	calmodulin binding transcription activator 1 [Source:HGNC Symbol;Acc:18806]	+	CDS	overlapping	0	8.67758	6.17915	9.62599	9.61024	10.4969	7.96402	9.70899	9.69872	6.87717	8.15655	9.02686	9.19037	9.71374	7.24914	4.3029	10.0916	10.1781	8.27371	9.2505	8.06032
Chr1:7358551-7362000	1	7358551	7362000	NA	CAMTA1-001	ENSP00000306522	calmodulin binding transcription activator 1 [Source:HGNC Symbol;Acc:18806]	+	CDS	overlapping	0	8.57234	4.9697	10.1123	9.69705	10.5999	9.55664	9.75041	10.22	8.55207	9.33419	6.81113	11.0978	10.0655	7.88335	6.34472	10.7974	11.1689	9.29249	9.53176	9.16434
Chr1:7461451-7463100	1	7461451	7463100	NA	CAMTA1-001	ENSP00000306522	calmodulin binding transcription activator 1 [Source:HGNC Symbol;Acc:18806]	+	CDS	overlapping	0	6.12842	4.13963	8.05568	7.70754	7.97728	6.02414	6.58321	6.74987	6.32968	6.88353	2.5939	7.18211	6.45362	4.47154	7.1343	7.78986	8.67328	5.92636	6.22271	6.44813
Chr1:7530151-7532400	1	7530151	7532400	NA	CAMTA1-001	ENSP00000306522	calmodulin binding transcription activator 1 [Source:HGNC Symbol;Acc:18806]	+	CDS	overlapping	0	7.23078	5.29163	9.92844	8.98272	10.021	8.64783	9.40792	10.0139	7.62924	9.36896	10.1653	9.86587	9.82809	6.49707	9.45623	10.4779	10.4024	7.79206	8.87041	9.35777
Chr1:7608901-7611900	1	7608901	7611900	NA	CAMTA1-001	ENSP00000306522	calmodulin binding transcription activator 1 [Source:HGNC Symbol;Acc:18806]	+	CDS	overlapping	0	7.01824	5.21763	8.71172	9.4908	10.0042	8.11679	8.75041	8.82476	7.13174	7.38603	8.5939	8.08789	9.59745	6.47154	9.0703	9.82206	8.34919	10.1556	8.63775	8.6764
Chr1:7706851-7708050	1	7706851	7708050	NA	CAMTA1-001	ENSP00000306522	calmodulin binding transcription activator 1 [Source:HGNC Symbol;Acc:18806]	+	CDS	overlapping	0	4.7414	4.77706	5.72749	4.18398	5.08746	4.86886	6.80909	4.98906	8.24395	5.83462	2.5939	5.06109	7.83927	5.18774	3.67487	6.17453	7.2481	6.36525	5.05279	7.17683
Chr1:7812601-7813650	1	7812601	7813650	NA	CAMTA1-001	ENSP00000306522	calmodulin binding transcription activator 1 [Source:HGNC Symbol;Acc:18806]	+	CDS	overlapping	0	6.94785	5.13963	6.24832	5.29946	5.35755	5.69483	7.20836	3.98906	7.36621	7.08516	1.85693	4.4396	7.36978	6.27889	2.8004	5.82939	4.87887	6.29249	7.19029	6.64078
Chr1:7870051-7871250	1	7870051	7871250	NA	PER3-001	ENSP00000366755	period homolog 3 (Drosophila) [Source:HGNC Symbol;Acc:8847]	+	CDS	overlapping	0	4.94785	1.9697	5.48933	5.50591	5.72792	4.80175	4.60745	4.14106	5.04428	3.29857	3.7314	3.73916	4.82135	2.66418	6.02279	4.52683	4.38137	4.43451	5.48575	5.1262
Chr1:7947901-7949250	1	7947901	7949250	NA	null					Not found	0	3.84831	4.67014	6.39375	6.43191	6.96578	6.61888	4.87049	2.4041	4.2142	4.43607	5.76382	2.73916	4.66934	4.24914	5.88786	5.52683	1.87887	5.60443	3.90079	5.22574
Chr1:7980301-7981200	1	7980301	7981200	NA	TNFRSF9-001	ENSP00000366729	tumor necrosis factor receptor superfamily, member 9 [Source:HGNC Symbol;Acc:11924]	-	CDS	overlapping	0	3.36288	3.55466	5.20393	5.84694	7.88874	4.21679	5.60745	5.27857	2.62924	2.97664	3.5939	3.06109	4.58688	3.47154	8.00985	6.52683	3.61583	5.95807	4.81832	5.90381
Chr1:7986601-7987200	1	7986601	7987200	NA	TNFRSF9-001	ENSP00000366729	tumor necrosis factor receptor superfamily, member 9 [Source:HGNC Symbol;Acc:11924]	-	CDS	overlapping	0	3.36288	3.29163	3.37385	0.599017	4.85798	4.31632	3.28553	0.819136	2.04428	1.97664	1.85693	2.32413	2.82135	3.47154	1.21544	3.42729	1.29391	2.43451	2.73086	2.90381
Chr1:8013601-8015100	1	8013601	8015100	NA	null					Not found	0	8.27936	4.29163	9.19261	8.02528	7.56224	8.89727	8.69492	8.71395	4.50371	7.70456	8.8494	8.36852	8.42423	6.81393	4.91588	7.5388	7.88636	5.24186	8.64375	7.94821
Chr1:8020501-8022750	1	8020501	8022750	NA	PARK7-002	ENSP00000340278	parkinson protein 7 [Source:HGNC Symbol;Acc:16369]	+	CDS	downstream	96	10.3054	10.2176	9.64894	8.9697	9.64386	10.0515	10.0669	9.74395	10.4705	10.2198	9.87188	9.29758	10.3019	10.0608	9.70729	9.75179	9.43601	10.0006	9.58261	10.0018
Chr1:8035051-8036100	1	8035051	8036100	NA	PARK7-002	ENSP00000340278	parkinson protein 7 [Source:HGNC Symbol;Acc:16369]	+	CDS	overlapping	0	4.04096	4.77706	5.20393	4.68648	4.39232	5.26741	4.70056	4.27857	5.43659	5.14656	3.27197	3.73916	4.19986	4.66418	4.21544	4.07937	2.29391	4.89394	5.37472	4.64078
Chr1:8053951-8054850	1	8053951	8054850	NA	null					Not found	0	4.50039	5.36202	8.30196	8.39992	8.90388	5.36363	5.74496	4.98906	4.2142	5.14656	7.37	6.26273	5.40631	3.98611	8.50084	8.38812	6.2481	7.5006	5.12318	5.77828
Chr1:8098951-8101800	1	8098951	8101800	NA	null					Not found	0	7.17024	7.39597	8.19828	8.78884	9.40514	8.05329	7.52074	7.6895	5.2142	6.5616	6.20271	8.36122	8.3196	5.83411	9.37783	7.33418	9.23054	8.58933	7.48575	7.6587
Chr1:8115601-8117700	1	8115601	8117700	NA	null					Not found	0	5.12842	5.67014	5.69578	6.97406	6.71425	5.80175	5.60745	5.57402	5.90226	4.78399	5.7314	6.82663	5.99127	3.66418	6.07342	6.42729	6.98041	6.66333	5.86015	5.48878
Chr1:8192401-8195100	1	8192401	8195100	NA	null					Not found	0	7.53281	6.69762	9.28074	9.85168	9.74483	9.80604	7.22412	7.78492	5.13174	6.18609	7.2832	9.07901	10.1541	5.24914	7.35499	9.59148	9.67761	9.60694	6.63775	7.87344
Chr1:8197051-8199300	1	8197051	8199300	NA	null					Not found	0	8.50039	8.64213	8.63019	9.75889	9.65464	9.49954	7.64308	8.18546	4.95117	7.88353	7.40125	8.6758	9.5547	6.33661	8.20412	9.8391	9.30233	8.71991	8.17381	8.70255
Chr1:8291701-8293350	1	8291701	8293350	NA	null					Not found	0	4.84831	5.77706	5.69578	4.29946	5.85798	4.80175	5.74496	4.4041	4.85163	3.97664	4.97241	4.32413	4.58688	4.57107	7.59048	5.07937	2.87887	6.31715	5.37472	6.48878
Chr1:8318551-8320500	1	8318551	8320500	NA	null					Not found	0	5.50039	6.58441	5.63019	8.16887	7.39232	8.79745	5.15999	7.02859	4.85163	4.14656	3.44189	7.52052	6.05401	4.91211	6.83015	6.23465	7.82529	5.82683	6.51222	6.22574
Chr1:8403001-8404950	1	8403001	8404950	NA	SLC45A1-202	ENSP00000366699	solute carrier family 45, member 1 [Source:HGNC Symbol;Acc:17939]	+	CDS	overlapping	0	5.99515	6.21763	8.48933	8.30638	9.12412	6.86886	6.60745	7.738	3.3662	4.67708	6.87188	7.72785	7.44193	3.98611	9.04199	8.35465	7.74512	8.58426	6.95968	8.29613
Chr1:8433301-8434350	1	8433301	8434350	NA	RERE-001	ENSP00000338629	arginine-glutamic acid dipeptide (RE) repeats [Source:HGNC Symbol;Acc:9965]	-	CDS	overlapping	0	8.69201	7.46155	8.01128	8.19147	7.07682	9.02414	7.84011	8.63292	7.68813	7.67708	7.69823	7.8581	8.93405	7.893	6.2378	8.16683	8.18265	8.44574	8.81833	8.6764
Chr1:8483701-8485350	1	8483701	8485350	NA	RERE-001	ENSP00000338629	arginine-glutamic acid dipeptide (RE) repeats [Source:HGNC Symbol;Acc:9965]	-	CDS	overlapping	0	8.91132	9.28711	9.01128	9.06662	9.42836	9.29513	9.24746	8.95869	9.13174	9.03192	9.72729	8.79986	9.45362	9.12771	9.69522	9.49338	9.1796	9.23864	8.86014	9.65424
Chr1:8530051-8531100	1	8530051	8531100	NA	RERE-001	ENSP00000338629	arginine-glutamic acid dipeptide (RE) repeats [Source:HGNC Symbol;Acc:9965]	-	CDS	overlapping	0	5.28888	5.29163	4.20393	0.599017	3.80735	3.40943	4.28553	0.819136	4.2142	3.78399	3.85693	0.739163	4.95885	4.12361	3.8004	2.2049	1.87887	5.3414	3.73086	6.31885
Chr1:8553451-8554950	1	8553451	8554950	NA	RERE-001	ENSP00000338629	arginine-glutamic acid dipeptide (RE) repeats [Source:HGNC Symbol;Acc:9965]	-	CDS	overlapping	0	4.21088	5.21763	4.90437	2.59902	4.58496	5.49689	5.15999	3.62649	5.2922	3.78399	4.27197	5.06109	5.08438	4.83411	3.67487	3.2049	6.2481	4.52197	4.63775	5.1262
Chr1:8585251-8586750	1	8585251	8586750	NA	RERE-001	ENSP00000338629	arginine-glutamic acid dipeptide (RE) repeats [Source:HGNC Symbol;Acc:9965]	-	CDS	overlapping	0	8.52477	7.75106	8.31767	8.28552	7.90087	8.39812	7.91973	7.50564	7.81246	8.5691	8.44189	8.19037	8.69909	8.148	8.1163	7.97749	8.64705	8.22892	8.7024	8.01929
Chr1:8908651-8909700	1	8908651	8909700	NA	null					Not found	0	7.7414	8.15953	7.76617	6.15361	5.75489	6.91722	7.60745	5.57402	8.02156	8.04273	7.44189	5.49405	7.99127	7.59492	4.91588	6.0462	5.57931	6.60443	6.58884	7.85801
Chr1:8949151-8950800	1	8949151	8950800	NA	null					Not found	0	8.38968	9.84622	7.89741	7.83742	7.33985	8.85651	9.76665	8.95356	6.59887	9.14656	9.18486	8.68168	9.2775	9.48755	6.51922	6.80976	8.79375	8.64883	8.95968	9.71117
Chr1:8959501-8960850	1	8959501	8960850	NA	null					Not found	0	5.36288	4.87659	6.06191	6.02528	7.56986	8.55409	6.25515	6.94842	4.95117	4.14656	5.88668	5.69336	4.58688	5.75164	7.03562	7.52683	5.04879	4.89394	4.19029	5.56678
Chr1:8977951-8978850	1	8977951	8978850	NA	null					Not found	0	6.17024	9.19852	6.39375	4.84694	5.49185	5.31632	7.55854	6.02859	5.56784	6.85928	4.27197	5.1986	7.03858	7.40565	3.67487	4.94186	5.10126	6.10693	7.12318	7.1262
Chr1:9001501-9002550	1	9001501	9002550	NA	CA6-007	ENSP00000447108	carbonic anhydrase VI [Source:HGNC Symbol;Acc:1380]	+	CDS	downstream	3396	7.84831	9.58073	8.87988	7.61024	8.2854	7.40943	9.37652	7.83036	5.2142	8.39449	8.29434	6.29375	8.99127	8.81393	7.51922	7.29236	6.57931	7.20269	9.05729	7.90381
Chr1:9045601-9047100	1	9045601	9047100	NA	null					Not found	0	7.82232	9.56961	8.65926	6.9028	8.75822	7.72231	9.23972	7.61355	6.43659	8.21504	5.48142	7.59714	8.15763	8.29354	6.7546	8.01225	7.16427	7.52197	8.54464	7.48878
Chr1:9064651-9065850	1	9064651	9065850	NA	SLC2A7-001	ENSP00000383698	solute carrier family 2 (facilitated glucose transporter), member 7 [Source:HGNC Symbol;Acc:13445]	-	CDS	overlapping	0	6.25041	7.36202	5.72749	2.92094	4.85798	5.80175	6.34442	5.06706	3.62924	5.67708	5.69823	5.26273	6.25431	5.18774	3.91588	4.42729	5.2008	5.79206	6.25442	5.56678
Chr1:9140401-9141450	1	9140401	9141450	NA	null					Not found	0	5.21088	4.9697	6.31245	6.52975	6.87037	4.31632	5.02249	3.14106	4.04428	0.976638	2.5939	5.06109	3.95885	3.98611	5.50084	5.1435	6.59769	4.43451	3.53822	5.40631
Chr1:9170551-9171600	1	9170551	9171600	NA	GPR157-002	ENSP00000366628	G protein-coupled receptor 157 [Source:HGNC Symbol;Acc:23687]	-	CDS	overlapping	0	5.12842	6.72459	5.63019	2.92094	3.16992	5.26741	5.87049	4.98906	5.2142	5.22457	4.5199	4.06109	5.74735	5.52216	4.53736	5.26379	4.87887	5.56379	5.12318	6.87344
Chr1:9187951-9190350	1	9187951	9190350	NA	GPR157-002	ENSP00000366628	G protein-coupled receptor 157 [Source:HGNC Symbol;Acc:23687]	-	CDS	overlapping	0	8.33558	9.25047	8.81864	6.78884	8.91588	8.92513	8.30789	9.19851	5.95117	4.67708	9.70033	8.39021	8.30677	7.40565	9.22666	8.77981	8.59769	9.43451	5.90079	8.8187
Chr1:9204901-9206250	1	9204901	9206250	NA	null					Not found	0	5.36288	5.49326	6.56148	3.92094	6.26679	6.51795	5.401	7.14106	4.62924	4.5616	3.7314	5.64605	5.85697	4.75164	5.02279	4.78986	3.61583	5.95807	5.48575	7.44813
Chr1:9222451-9225600	1	9222451	9225600	NA	null					Not found	0	8.77567	8.0141	10.4672	8.13818	10.0566	10.3505	9.7986	9.82476	9.98386	9.26666	5.31636	9.18625	9.69418	8.70858	9.61632	10.2656	9.72853	9.97367	9.82889	9.09364
Chr1:9326701-9328200	1	9326701	9328200	NA	H6PD-001	ENSP00000366620	hexose-6-phosphate dehydrogenase (glucose 1-dehydrogenase) [Source:HGNC Symbol;Acc:4795]	+	CDS	upstream	1773	6.12842	6.42913	6.69578	4.18398	6	6.99439	6.25515	6.67712	5.56784	5.62049	6.55737	6.02457	6.40631	4.83411	6.57299	5.74922	6.63376	5.92636	5.37472	5.96271
Chr1:9335101-9336450	1	9335101	9336450	NA	null					Not found	0	6.68481	5.42913	8.96215	7.71796	8.49586	7.05329	6.37299	4.27857	5.56784	5.5002	6.95847	8.91409	6.28078	4.75164	7.80789	7.09567	8.93415	6.79206	8.33819	6.93356
Chr1:9339301-9341550	1	9339301	9341550	NA	null					Not found	0	5.12842	5.55466	8.4471	6.32694	7.72792	8.05329	6.34442	6.94842	4.85163	5.73153	7.20271	9.30522	6.02298	5.12361	7.45384	7.68603	9.2038	6.58426	6.15713	7.17683
Chr1:9359701-9361350	1	9359701	9361350	NA	null					Not found	0	4.7414	4.77706	6.71172	4.68648	8.71425	8.60419	5.78803	7.6895	5.13174	4.78399	6.24925	7.81598	4.89174	5.47154	7.2378	5.42729	7.43346	6.41179	5.25442	5.96271
Chr1:9362701-9364050	1	9362701	9364050	NA	null					Not found	0	5.89894	5.13963	7.76617	8.29946	8.58496	8.37521	5.78803	6.57402	4.04428	4.5616	8.12372	8.82663	5.6287	4.57107	7.15795	7.23465	8.49358	6.24186	5.58884	6.31885
Chr1:9448201-9449700	1	9448201	9449700	NA	null					Not found	0	7.94785	7.78988	6.20393	4.05845	6.55459	6.85237	7.34442	6.02859	4.04428	7.87146	4.5199	4.82663	7.08438	7.80373	3.8004	6.23465	7.35999	7.74739	8.51876	7.76179
Chr1:9460201-9461400	1	9460201	9461400	NA	null					Not found	0	5.7414	5.67014	5.72749	5.457	6.74147	9.1743	6.34442	4.51958	4.95117	5.73153	5.22616	8.90909	6.56551	5.52216	3.8004	8.24929	9.10126	5.38871	5.63775	7.4686
Chr1:9472651-9474300	1	9472651	9474300	NA	null					Not found	0	4.84831	4.77706	8.43275	7.51788	8.72792	9.12711	5.87049	4.72603	5.2142	5.22457	8.22616	9.60953	5.14328	4.66418	5.53736	8.42084	9.19477	7.03442	5.86015	6.74511
Chr1:9488251-9489750	1	9488251	9489750	NA	null					Not found	0	8.67758	8.9297	7.99834	7.29946	7.49985	8.614	8.45545	8.29487	9.22419	8.55407	8.7314	7.80525	8.97515	8.60082	7.69925	7.75949	7.61583	9.24508	8.03464	9.03995
Chr1:9515401-9516600	1	9515401	9516600	NA	null					Not found	0	3.62592	4.9697	4.90437	4.29946	4.24793	5.36363	4.02249	4.62649	4.04428	4.97664	6.24925	4.90909	4.40631	4.12361	4.12233	4.32038	5.04879	4.60443	3.73086	4.77828
Chr1:9554701-9556050	1	9554701	9556050	NA	null					Not found	0	6.68481	6.99207	7.01128	4.99133	6.24793	6.81882	6.89039	6.17669	7.83869	6.70456	7.26065	5.32413	7.91727	5.79346	6.62483	6.55067	5.2939	7.81821	6.37472	8.24959
Chr1:9686701-9687900	1	9686701	9687900	NA	null					Not found	0	6.21088	7.44543	6.24832	5.24287	6.32193	5.05329	5.02249	5.51958	6.32968	4.29857	7.52936	5.73916	7.43016	6.0565	6.34472	7.24929	5.2939	8.32933	5.63775	8.20149
Chr1:9731101-9732150	1	9731101	9732150	NA	null					Not found	0	3.36288	2.55466	5.33321	3.18398	6.61471	3.99439	5.15999	1.81914	4.95117	3.29857	3.5939	6.13148	4.30677	3.98611	3.8004	5.01225	4.2008	4.60443	3.31582	5.1262
Chr1:9760051-9761100	1	9760051	9761100	NA	null					Not found	0	4.84831	4.67014	6.43275	5.05845	7.94251	5.40943	4.78803	5.21145	4.2142	3.29857	4.7314	9.09672	4.82135	4.57107	4.67487	8.27099	7.87133	5.29249	3.53822	6.64078
Chr1:9778651-9780000	1	9778651	9780000	NA	PIK3CD-001	ENSP00000366563	phosphoinositide-3-kinase, catalytic, delta polypeptide [Source:HGNC Symbol;Acc:8977]	+	CDS	overlapping	0	5.89894	5.55466	8.35875	8.03365	8.81698	7.03879	5.401	8.09526	5.43659	4.29857	9.16375	7.1986	6.56551	4.75164	8.02279	9.24199	7.8017	7.44574	5.86015	6.77828
Chr1:9784651-9785550	1	9784651	9785550	NA	PIK3CD-001	ENSP00000366563	phosphoinositide-3-kinase, catalytic, delta polypeptide [Source:HGNC Symbol;Acc:8977]	+	CDS	overlapping	0	4.21088	4.13963	4.84778	4.29946	4.70044	4.65736	3.87049	4.14106	4.50371	3.78399	4.79553	4.06109	4.82135	3.66418	4.85929	5.32038	4.99434	5.07836	3.53822	4.64078
Chr1:9896101-9897300	1	9896101	9897300	NA	null					Not found	0	7.12842	8.42091	6.90437	5.84694	5.75489	7.48625	6.96735	5.14106	10.2659	8.16646	5.99989	6.09672	9.1178	8.81393	4.85929	6.55067	6.68622	7.88572	6.28545	8.6587
Chr1:9927001-9928200	1	9927001	9928200	NA	CTNNBIP1-001	ENSP00000366474	catenin, beta interacting protein 1 [Source:HGNC Symbol;Acc:16913]	-	CDS	overlapping	0	5.28888	5.61356	6.27002	4.68648	4.16993	5.73136	5.91002	4.4041	9.0777	6.18609	5.48142	5.38302	6.54381	6.47154	5.21544	5.7074	5.2481	5.86077	5.12318	6.99128
Chr1:9937651-9939000	1	9937651	9939000	NA	null					Not found	0	4.94785	5.67014	6.03682	5.40637	4.45943	4.65736	6.25515	4.14106	5.85163	4.43607	4.44189	3.32413	5.78482	4.24914	4.60775	4.2049	3.46383	5.38871	4.81832	6.5283
Chr1:9952651-9954750	1	9952651	9954750	NA	null					Not found	0	7.82232	6.99207	10.0758	9.62968	9.68124	9.61888	9.48847	7.10454	6.85163	8.16646	8.98277	8.86845	9.76621	7.36462	9.81906	9.63116	8.85996	8.66813	8.32332	8.84241
Chr1:9958501-9959700	1	9958501	9959700	NA	null					Not found	0	4.36288	4.55466	6.59625	5.7283	5.83289	5.21679	5.70056	2.4041	5.36621	4.29857	4.97241	6.38302	5.30677	2.24914	5.53736	6.47792	4.46383	5.4789	4.53822	5.96271
Chr1:9969001-9971550	1	9969001	9971550	NA	null					Not found	0	9.66301	9.83079	9.87635	9.5503	9.33985	9.49424	9.99748	9.35441	10.1632	9.62049	10.2846	8.71644	10.1123	9.50339	9.66665	10.0058	8.91229	9.66813	9.29692	9.94456
Chr1:10002301-10004550	1	10002301	10004550	NA	LZIC-202	ENSP00000437432	leucine zipper and CTNNBIP1 domain containing [Source:HGNC Symbol;Acc:17497]	-	CDS	overlapping	0	10.1204	10.1961	9.74115	9.3672	9.65642	9.614	9.81431	9.52994	9.79247	9.90442	10.1331	9.32413	10.1523	9.62997	9.76811	9.49952	9.33008	9.90007	9.88568	9.90381
Chr1:10010251-10011150	1	10010251	10011150	NA	null					Not found	0	7.14948	7.50886	7.45186	5.29946	6.80735	6.73136	6.31527	6.49156	7.73078	6.88353	6.79553	6.02457	7.83927	6.66418	8.16963	6.01225	5.57931	7.71063	8.95968	6.96271
Chr1:10018501-10019700	1	10018501	10019700	NA	null					Not found	0	3.84831	3.9697	4.90437	5.64341	3.90689	3.99439	4.15999	0.819136	4.36621	2.5616	4.17886	4.82663	4.40631	3.98611	3.8004	2.61994	3.29391	4.3414	3.31582	5.71117
Chr1:10056601-10057500	1	10056601	10057500	NA	RBP7-001	ENSP00000294435	retinol binding protein 7, cellular [Source:HGNC Symbol;Acc:30316]	+	CDS	overlapping	0	5.56452	4.67014	4.01128	2.18398	5.58496	5.69483	5.94849	5.98906	4.95117	4.14656	4.7314	2.73916	4.95885	3.66418	4.21544	5.57413	1.87887	4.3414	5.12318	6.36324
Chr1:10092001-10094100	1	10092001	10094100	NA	UBE4B-002	ENSP00000253251	ubiquitination factor E4B [Source:HGNC Symbol;Acc:12500]	+	CDS	overlapping	0	9.75863	10.1396	9.61967	8.9999	9.07682	9.55918	9.86798	9.41905	10.3274	9.684	9.96371	9.56253	9.98122	9.83911	9.34729	9.61146	9.2276	9.77213	9.81035	9.53802
Chr1:10134151-10135050	1	10134151	10135050	NA	UBE4B-002	ENSP00000253251	ubiquitination factor E4B [Source:HGNC Symbol;Acc:12500]	+	CDS	overlapping	0	6.36288	5.9239	8.03682	6.78884	7.50779	6.86886	7.10995	7.4041	5.2922	6.18609	7.65567	6.64605	7.5547	5.41907	8.07342	6.61994	6.22464	6.95807	7.52528	7.8107
Chr1:10167751-10169250	1	10167751	10169250	NA	UBE4B-002	ENSP00000253251	ubiquitination factor E4B [Source:HGNC Symbol;Acc:12500]	+	CDS	overlapping	0	8.18051	8.05716	8.23183	7.94774	8.14466	5.93299	9.1763	5.21145	5.62924	6.53123	5.48142	7.48063	8.35117	8.35068	7.79287	6.86786	7.00815	9.25788	7.25442	7.71117
Chr1:10290301-10291650	1	10290301	10291650	NA	KIF1B-002	ENSP00000263934	kinesin family member 1B [Source:HGNC Symbol;Acc:16636]	+	CDS	downstream	737	4.36288	5.13963	5.78889	5.40637	6.18982	5.21679	4.70056	4.9066	4.04428	4.43607	3.7314	4.54652	4.89174	4.75164	3.91588	4.86786	4.46383	4.68244	3.53822	5.77828
Chr1:10458151-10460100	1	10458151	10460100	NA	PGD-001	ENSP00000270776	phosphogluconate dehydrogenase [Source:HGNC Symbol;Acc:8891]	+	CDS	overlapping	0	10.2794	10.7657	9.35113	8.9119	9.50581	9.57434	9.96969	10.4827	10.0666	9.9453	10.0402	8.54006	10.2526	10.2033	9.62058	10.0399	8.99087	9.98718	10.1275	10.2227
Chr1:10489801-10491600	1	10489801	10491600	NA	APITD1-001	ENSP00000308583	apoptosis-inducing, TAF9-like domain 1 [Source:HGNC Symbol;Acc:23163]	+	CDS	overlapping	0	9.97465	10.1913	9.46837	8.5763	9.02791	9.54642	9.69209	9.48447	10.556	9.41958	9.98965	9.04294	10.2392	9.94495	9.09502	9.66433	8.61583	10.1052	9.09281	10.1454
Chr1:10518901-10519800	1	10518901	10519800	NA	DFFA-001	ENSP00000366237	DNA fragmentation factor, 45kDa, alpha polypeptide [Source:HGNC Symbol;Acc:2772]	-	CDS	upstream	1747	4.36288	2.9697	6.74309	6.95657	6.91886	5.31632	4.50792	5.3427	4.50371	0.976638	4.91582	4.82663	5.25431	4.36462	6.34472	6.17453	5.90861	5.82683	3.31582	4.31885
Chr1:10531351-10533300	1	10531351	10533300	NA	DFFA-001	ENSP00000366237	DNA fragmentation factor, 45kDa, alpha polypeptide [Source:HGNC Symbol;Acc:2772]	-	CDS	overlapping	0	8.89271	9.22237	8.61756	7.70754	8.33092	8.41505	8.91002	8.86898	8.87082	8.36896	9.21448	7.58465	9.15047	8.58899	8.58176	8.67522	8.27118	9.15219	8.53176	8.74512
Chr1:10569901-10571700	1	10569901	10571700	NA	PEX14-001	ENSP00000349016	peroxisomal biogenesis factor 14 [Source:HGNC Symbol;Acc:8856]	+	CDS	overlapping	0	8.26012	5.82768	8.97871	9.87514	9.89785	8.43734	7.67784	9.63292	8.56784	7.18609	6.76382	8.88891	8.16475	6.49707	10.2267	9.17453	8.7033	9.3444	10.0752	7.96271
Chr1:10587901-10589400	1	10587901	10589400	NA	PEX14-001	ENSP00000349016	peroxisomal biogenesis factor 14 [Source:HGNC Symbol;Acc:8856]	+	CDS	overlapping	0	9.11242	6.64213	8.50771	9.34385	9.51175	8.55918	8.92938	10.0455	7.87717	8.29857	4.07932	5.59714	9.69418	9.28989	9.68711	8.84875	6.99434	9.48979	9.60431	8.80267
Chr1:10635301-10636350	1	10635301	10636350	NA	PEX14-001	ENSP00000349016	peroxisomal biogenesis factor 14 [Source:HGNC Symbol;Acc:8856]	+	CDS	overlapping	0	2.62592	2.55466	4.59625	5.12258	6.65821	3.40943	3.50792	4.62649	4.36621	3.29857	1.85693	7.2149	2.82135	2.98611	5.50084	0.619936	6.89382	3.43451	3.53822	2.90381
Chr1:10790701-10792350	1	10790701	10792350	NA	null					Not found	0	4.7414	5.42913	4.20393	5.457	5.90689	3.57936	4.87049	6.92766	6.08867	3.78399	3.85693	2.73916	4.30677	3.83411	4.60775	2.94186	3.61583	6.43451	4.97879	6.71117
Chr1:10837501-10840350	1	10837501	10840350	NA	null					Not found	0	5.99515	5.61356	8.52586	9.5029	10.102	5.16432	6.50792	8.32693	8.7167	4.97664	3.7314	4.06109	5.3574	5.12361	10.4764	5.01225	3.46383	8.28	8.25442	7.64078
Chr1:10863751-10865100	1	10863751	10865100	NA	null					Not found	0	4.50039	4.9697	5.01128	6.97406	7.30378	5.05329	5.55854	5.51958	5.90226	3.29857	3.27197	2.32413	4.89174	4.98611	7.21544	4.52683	3.10126	6.7013	4.73086	6.5283
Chr1:11020651-11021700	1	11020651	11021700	NA	C1orf127-001	ENSP00000387816	chromosome 1 open reading frame 127 [Source:HGNC Symbol;Acc:26730]	-	CDS	overlapping	0	6.12842	6.49326	5.84778	5.29946	4.16993	4.21679	5.45545	4.51958	6.85163	5.62049	6.24925	3.73916	6.38206	5.66418	4.97032	5.74922	2.87887	7.93435	6.15713	7.99128
Chr1:11071801-11074050	1	11071801	11074050	NA	TARDBP-001	ENSP00000240185	TAR DNA binding protein [Source:HGNC Symbol;Acc:11571]	+	CDS	overlapping	0	10.0689	10.2984	10.0447	10.002	9.49586	9.82939	9.98597	9.90925	10.4579	10.0641	10.005	9.58151	10.1415	10.0457	9.739	9.86549	9.31627	10.0802	9.97879	10.4037
Chr1:11097301-11098350	1	11097301	11098350	NA	MASP2-001	ENSP00000383690	mannan-binding lectin serine peptidase 2 [Source:HGNC Symbol;Acc:6902]	-	CDS	overlapping	0	5.12842	5.72459	4.20393	3.59902	2.32193	4.21679	5.09288	2.4041	6.2142	3.97664	3.44189	4.4396	5.66934	4.98611	1.21544	3.42729	3.61583	6.71991	5.31582	6.27305
Chr1:11158801-11160750	1	11158801	11160750	NA	EXOSC10-001	ENSP00000366135	exosome component 10 [Source:HGNC Symbol;Acc:9138]	-	CDS	overlapping	0	9.72395	10.2849	9.53932	9.14205	8.96578	9.33721	9.62538	9.38519	10.171	9.925	9.8494	9.27055	9.81457	9.893	9.07652	9.40784	9.08181	9.8733	9.59505	10.1002
Chr1:11322001-11323500	1	11322001	11323500	NA	MTOR-201	ENSP00000440730	mechanistic target of rapamycin (serine/threonine kinase) [Source:HGNC Symbol;Acc:3942]	-	CDS	downstream	2535	8.78242	9.69421	8.75082	8.71796	8.62936	8.91326	9.11419	9.14106	9.77899	9.32979	9.42679	8.59091	9.37594	9.23404	8.62058	9.11579	8.6293	9.16243	8.98825	9.17683
Chr1:11332351-11334150	1	11332351	11334150	NA	UBIAD1-001	ENSP00000366006	UbiA prenyltransferase domain containing 1 [Source:HGNC Symbol;Acc:30791]	+	CDS	overlapping	0	9.50039	9.86452	9.0273	9.06254	8.98584	8.74928	9.32261	9.46299	9.72376	9.4029	9.61626	8.98234	9.59482	9.55293	8.89492	9.32038	8.48866	9.59942	9.01626	9.99128
Chr1:11380051-11381100	1	11380051	11381100	NA	null					Not found	0	3.36288	4.29163	3.90437	0.599017	2.58496	4.73136	5.09288	4.27857	5.90226	4.29857	3.44189	2.32413	5.45362	3.47154	3.38536	0.619936	2.61583	5.29249	3.90079	6.44813
Chr1:11443951-11445000	1	11443951	11445000	NA	null					Not found	0	4.84831	4.13963	3.01128	2.59902	3.80735	3.57936	4.87049	4.81914	9.1684	3.78399	3.85693	2.73916	5.3574	5.36462	3.38536	3.61994	0.293905	5.24186	2.73086	5.56678
Chr1:11538301-11539800	1	11538301	11539800	NA	null					Not found	0	8.34474	8.19852	7.47071	5.55321	7.35755	6.59926	8.96735	8.2454	10.2341	9.21026	7.87188	6.96798	9.60008	9.57107	6.36518	8.18979	6.07526	9.2093	8.42435	9.5283
Chr1:11610601-11611350	1	11610601	11611350	NA	null					Not found	0	1.04096	2.55466	1.78889	0.599017	2.80735	2.73136	4.15999	0.819136	4.04428	2.5616	0.271968	0.739163	3.66934	2.24914	0.215436	1.61994	1.29391	0.434509	0.730862	3.64078
Chr1:11740201-11742300	1	11740201	11742300	NA	MAD2L2-001	ENSP00000235310	MAD2 mitotic arrest deficient-like 2 (yeast) [Source:HGNC Symbol;Acc:6764]	-	CDS	overlapping	0	9.99806	9.53576	10.1406	10.0909	9.66711	10.0801	10.1121	9.94584	11.0996	10.4805	10.1392	9.78356	10.3003	9.9565	9.6375	10.2656	9.53231	10.0981	9.95245	10.3329
Chr1:11752351-11754000	1	11752351	11754000	NA	null					Not found	0	7.68481	5.29163	8.54822	6.09087	7.30378	9.62375	8.78271	8.58732	9.86764	8.69088	5.62952	5.64605	8.77088	7.12361	6.2378	8.76968	5.2939	8.66333	9.33078	8.77828
Chr1:11795551-11797800	1	11795551	11797800	NA	AGTRAP-003	ENSP00000365824	angiotensin II receptor-associated protein [Source:HGNC Symbol;Acc:13539]	+	CDS	overlapping	0	9.54478	9.72124	9.18692	8.84694	8.96867	9.57182	9.43866	10.0407	9.0832	8.71811	9.89585	8.65803	9.9465	9.25664	8.90194	9.38149	9.01158	8.91832	9.33819	10.0088
Chr1:11844301-11845950	1	11844301	11845950	NA	C1orf167-201	ENSP00000414909	chromosome 1 open reading frame 167 [Source:HGNC Symbol;Acc:25262]	+	CDS	overlapping	0	5.7414	6.49326	6.43275	5.50591	5.67243	6.24232	6.96735	6.86353	5.95117	5.73153	6.48142	7.8581	6.89174	7.10713	5.85929	6.26379	8.53231	5.75644	7.63775	8.78646
Chr1:11881051-11882400	1	11881051	11882400	NA	CLCN6-001	ENSP00000234488	chloride channel 6 [Source:HGNC Symbol;Acc:2024]	+	CDS	overlapping	0	4.36288	4.42913	4.45186	6.95657	7.69349	5.69483	5.22412	5.81914	5.79916	3.29857	5.27197	6.4396	5.02298	5.75164	5.94336	4.7074	5.61583	4.13495	3.73086	4.48878
Chr1:11898301-11899500	1	11898301	11899500	NA	CLCN6-001	ENSP00000234488	chloride channel 6 [Source:HGNC Symbol;Acc:2024]	+	CDS	overlapping	0	3.62592	5.29163	4.84778	3.76894	3.58496	3.73136	5.87049	4.51958	7.55207	4.97664	4.27197	3.32413	5.30677	4.98611	3.38536	4.42729	4.38137	2.75644	4.19029	6.48878
Chr1:11922601-11923650	1	11922601	11923650	NA	NPPB-001	ENSP00000365651	natriuretic peptide B [Source:HGNC Symbol;Acc:7940]	-	CDS	downstream	3711	3.84831	3.77706	4.45186	2.18398	4.16993	2.73136	5.02249	3.98906	6.08867	3.97664	2.5939	3.32413	4.74735	3.98611	2.8004	2.94186	1.87887	3.75644	3.31582	5.40631
Chr1:11953651-11954550	1	11953651	11954550	NA	null					Not found	0	3.36288	2.55466	3.37385	0.599017	3	2.73136	3.87049	2.81914	6.87717	3.5616	2.85693	2.32413	3.95885	3.47154	2.21544	0.619936	1.87887	2.43451	3.53822	5.96271
Chr1:11961001-11962200	1	11961001	11962200	NA	null					Not found	0	3.36288	4.55466	2.20393	0.599017	3.90689	3.21679	4.70056	3.98906	6.43659	3.78399	3.5939	3.06109	4.30677	0.664182	3.38536	3.94186	0.293905	4.3414	2.73086	5.22574
Chr1:11967001-11970600	1	11967001	11970600	NA	null					Not found	0	10.1416	10.8354	10.4207	10.5691	10.3365	10.3461	9.92215	10.8248	11.3169	10.1162	10.0368	9.81598	10.4609	10.0799	10.4249	9.28171	9.91961	9.88159	10.2106	10.6272
Chr1:11998501-12000900	1	11998501	12000900	NA	PLOD1-005	ENSP00000414443	procollagen-lysine, 2-oxoglutarate 5-dioxygenase 1 [Source:HGNC Symbol;Acc:9081]	+	CDS	overlapping	0	7.53281	9.28711	7.65514	8.89822	9.57175	7.32829	8.30789	6.67712	10.558	8.54649	9.12372	9.32788	8.77554	6.27889	8.95353	7.5388	9.28826	9.37702	8.89577	10.1262
Chr1:12039451-12041400	1	12039451	12041400	NA	PLOD1-001	ENSP00000196061	procollagen-lysine, 2-oxoglutarate 5-dioxygenase 1 [Source:HGNC Symbol;Acc:9081]	+	CDS	upstream	4586	9.69201	10.3073	9.68169	9.77893	9.7211	9.73586	9.72847	10.303	10.8338	9.70796	10.1893	9.20677	10.2543	9.58305	9.64589	9.84394	9.25391	9.6169	9.49241	9.9591
Chr1:12061351-12063000	1	12061351	12063000	NA	MFN2-001	ENSP00000235329	mitofusin 2 [Source:HGNC Symbol;Acc:16877]	+	CDS	overlapping	0	5.43327	5.29163	7.3638	4.76894	6.30378	6.51795	5.78803	8.738	7.79916	5.22457	6.53875	5.64605	6.52179	4.83411	3.38536	5.32038	5.42319	5.24186	5.53822	6.44813
Chr1:12078751-12080550	1	12078751	12080550	NA	MIIP-001	ENSP00000235332	migration and invasion inhibitory protein [Source:HGNC Symbol;Acc:25715]	+	CDS	downstream	1234	9.03531	9.45754	8.4847	8.26435	8.25739	8.29817	8.7986	9.20284	9.32968	8.91328	9.61848	7.32413	9.29058	8.85894	8.49621	8.96867	7.72017	8.38871	8.53176	9.11327
Chr1:12111301-12112950	1	12111301	12112950	NA	null					Not found	0	5.68481	4.67014	8.18121	6.59902	7.27612	7.6091	6.19242	6.51958	8.60652	6.29857	7.15461	5.86845	7.58688	4.83411	6.8004	8.12773	6.99434	6.86077	6.6135	7.48878
Chr1:12141151-12142650	1	12141151	12142650	NA	TNFRSF8-001	ENSP00000263932	tumor necrosis factor receptor superfamily, member 8 [Source:HGNC Symbol;Acc:11923]	+	CDS	overlapping	0	5.99515	4.13963	5.06191	4.05845	5	4.86886	5.22412	4.4041	6.08867	4.43607	4.5199	4.64605	5.54381	4.57107	3.38536	5.32038	3.46383	5.68244	5.12318	5.84241
Chr1:12212851-12214050	1	12212851	12214050	NA	null					Not found	0	4.04096	5.55466	6.69578	5.24287	6.24793	7.39812	5.65476	5.14106	5.04428	4.29857	5.07932	8.23901	4.95885	3.66418	6.07342	7.3614	8.17655	7.3414	6.31582	7.44813
Chr1:12221101-12223200	1	12221101	12223200	NA	TNFRSF1B-001	ENSP00000365435	tumor necrosis factor receptor superfamily, member 1B [Source:HGNC Symbol;Acc:11917]	+	CDS	downstream	3949	7.43327	6.72459	9.10177	8.23564	8.66889	8.54898	7.27042	7.00896	6.2922	6.29857	8.53875	8.32413	7.92568	5.41907	8.0858	9.28527	8.35999	9.25788	8.46557	9.20759
Chr1:12237751-12240000	1	12237751	12240000	NA	TNFRSF1B-001	ENSP00000365435	tumor necrosis factor receptor superfamily, member 1B [Source:HGNC Symbol;Acc:11917]	+	CDS	overlapping	0	6.89894	8.30955	8.85856	8.75383	8.36632	7.51795	7.88047	8.15899	6.56784	7.95392	7.94439	6.76153	7.17184	5.83411	7.8004	9.09567	6.87887	9.69425	9.30072	9.10021
Chr1:12492901-12495150	1	12492901	12495150	NA	VPS13D-001	ENSP00000350854	vacuolar protein sorting 13 homolog D (S. cerevisiae) [Source:HGNC Symbol;Acc:23595]	+	CDS	overlapping	0	6.65567	4.29163	7.58763	5.92095	5.04439	6.74928	5.50792	4.81914	5.56784	4.88353	6.53875	5.32413	8.19291	4.91211	4.46336	7.46543	6.90861	7.64396	6.28545	7.10021
Chr1:12561151-12562500	1	12561151	12562500	NA	VPS13D-001	ENSP00000350854	vacuolar protein sorting 13 homolog D (S. cerevisiae) [Source:HGNC Symbol;Acc:23595]	+	CDS	overlapping	0	5.50039	3.29163	4.72749	2.18398	3	7.17761	4.02249	3.14106	4.95117	4.29857	3.97241	4.54652	4.95885	4.36462	3.38536	4.32038	3.87887	4.89394	3.53822	5.90381
Chr1:12588001-12589800	1	12588001	12589800	NA	null					Not found	0	5.04096	5.05716	5.93185	3.59902	4.75489	5.21679	5.15999	5.21145	5.95117	4.14656	4.85693	3.06109	5.49942	4.83411	4.21544	4.7074	5.2008	5.92636	3.73086	6.40631
Chr1:12608701-12611250	1	12608701	12611250	NA	null					Not found	0	6.97169	6.17915	8.86214	6.38038	7.48382	8.16432	6.19242	7.57402	8.7167	5.22457	9.86629	8.64003	7.61836	5.94958	7.22666	7.98626	7.35999	7.29249	6.37472	7.6587
Chr1:12647851-12648900	1	12647851	12648900	NA	DHRS3-001	ENSP00000365397	dehydrogenase/reductase (SDR family) member 3 [Source:HGNC Symbol;Acc:17693]	-	CDS	overlapping	0	3.84831	3.77706	3.90437	0.599017	3.32193	2.99439	4.28553	2.4041	5.13174	3.78399	3.27197	4.06109	4.40631	3.47154	2.21544	2.2049	0.293905	4.13495	3.05279	4.31885
Chr1:12718651-12719700	1	12718651	12719700	NA	AADACL4-001	ENSP00000365395	arylacetamide deacetylase-like 4 [Source:HGNC Symbol;Acc:32038]	+	CDS	overlapping	0	5.04096	4.13963	4.66336	2.92094	3.90689	5.05329	4.60745	3.62649	3.85163	4.29857	3.97241	2.73916	5.25431	5.57107	3.67487	3.2049	4.68622	6.24186	4.53822	4.90381
Chr1:12911101-12912450	1	12911101	12912450	NA	HNRNPCL1-001	ENSP00000365370	heterogeneous nuclear ribonucleoprotein C-like 1 [Source:HGNC Symbol;Acc:29295]	-	CDS	downstream	2959	3.84831	3.77706	4.52586	2.59902	6.85798	3.21679	4.28553	8.73203	5.13174	2.97664	5.02686	8.1142	3.82135	4.36462	4.8004	3.61994	8.46883	3.89394	3.53822	5.56678
Chr1:13833301-13834350	1	13833301	13834350	NA	LRRC38-001	ENSP00000365253	leucine rich repeat containing 38 [Source:HGNC Symbol;Acc:27005]	-	CDS	overlapping	0	2.62592	3.55466	3.37385	0.599017	3.70044	0.40943	3.87049	1.81914	4.04428	3.5616	2.5939	3.90909	3.30677	2.98611	0.215436	1.61994	0.293905	3.01947	2.31582	4.1262
Chr1:13870351-13870950	1	13870351	13870950	NA	null					Not found	0	3.04096	4.9697	5.11082	1.59902	4.24793	5.45382	4.70056	4.4041	5.95117	5.62049	1.85693	0.739163	5.30677	2.24914	3.91588	5.01225	0.293905	4.43451	4.63775	6.1262
Chr1:13991851-13992900	1	13991851	13992900	NA	null					Not found	0	3.36288	4.67014	5.37385	0.599017	2.80735	4.21679	4.15999	4.72603	6.97501	4.88353	3.27197	1.73916	4.66934	3.83411	3.8004	4.32038	2.87887	3.75644	5.31582	5.56678
Chr1:14085151-14086500	1	14085151	14086500	NA	PRDM2-002	ENSP00000365216	PR domain containing 2, with ZNF domain [Source:HGNC Symbol;Acc:9347]	+	CDS	overlapping	0	3.36288	4.13963	4.20393	2.92094	3.80735	4.80175	4.50792	2.81914	5.56784	3.5616	0.271968	3.54652	4.95885	4.12361	3.67487	0.619936	5.2008	4.43451	2.73086	5.48878
Chr1:14093101-14094300	1	14093101	14094300	NA	PRDM2-002	ENSP00000365216	PR domain containing 2, with ZNF domain [Source:HGNC Symbol;Acc:9347]	+	CDS	overlapping	0	3.62592	4.29163	5.15812	3.76894	6.75489	7.30425	5.02249	6.57402	5.2142	3.78399	2.85693	6.13148	3.82135	4.66418	7.06093	6.07937	6.81747	3.24186	3.90079	4.90381
Chr1:14155051-14156550	1	14155051	14156550	NA	null					Not found	0	4.84831	4.13963	4.37385	2.59902	3.45943	3.86886	4.15999	3.4041	5.13174	3.78399	4.07932	2.32413	5.66934	4.75164	0.215436	4.32038	3.46383	2.43451	4.53822	5.01929
Chr1:14247751-14249700	1	14247751	14249700	NA	C1orf196-001	ENSP00000412721	chromosome 1 open reading frame 196 [Source:HGNC Symbol;Acc:32336]	+	CDS	overlapping	0	3.36288	4.87659	4.66336	2.18398	3.90689	4.57936	5.34442	5.27857	4.50371	4.88353	1.85693	3.90909	5.74735	4.98611	3.21544	4.07937	1.87887	5.24186	4.63775	7.22574
Chr1:14366101-14367150	1	14366101	14367150	NA	C1orf196-001	ENSP00000412721	chromosome 1 open reading frame 196 [Source:HGNC Symbol;Acc:32336]	+	CDS	overlapping	0	4.36288	3.29163	3.90437	1.59902	2.80735	2.73136	4.94849	3.14106	5.36621	3.97664	4.97241	1.73916	3.49942	3.83411	2.21544	0.619936	1.87887	2.43451	3.53822	5.31885
Chr1:14381701-14383050	1	14381701	14383050	NA	C1orf196-001	ENSP00000412721	chromosome 1 open reading frame 196 [Source:HGNC Symbol;Acc:32336]	+	CDS	overlapping	0	4.62592	4.55466	4.29139	0.599017	3.45943	4.93299	4.50792	5.3427	5.36621	3.29857	3.97241	3.73916	5.40631	3.98611	3.02279	5.90534	2.61583	3.75644	4.81832	6.36324
Chr1:14672251-14673450	1	14672251	14673450	NA	null					Not found	0	5.56452	4.42913	5.56148	0.599017	4	3.86886	6.09288	4.62649	4.04428	4.29857	1.85693	5.1986	7.4881	4.66418	0.215436	4.86786	3.61583	4.24186	6.01626	6.36324
Chr1:15068251-15069750	1	15068251	15069750	NA	KAZN-001	ENSP00000365198	kazrin, periplakin interacting protein [Source:HGNC Symbol;Acc:29173]	+	CDS	overlapping	0	5.99515	3.55466	9.4036	9.60745	9.24317	8.96402	6.50792	9.03345	7.81246	6.95392	8.60736	8.38302	8.82585	6.36462	9.71528	9.36813	8.48373	5.75644	8.8498	7.22574
Chr1:15322201-15323700	1	15322201	15323700	NA	KAZN-001	ENSP00000365198	kazrin, periplakin interacting protein [Source:HGNC Symbol;Acc:29173]	+	CDS	overlapping	0	6.87385	3.77706	8.9216	8.73857	9.00562	8.32232	5.34442	7.2454	6.04428	6.78399	7.34878	9.65205	7.19986	4.75164	9.56195	8.98626	9.88074	6.7013	7.97879	6.87344
Chr1:15426601-15427500	1	15426601	15427500	NA	KAZN-001	ENSP00000365198	kazrin, periplakin interacting protein [Source:HGNC Symbol;Acc:29173]	+	CDS	overlapping	0	4.62592	3.29163	3.01128	2.18398	2	1.40943	4.28553	3.14106	5.85163	3.97664	2.85693	2.32413	4.66934	4.66418	3.21544	2.2049	1.87887	3.60443	4.19029	5.77828
Chr1:15454651-15455850	1	15454651	15455850	NA	null					Not found	0	5.43327	5.13963	5.48933	3.76894	4.52356	4.40943	4.78803	4.27857	6.17356	5.22457	4.5199	3.54652	6.33231	4.47154	2.8004	4.7074	3.75334	4.01947	4.81832	5.90381
Chr1:15526201-15529200	1	15526201	15529200	NA	null					Not found	0	7.68481	7.34474	7.86214	6.64341	6.49185	7.16432	6.78803	6.17669	6.36621	6.59135	7.43184	7.06109	8.43606	7.58305	4.53736	5.94186	7.31627	6.64396	8.07071	9.23174
Chr1:15562351-15564000	1	15562351	15564000	NA	null					Not found	0	5.28888	6.01409	4.59625	2.92094	6.49185	4.80175	5.50792	3.4041	5.2142	4.14656	9.54576	3.06109	5.74735	4.12361	3.38536	4.07937	4.68622	5.56379	5.73086	7.04677
Chr1:15585601-15589050	1	15585601	15589050	NA	FHAD1-022	ENSP00000402241	forkhead-associated (FHA) phosphopeptide binding domain 1 [Source:HGNC Symbol;Acc:29408]	+	CDS	overlapping	0	7.68481	7.01409	9.67357	8.2925	9.49785	5.45382	7.23972	7.85256	7.64419	6.29857	9.43939	7.1142	7.30677	6.87364	9.41265	7.51475	7.03537	6.13495	8.97879	8.34122
Chr1:15598351-15599850	1	15598351	15599850	NA	FHAD1-022	ENSP00000402241	forkhead-associated (FHA) phosphopeptide binding domain 1 [Source:HGNC Symbol;Acc:29408]	+	CDS	overlapping	0	6.68481	7.39597	5.78889	4.29946	4.75489	3.86886	6.55854	4.51958	8.0555	7.62049	6.31636	5.78356	7.79404	6.33661	4.67487	5.1435	4.68622	6.77436	6.97879	8.04677
Chr1:15630751-15631950	1	15630751	15631950	NA	FHAD1-026	ENSP00000365166	forkhead-associated (FHA) phosphopeptide binding domain 1 [Source:HGNC Symbol;Acc:29408]	+	CDS	overlapping	0	4.84831	4.87659	4.78889	2.18398	4.08746	4.86886	4.28553	4.9066	5.99847	2.97664	3.5939	5.06109	4.82135	4.12361	3.21544	3.78986	5.10126	4.24186	3.73086	5.31885
Chr1:15649051-15650850	1	15649051	15650850	NA	FHAD1-026	ENSP00000365166	forkhead-associated (FHA) phosphopeptide binding domain 1 [Source:HGNC Symbol;Acc:29408]	+	CDS	overlapping	0	6.50039	5.21763	6.39375	7.48166	8.64386	5.53871	6.25515	3.98906	7.92692	5.83462	5.22616	6.96798	6.85697	4.47154	6.46336	6.23465	6.2008	6.5006	6.37472	7.07374
Chr1:15663451-15665550	1	15663451	15665550	NA	FHAD1-026	ENSP00000365166	forkhead-associated (FHA) phosphopeptide binding domain 1 [Source:HGNC Symbol;Acc:29408]	+	CDS	overlapping	0	8.71338	4.67014	9.74309	9.89822	9.21917	8.85651	8.1763	8.73203	6.17356	6.97664	7.81113	9.02918	9.13241	5.75164	9.1343	9.95085	8.74923	9.02697	8.7024	8.01929
Chr1:15752551-15754050	1	15752551	15754050	NA	EFHD2-001	ENSP00000365147	EF-hand domain family, member D2 [Source:HGNC Symbol;Acc:28670]	+	CDS	overlapping	0	5.68481	6.01409	8.38384	9.33373	8.76487	6.61888	6.76665	6.57402	7.2922	5.78399	6.95847	5.69336	5.92568	6.12361	7.79287	9.09972	6.1268	7.22892	6.56375	7.01929
Chr1:15786001-15786900	1	15786001	15786900	NA	CELA2A-001	ENSP00000352639	chymotrypsin-like elastase family, member 2A [Source:HGNC Symbol;Acc:24609]	+	CDS	overlapping	0	8.01824	4.55466	6.41338	5.92095	6.79442	5.65736	6.91002	6.43385	9.70249	7.60599	5.62952	3.73916	7.69909	5.18774	4.21544	6.37482	3.87887	4.52197	6.88061	7.4686
Chr1:15942901-15945450	1	15942901	15945450	NA	DDI2-001	ENSP00000417748	DNA-damage inducible 1 homolog 2 (S. cerevisiae) [Source:HGNC Symbol;Acc:24578]	+	CDS	overlapping	0	10.0067	10.2129	9.70974	9.82302	9.65105	9.74482	9.85285	9.66463	10.0968	9.99066	10.068	9.75039	9.94443	9.57107	9.67282	9.81715	9.87887	9.37702	9.81567	9.63173
Chr1:16067551-16068600	1	16067551	16068600	NA	TMEM82-001	ENSP00000364938	transmembrane protein 82 [Source:HGNC Symbol;Acc:32350]	+	CDS	downstream	455	4.7414	5.9239	5.93185	5.29946	5.75489	4.40943	4.94849	3.4041	6.74472	5.36896	5.17886	3.54652	4.66934	3.98611	7.19272	4.78986	3.99434	3.01947	5.31582	6.60425
Chr1:16082401-16083750	1	16082401	16083750	NA	null					Not found	0	7.28888	9.68395	5.24832	8.39992	7.93664	6.63825	8.1763	6.27857	6.47054	8.02103	7.57575	3.54652	7.45362	6.44554	5.53736	6.42729	4.81747	6.8439	6.97879	8.77828
Chr1:16125151-16128300	1	16125151	16128300	NA	null					Not found	0	6.53281	6.36202	7.90437	9.08686	9.92778	7.64784	6.74496	9.50564	5.43659	5.62049	8.26065	10.3722	6.94236	5.79346	7.87365	9.8391	9.87887	6.43451	6.05279	7.87344
Chr1:16141651-16142700	1	16141651	16142700	NA	null					Not found	0	5.28888	5.42913	4.66336	4.05845	4.08746	4.86886	4.70056	3.62649	5.2922	4.97664	2.5939	2.73916	4.58688	4.12361	3.21544	3.61994	3.87887	4.43451	4.31582	5.77828
Chr1:16211851-16213800	1	16211851	16213800	NA	SPEN-001	ENSP00000364912	spen homolog, transcriptional regulator (Drosophila) [Source:HGNC Symbol;Acc:17575]	+	CDS	overlapping	0	9.33098	9.53194	9.74309	9.80359	9.03617	9.26741	9.6372	8.92242	9.2586	9.72483	8.17284	9.46708	9.98927	9.96339	9.61632	8.50258	9.8096	8.11399	9.4313	10.0468
Chr1:16224001-16225050	1	16224001	16225050	NA	SPEN-001	ENSP00000364912	spen homolog, transcriptional regulator (Drosophila) [Source:HGNC Symbol;Acc:17575]	+	CDS	overlapping	0	4.04096	4.77706	6.95882	7.98272	7.91886	5.69483	5.34442	6.67712	2.62924	4.97664	1.85693	3.32413	4.49942	3.24914	6.55529	6.47792	3.99434	4.3414	5.90079	4.77828
Chr1:16301551-16303350	1	16301551	16303350	NA	null					Not found	0	9.42033	9.73457	9.18121	9.05434	8.7211	9.04605	9.61046	9.28266	10.1397	9.53888	9.41663	8.89903	9.75681	9.35767	9.0703	9.53582	9.02522	8.71063	9.38191	9.93724
Chr1:16311751-16312800	1	16311751	16312800	NA	null					Not found	0	3.62592	3.29163	5.37385	4.99133	7.03342	3.21679	3.70056	6.46299	3.85163	1.97664	2.27197	4.06109	3.30677	3.98611	3.8004	6.94186	4.2008	4.82683	2.73086	3.90381
Chr1:16320751-16321800	1	16320751	16321800	NA	null					Not found	0	4.62592	5.21763	4.66336	3.92094	3.45943	3.73136	4.15999	3.14106	4.95117	3.29857	4.85693	5.38302	5.08438	3.47154	3.38536	3.2049	4.81747	4.60443	4.53822	6.6764
Chr1:16338601-16340700	1	16338601	16340700	NA	HSPB7-003	ENSP00000391578	heat shock 27kDa protein family, member 7 (cardiovascular) [Source:HGNC Symbol;Acc:5249]	-	CDS	upstream	1375	7.61081	8.08864	7.72749	8.59902	8.85175	7.00934	8.41481	8.72603	7.2731	8.21504	9.5984	7.62181	7.25431	6.59492	7.99022	7.82939	7.56069	9.77436	6.94032	9.13263
Chr1:16359001-16360050	1	16359001	16360050	NA	CLCNKA-002	ENSP00000364844	chloride channel Ka [Source:HGNC Symbol;Acc:2026]	+	CDS	overlapping	0	5.43327	5.36202	4.11082	3.92094	4.9542	4.21679	5.28553	6.51958	6.53613	5.43607	5.62952	4.32413	5.58688	4.75164	3.38536	4.07937	4.46383	6.9423	6.01626	6.56678
Chr1:16364701-16365600	1	16364701	16365600	NA	CLCNKA-002	ENSP00000364844	chloride channel Ka [Source:HGNC Symbol;Acc:2026]	+	CDS	upstream	4548	2.62592	4.67014	4.52586	2.59902	4.45943	3.40943	4.87049	2.4041	8.74472	3.78399	0.271968	3.06109	3.82135	2.98611	2.53736	4.32038	2.61583	4.43451	4.31582	6.07374
Chr1:16381951-16383150	1	16381951	16383150	NA	CLCNKB-001	ENSP00000364831	chloride channel Kb [Source:HGNC Symbol;Acc:2027]	+	CDS	overlapping	0	5.12842	5.05716	4.29139	4.76894	5.80735	3.86886	5.74496	4.9066	7.55207	4.97664	4.5199	4.1986	4.30677	3.24914	4.3029	5.1435	3.29391	5.1894	4.97879	7.10021
Chr1:16408351-16409700	1	16408351	16409700	NA	null					Not found	0	6.28888	6.55466	6.20393	4.76894	6.42626	6.29207	5.91002	4.51958	8.28268	5.22457	4.91582	5.98709	7.41828	5.12361	5.21544	5.94186	6.2481	6.62433	5.37472	7.40631
Chr1:16464751-16467300	1	16464751	16467300	NA	EPHA2-001	ENSP00000351209	EPH receptor A2 [Source:HGNC Symbol;Acc:3386]	-	CDS	overlapping	0	7.416	6.80259	8.86214	8.26435	9.50581	9.74035	7.38706	6.65203	6.40183	5.14656	7.02686	9.35019	9.0269	5.98611	7.16963	9.80729	9.53231	6.64396	6.28545	8.87344
Chr1:16513801-16516350	1	16513801	16516350	NA	null					Not found	0	7.04096	6.21763	6.69578	6.40637	8.07146	7.6286	6.15999	6.86353	9.44516	6.62049	7.04015	8.41159	8.33862	5.91211	5.16963	7.63116	8.62033	7.74739	6.25442	7.93356
Chr1:16562101-16564500	1	16562101	16564500	NA	RSG1-001	ENSP00000364749	REM2 and RAB-like small GTPase 1 [Source:HGNC Symbol;Acc:28127]	-	CDS	overlapping	0	9.37187	9.88856	9.3888	9.24648	9.20701	9.53096	9.53029	8.94842	10.4934	8.74482	9.25496	8.26273	9.85917	9.03922	8.90194	9.24199	8.67761	8.95415	9.09718	9.69389
Chr1:16570201-16571700	1	16570201	16571700	NA	null					Not found	0	6.59554	7.50886	6.52586	5.59902	5.61471	6.13735	5.60745	6.2454	9.29694	6.10592	5.94439	5.4396	7.63897	6.0565	3.38536	5.7074	5.46383	6.36525	5.58884	7.87344
Chr1:16650451-16651650	1	16650451	16651650	NA	null					Not found	0	6.04096	5.72459	7.68774	6.457	4.39232	6.05329	5.60745	4.72603	5.68813	5.73153	4.66429	5.06109	7.30677	5.30804	4.739	4.42729	6.78576	4.01947	6.01626	4.90381
Chr1:16677751-16680000	1	16677751	16680000	NA	null					Not found	0	10.2504	10.505	9.66745	9.71276	9.52943	9.76478	9.98133	9.96379	10.4579	10.2941	10.1268	9.65205	10.1842	10.0651	9.35754	9.72846	9.75743	9.50329	9.94518	10.2437
Chr1:16692901-16695150	1	16692901	16695150	NA	C1orf144-001	ENSP00000383866	chromosome 1 open reading frame 144 [Source:HGNC Symbol;Acc:30232]	+	CDS	overlapping	0	10.0633	10.3118	9.96382	9.95657	9.70563	9.94859	10.1121	9.67089	10.2217	9.99623	9.91402	10.2088	10.1576	9.9951	9.73114	9.96423	9.97514	9.64152	9.96927	10.3632
Chr1:16766251-16768200	1	16766251	16768200	NA	NECAP2-001	ENSP00000338746	NECAP endocytosis associated 2 [Source:HGNC Symbol;Acc:25528]	+	CDS	overlapping	0	9.22087	9.59541	9.23735	8.96534	8.71425	9.13394	9.36234	9.18108	9.92692	9.31203	9.69193	9.19037	9.6517	9.28623	8.57738	9.38812	9.15809	9.13841	9.35291	9.47872
Chr1:16825351-16826550	1	16825351	16826550	NA	null					Not found	0	9.06332	9.66667	8.68371	9.00416	8.59619	8.75816	9.08858	9.27857	10.0639	9.53123	9.6207	8.24696	9.54654	9.49707	8.87365	9.4176	8.59769	9.13841	9.06178	9.82268
Chr1:16839901-16841250	1	16839901	16841250	NA	null					Not found	0	9.5408	9.83389	9.29404	9.44137	9.00843	9.08539	9.28928	9.39656	9.89603	9.60235	9.21448	9.15702	9.42126	9.42905	9.20128	9.35126	8.93415	8.85657	9.30829	9.50373
Chr1:16857901-16858650	1	16857901	16858650	NA	AL355149.1-201	ENSP00000349853	No description	+	CDS	downstream	3630	4.04096	3.77706	4.01128	5.68648	3.70044	3.57936	3.87049	3.4041	3.62924	4.5616	3.44189	1.73916	4.30677	3.47154	2.8004	2.2049	3.61583	3.01947	4.19029	3.90381
Chr1:16872001-16872750	1	16872001	16872750	NA	null					Not found	0	2.62592	1.9697	3.20393	4.99133	5.70044	3.73136	2.70056	2.4041	1.04428	0.976638	2.85693	0.739163	2.08438	2.66418	2.53736	1.61994	0.293905	3.24186	0.730862	2.90381
Chr1:16947001-16948650	1	16947001	16948650	NA	null					Not found	0	8.22087	8.95269	8.16971	8.48166	9.06878	8.16432	7.34442	7.27857	8.30167	7.57655	9.00329	6.73916	8.13604	7.32239	7.74682	7.02933	6.54183	8.81389	6.75323	8.22574
Chr1:16970551-16971900	1	16970551	16971900	NA	null					Not found	0	10.4333	10.4991	9.94033	10.1401	9.58871	9.93691	10.0021	10.0188	10.4914	10.3797	9.94792	9.59403	10.163	9.9565	9.77386	10.1078	9.3546	9.89599	9.98825	10.11
Chr1:17004301-17005350	1	17004301	17005350	NA	AL137798.1-201	ENSP00000408511	UPF0627 protein ENSP00000341061/ENSP00000339743 [Source:UniProtKB/Swiss-Prot;Acc:A6NEA5]	+	CDS	upstream	4294	4.04096	5.21763	5.20393	5.59902	4.80735	4.93299	4.50792	3.14106	3.85163	3.29857	2.27197	2.32413	5.08438	3.24914	3.8004	3.78986	1.87887	4.01947	4.81832	5.48878
Chr1:17026351-17029050	1	17026351	17029050	NA	null					Not found	0	6.7414	10.3051	8.58763	10.4878	7.79442	6.69483	7.53345	7.70178	7.48722	7.20546	9.13925	4.90909	6.40631	6.47154	5.77003	6.47792	4.38137	6.79206	7.07071	6.5283
Chr1:17053201-17055150	1	17053201	17055150	NA	null					Not found	0	6.28888	6.82768	4.95882	6.05845	5	6.21679	6.65476	5.57402	6.17356	4.78399	3.7314	4.64605	6.22734	5.94958	4.60775	4.7074	3.29391	5.9891	5.68506	6.8107
Chr1:17222101-17223750	1	17222101	17223750	NA	null					Not found	0	9.36288	9.48145	7.53484	9.48166	9.28077	9.35194	8.98597	9.27857	10.158	9.51191	8.97241	6.23102	9.2775	9.62997	8.91588	9.05873	7.28259	8.74739	8.7024	8.18921
Chr1:17239801-17241300	1	17239801	17241300	NA	null					Not found	0	9.4461	10.1067	8.86571	8.88904	8.81698	9.40095	9.70619	9.47019	10.4515	9.95105	10.0841	8.83192	9.75681	10.1113	8.57738	9.4748	9.00126	9.79426	9.17795	10.3822
Chr1:17286751-17288250	1	17286751	17288250	NA	CROCC-001	ENSP00000364691	ciliary rootlet coiled-coil, rootletin [Source:HGNC Symbol;Acc:21299]	+	CDS	overlapping	0	6.9236	3.9697	7.32287	7.55321	3.70044	8.19079	7.35877	7.17669	5.13174	6.53123	4.91582	8.13148	8.36978	6.61838	6.92968	7.7074	8.7327	3.60443	6.34557	7.22574
Chr1:17305651-17308500	1	17305651	17308500	NA	MFAP2-001	ENSP00000364685	microfibrillar-associated protein 2 [Source:HGNC Symbol;Acc:7033]	-	CDS	downstream	883	5.12842	6.9239	8.4231	9.23564	6.6865	10.8482	8.09288	8.04795	9.0832	6.02103	10.0468	10.7931	7.88312	5.91211	8.33956	8.40784	10.6315	5.56379	6.6616	7.04677
Chr1:17372401-17373300	1	17372401	17373300	NA	SDHB-001	ENSP00000364649	succinate dehydrogenase complex, subunit B, iron sulfur (Ip) [Source:HGNC Symbol;Acc:10681]	-	CDS	overlapping	0	5.04096	5.82768	6.2263	5.40637	4.16993	5.45382	5.45545	3.98906	6.90226	5.5002	2.85693	5.32413	6.08438	3.83411	4.3029	3.42729	6.38137	4.01947	5.94032	5.84241
Chr1:17379601-17381250	1	17379601	17381250	NA	SDHB-001	ENSP00000364649	succinate dehydrogenase complex, subunit B, iron sulfur (Ip) [Source:HGNC Symbol;Acc:10681]	-	CDS	overlapping	0	9.12842	9.75106	9.04313	8.82302	8.56605	8.72231	9.21626	9.55723	9.52406	9.10592	9.49114	8.4396	9.80548	9.23783	8.81906	9.21239	8.53708	8.81389	8.93053	9.59962
Chr1:17454151-17455800	1	17454151	17455800	NA	null					Not found	0	6.50039	4.42913	9.93355	10.0646	9.70736	8.70405	7.41481	9.30295	5.95117	7.24342	5.48142	9.86587	8.41828	6.15603	9.63118	9.96201	9.44111	8.16922	8.77526	7.40631
Chr1:17494051-17496600	1	17494051	17496600	NA	null					Not found	0	5.94785	5.49326	8.06191	7.83742	8.29002	6.08186	5.94849	8.07652	5.2142	5.29857	3.7314	10.5417	6.17184	5.30804	6.04833	9.79236	9.63153	5.9891	5.63775	7.8107
Chr1:17533501-17536350	1	17533501	17536350	NA	PADI1-001	ENSP00000364620	peptidyl arginine deiminase, type I [Source:HGNC Symbol;Acc:18367]	+	CDS	overlapping	0	7.01824	6.13963	7.58763	5.80847	8.37069	6.73136	6.09288	7.5606	5.68813	5.83462	4.27197	8.15702	7.21367	5.87364	6.28153	7.71797	7.59769	7.46793	5.94032	8.33008
Chr1:17541301-17542650	1	17541301	17542650	NA	PADI1-001	ENSP00000364620	peptidyl arginine deiminase, type I [Source:HGNC Symbol;Acc:18367]	+	CDS	overlapping	0	5.12842	4.87659	5.29139	4.84694	5.35755	4.10987	4.401	3.98906	4.62924	3.5616	3.27197	6.84769	4.95885	4.91211	3.38536	5.7074	5.96633	5.07836	4.31582	6.40631
Chr1:17552551-17553750	1	17552551	17553750	NA	PADI1-001	ENSP00000364620	peptidyl arginine deiminase, type I [Source:HGNC Symbol;Acc:18367]	+	CDS	overlapping	0	4.04096	2.9697	4.78889	4.50591	5.80735	5.16432	4.28553	4.81914	4.62924	4.5616	3.7314	5.90909	3.95885	2.66418	3.02279	3.94186	5.46383	4.82683	3.05279	5.77828
Chr1:17558851-17561400	1	17558851	17561400	NA	PADI1-001	ENSP00000364620	peptidyl arginine deiminase, type I [Source:HGNC Symbol;Acc:18367]	+	CDS	overlapping	0	5.7414	5.72459	8.63856	9.31669	9.37287	7.22961	6.55854	8.15899	5.90226	5.97664	4.44189	10.1315	7.02298	4.24914	7.62483	9.76968	9.37871	5.89394	6.97879	6.99128
Chr1:17576251-17578950	1	17576251	17578950	NA	PADI3-001	ENSP00000364609	peptidyl arginine deiminase, type III [Source:HGNC Symbol;Acc:18337]	+	CDS	overlapping	0	5.68481	4.67014	8.58763	7.43191	8.224	6.61888	6.02249	6.37372	6.17356	5.36896	5.02686	7.33908	8.02298	5.52216	6.09808	8.49645	7.98041	4.60443	5.05279	7.07374
Chr1:17585251-17587200	1	17585251	17587200	NA	PADI3-001	ENSP00000364609	peptidyl arginine deiminase, type III [Source:HGNC Symbol;Acc:18337]	+	CDS	overlapping	0	5.04096	4.77706	6.13467	2.18398	5.24793	5.99439	5.22412	5.21145	5.62924	4.29857	4.79553	5.73916	6.6287	4.24914	4.3029	5.97749	4.75334	4.95807	3.90079	6.6764
Chr1:17613601-17614650	1	17613601	17614650	NA	PADI3-001	ENSP00000364609	peptidyl arginine deiminase, type III [Source:HGNC Symbol;Acc:18337]	+	CDS	upstream	4027	5.28888	4.42913	8.14057	6.70754	7.45121	6.93299	4.94849	6.06706	4.36621	2.5616	4.5939	7.29375	6.17184	3.66418	5.739	9.05456	7.60679	4.3414	4.05279	5.01929
Chr1:17674201-17675850	1	17674201	17675850	NA	PADI4-001	ENSP00000364597	peptidyl arginine deiminase, type IV [Source:HGNC Symbol;Acc:18368]	+	CDS	overlapping	0	5.12842	4.29163	5.75852	6.7283	7.82655	6.08186	4.15999	6.79642	5.04428	3.5616	5.88668	5.4396	4.08438	4.75164	5.60775	6.74922	4.10126	4.68244	5.19029	6.56678
Chr1:17732101-17733300	1	17732101	17733300	NA	RCC2-001	ENSP00000364585	regulator of chromosome condensation 2 [Source:HGNC Symbol;Acc:30297]	-	CDS	upstream	2286	5.21088	5.49326	5.69578	5.12258	4.52356	4.86886	4.28553	3.81914	5.36621	4.43607	4.5939	5.64605	5.14328	4.24914	3.53736	5.78986	4.93776	4.43451	4.97879	5.71117
Chr1:17786551-17787450	1	17786551	17787450	NA	null					Not found	0	3.84831	4.13963	3.66336	5.68648	5.20945	4.93299	3.87049	3.81914	7.79916	2.97664	4.44189	0.739163	5.02298	4.47154	2.8004	4.61994	1.87887	3.60443	5.19029	6.27305
Chr1:17813851-17815050	1	17813851	17815050	NA	null					Not found	0	4.04096	2.9697	5.01128	6.27144	8.02237	4.80175	5.22412	3.62649	4.62924	2.5616	5.35943	5.82663	3.82135	3.98611	3.8004	4.7074	4.68622	6.10693	5.12318	5.01929
Chr1:17820301-17821500	1	17820301	17821500	NA	null					Not found	0	4.50039	4.42913	4.95882	3.18398	5.2854	3.40943	3.70056	3.81914	6.17356	4.29857	3.44189	4.32413	5.30677	3.24914	3.02279	2.61994	4.61583	4.68244	3.73086	5.40631
Chr1:17828551-17829750	1	17828551	17829750	NA	null					Not found	0	5.28888	6.42913	6.06191	6.05845	6.14975	3.21679	5.74496	6.27857	8.4789	6.80953	7.43184	5.06109	5.78482	4.75164	3.91588	5.86786	6.17655	5.64396	5.53822	7.90381
Chr1:17846101-17847600	1	17846101	17847600	NA	null					Not found	0	5.12842	5.87659	4.72749	3.40637	3.45943	3.57936	5.65476	3.98906	5.99847	3.97664	3.5939	3.32413	5.02298	4.83411	2.8004	4.52683	3.46383	5.24186	4.31582	6.64078
Chr1:17871451-17872650	1	17871451	17872650	NA	null					Not found	0	6.25041	5.55466	6.03682	5.40637	6.16993	5.05329	5.94849	7.81914	8.39301	5.67708	7.52936	5.59714	7.52179	5.61838	1.8004	5.7074	6.86376	6.13495	7.01626	7.99128
Chr1:17880001-17881350	1	17880001	17881350	NA	null					Not found	0	5.79584	5.49326	6.54378	5.55321	5.24793	5.80175	5.98597	5.62649	6.85163	5.5616	5.82656	7.1986	5.82135	4.91211	4.02279	6.11179	7.41285	5.43451	5.77526	7.27305
Chr1:17895151-17897400	1	17895151	17897400	NA	null					Not found	0	10.0239	8.96405	9.02411	7.8658	9.45533	8.98308	9.82985	9.97648	10.0832	9.58766	10.3935	9.16962	9.93405	9.21493	7.55529	9.25656	9.57003	9.47068	9.36749	10.0468
Chr1:17950801-17952150	1	17950801	17952150	NA	ARHGEF10L-001	ENSP00000355060	Rho guanine nucleotide exchange factor (GEF) 10-like [Source:HGNC Symbol;Acc:25540]	+	CDS	overlapping	0	5.50039	4.77706	6.71172	3.76894	7.21917	6.38671	5.91002	4.4041	8.81906	5.78399	4.27197	7.65803	6.08438	4.91211	4.38536	5.78986	8.78576	4.95807	4.73086	5.96271
Chr1:18051301-18052350	1	18051301	18052350	NA	null					Not found	0	4.50039	4.13963	4.72749	2.18398	7.15987	3.21679	4.28553	3.4041	5.36621	2.97664	3.7314	3.06109	4.40631	3.47154	3.02279	4.61994	2.87887	3.43451	4.19029	6.36324
Chr1:18192751-18193800	1	18192751	18193800	NA	null					Not found	0	3.36288	3.77706	3.90437	2.18398	4.75489	5.57936	4.28553	5.77333	4.74472	4.29857	3.44189	8.25486	4.08438	3.98611	3.53736	7.11179	7.68622	4.75644	2.73086	4.77828
Chr1:18686401-18687450	1	18686401	18687450	NA	IGSF21-001	ENSP00000251296	immunoglobin superfamily, member 21 [Source:HGNC Symbol;Acc:28246]	+	CDS	overlapping	0	3.84831	3.29163	2.20393	2.59902	3.90689	1.99439	3.70056	3.81914	5.04428	3.78399	2.27197	3.54652	3.66934	3.83411	2.21544	0.619936	0.293905	1.43451	3.05279	3.64078
Chr1:18722401-18723450	1	18722401	18723450	NA	null					Not found	0	2.62592	3.29163	3.78889	0.599017	1	4.31632	4.15999	5.3427	5.13174	0.976638	2.27197	3.06109	2.82135	4.12361	1.8004	3.2049	3.46383	2.01947	3.31582	5.48878
Chr1:18740101-18741150	1	18740101	18741150	NA	null					Not found	0	2.62592	4.55466	3.01128	0.599017	0	0.40943	3.28553	4.4041	5.2142	3.29857	2.85693	0.739163	3.66934	3.24914	1.8004	0.619936	0.293905	2.43451	0.730862	5.48878
Chr1:18778951-18779700	1	18778951	18779700	NA	null					Not found	0	2.62592	3.77706	2.20393	0.599017	0	1.99439	2.28553	3.4041	3.62924	3.78399	0.271968	3.06109	3.08438	1.66418	2.21544	0.619936	3.29391	2.75644	0.730862	2.90381
Chr1:18806551-18807900	1	18806551	18807900	NA	KLHDC7A-001	ENSP00000383505	kelch domain containing 7A [Source:HGNC Symbol;Acc:26791]	+	CDS	overlapping	0	4.04096	3.29163	4.11082	5.76894	8.24317	7.5693	5.09288	3.98906	7.06664	2.97664	3.7314	3.90909	6.78482	4.36462	3.91588	7.33418	4.2939	5.79206	5.25442	7.96271
Chr1:18857101-18858150	1	18857101	18858150	NA	null					Not found	0	1.04096	2.55466	3.78889	1.59902	0	2.40943	3.50792	1.81914	5.2142	2.5616	2.85693	2.32413	3.30677	0.664182	0.215436	2.61994	1.87887	3.43451	3.05279	4.77828
Chr1:18934951-18935700	1	18934951	18935700	NA	null					Not found	0	3.04096	3.55466	0.203928	0.599017	2.32193	2.40943	4.60745	3.14106	3.3662	0.976638	0.271968	3.54652	3.66934	3.47154	1.8004	0.619936	2.29391	0.434509	2.31582	4.48878
Chr1:18944701-18945900	1	18944701	18945900	NA	null					Not found	0	3.36288	3.29163	2.20393	3.92094	6.44294	3.21679	4.50792	5.62649	2.62924	4.14656	2.27197	3.32413	1.49942	4.47154	1.8004	2.94186	2.87887	3.24186	3.05279	4.1262
Chr1:19146901-19147800	1	19146901	19147800	NA	null					Not found	0	2.04096	4.29163	3.20393	2.18398	2	2.99439	4.60745	2.4041	3.62924	3.29857	3.97241	2.73916	3.95885	2.98611	1.21544	0.619936	2.61583	2.01947	2.73086	5.31885
Chr1:19201351-19202400	1	19201351	19202400	NA	ALDH4A1-002	ENSP00000290597	aldehyde dehydrogenase 4 family, member A1 [Source:HGNC Symbol;Acc:406]	-	CDS	overlapping	0	4.94785	6.09898	4.59625	4.40637	4	4.93299	5.34442	3.81914	5.2922	5.14656	5.02686	4.73916	4.89174	3.98611	4.21544	4.78986	3.46383	4.43451	4.4313	6.27305
Chr1:19210351-19211400	1	19210351	19211400	NA	ALDH4A1-002	ENSP00000290597	aldehyde dehydrogenase 4 family, member A1 [Source:HGNC Symbol;Acc:406]	-	CDS	overlapping	0	5.28888	4.77706	4.72749	4.29946	4	5.10987	5.22412	4.4041	4.85163	4.78399	4.35943	0.739163	4.58688	3.47154	2.8004	3.2049	1.87887	4.01947	3.73086	6.5283
Chr1:19228051-19230150	1	19228051	19230150	NA	ALDH4A1-002	ENSP00000290597	aldehyde dehydrogenase 4 family, member A1 [Source:HGNC Symbol;Acc:406]	-	CDS	overlapping	0	9.84186	9.96405	9.32546	8.57056	8.81378	9.01306	9.68925	9.29892	9.87082	9.77754	9.86816	8.64605	9.97718	9.93798	9.03242	9.4111	8.78976	8.48979	9.47905	9.87727
Chr1:19239151-19240200	1	19239151	19240200	NA	IFFO2-001	ENSP00000387941	intermediate filament family orphan 2 [Source:HGNC Symbol;Acc:27006]	-	CDS	overlapping	0	6.36288	7.09898	6.80384	6.50591	6.06609	7.30425	5.74496	5.98906	6.62924	6.36896	7.22616	7.18211	6.94236	5.75164	5.70729	6.92372	6.59769	6.97367	6.6135	7.38494
Chr1:19252501-19255350	1	19252501	19255350	NA	IFFO2-001	ENSP00000387941	intermediate filament family orphan 2 [Source:HGNC Symbol;Acc:27006]	-	CDS	overlapping	0	7.69917	7.32725	9.82964	10.5415	9.97871	9.78664	9.03595	8.0383	8.2731	7.62049	10.4778	9.69045	9.09188	7.70858	10.3357	10.5727	9.44365	9.23217	9.27776	9.19537
Chr1:19258501-19259700	1	19258501	19259700	NA	IFFO2-001	ENSP00000387941	intermediate filament family orphan 2 [Source:HGNC Symbol;Acc:27006]	-	CDS	overlapping	0	5.36288	5.42913	6.98529	7.84694	6.47573	8.72684	6.42848	5.98906	7.67363	6.26204	6.64701	4.90909	5.95885	5.18774	4.67487	6.26379	5.99434	4.43451	5.25442	7.64078
Chr1:19291801-19293000	1	19291801	19293000	NA	null					Not found	0	6.39851	4.55466	7.59625	6.62138	7.45943	5.8357	6.34442	7.06706	5.13174	5.14656	4.5939	2.32413	5.30677	5.24914	6.7546	7.51475	3.29391	4.68244	5.58884	6.77828
Chr1:19298101-19299600	1	19298101	19299600	NA	null					Not found	0	4.94785	5.29163	5.33321	4.99133	4.9542	4.99439	5.70056	4.72603	4.50371	5.0641	2.5939	3.32413	4.40631	4.47154	4.21544	4.42729	3.61583	4.13495	3.31582	6.99128
Chr1:19535701-19537950	1	19535701	19537950	NA	UBR4-001	ENSP00000364403	ubiquitin protein ligase E3 component n-recognin 4 [Source:HGNC Symbol;Acc:30313]	-	CDS	overlapping	0	10.4247	10.4188	9.97211	10.0461	9.63844	10.0168	9.8195	10.2621	10.5098	10.1441	10.0151	9.77259	10.1736	10.154	9.67076	9.81715	9.74305	8.92636	9.69953	10.2407
Chr1:19577251-19579350	1	19577251	19579350	NA	KIAA0090-003	ENSP00000420608	KIAA0090 [Source:HGNC Symbol;Acc:28957]	-	CDS	overlapping	0	10.3696	10.8073	10.0835	10.0211	9.66889	10.0019	10.2552	10.1252	10.3886	10.2918	10.286	9.78629	10.261	10.148	9.77768	9.99062	9.34647	9.5969	9.90329	10.3245
Chr1:19662601-19664550	1	19662601	19664550	NA	CAPZB-001	ENSP00000364286	capping protein (actin filament) muscle Z-line, beta [Source:HGNC Symbol;Acc:1491]	-	CDS	upstream	1474	5.04096	5.29163	6.13467	5.84694	5	5.57936	5.15999	5.57402	7.47054	4.14656	4.91582	5.4396	5.66934	5.41907	4.3029	6.07937	5.81747	4.75644	2.73086	6.5283
Chr1:19756201-19757400	1	19756201	19757400	NA	CAPZB-008	ENSP00000401010	capping protein (actin filament) muscle Z-line, beta [Source:HGNC Symbol;Acc:1491]	-	CDS	overlapping	0	7.56452	5.82768	7.64687	8.49383	7.70044	8.96018	8.55231	7.5606	6.36621	6.43607	9.61182	7.13148	8.23413	6.12361	7.04833	7.67522	8.61583	6.16243	7.80768	7.84241
Chr1:19766401-19767750	1	19766401	19767750	NA	CAPZB-008	ENSP00000401010	capping protein (actin filament) muscle Z-line, beta [Source:HGNC Symbol;Acc:1491]	-	CDS	overlapping	0	5.68481	5.82768	6.41338	8.86111	7.6865	7.05329	6.05812	5.14106	7.11037	5.67708	8.70242	8.22298	6.38206	5.30804	6.6417	7.09567	8.81747	4.01947	5.53822	7.71117
Chr1:19776901-19778100	1	19776901	19778100	NA	CAPZB-008	ENSP00000401010	capping protein (actin filament) muscle Z-line, beta [Source:HGNC Symbol;Acc:1491]	-	CDS	overlapping	0	4.50039	5.77706	8.08657	8.20635	7.2384	9.02414	6.31527	6.54706	9.61413	6.02103	8.05333	8.93884	6.08438	5.41907	7.46336	7.71797	9.41544	4.68244	6.40329	6.27305
Chr1:19795501-19796850	1	19795501	19796850	NA	CAPZB-008	ENSP00000401010	capping protein (actin filament) muscle Z-line, beta [Source:HGNC Symbol;Acc:1491]	-	CDS	overlapping	0	4.84831	5.61356	6.84778	7.68648	6.96578	7.13735	5.02249	3.98906	6.2922	4.88353	6.31636	7.60953	6.28078	5.70858	4.97032	6.17453	8.54183	4.13495	6.4313	6.64078
Chr1:19885801-19886700	1	19885801	19886700	NA	null					Not found	0	4.36288	3.29163	5.20393	4.92094	4.08746	5.26741	3.02249	3.81914	5.62924	2.5616	2.5939	6.32413	4.30677	2.24914	3.02279	4.7074	7.07526	3.75644	3.31582	4.64078
Chr1:19922401-19924650	1	19922401	19924650	NA	MINOS1-001	ENSP00000325562	mitochondrial inner membrane organizing system 1 [Source:HGNC Symbol;Acc:32068]	+	CDS	overlapping	0	9.89582	10.362	9.99672	10.582	10.0928	10.1891	10.1944	10.2642	10.1344	9.88653	10.0185	9.82663	10.2358	10.0414	9.91761	10.0483	9.77166	9.87745	9.74767	10.3357
Chr1:19962001-19962900	1	19962001	19962900	NA	null					Not found	0	3.36288	4.29163	4.52586	4.84694	5.39232	6.61888	4.02249	4.27857	5.2922	3.78399	5.27197	4.82663	4.49942	4.24914	4.12233	3.94186	7.21277	4.75644	4.4313	5.77828
Chr1:20030701-20031600	1	20030701	20031600	NA	TMCO4-002	ENSP00000364269	transmembrane and coiled-coil domains 4 [Source:HGNC Symbol;Acc:27393]	-	CDS	overlapping	0	4.7414	4.87659	5.15812	6.9028	7.02237	4.86886	4.401	4.51958	5.90226	4.97664	4.66429	5.54652	5.49942	3.98611	5.3029	4.7074	5.15189	5.07836	4.05279	7.60425
Chr1:20041801-20042850	1	20041801	20042850	NA	TMCO4-002	ENSP00000364269	transmembrane and coiled-coil domains 4 [Source:HGNC Symbol;Acc:27393]	-	CDS	overlapping	0	4.04096	4.29163	5.56148	6.09087	4.75489	4.10987	4.60745	3.81914	5.36621	4.14656	4.5939	3.73916	4.58688	3.83411	5.16963	3.94186	4.46383	4.68244	3.53822	5.48878
Chr1:20076901-20077650	1	20076901	20077650	NA	TMCO4-002	ENSP00000364269	transmembrane and coiled-coil domains 4 [Source:HGNC Symbol;Acc:27393]	-	CDS	overlapping	0	3.84831	4.29163	5.37385	3.59902	4.32193	4.80175	3.50792	2.4041	3.85163	4.14656	2.5939	4.06109	4.58688	2.98611	3.91588	4.2049	2.87887	3.60443	3.73086	6.01929
Chr1:20091301-20092950	1	20091301	20092950	NA	TMCO4-002	ENSP00000364269	transmembrane and coiled-coil domains 4 [Source:HGNC Symbol;Acc:27393]	-	CDS	overlapping	0	3.84831	4.55466	8.54378	8.34721	7.35755	8.16432	6.15999	8.9066	4.62924	5.14656	8.35412	9.25486	7.06928	3.98611	8.83749	8.71797	8.99434	5.9891	5.73086	8.89628
Chr1:20187301-20188200	1	20187301	20188200	NA	null					Not found	0	3.84831	3.77706	6.18121	7.24287	6.22882	4.80175	5.45545	3.62649	4.36621	3.29857	2.5939	3.90909	5.02298	0.664182	7.85206	5.42729	3.46383	3.43451	3.53822	6.07374
Chr1:20193001-20193900	1	20193001	20193900	NA	null					Not found	0	4.04096	3.77706	6.20393	7.62138	7.78136	4.99439	5.22412	5.98906	3.85163	4.97664	3.44189	6.73916	5.14328	3.47154	8.02922	5.52683	6.92326	4.24186	4.73086	5.22574
Chr1:20208151-20209800	1	20208151	20209800	NA	OTUD3-001	ENSP00000364261	OTU domain containing 3 [Source:HGNC Symbol;Acc:29038]	+	CDS	overlapping	0	9.43756	9.95839	9.50084	9.64614	9.20701	9.31331	9.55231	9.45938	10.0443	9.63485	9.58938	8.90407	9.71131	9.61255	9.41019	9.66433	8.98739	8.95021	9.36022	10.0637
Chr1:20229751-20230950	1	20229751	20230950	NA	OTUD3-001	ENSP00000364261	OTU domain containing 3 [Source:HGNC Symbol;Acc:29038]	+	CDS	overlapping	0	4.21088	4.13963	5.63019	6.12258	6.78136	4.10987	4.87049	3.14106	5.2142	3.29857	1.85693	3.06109	4.30677	3.66418	4.46336	4.52683	3.10126	3.75644	4.31582	5.96271
Chr1:20244301-20245050	1	20244301	20245050	NA	PLA2G2E-001	ENSP00000364257	phospholipase A2, group IIE [Source:HGNC Symbol;Acc:13414]	-	CDS	upstream	1750	1.04096	4.13963	4.52586	4.84694	3.45943	3.21679	5.15999	2.4041	7.45367	5.43607	1.27197	3.06109	4.74735	2.24914	5.739	3.94186	3.10126	5.56379	5.77526	6.40631
Chr1:20250751-20253900	1	20250751	20253900	NA	PLA2G2E-001	ENSP00000364257	phospholipase A2, group IIE [Source:HGNC Symbol;Acc:13414]	-	CDS	downstream	699	4.94785	5.61356	6.54378	5.55321	7.41785	8.89727	6.92938	5.27857	7.17356	5.93083	3.97241	4.64605	6.02298	3.98611	6.739	6.23465	3.10126	6.4789	5.94032	8.01929
Chr1:20275201-20276250	1	20275201	20276250	NA	null					Not found	0	2.62592	1.9697	5.69578	3.92094	5.16993	5.69483	5.22412	5.81914	5.95117	3.78399	4.07932	4.4396	4.08438	3.83411	6.9569	5.90534	4.2008	4.82683	4.63775	5.64078
Chr1:20390101-20391150	1	20390101	20391150	NA	null					Not found	0	4.62592	4.13963	1.20393	5.3539	3.70044	5.93299	5.60745	3.98906	3.62924	5.62049	2.5939	5.78356	4.19986	3.83411	4.8004	6.29236	4.54183	4.82683	5.19029	6.74511
Chr1:20427001-20428200	1	20427001	20428200	NA	null					Not found	0	4.62592	5.49326	6.81864	8.93887	7.75489	5.36363	6.80909	6.57402	5.2142	7.43607	3.44189	4.64605	7.17184	3.47154	9.1638	7.4013	2.61583	8.61938	8.12318	9.7493
Chr1:20450551-20451750	1	20450551	20451750	NA	PLA2G2D-001	ENSP00000364246	phospholipase A2, group IID [Source:HGNC Symbol;Acc:9033]	-	CDS	downstream	4560	4.21088	4.77706	7.34348	9.16887	8.21917	4.40943	6.12683	4.4041	5.36621	7.29857	4.85693	2.32413	5.70887	3.83411	9.56416	6.78986	3.46383	8.16243	7.41736	9.15174
Chr1:20463151-20464350	1	20463151	20464350	NA	PLA2G2F-001	ENSP00000364243	phospholipase A2, group IIF [Source:HGNC Symbol;Acc:30040]	+	CDS	downstream	1571	4.84831	4.42913	4.95882	4.40637	4	2.73136	5.22412	3.98906	4.85163	4.97664	1.85693	3.73916	3.30677	3.24914	4.3029	2.94186	1.87887	5.79206	4.4313	6.87344
Chr1:20478451-20479650	1	20478451	20479650	NA	PLA2G2F-001	ENSP00000364243	phospholipase A2, group IIF [Source:HGNC Symbol;Acc:30040]	+	CDS	upstream	3557	4.36288	7.17915	8.09875	9.31669	8.04439	6.80175	8.39405	7.61355	8.90226	8.79682	5.35943	5.86845	8.78944	6.44554	9.27613	8.50258	6.35999	9.39451	8.70814	10.2287
Chr1:20521201-20522400	1	20521201	20522400	NA	UBXN10-001	ENSP00000364240	UBX domain protein 10 [Source:HGNC Symbol;Acc:26354]	+	CDS	upstream	3304	3.36288	3.55466	4.37385	5.24287	4.70044	3.57936	4.94849	3.98906	7.55207	3.5616	2.5939	0.739163	5.08438	3.83411	4.67487	3.42729	2.29391	6.21587	5.37472	7.8107
Chr1:20581951-20583000	1	20581951	20583000	NA	null					Not found	0	5.62592	2.9697	7.13467	8.95657	8.75822	5.40943	6.76665	7.14106	8.69533	5.78399	1.85693	4.82663	9.13241	7.24914	9.15502	7.46543	3.10126	5.75644	7.76428	7.84241
Chr1:20706601-20707800	1	20706601	20707800	NA	null					Not found	0	5.04096	3.29163	8.92844	9.03365	9.1267	7.82728	6.37299	8.11376	6.36621	6.29857	6.22616	4.82663	6.33231	3.66418	9.0858	9.17836	5.10126	5.82683	6.86015	6.90381
Chr1:20737201-20738550	1	20737201	20738550	NA	null					Not found	0	4.7414	4.87659	8.4036	6.80847	8.633	7.31632	7.05812	7.77333	9.65161	7.847	5.35943	7.38302	6.72824	6.66418	7.6417	8.81961	7.87133	4.95807	7.08841	8.57624
Chr1:20752951-20754150	1	20752951	20754150	NA	null					Not found	0	4.36288	4.13963	7.72749	8.05845	8.60733	7.17761	5.74496	8.77914	5.85163	7.14656	8.24925	8.1142	7.63897	3.66418	8.39036	9.23096	7.69478	7.35337	6.95968	7.74511
Chr1:20806501-20808750	1	20806501	20808750	NA	CAMK2N1-001	ENSP00000364219	calcium/calmodulin-dependent protein kinase II inhibitor 1 [Source:HGNC Symbol;Acc:24190]	-	CDS	upstream	1392	4.7414	5.82768	5.72749	6.92095	5.52356	4.73136	5.74496	6.43385	7.11037	7.08516	4.79553	6.13148	6.8032	5.57107	6.32396	7.24929	5.57931	7.72913	6.28545	9.09364
Chr1:20819851-20823750	1	20819851	20823750	NA	MUL1-001	ENSP00000264198	mitochondrial E3 ubiquitin protein ligase 1 [Source:HGNC Symbol;Acc:25762]	-	CDS	upstream	3433	7.43327	8.21763	9.68573	9.72314	9.77972	9.06764	8.71737	10.2221	10.4579	9.41543	8.7066	9.27444	10.0425	8.51593	10.1148	10.4417	8.00126	9.60193	9.04827	10.562
Chr1:20833801-20835300	1	20833801	20835300	NA	MUL1-001	ENSP00000264198	mitochondrial E3 ubiquitin protein ligase 1 [Source:HGNC Symbol;Acc:25762]	-	CDS	overlapping	0	8.76206	9.24582	8.93185	9.19521	8.97154	8.64305	8.93897	9.24959	8.86446	8.90145	9.11432	8.36852	9.24425	8.893	8.9569	9.07526	8.25969	8.6966	8.41736	9.00535
Chr1:20848501-20849550	1	20848501	20849550	NA	null					Not found	0	3.84831	4.29163	4.11082	4.05845	4.16993	3.86886	3.70056	4.72603	5.68813	3.78399	4.17886	3.06109	4.40631	4.47154	3.8004	2.94186	3.10126	5.38871	5.31582	6.01929
Chr1:20929351-20931450	1	20929351	20931450	NA	CDA-001	ENSP00000364212	cytidine deaminase [Source:HGNC Symbol;Acc:1712]	+	CDS	overlapping	0	4.94785	5.49326	6.90437	4.05845	6.76818	5.61888	5.60745	5.46299	8.77899	3.29857	4.07932	6.82663	5.40631	4.24914	8.42489	6.50258	6.61583	4.82683	4.31582	6.22574
Chr1:20938201-20941350	1	20938201	20941350	NA	CDA-001	ENSP00000364212	cytidine deaminase [Source:HGNC Symbol;Acc:1712]	+	CDS	overlapping	0	7.50039	6.85234	9.35875	8.81334	9.85643	8.69945	7.27042	8.31898	8.92079	8.16646	9.13306	6.80525	6.97515	5.94958	9.75265	8.95533	7.95924	6.43451	7.57635	8.11327
Chr1:20959201-20961750	1	20959201	20961750	NA	PINK1-001	ENSP00000364204	PTEN induced putative kinase 1 [Source:HGNC Symbol;Acc:14581]	+	CDS	overlapping	0	8.51669	8.58441	8.30196	8.16887	8.33092	8.44835	8.70056	8.52649	9.47473	8.684	9.29711	7.8372	8.91727	8.47154	8.92624	9.1435	8.68192	7.73829	8.98825	9.08703
Chr1:20966251-20967150	1	20966251	20967150	NA	PINK1-001	ENSP00000364204	PTEN induced putative kinase 1 [Source:HGNC Symbol;Acc:14581]	+	CDS	overlapping	0	4.62592	4.77706	4.90437	3.59902	3.70044	4.31632	4.87049	3.81914	5.95117	4.97664	4.07932	2.73916	4.82135	4.47154	3.53736	3.78986	3.99434	4.01947	4.31582	6.44813
Chr1:21051151-21052650	1	21051151	21052650	NA	SH2D5-001	ENSP00000364171	SH2 domain containing 5 [Source:HGNC Symbol;Acc:28819]	-	CDS	overlapping	0	5.7414	5.55466	4.90437	4.05845	5.83289	5.21679	4.78803	5.77333	6.25373	3.78399	5.7314	6.26273	5.49942	4.57107	3.38536	6.59722	5.15189	5.24186	5.12318	6.31885
Chr1:21058501-21060450	1	21058501	21060450	NA	SH2D5-003	ENSP00000406026	SH2 domain containing 5 [Source:HGNC Symbol;Acc:28819]	-	CDS	downstream	3964	7.1907	7.61356	8.47539	8.83264	9.60918	8.17762	8.05812	9.91453	8.79916	7.94242	9.87745	9.58465	7.93405	7.36462	9.41265	9.86073	8.54657	7.01947	7.87041	7.93356
Chr1:21348301-21349800	1	21348301	21349800	NA	EIF4G3-204	ENSP00000383266	eukaryotic translation initiation factor 4 gamma, 3 [Source:HGNC Symbol;Acc:3298]	-	CDS	overlapping	0	7.1907	6.46155	8.91817	9.71796	8.72792	9.02046	7.0756	8.58732	5.74472	6.97664	7.06638	8.54652	8.84815	6.27889	9.17254	6.1435	9.14253	6.73829	8.38191	7.5283
Chr1:21417151-21418350	1	21417151	21418350	NA	EIF4G3-204	ENSP00000383266	eukaryotic translation initiation factor 4 gamma, 3 [Source:HGNC Symbol;Acc:3298]	-	CDS	overlapping	0	5.43327	6.69762	7.90437	7.88442	7.32193	7.77575	7.00434	6.46299	5.62924	7.67708	5.88668	7.09672	8.8788	7.65287	7.83749	6.29236	8.44365	7.62433	7.78614	8.83455
Chr1:21475801-21477150	1	21475801	21477150	NA	EIF4G3-204	ENSP00000383266	eukaryotic translation initiation factor 4 gamma, 3 [Source:HGNC Symbol;Acc:3298]	-	CDS	overlapping	0	9.61839	9.87659	8.51227	8.31326	8.13955	8.08891	9.71458	8.22002	5.79916	9.69774	7.50079	8.73916	9.54654	9.8712	8.1638	6.72846	8.82529	7.36525	9.15713	9.70255
Chr1:21521401-21522450	1	21521401	21522450	NA	null					Not found	0	6.04096	6.69762	5.78889	5.18398	5.61471	5.80175	5.34442	5.77333	6.2142	5.83462	5.22616	5.32413	6.90881	5.41907	4.91588	4.94186	6.31627	5.79206	5.48575	6.74511
Chr1:21578251-21579450	1	21578251	21579450	NA	ECE1-001	ENSP00000405088	endothelin converting enzyme 1 [Source:HGNC Symbol;Acc:3146]	-	CDS	overlapping	0	5.36288	4.77706	8.87635	9.47246	8.80735	9.82306	6.60745	5.67712	7.55207	5.5002	6.50079	7.59714	8.25431	7.50967	5.07342	8.38812	8.72853	4.82683	5.37472	7.84241
Chr1:21587101-21589650	1	21587101	21589650	NA	ECE1-001	ENSP00000405088	endothelin converting enzyme 1 [Source:HGNC Symbol;Acc:3146]	-	CDS	overlapping	0	8.35384	7.80259	10.3663	10.6379	10.1636	10.2829	10.1964	10.2642	8.72376	8.76454	10.068	10.1443	10.5506	9.67261	9.49852	10.2105	10.4296	10.2642	9.60123	10.9555
Chr1:21620401-21622500	1	21620401	21622500	NA	ECE1-001	ENSP00000405088	endothelin converting enzyme 1 [Source:HGNC Symbol;Acc:3146]	-	CDS	overlapping	0	5.68481	5.87659	9.45186	8.88442	8.72451	8.70864	5.94849	4.4041	6.95117	5.0641	7.75578	8.96316	6.90881	5.52216	5.83015	6.6423	9.83112	6.21587	6.01626	8.13903
Chr1:21628801-21630300	1	21628801	21630300	NA	ECE1-001	ENSP00000405088	endothelin converting enzyme 1 [Source:HGNC Symbol;Acc:3146]	-	CDS	overlapping	0	6.08535	5.67014	9.44948	8.93441	7.92481	9.19079	6.19242	4.81914	8.81906	5.5616	8.27759	9.31281	7.75681	6.24914	6.21544	7.45283	9.67328	6.07836	5.63775	6.90381
Chr1:21650401-21653700	1	21650401	21653700	NA	ECE1-001	ENSP00000405088	endothelin converting enzyme 1 [Source:HGNC Symbol;Acc:3146]	-	CDS	overlapping	0	8.1907	7.95839	10.9845	11.0242	10.5294	10.4193	8.57708	9.93548	9.74818	8.85928	9.74567	10.8927	10.3927	7.741	10.2639	10.8995	11.1612	9.38288	10.1317	10.3523
Chr1:21682201-21683250	1	21682201	21683250	NA	null					Not found	0	3.84831	0.969701	5.01128	4.05845	4.08746	4.57936	5.34442	3.62649	6.56784	2.5616	4.27197	3.06109	5.58688	4.83411	2.8004	2.94186	3.75334	3.89394	4.31582	7.64078
Chr1:21694651-21695850	1	21694651	21695850	NA	null					Not found	0	5.62592	4.55466	6.81864	5.88442	5.32193	6.13735	5.45545	5.14106	8.03296	5.5002	5.7314	6.29375	7.51065	5.83411	6.09808	5.61994	6.54183	6.10693	6.19029	7.91876
Chr1:21728101-21728850	1	21728101	21728850	NA	null					Not found	0	3.84831	0.969701	2.78889	2.92094	3	2.73136	3.87049	3.62649	3.62924	2.5616	1.27197	1.73916	1.49942	1.66418	5.46336	2.2049	2.61583	4.13495	3.90079	4.90381
Chr1:21765901-21767100	1	21765901	21767100	NA	NBPF3-002	ENSP00000340336	neuroblastoma breakpoint family, member 3 [Source:HGNC Symbol;Acc:25076]	+	CDS	downstream	4480	8.22087	8.56961	7.84778	7.34048	7.16993	7.66682	8.08427	7.92766	9.03296	8.25276	9.40639	6.90909	8.08438	8.10713	7.47282	8.13564	7.91596	7.22892	7.79695	7.69389
Chr1:21900301-21901800	1	21900301	21901800	NA	ALPL-001	ENSP00000363973	alkaline phosphatase, liver/bone/kidney [Source:HGNC Symbol;Acc:438]	+	CDS	overlapping	0	6.9236	6.49326	7.18121	6.457	8.22882	7.51795	6.94849	6.27857	10.2875	6.53123	5.48142	6.92899	7.2676	7.09045	7.21544	6.68603	5.3383	7.72913	6.31582	8.07374
Chr1:21913051-21914400	1	21913051	21914400	NA	null					Not found	0	6.87385	7.23649	5.78889	7.12258	8.00562	4.80175	6.50792	7.19418	9.66633	5.88353	7.21448	7.16543	6.11413	5.94958	5.85929	7.88672	7.17655	6.45688	5.90079	7.76179
Chr1:21920851-21922800	1	21920851	21922800	NA	RAP1GAP-001	ENSP00000363897	RAP1 GTPase activating protein [Source:HGNC Symbol;Acc:9858]	-	CDS	upstream	1413	4.84831	5.21763	4.29139	4.05845	5.20945	3.86886	5.28553	3.98906	8.7722	5.43607	5.40125	4.54652	5.70887	5.57107	3.67487	5.2049	3.46383	5.07836	4.63775	6.5283
Chr1:21933601-21935250	1	21933601	21935250	NA	RAP1GAP-001	ENSP00000363897	RAP1 GTPase activating protein [Source:HGNC Symbol;Acc:9858]	-	CDS	overlapping	0	5.21088	5.67014	4.01128	2.18398	6.83289	4.10987	5.87049	4.27857	5.56784	4.29857	6.33806	4.54652	4.82135	5.18774	5.34472	3.78986	3.10126	4.68244	4.81832	5.56678
Chr1:21953101-21954300	1	21953101	21954300	NA	RAP1GAP-201	ENSP00000290101	RAP1 GTPase activating protein [Source:HGNC Symbol;Acc:9858]	-	CDS	overlapping	0	5.79584	6.67014	4.11082	2.59902	7.19967	3.57936	6.12683	4.81914	6.90226	6.88353	5.31636	4.1986	6.08438	6.59492	4.12233	2.2049	0.293905	5.13495	4.63775	7.01929
Chr1:21964801-21966750	1	21964801	21966750	NA	RAP1GAP-201	ENSP00000290101	RAP1 GTPase activating protein [Source:HGNC Symbol;Acc:9858]	-	CDS	overlapping	0	7.17024	7.29163	6.29139	8.45077	9.10329	5.31632	6.85031	9.59721	7.85163	7.60599	6.02686	4.64605	7.28078	6.94958	9.32134	6.61994	1.87887	5.52197	6.34557	8.72824
Chr1:21985201-21986700	1	21985201	21986700	NA	null					Not found	0	5.28888	5.72459	3.66336	2.18398	4.16993	3.21679	4.78803	4.27857	7.06664	5.83462	5.12995	2.32413	6.22734	6.12361	3.91588	3.42729	2.61583	4.75644	4.63775	6.40631
Chr1:22108051-22110900	1	22108051	22110900	NA	USP48-001	ENSP00000309262	ubiquitin specific peptidase 48 [Source:HGNC Symbol;Acc:18533]	-	CDS	overlapping	0	10.4693	10.7445	10.1048	10.1727	9.99577	10.4742	10.131	10.3718	10.7464	10.3945	10.5654	10.1443	10.4681	10.3098	10.1343	10.1337	10.2525	9.59942	10.3271	10.344
Chr1:22127251-22128300	1	22127251	22128300	NA	null					Not found	0	2.04096	3.77706	3.20393	2.92094	4.90689	2.40943	3.50792	4.14106	5.13174	3.5616	3.07932	3.06109	4.30677	2.24914	3.02279	3.2049	3.10126	3.89394	4.31582	4.64078
Chr1:22188301-22189200	1	22188301	22189200	NA	HSPG2-001	ENSP00000363827	heparan sulfate proteoglycan 2 [Source:HGNC Symbol;Acc:5273]	-	CDS	overlapping	0	3.04096	4.67014	5.81864	5.24287	6.59991	4.10987	3.70056	7.6895	4.50371	2.5616	4.27197	4.54652	4.19986	2.24914	5.9968	4.78986	5.50336	2.43451	4.4313	5.31885
Chr1:22198051-22199250	1	22198051	22199250	NA	HSPG2-001	ENSP00000363827	heparan sulfate proteoglycan 2 [Source:HGNC Symbol;Acc:5273]	-	CDS	overlapping	0	4.94785	4.77706	5.29139	2.59902	3.45943	4.86886	4.94849	2.4041	7.32968	3.97664	3.5939	3.90909	4.58688	4.12361	4.67487	4.61994	4.38137	4.24186	4.05279	6.07374
Chr1:22245601-22246650	1	22245601	22246650	NA	HSPG2-001	ENSP00000363827	heparan sulfate proteoglycan 2 [Source:HGNC Symbol;Acc:5273]	-	CDS	overlapping	0	4.36288	4.87659	5.63019	4.29946	5.88264	6.99439	3.87049	4.9066	4.62924	5.5002	5.40125	6.09672	4.95885	3.83411	4.02279	5.78986	7.42319	4.60443	4.19029	5.64078
Chr1:22257151-22259100	1	22257151	22259100	NA	HSPG2-001	ENSP00000363827	heparan sulfate proteoglycan 2 [Source:HGNC Symbol;Acc:5273]	-	CDS	overlapping	0	5.12842	6.17915	6.54378	3.40637	5	8.50746	6.50792	4.62649	6.13174	5.93083	5.76382	8.96798	5.92568	5.0565	4.3029	6.07937	9.41803	6.41179	5.12318	7.34122
Chr1:22269001-22270050	1	22269001	22270050	NA	null					Not found	0	4.21088	5.72459	5.95882	4.68648	6.44294	4.21679	5.09288	5.4041	4.36621	4.14656	4.97241	3.06109	3.95885	4.57107	4.67487	5.01225	2.61583	5.56379	5.37472	6.07374
Chr1:22282651-22284300	1	22282651	22284300	NA	null					Not found	0	5.28888	6.29163	5.41338	5.05845	6.74147	6.21679	5.60745	3.14106	4.36621	4.43607	4.97241	4.06109	5.99127	5.52216	4.12233	5.86786	5.38137	7.53254	5.05279	7.4686
Chr1:22345201-22346250	1	22345201	22346250	NA	null					Not found	0	4.94785	4.87659	4.90437	5.76894	7.22882	5.80175	4.15999	5.9066	3.62924	5.14656	8.19083	8.09672	4.58688	4.47154	6.50084	7.02933	7.76964	4.13495	5.19029	5.84241
Chr1:22350451-22353300	1	22350451	22353300	NA	null					Not found	0	10.0744	10.1118	9.95881	9.94774	10.1189	10.2184	9.87299	9.89328	10.9572	9.71811	10.5068	10.1033	10.4168	10.1359	9.99351	10.1017	9.71807	9.3474	9.64075	9.98419
Chr1:22366051-22367100	1	22366051	22367100	NA	null					Not found	0	6.21088	4.67014	7.4036	4.84694	7.49185	6.38671	5.65476	5.98906	5.68813	5.36896	4.79553	4.73916	6.85697	5.41907	6.25983	5.94186	4.99434	7.5006	6.05279	7.44813
Chr1:22378351-22380600	1	22378351	22380600	NA	null					Not found	0	10.0633	10.4147	9.86926	9.75383	9.53916	9.85445	10.1722	9.87713	10.3435	10.3254	10.0599	9.80256	10.1196	10.1092	9.70127	9.93509	9.72853	9.37995	10.1275	10.1984
Chr1:22659301-22660200	1	22659301	22660200	NA	null					Not found	0	3.84831	4.13963	4.45186	2.18398	3.45943	4.31632	4.15999	3.98906	5.2922	1.97664	2.5939	0.739163	2.82135	4.24914	1.21544	3.2049	2.61583	3.24186	2.31582	4.64078
Chr1:22738651-22740000	1	22738651	22740000	NA	null					Not found	0	4.50039	4.42913	5.15812	5.3539	5.45943	5.8357	4.50792	4.4041	5.68813	4.29857	3.07932	6.02457	3.82135	4.24914	3.21544	4.2049	5.54183	3.24186	4.19029	5.22574
Chr1:22754401-22755750	1	22754401	22755750	NA	null					Not found	0	4.04096	3.29163	2.52586	5.29946	3.16992	3.86886	4.87049	3.62649	4.95117	2.97664	7.76382	4.73916	3.95885	1.66418	3.53736	2.61994	4.81747	4.89394	4.19029	4.31885
Chr1:22777351-22779450	1	22777351	22779450	NA	null					Not found	0	9.38081	9.72792	9.21515	9.05845	8.95128	9.17762	9.47864	9.62004	9.79916	9.09558	9.84751	9.01529	10.0521	9.61255	8.90543	9.38812	9.60905	9.12101	9.44854	9.60425
Chr1:23015551-23016750	1	23015551	23016750	NA	null					Not found	0	7.9236	4.87659	8.50771	8.64341	8.58871	7.06764	6.78803	7.5606	8.12109	5.62049	1.27197	5.54652	7.82135	5.24914	5.34472	9.01654	3.29391	8.42319	8.41736	8.39567
Chr1:23030551-23031750	1	23030551	23031750	NA	null					Not found	0	5.43327	3.29163	6.20393	5.29946	4.16993	5.10987	4.60745	4.72603	7.08867	3.29857	3.7314	3.54652	4.89174	4.66418	3.67487	5.52683	3.46383	7.10693	4.19029	7.04677
Chr1:23065801-23066850	1	23065801	23066850	NA	EPHB2-003	ENSP00000363761	EPH receptor B2 [Source:HGNC Symbol;Acc:3393]	+	CDS	overlapping	0	4.50039	5.36202	8.69578	8.90736	8.89482	6.29207	4.70056	4.51958	5.68813	3.5616	7.11746	1.73916	3.95885	3.47154	7.29225	3.78986	1.29391	3.75644	3.90079	5.90381
Chr1:23076001-23078250	1	23076001	23078250	NA	EPHB2-003	ENSP00000363761	EPH receptor B2 [Source:HGNC Symbol;Acc:3393]	+	CDS	overlapping	0	5.56452	5.61356	8.77757	8.76392	9.35755	8.69483	5.70056	8.47019	6.50371	5.5002	5.62952	9.27444	7.39424	5.70858	5.88786	9.80729	8.8408	5.24186	6.19029	7.36324
Chr1:23157601-23159700	1	23157601	23159700	NA	EPHB2-003	ENSP00000363761	EPH receptor B2 [Source:HGNC Symbol;Acc:3393]	+	CDS	overlapping	0	6.65567	5.61356	9.18407	9.23201	9.57932	8.12368	5.94849	8.44849	7.65899	6.0641	4.5199	7.4396	6.54381	4.75164	8.82646	8.7074	6.76964	6.2674	8.47233	7.34122
Chr1:23187901-23189400	1	23187901	23189400	NA	EPHB2-003	ENSP00000363761	EPH receptor B2 [Source:HGNC Symbol;Acc:3393]	+	CDS	overlapping	0	5.7414	5.05716	6.54378	5.12258	5.58496	6.38671	5.28553	4.62649	8.3204	4.88353	3.27197	5.32413	5.02298	4.47154	3.38536	6.29236	4.93776	5.56379	6.48575	6.36324
Chr1:23256451-23257500	1	23256451	23257500	NA	null					Not found	0	4.04096	1.9697	4.20393	2.59902	4.24793	4.31632	4.15999	3.98906	3.62924	4.14656	3.27197	2.32413	4.08438	3.66418	2.8004	3.61994	1.87887	4.52197	4.53822	5.56678
Chr1:23302051-23303850	1	23302051	23303850	NA	null					Not found	0	5.68481	5.42913	8.09267	7.81819	8.81057	8.89727	6.58321	6.3427	6.85163	5.83462	6.69823	7.07901	7.22734	4.83411	8.65006	7.79985	7.07526	6.2674	7.63775	5.71117
Chr1:23336851-23338050	1	23336851	23338050	NA	null					Not found	0	4.94785	4.42913	4.20393	6.88442	9	4.99439	5.28553	5.14106	4.36621	2.97664	5.22616	6.09672	3.30677	3.66418	8.4869	2.61994	5.3383	4.13495	0.730862	4.64078
Chr1:23345101-23347200	1	23345101	23347200	NA	KDM1A-001	ENSP00000349049	lysine (K)-specific demethylase 1A [Source:HGNC Symbol;Acc:29079]	+	CDS	overlapping	0	10.4525	10.7478	9.65926	9.87281	9.63118	9.61888	10.3134	9.58401	10.5541	10.4442	9.92122	9.11854	10.2307	10.3401	9.75071	9.68871	9.34919	9.56637	9.89577	10.316
Chr1:23434951-23436300	1	23434951	23436300	NA	null					Not found	0	4.94785	4.55466	5.06191	4.40637	4.90689	4.86886	5.70056	3.14106	5.90226	3.29857	1.27197	4.32413	4.40631	4.12361	3.91588	3.61994	4.46383	3.60443	3.53822	5.90381
Chr1:23514901-23516100	1	23514901	23516100	NA	HTR1D-001	ENSP00000363748	5-hydroxytryptamine (serotonin) receptor 1D [Source:HGNC Symbol;Acc:5289]	-	CDS	upstream	3479	4.94785	5.05716	7.25921	8.22107	9.36851	4.40943	4.401	5.06706	6.7167	3.29857	6.91582	7.13148	3.66934	3.47154	9.16672	7.15909	6.63376	3.60443	5.53822	6.01929
Chr1:23524501-23525700	1	23524501	23525700	NA	HTR1D-001	ENSP00000363748	5-hydroxytryptamine (serotonin) receptor 1D [Source:HGNC Symbol;Acc:5289]	-	CDS	downstream	3789	4.21088	4.9697	6.63019	8.47553	8.95128	7.10987	4.50792	4.81914	4.36621	2.97664	7.99307	8.95833	2.08438	2.24914	8.47753	7.09567	8.65585	3.75644	4.53822	4.77828
Chr1:23568601-23569650	1	23568601	23569650	NA	null					Not found	0	4.50039	3.9697	3.37385	2.18398	3.58496	1.99439	4.28553	0.819136	1.04428	4.14656	1.85693	2.32413	3.66934	2.98611	3.38536	2.2049	3.87887	2.01947	3.05279	5.01929
Chr1:23654851-23656050	1	23654851	23656050	NA	HNRNPR-002	ENSP00000363745	heterogeneous nuclear ribonucleoprotein R [Source:HGNC Symbol;Acc:5047]	-	CDS	overlapping	0	4.04096	4.87659	5.81864	4.05845	4.70044	4.86886	4.401	4.4041	5.04428	4.5616	4.79553	4.98709	3.66934	4.57107	4.02279	4.32038	5.04879	3.01947	4.81832	5.40631
Chr1:23703151-23704650	1	23703151	23704650	NA	TCEA3-001	ENSP00000406293	transcription elongation factor A (SII), 3 [Source:HGNC Symbol;Acc:11615]	-	CDS	upstream	3309	8.9297	7.9239	9.23735	9.27144	9.04439	9.19407	8.94849	8.76165	3.62924	9.07993	8.8756	8.52052	9.28078	8.57107	9.24334	9.16297	8.68622	7.57406	9.03007	7.27305
Chr1:23729101-23731200	1	23729101	23731200	NA	TCEA3-001	ENSP00000406293	transcription elongation factor A (SII), 3 [Source:HGNC Symbol;Acc:11615]	-	CDS	overlapping	0	8.76206	7.64213	9.00159	9.9232	9.92778	8.80175	8.59538	8.72	8.88348	8.41958	8.04015	9.18211	8.57624	7.4586	10.0483	8.93282	9.19779	8.31715	8.76429	8.11327
Chr1:23778001-23779350	1	23778001	23779350	NA	ASAP3-002	ENSP00000431715	ArfGAP with SH3 domain, ankyrin repeat and PH domain 3 [Source:HGNC Symbol;Acc:14987]	-	CDS	overlapping	0	5.79584	5.55466	6.59625	5.99133	6.44294	7.19079	6.74496	4.27857	6.68813	6.36896	5.27197	3.54652	6.78482	6.0565	5.53736	4.94186	3.75334	4.43451	6.15713	6.90381
Chr1:23809801-23811600	1	23809801	23811600	NA	ASAP3-002	ENSP00000431715	ArfGAP with SH3 domain, ankyrin repeat and PH domain 3 [Source:HGNC Symbol;Acc:14987]	-	CDS	overlapping	0	9.44184	9.78988	9.03365	7.73857	8.86419	8.90928	9.27799	8.56733	7.98679	8.87751	9.94969	7.52052	9.59745	8.71403	8.87365	9.4748	8.46883	8.42319	8.55104	9.74092
Chr1:23823151-23824500	1	23823151	23824500	NA	null					Not found	0	5.7414	6.77706	6.48933	5.3539	6.47573	6.81882	6.02249	4.27857	6.2142	4.97664	5.7314	5.98709	5.78482	7.03922	4.91588	6.29236	5.93776	6.97367	6.19029	7.01929
Chr1:23865901-23866950	1	23865901	23866950	NA	null					Not found	0	6.21088	6.9239	6.52586	6.43191	6.91886	6.36363	6.22412	6.81914	6.2922	5.88353	7.15461	5.4396	7.02298	6.15603	5.77003	5.90534	5.72017	6.16243	5.37472	7.01929
Chr1:23870701-23871900	1	23870701	23871900	NA	null					Not found	0	4.94785	7.05716	5.41338	3.40637	4.9542	6.16432	6.74496	6.10454	5.85163	6.14656	2.5939	3.90909	7.11413	5.79346	4.12233	3.2049	5.84849	6.41179	5.81833	6.74511
Chr1:23902651-23905350	1	23902651	23905350	NA	null					Not found	0	8.18051	8.67014	7.88341	6.7283	8.00562	9.13394	7.1763	8.09526	5.79916	7.57655	3.5939	9.81063	7.52179	7.09045	5.16963	8.05456	10.2797	7.93435	7.2066	8.85023
Chr1:23911801-23912700	1	23911801	23912700	NA	null					Not found	0	4.94785	6.05716	4.90437	4.05845	6.16993	4.80175	5.74496	6.46299	2.62924	5.83462	4.66429	7.75039	5.02298	4.36462	3.21544	5.01225	7.85615	5.68244	5.05279	6.07374
Chr1:23919301-23921250	1	23919301	23921250	NA	null					Not found	0	7.83537	8.30062	6.63019	7.44451	7.16993	7.16432	7.54605	5.3427	6.90226	6.78399	3.07932	7.64605	8.33862	7.9951	4.97032	7.29236	8.06209	8.26106	7.1059	7.1262
Chr1:23933251-23934450	1	23933251	23934450	NA	null					Not found	0	5.04096	6.80259	4.01128	2.92094	2.32193	4.21679	5.22412	2.81914	4.04428	5.0641	3.44189	4.06109	4.40631	5.0565	2.8004	2.2049	2.61583	5.64396	3.73086	6.44813
Chr1:23945101-23947050	1	23945101	23947050	NA	null					Not found	0	5.89894	7.37909	5.24832	5.12258	4.64386	4.40943	6.74496	6.06706	5.04428	5.29857	4.17886	4.64605	5.82135	5.91211	4.8004	4.86786	3.99434	6.54303	6.12318	5.48878
Chr1:23983651-23984700	1	23983651	23984700	NA	null					Not found	0	5.21088	3.9697	3.37385	2.59902	2.32193	0.40943	4.60745	0.819136	4.04428	1.97664	2.5939	3.73916	3.82135	3.24914	2.21544	2.2049	0.293905	4.01947	3.53822	4.1262
Chr1:23999701-24000450	1	23999701	24000450	NA	null					Not found	0	3.36288	0.969701	3.20393	2.18398	1.58496	0.40943	2.28553	3.62649	2.62924	1.97664	2.27197	2.32413	2.49942	2.24914	3.21544	0.619936	1.87887	3.24186	3.05279	4.31885
Chr1:24017701-24019650	1	24017701	24019650	NA	RPL11-001	ENSP00000363676	ribosomal protein L11 [Source:HGNC Symbol;Acc:10301]	+	CDS	overlapping	0	9.7925	9.99761	9.26732	9.4632	9.35094	9.18092	9.47864	9.41905	9.45367	9.71135	9.6856	9.36852	9.76386	9.32239	9.00334	9.06288	8.82918	9.40029	9.05279	9.72824
Chr1:24105901-24107250	1	24105901	24107250	NA	PITHD1-001	ENSP00000246151	PITH (C-terminal proteasome-interacting domain of thioredoxin-like) domain containing 1 [Source:HGNC Symbol;Acc:25022]	+	CDS	overlapping	0	5.99515	6.09898	7.29139	8.51788	8.5157	6.47552	6.34442	6.98906	6.13174	6.0641	6.29434	7.04294	6.11413	5.41907	7.45384	5.94186	7.50336	4.24186	6.28545	5.48878
Chr1:24150901-24152550	1	24150901	24152550	NA	HMGCL-002	ENSP00000363614	3-hydroxymethyl-3-methylglutaryl-CoA lyase [Source:HGNC Symbol;Acc:5005]	-	CDS	overlapping	0	9.73444	9.57333	9.3638	9.25007	9.12153	9.12368	9.401	8.99406	9.74818	9.76127	9.56659	9.17379	9.84372	9.72217	9.17544	9.11579	9.08507	9.21259	9.46218	10.1643
Chr1:24164551-24165300	1	24164551	24165300	NA	HMGCL-001	ENSP00000363611	3-hydroxymethyl-3-methylglutaryl-CoA lyase [Source:HGNC Symbol;Acc:5005]	-	CDS	overlapping	0	4.36288	5.21763	5.93185	3.59902	5.39232	5.49689	5.09288	4.14106	5.2142	5.43607	7.02686	4.54652	5.58688	5.24914	5.25983	4.52683	4.81747	5.60443	5.19029	5.77828
Chr1:24242851-24244050	1	24242851	24244050	NA	null					Not found	0	5.28888	6.21763	5.37385	3.76894	5.61471	6.21679	4.60745	3.14106	4.2142	2.5616	5.55737	5.38302	4.40631	4.36462	4.02279	4.52683	3.61583	6.62433	3.31582	7.01929
Chr1:24285001-24287400	1	24285001	24287400	NA	PNRC2-001	ENSP00000334840	proline-rich nuclear receptor coactivator 2 [Source:HGNC Symbol;Acc:23158]	+	CDS	downstream	548	10.9236	11.1194	10.4146	10.6214	10.268	10.5566	10.7367	10.3814	11.3366	10.8127	10.4802	10.4586	10.8992	10.9204	10.3511	10.4433	10.2008	10.2595	10.4941	11.1502
Chr1:24335551-24336750	1	24335551	24336750	NA	null					Not found	0	5.50039	5.82768	5.90437	6.29946	7.96	6.49689	5.78803	3.81914	4.85163	5.5002	5.88668	4.4396	5.30677	2.98611	6.81535	6.07937	6.93776	4.68244	3.90079	5.77828
Chr1:24372301-24374400	1	24372301	24374400	NA	null					Not found	0	7.10705	5.61356	9.56148	7.78884	8.98014	9.40378	6.78803	7.2454	4.74472	6.4029	8.19083	6.62181	7.60794	5.75164	9.01957	8.46543	7.27118	7.01947	8.17381	8.22574
Chr1:24396901-24398100	1	24396901	24398100	NA	MYOM3-001	ENSP00000363557	myomesin family, member 3 [Source:HGNC Symbol;Acc:26679]	-	CDS	overlapping	0	4.94785	4.67014	6.15812	3.59902	5.12928	4.80175	5.09288	3.14106	5.13174	3.78399	6.29434	3.32413	4.40631	3.83411	3.91588	4.61994	4.2008	5.75644	4.97879	6.31885
Chr1:24433801-24436500	1	24433801	24436500	NA	MYOM3-001	ENSP00000363557	myomesin family, member 3 [Source:HGNC Symbol;Acc:26679]	-	CDS	overlapping	0	5.84831	5.9697	8.01128	7.6543	9.64386	8.21033	5.82985	6.51958	5.04428	4.43607	7.52936	7.64605	5.78482	5.12361	7.79287	6.82939	6.7033	7.00436	6.31582	7.87344
Chr1:24443851-24444900	1	24443851	24444900	NA	IL22RA1-001	ENSP00000270800	interleukin 22 receptor, alpha 1 [Source:HGNC Symbol;Acc:13700]	-	CDS	upstream	2395	4.04096	4.29163	4.01128	2.59902	4.85798	4.40943	4.28553	3.62649	3.85163	3.97664	2.85693	4.32413	3.08438	4.24914	1.8004	2.61994	1.87887	4.43451	2.73086	5.31885
Chr1:24468901-24470400	1	24468901	24470400	NA	IL22RA1-001	ENSP00000270800	interleukin 22 receptor, alpha 1 [Source:HGNC Symbol;Acc:13700]	-	CDS	overlapping	0	5.7414	6.42913	7.89741	7.07475	7.63662	6.94859	5.74496	6.67712	5.04428	3.78399	7.6207	5.26273	5.82135	3.47154	7.09808	7.30644	4.99434	4.68244	6.01626	8.28463
Chr1:24475951-24477750	1	24475951	24477750	NA	null					Not found	0	5.36288	4.42913	6.63019	5.40637	8.40939	5.45382	6.12683	6.72603	5.13174	4.43607	8.39091	7.04294	5.40631	4.47154	6.69117	5.47792	5.15189	5.95807	4.73086	6.8107
Chr1:24501301-24502650	1	24501301	24502650	NA	IL28RA-001	ENSP00000327824	interleukin 28 receptor, alpha (interferon, lambda receptor) [Source:HGNC Symbol;Acc:18584]	-	CDS	overlapping	0	4.21088	4.87659	3.66336	2.92094	2.32193	2.99439	4.94849	3.4041	4.50371	3.29857	2.85693	3.54652	4.30677	2.24914	3.02279	2.2049	1.29391	3.75644	3.53822	4.31885
Chr1:24517951-24519900	1	24517951	24519900	NA	IL28RA-001	ENSP00000327824	interleukin 28 receptor, alpha (interferon, lambda receptor) [Source:HGNC Symbol;Acc:18584]	-	CDS	downstream	4213	4.84831	4.87659	5.72749	4.18398	7.55459	2.73136	5.55854	5.51958	5.36621	3.78399	8.44189	6.35387	4.89174	4.75164	5.60775	4.07937	3.75334	5.24186	3.90079	6.22574
Chr1:24562201-24563850	1	24562201	24563850	NA	null					Not found	0	4.36288	4.87659	8.05568	3.92094	6.50779	6.55918	5.70056	6.3427	4.2142	3.78399	5.44189	4.1986	4.66934	4.47154	6.94336	6.07937	4.2939	5.75644	4.19029	6.84241
Chr1:24592501-24593850	1	24592501	24593850	NA	null					Not found	0	4.50039	4.67014	5.56148	5.95657	6.85798	5.61888	4.94849	5.06706	4.2142	2.5616	5.44189	5.64605	3.30677	3.66418	4.53736	4.2049	4.93776	4.3414	0.730862	5.48878
Chr1:24616051-24617250	1	24616051	24617250	NA	null					Not found	0	7.04096	8.00312	6.56148	4.05845	6.78136	6.96402	6.22412	7.81914	6.2142	6.95392	7.8494	7.07901	6.30677	6.12361	6.2378	4.78986	7.65146	6.13495	5.37472	8.21367
Chr1:24643051-24644400	1	24643051	24644400	NA	GRHL3-005	ENSP00000354943	grainyhead-like 3 (Drosophila) [Source:HGNC Symbol;Acc:25839]	+	CDS	downstream	1642	5.68481	4.67014	4.78889	3.40637	3.58496	4.73136	4.50792	5.51958	4.62924	4.14656	4.35943	2.32413	4.19986	4.83411	3.38536	3.2049	3.46383	4.43451	3.90079	7.20149
Chr1:24701101-24702450	1	24701101	24702450	NA	C1orf201-203	ENSP00000394930	chromosome 1 open reading frame 201 [Source:HGNC Symbol;Acc:28070]	-	CDS	overlapping	0	4.94785	5.49326	6.2263	3.40637	4.32193	7.12368	5.401	4.27857	3.3662	4.67708	3.27197	3.73916	4.49942	4.47154	5.42489	5.52683	3.46383	4.43451	4.4313	5.84241
Chr1:24720001-24721200	1	24720001	24721200	NA	C1orf201-203	ENSP00000394930	chromosome 1 open reading frame 201 [Source:HGNC Symbol;Acc:28070]	-	CDS	overlapping	0	6.04096	8.05716	5.45186	5.05845	6.98869	5.40943	6.15999	3.98906	5.2142	4.97664	8.05333	4.73916	5.66934	6.09045	4.60775	4.32038	5.78576	8.25469	5.63775	7.24959
Chr1:24764101-24765000	1	24764101	24765000	NA	NIPAL3-007	ENSP00000363520	NIPA-like domain containing 3 [Source:HGNC Symbol;Acc:25233]	+	CDS	overlapping	0	5.12842	7.90044	5.20393	3.40637	2.80735	5.99439	5.82985	2.81914	5.2142	4.88353	8.69823	3.06109	6.11413	6.02173	2.21544	1.61994	4.2008	3.43451	4.97879	6.64078
Chr1:24788251-24789300	1	24788251	24789300	NA	NIPAL3-007	ENSP00000363520	NIPA-like domain containing 3 [Source:HGNC Symbol;Acc:25233]	+	CDS	overlapping	0	3.84831	3.9697	4.78889	2.18398	4.16993	3.86886	3.28553	3.14106	4.62924	3.29857	4.97241	4.4396	4.30677	3.66418	2.53736	4.07937	4.93776	4.13495	3.05279	5.22574
Chr1:24841651-24842850	1	24841651	24842850	NA	RCAN3-001	ENSP00000363516	RCAN family member 3 [Source:HGNC Symbol;Acc:3042]	+	CDS	overlapping	0	5.36288	4.13963	7.64687	6.92095	8.09803	5.61888	6.19242	3.81914	4.74472	5.22457	7.04015	3.54652	4.95885	5.41907	7.36518	6.50258	5.2008	3.01947	3.73086	4.31885
Chr1:24862201-24863700	1	24862201	24863700	NA	RCAN3-001	ENSP00000363516	RCAN family member 3 [Source:HGNC Symbol;Acc:3042]	+	CDS	upstream	434	4.62592	5.42913	5.01128	7.52975	5.42626	4.80175	5.65476	3.62649	4.2142	5.5616	4.66429	3.06109	5.40631	5.47154	4.38536	4.7074	3.10126	4.52197	3.90079	5.84241
Chr1:24867151-24868950	1	24867151	24868950	NA	null					Not found	0	6.36288	6.69762	5.37385	5.88442	6.47573	5.49689	6.82985	4.27857	5.36621	4.88353	8.18486	3.90909	6.3574	6.30804	3.8004	4.7074	4.10126	5.82683	5.12318	6.99128
Chr1:25003951-25005750	1	25003951	25005750	NA	null					Not found	0	6.12842	4.87659	6.45186	4.40637	5.55459	5.26741	5.82985	5.9066	4.62924	5.43607	5.55737	6.09672	4.40631	5.0565	4.91588	4.94186	4.61583	4.24186	5.48575	4.77828
Chr1:25009651-25011150	1	25009651	25011150	NA	null					Not found	0	5.89894	5.13963	8.37885	6.80847	8.8392	5.36363	5.78803	6.2454	4.50371	7.04273	9.34878	8.57837	5.40631	2.66418	9.33956	8.47792	8.21872	5.29249	7.28545	6.22574
Chr1:25041151-25042350	1	25041151	25042350	NA	null					Not found	0	8.38081	9.6027	7.78889	6.48166	5.16993	9.05329	8.75041	8.26208	4.95117	9.39027	9.72524	6.49405	8.83481	8.30804	8.65423	6.2049	5.96633	6.2674	9.15293	8.0331
Chr1:25050751-25052250	1	25050751	25052250	NA	null					Not found	0	5.99515	5.67014	7.99834	8.39992	7.01123	7.75816	6.28553	4.72603	5.13174	5.29857	9.22034	10.0153	6.45362	5.30804	5.3029	7.06288	9.83887	7.91024	5.58884	6.96271
Chr1:25281301-25282200	1	25281301	25282200	NA	RUNX3-002	ENSP00000343477	runt-related transcription factor 3 [Source:HGNC Symbol;Acc:10473]	-	CDS	overlapping	0	4.50039	3.29163	4.59625	3.18398	5	0.40943	4.87049	2.4041	3.85163	2.5616	7.84182	4.82663	4.58688	0.664182	4.21544	4.07937	3.61583	2.75644	3.05279	5.96271
Chr1:25292551-25293900	1	25292551	25293900	NA	RUNX3-002	ENSP00000343477	runt-related transcription factor 3 [Source:HGNC Symbol;Acc:10473]	-	CDS	downstream	1489	5.62592	5.67014	5.48933	3.76894	6.35755	5.05329	6.05812	5.72603	4.50371	3.78399	6.61182	3.32413	3.95885	4.36462	4.60775	5.2049	0.293905	5.3414	3.73086	5.40631
Chr1:25348801-25350150	1	25348801	25350150	NA	null					Not found	0	9.28413	9.29613	9.07429	8.83264	9.46761	6.88516	9.19242	8.17669	4.36621	8.76454	9.8995	7.41159	7.59745	8.07357	9.01634	9.10778	7.82529	9.03442	7.94032	9.37955
Chr1:25417201-25418400	1	25417201	25418400	NA	null					Not found	0	5.43327	4.42913	7.99183	7.31326	8.35755	6.67622	6.34442	9.2454	4.74472	3.5616	4.85693	0.739163	5.02298	4.75164	8.75847	6.01225	1.87887	6.3887	7.51222	6.6764
Chr1:25427251-25428600	1	25427251	25428600	NA	null					Not found	0	1.04096	5.55466	5.69578	3.92094	6.74147	5.16432	5.15999	4.9066	3.85163	5.43607	6.24925	0.739163	4.49942	5.57107	4.739	4.07937	3.46383	5.60443	4.53822	6.93356
Chr1:25493551-25495350	1	25493551	25495350	NA	null					Not found	0	7.94785	9.35772	8.53484	8.32012	7.50779	8.21679	9.05812	3.98906	4.74472	8.63485	7.88668	0.739163	7.11413	7.3921	5.25983	7.61994	1.87887	5.07836	8.64375	8.40631
Chr1:25558051-25560300	1	25558051	25560300	NA	SYF2-001	ENSP00000236273	SYF2 homolog, RNA splicing factor (S. cerevisiae) [Source:HGNC Symbol;Acc:19824]	-	CDS	overlapping	0	9.85794	9.84928	9.79077	9.77144	9.46964	9.92513	9.78537	9.80213	10.0968	10.0878	9.87188	9.57837	9.86136	9.76747	9.6396	9.43372	9.26832	9.04184	9.75877	9.74512
Chr1:25565701-25567500	1	25565701	25567500	NA	C1orf63-001	ENSP00000243189	chromosome 1 open reading frame 63 [Source:HGNC Symbol;Acc:25234]	-	CDS	upstream	1580	8.37187	6.64213	8.09267	9.39018	8.3837	8.47013	9.16409	8.81349	9.83218	7.98787	9.15155	8.57837	9.29383	9.0522	9.09502	8.60862	8.72436	5.79206	9.23071	8.18921
Chr1:25572151-25574850	1	25572151	25574850	NA	C1orf63-001	ENSP00000243189	chromosome 1 open reading frame 63 [Source:HGNC Symbol;Acc:25234]	-	CDS	overlapping	0	10.2033	10.4656	9.91989	9.90736	9.62571	9.90928	10.1247	9.9066	10.2464	10.234	10.423	9.69627	10.1665	10.1236	9.95015	10.1038	9.78976	9.15561	10.0818	10.0637
Chr1:25664551-25665900	1	25664551	25665900	NA	TMEM50A-001	ENSP00000363478	transmembrane protein 50A [Source:HGNC Symbol;Acc:30590]	+	CDS	downstream	1078	9.71338	9.58809	9.24285	9.37051	8.8392	9.40095	9.46875	9.22002	9.83544	9.5158	9.48871	9.42916	9.44193	9.5128	9.09195	9.28882	9.46633	8.14876	9.54464	9.34676
Chr1:25670101-25671150	1	25670101	25671150	NA	TMEM50A-001	ENSP00000363478	transmembrane protein 50A [Source:HGNC Symbol;Acc:30590]	+	CDS	overlapping	0	5.68481	4.42913	7.20393	5.64341	5.20945	5.93299	4.15999	5.06706	3.62924	5.29857	3.85693	7.60953	6.49942	5.41907	5.34472	5.61994	7.99434	3.60443	5.63775	5.90381
Chr1:25687351-25688400	1	25687351	25688400	NA	TMEM50A-001	ENSP00000363478	transmembrane protein 50A [Source:HGNC Symbol;Acc:30590]	+	CDS	upstream	155	4.21088	4.77706	5.24832	5.05845	6.49185	5.76698	4.70056	4.27857	2.62924	3.78399	5.12995	7.54652	4.08438	2.98611	5.8004	2.61994	8.28826	2.43451	3.53822	5.84241
Chr1:25756051-25758000	1	25756051	25758000	NA	TMEM57-001	ENSP00000363463	transmembrane protein 57 [Source:HGNC Symbol;Acc:25572]	+	CDS	overlapping	0	9.69917	10.0677	9.48238	9.21004	9.45533	9.56678	9.64014	9.89862	10.8835	10.4422	10.315	9.16123	9.75681	10.05	9.3161	9.85595	9.23642	9.08197	8.82889	9.87727
Chr1:25768351-25769400	1	25768351	25769400	NA	TMEM57-001	ENSP00000363463	transmembrane protein 57 [Source:HGNC Symbol;Acc:25572]	+	CDS	overlapping	0	4.62592	4.55466	4.78889	3.92094	4.64386	3.86886	4.401	4.14106	3.3662	4.5616	1.85693	3.06109	2.49942	4.24914	2.8004	2.94186	3.46383	3.60443	2.73086	5.01929
Chr1:25830001-25831050	1	25830001	25831050	NA	null					Not found	0	4.50039	4.87659	5.72749	3.92094	4	4.31632	5.55854	2.4041	5.50371	4.67708	3.07932	3.32413	4.19986	4.75164	3.38536	4.52683	4.10126	4.43451	4.4313	5.22574
Chr1:25875451-25877700	1	25875451	25877700	NA	LDLRAP1-001	ENSP00000363458	low density lipoprotein receptor adaptor protein 1 [Source:HGNC Symbol;Acc:18640]	+	CDS	overlapping	0	6.28888	6.52429	7.59625	8.75383	9.19476	6.86886	6.53345	4.51958	5.2142	5.88353	8.91582	9.74198	6.49942	5.79346	8.54635	5.82939	9.2769	6.87745	6.40329	7.91876
Chr1:25893751-25896900	1	25893751	25896900	NA	LDLRAP1-001	ENSP00000363458	low density lipoprotein receptor adaptor protein 1 [Source:HGNC Symbol;Acc:18640]	+	CDS	upstream	268	9.12842	10.7511	9.95881	10.6638	10.2715	8.27979	9.39405	9.50564	10.1131	9.64197	10.5223	10.1717	10.0598	10.0967	10.3575	9.26739	10.2854	7.13495	8.71955	9.29039
Chr1:25942201-25943400	1	25942201	25943400	NA	MAN1C1-001	ENSP00000363452	mannosidase, alpha, class 1C, member 1 [Source:HGNC Symbol;Acc:19080]	+	CDS	downstream	889	8.17024	8.8089	7.91129	7.69705	7.74819	7.59926	7.49498	7.04796	9.44942	8.16646	8.77579	6.57205	8.60271	7.75164	8.0858	8.24199	7.08832	7.00436	8.17381	8.77006
Chr1:26034451-26035500	1	26034451	26035500	NA	MAN1C1-001	ENSP00000363452	mannosidase, alpha, class 1C, member 1 [Source:HGNC Symbol;Acc:19080]	+	CDS	overlapping	0	6.7414	5.13963	8.81126	9.06254	8.50779	5.96402	7.25515	7.17669	5.95117	8.12639	8.8793	7.39737	7.30677	7.20334	9.18698	8.52683	8.25969	6.43451	9.65567	8.35227
Chr1:26112901-26114550	1	26112901	26114550	NA	MAN1C1-001	ENSP00000363452	mannosidase, alpha, class 1C, member 1 [Source:HGNC Symbol;Acc:19080]	+	CDS	upstream	2621	5.56452	5.61356	7.69578	6.3539	7.36632	5.76698	5.74496	5.67712	6.90226	6.80953	7.35943	4.64605	5.66934	4.83411	6.72323	7.29236	5.93776	4.75644	6.51222	7.17683
Chr1:26122801-26124150	1	26122801	26124150	NA	SEPN1-001	ENSP00000355141	selenoprotein N, 1 [Source:HGNC Symbol;Acc:15999]	+	CDS	downstream	2572	6.17024	7.52429	6.57897	6.12258	5.42626	4.65736	5.98597	4.98906	7.19402	6.59135	6.91582	4.90909	7.64917	6.02173	6.25983	6.07937	5.15189	6.04922	7.05279	7.82664
Chr1:26323351-26325600	1	26323351	26325600	NA	null					Not found	0	9.53281	9.97533	8.87988	8.95216	8.42626	8.62375	9.52393	8.60704	9.93606	9.71135	9.35412	8.72785	10.0052	9.52837	9.17544	8.6423	8.6382	8.75644	9.60738	9.72399
Chr1:26361301-26363700	1	26361301	26363700	NA	EXTL1-001	ENSP00000363398	exostoses (multiple)-like 1 [Source:HGNC Symbol;Acc:3515]	+	CDS	overlapping	0	8.1907	9.94124	7.63856	7.50591	7.97728	6.61888	8.87549	8.27857	8.84518	9.35602	10.1789	6.23102	7.61836	7.98611	7.88786	7.56245	6.78576	7.36525	6.88061	7.96271
Chr1:26431051-26432100	1	26431051	26432100	NA	null					Not found	0	5.12842	5.13963	4.52586	0.599017	5.16993	2.40943	3.50792	3.81914	5.13174	3.97664	3.5939	4.1986	4.95885	3.66418	4.739	4.07937	2.29391	5.13495	4.19029	5.90381
Chr1:26436751-26439300	1	26436751	26439300	NA	PDIK1L-003	ENSP00000406510	PDLIM1 interacting kinase 1 like [Source:HGNC Symbol;Acc:18981]	+	CDS	downstream	1500	10.663	10.9297	9.96714	10.0848	9.82337	9.80604	10.4165	10.4467	10.9177	10.758	10.5376	9.30141	10.5588	10.5816	9.83749	10.3342	9.48373	9.65851	9.95245	10.724
Chr1:26449201-26450700	1	26449201	26450700	NA	PDIK1L-001	ENSP00000363389	PDLIM1 interacting kinase 1 like [Source:HGNC Symbol;Acc:18981]	+	CDS	upstream	133	3.62592	4.42913	4.90437	8.20635	7.91289	4.49689	3.70056	4.27857	4.36621	1.97664	0.271968	4.82663	4.30677	3.83411	7.07342	2.2049	5.46383	2.75644	3.31582	5.40631
Chr1:26471101-26472300	1	26471101	26472300	NA	null					Not found	0	3.84831	3.77706	2.78889	2.59902	5.04439	2.40943	4.02249	3.62649	3.62924	0.976638	3.27197	3.54652	4.95885	3.83411	3.53736	3.78986	1.87887	4.89394	3.73086	5.48878
Chr1:26482501-26483850	1	26482501	26483850	NA	GRRP1-001	ENSP00000363386	glycine/arginine rich protein 1 [Source:HGNC Symbol;Acc:25860]	+	CDS	downstream	3933	5.68481	6.17915	5.33321	6.05845	5.32193	2.99439	5.15999	4.14106	5.68813	6.02103	4.7314	1.73916	8.47096	5.61838	4.3029	2.94186	1.87887	7.5006	3.73086	7.42737
Chr1:26494801-26497500	1	26494801	26497500	NA	ZNF593-001	ENSP00000363384	zinc finger protein 593 [Source:HGNC Symbol;Acc:30943]	+	CDS	overlapping	0	9.25041	9.8089	8.68371	8.28552	8.80413	8.76258	8.99977	9.58401	9.37967	8.79682	9.82271	7.8581	9.4881	9.08625	8.69925	9.07115	8.14565	9.02322	8.63173	9.60425
Chr1:26503201-26504850	1	26503201	26504850	NA	CNKSR1-001	ENSP00000354609	connector enhancer of kinase suppressor of Ras 1 [Source:HGNC Symbol;Acc:19700]	+	CDS	overlapping	0	5.04096	5.29163	5.01128	1.59902	3.90689	4.86886	5.45545	3.14106	4.85163	4.78399	5.35943	4.1986	5.08438	4.57107	2.21544	2.94186	2.29391	4.75644	4.4313	6.31885
Chr1:26559901-26562150	1	26559901	26562150	NA	CEP85-001	ENSP00000432354	centrosomal protein 85kDa [Source:HGNC Symbol;Acc:25309]	+	CDS	downstream	4125	9.58785	9.88259	9.41338	9.75889	9.48583	9.57182	9.52711	9.19851	10.5757	9.72147	9.91221	8.71071	9.81003	9.61255	9.40279	9.56538	8.67761	9.03442	8.82889	9.65424
Chr1:26563651-26564700	1	26563651	26564700	NA	CEP85-001	ENSP00000432354	centrosomal protein 85kDa [Source:HGNC Symbol;Acc:25309]	+	CDS	downstream	1575	1.04096	5.77706	6.81864	8.55321	7.97154	5.69483	4.70056	5.57402	6.2142	3.78399	2.5939	3.90909	5.78482	4.47154	7.80789	2.2049	6.89382	4.13495	4.90079	5.84241
Chr1:26601751-26603550	1	26601751	26603550	NA	CEP85-001	ENSP00000432354	centrosomal protein 85kDa [Source:HGNC Symbol;Acc:25309]	+	CDS	overlapping	0	7.67031	7.19852	9.41582	8.19893	9.13699	9.01676	7.37299	8.2454	6.25373	7.26204	9.73549	9.61261	8.16475	6.3921	9.34986	8.93282	9.69478	7.71063	9.69086	8.17683
Chr1:26632351-26633850	1	26632351	26633850	NA	UBXN11-003	ENSP00000324721	UBX domain protein 11 [Source:HGNC Symbol;Acc:30600]	-	CDS	downstream	2977	7.79584	8.38755	8.63856	7.79869	8.11894	9.07477	7.91002	8.25376	9.41932	7.10592	9.01006	8.15702	8.44193	7.21877	8.29225	8.5208	7.76151	8.04184	7.31582	8.44813
Chr1:26647651-26648700	1	26647651	26648700	NA	AIM1L-001	ENSP00000433931	absent in melanoma 1-like [Source:HGNC Symbol;Acc:17295]	-	CDS	overlapping	0	5.7414	5.67014	6.39375	4.50591	5.90689	4.86886	5.22412	5.21145	5.68813	5.93083	6.27197	6.46708	6.58688	5.12361	5.739	5.66433	6.78576	5.92636	6.90079	7.36324
Chr1:26662351-26664000	1	26662351	26664000	NA	AIM1L-001	ENSP00000433931	absent in melanoma 1-like [Source:HGNC Symbol;Acc:17295]	-	CDS	overlapping	0	3.62592	5.05716	6.57897	5.55321	6.83289	5.69483	4.50792	8.41159	6.65899	3.78399	7.50079	5.13148	5.92568	4.91211	6.9569	5.66433	4.2008	4.95807	4.81832	6.8107
Chr1:26704051-26705550	1	26704051	26705550	NA	ZNF683-003	ENSP00000411289	zinc finger protein 683 [Source:HGNC Symbol;Acc:28495]	-	CDS	downstream	3270	1.04096	4.13963	7.08657	5.92095	8.15482	6.4318	4.28553	7.41905	5.36621	4.5616	7.78767	8.05205	2.82135	3.83411	8.54635	6.68603	7.7033	5.9891	4.4313	5.1262
Chr1:26713501-26714850	1	26713501	26714850	NA	null					Not found	0	4.21088	4.55466	7.32287	4.40637	6.45943	4.21679	3.50792	4.81914	5.74472	3.5616	5.66429	3.54652	3.66934	3.24914	6.09808	5.1435	4.2939	2.75644	3.31582	4.1262
Chr1:26734801-26736450	1	26734801	26736450	NA	LIN28A-001	ENSP00000363314	lin-28 homolog A (C. elegans) [Source:HGNC Symbol;Acc:15986]	+	CDS	downstream	933	5.28888	2.55466	4.78889	5.05845	5.9542	1.99439	5.02249	3.62649	5.2142	5.0641	7.30539	3.54652	5.3574	5.12361	3.91588	4.07937	2.29391	7.95021	3.05279	5.22574
Chr1:26743201-26744250	1	26743201	26744250	NA	LIN28A-001	ENSP00000363314	lin-28 homolog A (C. elegans) [Source:HGNC Symbol;Acc:15986]	+	CDS	overlapping	0	3.36288	2.55466	3.52586	2.18398	4.16993	3.86886	4.50792	3.4041	5.62924	4.14656	2.85693	2.32413	4.19986	3.98611	1.21544	3.42729	1.87887	4.43451	3.53822	5.84241
Chr1:26757901-26759700	1	26757901	26759700	NA	DHDDS-002	ENSP00000403529	dehydrodolichyl diphosphate synthase [Source:HGNC Symbol;Acc:20603]	+	CDS	overlapping	0	9.10165	9.16446	8.53932	8.3672	8.43045	8.48089	8.69492	8.79642	9.86764	8.97664	9.21741	8.41864	9.35117	9.27151	8.47753	8.05456	8.0948	8.54303	8.75323	9.09364
Chr1:26826151-26828400	1	26826151	26828400	NA	null					Not found	0	10.0962	10.5262	9.81126	9.66511	9.80896	8.96785	9.54291	9.33484	10.6899	9.77105	10.4899	9.46708	10.1086	9.79604	9.96531	10.0835	9.35999	9.66573	9.63173	10.3273
Chr1:26928601-26929650	1	26928601	26929650	NA	null					Not found	0	4.94785	5.9697	5.11082	3.59902	3.80735	3.73136	4.78803	4.51958	5.90226	4.14656	2.27197	2.32413	6.17184	4.75164	3.91588	1.61994	3.99434	5.07836	4.81832	6.74511
Chr1:26946001-26948700	1	26946001	26948700	NA	null					Not found	0	10.8817	11.1852	10.5382	10.7576	10.2831	10.6821	10.7395	10.313	11.3469	10.3966	10.595	10.5752	11.0674	10.8241	10.4003	10.6739	10.4601	10.4527	10.8236	11.0451
Chr1:27003601-27004800	1	27003601	27004800	NA	null					Not found	0	5.28888	5.36202	6.24832	5.95657	5.78136	5.49689	5.15999	4.27857	4.95117	4.78399	5.07932	5.38302	5.25431	4.36462	4.67487	3.61994	5.2008	4.3414	5.19029	6.44813
Chr1:27031801-27033150	1	27031801	27033150	NA	ARID1A-001	ENSP00000320485	AT rich interactive domain 1A (SWI-like) [Source:HGNC Symbol;Acc:11110]	+	CDS	overlapping	0	4.94785	6.29163	5.95882	6.15361	5.72792	7.68555	5.87049	5.27857	5.50371	5.29857	4.97241	7.99655	5.95885	4.36462	4.46336	3.94186	7.82529	4.52197	5.31582	6.60425
Chr1:27070201-27071400	1	27070201	27071400	NA	ARID1A-001	ENSP00000320485	AT rich interactive domain 1A (SWI-like) [Source:HGNC Symbol;Acc:11110]	+	CDS	overlapping	0	4.36288	5.77706	7.82598	7.34048	6.53916	6.99439	6.78803	4.51958	5.2142	5.36896	4.7314	8.39021	8.06927	7.54682	6.7546	7.44012	8.03537	8.65368	8.60738	7.79458
Chr1:27097651-27099900	1	27097651	27099900	NA	ARID1A-001	ENSP00000320485	AT rich interactive domain 1A (SWI-like) [Source:HGNC Symbol;Acc:11110]	+	CDS	overlapping	0	6.46722	6.42913	7.90437	7.51788	7.58496	8.46471	6.28553	8.5606	6.43659	6.10592	7.31636	9.92652	6.8032	5.94958	6.88786	6.78986	8.62033	5.64396	6.77526	6.56678
Chr1:27125701-27127500	1	27125701	27127500	NA	PIGV-001	ENSP00000078527	phosphatidylinositol glycan anchor biosynthesis, class V [Source:HGNC Symbol;Acc:26031]	+	CDS	upstream	1366	8.23078	6.21763	9.0145	8.05023	7.76155	9.20059	7.32992	7.86353	8.2341	6.97664	4.35943	6.86845	9.07685	7.30804	6.9569	7.51475	6.57931	5.89394	7.27002	8.18921
Chr1:27175051-27176850	1	27175051	27176850	NA	ZDHHC18-001	ENSP00000363257	zinc finger, DHHC-type containing 18 [Source:HGNC Symbol;Acc:20712]	+	CDS	overlapping	0	7.416	6.2551	9.5236	10.0502	9.84549	8.67153	6.6313	9.71092	5.62924	6.43607	7.2832	8.60335	6.95885	4.83411	9.34472	9.22727	8.24227	6.10693	7.87041	7.87344
Chr1:27198451-27199650	1	27198451	27199650	NA	null					Not found	0	4.36288	5.36202	5.72749	2.59902	4.85798	5.26741	3.87049	4.72603	4.74472	3.97664	3.07932	3.54652	4.89174	4.75164	5.70729	4.07937	2.61583	3.43451	4.19029	5.77828
Chr1:27215701-27217650	1	27215701	27217650	NA	GPN2-001	ENSP00000363250	GPN-loop GTPase 2 [Source:HGNC Symbol;Acc:25513]	-	CDS	overlapping	0	9.57234	9.61356	9.58331	9.3738	9.07948	9.58436	9.6224	9.7675	10.0358	9.5691	9.85317	9.1142	9.59218	9.31164	9.36009	9.5683	9.14877	8.87745	9.67338	9.57624
Chr1:27225901-27227700	1	27225901	27227700	NA	GPATCH3-001	ENSP00000354645	G patch domain containing 3 [Source:HGNC Symbol;Acc:25720]	-	CDS	overlapping	0	9.28413	9.6562	9.24832	9.1304	8.81378	8.82306	9.33356	9.09526	9.65899	9.36034	9.00668	8.80525	9.48241	9.19166	8.85568	8.64784	8.64705	8.45688	9.18207	9.77418
Chr1:27233551-27234900	1	27233551	27234900	NA	NUDC-003	ENSP00000404020	nuclear distribution gene C homolog (A. nidulans) [Source:HGNC Symbol;Acc:8045]	+	CDS	downstream	2734	4.7414	3.55466	7.3638	4.18398	6.84549	6.02414	4.94849	5.57402	5.62924	3.78399	6.82656	6.46708	5.02298	3.24914	3.38536	5.52683	4.10126	4.75644	4.73086	6.31885
Chr1:27293101-27294150	1	27293101	27294150	NA	null					Not found	0	3.84831	5.61356	4.52586	2.92094	4.52356	4.10987	4.401	2.4041	4.85163	3.78399	4.97241	4.73916	3.49942	3.47154	2.53736	4.2049	4.54183	4.95807	4.97879	4.48878
Chr1:27316651-27318900	1	27316651	27318900	NA	TRNP1-001	ENSP00000429216	TMF1-regulated nuclear protein 1 [Source:HGNC Symbol;Acc:34348]	+	CDS	downstream	1378	4.94785	4.77706	5.33321	4.84694	6.70044	5.80175	5.94849	5.3427	4.2142	4.67708	5.48142	8.99655	4.82135	5.47154	4.85929	4.78986	6.75334	4.89394	4.63775	5.64078
Chr1:27357301-27358950	1	27357301	27358950	NA	null					Not found	0	7.4839	7.29163	7.54378	7.4192	8.26209	7.40943	7.95795	7.38899	7.56784	7.62049	9.2804	7.82663	8.01512	6.73027	7.61632	7.98626	7.75334	5.68244	8.67338	7.07374
Chr1:27400351-27401400	1	27400351	27401400	NA	null					Not found	0	4.21088	3.77706	5.20393	2.18398	6.08746	3.73136	5.94849	3.14106	6.2142	3.78399	6.98621	5.06109	5.25431	3.66418	5.07342	3.2049	4.93776	4.68244	4.4313	6.74511
Chr1:27431701-27432750	1	27431701	27432750	NA	SLC9A1-001	ENSP00000263980	solute carrier family 9 (sodium/hydrogen exchanger), member 1 [Source:HGNC Symbol;Acc:11071]	-	CDS	overlapping	0	5.04096	5.42913	6.80384	6.70754	6.6865	4.99439	5.15999	6.9066	5.74472	4.14656	4.97241	4.82663	5.25431	5.30804	4.91588	6.01225	5.84849	3.75644	4.63775	6.01929
Chr1:27437701-27439500	1	27437701	27439500	NA	SLC9A1-001	ENSP00000263980	solute carrier family 9 (sodium/hydrogen exchanger), member 1 [Source:HGNC Symbol;Acc:11071]	-	CDS	overlapping	0	8.57234	5.72459	8.4847	9.60745	8.62936	8.13735	7.85031	9.44119	5.62924	5.97664	8.96546	9.51395	9.10305	6.59492	8.32396	8.74406	9.58392	7.5006	8.55104	7.58564
Chr1:27448651-27449850	1	27448651	27449850	NA	SLC9A1-001	ENSP00000263980	solute carrier family 9 (sodium/hydrogen exchanger), member 1 [Source:HGNC Symbol;Acc:11071]	-	CDS	overlapping	0	7.04096	4.67014	8.06811	7.73857	7.11894	8.01676	5.65476	6.17669	5.50371	5.93083	7.76382	7.68168	8.28078	4.83411	6.28153	6.59722	8.64705	6.68244	7.51222	7.07374
Chr1:27480301-27482550	1	27480301	27482550	NA	SLC9A1-001	ENSP00000263980	solute carrier family 9 (sodium/hydrogen exchanger), member 1 [Source:HGNC Symbol;Acc:11071]	-	CDS	overlapping	0	9.00674	9.28258	8.82964	9.18022	8.87958	9.14414	9.1763	9.81349	9.55207	8.30756	9.7477	9.50735	9.78713	9.19166	8.66665	8.24929	9.23348	8.38288	8.47905	9.65424
Chr1:27518101-27520200	1	27518101	27520200	NA	null					Not found	0	4.84831	4.42913	5.24832	2.92094	7.07682	4.31632	4.60745	5.94842	4.2142	4.14656	4.66429	5.98709	4.95885	4.47154	3.02279	4.07937	5.65146	4.60443	4.81832	5.71117
Chr1:27559951-27562350	1	27559951	27562350	NA	null					Not found	0	9.13371	8.99761	9.00159	8.1304	8.56224	9.02414	9.29675	8.61355	9.55998	8.62049	9.76782	8.05205	9.4881	9.0565	8.53285	9.12376	8.74512	8.52727	8.81833	9.1706
Chr1:27618451-27619200	1	27618451	27619200	NA	WDTC1-001	ENSP00000355317	WD and tetratricopeptide repeats 1 [Source:HGNC Symbol;Acc:29175]	+	CDS	overlapping	0	3.36288	4.42913	5.29139	2.59902	3	3.21679	3.50792	0.819136	4.36621	2.5616	2.5939	4.06109	2.08438	3.98611	2.21544	3.42729	3.10126	2.01947	2.73086	4.31885
Chr1:27647851-27650100	1	27647851	27650100	NA	TMEM222-001	ENSP00000363189	transmembrane protein 222 [Source:HGNC Symbol;Acc:25363]	+	CDS	overlapping	0	9.50856	9.82145	9.24559	9.05845	8.90087	9.21033	9.38004	9.6103	10.0358	9.63127	9.55274	9.00595	9.60533	9.64718	9.30819	9.43051	9.09804	8.59942	9.23469	9.71546
Chr1:27673351-27674850	1	27673351	27674850	NA	SYTL1-001	ENSP00000316464	synaptotagmin-like 1 [Source:HGNC Symbol;Acc:15584]	+	CDS	overlapping	0	5.43327	5.36202	5.45186	3.92094	6.30378	4.80175	4.60745	4.51958	5.85163	4.14656	4.5199	4.1986	4.66934	4.91211	5.07342	5.57413	3.29391	5.4789	5.12318	6.44813
Chr1:27717601-27720150	1	27717601	27720150	NA	GPR3-001	ENSP00000363136	G protein-coupled receptor 3 [Source:HGNC Symbol;Acc:4484]	+	CDS	downstream	153	8.85474	9.27804	9.39375	9.42238	9.45327	9.57182	9.08858	9.62649	10.3227	9.09558	10.2592	8.4045	10.0768	9.32952	9.22946	9.5208	7.88636	8.65851	8.16549	9.7493
Chr1:27814951-27817800	1	27814951	27817800	NA	null					Not found	0	10.6089	10.4434	10.2305	10.6393	10.1984	10.2813	10.0515	9.98153	10.4062	9.82213	10.4899	10.112	10.9194	10.3767	10.1855	10.1435	10.2611	9.84814	10.046	10.5809
Chr1:27844351-27845850	1	27844351	27845850	NA	null					Not found	0	8.45881	5.82768	6.77378	8.73344	7.37504	8.19733	7.91973	6.06706	9.03296	7.80953	4.5199	2.73916	9.4767	8.27151	5.57299	6.55067	5.90861	7.58426	7.12318	7.69389
Chr1:27868201-27870300	1	27868201	27870300	NA	AHDC1-001	ENSP00000247087	AT hook, DNA binding motif, containing 1 [Source:HGNC Symbol;Acc:25230]	-	CDS	upstream	3515	7.36288	6.75106	9.06191	9.87979	9.82337	9.33424	7.04041	6.46299	8.59887	6.758	8.12372	9.24696	8.69909	7.0565	8.85206	9.49645	9.32733	8.00436	6.31582	7.77828
Chr1:27889801-27891450	1	27889801	27891450	NA	null					Not found	0	7.12842	5.42913	8.93185	9.2608	8.13955	9.54642	7.30048	6.37372	10.0777	7.60599	8.96546	7.07901	8.83034	8.24914	4.38536	8.34786	8.53708	7.04922	6.68506	8.75348
Chr1:27934801-27936000	1	27934801	27936000	NA	FGR-001	ENSP00000363117	Gardner-Rasheed feline sarcoma viral (v-fgr) oncogene homolog [Source:HGNC Symbol;Acc:3697]	-	CDS	upstream	3425	5.21088	4.77706	5.33321	4.68648	4.90689	4.65736	4.87049	4.4041	5.79916	3.29857	3.44189	4.32413	6.05401	4.24914	2.21544	4.07937	4.2008	5.1894	3.73086	6.77828
Chr1:27970051-27971100	1	27970051	27971100	NA	null					Not found	0	5.43327	5.29163	5.15812	3.40637	4	3.99439	4.94849	4.72603	5.90226	4.43607	5.12995	3.90909	5.54381	4.47154	3.02279	2.2049	3.75334	4.01947	4.19029	6.22574
Chr1:27976501-27978000	1	27976501	27978000	NA	null					Not found	0	7.10705	9.08864	6.11082	7.05845	7.25739	8.10987	7.09288	5.9066	5.85163	6.64906	8.99648	4.54652	6.92568	6.09045	4.91588	5.52683	4.93776	5.86077	6.79695	7.04677
Chr1:27998251-27999900	1	27998251	27999900	NA	IFI6-001	ENSP00000354736	interferon, alpha-inducible protein 6 [Source:HGNC Symbol;Acc:4054]	-	CDS	downstream	2426	9.19577	8.94698	9.05568	8.71276	8.68299	8.81457	9.1057	8.65203	9.63673	8.97099	8.48629	8.72785	9.4153	8.9588	8.81906	9.37148	9.04879	7.03442	9.22271	8.8187
Chr1:28051501-28053300	1	28051501	28053300	NA	FAM76A-001	ENSP00000363065	family with sequence similarity 76, member A [Source:HGNC Symbol;Acc:28530]	+	CDS	overlapping	0	9.54875	9.77383	9.4847	8.84219	8.98868	9.69483	9.60745	9.4041	10.0072	9.14155	10.1001	8.46708	9.88959	9.36809	8.87721	9.77475	8.96633	9.24508	9.46218	9.91131
Chr1:28098901-28100400	1	28098901	28100400	NA	STX12-001	ENSP00000363054	syntaxin 12 [Source:HGNC Symbol;Acc:11430]	+	CDS	overlapping	0	8.98932	8.89451	8.83328	8.76894	8.5812	8.91326	9.34802	8.7675	9.78574	9.16151	9.15766	8.98234	9.27091	8.83911	8.84479	8.79984	9.21575	8.19606	9.27002	8.80267
Chr1:28156501-28158750	1	28156501	28158750	NA	PPP1R8-001	ENSP00000311677	protein phosphatase 1, regulatory subunit 8 [Source:HGNC Symbol;Acc:9296]	+	CDS	overlapping	0	9.85153	9.99761	9.86214	9.49383	9.44087	9.65261	9.88296	9.51262	10.1264	10.2736	9.78767	9.55295	10.2341	9.8954	9.85929	9.64508	9.36537	9.40318	9.87552	10.0228
Chr1:28184251-28185300	1	28184251	28185300	NA	null					Not found	0	5.62592	5.49326	6.74309	4.59902	4.45943	5.45382	5.02249	4.72603	4.95117	5.43607	6.24925	5.90909	6.54381	5.41907	5.94336	5.47792	4.99434	5.3414	6.19029	6.99128
Chr1:28240351-28242150	1	28240351	28242150	NA	RPA2-001	ENSP00000363021	replication protein A2, 32kDa [Source:HGNC Symbol;Acc:10290]	-	CDS	overlapping	0	9.59938	9.77383	8.99509	8.58201	8.92778	9.03148	9.34442	8.22853	10.3111	9.41543	9.26349	8.23102	9.71617	9.67261	8.70729	8.82939	8.00815	9.13495	8.33819	9.61806
Chr1:28292851-28294050	1	28292851	28294050	NA	XKR8-001	ENSP00000362991	XK, Kell blood group complex subunit-related family, member 8 [Source:HGNC Symbol;Acc:25508]	+	CDS	overlapping	0	5.36288	5.67014	6.84778	5.12258	6.20945	5.76698	5.70056	4.9066	8.59887	5.14656	5.55737	5.69336	6.70887	5.61838	4.53736	5.42729	4.46383	4.89394	4.31582	6.77828
Chr1:28305751-28306950	1	28305751	28306950	NA	EYA3-001	ENSP00000362978	eyes absent homolog 3 (Drosophila) [Source:HGNC Symbol;Acc:3521]	-	CDS	overlapping	0	5.12842	4.55466	6.2263	4.40637	4.9542	7.00934	5.70056	3.14106	7.50371	6.33419	0.271968	3.54652	8.07685	5.87364	3.8004	2.2049	5.2008	4.68244	6.90079	7.56678
Chr1:28414201-28415850	1	28414201	28415850	NA	null					Not found	0	9.65198	9.87358	8.97211	9.38365	9.16491	9.15762	9.23195	8.80782	9.40183	9.43197	9.67711	8.97278	9.54654	9.20334	9.21262	9.17836	8.79773	9.09984	9.19439	9.55247
Chr1:28431151-28432500	1	28431151	28432500	NA	null					Not found	0	5.28888	4.13963	6.15812	7.16887	7.64386	5.16432	4.60745	4.98906	5.2922	4.14656	3.7314	5.94862	4.89174	4.12361	7.03562	4.7074	6.1268	5.24186	6.48575	6.48878
Chr1:28438951-28440000	1	28438951	28440000	NA	null					Not found	0	4.36288	4.67014	5.66336	5.50591	7.53916	3.57936	4.15999	4.72603	3.85163	2.97664	6.44189	7.1142	3.66934	2.66418	4.53736	7.07937	6.17655	4.89394	3.53822	5.84241
Chr1:28455151-28456500	1	28455151	28456500	NA	null					Not found	0	4.62592	5.21763	5.24832	2.18398	5.04439	3.86886	4.78803	4.4041	3.85163	4.88353	6.27197	4.32413	4.40631	3.83411	3.53736	4.52683	2.61583	5.43451	3.90079	6.40631
Chr1:28519951-28521000	1	28519951	28521000	NA	null					Not found	0	4.36288	5.05716	4.95882	4.29946	4.58496	3.99439	5.28553	4.4041	4.95117	3.78399	4.91582	3.54652	5.14328	4.91211	3.67487	4.7074	2.87887	5.38871	3.53822	6.77828
Chr1:28558801-28560000	1	28558801	28560000	NA	DNAJC8-001	ENSP00000263697	DnaJ (Hsp40) homolog, subfamily C, member 8 [Source:HGNC Symbol;Acc:15470]	-	CDS	overlapping	0	8.81574	9.3534	8.79264	8.52975	8.20945	8.64305	8.75041	8.95356	9.14756	8.78399	9.24063	8.07008	9.11044	8.69209	8.61204	8.72322	8.15809	8.86077	8.33819	9.23174
Chr1:28561651-28563900	1	28561651	28563900	NA	ATPIF1-003	ENSP00000435579	ATPase inhibitory factor 1 [Source:HGNC Symbol;Acc:871]	+	CDS	overlapping	0	9.98054	10.0625	9.48005	9.48471	9.17243	9.56678	9.42848	9.49862	10.1317	10.0454	9.94969	8.98234	10.1324	9.59196	9.16088	9.65611	9.20679	9.93833	9.37832	10.0018
Chr1:28584901-28587000	1	28584901	28587000	NA	SESN2-001	ENSP00000253063	sestrin 2 [Source:HGNC Symbol;Acc:20746]	+	CDS	overlapping	0	9.62592	9.18402	9.28341	8.99133	9.28309	9.61644	8.83499	10.6005	9.52406	9.01556	10.0368	9.58151	9.36051	9.35767	8.33956	9.64784	9.60224	9.08556	8.80232	9.47367
Chr1:28639951-28641300	1	28639951	28641300	NA	null					Not found	0	4.50039	4.13963	5.72749	5.64341	6.14975	5.86886	4.15999	4.27857	5.04428	3.78399	4.5199	3.90909	4.40631	3.24914	4.38536	3.61994	2.61583	5.07836	1.73086	5.31885
Chr1:28654651-28656750	1	28654651	28656750	NA	MED18-001	ENSP00000362948	mediator complex subunit 18 [Source:HGNC Symbol;Acc:25944]	+	CDS	downstream	424	8.45881	9.76736	9.35875	8.99562	9.06878	9.45928	9.05812	9.33484	10.0386	9.34733	9.91582	9.10111	9.88096	9.44554	9.1638	8.87732	8.56069	9.98718	9.01626	9.9591
Chr1:28672051-28673400	1	28672051	28673400	NA	null					Not found	0	5.12842	4.67014	5.75852	6.8658	8.34873	7.80175	5.28553	4.98906	5.50371	4.67708	6.57575	6.78356	5.08438	4.57107	6.38536	5.37482	6.48373	7.1894	4.53822	5.71117
Chr1:28677301-28679550	1	28677301	28679550	NA	null					Not found	0	4.7414	5.36202	6.69578	8.9999	9.88722	6.38671	5.91002	5.62649	5.62924	5.14656	9.46673	5.78356	5.14328	4.98611	8.0858	6.32038	5.68622	6.87745	3.90079	6.01929
Chr1:28695451-28697850	1	28695451	28697850	NA	null					Not found	0	10.3077	10.503	9.74889	9.457	9.51175	9.71777	10.0993	9.68332	10.85	10.2895	9.90859	9.53033	10.4108	10.409	9.67282	9.94412	9.58623	9.90618	9.75877	10.538
Chr1:28743451-28744800	1	28743451	28744800	NA	PHACTR4-001	ENSP00000362945	phosphatase and actin regulator 4 [Source:HGNC Symbol;Acc:25793]	+	CDS	overlapping	0	5.21088	4.29163	7.19261	8.62138	7.75489	7.5693	6.42848	9.43385	7.04428	6.90738	5.17886	6.02457	6.56551	3.98611	5.88786	5.86786	6.3383	4.24186	7.6135	5.90381
Chr1:28763401-28765200	1	28763401	28765200	NA	PHACTR4-001	ENSP00000362945	phosphatase and actin regulator 4 [Source:HGNC Symbol;Acc:25793]	+	CDS	overlapping	0	8.30774	8.0141	8.97211	9.33034	8.86728	8.70405	8.30048	8.10454	5.95117	7.16646	8.23775	8.69336	8.34491	7.41907	9.0703	7.81961	8.60679	7.25469	8.76429	7.6764
Chr1:28827151-28828500	1	28827151	28828500	NA	PHACTR4-001	ENSP00000362945	phosphatase and actin regulator 4 [Source:HGNC Symbol;Acc:25793]	+	CDS	upstream	4090	6.39851	5.13963	8.6756	8.21373	7.8009	6.88516	5.87049	5.4041	5.90226	5.5616	4.17886	5.4396	5.3574	5.18774	6.34472	6.4013	5.2481	5.75644	5.53822	6.27305
Chr1:28851901-28854150	1	28851901	28854150	NA	RCC1-007	ENSP00000405258	regulator of chromosome condensation 1 [Source:HGNC Symbol;Acc:1913]	+	CDS	overlapping	0	5.36288	6.13963	6.81864	4.50591	7.43463	5.8357	6.12683	5.57402	5.79916	5.0641	4.91582	5.49405	5.92568	4.66418	5.739	5.01225	5.54183	6.16243	5.05279	6.87344
Chr1:28878751-28881000	1	28878751	28881000	NA	TRNAU1AP-001	ENSP00000362936	tRNA selenocysteine 1 associated protein 1 [Source:HGNC Symbol;Acc:30813]	+	CDS	overlapping	0	9.80583	9.93837	9.44472	8.94774	8.94544	9.25805	9.44876	8.62649	10.1397	9.56535	9.96371	8.99655	9.74021	9.42573	9.14321	9.47792	9.25391	9.47617	9.17795	9.54767
Chr1:28906801-28909800	1	28906801	28909800	NA	TRNAU1AP-001	ENSP00000362936	tRNA selenocysteine 1 associated protein 1 [Source:HGNC Symbol;Acc:30813]	+	CDS	upstream	2653	10.0522	10.3876	9.84778	10.2855	9.99435	9.57434	9.74222	9.74691	10.9131	9.57283	10.6492	9.49071	10.0825	9.78053	10.2707	10.0997	9.53231	10.1315	8.95486	9.91131
Chr1:28927801-28930050	1	28927801	28930050	NA	TAF12-002	ENSP00000362930	TAF12 RNA polymerase II, TATA box binding protein (TBP)-associated factor, 20kDa [Source:HGNC Symbol;Acc:11545]	-	CDS	upstream	1	7.10705	7.2551	9.31506	9.27497	9.06609	8.34607	7.52074	7.71395	8.2922	7.64906	7.78767	7.65803	8.51623	7.20334	7.20412	9.30293	8.08181	7.07836	7.57635	7.72824
Chr1:28974151-28976100	1	28974151	28976100	NA	null					Not found	0	9.90204	10.0704	9.4471	9.79869	9.48382	9.58934	9.64308	9.45213	10.6084	9.91915	9.50798	9.00126	10.1505	9.86385	9.6099	8.79486	9.26257	9.58933	9.71955	10.0193
Chr1:29062501-29065050	1	29062501	29065050	NA	YTHDF2-001	ENSP00000362918	YTH domain family, member 2 [Source:HGNC Symbol;Acc:31675]	+	CDS	overlapping	0	10.4418	11.0072	10.0193	10.2045	9.92035	9.90728	10.4488	10.1568	10.4452	10.4463	10.4875	9.90658	10.4853	10.556	9.92452	10.242	9.72853	10.2451	10.3045	10.4274
Chr1:29154451-29155650	1	29154451	29155650	NA	OPRD1-001	ENSP00000234961	opioid receptor, delta 1 [Source:HGNC Symbol;Acc:8153]	+	CDS	overlapping	0	4.62592	5.29163	5.06191	3.92094	5.85798	4.80175	4.15999	3.98906	7.58344	4.67708	3.27197	2.32413	3.08438	3.47154	2.53736	3.61994	0.293905	3.89394	4.81832	3.90381
Chr1:29172301-29173200	1	29172301	29173200	NA	OPRD1-001	ENSP00000234961	opioid receptor, delta 1 [Source:HGNC Symbol;Acc:8153]	+	CDS	overlapping	0	4.50039	4.13963	5.24832	3.76894	4	4.10987	5.02249	3.62649	5.43659	1.97664	6.20271	0.739163	4.82135	4.36462	3.67487	0.619936	0.293905	4.3414	4.90079	4.90381
Chr1:29203351-29204400	1	29203351	29204400	NA	null					Not found	0	4.94785	4.42913	4.72749	3.76894	4.16993	3.86886	4.78803	2.81914	6.50371	3.97664	3.27197	3.32413	4.58688	2.98611	4.12233	3.2049	1.87887	4.75644	3.73086	4.31885
Chr1:29240101-29241450	1	29240101	29241450	NA	EPB41-203	ENSP00000351880	erythrocyte membrane protein band 4.1 (elliptocytosis 1, RH-linked) [Source:HGNC Symbol;Acc:3377]	+	CDS	overlapping	0	8.95982	9.46556	7.92503	6.15361	7.62936	8.08891	8.44203	7.98906	9.73427	8.85928	9.29156	6.49405	8.3574	9.09463	7.70729	8.25656	6.07526	9.00436	7.38907	9.48376
Chr1:29282101-29283300	1	29282101	29283300	NA	EPB41-203	ENSP00000351880	erythrocyte membrane protein band 4.1 (elliptocytosis 1, RH-linked) [Source:HGNC Symbol;Acc:3377]	+	CDS	overlapping	0	5.7414	7.42913	5.48933	5.24287	5.32193	6.88516	5.09288	5.14106	5.36621	7.0641	3.44189	4.64605	3.95885	5.75164	4.53736	5.2049	7.85615	4.82683	6.4313	7.87344
Chr1:29285701-29287350	1	29285701	29287350	NA	EPB41-203	ENSP00000351880	erythrocyte membrane protein band 4.1 (elliptocytosis 1, RH-linked) [Source:HGNC Symbol;Acc:3377]	+	CDS	overlapping	0	3.36288	5.72459	4.78889	2.92094	5.04439	4.31632	3.02249	4.14106	5.2142	4.5616	3.27197	2.73916	2.49942	3.66418	4.60775	4.2049	4.87887	4.82683	3.31582	5.90381
Chr1:29298001-29299800	1	29298001	29299800	NA	EPB41-203	ENSP00000351880	erythrocyte membrane protein band 4.1 (elliptocytosis 1, RH-linked) [Source:HGNC Symbol;Acc:3377]	+	CDS	overlapping	0	5.21088	6.80259	7.34348	5.99133	7.82018	8.79745	5.09288	6.86353	5.04428	5.97664	7.30539	8.48063	3.82135	4.66418	6.07342	6.78986	9.28259	4.13495	5.05279	6.17683
Chr1:29506801-29509200	1	29506801	29509200	NA	SRSF4-201	ENSP00000392695	serine/arginine-rich splicing factor 4 [Source:HGNC Symbol;Acc:10786]	-	CDS	overlapping	0	10.5388	10.7657	10.0604	10.4492	9.95274	10.2798	10.4302	10.319	10.9162	10.6561	10.2159	10.1011	10.5078	10.4472	9.89668	10.1277	9.95033	10.1539	10.3308	10.6385
Chr1:29528701-29530200	1	29528701	29530200	NA	MECR-002	ENSP00000362896	mitochondrial trans-2-enoyl-CoA reductase [Source:HGNC Symbol;Acc:19691]	-	CDS	overlapping	0	7.36288	7.2551	8.48933	8.10681	7.98869	8.78012	7.80909	6.92766	9.36169	7.69088	6.29434	8.18211	8.43016	8.12361	7.68304	7.8391	8.08181	7.17598	8.13174	8.01929
Chr1:29556601-29558250	1	29556601	29558250	NA	MECR-001	ENSP00000263702	mitochondrial trans-2-enoyl-CoA reductase [Source:HGNC Symbol;Acc:19691]	-	CDS	overlapping	0	8.72746	9.10413	8.26462	8.20635	8.32643	8.67153	8.50146	8.41159	9.0832	8.57655	9.00329	8.02457	9.00721	8.79861	8.34986	8.16683	7.90861	9.01571	8.50565	8.82664
Chr1:29705701-29706600	1	29705701	29706600	NA	null					Not found	0	3.36288	2.9697	4.37385	0.599017	2.32193	3.21679	3.02249	0.819136	4.74472	2.5616	0.271968	4.06109	3.30677	2.24914	3.21544	0.619936	3.75334	2.43451	1.73086	2.90381
Chr1:29839501-29840550	1	29839501	29840550	NA	null					Not found	0	4.21088	4.42913	3.52586	4.40637	4.45943	5.31632	4.15999	4.51958	8.75852	4.14656	4.66429	5.64605	4.19986	2.24914	2.21544	5.74922	4.2008	3.43451	3.05279	4.31885
Chr1:30042301-30044850	1	30042301	30044850	NA	null					Not found	0	5.68481	5.21763	9.16393	8.54738	9.62753	8.00934	6.05812	6.51958	5.62924	4.29857	7.2832	9.75875	5.02298	4.83411	7.37531	10.0229	9.34647	5.29249	5.05279	7.36324
Chr1:30052351-30053400	1	30052351	30053400	NA	null					Not found	0	3.36288	5.13963	5.11082	2.92094	5	6.31632	4.401	3.62649	4.2142	2.5616	5.66429	7.46708	4.19986	0.664182	3.8004	6.92372	6.61583	3.24186	2.73086	6.5283
Chr1:30111601-30114300	1	30111601	30114300	NA	null					Not found	0	4.7414	6.05716	7.91129	8.22107	8.41363	7.6286	5.45545	4.98906	6.68813	5.36896	4.79553	9.55295	5.08438	4.12361	6.2378	9.05873	8.75743	5.68244	3.53822	7.15174
Chr1:30121951-30123000	1	30121951	30123000	NA	null					Not found	0	3.36288	3.29163	5.29139	8.3738	7.66534	4.86886	4.50792	3.14106	5.2922	2.97664	5.55737	4.4396	3.49942	2.66418	6.6417	7.66433	3.87887	3.24186	3.73086	6.01929
Chr1:30141751-30142650	1	30141751	30142650	NA	null					Not found	0	3.04096	2.55466	4.45186	2.59902	3	4.31632	4.50792	0.819136	4.95117	3.78399	2.85693	1.73916	4.49942	2.24914	2.53736	4.61994	4.2939	4.60443	3.90079	7.36324
Chr1:30181351-30183300	1	30181351	30183300	NA	null					Not found	0	5.12842	4.9697	9.54378	9.94331	9.70044	10.4701	6.67784	6.31099	10.0014	6.93083	9.7066	10.5238	10.2526	4.12361	7.53736	10.3947	10.0948	7.51132	4.05279	7.72824
Chr1:30261751-30263100	1	30261751	30263100	NA	null					Not found	0	4.62592	3.9697	3.20393	4.05845	2.32193	7.51795	3.02249	4.62649	5.2922	2.97664	3.5939	2.32413	4.58688	3.83411	2.53736	4.2049	1.29391	4.13495	3.53822	5.40631
Chr1:30273151-30274350	1	30273151	30274350	NA	null					Not found	0	2.04096	4.13963	3.90437	4.05845	2.32193	5.26741	3.28553	2.4041	5.2142	1.97664	1.85693	3.73916	4.66934	3.83411	1.8004	3.2049	3.10126	5.29249	3.05279	6.01929
Chr1:30478801-30479850	1	30478801	30479850	NA	null					Not found	0	1.04096	4.55466	1.78889	3.59902	3.45943	4.65736	4.02249	3.62649	4.2142	3.5616	2.5939	2.32413	2.82135	4.12361	2.21544	2.2049	0.293905	3.01947	3.53822	4.1262
Chr1:30531451-30532500	1	30531451	30532500	NA	null					Not found	0	3.36288	3.77706	4.20393	6.9028	6.45943	5.21679	4.401	3.14106	5.2142	4.5616	4.44189	5.54652	4.66934	3.83411	5.53736	5.61994	6.75334	4.52197	0.730862	4.48878
Chr1:30541351-30542400	1	30541351	30542400	NA	null					Not found	0	3.36288	3.77706	3.37385	2.18398	4.16993	4.10987	3.87049	2.4041	4.04428	3.78399	3.5939	0.739163	2.82135	3.47154	1.8004	3.42729	2.29391	3.43451	3.53822	4.90381
Chr1:30555901-30557700	1	30555901	30557700	NA	null					Not found	0	4.36288	4.42913	6.86214	7.5648	7.90689	9.94859	4.70056	4.62649	6.65899	5.0641	7.64701	9.82131	6.38206	4.36462	4.85929	5.78986	9.68407	9.00056	3.53822	7.29613
Chr1:30663601-30664650	1	30663601	30664650	NA	null					Not found	0	3.04096	2.55466	4.90437	2.92094	5.2854	3.99439	3.50792	3.81914	4.2142	4.5616	2.5939	3.32413	2.82135	3.24914	6.38536	2.2049	2.87887	4.52197	3.73086	4.90381
Chr1:30998251-30999900	1	30998251	30999900	NA	null					Not found	0	3.62592	3.55466	5.69578	5.99133	5.55459	7.50746	4.94849	6.79642	4.95117	4.67708	8.49597	3.90909	5.66934	3.24914	4.21544	5.26379	2.87887	6.3887	4.53822	6.27305
Chr1:31090501-31092150	1	31090501	31092150	NA	null					Not found	0	4.50039	4.13963	4.84778	7.25723	7.31288	5.31632	4.401	5.3427	5.74472	3.97664	1.85693	3.54652	5.02298	4.36462	4.12233	5.26379	0.293905	5.01947	4.19029	6.40631
Chr1:31118251-31119450	1	31118251	31119450	NA	null					Not found	0	1.04096	2.55466	4.20393	1.59902	2.58496	3.86886	5.15999	4.62649	4.2142	3.97664	1.85693	4.1986	2.82135	3.98611	3.21544	3.61994	2.61583	3.75644	2.31582	6.1262
Chr1:31125751-31128150	1	31125751	31128150	NA	null					Not found	0	5.12842	4.9697	4.52586	3.92094	4.85798	5.31632	5.15999	4.62649	5.13174	4.67708	4.17886	3.54652	5.02298	3.98611	3.91588	6.95979	2.61583	5.1894	3.53822	6.22574
Chr1:31157251-31159200	1	31157251	31159200	NA	null					Not found	0	3.84831	3.29163	3.01128	2.92094	4.39232	5.65736	5.15999	4.4041	5.13174	3.78399	3.7314	4.06109	3.08438	3.98611	2.21544	3.61994	3.87887	5.1894	3.05279	6.56678
Chr1:31173151-31174500	1	31173151	31174500	NA	null					Not found	0	4.7414	5.29163	6.64687	5.457	6.50779	7.25492	6.05812	7.50564	7.61413	4.67708	6.62952	6.13148	6.19986	3.83411	5.02279	6.68603	5.15189	4.60443	5.63775	7.04677
Chr1:31269751-31272300	1	31269751	31272300	NA	null					Not found	0	7.98347	8.04652	7.29139	7.49383	7.08746	7.6091	8.69492	4.9066	6.59887	8.23403	9.95672	4.90909	7.30677	6.75164	7.89492	6.57413	3.87887	7.07836	8.36022	8.63173
Chr1:31281901-31283400	1	31281901	31283400	NA	null					Not found	0	6.99515	7.01409	7.39375	6.70754	7.45943	6.02414	7.64308	7.6005	5.2142	7.04273	8.50079	8.35387	7.88312	6.93097	5.8004	7.44012	8.02861	6.89394	7.40329	8.72824
Chr1:31296151-31298250	1	31296151	31298250	NA	null					Not found	0	10.3985	10.5358	10.0352	9.4632	8.76155	9.44285	10.6416	8.96379	10.7273	10.5747	9.90678	8.6758	10.2955	10.5934	9.37278	9.90071	8.62482	9.18605	10.1985	9.74092
Chr1:31537351-31539300	1	31537351	31539300	NA	PUM1-012	ENSP00000435825	pumilio homolog 1 (Drosophila) [Source:HGNC Symbol;Acc:14957]	-	CDS	overlapping	0	10.2553	10.2758	9.87635	9.92769	9.53138	9.83988	10.2949	9.71395	10.4768	10.1415	10.0101	9.74759	10.3433	10.2789	9.79098	9.80729	9.63375	9.91832	9.93299	10.2643
Chr1:31627051-31629150	1	31627051	31629150	NA	null					Not found	0	9.26012	9.21763	9.27002	9.39018	9.49985	8.97548	9.32992	9.09991	10.1449	9.19096	10.0631	9.19449	9.84815	8.87364	9.51922	9.77728	9.16118	9.80737	8.40329	9.87344
Chr1:31635151-31636500	1	31635151	31636500	NA	null					Not found	0	6.17024	6.58441	7.02411	7.38038	7.01123	6.13735	5.94849	6.43385	6.59887	6.26204	6.90132	5.86845	7.69909	5.70858	6.72323	6.55067	6.29391	7.32933	6.40329	7.85801
Chr1:31643101-31644450	1	31643101	31644450	NA	null					Not found	0	6.84831	6.39597	7.91129	9.30292	9.06609	8.1509	6.42848	8.08592	6.90226	5.36896	8.47654	7.73916	8.70887	5.52216	8.07342	7.93282	8.32181	8.28626	6.22271	7.36324
Chr1:31768801-31770750	1	31768801	31770750	NA	SNRNP40-001	ENSP00000263694	small nuclear ribonucleoprotein 40kDa (U5) [Source:HGNC Symbol;Acc:30857]	-	CDS	overlapping	0	10.2357	10.3663	9.78513	9.8206	9.28771	9.7515	10.0089	9.99656	10.2464	10.3298	10.2027	9.19449	10.1306	10.1133	9.67896	9.63116	8.95212	9.79206	9.78885	9.8849
Chr1:31778851-31779750	1	31778851	31779750	NA	ZCCHC17-001	ENSP00000343557	zinc finger, CCHC domain containing 17 [Source:HGNC Symbol;Acc:30246]	+	CDS	downstream	3196	4.36288	4.29163	8.06191	7.69705	7.98299	7.67622	4.401	8.74395	6.36621	6.10592	7.40125	7.35387	4.58688	4.91211	8.4681	6.4013	7.34919	2.43451	6.22271	5.64078
Chr1:31894951-31896300	1	31894951	31896300	NA	SERINC2-002	ENSP00000362814	serine incorporator 2 [Source:HGNC Symbol;Acc:23231]	+	CDS	overlapping	0	5.68481	5.87659	6.15812	5.457	6.6865	5.31632	6.31527	6.81914	7.90226	6.46849	5.02686	6.71644	7.11413	7.3921	6.09808	6.72846	6.2481	5.01947	5.58884	6.84241
Chr1:31898251-31899900	1	31898251	31899900	NA	SERINC2-002	ENSP00000362814	serine incorporator 2 [Source:HGNC Symbol;Acc:23231]	+	CDS	overlapping	0	5.36288	6.21763	5.11082	2.18398	5.78136	5.31632	5.91002	5.27857	6.13174	5.97664	4.27197	4.82663	5.3574	5.79346	5.07342	5.86786	2.87887	5.3414	4.81832	6.96271
Chr1:31944001-31945050	1	31944001	31945050	NA	null					Not found	0	3.62592	4.13963	4.11082	2.18398	5.04439	2.73136	5.28553	5.67712	6.2922	2.97664	2.5939	3.32413	4.40631	4.66418	4.67487	4.94186	2.61583	3.60443	3.05279	5.56678
Chr1:31988401-31989900	1	31988401	31989900	NA	null					Not found	0	5.28888	4.42913	4.01128	2.92094	5.64386	3.21679	5.09288	3.98906	5.50371	4.14656	4.17886	3.54652	4.74735	5.30804	4.38536	4.78986	5.3383	5.64396	3.90079	6.44813
Chr1:32000851-32001900	1	32000851	32001900	NA	null					Not found	0	4.04096	4.77706	3.52586	2.18398	3.16992	3.86886	4.60745	2.4041	5.50371	4.78399	1.85693	2.32413	4.19986	3.47154	3.38536	3.61994	1.87887	4.89394	4.05279	3.90381
Chr1:32014051-32016150	1	32014051	32016150	NA	null					Not found	0	6.65567	7.88856	6.98529	7.10681	8.57743	6.10987	7.94849	6.37372	9.18894	7.45237	8.87188	7.84769	7.74735	7.40565	9.75071	7.79985	7.40243	7.97367	7.33077	8.16434
Chr1:32027401-32030400	1	32027401	32030400	NA	null					Not found	0	5.79584	5.77706	6.29139	4.05845	5.93074	5.86886	6.60745	4.98906	7.43659	6.26204	4.85693	6.86845	6.82135	6.12361	5.60775	5.07937	5.2939	6.36525	5.68506	7.50867
Chr1:32053051-32055450	1	32053051	32055450	NA	TINAGL1-001	ENSP00000271064	tubulointerstitial nephritis antigen-like 1 [Source:HGNC Symbol;Acc:19168]	+	CDS	upstream	471	6.08535	6.09898	6.61332	7.21373	6.76818	7.44285	6.401	8.33484	7.56784	5.62049	5.07932	8.39738	6.58688	5.61838	8.53736	7.85834	7.41285	6.3414	6.08841	7.07374
Chr1:32109301-32111700	1	32109301	32111700	NA	PEF1-001	ENSP00000362807	penta-EF-hand domain containing 1 [Source:HGNC Symbol;Acc:30009]	-	CDS	overlapping	0	10.2382	10.362	9.96382	9.87514	9.84549	10.1875	10.162	10.1811	10.6423	10.2198	10.0857	9.86587	10.4033	10.1338	9.95522	10.0462	9.61583	10.027	9.8498	10.393
Chr1:32134951-32136450	1	32134951	32136450	NA	COL16A1-001	ENSP00000362776	collagen, type XVI, alpha 1 [Source:HGNC Symbol;Acc:2193]	-	CDS	overlapping	0	8.69201	8.05716	7.02411	5.64341	7.39232	7.34017	9.35877	8.0383	8.2731	7.66314	7.81113	5.54652	9.09188	8.58305	6.60775	7.1435	7.27118	7.14875	7.56375	8.54767
Chr1:32154901-32156400	1	32154901	32156400	NA	COL16A1-001	ENSP00000362776	collagen, type XVI, alpha 1 [Source:HGNC Symbol;Acc:2193]	-	CDS	overlapping	0	5.79584	5.9239	5.33321	6.09087	8.63662	6.19079	7.67784	3.4041	5.68813	6.26204	9.65999	9.61568	6.68924	6.09045	6.16963	7.72846	8.60679	6.97367	5.48575	8.42737
Chr1:32166001-32167650	1	32166001	32167650	NA	COL16A1-001	ENSP00000362776	collagen, type XVI, alpha 1 [Source:HGNC Symbol;Acc:2193]	-	CDS	overlapping	0	10.1831	10.0304	7.37385	9.05845	9.21189	9.14075	10.4079	9.49156	9.52406	10.3754	10.1423	9.79986	10.0825	10.2899	9.80415	9.77222	9.80763	8.93036	9.74767	9.4686
Chr1:32253001-32255550	1	32253001	32255550	NA	SPOCD1-001	ENSP00000257100	SPOC domain containing 1 [Source:HGNC Symbol;Acc:26338]	-	CDS	upstream	654	10.5547	10.1421	9.75275	8.98272	9.35535	9.5693	10.4998	9.70178	9.48307	10.3754	10.0352	8.92404	10.6631	10.3733	9.30024	10.0441	9.08507	10.0529	10.6012	10.9169
Chr1:32263051-32265300	1	32263051	32265300	NA	SPOCD1-001	ENSP00000257100	SPOC domain containing 1 [Source:HGNC Symbol;Acc:26338]	-	CDS	overlapping	0	7.9236	6.05716	9.06501	6.59902	8.30378	9.00934	7.20836	9.51958	7.08867	7.62049	9.17886	10.0475	7.34491	6.36462	9.08272	10.2656	9.60679	7.46793	10.064	9.0804
Chr1:32280901-32282250	1	32280901	32282250	NA	SPOCD1-007	ENSP00000353670	SPOC domain containing 1 [Source:HGNC Symbol;Acc:26338]	-	CDS	overlapping	0	4.84831	5.42913	5.41338	3.76894	5.58496	5.73136	5.65476	5.98906	6.2142	4.67708	5.97241	6.1986	5.74735	4.47154	4.38536	4.42729	6.22464	5.71991	5.94032	6.93356
Chr1:32308801-32309850	1	32308801	32309850	NA	null					Not found	0	7.30774	3.9697	7.97871	2.18398	3.32193	7.13735	7.12683	8.71395	9.76879	6.85928	2.85693	6.59714	8.83481	8.91685	3.38536	4.42729	3.99434	4.3414	5.97879	8.35227
Chr1:32388001-32389050	1	32388001	32389050	NA	PTP4A2-001	ENSP00000344909	protein tyrosine phosphatase type IVA, member 2 [Source:HGNC Symbol;Acc:9635]	-	CDS	downstream	3335	5.28888	7.34474	7.67153	6.05845	4.80735	5.45382	4.70056	5.21145	4.74472	5.22457	6.84182	4.54652	6.17184	4.57107	4.02279	4.7074	4.93776	4.52197	6.73086	6.22574
Chr1:32409001-32411550	1	32409001	32411550	NA	null					Not found	0	6.28888	5.82768	7.4036	10.2026	4.45943	6.55918	6.09288	9.43385	5.68813	6.90738	10.1638	9.32788	8.72824	5.52216	8.77386	8.7074	9.14565	6.97367	7.56375	7.31885
Chr1:32419801-32422350	1	32419801	32422350	NA	null					Not found	0	7.76888	8.6562	9.77947	10.4923	9.56796	9.76258	7.85031	10.6184	8.11037	6.43607	9.69823	9.49405	8.42423	7.82405	9.10722	9.61994	9.67977	7.28	7.57635	8.38494
Chr1:32429251-32430450	1	32429251	32430450	NA	null					Not found	0	5.79584	5.72459	6.03682	7.84694	6.24793	5.49689	5.09288	7.06706	6.47054	5.43607	5.44189	4.4396	6.99127	6.15603	5.21544	4.7074	6.04879	5.75644	6.34557	7.31885
Chr1:32478151-32481000	1	32478151	32481000	NA	KHDRBS1-001	ENSP00000313829	KH domain containing, RNA binding, signal transduction associated 1 [Source:HGNC Symbol;Acc:18116]	+	CDS	overlapping	0	10.9343	10.9355	10.3913	10.5934	10.1202	10.5258	10.7973	10.5623	11.2827	10.8299	10.4948	10.1443	10.827	10.8278	10.214	10.5358	10.0883	10.5127	10.5716	10.9788
Chr1:32531701-32532750	1	32531701	32532750	NA	null					Not found	0	5.43327	6.52429	6.13467	5.12258	5.97728	3.99439	4.94849	3.62649	3.04428	5.67708	3.85693	5.73916	5.6287	5.47154	5.02279	4.7074	7.21277	5.52197	5.48575	6.87344
Chr1:32537701-32539650	1	32537701	32539650	NA	TMEM39B-001	ENSP00000338165	transmembrane protein 39B [Source:HGNC Symbol;Acc:25510]	+	CDS	overlapping	0	10.2406	10.3791	9.93864	9.61024	9.57175	9.87704	10.2761	9.85256	10.8708	10.5177	9.96546	9.8133	10.3418	10.3454	9.81163	9.95979	9.88449	9.91024	10.0415	10.4378
Chr1:32566501-32567550	1	32566501	32567550	NA	TMEM39B-001	ENSP00000338165	transmembrane protein 39B [Source:HGNC Symbol;Acc:25510]	+	CDS	overlapping	0	4.50039	5.21763	4.66336	3.18398	6.02237	4.86886	4.15999	2.81914	5.13174	4.14656	4.5939	7.30902	5.25431	3.98611	3.02279	3.2049	7.57003	4.24186	4.4313	5.01929
Chr1:32580751-32582400	1	32580751	32582400	NA	KPNA6-001	ENSP00000362728	karyopherin alpha 6 (importin alpha 7) [Source:HGNC Symbol;Acc:6399]	+	CDS	overlapping	0	5.04096	5.67014	5.78889	4.18398	5.45943	5.21679	5.22412	4.72603	5.2142	3.97664	4.17886	7.30902	5.58688	5.12361	2.8004	4.61994	7.1394	5.13495	4.97879	5.84241
Chr1:32598601-32599950	1	32598601	32599950	NA	KPNA6-001	ENSP00000362728	karyopherin alpha 6 (importin alpha 7) [Source:HGNC Symbol;Acc:6399]	+	CDS	overlapping	0	4.21088	4.9697	8.17547	8.46938	8.21432	5.40943	4.70056	5.51958	5.2142	3.5616	4.44189	7.16543	5.19986	3.47154	8.35499	6.59722	6.81747	4.60443	5.81833	5.31885
Chr1:32604301-32605350	1	32604301	32605350	NA	KPNA6-001	ENSP00000362728	karyopherin alpha 6 (importin alpha 7) [Source:HGNC Symbol;Acc:6399]	+	CDS	overlapping	0	5.68481	5.36202	5.06191	5.80847	5.32193	6.05329	5.15999	2.4041	4.62924	4.29857	0.271968	6.26273	4.89174	4.91211	5.25983	2.2049	6.1268	4.68244	4.19029	5.90381
Chr1:32638051-32639100	1	32638051	32639100	NA	KPNA6-001	ENSP00000362728	karyopherin alpha 6 (importin alpha 7) [Source:HGNC Symbol;Acc:6399]	+	CDS	upstream	1556	4.36288	2.9697	5.66336	4.29946	6.26679	5.36363	3.70056	3.62649	5.50371	4.67708	1.85693	5.32413	4.49942	3.83411	4.21544	3.78986	3.46383	4.43451	4.19029	5.22574
Chr1:32670451-32672550	1	32670451	32672550	NA	CCDC28B-002	ENSP00000362704	coiled-coil domain containing 28B [Source:HGNC Symbol;Acc:28163]	+	CDS	overlapping	0	8.9236	9.314	9.05255	9.13429	8.67596	9.64305	9.0756	8.47735	10.6217	8.77105	9.45188	7.79445	9.4272	9.10713	8.66252	8.91914	7.72853	9.3682	8.35291	9.71117
Chr1:32701351-32702400	1	32701351	32702400	NA	EIF3I-001	ENSP00000362688	eukaryotic translation initiation factor 3, subunit I [Source:HGNC Symbol;Acc:3272]	+	CDS	upstream	4554	5.04096	5.61356	8.00483	8.07475	8.69	6.51795	5.15999	8.54024	5.68813	5.78399	7.16679	8.04294	4.66934	4.47154	8.77386	8.0462	7.82529	3.24186	6.05279	6.31885
Chr1:32705251-32707800	1	32705251	32707800	NA	null					Not found	0	9.73444	11.1067	9.0273	8.75889	9.2854	9.76478	9.41137	9.86898	11.0996	9.38603	10.0269	7.73916	10.2068	9.56203	9.65631	9.11579	9.09804	7.73829	8.28545	9.91876
Chr1:32713351-32714550	1	32713351	32714550	NA	FAM167B-001	ENSP00000362684	family with sequence similarity 167, member B [Source:HGNC Symbol;Acc:28133]	+	CDS	overlapping	0	5.62592	7.23649	5.06191	6.02528	5.08746	5.40943	4.94849	4.72603	4.62924	4.43607	8.67711	4.32413	6.11413	4.75164	5.07342	5.32038	4.99434	7.1894	5.77526	7.50867
Chr1:32739001-32740200	1	32739001	32740200	NA	LCK-011	ENSP00000436554	lymphocyte-specific protein tyrosine kinase [Source:HGNC Symbol;Acc:6524]	+	CDS	overlapping	0	5.7414	4.87659	5.41338	3.40637	4.32193	4.49689	5.34442	3.98906	4.95117	3.78399	3.97241	3.90909	5.02298	4.36462	3.21544	2.61994	3.46383	7.01947	3.53822	6.40631
Chr1:32756251-32758650	1	32756251	32758650	NA	HDAC1-001	ENSP00000362649	histone deacetylase 1 [Source:HGNC Symbol;Acc:4852]	+	CDS	overlapping	0	9.72044	9.89748	9.74502	9.91643	9.92035	9.6621	9.23972	9.52304	8.60652	8.83462	9.70242	9.01529	10.0191	9.60376	9.93483	9.95085	9.10126	10.0307	8.64972	9.89628
Chr1:32815951-32818200	1	32815951	32818200	NA	null					Not found	0	10.4311	10.577	9.74115	9.30292	9.51373	9.77575	10.2024	9.6103	10.7992	10.4154	10.5364	9.42566	10.4681	10.4174	9.71727	9.84875	9.73892	10.2737	9.98589	10.6852
Chr1:32859001-32861100	1	32859001	32861100	NA	BSDC1-201	ENSP00000317670	BSD domain containing 1 [Source:HGNC Symbol;Acc:25501]	-	CDS	overlapping	0	9.58785	9.9239	9.69778	9.44451	9.15987	9.68323	9.59841	9.68022	10.1787	9.67013	9.69823	8.72216	9.92778	9.75958	9.57738	9.50258	9.15189	9.19606	9.48575	9.62263
Chr1:32866051-32867400	1	32866051	32867400	NA	null					Not found	0	6.82232	5.36202	7.39375	6.62138	6.45943	7.1509	5.55854	6.54706	6.59887	5.43607	6.29434	6.64605	6.56551	5.87364	6.04833	6.59722	5.75334	6.24186	6.34557	6.96271
Chr1:32879101-32880150	1	32879101	32880150	NA	null					Not found	0	6.76888	5.82768	5.24832	6.93887	7.21917	4.80175	4.50792	7.04796	6.68813	4.14656	5.31636	2.73916	6.58688	5.36462	5.16963	3.42729	3.10126	6.77436	4.73086	7.1262
Chr1:32913301-32915850	1	32913301	32915850	NA	null					Not found	0	6.68481	7.2551	7.52586	7.24287	7.57743	5.86886	5.401	6.21145	6.32968	5.88353	8.69823	7.69336	6.66934	5.30804	8.01634	5.42729	7.08832	7.93435	6.19029	6.6764
Chr1:32957701-32958750	1	32957701	32958750	NA	null					Not found	0	5.21088	6.82768	7.84055	7.4192	7.88264	4.31632	4.87049	3.81914	5.85163	5.5616	6.64701	3.32413	5.14328	5.18774	8.61632	2.94186	3.75334	4.75644	3.05279	6.44813
Chr1:32965201-32967150	1	32965201	32967150	NA	null					Not found	0	9.87068	10.073	9.50084	9.08283	9.31741	9.462	9.74496	9.54365	10.7061	9.89252	9.6361	9.18211	10.1594	10.1995	9.4869	9.42084	9.02182	9.6561	9.61961	10.366
Chr1:32985751-32986800	1	32985751	32986800	NA	null					Not found	0	6.79584	8.08864	7.57025	6.88442	7.10852	4.93299	5.55854	6.14106	7.08867	4.67708	7.7066	6.29375	7.63897	5.12361	7.97032	7.01225	6.7033	7.77436	7.67338	8.33008
Chr1:33077401-33078750	1	33077401	33078750	NA	ZBTB8OS-201	ENSP00000343760	zinc finger and BTB domain containing 8 opposite strand [Source:HGNC Symbol;Acc:24094]	-	CDS	overlapping	0	5.94785	5.36202	7.98529	6.97406	8.04439	6.08186	5.34442	7.43385	3.62924	5.0641	8.5199	6.82663	6.95885	5.83411	8.35499	7.0462	6.63376	7.59438	5.90079	6.40631
Chr1:33115351-33118050	1	33115351	33118050	NA	ZBTB8OS-201	ENSP00000343760	zinc finger and BTB domain containing 8 opposite strand [Source:HGNC Symbol;Acc:24094]	-	CDS	overlapping	0	10.9236	11.1571	10.4801	10.4969	10.2691	10.4634	10.7202	10.6281	11.2731	10.9696	10.527	10.2705	10.8917	10.8954	10.4515	10.5595	9.96279	10.5893	10.469	11.0451
Chr1:33177451-33178500	1	33177451	33178500	NA	null					Not found	0	5.56452	5.42913	7.02411	6.62138	7.69349	5.69483	4.50792	5.21145	2.62924	4.78399	6.76382	6.4396	7.22734	4.24914	7.06093	7.21985	6.87887	7.36525	5.86015	6.31885
Chr1:33181201-33183450	1	33181201	33183450	NA	null					Not found	0	6.56452	6.80259	7.52586	8.19893	8.66178	6.86886	5.87049	5.67712	5.36621	5.43607	5.31636	5.26273	5.99127	4.91211	9.34986	8.31342	5.50336	7.42319	6.48575	6.48878
Chr1:33190201-33191850	1	33190201	33191850	NA	null					Not found	0	6.99515	6.77706	8.90783	9.79377	9.73132	9.40943	6.22412	8.05754	6.92692	5.36896	7.88668	8.27055	8.83034	6.41907	9.61204	9.86786	9.13311	8.3414	6.34557	7.01929
Chr1:33194251-33196350	1	33194251	33196350	NA	null					Not found	0	5.68481	5.42913	7.75852	6.95657	8.58496	8.03879	5.74496	5.51958	5.2142	4.43607	4.79553	7.90909	5.82135	5.70858	6.97032	8.65336	8.15809	6.43451	5.25442	6.93356
Chr1:33234751-33235950	1	33234751	33235950	NA	KIAA1522-002	ENSP00000383851	KIAA1522 [Source:HGNC Symbol;Acc:29301]	+	CDS	overlapping	0	2.04096	4.67014	5.98529	5.40637	7.2384	5.05329	4.60745	3.98906	4.2142	4.29857	4.17886	5.38302	4.95885	3.98611	7.31347	6.32038	7.37072	4.75644	4.05279	6.1262
Chr1:33254401-33255750	1	33254401	33255750	NA	YARS-001	ENSP00000362576	tyrosyl-tRNA synthetase [Source:HGNC Symbol;Acc:12840]	-	CDS	overlapping	0	4.84831	4.42913	7.75852	4.40637	7.43463	6.47552	4.94849	7.43385	5.13174	3.78399	5.35943	7.71644	4.49942	3.98611	6.84479	6.80976	6.54183	4.75644	5.05279	4.31885
Chr1:33279451-33280800	1	33279451	33280800	NA	YARS-001	ENSP00000362576	tyrosyl-tRNA synthetase [Source:HGNC Symbol;Acc:12840]	-	CDS	overlapping	0	5.62592	5.67014	6.27002	5.12258	6.33985	6.94859	5.70056	7.83036	5.56784	5.0641	3.97241	6.32413	7.19986	5.41907	4.3029	5.66433	6.86376	5.24186	5.31582	6.84241
Chr1:33414151-33415350	1	33414151	33415350	NA	RNF19B-001	ENSP00000362555	ring finger protein 19B [Source:HGNC Symbol;Acc:26886]	-	CDS	overlapping	0	5.28888	4.87659	3.90437	7.09087	5.58496	7.84406	4.94849	4.72603	4.95117	4.97664	2.5939	4.54652	3.66934	4.75164	5.77003	1.61994	5.10126	4.82683	6.15713	6.01929
Chr1:33418651-33420600	1	33418651	33420600	NA	RNF19B-001	ENSP00000362555	ring finger protein 19B [Source:HGNC Symbol;Acc:26886]	-	CDS	overlapping	0	4.21088	5.42913	7.54378	8.93441	8.85798	9.25178	5.34442	6.96888	5.2922	4.14656	5.88668	5.49405	4.49942	4.66418	6.65838	6.7074	5.65146	5.4789	4.53822	5.56678
Chr1:33454201-33455700	1	33454201	33455700	NA	null					Not found	0	7.26977	4.55466	8.16393	8.51788	8.95128	8.66682	6.31527	7.80782	6.2142	5.78399	7.33806	8.33908	8.16475	5.24914	8.47282	7.96866	8.91596	7.73829	7.15713	7.17683
Chr1:33472501-33473700	1	33472501	33473700	NA	AK2-002	ENSP00000362548	adenylate kinase 2 [Source:HGNC Symbol;Acc:362]	-	CDS	upstream	2730	6.32636	4.87659	7.07429	4.76894	6.16993	6.51795	6.05812	5.81914	5.2922	5.93083	8.06638	4.1986	5.82135	5.47154	6.59048	5.66433	6.1268	5.38871	8.36022	6.07374
Chr1:33514351-33516600	1	33514351	33516600	NA	null					Not found	0	6.21088	4.67014	8.12279	8.97406	8.9629	9.90728	6.42848	9.44119	7.19402	5.67708	9.89219	8.76707	5.3574	5.12361	8.4869	6.34786	8.75743	6.29249	6.53822	5.48878
Chr1:33520351-33521850	1	33520351	33521850	NA	null					Not found	0	4.94785	5.21763	6.08657	5.12258	4.85798	6.08186	4.401	6.27857	6.47054	4.78399	6.35943	5.1986	5.30677	4.91211	5.739	4.7074	5.15189	4.95807	6.05279	5.90381
Chr1:33545851-33547650	1	33545851	33547650	NA	ADC-002	ENSP00000294517	arginine decarboxylase [Source:HGNC Symbol;Acc:29957]	+	CDS	downstream	201	7.82232	8.04652	8.71172	8.32012	8.24317	8.47013	7.82985	8.48447	8.37519	7.73153	9.12684	8.31659	8.69909	7.41907	8.3029	8.5388	8.60224	8.70597	8.07959	8.71973
Chr1:33564451-33565950	1	33564451	33565950	NA	ADC-002	ENSP00000294517	arginine decarboxylase [Source:HGNC Symbol;Acc:29957]	+	CDS	overlapping	0	4.7414	5.21763	9.73726	9.87048	9.59059	9.27979	6.53345	3.81914	5.62924	5.62049	9.25496	9.93638	4.89174	4.91211	9.58176	9.77222	9.5442	9.2956	7.55104	6.5283
Chr1:33591751-33594450	1	33591751	33594450	NA	null					Not found	0	9.29362	9.7706	9.48005	9.99776	9.75989	9.22	9.16817	9.61355	9.68813	9.00454	9.13925	9.64605	10.0937	9.23024	9.57079	9.37816	9.58853	9.6919	9.34189	9.9699
Chr1:33760801-33761850	1	33760801	33761850	NA	ZNF362-001	ENSP00000446335	zinc finger protein 362 [Source:HGNC Symbol;Acc:18079]	+	CDS	overlapping	0	5.89894	6.13963	6.97211	5.12258	3.32193	5.96402	6.37299	5.51958	8.01006	6.0641	5.07932	6.1986	7.90881	6.93097	5.57299	6.57413	5.99434	6.16243	5.86015	6.27305
Chr1:33849301-33850950	1	33849301	33850950	NA	null					Not found	0	9.81574	9.6597	6.81864	7.09087	7.54689	6.16432	9.47205	7.47735	6.56784	9.51967	8.96894	8.14855	9.15047	8.51593	7.21544	7.7074	8.64705	6.75644	8.83939	8.71973
Chr1:33923851-33924900	1	33923851	33924900	NA	null					Not found	0	4.84831	3.29163	5.52586	5.3539	6.16993	4.31632	5.22412	4.72603	5.43659	3.5616	3.5939	7.23102	4.49942	3.98611	6.85929	5.52683	8.1394	5.1894	5.12318	5.77828
Chr1:33981751-33982800	1	33981751	33982800	NA	CSMD2-001	ENSP00000241312	CUB and Sushi multiple domains 2 [Source:HGNC Symbol;Acc:19290]	-	CDS	upstream	2318	4.21088	3.77706	4.66336	0.599017	4.70044	5.96402	4.401	3.62649	9.30637	3.5616	3.85693	3.90909	5.95885	4.24914	4.12233	3.42729	4.2008	4.75644	3.05279	5.01929
Chr1:34026001-34027050	1	34026001	34027050	NA	CSMD2-001	ENSP00000241312	CUB and Sushi multiple domains 2 [Source:HGNC Symbol;Acc:19290]	-	CDS	overlapping	0	4.62592	3.77706	4.84778	0.599017	3.45943	6.16432	2.28553	3.14106	4.36621	2.5616	1.85693	3.73916	3.66934	4.57107	3.67487	3.42729	1.87887	3.24186	2.73086	5.48878
Chr1:34051501-34052400	1	34051501	34052400	NA	CSMD2-001	ENSP00000241312	CUB and Sushi multiple domains 2 [Source:HGNC Symbol;Acc:19290]	-	CDS	overlapping	0	3.62592	2.55466	5.45186	2.18398	2	4.40943	4.87049	3.14106	3.62924	3.5616	0.271968	2.32413	3.82135	3.47154	2.8004	2.2049	0.293905	4.43451	2.31582	4.1262
Chr1:34090201-34091250	1	34090201	34091250	NA	CSMD2-001	ENSP00000241312	CUB and Sushi multiple domains 2 [Source:HGNC Symbol;Acc:19290]	-	CDS	overlapping	0	3.36288	3.55466	5.63019	0.599017	3.80735	4.86886	4.02249	3.14106	4.50371	2.5616	4.91582	3.06109	4.30677	3.98611	2.8004	4.42729	3.10126	4.01947	4.53822	5.40631
Chr1:34228651-34229700	1	34228651	34229700	NA	CSMD2-001	ENSP00000241312	CUB and Sushi multiple domains 2 [Source:HGNC Symbol;Acc:19290]	-	CDS	overlapping	0	3.62592	4.9697	6.64687	4.40637	2.32193	8.87296	4.50792	6.14106	5.62924	4.43607	1.85693	3.90909	6.45362	2.24914	2.21544	5.26379	3.46383	5.07836	6.08841	4.77828
Chr1:34391101-34391700	1	34391101	34391700	NA	CSMD2-001	ENSP00000241312	CUB and Sushi multiple domains 2 [Source:HGNC Symbol;Acc:19290]	-	CDS	overlapping	0	3.36288	5.77706	6.15812	1.59902	1	4.40943	5.02249	8.21145	4.62924	6.10592	4.91582	2.32413	6.11413	4.91211	2.8004	2.61994	2.29391	4.68244	7.97879	4.1262
Chr1:34479451-34480050	1	34479451	34480050	NA	CSMD2-001	ENSP00000241312	CUB and Sushi multiple domains 2 [Source:HGNC Symbol;Acc:19290]	-	CDS	overlapping	0	2.04096	2.55466	5.48933	2.59902	2.32193	3.73136	3.70056	3.4041	9.38413	3.97664	0.271968	0.739163	4.58688	3.47154	0.215436	3.78986	0.293905	4.13495	3.05279	4.48878
Chr1:34665151-34666350	1	34665151	34666350	NA	C1orf94-002	ENSP00000435634	chromosome 1 open reading frame 94 [Source:HGNC Symbol;Acc:28250]	+	CDS	overlapping	0	4.36288	4.55466	7.67966	4.50591	3	7.30425	4.60745	5.46299	5.13174	4.43607	3.44189	0.739163	3.95885	4.66418	2.21544	6.99498	0.293905	4.3414	4.19029	5.84241
Chr1:35055451-35056500	1	35055451	35056500	NA	null					Not found	0	4.21088	4.87659	5.56148	2.18398	2	2.99439	5.22412	3.81914	5.90226	0.976638	1.85693	2.32413	4.30677	3.24914	2.53736	4.42729	0.293905	4.43451	3.31582	6.27305
Chr1:35063401-35064150	1	35063401	35064150	NA	null					Not found	0	2.62592	3.77706	5.20393	2.18398	0	2.73136	3.50792	3.98906	5.99847	4.43607	3.07932	0.739163	2.08438	2.98611	2.21544	3.2049	1.87887	3.89394	4.05279	4.64078
Chr1:35161501-35162550	1	35161501	35162550	NA	null					Not found	0	3.04096	3.55466	4.78889	2.59902	3.70044	2.73136	4.70056	3.14106	7.11037	2.5616	2.27197	2.32413	3.66934	3.98611	4.21544	5.07937	0.293905	4.01947	3.05279	6.87344
Chr1:35207851-35209050	1	35207851	35209050	NA	C1orf212-001	ENSP00000429902	chromosome 1 open reading frame 212 [Source:HGNC Symbol;Acc:25154]	-	CDS	overlapping	0	4.21088	4.29163	5.59625	2.18398	4.16993	4.21679	3.87049	4.14106	6.7722	5.5616	3.07932	3.06109	5.30677	4.36462	4.38536	5.37482	2.61583	3.75644	5.53822	6.71117
Chr1:35227201-35230800	1	35227201	35230800	NA	C1orf212-001	ENSP00000429902	chromosome 1 open reading frame 212 [Source:HGNC Symbol;Acc:25154]	-	CDS	overlapping	0	5.28888	4.87659	7.41338	2.59902	6.93074	5.16432	5.91002	5.14106	5.62924	4.88353	4.5199	4.82663	5.3574	4.98611	6.57299	5.82939	4.2008	5.43451	5.4313	6.84241
Chr1:35317801-35319150	1	35317801	35319150	NA	C1orf212-001	ENSP00000429902	chromosome 1 open reading frame 212 [Source:HGNC Symbol;Acc:25154]	-	CDS	overlapping	0	4.21088	4.55466	5.69578	3.40637	5.16993	5.26741	5.09288	2.81914	6.50371	5.5002	4.66429	7.1142	4.89174	3.98611	4.739	4.07937	6.27118	5.07836	5.31582	4.64078
Chr1:35324251-35326050	1	35324251	35326050	NA	C1orf212-001	ENSP00000429902	chromosome 1 open reading frame 212 [Source:HGNC Symbol;Acc:25154]	-	CDS	downstream	2673	9.11777	9.54713	8.96548	9.12649	9.02514	9.02414	9.11842	9.03345	9.52809	9.31649	9.44689	9.00126	9.40029	9.04789	8.93654	9.13957	8.93415	9.68006	8.72522	9.33566
Chr1:35350351-35350950	1	35350351	35350950	NA	DLGAP3-202	ENSP00000445209	discs, large (Drosophila) homolog-associated protein 3 [Source:HGNC Symbol;Acc:30368]	-	CDS	overlapping	0	4.04096	2.55466	3.52586	0.599017	3.45943	1.99439	2.70056	2.81914	4.04428	3.78399	1.27197	3.06109	2.49942	3.98611	2.21544	0.619936	0.293905	3.60443	2.73086	4.90381
Chr1:35449951-35451750	1	35449951	35451750	NA	ZMYM6NB-001	ENSP00000362435	ZMYM6 neighbor [Source:HGNC Symbol;Acc:40021]	-	CDS	overlapping	0	9.83212	9.46155	9.86214	9.71536	9.31967	9.7823	9.11419	9.06706	10.0887	9.58027	9.60512	9.87615	10.0975	9.82153	9.5215	10.0357	9.8408	9.65368	9.79695	9.68954
Chr1:35496301-35498400	1	35496301	35498400	NA	ZMYM6-006	ENSP00000421752	zinc finger, MYM-type 6 [Source:HGNC Symbol;Acc:13050]	-	CDS	downstream	61	9.58785	9.64918	9.40605	9.71536	9.44501	9.39527	9.47205	9.54024	9.62548	9.19581	9.60736	9.70495	9.77322	9.50653	9.4681	9.44648	9.45125	9.46793	9.52528	9.4584
Chr1:35544451-35545800	1	35544451	35545800	NA	null					Not found	0	9.26012	9.72792	9.22907	9.38038	9.0607	9.29207	9.02699	9.08592	9.92386	9.24343	9.51752	9.36852	9.84372	9.23783	9.04516	9.15132	8.96279	9.40605	9.16549	9.74512
Chr1:35667301-35668350	1	35667301	35668350	NA	null					Not found	0	4.7414	6.46155	4.84778	5.40637	4.90689	3.57936	6.6313	4.72603	6.50371	7.78399	0.271968	5.90909	6.45362	6.44554	5.12233	2.2049	5.68622	7.1894	5.58884	8.0331
Chr1:35733601-35735850	1	35733601	35735850	NA	ZMYM4-001	ENSP00000322915	zinc finger, MYM-type 4 [Source:HGNC Symbol;Acc:13055]	+	CDS	overlapping	0	9.85474	10.1521	9.4847	9.62692	9.33316	9.26741	9.72847	9.35441	9.72023	9.78399	9.5984	9.28606	9.93821	9.77009	9.49389	9.61146	9.17349	9.7083	9.2931	10.11
Chr1:35753101-35755050	1	35753101	35755050	NA	ZMYM4-001	ENSP00000322915	zinc finger, MYM-type 4 [Source:HGNC Symbol;Acc:13055]	+	CDS	overlapping	0	4.7414	4.9697	8.48933	9.17645	8.87037	7.25492	5.50792	3.98906	5.79916	5.83462	3.07932	9.28606	6.05401	5.66418	8.11025	5.97749	9.00126	4.82683	7.08841	6.1262
Chr1:36022201-36024750	1	36022201	36024750	NA	KIAA0319L-015	ENSP00000420742	KIAA0319-like [Source:HGNC Symbol;Acc:30071]	-	CDS	overlapping	0	10.444	10.8073	10.2767	10.184	9.99435	10.2455	10.3606	10.4283	10.5017	10.5858	10.479	10.2666	10.6079	10.3331	10.2585	10.3681	10.2554	10.311	10.4296	10.7219
Chr1:36038251-36040500	1	36038251	36040500	NA	TFAP2E-001	ENSP00000362332	transcription factor AP-2 epsilon (activating enhancer binding protein 2 epsilon) [Source:HGNC Symbol;Acc:30774]	+	CDS	overlapping	0	7.51669	6.46155	7.55266	2.92094	5.67243	6.71321	6.6313	7.22853	4.85163	5.5616	8.2832	5.38302	7.29384	6.52216	7.09808	6.68603	5.57931	6.3414	6.15713	8.97706
Chr1:36183301-36185250	1	36183301	36185250	NA	CLSPN-001	ENSP00000251195	claspin [Source:HGNC Symbol;Acc:19715]	-	CDS	upstream	1242	9.86114	10.6279	9.85856	10.0889	9.27612	9.66682	9.47535	9.81066	10.194	10.134	10.1592	9.16543	10.0636	9.62708	9.58394	10.0916	9.61809	9.83325	9.42783	10.2106
Chr1:36234451-36236250	1	36234451	36236250	NA	CLSPN-001	ENSP00000251195	claspin [Source:HGNC Symbol;Acc:19715]	-	CDS	overlapping	0	9.96577	9.75106	9.40605	8.9697	9.14466	9.34017	9.50469	8.79068	10.1736	9.48443	9.87188	8.99655	9.83481	9.70858	9.39783	9.48102	8.43856	9.54564	8.93543	9.56678
Chr1:36348001-36350100	1	36348001	36350100	NA	EIF2C1-002	ENSP00000362300	eukaryotic translation initiation factor 2C, 1 [Source:HGNC Symbol;Acc:3262]	+	CDS	overlapping	0	9.35837	9.64566	8.72749	8.3672	8.39232	8.62375	8.95795	8.8415	9.81906	9.1714	9.43184	7.4396	9.439	9.20721	8.70328	8.8391	8.14565	8.67768	8.53176	9.401
Chr1:36395251-36397800	1	36395251	36397800	NA	EIF2C3-001	ENSP00000317425	eukaryotic translation initiation factor 2C, 3 [Source:HGNC Symbol;Acc:18421]	+	CDS	overlapping	0	10.2504	10.3599	9.75467	9.7283	9.77643	9.98118	9.91245	10.1789	10.4387	10.1213	10.1299	9.47725	10.2324	10.2826	9.75847	10.1138	9.66894	9.78986	9.8446	10.3384
Chr1:36473851-36474750	1	36473851	36474750	NA	EIF2C3-003	ENSP00000362287	eukaryotic translation initiation factor 2C, 3 [Source:HGNC Symbol;Acc:18421]	+	CDS	overlapping	0	4.04096	3.29163	4.45186	8.32012	7.69349	4.80175	4.60745	2.81914	3.04428	2.5616	0.271968	2.32413	4.58688	2.98611	7.59914	3.61994	3.75334	5.56379	3.73086	4.1262
Chr1:36500101-36500850	1	36500101	36500850	NA	EIF2C3-003	ENSP00000362287	eukaryotic translation initiation factor 2C, 3 [Source:HGNC Symbol;Acc:18421]	+	CDS	overlapping	0	3.36288	3.29163	4.66336	5.80847	3.32193	3.73136	4.94849	3.81914	3.85163	4.78399	1.27197	4.90909	4.30677	3.98611	2.8004	2.2049	3.75334	3.60443	5.58884	5.48878
Chr1:36553801-36555600	1	36553801	36555600	NA	ADPRHL2-001	ENSP00000362273	ADP-ribosylhydrolase like 2 [Source:HGNC Symbol;Acc:21304]	+	CDS	overlapping	0	9.87068	10.0492	9.67357	9.56768	9.37721	9.41505	9.8221	9.60377	10.1104	9.684	10.0016	9.14004	10.0347	10.0436	9.32134	9.93055	9.31627	9.47068	9.78885	10.4635
Chr1:36564751-36566400	1	36564751	36566400	NA	COL8A2-001	ENSP00000305913	collagen, type VIII, alpha 2 [Source:HGNC Symbol;Acc:2216]	-	CDS	overlapping	0	6.04096	6.67014	7.21516	4.99133	5.49185	7.22961	6.22412	6.14106	8.02156	5.83462	7.68136	5.82663	7.93405	6.81393	5.6417	6.50258	5.99434	6.13495	6.40329	8.38494
Chr1:36614251-36617550	1	36614251	36617550	NA	TRAPPC3-001	ENSP00000362261	trafficking protein particle complex 3 [Source:HGNC Symbol;Acc:19942]	-	CDS	overlapping	0	10.5645	10.2894	10.6664	10.8278	10.4979	10.3268	10.3516	10.3447	11.4106	10.0319	10.6696	10.6491	11.0598	10.1277	10.346	10.8655	10.6181	10.0474	10.6181	10.6019
Chr1:36620401-36623250	1	36620401	36623250	NA	MAP7D1-001	ENSP00000320228	MAP7 domain containing 1 [Source:HGNC Symbol;Acc:25514]	+	CDS	overlapping	0	11.0268	11.2294	10.7489	10.9085	10.4388	10.7866	11.0123	10.7964	11.5825	11.0224	10.6951	10.6535	11.115	10.9725	10.6269	11.1158	10.5874	10.8671	11.0774	11.3632
Chr1:36653101-36654600	1	36653101	36654600	NA	null					Not found	0	7.01824	8.54713	8.81864	8.90736	8.41363	8.47552	7.8195	6.02859	7.50371	7.0641	8.8494	8.29375	8.13604	7.09045	7.96363	8.57994	8.68192	7.52197	8.35291	8.00535
Chr1:36682951-36683700	1	36682951	36683700	NA	null					Not found	0	3.84831	3.29163	5.69578	3.92094	3.90689	4.31632	4.02249	4.51958	4.2142	4.14656	2.27197	4.32413	5.25431	2.98611	4.02279	1.61994	4.61583	5.3414	3.73086	6.07374
Chr1:36688801-36691500	1	36688801	36691500	NA	null					Not found	0	10.6146	10.6225	10.2456	10.3999	10.062	10.3622	10.3677	10.4246	10.3572	10.3582	10.1268	10.1033	10.5134	10.5112	10.1223	10.1257	10.175	10.0195	10.5542	10.4456
Chr1:36713551-36714750	1	36713551	36714750	NA	null					Not found	0	4.62592	4.29163	8.17547	8.29946	8.53138	8.73586	4.401	8.46299	4.2142	5.14656	5.02686	7.93884	5.66934	4.75164	6.38536	6.90534	7.86376	5.24186	5.37472	4.1262
Chr1:36765151-36766950	1	36765151	36766950	NA	THRAP3-001	ENSP00000346634	thyroid hormone receptor associated protein 3 [Source:HGNC Symbol;Acc:22964]	+	CDS	overlapping	0	6.32636	5.82768	8.69978	8.24287	7.96	6.76698	5.87049	7.88522	6.47054	5.5002	7.7066	6.49405	6.49942	5.61838	8.4869	7.07937	6.7033	5.82683	7.34557	5.77828
Chr1:36808051-36809400	1	36808051	36809400	NA	STK40-001	ENSP00000362221	serine/threonine kinase 40 [Source:HGNC Symbol;Acc:21373]	-	CDS	overlapping	0	6.32636	5.72459	8.06811	7.78884	8.89785	8.67622	6.55854	6.70178	7.48722	6.10592	8.28878	8.68168	5.25431	5.41907	7.48222	8.27099	8.43856	6.10693	5.77526	5.84241
Chr1:36815851-36817800	1	36815851	36817800	NA	STK40-001	ENSP00000362221	serine/threonine kinase 40 [Source:HGNC Symbol;Acc:21373]	-	CDS	overlapping	0	9.73444	8.18887	10.3999	10.5834	10.2515	10.2232	10.0315	9.55046	10.5017	9.58027	8.72729	10.5705	10.2493	9.62128	10.1328	10.7074	10.2023	9.30179	9.47905	9.28463
Chr1:36838651-36841350	1	36838651	36841350	NA	null					Not found	0	11.2406	9.97813	10.65	10.8728	10.4645	10.625	10.9568	10.7617	10.9146	10.9893	10.7436	10.4009	11.0337	10.6343	10.6152	10.8048	10.6203	10.8816	11.0369	11.021
Chr1:36849901-36853650	1	36849901	36853650	NA	null					Not found	0	11.1728	10.6891	11.0471	11.2617	10.7682	11.088	11.1783	11.3861	11.3526	11.1441	11.0857	10.4186	11.2392	10.8063	10.8905	11.0926	10.9476	10.8193	11.1371	11.1084
Chr1:36862351-36864300	1	36862351	36864300	NA	LSM10-001	ENSP00000319341	LSM10, U7 small nuclear RNA associated [Source:HGNC Symbol;Acc:17562]	-	CDS	downstream	2621	9.90514	9.84622	9.36883	9.17266	9.31515	9.34607	9.7986	9.88791	9.73776	9.94242	9.85317	8.76707	9.92778	9.59492	9.27072	9.52683	9.07198	9.46241	9.29692	9.68954
Chr1:36865951-36868050	1	36865951	36868050	NA	null					Not found	0	6.04096	6.2551	5.75852	4.29946	5.42626	9.13053	6.45545	8.58732	6.53613	5.83462	10.3448	8.77259	8.08438	6.02173	4.91588	7.78986	9.03874	6.9891	8.95486	7.56678
Chr1:36882151-36883200	1	36882151	36883200	NA	OSCP1-006	ENSP00000426981	organic solute carrier partner 1 [Source:HGNC Symbol;Acc:29971]	-	CDS	overlapping	0	3.36288	5.36202	4.11082	3.59902	4.58496	3.73136	4.70056	4.14106	4.2142	3.5616	4.7314	3.54652	4.95885	4.75164	4.60775	4.7074	3.29391	5.07836	3.73086	6.71117
Chr1:36886051-36887250	1	36886051	36887250	NA	OSCP1-006	ENSP00000426981	organic solute carrier partner 1 [Source:HGNC Symbol;Acc:29971]	-	CDS	overlapping	0	6.79584	6.36202	6.83328	6.66511	6.52356	6.53871	6.78803	6.4041	7.17356	6.83462	6.02686	6.23102	7.03858	7.12361	5.8004	6.76968	6.98041	7.93435	5.81833	7.22574
Chr1:36901951-36903300	1	36901951	36903300	NA	OSCP1-002	ENSP00000235532	organic solute carrier partner 1 [Source:HGNC Symbol;Acc:29971]	-	CDS	overlapping	0	4.36288	4.9697	5.15812	1.59902	3.45943	4.49689	5.22412	4.51958	5.2922	2.5616	1.85693	3.90909	4.30677	3.83411	3.38536	3.94186	2.87887	4.75644	0.730862	5.01929
Chr1:36915451-36916950	1	36915451	36916950	NA	OSCP1-002	ENSP00000235532	organic solute carrier partner 1 [Source:HGNC Symbol;Acc:29971]	-	CDS	overlapping	0	9.25041	9.16446	8.99509	8.88442	8.49985	9.52577	9.25515	9.64568	10.0832	9.35602	9.53875	8.74479	9.63897	8.8785	8.98031	9.34104	9.08507	9.35635	9.136	9.54767
Chr1:36928801-36931200	1	36928801	36931200	NA	MRPS15-001	ENSP00000362208	mitochondrial ribosomal protein S15 [Source:HGNC Symbol;Acc:14504]	-	CDS	overlapping	0	9.78242	10.4933	9.39622	9.24287	9.26913	9.614	9.86295	10.132	10.332	9.90442	10.1315	9.21894	10.1981	10.1154	9.57519	9.56538	9.13626	10.0945	9.58573	10.5283
Chr1:37115851-37116750	1	37115851	37116750	NA	null					Not found	0	4.21088	4.42913	1.78889	2.18398	2.58496	1.99439	4.02249	2.81914	5.56784	3.97664	2.5939	2.73916	3.49942	3.83411	2.53736	0.619936	3.10126	4.68244	2.73086	6.17683
Chr1:37156501-37157850	1	37156501	37157850	NA	null					Not found	0	4.50039	4.13963	2.78889	1.59902	3.16992	3.21679	4.78803	5.3427	7.48722	3.5616	2.85693	4.06109	4.30677	3.83411	0.215436	3.42729	0.293905	3.01947	4.19029	6.1262
Chr1:37168951-37170000	1	37168951	37170000	NA	null					Not found	0	5.12842	6.49326	3.90437	2.92094	2.32193	3.21679	5.74496	5.62649	7.41932	6.46849	3.07932	0.739163	6.17184	6.52216	3.38536	3.42729	1.87887	7.2674	5.63775	8.31885
Chr1:37899751-37900500	1	37899751	37900500	NA	null					Not found	0	5.68481	4.29163	4.11082	2.59902	2	3.86886	6.45545	4.27857	7.95117	4.5616	2.85693	3.32413	4.89174	6.61838	2.53736	0.619936	2.29391	4.24186	4.90079	6.84241
Chr1:37917001-37918500	1	37917001	37918500	NA	null					Not found	0	3.84831	4.77706	5.45186	3.76894	5.67243	5.86886	6.37299	5.98906	3.85163	3.5616	5.02686	5.4396	4.58688	4.75164	5.07342	4.86786	4.54183	5.43451	5.12318	6.60425
Chr1:37936651-37938750	1	37936651	37938750	NA	ZC3H12A-001	ENSP00000362179	zinc finger CCCH-type containing 12A [Source:HGNC Symbol;Acc:26259]	+	CDS	downstream	2348	9.43327	7.52429	9.94708	10.2977	9.6987	8.75816	9.68356	9.16343	10.1813	8.97099	8.63829	10.1904	8.30677	9.31164	10.095	10.2124	10.1125	9.25149	9.64674	8.28463
Chr1:37944151-37947000	1	37944151	37947000	NA	ZC3H12A-001	ENSP00000362179	zinc finger CCCH-type containing 12A [Source:HGNC Symbol;Acc:26259]	+	CDS	overlapping	0	6.62592	5.9239	10.2901	10.3787	9.77149	9.78664	8.30789	9.38899	7.06664	6.02103	9.67285	10.0967	6.70887	6.49707	10.0276	10.3798	9.78576	7.44574	8.34557	7.60425
Chr1:37979101-37981050	1	37979101	37981050	NA	MEAF6-008	ENSP00000362164	MYST/Esa1-associated factor 6 [Source:HGNC Symbol;Acc:25674]	-	CDS	overlapping	0	9.81245	10.0964	9.42551	9.5029	9.07948	9.7515	9.92215	9.65203	10.0749	9.87448	9.90678	9.04294	9.85697	9.94263	9.48923	9.74406	9.41285	9.72222	9.76429	9.90005
Chr1:37999201-38000850	1	37999201	38000850	NA	SNIP1-001	ENSP00000296215	Smad nuclear interacting protein 1 [Source:HGNC Symbol;Acc:30587]	-	CDS	upstream	2499	5.04096	4.29163	8.11082	8.75889	8.45533	7.35194	5.22412	8.18546	5.85163	3.29857	3.97241	7.26273	4.95885	5.0565	9.0066	6.76968	7.51307	5.29249	6.86015	5.56678
Chr1:38019301-38020650	1	38019301	38020650	NA	SNIP1-001	ENSP00000296215	Smad nuclear interacting protein 1 [Source:HGNC Symbol;Acc:30587]	-	CDS	overlapping	0	8.71338	8.77706	8.75852	8.67583	8.62205	9.01676	8.35161	8.6005	8.4789	8.5158	9.11746	8.23102	8.88312	8.893	8.64589	8.6423	7.93776	8.80083	8.47233	8.64078
Chr1:38027101-38028150	1	38027101	38028150	NA	DNALI1-001	ENSP00000296218	dynein, axonemal, light intermediate chain 1 [Source:HGNC Symbol;Acc:14353]	+	CDS	overlapping	0	4.36288	4.67014	4.37385	2.92094	4.39232	5.90128	5.02249	3.62649	4.50371	4.97664	3.44189	4.1986	4.89174	4.57107	5.07342	4.07937	3.10126	5.1894	4.4313	5.96271
Chr1:38041801-38043000	1	38041801	38043000	NA	GNL2-001	ENSP00000362153	guanine nucleotide binding protein-like 2 (nucleolar) [Source:HGNC Symbol;Acc:29925]	-	CDS	overlapping	0	4.36288	4.13963	6.39375	7.04196	6.02237	7.44285	4.28553	5.9066	4.2142	3.78399	5.85693	7.52052	2.49942	3.83411	8.83015	5.57413	6.96633	4.13495	4.81832	4.90381
Chr1:38060701-38062350	1	38060701	38062350	NA	GNL2-001	ENSP00000362153	guanine nucleotide binding protein-like 2 (nucleolar) [Source:HGNC Symbol;Acc:29925]	-	CDS	overlapping	0	8.80251	9.10925	8.7392	8.4128	8.44294	9.25492	8.66635	9.12292	8.99847	8.50802	8.69823	8.00595	8.79404	8.51593	8.67896	8.50258	8.55129	8.98526	8.6616	8.44813
Chr1:38147701-38148750	1	38147701	38148750	NA	C1orf109-001	ENSP00000350704	chromosome 1 open reading frame 109 [Source:HGNC Symbol;Acc:26039]	-	CDS	upstream	45	4.84831	4.55466	4.95882	2.59902	4.16993	5.40943	3.87049	4.98906	6.04428	4.97664	4.17886	4.98709	5.14328	4.83411	4.12233	3.42729	4.46383	4.89394	4.73086	4.48878
Chr1:38204551-38205750	1	38204551	38205750	NA	EPHA10-202	ENSP00000397746	EPH receptor A10 [Source:HGNC Symbol;Acc:19987]	-	CDS	overlapping	0	2.62592	3.55466	2.78889	0.599017	3.58496	5.36363	3.70056	2.4041	4.62924	3.29857	0.271968	0.739163	3.30677	3.66418	2.53736	2.94186	0.293905	3.75644	3.05279	4.48878
Chr1:38324401-38326800	1	38324401	38326800	NA	MTF1-001	ENSP00000362127	metal-regulatory transcription factor 1 [Source:HGNC Symbol;Acc:7428]	-	CDS	downstream	1071	10.0716	10.2081	9.63647	8.99562	9.47776	9.99627	9.99977	10.0335	10.3343	9.62769	9.93018	8.96316	9.9568	9.77009	9.64589	9.81223	9.2008	9.83325	9.65864	9.78237
Chr1:38330701-38332500	1	38330701	38332500	NA	INPP5B-002	ENSP00000362118	inositol polyphosphate-5-phosphatase, 75kDa [Source:HGNC Symbol;Acc:6077]	-	CDS	overlapping	0	5.04096	5.21763	6.89043	4.59902	7.3837	6.71321	5.401	9.48802	5.50371	4.43607	4.27197	5.73916	4.74735	4.83411	4.02279	5.1435	5.2481	5.07836	5.53822	4.90381
Chr1:38412001-38413500	1	38412001	38413500	NA	INPP5B-003	ENSP00000362117	inositol polyphosphate-5-phosphatase, 75kDa [Source:HGNC Symbol;Acc:6077]	-	CDS	downstream	21	9.0125	8.81519	9.13762	8.31326	8.59619	8.96018	8.86043	8.63292	7.02156	9.1213	9.34075	9.51065	9.87446	9.21108	8.24334	8.47792	9.53946	9.47343	8.81301	9.70255
Chr1:38454901-38456550	1	38454901	38456550	NA	SF3A3-001	ENSP00000362110	splicing factor 3a, subunit 3, 60kDa [Source:HGNC Symbol;Acc:10767]	-	CDS	overlapping	0	9.50039	9.58441	9.29669	8.95657	8.97728	9.07121	9.2628	9.10454	9.53613	8.91915	9.85128	8.96316	9.65929	9.30443	9.08272	9.38481	8.87511	9.21587	9.11457	9.18304
Chr1:38464501-38467800	1	38464501	38467800	NA	FHL3-001	ENSP00000362107	four and a half LIM domains 3 [Source:HGNC Symbol;Acc:3704]	-	CDS	overlapping	0	11.0125	10.2871	10.6746	9.74876	10.0293	10.7018	10.7747	8.39656	8.31106	9.77105	10.6898	10.7795	11.318	11.0883	10.2378	10.7899	10.7827	10.3278	10.4485	10.1262
Chr1:38477551-38479350	1	38477551	38479350	NA	UTP11L-001	ENSP00000362105	UTP11-like, U3 small nucleolar ribonucleoprotein, (yeast) [Source:HGNC Symbol;Acc:24329]	+	CDS	overlapping	0	9.5917	9.80575	9.14351	8.99562	9.00843	9.24232	9.49173	9.36217	9.67727	9.48046	9.7916	9.11854	9.74972	9.6557	9.25161	9.03779	8.95924	9.59438	9.136	9.41161
Chr1:38529451-38530800	1	38529451	38530800	NA	null					Not found	0	5.36288	7.37909	7.27002	5.68648	7.07682	8.03148	8.50146	7.38899	3.85163	8.28042	8.77579	4.82663	6.60794	6.93097	8.27613	7.56245	4.54183	8.24186	8.99765	8.77828
Chr1:38603851-38604900	1	38603851	38604900	NA	null					Not found	0	7.76888	5.82768	7.14644	5.59902	6.10852	6.71321	8.14351	7.50564	7.04428	7.08516	0.271968	6.02457	8.48241	8.46508	7.51922	7.68603	5.99434	8.00436	6.94032	8.20149
Chr1:39196351-39197400	1	39196351	39197400	NA	null					Not found	0	4.84831	3.9697	3.20393	0.599017	1.58496	3.57936	6.401	4.51958	4.2142	4.88353	0.271968	3.06109	4.82135	4.47154	3.67487	2.94186	3.61583	5.82683	4.31582	6.6764
Chr1:39251701-39252900	1	39251701	39252900	NA	null					Not found	0	4.84831	3.55466	4.84778	2.92094	5.2854	3.57936	6.45545	5.21145	3.85163	3.78399	2.27197	2.32413	3.95885	3.47154	4.3029	4.86786	0.293905	6.36525	5.53822	7.36324
Chr1:39300601-39301500	1	39300601	39301500	NA	RRAGC-001	ENSP00000362092	Ras-related GTP binding C [Source:HGNC Symbol;Acc:19902]	-	CDS	upstream	3725	5.04096	2.55466	3.20393	2.18398	3.16992	3.99439	3.70056	3.14106	3.85163	4.14656	0.271968	3.32413	4.58688	4.36462	3.02279	0.619936	0.293905	5.07836	3.05279	5.40631
Chr1:39324301-39326250	1	39324301	39326250	NA	RRAGC-001	ENSP00000362092	Ras-related GTP binding C [Source:HGNC Symbol;Acc:19902]	-	CDS	overlapping	0	9.26977	9.62791	9.34859	9.30982	9.02791	9.14752	9.79596	9.76458	9.93909	9.05879	9.88484	8.04294	9.77088	9.44226	9.51922	9.58572	9.16118	9.02697	9.41736	9.54767
Chr1:39338251-39339900	1	39338251	39339900	NA	MYCBP-001	ENSP00000380702	c-myc binding protein [Source:HGNC Symbol;Acc:7554]	-	CDS	overlapping	0	8.85474	9.33602	9.10781	8.16887	8.3837	8.99063	9.30789	8.15005	9.03863	8.78399	9.46673	7.62181	8.9792	8.44554	8.9569	8.95533	8.29953	8.9814	8.78614	8.4686
Chr1:39423901-39426300	1	39423901	39426300	NA	null					Not found	0	5.94785	6.05716	6.48933	7.05845	7.75489	5.76698	6.65476	5.4041	4.74472	4.5616	3.7314	5.82663	5.85697	4.66418	6.69117	5.07937	5.38137	7.06387	5.25442	6.6764
Chr1:39450901-39451650	1	39450901	39451650	NA	null					Not found	0	4.36288	3.9697	3.52586	3.59902	4.64386	4.86886	5.09288	3.14106	2.04428	3.78399	0.271968	4.32413	3.95885	3.24914	5.12233	0.619936	5.90861	4.13495	4.4313	4.48878
Chr1:39491401-39493350	1	39491401	39493350	NA	NDUFS5-001	ENSP00000362060	NADH dehydrogenase (ubiquinone) Fe-S protein 5, 15kDa (NADH-coenzyme Q reductase) [Source:HGNC Symbol;Acc:7712]	+	CDS	downstream	1047	10.2674	10.4209	9.72356	9.93217	9.62936	9.84406	10.6328	10.0015	9.75852	10.2941	9.96546	9.27444	10.348	10.2283	9.89316	9.87968	9.32457	9.90821	10.007	10.0936
Chr1:39541351-39542550	1	39541351	39542550	NA	null					Not found	0	5.04096	5.05716	5.93185	4.40637	4.85798	7.39812	5.82985	5.94842	4.95117	4.5616	4.17886	5.82663	6.22734	4.47154	4.21544	4.7074	5.96633	5.43451	3.90079	6.99128
Chr1:39557701-39558600	1	39557701	39558600	NA	MACF1-203	ENSP00000386085	microtubule-actin crosslinking factor 1 [Source:HGNC Symbol;Acc:13664]	+	CDS	overlapping	0	5.36288	5.05716	5.63019	3.59902	4.24793	5.65736	5.87049	2.81914	4.36621	5.0641	3.27197	2.32413	6.72824	4.66418	5.50084	4.07937	3.99434	5.89394	5.31582	7.34122
Chr1:39563851-39564900	1	39563851	39564900	NA	MACF1-203	ENSP00000386085	microtubule-actin crosslinking factor 1 [Source:HGNC Symbol;Acc:13664]	+	CDS	overlapping	0	7.43327	6.21763	7.73531	6.38038	7.56224	8.31632	8.52711	6.70178	7.78574	7.90738	3.97241	5.32413	8.35117	7.94031	5.53736	7.66433	6.02183	6.80955	8.00699	7.5283
Chr1:39607951-39609000	1	39607951	39609000	NA	MACF1-203	ENSP00000386085	microtubule-actin crosslinking factor 1 [Source:HGNC Symbol;Acc:13664]	+	CDS	overlapping	0	5.79584	5.42913	7.04942	7.49383	4.80735	5.31632	6.34442	5.86353	5.43659	4.14656	2.5939	8.77259	7.66934	6.02173	4.8004	6.37482	8.91229	6.01947	6.22271	7.64078
Chr1:39624451-39625650	1	39624451	39625650	NA	MACF1-203	ENSP00000386085	microtubule-actin crosslinking factor 1 [Source:HGNC Symbol;Acc:13664]	+	CDS	overlapping	0	6.7414	5.67014	8.72749	9.33034	8.3443	8.13735	8.10995	6.17669	6.04428	5.43607	6.24925	7.42566	8.13604	6.18774	8.76618	8.06288	7.76964	7.52197	7.78614	6.60425
Chr1:39648601-39650700	1	39648601	39650700	NA	MACF1-203	ENSP00000386085	microtubule-actin crosslinking factor 1 [Source:HGNC Symbol;Acc:13664]	+	CDS	overlapping	0	9.59554	8.62075	9.2565	9.80603	9.17243	7.72231	9.82727	7.738	6.17356	7.94242	6.7314	8.55295	8.8123	6.73027	9.55306	8.35465	8.59769	8.36525	9.49905	7.82664
Chr1:39656851-39659550	1	39656851	39659550	NA	MACF1-203	ENSP00000386085	microtubule-actin crosslinking factor 1 [Source:HGNC Symbol;Acc:13664]	+	CDS	overlapping	0	9.95385	8.73125	10.3268	10.4663	9.87037	9.73136	10.5523	8.94842	7.38413	9.59135	9.62732	10.3685	9.86136	8.77271	10.0531	9.74922	10.3893	8.99293	9.80232	8.96271
Chr1:39723901-39725100	1	39723901	39725100	NA	MACF1-203	ENSP00000386085	microtubule-actin crosslinking factor 1 [Source:HGNC Symbol;Acc:13664]	+	CDS	overlapping	0	6.28888	6.58441	7.03682	5.99133	5.78136	5.73136	7.58321	5.81914	5.99847	6.10592	5.40125	5.54652	6.8032	5.30804	5.67487	6.26379	6.27118	6.04922	6.68506	6.44813
Chr1:39852751-39853950	1	39852751	39853950	NA	MACF1-028	ENSP00000362006	microtubule-actin crosslinking factor 1 [Source:HGNC Symbol;Acc:13664]	+	CDS	overlapping	0	5.68481	5.49326	7.91817	7.18398	7.8392	7.25492	7.22412	7.14106	5.13174	6.0641	4.27197	8.25486	6.72824	6.02173	6.9968	7.3614	8.23642	5.4789	6.63775	6.56678
Chr1:39862951-39865200	1	39862951	39865200	NA	MACF1-028	ENSP00000362006	microtubule-actin crosslinking factor 1 [Source:HGNC Symbol;Acc:13664]	+	CDS	overlapping	0	9.82232	9.40849	9.98529	10.1304	9.72622	8.53871	10.5755	9.89595	5.68813	9.95678	8.69403	9.87615	10.4638	10.2697	9.77959	9.15909	10.1363	8.53254	9.98116	10.1165
Chr1:39956551-39957600	1	39956551	39957600	NA	BMP8A-001	ENSP00000327440	bone morphogenetic protein 8a [Source:HGNC Symbol;Acc:21650]	+	CDS	downstream	64	6.82232	6.58441	6.41338	4.76894	5.58496	5.36363	7.95795	7.06706	8.46213	6.62049	5.17886	4.98709	7.15763	6.893	4.02279	6.29236	4.93776	6.3887	6.37472	7.15174
Chr1:40071301-40072650	1	40071301	40072650	NA	null					Not found	0	5.7414	6.69762	6.71172	5.7283	7.2854	6.61888	7.64308	6.8415	6.92692	6.46849	6.02686	5.1986	6.17184	6.27889	7.92968	5.61994	5.46383	7.51132	6.6135	6.96271
Chr1:40074901-40075950	1	40074901	40075950	NA	null					Not found	0	3.84831	5.82768	4.29139	2.18398	3.32193	3.40943	5.82985	2.81914	5.56784	3.5616	3.5939	3.06109	4.74735	4.47154	3.38536	2.94186	3.87887	4.52197	4.53822	6.01929
Chr1:40104451-40106250	1	40104451	40106250	NA	HEYL-001	ENSP00000361943	hairy/enhancer-of-split related with YRPW motif-like [Source:HGNC Symbol;Acc:4882]	-	CDS	overlapping	0	5.28888	6.72459	4.72749	2.18398	4.75489	2.73136	7.23972	6.31099	5.13174	5.93083	5.5199	3.90909	5.40631	5.98611	0.215436	2.2049	4.81747	5.07836	6.75323	6.1262
Chr1:40118401-40120050	1	40118401	40120050	NA	NT5C1A-001	ENSP00000235628	5'-nucleotidase, cytosolic IA [Source:HGNC Symbol;Acc:17819]	-	CDS	upstream	4743	6.53281	6.85234	5.63019	4.05845	4.90689	4.65736	7.59538	5.72603	7.53613	6.33419	5.02686	3.90909	6.78482	5.91211	4.3029	4.7074	4.87887	6.58426	6.25442	8.06032
Chr1:40123201-40124400	1	40123201	40124400	NA	NT5C1A-001	ENSP00000235628	5'-nucleotidase, cytosolic IA [Source:HGNC Symbol;Acc:17819]	-	CDS	upstream	393	6.21088	6.32725	4.78889	2.92094	5	4.80175	6.89039	5.46299	7.75852	5.88353	8.04015	4.1986	6.19986	5.79346	3.53736	3.42729	4.2939	6.86077	5.19029	7.40631
Chr1:40167001-40168200	1	40167001	40168200	NA	null					Not found	0	6.04096	7.81519	6.13467	5.18398	6.47573	4.93299	7.84011	5.14106	6.82564	6.36896	6.5939	4.32413	6.17184	5.83411	6.84479	5.2049	3.75334	7.51132	6.45878	7.60425
Chr1:40254151-40255650	1	40254151	40255650	NA	BMP8B-001	ENSP00000361915	bone morphogenetic protein 8b [Source:HGNC Symbol;Acc:1075]	-	CDS	overlapping	0	8.17024	9.44138	7.39375	6.93887	8.48382	6.94859	9.53661	7.96888	9.1528	8.54649	9.18785	4.1986	8.67435	9.42241	7.69117	7.78986	3.46383	8.92636	7.99765	9.25549
Chr1:40264501-40266300	1	40264501	40266300	NA	null					Not found	0	5.99515	6.21763	5.81864	6.5763	8.75154	5.45382	6.89039	6.46299	5.68813	5.88353	8.64266	6.49405	5.02298	5.57107	6.02279	4.42729	5.15189	5.82683	7.56375	6.17683
Chr1:40348201-40349550	1	40348201	40349550	NA	TRIT1-003	ENSP00000388333	tRNA isopentenyltransferase 1 [Source:HGNC Symbol;Acc:20286]	-	CDS	overlapping	0	9.22583	9.90044	8.57025	8.73344	8.08746	8.65736	10.0021	8.92766	9.49136	9.46448	9.10486	8.69336	9.14688	9.19556	8.47282	8.69675	8.33282	9.09984	8.7024	9.23771
Chr1:40384801-40385850	1	40384801	40385850	NA	null					Not found	0	4.21088	3.29163	4.11082	0.599017	3.32193	3.57936	5.82985	2.81914	4.04428	2.97664	2.27197	3.54652	4.66934	3.24914	3.8004	3.94186	0.293905	4.82683	2.73086	5.01929
Chr1:40420051-40422300	1	40420051	40422300	NA	MFSD2A-001	ENSP00000361898	major facilitator superfamily domain containing 2A [Source:HGNC Symbol;Acc:25897]	+	CDS	overlapping	0	9.05776	8.79625	8.89043	7.70754	9.31741	8.74928	9.86798	9.17228	9.41496	8.925	9.91582	7.13148	8.86574	8.84409	8.52378	9.45914	7.21277	8.71991	7.96927	9.26722
Chr1:40438951-40439850	1	40438951	40439850	NA	MFSD2A-001	ENSP00000361898	major facilitator superfamily domain containing 2A [Source:HGNC Symbol;Acc:25897]	+	CDS	upstream	3711	4.50039	5.29163	6.01128	3.92094	5.35755	3.73136	6.50792	2.4041	6.2922	5.22457	3.44189	4.54652	4.95885	5.70858	5.16963	3.42729	3.10126	5.3414	4.90079	5.77828
Chr1:40455901-40456800	1	40455901	40456800	NA	null					Not found	0	5.12842	4.42913	4.90437	3.18398	4.16993	4.57936	5.401	4.27857	4.50371	4.29857	4.91582	2.32413	5.19986	5.36462	1.8004	4.07937	1.87887	4.24186	4.53822	4.90381
Chr1:40480501-40481550	1	40480501	40481550	NA	null					Not found	0	4.21088	4.13963	6.08657	6.55321	7.88874	4.57936	5.22412	7.32693	4.62924	2.5616	3.5939	6.92899	3.66934	4.75164	7.2378	6.42729	5.93776	4.24186	2.31582	5.31885
Chr1:40497601-40498650	1	40497601	40498650	NA	null					Not found	0	5.89894	5.05716	5.69578	5.40637	6.56986	5.31632	6.25515	5.14106	4.85163	4.88353	5.48142	4.4396	5.25431	5.24914	6.48222	4.61994	2.29391	5.82683	5.4313	6.31885
Chr1:40504651-40507350	1	40504651	40507350	NA	null					Not found	0	10.4588	10.2341	10.3713	10.474	10.4388	10.3073	10.9051	10.1767	10.7238	10.6805	10.6951	10.7363	10.5218	10.1779	10.4467	10.5595	10.4663	10.4624	10.5204	10.4037
Chr1:40562251-40563600	1	40562251	40563600	NA	PPT1-001	ENSP00000394863	palmitoyl-protein thioesterase 1 [Source:HGNC Symbol;Acc:9325]	-	CDS	overlapping	0	8.69917	8.85844	8.25378	6.82784	7.79442	8.02414	9.55231	8.05754	9.81246	9.0481	8.8756	7.65803	9.17185	9.16801	7.45384	8.30644	7.65146	8.60443	8.33078	9.18304
Chr1:40572901-40574100	1	40572901	40574100	NA	null					Not found	0	4.50039	2.9697	3.52586	0.599017	2.32193	3.86886	5.45545	2.81914	4.74472	2.97664	2.27197	0.739163	4.49942	3.47154	3.02279	2.2049	1.87887	2.43451	2.73086	4.77828
Chr1:40609351-40610400	1	40609351	40610400	NA	null					Not found	0	4.7414	5.13963	4.66336	4.40637	1	4.21679	4.94849	3.14106	2.62924	3.78399	3.07932	0.739163	4.74735	3.98611	2.53736	2.94186	2.61583	4.24186	3.05279	3.64078
Chr1:40626301-40627950	1	40626301	40627950	NA	RLF-001	ENSP00000361857	rearranged L-myc fusion [Source:HGNC Symbol;Acc:10025]	+	CDS	overlapping	0	9.89271	10.0465	9.52586	9.67583	9.21675	9.75816	10.2024	9.42647	9.69891	9.9453	9.5984	8.80525	9.62354	9.47475	9.08888	9.50868	9.07854	9.28938	9.48241	9.53802
Chr1:40706851-40708500	1	40706851	40708500	NA	RLF-001	ENSP00000361857	rearranged L-myc fusion [Source:HGNC Symbol;Acc:10025]	+	CDS	upstream	732	4.62592	4.9697	8.27002	8.95216	9.0954	4.10987	6.12683	6.14106	4.2142	5.36896	4.79553	9.29758	4.30677	4.12361	8.30819	7.6423	8.38137	5.56379	3.53822	4.77828
Chr1:40722301-40724700	1	40722301	40724700	NA	ZMPSTE24-001	ENSP00000361845	zinc metallopeptidase (STE24 homolog, S. cerevisiae) [Source:HGNC Symbol;Acc:12877]	+	CDS	overlapping	0	10.0716	10.2803	9.81495	9.76644	9.64566	9.65973	10.4966	10.0812	10.1317	10.0799	9.91221	9.69917	10.1215	9.85894	9.88786	9.80233	9.50822	9.74966	9.87041	9.99128
Chr1:40996501-40998000	1	40996501	40998000	NA	ZNF684-001	ENSP00000361784	zinc finger protein 684 [Source:HGNC Symbol;Acc:28418]	+	CDS	downstream	839	9.24553	9.22237	8.72749	9.13429	8.7879	8.59431	9.83755	8.73203	9.12643	8.99901	8.37	8.35387	9.3132	9.24538	8.48222	7.92372	8.31627	9.14876	8.49241	9.46351
Chr1:41048851-41049900	1	41048851	41049900	NA	null					Not found	0	5.28888	2.55466	8.91129	7.98272	7.11894	6.40943	6.85031	8.67089	5.43659	6.22457	2.27197	4.54652	2.82135	3.98611	4.85929	6.61994	6.02183	3.43451	3.90079	5.84241
Chr1:41077801-41078700	1	41077801	41078700	NA	null					Not found	0	4.84831	6.52429	6.13467	5.18398	5.20945	5.05329	7.04041	4.72603	6.25373	4.78399	4.27197	3.32413	5.08438	3.47154	5.42489	5.37482	2.61583	5.9891	4.90079	5.96271
Chr1:41111551-41112750	1	41111551	41112750	NA	RIMS3-001	ENSP00000361769	regulating synaptic membrane exocytosis 3 [Source:HGNC Symbol;Acc:21292]	-	CDS	downstream	3954	5.36288	5.42913	4.84778	1.59902	4.70044	3.86886	6.34442	4.27857	5.62924	5.73153	3.07932	4.90909	4.49942	3.98611	4.8004	3.94186	6.02183	4.52197	3.90079	7.15174
Chr1:41156401-41158800	1	41156401	41158800	NA	null					Not found	0	10.1856	10.5509	10.1798	10.0828	9.89633	9.88719	10.6793	9.95869	10.7061	10.2873	9.94439	9.484	10.3942	10.2862	9.9968	9.84635	9.5442	9.95611	9.95003	10.5903
Chr1:41168851-41169750	1	41168851	41169750	NA	null					Not found	0	4.04096	4.77706	6.61332	7.3539	7.63662	4.31632	5.82985	3.98906	3.85163	4.88353	4.44189	5.06109	4.58688	4.24914	4.53736	5.01225	6.27118	5.01947	4.73086	5.48878
Chr1:41340751-41344350	1	41340751	41344350	NA	null					Not found	0	6.97169	7.27348	8.30722	9.4128	10.0901	10.2486	10.6283	8.44849	9.82235	8.09558	10.0517	10.7064	8.56551	6.79346	10.0672	10.1879	10.5862	8.95021	7.31582	8.01929
Chr1:41414101-41415300	1	41414101	41415300	NA	null					Not found	0	4.7414	5.49326	6.20393	7.16887	7.32193	7.03879	7.28553	6.3427	8.31106	6.0641	7.78767	7.68168	6.05401	4.75164	8.18122	5.66433	8.13311	5.01947	5.86015	5.71117
Chr1:41417551-41418900	1	41417551	41418900	NA	null					Not found	0	3.84831	3.9697	5.24832	5.457	4.64386	5.53871	6.91002	4.81914	5.90226	4.43607	4.5939	4.32413	5.85697	4.66418	5.42489	5.07937	5.75334	4.60443	3.90079	6.44813
Chr1:41432701-41434500	1	41432701	41434500	NA	null					Not found	0	5.36288	4.9697	9.10781	8.38692	9.60363	7.4318	7.23972	8.27857	5.2142	4.14656	2.5939	9.71644	4.66934	4.98611	9.61845	8.74406	9.21277	5.92636	4.31582	6.99128
Chr1:41444401-41446950	1	41444401	41446950	NA	CTPS-202	ENSP00000443098	CTP synthase [Source:HGNC Symbol;Acc:2519]	+	CDS	downstream	709	10.5207	10.866	10.2887	9.80603	10.0728	10.4221	11.0382	10.1161	11.3157	10.5293	10.5223	10.1185	10.5922	10.6067	10.1268	10.5163	9.75129	10.4775	9.8524	10.8754
Chr1:41469001-41470200	1	41469001	41470200	NA	CTPS-001	ENSP00000361704	CTP synthase [Source:HGNC Symbol;Acc:2519]	+	CDS	overlapping	0	7.04096	8.50886	8.65101	7.15361	7.87037	6.91722	8.66635	6.51958	4.85163	7.22457	7.86443	6.92899	6.54381	6.12361	7.39535	7.01225	6.56069	5.64396	6.68506	6.90381
Chr1:41574301-41576400	1	41574301	41576400	NA	SCMH1-001	ENSP00000361678	sex comb on midleg homolog 1 (Drosophila) [Source:HGNC Symbol;Acc:19003]	-	CDS	overlapping	0	7.97169	6.01409	9.66745	8.92993	7.59246	9.39527	10.0778	9.08592	8.09956	7.88353	6.64701	8.81063	9.99327	9.78053	9.32396	6.78986	8.45881	7.60443	9.46557	8.92618
Chr1:41588551-41589450	1	41588551	41589450	NA	SCMH1-001	ENSP00000361678	sex comb on midleg homolog 1 (Drosophila) [Source:HGNC Symbol;Acc:19003]	-	CDS	overlapping	0	4.21088	4.77706	5.63019	4.84694	4.24793	5.45382	5.91002	4.98906	4.95117	5.73153	6.55737	5.1986	5.49942	5.61838	5.12233	4.7074	6.15189	4.68244	6.05279	5.22574
Chr1:41733451-41734650	1	41733451	41734650	NA	null					Not found	0	6.17024	4.87659	5.78889	5.24287	4.32193	5.26741	7.20836	3.81914	7.59887	5.5616	2.5939	4.54652	6.40631	4.66418	4.60775	4.52683	3.75334	6.5006	5.12318	6.48878
Chr1:41748151-41749050	1	41748151	41749050	NA	null					Not found	0	4.36288	4.9697	4.01128	3.92094	3.70044	4.99439	6.25515	3.62649	5.90226	4.43607	4.35943	3.06109	5.70887	4.75164	1.8004	3.61994	2.61583	6.01947	4.05279	7.20149
Chr1:41788351-41789400	1	41788351	41789400	NA	null					Not found	0	4.7414	5.29163	4.66336	3.40637	4.75489	4.65736	5.60745	4.27857	6.74472	3.78399	2.5939	2.32413	5.6287	4.75164	2.8004	4.2049	3.46383	5.71991	4.05279	6.07374
Chr1:41806501-41808900	1	41806501	41808900	NA	null					Not found	0	6.94785	6.01409	6.98529	6.21373	7.65105	7.91722	7.86043	8.35829	8.67363	5.88353	4.91582	4.06109	7.79404	6.36462	5.12233	5.78986	3.99434	7.00436	7.58884	8.30753
Chr1:41897101-41899650	1	41897101	41899650	NA	null					Not found	0	9.26977	8.26432	8.60053	8.7283	8.81057	8.81882	9.90024	8.8415	8.59117	8.30756	9.90314	7.33908	9.25764	7.43237	7.61632	9.27457	7.53231	9.50597	7.90079	9.42737
Chr1:41960401-41963250	1	41960401	41963250	NA	null					Not found	0	9.0125	6.80259	9.72945	8.51191	9.67948	8.89727	10.0712	9.27446	7.2341	7.90738	9.61404	9.12287	8.97109	7.76221	9.09195	9.61429	8.25391	9.6753	7.2066	9.60425
Chr1:41969101-41970750	1	41969101	41970750	NA	null					Not found	0	6.39851	6.13963	8.69578	6.55321	5.9542	5.31632	8.12683	4.9066	6.99847	6.22457	7.37	4.90909	6.11413	5.47154	7.00985	6.50258	4.61583	7.10693	6.75323	7.79458
Chr1:42092251-42093450	1	42092251	42093450	NA	null					Not found	0	6.04096	4.13963	8.00483	7.3672	8.3443	6.67622	6.45545	6.92766	7.1528	4.78399	4.5199	4.82663	6.3574	4.75164	7.94336	8.39472	5.96633	6.01947	5.05279	6.8107
Chr1:42137551-42138750	1	42137551	42138750	NA	null					Not found	0	3.84831	3.77706	8.03682	7.24287	8.04985	3.99439	6.53345	3.62649	5.99847	4.78399	5.44189	6.35387	5.25431	3.83411	8.19843	6.4013	5.99434	6.60443	5.86015	6.64078
Chr1:42149251-42150750	1	42149251	42150750	NA	null					Not found	0	5.50039	4.13963	6.67966	6.48166	6.32193	6.40943	7.37299	5.06706	6.59887	5.22457	6.27197	6.1986	6.11413	4.75164	5.50084	6.11179	5.10126	7.87745	5.53822	7.20149
Chr1:42208801-42210300	1	42208801	42210300	NA	null					Not found	0	5.68481	5.05716	6.37385	6.74876	4.39232	4.31632	6.67784	4.62649	5.68813	4.88353	7.22616	5.4396	4.95885	2.24914	3.91588	5.66433	3.29391	6.1894	4.73086	5.71117
Chr1:42248401-42249900	1	42248401	42249900	NA	null					Not found	0	9.47975	5.05716	9.17834	9.31326	8.85175	7.80175	9.61046	8.06706	8.0777	7.70456	8.85317	7.1142	9.03469	7.59492	9.52605	9.46543	7.03537	8.55345	9.00699	7.24959
Chr1:42305701-42307500	1	42305701	42307500	NA	null					Not found	0	5.62592	3.55466	8.15812	9.27497	7.79442	6.24232	8.65476	6.86353	6.08867	5.22457	8.86068	4.82663	7.79404	5.41907	8.93311	8.6914	3.46383	6.91024	7.93053	6.1262
Chr1:42321001-42322050	1	42321001	42322050	NA	null					Not found	0	3.62592	2.55466	5.87635	7.07475	6.22882	4.65736	5.78803	5.62649	7.86446	4.88353	4.7314	3.73916	6.3574	4.24914	5.07342	5.66433	2.29391	3.89394	5.12318	5.40631
Chr1:42327601-42329400	1	42327601	42329400	NA	null					Not found	0	7.93577	4.9697	9.43755	10.0253	9.76818	6.49689	9.67211	9.28266	6.13174	6.53123	7.99307	8.30141	8.56551	5.87364	10.1855	9.71005	7.41285	6.64396	9.64674	6.27305
Chr1:42334201-42336900	1	42334201	42336900	NA	null					Not found	0	7.21088	5.29163	8.97871	9.99776	9.82655	6.08186	9.14351	9.12292	6.40183	7.46849	7.69823	5.64605	7.98324	5.57107	9.89139	8.88203	4.46383	7.1894	9.37832	6.84241
Chr1:42365701-42368550	1	42365701	42368550	NA	null					Not found	0	6.28888	5.42913	9.58763	10.3556	9.77643	6.08186	8.20041	6.31099	6.53613	5.62049	8.43184	10.0879	7.17184	5.12361	9.08888	9.03356	8.78976	7.52197	6.48575	7.20149
Chr1:42385651-42387150	1	42385651	42387150	NA	null					Not found	0	7.39851	4.42913	9.29932	9.39992	9.00562	6.16432	7.80909	7.66463	6.17356	5.5616	7.62952	7.14855	6.89174	4.36462	8.94336	8.59148	7.11408	6.71991	7.8498	5.1262
Chr1:42401401-42402600	1	42401401	42402600	NA	null					Not found	0	6.28888	0.969701	8.06191	8.88904	7.74147	6.38671	8.24746	6.65203	4.85163	6.33419	7.01344	4.64605	8.15763	4.75164	7.73114	6.50258	3.75334	7.3414	8.22271	5.01929
Chr1:42411451-42412200	1	42411451	42412200	NA	null					Not found	0	4.7414	3.29163	7.95212	8.39992	5.12928	4.49689	7.02249	3.14106	4.50371	2.97664	8.41663	2.73916	6.08438	3.83411	5.57299	6.45283	0.293905	5.9891	4.90079	5.1262
Chr1:42611701-42613350	1	42611701	42613350	NA	null					Not found	0	5.36288	4.13963	5.63019	4.68648	5.12928	4.40943	6.48192	3.98906	5.50371	3.97664	4.91582	3.06109	5.45362	4.24914	5.02279	5.97749	2.29391	6.58426	5.12318	5.77828
Chr1:42630601-42632250	1	42630601	42632250	NA	GUCA2A-001	ENSP00000349493	guanylate cyclase activator 2A (guanylin) [Source:HGNC Symbol;Acc:4682]	-	CDS	downstream	218	5.12842	5.55466	6.35367	5.457	6.45943	4.65736	7.12683	4.51958	8.44516	4.14656	5.94439	4.54652	6.17184	4.98611	5.38536	6.26379	5.38137	7.24186	5.05279	7.64078
Chr1:42799651-42802200	1	42799651	42802200	NA	null					Not found	0	10.3561	10.7246	10.1243	10.0848	9.74315	10.1842	10.826	10.1568	10.7958	10.5877	10.2818	9.73634	10.5232	10.2954	9.8611	10.2941	9.77772	10.0381	10.4209	10.521
Chr1:42858751-42859950	1	42858751	42859950	NA	RIMKLA-001	ENSP00000414330	ribosomal modification protein rimK-like family member A [Source:HGNC Symbol;Acc:28725]	+	CDS	overlapping	0	5.04096	3.9697	4.59625	4.05845	4	3.99439	5.45545	3.14106	4.2142	3.78399	2.5939	2.73916	4.08438	3.47154	2.53736	2.2049	1.29391	4.43451	4.05279	5.48878
Chr1:42905251-42906300	1	42905251	42906300	NA	ZMYND12-001	ENSP00000361646	zinc finger, MYND-type containing 12 [Source:HGNC Symbol;Acc:21192]	-	CDS	overlapping	0	4.36288	2.9697	5.48933	3.59902	6.26679	7.37521	3.87049	3.62649	4.74472	3.29857	2.5939	6.09672	3.08438	3.24914	5.94336	2.94186	5.2008	3.43451	3.73086	4.1262
Chr1:42921151-42923400	1	42921151	42923400	NA	ZMYND12-001	ENSP00000361646	zinc finger, MYND-type containing 12 [Source:HGNC Symbol;Acc:21192]	-	CDS	overlapping	0	9.46722	8.49326	9.75467	9.51788	9.50383	9.8167	9.05812	9.57736	9.46213	8.08516	10.3313	9.59403	9.51065	8.0565	9.78908	9.94186	9.36805	9.0675	8.76429	9.82664
Chr1:42928051-42929400	1	42928051	42929400	NA	PPCS-001	ENSP00000361642	phosphopantothenoylcysteine synthetase [Source:HGNC Symbol;Acc:25686]	+	CDS	upstream	2454	7.7414	7.9239	7.81126	7.3539	6.59991	8.65261	8.65476	7.27857	8.55998	7.0641	7.47164	6.6699	8.92148	8.32239	7.35499	7.80976	7.51307	7.9423	6.86015	8.16434
Chr1:42995251-42996300	1	42995251	42996300	NA	CCDC30-013	ENSP00000426711	coiled-coil domain containing 30 [Source:HGNC Symbol;Acc:26103]	+	CDS	overlapping	0	4.04096	4.13963	6.97211	7.02528	7.18982	4.10987	4.15999	4.98906	5.04428	2.97664	1.85693	6.35387	2.08438	4.12361	4.739	4.7074	6.63376	3.75644	3.31582	4.48878
Chr1:43123351-43125150	1	43123351	43125150	NA	PPIH-001	ENSP00000306614	peptidylprolyl isomerase H (cyclophilin H) [Source:HGNC Symbol;Acc:14651]	+	CDS	overlapping	0	9.6812	9.82145	8.88341	8.9697	9.02791	9.28595	9.68925	9.24959	9.4789	9.28042	9.66214	8.36122	9.42423	9.26409	8.98693	9.14741	8.14565	9.50597	9.05279	9.46351
Chr1:43196251-43197450	1	43196251	43197450	NA	CLDN19-001	ENSP00000296387	claudin 19 [Source:HGNC Symbol;Acc:2040]	-	CDS	upstream	3307	4.04096	3.9697	4.20393	0.599017	3.45943	2.40943	4.87049	2.81914	4.95117	2.97664	3.07932	3.06109	4.49942	3.66418	2.8004	3.42729	3.46383	4.43451	4.19029	5.96271
Chr1:43281751-43283550	1	43281751	43283550	NA	CCDC23-002	ENSP00000361600	coiled-coil domain containing 23 [Source:HGNC Symbol;Acc:29204]	-	CDS	overlapping	0	9.63715	9.71117	9.51227	9.61861	9.26679	9.462	9.53345	9.45576	10.2537	9.60599	9.53641	9.39738	9.78019	9.58305	9.76618	9.76968	9.39981	9.31715	9.3855	10.0123
Chr1:43311451-43313400	1	43311451	43313400	NA	ZNF691-003	ENSP00000361581	zinc finger protein 691 [Source:HGNC Symbol;Acc:28028]	+	CDS	downstream	1930	9.7925	10.2224	9.27807	9.27497	9.26209	9.03514	9.41137	9.00896	9.24395	9.11619	9.45436	8.13148	9.49094	9.36809	10.1594	9.23465	8.19477	9.63418	9.45196	9.62719
Chr1:43432051-43434000	1	43432051	43434000	NA	null					Not found	0	6.53281	6.17915	9.91646	10.0989	9.60548	8.81882	7.52074	8.15005	5.43659	6.90738	8.07932	9.10111	6.4767	5.36462	9.33438	9.74147	9.29108	7.25469	6.28545	7.64078
Chr1:43538851-43540500	1	43538851	43540500	NA	null					Not found	0	4.50039	5.87659	6.33321	7.18398	7.07682	5.16432	5.55854	5.94842	5.79916	4.67708	2.5939	5.59714	5.54381	4.57107	6.48222	5.52683	6.40243	5.60443	5.63775	6.6764
Chr1:43608751-43610250	1	43608751	43610250	NA	FAM183A-003	ENSP00000387249	family with sequence similarity 183, member A [Source:HGNC Symbol;Acc:34347]	+	CDS	downstream	670	5.12842	5.13963	4.20393	3.76894	6.78136	4.21679	5.02249	3.62649	3.62924	3.97664	5.62952	4.1986	4.58688	3.83411	3.21544	2.2049	1.87887	4.75644	4.4313	4.48878
Chr1:43637251-43639050	1	43637251	43639050	NA	EBNA1BP2-001	ENSP00000236051	EBNA1 binding protein 2 [Source:HGNC Symbol;Acc:15531]	-	CDS	overlapping	0	8.64087	9.02498	8.59624	8.25007	8.47168	8.80175	9.11842	8.79642	8.02156	8.28952	9.25496	8.00595	8.41828	8.0565	8.35499	8.73888	7.78576	8.83539	8.15713	7.91876
Chr1:43671451-43673850	1	43671451	43673850	NA	WDR65-002	ENSP00000361570	WD repeat domain 65 [Source:HGNC Symbol;Acc:26485]	+	CDS	overlapping	0	4.94785	5.55466	5.11082	4.84694	8.30378	5.76698	6.42848	6.65203	5.62924	3.29857	7.41152	10.4045	5.25431	5.18774	5.739	6.2049	9.67545	5.3414	4.19029	5.96271
Chr1:43692601-43693650	1	43692601	43693650	NA	WDR65-002	ENSP00000361570	WD repeat domain 65 [Source:HGNC Symbol;Acc:26485]	+	CDS	overlapping	0	4.21088	4.67014	5.90437	3.18398	4.16993	4.57936	5.60745	4.51958	4.85163	4.78399	4.7314	5.49405	4.89174	4.66418	4.12233	4.2049	4.2939	5.56379	5.25442	7.01929
Chr1:43749601-43752300	1	43749601	43752300	NA	C1orf210-001	ENSP00000430918	chromosome 1 open reading frame 210 [Source:HGNC Symbol;Acc:28755]	-	CDS	downstream	660	5.68481	5.05716	6.18121	3.18398	4.45943	5.61888	6.45545	4.62649	6.56784	3.97664	4.91582	3.06109	5.45362	4.91211	5.07342	4.42729	2.87887	5.82683	5.73086	6.93356
Chr1:43759651-43760850	1	43759651	43760850	NA	null					Not found	0	5.43327	5.9697	7.62178	4.84694	6.10852	6.16432	5.65476	5.67712	4.95117	4.43607	4.35943	5.94862	6.33231	3.24914	5.6417	4.32038	6.3383	6.58426	8.58884	6.71117
Chr1:43795501-43796700	1	43795501	43796700	NA	null					Not found	0	4.7414	4.42913	6.87635	5.29946	6.75489	5.8357	5.55854	3.4041	3.04428	3.5616	7.15461	8.1986	5.40631	3.47154	6.9569	5.1435	8.43856	5.60443	7.73086	6.40631
Chr1:43823401-43825350	1	43823401	43825350	NA	CDC20-001	ENSP00000308450	cell division cycle 20 homolog (S. cerevisiae) [Source:HGNC Symbol;Acc:1723]	+	CDS	overlapping	0	10.1573	10.3556	9.85498	9.77144	9.74987	9.74928	10.036	9.74691	10.6065	10.0561	10.3568	9.71358	10.2676	9.93798	9.84661	9.98188	9.08832	10.062	9.27002	10.299
Chr1:43854451-43856400	1	43854451	43856400	NA	MED8-002	ENSP00000290663	mediator complex subunit 8 [Source:HGNC Symbol;Acc:19971]	-	CDS	overlapping	0	9.43756	9.85234	9.59194	9.26435	9.17991	9.62618	9.54919	10.1092	10.1397	9.36896	9.71284	9.31281	9.72342	9.28257	9.53962	9.51778	9.54183	9.11399	9.50235	9.64078
Chr1:43888801-43890150	1	43888801	43890150	NA	SZT2-001	ENSP00000361519	seizure threshold 2 homolog (mouse) [Source:HGNC Symbol;Acc:29040]	+	CDS	downstream	360	4.7414	3.77706	4.52586	0.599017	2.80735	4.10987	5.15999	3.4041	5.04428	2.97664	3.97241	3.54652	3.49942	2.98611	3.02279	3.61994	2.87887	3.75644	3.31582	4.77828
Chr1:43937551-43939500	1	43937551	43939500	NA	null					Not found	0	5.43327	4.67014	8.04942	8.14591	9.37721	7.21679	7.80909	7.98906	6.36621	4.5616	7.63829	9.93392	6.33231	6.24914	9.15795	8.82451	9.12996	5.60443	4.73086	6.40631
Chr1:43941151-43942500	1	43941151	43942500	NA	null					Not found	0	4.50039	3.77706	6.06191	5.64341	8.21917	4.21679	5.45545	6.14106	5.79916	3.78399	6.84182	9.33535	4.30677	4.57107	7.92968	8.07937	7.53231	4.82683	4.05279	5.77828
Chr1:43975201-43976400	1	43975201	43976400	NA	null					Not found	0	3.84831	4.67014	5.37385	2.18398	4.39232	3.40943	5.02249	3.81914	9.36621	3.97664	1.85693	3.32413	5.58688	5.61838	3.91588	4.32038	3.10126	4.43451	4.73086	6.27305
Chr1:43988251-43989600	1	43988251	43989600	NA	null					Not found	0	4.84831	4.55466	5.63019	3.40637	5.64386	4.57936	4.94849	4.51958	5.79916	2.5616	3.44189	4.64605	3.95885	4.24914	4.53736	5.57413	1.29391	4.68244	3.31582	6.01929
Chr1:43991251-43992750	1	43991251	43992750	NA	null					Not found	0	4.21088	4.29163	6.24832	4.68648	6.37504	5.05329	5.34442	5.14106	6.17356	4.97664	4.5199	6.13148	4.82135	4.57107	7.77003	6.01225	3.99434	4.52197	4.81832	6.07374
Chr1:44015251-44016750	1	44015251	44016750	NA	PTPRF-001	ENSP00000353030	protein tyrosine phosphatase, receptor type, F [Source:HGNC Symbol;Acc:9670]	+	CDS	overlapping	0	4.84831	5.67014	6.43275	3.92094	7.04439	5.21679	5.65476	3.4041	6.13174	4.97664	4.66429	4.54652	6.02298	4.24914	8.41019	4.7074	5.15189	5.01947	5.73086	5.77828
Chr1:44047201-44048850	1	44047201	44048850	NA	PTPRF-001	ENSP00000353030	protein tyrosine phosphatase, receptor type, F [Source:HGNC Symbol;Acc:9670]	+	CDS	overlapping	0	7.94785	5.87659	9.10781	9.07475	9.36632	9.07477	7.37299	8.07652	9.31106	6.18609	7.73957	6.06109	9.12147	6.3921	9.64798	9.31342	6.2481	7.36525	7.87041	6.60425
Chr1:44114851-44117400	1	44114851	44117400	NA	KDM4A-001	ENSP00000361473	lysine (K)-specific demethylase 4A [Source:HGNC Symbol;Acc:22978]	+	CDS	downstream	1447	10.1779	10.3273	10.1508	9.76141	9.56796	9.93886	10.0691	9.85256	10.3204	10.2103	10.2957	9.227	10.3621	9.96339	9.98031	9.97308	9.74099	9.76766	10.0437	10.0637
Chr1:44228401-44229900	1	44228401	44229900	NA	ST3GAL3-021	ENSP00000431816	ST3 beta-galactoside alpha-2,3-sialyltransferase 3 [Source:HGNC Symbol;Acc:10866]	+	CDS	overlapping	0	6.25041	6.21763	7.06191	6.3539	6.10852	5.16432	4.78803	4.27857	6.87717	4.88353	3.7314	5.54652	6.28078	5.57107	6.09808	3.61994	6.02183	6.7013	6.40329	6.56678
Chr1:44248651-44250150	1	44248651	44250150	NA	ST3GAL3-021	ENSP00000431816	ST3 beta-galactoside alpha-2,3-sialyltransferase 3 [Source:HGNC Symbol;Acc:10866]	+	CDS	overlapping	0	6.82232	6.36202	9.00806	9.48471	9.3837	7.74035	6.6313	8.22002	5.85163	5.73153	6.93018	6.09672	5.54381	5.87364	9.07342	8.58572	4.99434	7.59438	6.19029	7.50867
Chr1:44286601-44288850	1	44286601	44288850	NA	ST3GAL3-016	ENSP00000437206	ST3 beta-galactoside alpha-2,3-sialyltransferase 3 [Source:HGNC Symbol;Acc:10866]	+	CDS	overlapping	0	5.21088	5.49326	8.66336	8.87979	9.38154	7.12368	6.53345	6.88522	5.56784	4.78399	5.82656	7.71644	5.66934	5.91211	7.69117	7.37482	7.76151	6.66333	4.73086	6.36324
Chr1:44323651-44324700	1	44323651	44324700	NA	ST3GAL3-016	ENSP00000437206	ST3 beta-galactoside alpha-2,3-sialyltransferase 3 [Source:HGNC Symbol;Acc:10866]	+	CDS	overlapping	0	5.43327	4.67014	7.75852	7.25723	6.75489	6.71321	6.12683	2.4041	4.74472	4.67708	5.35943	5.78356	5.74735	3.83411	5.70729	7.29236	6.27118	6.13495	5.37472	6.44813
Chr1:44333401-44334300	1	44333401	44334300	NA	ST3GAL3-032	ENSP00000434686	ST3 beta-galactoside alpha-2,3-sialyltransferase 3 [Source:HGNC Symbol;Acc:10866]	+	CDS	overlapping	0	5.56452	6.55466	5.33321	3.92094	4.80735	4.10987	5.70056	4.72603	4.04428	4.97664	4.5939	4.73916	5.25431	4.47154	4.8004	4.07937	4.93776	7.42319	5.25442	6.44813
Chr1:44344651-44345850	1	44344651	44345850	NA	ST3GAL3-032	ENSP00000434686	ST3 beta-galactoside alpha-2,3-sialyltransferase 3 [Source:HGNC Symbol;Acc:10866]	+	CDS	overlapping	0	5.12842	4.42913	7.96548	2.18398	5.83289	7.93299	5.28553	5.21145	4.62924	4.43607	3.97241	4.82663	4.58688	4.47154	4.02279	7.37482	5.81747	5.13495	5.37472	6.22574
Chr1:44386651-44388300	1	44386651	44388300	NA	ST3GAL3-001	ENSP00000355341	ST3 beta-galactoside alpha-2,3-sialyltransferase 3 [Source:HGNC Symbol;Acc:10866]	+	CDS	overlapping	0	5.12842	5.55466	5.59625	4.05845	5.75489	5.40943	4.87049	3.98906	4.74472	4.43607	4.5199	6.23102	4.66934	4.12361	4.3029	5.01225	3.46383	5.86077	4.19029	6.87344
Chr1:44394601-44397450	1	44394601	44397450	NA	ST3GAL3-001	ENSP00000355341	ST3 beta-galactoside alpha-2,3-sialyltransferase 3 [Source:HGNC Symbol;Acc:10866]	+	CDS	overlapping	0	5.99515	6.36202	8.68774	6.43191	8.69	6.94859	6.50792	7.57402	6.7722	5.0641	7.76382	8.32413	5.99127	5.12361	7.34472	7.63116	8.0421	6.97367	5.63775	7.15174
Chr1:44411401-44413350	1	44411401	44413350	NA	IPO13-001	ENSP00000361418	importin 13 [Source:HGNC Symbol;Acc:16853]	+	CDS	overlapping	0	10.2674	10.6154	9.93525	9.95877	9.74483	10	10.3079	10.0789	10.736	10.1415	10.3474	9.59714	10.5397	10.05	9.95522	10.2365	9.57931	10.062	10.1275	10.4352
Chr1:44456401-44458800	1	44456401	44458800	NA	SLC6A9-008	ENSP00000361381	solute carrier family 6 (neurotransmitter transporter, glycine), member 9 [Source:HGNC Symbol;Acc:11056]	-	CDS	overlapping	0	8.28888	8.68395	9.31245	9.33034	9.00282	9.83988	8.89039	8.58732	10.5461	8.09558	9.58712	8.31659	9.29708	8.69761	9.47518	9.70475	8.60679	8.55863	8.64375	8.93356
Chr1:44470651-44472000	1	44470651	44472000	NA	SLC6A9-008	ENSP00000361381	solute carrier family 6 (neurotransmitter transporter, glycine), member 9 [Source:HGNC Symbol;Acc:11056]	-	CDS	overlapping	0	6.65567	7.58441	6.11082	3.40637	5.70044	7.20385	6.85031	6.17669	10.2755	7.5616	6.38049	3.32413	6.70887	6.98611	5.77003	5.97749	4.87887	6.16243	6.68506	8.07374
Chr1:44501551-44502900	1	44501551	44502900	NA	null					Not found	0	6.56452	8.04652	7.28074	5.55321	7.27612	7.40943	7.28553	6.92766	10.3412	7.22457	6.40125	6.4396	7.33231	6.83411	8.31347	6.23465	6.54183	6.56379	6.70814	8.9699
Chr1:44509501-44510700	1	44509501	44510700	NA	null					Not found	0	5.56452	4.87659	7.2263	6.99133	8.25739	6.80175	6.42848	6.62649	7.2922	4.88353	5.66429	4.32413	5.25431	4.12361	6.32396	4.52683	3.75334	5.43451	5.37472	7.24959
Chr1:44512801-44514450	1	44512801	44514450	NA	null					Not found	0	7.06332	8.79625	9.10781	7.24287	8.98868	9.36363	9.25898	7.95869	8.19402	8.55407	8.85317	8.22298	7.83927	6.66418	8.84115	7.46543	7.71176	5.82683	9.2066	7.34122
Chr1:44537551-44538600	1	44537551	44538600	NA	null					Not found	0	4.7414	4.9697	7.35367	4.29946	6	6.55918	5.15999	4.14106	4.2142	5.22457	6.68136	6.06109	4.19986	3.83411	5.94336	5.26379	5.96633	5.68244	6.75323	4.90381
Chr1:44550751-44551650	1	44550751	44551650	NA	null					Not found	0	1.04096	2.9697	3.66336	3.59902	4.45943	4.21679	5.22412	4.51958	3.04428	0.976638	2.5939	5.32413	3.08438	2.98611	3.21544	0.619936	4.93776	3.43451	2.73086	5.01929
Chr1:44619451-44621850	1	44619451	44621850	NA	null					Not found	0	4.62592	4.13963	4.59625	4.84694	5.83289	5.80175	5.15999	5.9066	5.62924	3.78399	3.27197	4.4396	5.25431	4.24914	4.46336	2.2049	6.07526	4.13495	4.53822	5.56678
Chr1:44678401-44679900	1	44678401	44679900	NA	DMAP1-001	ENSP00000354697	DNA methyltransferase 1 associated protein 1 [Source:HGNC Symbol;Acc:18291]	+	CDS	overlapping	0	8.84831	9.28711	8.98529	8.40637	8.35755	8.78881	9.64014	8.35052	9.43659	8.94818	8.93018	8.30141	9.22393	9.03922	8.59048	8.75949	8.50822	8.61938	8.87552	9.22574
Chr1:44792851-44794950	1	44792851	44794950	NA	ERI3-001	ENSP00000361331	ERI1 exoribonuclease family member 3 [Source:HGNC Symbol;Acc:17276]	-	CDS	overlapping	0	6.76888	5.67014	9.90783	9.69705	9.6865	8.59431	9.27421	7.99905	8.84518	7.62049	7.09215	8.79986	7.25431	5.87364	9.9124	9.57704	8.93415	6.58426	7.62568	8.04677
Chr1:44820151-44822100	1	44820151	44822100	NA	ERI3-001	ENSP00000361331	ERI1 exoribonuclease family member 3 [Source:HGNC Symbol;Acc:17276]	-	CDS	overlapping	0	9.13899	9.56216	9.07121	8.69177	8.79116	8.96402	10.0756	9.11834	9.45367	9.22457	9.15461	8.4045	9.57088	9.32596	9.06093	9.10375	8.23642	9.1726	8.70814	10.0331
Chr1:44843701-44844600	1	44843701	44844600	NA	null					Not found	0	4.62592	4.77706	6.52586	5.64341	5.78136	4.73136	5.22412	3.98906	4.50371	4.29857	3.97241	4.1986	6.11413	4.83411	5.94336	5.42729	4.81747	4.24186	5.58884	5.84241
Chr1:44870251-44872050	1	44870251	44872050	NA	null					Not found	0	9.5288	6.09898	9.87812	9.69968	9.54496	7.94081	9.40792	8.02859	5.99847	9.39027	5.85693	6.96798	10.075	9.75429	9.90194	10.0336	8.27118	3.75644	8.30829	5.22574
Chr1:44997151-44998950	1	44997151	44998950	NA	RNF220-001	ENSP00000347548	ring finger protein 220 [Source:HGNC Symbol;Acc:25552]	+	CDS	overlapping	0	5.89894	5.42913	9.49625	9.02947	9.06878	6.93299	7.0756	7.86353	5.04428	5.22457	2.27197	5.32413	7.14328	5.61838	8.93995	7.17453	5.3383	5.79206	7.27002	6.60425
Chr1:45010651-45012900	1	45010651	45012900	NA	RNF220-001	ENSP00000347548	ring finger protein 220 [Source:HGNC Symbol;Acc:25552]	+	CDS	overlapping	0	5.28888	5.82768	8.07429	4.68648	4.08746	5.26741	7.12683	5.4041	5.56784	5.5002	3.7314	3.32413	6.72824	6.87364	4.97032	5.32038	5.04879	5.38871	5.63775	7.44813
Chr1:45018451-45020400	1	45018451	45020400	NA	RNF220-001	ENSP00000347548	ring finger protein 220 [Source:HGNC Symbol;Acc:25552]	+	CDS	overlapping	0	5.28888	5.29163	7.59625	5.68648	6.65821	5.69483	6.42848	3.81914	5.68813	5.14656	2.5939	5.26273	5.40631	5.61838	5.88786	5.01225	6.66894	5.07836	4.63775	7.01929
Chr1:45033451-45034500	1	45033451	45034500	NA	RNF220-001	ENSP00000347548	ring finger protein 220 [Source:HGNC Symbol;Acc:25552]	+	CDS	overlapping	0	5.68481	3.77706	6.08657	4.68648	4.39232	4.73136	5.22412	4.4041	3.3662	4.43607	1.85693	3.54652	5.54381	3.47154	4.67487	3.61994	3.46383	4.24186	3.90079	6.01929
Chr1:45060601-45061500	1	45060601	45061500	NA	RNF220-001	ENSP00000347548	ring finger protein 220 [Source:HGNC Symbol;Acc:25552]	+	CDS	overlapping	0	5.62592	4.9697	7.24832	5.40637	5.12928	4.65736	5.09288	3.81914	2.62924	5.67708	2.85693	3.06109	6.11413	5.47154	5.34472	5.1435	5.2008	4.13495	5.05279	5.84241
Chr1:45158401-45160200	1	45158401	45160200	NA	C1orf228-013	ENSP00000420716	chromosome 1 open reading frame 228 [Source:HGNC Symbol;Acc:34345]	+	CDS	overlapping	0	5.68481	3.77706	5.24832	2.92094	3.45943	4.93299	5.91002	7.53338	5.04428	4.78399	3.85693	4.32413	4.89174	3.47154	2.53736	2.2049	2.29391	5.29249	4.4313	6.01929
Chr1:45168451-45169650	1	45168451	45169650	NA	C1orf228-013	ENSP00000420716	chromosome 1 open reading frame 228 [Source:HGNC Symbol;Acc:34345]	+	CDS	overlapping	0	4.84831	4.13963	4.20393	0.599017	4	4.65736	5.82985	3.81914	3.85163	2.5616	4.66429	3.54652	3.82135	3.83411	3.67487	3.42729	1.87887	4.24186	3.73086	5.96271
Chr1:45172051-45174900	1	45172051	45174900	NA	C1orf228-013	ENSP00000420716	chromosome 1 open reading frame 228 [Source:HGNC Symbol;Acc:34345]	+	CDS	overlapping	0	7.46722	5.36202	8.01128	8.27144	9.26679	8.87296	7.401	8.07652	5.50371	5.93083	9.07932	9.60644	6.85697	5.41907	7.72323	8.28527	8.19477	6.89394	6.05279	7.34122
Chr1:45178501-45179700	1	45178501	45179700	NA	C1orf228-013	ENSP00000420716	chromosome 1 open reading frame 228 [Source:HGNC Symbol;Acc:34345]	+	CDS	overlapping	0	6.04096	5.36202	4.37385	0.599017	4.9542	4.31632	6.25515	3.98906	3.62924	4.14656	2.5939	3.73916	4.74735	3.47154	4.91588	5.1435	0.293905	4.75644	5.19029	6.17683
Chr1:45186751-45188400	1	45186751	45188400	NA	C1orf228-013	ENSP00000420716	chromosome 1 open reading frame 228 [Source:HGNC Symbol;Acc:34345]	+	CDS	overlapping	0	5.94785	6.82768	7.66336	8.75889	8.92184	7.75816	6.05812	2.81914	4.62924	6.64906	8.61182	7.52052	5.49942	4.24914	8.46336	6.95979	7.00815	6.01947	7.45878	6.6764
Chr1:45195751-45198600	1	45195751	45198600	NA	C1orf228-013	ENSP00000420716	chromosome 1 open reading frame 228 [Source:HGNC Symbol;Acc:34345]	+	CDS	upstream	4676	9.87701	9.6597	9.81311	10.1632	10.1176	9.70175	9.95323	9.42276	8.2142	9.0694	10.0631	9.5238	9.43311	8.72488	9.6438	9.42407	9.28259	9.5969	9.136	9.37413
Chr1:45204601-45206550	1	45204601	45206550	NA	KIF2C-003	ENSP00000410346	kinesin family member 2C [Source:HGNC Symbol;Acc:6393]	+	CDS	overlapping	0	10.4333	10.1118	9.54155	9.3539	9.42626	9.43734	10.131	9.23699	10.1606	9.81899	9.65999	8.94373	10.1123	9.93097	9.49389	9.4111	8.54183	9.86287	8.78071	9.99833
Chr1:45251101-45252750	1	45251101	45252750	NA	BEST4-001	ENSP00000361281	bestrophin 4 [Source:HGNC Symbol;Acc:17106]	-	CDS	overlapping	0	8.38081	5.13963	7.25921	6.62138	7.46761	6.63825	7.14351	6.74987	5.99847	5.73153	4.85693	7.82663	6.30677	5.24914	7.16963	6.97749	8.015	5.92636	5.58884	6.87344
Chr1:45258601-45259950	1	45258601	45259950	NA	null					Not found	0	5.56452	4.42913	6.48933	5.95657	6.2854	5.96402	6.72293	3.81914	4.85163	3.5616	6.87188	5.26273	5.58688	5.36462	6.12233	4.61994	5.75334	5.79206	4.53822	6.40631
Chr1:45264901-45267000	1	45264901	45267000	NA	PLK3-201	ENSP00000442125	polo-like kinase 3 [Source:HGNC Symbol;Acc:2154]	+	CDS	overlapping	0	10.324	10.1816	9.89741	10.0253	9.8857	9.97739	10.5287	9.93027	10.0859	9.84082	10.3136	9.61261	9.95269	9.98159	9.71727	10.4607	9.79176	10.176	9.51876	9.99128
Chr1:45284701-45286800	1	45284701	45286800	NA	PTCH2-002	ENSP00000413169	patched 2 [Source:HGNC Symbol;Acc:9586]	-	CDS	overlapping	0	6.62592	5.72459	9.53932	5.64341	9.28077	8.22321	7.61943	8.55385	5.56784	5.93083	9.72318	9.46708	6.43016	5.87364	8.31872	8.11179	9.54893	7.13495	7.47233	6.87344
Chr1:45390151-45391200	1	45390151	45391200	NA	EIF2B3-001	ENSP00000353575	eukaryotic translation initiation factor 2B, subunit 3 gamma, 58kDa [Source:HGNC Symbol;Acc:3259]	-	CDS	overlapping	0	6.21088	4.29163	6.74309	8.9028	8.36632	8.19079	5.45545	4.27857	5.36621	4.67708	4.07932	8.88382	5.82135	3.47154	8.81906	7.24929	9.29672	5.68244	7.23866	5.31885
Chr1:45433651-45434400	1	45433651	45434400	NA	EIF2B3-001	ENSP00000353575	eukaryotic translation initiation factor 2B, subunit 3 gamma, 58kDa [Source:HGNC Symbol;Acc:3259]	-	CDS	overlapping	0	3.36288	3.55466	5.98529	6.457	6.62936	6.69483	5.15999	3.62649	4.50371	4.5616	3.27197	7.1142	4.74735	2.98611	5.97032	4.07937	8.015	3.89394	2.31582	4.90381
Chr1:45451351-45453000	1	45451351	45453000	NA	EIF2B3-001	ENSP00000353575	eukaryotic translation initiation factor 2B, subunit 3 gamma, 58kDa [Source:HGNC Symbol;Acc:3259]	-	CDS	downstream	4511	9.26977	9.11945	7.96548	7.80847	8.01681	8.43734	9.11842	8.35052	9.1684	8.28952	9.11746	8.22298	9.15763	8.21877	7.83015	8.76968	8.62033	9.02697	8.38191	8.78646
Chr1:45687151-45688050	1	45687151	45688050	NA	null					Not found	0	4.50039	3.9697	4.59625	5.68648	4.9542	2.99439	4.87049	3.62649	4.04428	3.5616	0.271968	5.69336	2.49942	2.24914	3.21544	3.78986	5.68622	4.13495	4.81832	5.01929
Chr1:45712201-45712950	1	45712201	45712950	NA	null					Not found	0	3.84831	2.9697	3.37385	7.67583	6.47573	8.06048	5.09288	5.06706	3.04428	3.29857	3.7314	7.64605	3.30677	3.24914	5.97032	4.94186	7.79375	5.43451	2.73086	5.40631
Chr1:45805051-45807150	1	45805051	45807150	NA	MUTYH-002	ENSP00000361170	mutY homolog (E. coli) [Source:HGNC Symbol;Acc:7527]	-	CDS	overlapping	0	10.4651	10.5319	10.1898	9.9697	9.96434	10.2752	10.7693	9.92504	11.0625	10.3647	10.33	10.0475	10.4316	10.4157	10.018	10.1474	9.58392	10.2467	9.76153	10.5234
Chr1:45821101-45822600	1	45821101	45822600	NA	TESK2-002	ENSP00000361156	testis-specific kinase 2 [Source:HGNC Symbol;Acc:11732]	-	CDS	overlapping	0	3.36288	4.77706	4.59625	4.50591	4.16993	3.86886	6.09288	3.14106	5.2142	0.976638	2.5939	3.32413	4.74735	3.47154	4.12233	0.619936	2.61583	5.1894	3.90079	6.07374
Chr1:45876451-45877800	1	45876451	45877800	NA	TESK2-002	ENSP00000361156	testis-specific kinase 2 [Source:HGNC Symbol;Acc:11732]	-	CDS	overlapping	0	5.21088	3.9697	5.01128	2.18398	6.16993	3.40943	5.34442	4.51958	4.62924	4.97664	7.55737	2.73916	3.95885	3.47154	3.02279	2.94186	4.54183	4.89394	2.31582	6.40631
Chr1:45955951-45957900	1	45955951	45957900	NA	CCDC163P-006	ENSP00000435596	coiled-coil domain containing 163, pseudogene [Source:HGNC Symbol;Acc:27003]	-	CDS	upstream	2831	7.43327	7.41264	7.92503	7.29946	7.39232	7.96402	7.52074	6.9066	7.85163	7.60599	8.65567	7.06109	7.57624	7.41907	8.03562	8.05456	8.14565	6.79206	7.70814	8.60425
Chr1:45964501-45967200	1	45964501	45967200	NA	CCDC163P-006	ENSP00000435596	coiled-coil domain containing 163, pseudogene [Source:HGNC Symbol;Acc:27003]	-	CDS	overlapping	0	7.21088	7.2551	8.94539	8.5877	8.62936	9.1064	9.21626	8.36603	7.55207	7.8955	10.1546	7.82663	8.5547	8.03922	8.70328	8.34104	8.19477	8.93036	8.48575	8.99833
Chr1:45986551-45989250	1	45986551	45989250	NA	PRDX1-001	ENSP00000361152	peroxiredoxin 1 [Source:HGNC Symbol;Acc:9352]	-	CDS	downstream	1836	10.2059	10.6492	10.0384	10.5503	10.2131	9.96785	10.3888	9.96634	9.7722	9.85008	10.2535	9.82397	10.4272	10.1195	10.1283	10.1803	9.86186	10.2043	9.73368	10.3468
Chr1:46015651-46017750	1	46015651	46017750	NA	null					Not found	0	10.1958	10.3469	9.36883	9.43191	9.37069	9.78664	10.5015	9.80498	10.158	9.91328	9.89402	9.30902	10.2526	9.93565	9.55306	9.75949	9.46132	9.86077	9.73368	10.5501
Chr1:46035451-46036500	1	46035451	46036500	NA	AKR1A1-001	ENSP00000361140	aldo-keto reductase family 1, member A1 (aldehyde reductase) [Source:HGNC Symbol;Acc:380]	+	CDS	overlapping	0	3.36288	4.55466	6.01128	4.40637	4.52356	4.93299	5.91002	2.81914	5.79916	5.5002	4.44189	3.90909	4.95885	4.57107	3.8004	4.7074	4.75334	4.01947	4.19029	6.17683
Chr1:46048651-46051200	1	46048651	46051200	NA	NASP-007	ENSP00000400792	nuclear autoantigenic sperm protein (histone-binding) [Source:HGNC Symbol;Acc:7644]	+	CDS	overlapping	0	10.2746	10.5789	9.89567	9.79131	9.51175	10.0994	10.685	9.42647	10.7841	10.4361	10.2115	9.21084	10.2273	10.4537	9.66252	9.94861	8.75743	9.85657	9.69665	10.4584
Chr1:46215451-46217250	1	46215451	46217250	NA	IPP-002	ENSP00000353024	intracisternal A particle-promoted polypeptide [Source:HGNC Symbol;Acc:6108]	-	CDS	downstream	3368	10.0211	10.2294	9.77947	9.60183	9.36632	9.85237	10.228	9.21574	10.7482	10.0535	10.0761	9.50735	10.1648	10.0862	9.50546	9.79236	9.51549	9.84178	9.88821	10.0637
Chr1:46267951-46270650	1	46267951	46270650	NA	MAST2-001	ENSP00000354671	microtubule associated serine/threonine kinase 2 [Source:HGNC Symbol;Acc:19035]	+	CDS	overlapping	0	10.4247	10.2271	10.1287	10.0105	9.89785	9.90728	9.92938	9.51958	10.8273	10.0852	10.2276	9.33908	10.1104	10.0173	10.034	9.90534	9.43601	9.54042	9.64375	9.85023
Chr1:46357351-46358850	1	46357351	46358850	NA	MAST2-001	ENSP00000354671	microtubule associated serine/threonine kinase 2 [Source:HGNC Symbol;Acc:19035]	+	CDS	overlapping	0	6.46722	6.90044	7.95882	8.7283	8.17991	8.21033	6.82985	6.92766	5.50371	6.46849	4.7314	8.13148	6.52179	6.47154	7.71528	6.57413	8.75334	6.73829	7.53822	7.15174
Chr1:46394251-46395750	1	46394251	46395750	NA	MAST2-001	ENSP00000354671	microtubule associated serine/threonine kinase 2 [Source:HGNC Symbol;Acc:19035]	+	CDS	overlapping	0	4.62592	4.67014	7.16971	7.10681	4.24793	6.94859	5.22412	5.14106	5.50371	5.73153	4.35943	5.4396	5.66934	4.75164	5.38536	5.01225	7.50336	5.71991	5.25442	6.44813
Chr1:46419601-46420950	1	46419601	46420950	NA	MAST2-001	ENSP00000354671	microtubule associated serine/threonine kinase 2 [Source:HGNC Symbol;Acc:19035]	+	CDS	overlapping	0	6.08535	5.29163	8.65514	8.17645	7.10852	9.13053	6.55854	7.76165	5.62924	6.02103	7.47164	6.23102	8.10675	6.83411	4.97032	7.3614	8.16427	5.24186	7.40329	6.74511
Chr1:46444501-46445850	1	46444501	46445850	NA	MAST2-001	ENSP00000354671	microtubule associated serine/threonine kinase 2 [Source:HGNC Symbol;Acc:19035]	+	CDS	overlapping	0	4.50039	5.13963	5.66336	7.69705	5.67243	7.76698	4.94849	4.27857	5.43659	5.0641	3.27197	5.59714	4.95885	4.57107	4.38536	4.52683	8.44872	4.52197	5.19029	5.01929
Chr1:46597651-46599450	1	46597651	46599450	NA	PIK3R3-204	ENSP00000439913	phosphoinositide-3-kinase, regulatory subunit 3 (gamma) [Source:HGNC Symbol;Acc:8981]	-	CDS	overlapping	0	10.8754	11.0059	10.2346	10.3286	10.0444	10.3967	10.7907	10.1183	11.2755	10.894	10.4318	10.1055	10.6892	10.7688	10.155	10.4841	10.1441	10.2909	10.5106	10.9806
Chr1:46688851-46690050	1	46688851	46690050	NA	C1orf190-001	ENSP00000361048	chromosome 1 open reading frame 190 [Source:HGNC Symbol;Acc:32327]	+	CDS	upstream	2959	6.12842	7.9239	7.69578	6.64341	6.83289	7.05329	6.48192	5.21145	5.74472	6.758	7.69823	6.29375	6.40631	4.98611	6.90194	6.34786	5.96633	6.36525	6.63775	7.4686
Chr1:46712251-46714800	1	46712251	46714800	NA	RAD54L-001	ENSP00000361043	RAD54-like (S. cerevisiae) [Source:HGNC Symbol;Acc:9826]	+	CDS	overlapping	0	9.75863	9.88259	9.30459	8.95216	9.15987	9.28901	9.03595	7.99905	10.7975	9.32537	9.84751	8.83192	9.89174	9.41237	9.13132	9.09567	7.97339	9.46241	7.30072	9.45328
Chr1:46798801-46799850	1	46798801	46799850	NA	null					Not found	0	5.21088	5.72459	6.33321	3.40637	4.45943	4.57936	5.34442	4.4041	5.79916	4.97664	4.7314	4.1986	7.59745	6.12361	4.3029	3.42729	3.10126	6.80955	5.37472	7.72824
Chr1:46804801-46807650	1	46804801	46807650	NA	NSUN4-001	ENSP00000419740	NOP2/Sun domain family, member 4 [Source:HGNC Symbol;Acc:31802]	+	CDS	overlapping	0	10.4839	10.9224	10.39	10.21	9.85643	10.2312	10.4571	10.1068	11.1436	10.369	10.8227	9.57837	10.5176	10.2416	10.2626	10.1649	9.70117	10.2956	10.1424	10.8306
Chr1:46859401-46860750	1	46859401	46860750	NA	FAAH-001	ENSP00000243167	fatty acid amide hydrolase [Source:HGNC Symbol;Acc:3553]	+	CDS	overlapping	0	4.21088	6.67014	7.21516	4.68648	0	7.63825	3.87049	4.62649	9.18894	1.97664	8.65567	3.32413	4.82135	5.18774	5.85929	6.84875	4.2008	6.79206	6.99765	9.12621
Chr1:46867201-46868550	1	46867201	46868550	NA	FAAH-001	ENSP00000243167	fatty acid amide hydrolase [Source:HGNC Symbol;Acc:3553]	+	CDS	overlapping	0	5.04096	6.55466	5.59625	2.18398	4.90689	6.31632	5.74496	4.98906	8.2341	6.02103	5.55737	0.739163	5.95885	4.75164	3.91588	3.78986	2.29391	6.36525	5.63775	7.72824
Chr1:46907701-46909200	1	46907701	46909200	NA	null					Not found	0	5.68481	6.21763	6.75852	5.84694	7.03342	5.57936	5.401	5.21145	5.36621	4.88353	8.19083	5.49405	5.3574	3.83411	6.69117	5.01225	5.2481	5.75644	5.94032	6.60425
Chr1:46982251-46983750	1	46982251	46983750	NA	DMBX1-001	ENSP00000353132	diencephalon/mesencephalon homeobox 1 [Source:HGNC Symbol;Acc:19026]	+	CDS	upstream	4085	4.62592	4.67014	4.11082	3.40637	4.9542	4.73136	4.87049	4.62649	5.43659	4.29857	4.5939	3.06109	5.30677	4.24914	4.3029	4.52683	4.10126	5.13495	4.63775	6.44813
Chr1:47005351-47006400	1	47005351	47006400	NA	null					Not found	0	4.84831	4.13963	4.90437	3.18398	2.80735	4.86886	4.78803	2.4041	5.2142	2.5616	1.85693	3.06109	4.95885	3.24914	3.91588	3.61994	1.87887	4.24186	3.05279	6.44813
Chr1:47013301-47014350	1	47013301	47014350	NA	KNCN-002	ENSP00000419705	kinocilin [Source:HGNC Symbol;Acc:26488]	-	CDS	overlapping	0	4.50039	4.77706	5.93185	4.92094	5.72792	4.49689	4.02249	4.51958	6.08867	3.78399	4.5199	3.90909	4.82135	3.47154	5.6417	4.32038	4.68622	6.31715	4.19029	7.34122
Chr1:47022151-47023200	1	47022151	47023200	NA	MKNK1-001	ENSP00000361014	MAP kinase interacting serine/threonine kinase 1 [Source:HGNC Symbol;Acc:7110]	-	CDS	upstream	1047	3.36288	3.55466	6.72749	5.92095	7.31288	4.93299	4.70056	4.51958	6.08867	3.5616	3.07932	3.54652	2.08438	4.47154	8.01634	4.2049	1.87887	4.82683	4.4313	5.1262
Chr1:47069101-47070750	1	47069101	47070750	NA	MOB3C-001	ENSP00000271139	MOB kinase activator 3C [Source:HGNC Symbol;Acc:29800]	-	CDS	upstream	4577	4.94785	8.29163	8.25921	8.62138	7.3837	8.06764	5.70056	7.08592	7.58344	7.5002	8.66857	7.1142	8.02298	5.87364	8.47282	8.18979	7.97339	7.77436	4.53822	6.60425
Chr1:47081401-47083350	1	47081401	47083350	NA	MOB3C-001	ENSP00000271139	MOB kinase activator 3C [Source:HGNC Symbol;Acc:29800]	-	CDS	downstream	653	8.08535	8.87057	9.55044	9.4663	9.42417	9.38671	7.85031	8.65834	10.1684	8.44424	9.50079	8.69917	9.72342	7.57107	9.29225	10.008	9.23642	9.08197	9.11457	10.0837
Chr1:47183401-47185950	1	47183401	47185950	NA	KIAA0494-201	ENSP00000442465	KIAA0494 [Source:HGNC Symbol;Acc:29051]	-	CDS	overlapping	0	9.02395	9.41678	9.16971	8.68648	8.75154	9.14075	9.12263	9.51958	9.52001	9.29405	9.8323	8.81063	9.6287	9.42241	9.13132	9.34104	8.85615	9.54303	9.24261	10.461
Chr1:47190601-47191800	1	47190601	47191800	NA	null					Not found	0	5.21088	6.17915	4.66336	2.18398	3.45943	2.73136	4.60745	3.81914	6.82564	4.78399	3.5939	3.06109	5.45362	5.18774	3.91588	2.94186	3.61583	7.07836	4.19029	8.29613
Chr1:47201251-47201850	1	47201251	47201850	NA	null					Not found	0	4.21088	0.969701	0.203928	0.599017	1	1.99439	3.28553	3.4041	3.04428	2.97664	2.5939	1.73916	1.49942	2.66418	1.21544	0.619936	1.87887	3.75644	0.730862	2.90381
Chr1:47644051-47645700	1	47644051	47645700	NA	PDZK1IP1-001	ENSP00000294338	PDZK1 interacting protein 1 [Source:HGNC Symbol;Acc:16887]	-	CDS	upstream	3943	7.30774	7.05716	6.54378	6.62138	7.37504	6.81882	6.87049	6.88522	6.32968	5.83462	8.69823	6.88891	8.08438	7.26409	5.88786	6.80976	6.8017	7.78324	7.45878	7.6764
Chr1:47778901-47780700	1	47778901	47780700	NA	STIL-001	ENSP00000353544	SCL/TAL1 interrupting locus [Source:HGNC Symbol;Acc:10879]	-	CDS	downstream	2910	9.70629	9.79307	9.10177	9.42874	9.28077	9.19733	9.27042	8.84704	10.0129	9.0641	9.60064	8.93884	9.86793	9.68377	9.19272	8.66979	8.56069	9.44574	8.60123	9.13903
Chr1:47798701-47801100	1	47798701	47801100	NA	CMPK1-001	ENSP00000360939	cytidine monophosphate (UMP-CMP) kinase 1, cytosolic [Source:HGNC Symbol;Acc:18170]	+	CDS	overlapping	0	10.4609	10.7095	10.2834	10.1613	10.0403	10.2264	10.6357	10.2765	10.9926	10.5803	10.4077	9.82663	10.5218	10.3887	10.0812	10.3444	9.99954	10.0418	10.3566	9.98419
Chr1:47901601-47904150	1	47901601	47904150	NA	FOXD2-001	ENSP00000335493	forkhead box D2 [Source:HGNC Symbol;Acc:3803]	+	CDS	overlapping	0	9.09624	9.57333	9.58331	9.14205	9.56224	9.71093	10.1924	9.13202	10.9956	10.4113	10.5116	8.89903	10.4063	9.69761	9.36518	9.87732	9.16427	9.9423	9.34557	6.87344
Chr1:47953201-47954250	1	47953201	47954250	NA	null					Not found	0	1.04096	4.42913	4.52586	2.18398	4.32193	4.40943	5.02249	2.81914	5.13174	3.78399	3.07932	3.54652	3.30677	4.47154	2.53736	4.07937	3.29391	4.52197	4.31582	5.1262
Chr1:48020701-48021900	1	48020701	48021900	NA	null					Not found	0	2.62592	4.42913	4.20393	2.18398	2.58496	3.73136	5.34442	4.98906	4.36621	4.5616	4.17886	4.1986	3.95885	3.24914	2.8004	4.07937	1.87887	4.13495	5.86015	6.01929
Chr1:48026851-48027900	1	48026851	48027900	NA	null					Not found	0	3.04096	4.29163	4.11082	2.18398	2.80735	2.73136	4.15999	4.81914	6.04428	4.5616	6.99989	4.64605	4.08438	1.66418	3.91588	3.61994	4.2939	4.52197	4.63775	4.64078
Chr1:48035101-48036300	1	48035101	48036300	NA	null					Not found	0	4.36288	5.67014	4.95882	1.59902	5.72792	4.65736	6.22412	3.81914	6.92692	6.4029	8.95847	7.23102	4.89174	5.75164	3.21544	4.86786	6.3383	3.89394	5.97879	6.48878
Chr1:48048151-48049200	1	48048151	48049200	NA	null					Not found	0	4.7414	4.67014	3.90437	3.40637	4.9542	2.99439	5.401	3.14106	3.85163	5.5616	7.15461	3.06109	4.08438	4.24914	4.02279	4.32038	1.29391	4.43451	6.25442	4.64078
Chr1:48115501-48116700	1	48115501	48116700	NA	null					Not found	0	4.36288	4.29163	7.24832	6.457	7.31288	4.49689	5.15999	6.57402	4.95117	5.22457	5.27197	8.48736	5.85697	4.91211	6.12233	7.15909	7.95924	5.07836	7.77526	6.8107
Chr1:48337051-48338100	1	48337051	48338100	NA	null					Not found	0	3.84831	4.55466	4.11082	2.18398	5.39232	4.21679	5.15999	3.62649	6.04428	3.78399	2.27197	6.09672	3.66934	3.98611	1.21544	5.1435	5.2481	4.24186	4.4313	6.77828
Chr1:48360001-48361050	1	48360001	48361050	NA	null					Not found	0	4.62592	7.62791	5.45186	3.76894	6.45943	4.57936	5.15999	5.4041	5.43659	6.22457	2.85693	4.98709	3.82135	4.12361	6.28153	5.32038	3.99434	5.82683	4.19029	6.31885
Chr1:48456601-48457350	1	48456601	48457350	NA	null					Not found	0	3.36288	3.55466	3.66336	0.599017	3.16992	4.21679	2.70056	2.4041	3.3662	2.5616	0.271968	3.54652	4.08438	2.98611	2.21544	2.2049	3.75334	3.75644	0.730862	4.90381
Chr1:48559201-48560250	1	48559201	48560250	NA	null					Not found	0	3.36288	3.29163	1.78889	2.18398	1.58496	0.40943	2.28553	1.81914	4.04428	3.29857	1.85693	0.739163	4.08438	3.83411	1.8004	2.2049	0.293905	2.43451	3.31582	4.64078
Chr1:48937051-48938700	1	48937051	48938700	NA	SPATA6-001	ENSP00000360913	spermatogenesis associated 6 [Source:HGNC Symbol;Acc:18309]	-	CDS	overlapping	0	10.107	10.3812	8.94202	8.39992	8.24317	9.7515	10.2417	9.10454	8.11037	10.343	9.80724	8.6758	10.2375	10.3542	8.2869	9.54178	9.24227	9.70597	10.0369	10.652
Chr1:48963601-48964500	1	48963601	48964500	NA	null					Not found	0	5.89894	7.67014	4.45186	4.18398	4	3.57936	7.91973	6.54706	5.85163	7.5158	5.44189	5.38302	8.20678	6.83411	3.91588	4.86786	6.07526	7.09272	8.05279	8.27305
Chr1:48996151-48996900	1	48996151	48996900	NA	AGBL4-202	ENSP00000411423	ATP/GTP binding protein-like 4 [Source:HGNC Symbol;Acc:25892]	-	CDS	upstream	2835	4.7414	5.42913	4.01128	1.59902	3.80735	3.21679	7.14351	5.06706	6.56784	5.43607	1.27197	1.73916	8.22052	6.96796	2.21544	3.61994	1.87887	5.29249	5.53822	8.00535
Chr1:49162651-49163250	1	49162651	49163250	NA	AGBL4-202	ENSP00000411423	ATP/GTP binding protein-like 4 [Source:HGNC Symbol;Acc:25892]	-	CDS	overlapping	0	3.36288	3.29163	3.52586	2.18398	2	2.73136	5.09288	2.4041	5.90226	3.78399	0.271968	4.4396	5.3574	5.30804	2.8004	3.42729	2.61583	4.24186	3.53822	4.90381
Chr1:49318501-49319100	1	49318501	49319100	NA	AGBL4-202	ENSP00000411423	ATP/GTP binding protein-like 4 [Source:HGNC Symbol;Acc:25892]	-	CDS	overlapping	0	4.36288	3.29163	7.14644	2.18398	4.90689	6.78447	7.64308	4.27857	5.04428	5.0641	0.271968	7.14855	7.70887	6.87364	4.85929	2.94186	6.54183	6.36525	5.37472	6.31885
Chr1:50794801-50795700	1	50794801	50795700	NA	null					Not found	0	3.62592	2.9697	3.66336	0.599017	2.58496	0.40943	3.50792	3.14106	4.04428	2.97664	0.271968	2.73916	3.49942	4.24914	3.67487	2.94186	0.293905	3.60443	3.73086	4.64078
Chr1:50798401-50799750	1	50798401	50799750	NA	null					Not found	0	4.36288	4.29163	4.59625	0.599017	0	2.73136	5.45545	7.70178	5.90226	5.78399	7.32725	3.54652	2.49942	4.75164	4.38536	4.42729	3.99434	6.62433	6.05279	7.24959
Chr1:50814001-50815050	1	50814001	50815050	NA	null					Not found	0	4.7414	3.77706	4.78889	1.59902	2.32193	3.21679	5.15999	1.81914	7.50371	3.5616	3.27197	1.73916	5.14328	6.47154	3.67487	4.78986	1.87887	5.01947	4.63775	6.17683
Chr1:51068701-51070500	1	51068701	51070500	NA	FAF1-001	ENSP00000379457	Fas (TNFRSF6) associated factor 1 [Source:HGNC Symbol;Acc:3578]	-	CDS	overlapping	0	5.7414	4.42913	6.74309	0.599017	8.65464	9.38097	5.94849	5.72603	6.62924	6.29857	3.7314	8.07901	9.45652	7.23404	3.67487	6.88672	8.15189	6.91024	5.81833	5.77828
Chr1:51086101-51087450	1	51086101	51087450	NA	FAF1-001	ENSP00000379457	Fas (TNFRSF6) associated factor 1 [Source:HGNC Symbol;Acc:3578]	-	CDS	overlapping	0	4.84831	4.77706	7.20393	0.599017	6.55459	4.10987	4.94849	3.62649	4.62924	4.67708	4.85693	4.1986	4.89174	4.12361	0.215436	6.34786	5.2481	3.60443	3.05279	3.90381
Chr1:51338851-51340050	1	51338851	51340050	NA	FAF1-001	ENSP00000379457	Fas (TNFRSF6) associated factor 1 [Source:HGNC Symbol;Acc:3578]	-	CDS	overlapping	0	5.68481	7.07823	6.95882	0.599017	7.26679	6.76698	5.15999	4.9066	4.36621	5.43607	5.79553	4.32413	7.68924	4.66418	4.3029	5.52683	6.48373	6.89394	7.08841	5.01929
Chr1:51424651-51426750	1	51424651	51426750	NA	FAF1-001	ENSP00000379457	Fas (TNFRSF6) associated factor 1 [Source:HGNC Symbol;Acc:3578]	-	CDS	overlapping	0	10.1599	10.2849	9.6756	0.599017	9.41785	9.66917	9.77738	8.93808	10.5931	9.97099	9.69613	8.86329	9.98324	9.9588	8.04833	9.51778	9.01158	9.58933	9.57948	9.7367
Chr1:51778951-51780750	1	51778951	51780750	NA	TTC39A-004	ENSP00000393952	tetratricopeptide repeat domain 39A [Source:HGNC Symbol;Acc:18657]	-	CDS	overlapping	0	7.56452	5.55466	8.52134	7.63244	8.58871	8.03879	7.89039	8.25376	5.13174	6.4029	7.87188	6.76153	8.61836	5.41907	6.67487	8.29942	6.02183	7.67291	6.19029	7.29613
Chr1:51796201-51798300	1	51796201	51798300	NA	TTC39A-001	ENSP00000406144	tetratricopeptide repeat domain 39A [Source:HGNC Symbol;Acc:18657]	-	CDS	overlapping	0	9.11242	7.30955	8.57025	8.63794	9.04985	7.08186	7.70056	8.27857	4.85163	8.30756	8.83039	7.13148	9.99127	8.19556	6.67487	7.24929	7.59769	8.93036	8.19029	8.34122
Chr1:51799951-51801150	1	51799951	51801150	NA	TTC39A-001	ENSP00000406144	tetratricopeptide repeat domain 39A [Source:HGNC Symbol;Acc:18657]	-	CDS	overlapping	0	5.21088	4.9697	5.24832	3.76894	5.12928	4.86886	5.22412	4.62649	3.85163	4.29857	4.79553	2.32413	5.30677	3.47154	3.02279	3.78986	3.10126	5.52197	3.53822	5.22574
Chr1:52006501-52008600	1	52006501	52008600	NA	null					Not found	0	5.28888	4.55466	5.72749	6.27144	6.59991	6.31632	5.55854	5.9066	4.74472	5.62049	6.85693	4.1986	6.70887	4.57107	8.96698	4.94186	4.2939	5.29249	5.53822	6.99128
Chr1:52023751-52025100	1	52023751	52025100	NA	null					Not found	0	5.56452	4.42913	6.24832	6.24287	9.00562	6.61888	3.87049	5.46299	4.36621	3.97664	5.79553	8.30902	4.95885	5.36462	8.81163	5.97749	7.65146	5.3414	4.63775	6.71117
Chr1:52034401-52036650	1	52034401	52036650	NA	null					Not found	0	6.43327	6.39597	8.29139	8.26435	9.81858	7.08186	6.28553	4.98906	5.68813	6.36896	6.69823	6.98709	9.47956	6.44554	8.33438	6.72846	5.87887	5.60443	6.77526	8.24959
Chr1:52082101-52083600	1	52082101	52083600	NA	OSBPL9-202	ENSP00000360775	oxysterol binding protein-like 9 [Source:HGNC Symbol;Acc:16386]	+	CDS	overlapping	0	8.91132	9.05185	8.15812	8.09087	8.10329	8.25492	8.75585	7.46299	9.2192	9.14155	9.04675	8.15702	9.18592	8.97706	8.22106	8.5388	8.44872	8.36525	8.54464	8.85023
Chr1:52087651-52089000	1	52087651	52089000	NA	OSBPL9-202	ENSP00000360775	oxysterol binding protein-like 9 [Source:HGNC Symbol;Acc:16386]	+	CDS	overlapping	0	5.36288	4.67014	6.64687	7.32694	7.55459	5.99439	5.70056	5.81914	5.62924	5.22457	3.7314	6.54652	5.92568	4.66418	5.85929	4.32038	5.72017	5.38871	5.19029	6.56678
Chr1:52102201-52103550	1	52102201	52103550	NA	OSBPL9-202	ENSP00000360775	oxysterol binding protein-like 9 [Source:HGNC Symbol;Acc:16386]	+	CDS	overlapping	0	4.84831	3.29163	5.75852	4.84694	6.24793	4.57936	4.15999	5.06706	2.62924	3.29857	3.97241	7.91907	4.30677	4.36462	5.38536	3.61994	7.21277	5.43451	4.31582	5.22574
Chr1:52109851-52111050	1	52109851	52111050	NA	OSBPL9-202	ENSP00000360775	oxysterol binding protein-like 9 [Source:HGNC Symbol;Acc:16386]	+	CDS	overlapping	0	5.36288	3.77706	5.63019	7.71796	7.65105	5.99439	5.09288	2.4041	4.50371	3.29857	5.31636	8.57205	4.40631	3.83411	4.3029	5.37482	8.23642	5.71991	4.19029	5.48878
Chr1:52126351-52127550	1	52126351	52127550	NA	OSBPL9-202	ENSP00000360775	oxysterol binding protein-like 9 [Source:HGNC Symbol;Acc:16386]	+	CDS	overlapping	0	5.56452	5.21763	6.41338	5.68648	7.33985	5.31632	5.50792	5.57402	4.85163	5.78399	2.5939	8.55934	4.49942	3.98611	6.85929	4.86786	8.33282	4.68244	3.73086	5.48878
Chr1:52194451-52195950	1	52194451	52195950	NA	OSBPL9-202	ENSP00000360775	oxysterol binding protein-like 9 [Source:HGNC Symbol;Acc:16386]	+	CDS	overlapping	0	8.37187	9.2551	8.98201	8.71276	9.08215	6.49689	8.47535	7.29487	5.36621	6.64906	9.79553	8.71644	5.99127	7.03922	9.1163	9.4013	8.81354	9.46518	4.05279	9.32448
Chr1:52234501-52235400	1	52234501	52235400	NA	OSBPL9-202	ENSP00000360775	oxysterol binding protein-like 9 [Source:HGNC Symbol;Acc:16386]	+	CDS	overlapping	0	5.21088	4.77706	5.01128	4.18398	2.80735	3.99439	3.70056	0.819136	4.85163	4.43607	1.85693	3.54652	5.14328	3.47154	3.53736	0.619936	4.46383	2.43451	5.63775	5.40631
Chr1:52327051-52328100	1	52327051	52328100	NA	NRD1-001	ENSP00000262679	nardilysin (N-arginine dibasic convertase) [Source:HGNC Symbol;Acc:7995]	-	CDS	overlapping	0	4.94785	4.87659	3.37385	2.59902	3.45943	3.73136	3.87049	3.14106	4.2142	3.5616	4.17886	4.1986	3.95885	3.83411	3.38536	1.61994	3.99434	2.01947	0.730862	4.90381
Chr1:52343101-52345650	1	52343101	52345650	NA	NRD1-001	ENSP00000262679	nardilysin (N-arginine dibasic convertase) [Source:HGNC Symbol;Acc:7995]	-	CDS	overlapping	0	10.8643	10.8523	10.2235	10.3064	10.0768	10.289	10.5847	9.70483	10.6971	10.6926	10.2957	10.1443	10.7003	10.6415	10.0131	10.1415	9.97514	10.3741	10.4278	10.724
Chr1:52362151-52364700	1	52362151	52364700	NA	null					Not found	0	7.53281	8.72459	6.41338	4.29946	8.24793	4.86886	6.89039	5.94842	5.62924	7.02103	7.62952	10.4257	7.93405	7.87364	7.99022	7.50258	9.77973	7.48979	6.92069	8.13903
Chr1:52407001-52408050	1	52407001	52408050	NA	RAB3B-001	ENSP00000360718	RAB3B, member RAS oncogene family [Source:HGNC Symbol;Acc:9778]	-	CDS	overlapping	0	4.84831	5.21763	3.01128	2.18398	5	2.40943	5.09288	0.819136	4.2142	2.97664	2.27197	2.73916	5.3574	3.83411	6.28153	2.61994	2.29391	4.60443	3.73086	6.31885
Chr1:52421851-52422900	1	52421851	52422900	NA	RAB3B-001	ENSP00000360718	RAB3B, member RAS oncogene family [Source:HGNC Symbol;Acc:9778]	-	CDS	overlapping	0	9.31242	9.87057	5.11082	5.05845	6.06609	5.31632	7.12683	4.27857	5.68813	8.32537	3.97241	4.98709	8.71374	8.97706	6.12233	3.94186	5.2008	7.35337	8.27002	8.90381
Chr1:52455901-52456950	1	52455901	52456950	NA	null					Not found	0	7.80914	8.60633	6.13467	2.59902	6.40939	6.24232	6.96735	5.81914	6.36621	7.66314	6.38049	6.71644	7.57624	7.49707	6.53736	7.07937	6.35999	7.06387	6.56375	7.48878
Chr1:52498651-52500150	1	52498651	52500150	NA	TXNDC12-001	ENSP00000360688	thioredoxin domain containing 12 (endoplasmic reticulum) [Source:HGNC Symbol;Acc:24626]	-	CDS	overlapping	0	9.45458	9.19852	9.07121	8.90736	8.91588	9.56425	9.53345	8.31898	9.60652	9.76127	9.53171	9.05205	9.36051	9.35418	9.20696	9.09161	8.77772	9.15561	9.2066	9.25549
Chr1:52592851-52593750	1	52592851	52593750	NA	null					Not found	0	3.04096	4.29163	4.37385	3.18398	3.32193	1.99439	4.50792	2.4041	5.13174	4.14656	2.27197	3.54652	3.82135	2.66418	0.215436	3.61994	2.87887	4.24186	3.05279	5.90381
Chr1:52605151-52606500	1	52605151	52606500	NA	null					Not found	0	5.21088	5.42913	7.46132	7.29946	8.53528	5.86886	4.02249	4.14106	3.3662	5.14656	3.27197	7.27832	4.30677	4.98611	7.61632	4.2049	7.06209	5.13495	4.81832	6.07374
Chr1:52708501-52709550	1	52708501	52709550	NA	ZFYVE9-002	ENSP00000349737	zinc finger, FYVE domain containing 9 [Source:HGNC Symbol;Acc:6775]	+	CDS	overlapping	0	3.36288	4.55466	4.72749	2.59902	3.16992	3.57936	3.70056	3.62649	4.62924	2.5616	0.271968	3.54652	4.19986	4.12361	1.21544	0.619936	0.293905	4.24186	3.90079	5.22574
Chr1:52753651-52754550	1	52753651	52754550	NA	ZFYVE9-002	ENSP00000349737	zinc finger, FYVE domain containing 9 [Source:HGNC Symbol;Acc:6775]	+	CDS	overlapping	0	3.62592	0.969701	3.78889	2.92094	3.16992	4.49689	4.50792	2.4041	4.50371	3.29857	1.85693	5.49405	2.82135	2.24914	3.38536	2.2049	4.93776	4.82683	3.05279	5.64078
Chr1:52830151-52832850	1	52830151	52832850	NA	CC2D1B-202	ENSP00000360631	coiled-coil and C2 domain containing 1B [Source:HGNC Symbol;Acc:29386]	-	CDS	overlapping	0	9.76547	9.71117	9.63019	9.48776	9.65642	9.45109	9.68356	8.8906	10.3389	9.70115	10.0269	9.25486	9.93405	9.77271	9.63118	9.80976	9.31071	9.79206	9.37472	10.1165
Chr1:52868701-52871250	1	52868701	52871250	NA	PRPF38A-002	ENSP00000257181	PRP38 pre-mRNA processing factor 38 (yeast) domain containing A [Source:HGNC Symbol;Acc:25930]	+	CDS	overlapping	0	10.331	10.4475	9.82964	9.79131	9.77149	9.80604	9.91488	9.18108	10.428	10.0878	9.78174	9.19037	10.3355	10.1877	9.88609	9.51172	8.69478	10.0784	9.44854	10.1984
Chr1:53039851-53041200	1	53039851	53041200	NA	null					Not found	0	4.7414	3.55466	7.93185	7.79869	8.44708	7.13735	4.78803	5.46299	4.95117	5.43607	5.79553	4.4396	5.54381	5.30804	8.02922	6.76968	4.54183	5.75644	5.31582	6.74511
Chr1:53124151-53126100	1	53124151	53126100	NA	FAM159A-004	ENSP00000429726	family with sequence similarity 159, member A [Source:HGNC Symbol;Acc:28757]	+	CDS	upstream	1439	5.68481	5.67014	6.24832	4.68648	5.49185	4.99439	6.82985	1.81914	5.43659	5.97664	4.79553	4.98709	5.19986	5.24914	3.91588	5.32038	1.87887	5.60443	4.81832	6.31885
Chr1:53140051-53141100	1	53140051	53141100	NA	null					Not found	0	3.04096	4.87659	4.37385	3.40637	4.16993	4.10987	4.78803	2.4041	5.2142	5.0641	3.27197	4.82663	4.58688	5.18774	3.53736	2.61994	3.75334	5.38871	3.90079	6.31885
Chr1:53163151-53164950	1	53163151	53164950	NA	SELRC1-001	ENSP00000360593	Sel1 repeat containing 1 [Source:HGNC Symbol;Acc:25716]	-	CDS	overlapping	0	9.09081	9.72459	8.95881	8.09886	8.91289	8.03879	9.10144	7.5606	9.99847	9.56535	9.64918	8.60335	9.40631	9.31164	8.83749	8.62556	8.67328	9.65125	8.83415	9.4686
Chr1:53191501-53193150	1	53191501	53193150	NA	ZYG11B-001	ENSP00000294353	zyg-11 homolog B (C. elegans) [Source:HGNC Symbol;Acc:25820]	+	CDS	overlapping	0	9.13371	9.83698	8.92844	8.73857	8.42206	8.52837	9.31159	8.0383	9.69533	9.78077	9.34075	8.34649	9.44193	9.41907	8.80415	8.85834	8.72436	9.1894	9.136	9.3132
Chr1:53279851-53280750	1	53279851	53280750	NA	ZYG11B-001	ENSP00000294353	zyg-11 homolog B (C. elegans) [Source:HGNC Symbol;Acc:25820]	+	CDS	overlapping	0	4.84831	4.29163	4.72749	3.18398	2.80735	3.40943	5.02249	1.81914	3.62924	1.97664	3.27197	3.73916	3.49942	2.98611	3.8004	2.94186	1.29391	2.01947	2.73086	5.56678
Chr1:53298901-53299800	1	53298901	53299800	NA	null					Not found	0	4.62592	3.77706	7.31245	5.95657	7.42626	5.57936	2.28553	5.21145	3.04428	3.78399	2.5939	2.73916	4.19986	3.66418	5.12233	5.32038	2.61583	5.07836	1.73086	4.48878
Chr1:53325901-53326950	1	53325901	53326950	NA	ZYG11A-001	ENSP00000360583	zyg-11 homolog A (C. elegans) [Source:HGNC Symbol;Acc:32058]	+	CDS	overlapping	0	3.62592	4.67014	4.20393	3.40637	3.45943	2.99439	4.50792	3.62649	3.85163	3.97664	0.271968	2.32413	4.66934	5.36462	3.21544	2.94186	3.10126	3.24186	3.90079	4.1262
Chr1:53386501-53388000	1	53386501	53388000	NA	ECHDC2-002	ENSP00000360577	enoyl CoA hydratase domain containing 2 [Source:HGNC Symbol;Acc:23408]	-	CDS	overlapping	0	5.50039	4.67014	8.84417	8.84219	8.78464	8.71777	6.6313	8.14106	5.2142	3.78399	9.01006	5.13148	6.56551	5.0565	8.80415	8.15132	6.57931	6.43451	4.63775	5.77828
Chr1:53479801-53481150	1	53479801	53481150	NA	SCP2-001	ENSP00000360569	sterol carrier protein 2 [Source:HGNC Symbol;Acc:10606]	+	CDS	overlapping	0	8.67031	8.22709	7.65514	8.08283	7.40088	8.15762	8.31527	7.12292	7.58344	8.09558	6.53875	7.68168	8.75681	8.22642	8.30819	6.82939	8.03537	7.95021	7.94032	8.74512
Chr1:53611351-53612700	1	53611351	53612700	NA	SLC1A7-001	ENSP00000360549	solute carrier family 1 (glutamate transporter), member 7 [Source:HGNC Symbol;Acc:10945]	-	CDS	downstream	3230	6.43327	6.55466	8.06811	7.6543	8.14975	7.72231	5.91002	5.67712	6.04428	5.88353	5.12995	9.22298	6.19986	5.57107	7.69925	8.10375	9.20679	7.14875	6.58884	8.36325
Chr1:53647501-53648550	1	53647501	53648550	NA	null					Not found	0	3.36288	4.29163	5.11082	5.18398	7	6.81882	4.401	3.98906	5.85163	3.5616	2.27197	5.32413	4.74735	2.98611	5.3029	4.32038	4.81747	5.13495	3.31582	6.01929
Chr1:53661751-53663550	1	53661751	53663550	NA	CPT2-001	ENSP00000360541	carnitine palmitoyltransferase 2 [Source:HGNC Symbol;Acc:2330]	+	CDS	overlapping	0	9.57623	9.46955	9.33835	8.9697	9.10329	9.47013	9.38356	9.02859	9.99556	9.40709	9.64483	8.95348	9.73304	9.56203	9.27072	9.27457	9.05546	9.66333	9.22672	9.96631
Chr1:53685301-53686950	1	53685301	53686950	NA	C1orf123-001	ENSP00000294360	chromosome 1 open reading frame 123 [Source:HGNC Symbol;Acc:26059]	-	CDS	overlapping	0	9.93577	10.0358	9.54378	9.40959	9.28077	9.57434	10.0157	9.75577	10.5969	9.87751	9.60736	9.28606	9.99127	9.79089	9.59698	9.49338	9.2481	9.69425	9.87041	9.99833
Chr1:53703451-53705250	1	53703451	53705250	NA	MAGOH-001	ENSP00000360525	mago-nashi homolog, proliferation-associated (Drosophila) [Source:HGNC Symbol;Acc:6815]	-	CDS	overlapping	0	9.56452	9.58809	9.47772	9.0461	8.75489	9.42345	9.25898	9.8717	10.2292	9.47648	9.67711	8.55295	9.67435	9.65287	9.41019	9.13957	8.48866	9.4175	9.09281	9.91504
Chr1:53743501-53744550	1	53743501	53744550	NA	LRP8-001	ENSP00000303634	low density lipoprotein receptor-related protein 8, apolipoprotein e receptor [Source:HGNC Symbol;Acc:6700]	-	CDS	overlapping	0	4.50039	5.29163	5.63019	4.05845	4	5.05329	5.15999	2.81914	7.62924	4.14656	5.17886	2.73916	5.25431	4.83411	3.67487	4.78986	3.99434	4.3414	5.05279	5.71117
Chr1:53846851-53848500	1	53846851	53848500	NA	null					Not found	0	4.50039	6.36202	4.72749	5.7283	7.32193	5.26741	5.45545	6.27857	6.04428	4.5616	3.27197	6.06109	4.74735	4.66418	4.38536	4.61994	5.2481	5.79206	5.4313	7.42737
Chr1:53858701-53859900	1	53858701	53859900	NA	null					Not found	0	5.21088	6.09898	5.41338	4.40637	5.52356	5.76698	5.98597	4.81914	7.70249	6.22457	4.27197	3.90909	5.66934	5.36462	5.02279	5.26379	5.10126	7.30487	6.05279	8.08703
Chr1:53878201-53880150	1	53878201	53880150	NA	null					Not found	0	6.71338	6.01409	7.65514	7.78884	9.08481	9.46742	8.10995	8.37372	6.62924	7.93083	6.24925	7.06109	7.39424	5.36462	8.96027	9.44648	7.98041	7.41179	9.91326	9.38494
Chr1:53935351-53936550	1	53935351	53936550	NA	DMRTB1-001	ENSP00000360500	DMRT-like family B with proline-rich C-terminal, 1 [Source:HGNC Symbol;Acc:13913]	+	CDS	upstream	3016	5.56452	4.55466	3.90437	4.18398	4.64386	4.40943	4.87049	4.27857	7.06664	4.43607	4.35943	4.32413	5.54381	3.47154	3.67487	4.86786	3.99434	4.68244	5.53822	7.22574
Chr1:53950651-53951850	1	53950651	53951850	NA	null					Not found	0	4.62592	4.9697	4.84778	3.59902	4.32193	5.45382	5.45545	5.06706	9.47054	5.93083	6.31636	3.73916	5.3574	4.12361	2.8004	6.29236	4.38137	5.79206	4.4313	7.62263
Chr1:54007201-54008550	1	54007201	54008550	NA	GLIS1-001	ENSP00000309653	GLIS family zinc finger 1 [Source:HGNC Symbol;Acc:29525]	-	CDS	overlapping	0	4.7414	4.87659	7.47071	9.23564	9.35535	9.75594	6.82985	8.04795	10.5341	7.66314	9.8756	4.32413	9.65424	6.70858	8.31872	9.90765	6.84849	5.9891	5.19029	6.93356
Chr1:54150601-54152250	1	54150601	54152250	NA	null					Not found	0	5.84831	5.61356	4.90437	4.40637	5.49185	6.47552	5.82985	7.49156	8.1528	5.88353	7.26065	9.7193	7.22734	5.12361	4.739	5.1435	9.62706	5.9891	4.63775	7.93356
Chr1:54302551-54304800	1	54302551	54304800	NA	TMEM48-001	ENSP00000360483	transmembrane protein 48 [Source:HGNC Symbol;Acc:25525]	-	CDS	overlapping	0	10.0522	10.362	9.48933	9.34721	9.36851	9.32232	9.73399	9.66149	10.1632	9.88353	9.7916	9.18211	9.99127	9.8614	9.51006	9.56538	9.08507	9.7013	9.62265	9.96631
Chr1:54354151-54356700	1	54354151	54356700	NA	YIPF1-001	ENSP00000432266	Yip1 domain family, member 1 [Source:HGNC Symbol;Acc:25231]	-	CDS	overlapping	0	8.67758	8.42913	8.67153	9.35056	9.04985	8.95632	8.58931	8.78492	8.08867	8.80953	8.83039	8.19037	9.40931	8.45208	9.06093	8.46543	8.52752	8.93833	8.60738	8.70255
Chr1:54422251-54423600	1	54422251	54423600	NA	LRRC42-002	ENSP00000360421	leucine rich repeat containing 42 [Source:HGNC Symbol;Acc:28792]	+	CDS	overlapping	0	5.21088	5.29163	6.99834	4.50591	7.12928	6.63825	5.82985	5.27857	7.47054	4.67708	1.85693	7.60953	5.85697	4.66418	5.34472	4.7074	6.22464	5.43451	6.08841	6.44813
Chr1:54481051-54483000	1	54481051	54483000	NA	LDLRAD1-002	ENSP00000360413	low density lipoprotein receptor class A domain containing 1 [Source:HGNC Symbol;Acc:32069]	-	CDS	overlapping	0	5.21088	4.67014	4.66336	4.40637	5	5.16432	4.94849	5.72603	5.13174	3.97664	3.85693	4.4396	5.49942	3.98611	3.02279	4.07937	4.10126	5.79206	4.53822	6.5283
Chr1:54517651-54520500	1	54517651	54520500	NA	TMEM59-001	ENSP00000234831	transmembrane protein 59 [Source:HGNC Symbol;Acc:1239]	-	CDS	overlapping	0	10.1442	10.2735	9.70178	9.62968	9.50581	10.1743	10.0581	9.71698	10.9868	10.3473	10.055	9.60335	10.1999	10.0217	9.75459	9.95756	9.75743	9.94824	10.2661	10.1581
Chr1:54623101-54624600	1	54623101	54624600	NA	CDCP2-001	ENSP00000360381	CUB domain containing protein 2 [Source:HGNC Symbol;Acc:27297]	-	CDS	downstream	4506	3.36288	5.29163	5.56148	6.48166	7.8392	3.57936	5.87049	3.62649	7.34806	4.43607	4.85693	4.98709	4.58688	4.98611	7.65006	5.57413	3.29391	6.29249	4.4313	7.01929
Chr1:54633151-54634200	1	54633151	54634200	NA	AL357673.1-201	ENSP00000438279	CDNA: FLJ21031 fis, clone CAE07336HCG1780521Uncharacterized protein [Source:UniProtKB/TrEMBL;Acc:Q9H7D2]	-	CDS	upstream	2564	4.84831	4.29163	6.11082	2.92094	6.2854	5.40943	5.09288	4.72603	5.2922	2.97664	4.66429	4.98709	4.49942	3.83411	4.12233	7.17453	5.38137	5.89394	3.31582	6.22574
Chr1:54664801-54667200	1	54664801	54667200	NA	MRPL37-001	ENSP00000354086	mitochondrial ribosomal protein L37 [Source:HGNC Symbol;Acc:14034]	+	CDS	overlapping	0	9.72395	10.1093	9.51908	8.97406	9.08215	9.3578	9.401	9.60377	10.415	9.86842	9.74364	8.89903	9.81003	9.49707	9.15502	9.30293	8.81747	9.70364	9.2066	9.8925
Chr1:54692551-54693750	1	54692551	54693750	NA	SSBP3-013	ENSP00000414361	single stranded DNA binding protein 3 [Source:HGNC Symbol;Acc:15674]	-	CDS	overlapping	0	5.43327	5.29163	6.75852	6.8658	7.6865	7.13735	5.65476	6.6005	7.2341	6.85928	6.12995	6.29375	6.92568	5.83411	6.62483	6.55067	7.55129	6.01947	6.37472	7.10021
Chr1:54714451-54716250	1	54714451	54716250	NA	SSBP3-013	ENSP00000414361	single stranded DNA binding protein 3 [Source:HGNC Symbol;Acc:15674]	-	CDS	overlapping	0	5.94785	5.13963	7.23735	6.5763	8.23362	7.49689	5.94849	6.81914	6.7167	5.29857	6.62952	7.79445	8.98324	5.70858	6.98362	6.4013	8.80566	6.75644	5.63775	6.90381
Chr1:54718651-54720000	1	54718651	54720000	NA	SSBP3-013	ENSP00000414361	single stranded DNA binding protein 3 [Source:HGNC Symbol;Acc:15674]	-	CDS	overlapping	0	4.21088	3.9697	7.4231	7.10681	8.21432	7.42066	5.74496	4.62649	6.7167	5.29857	5.17886	8.36122	5.78482	4.91211	7.00985	6.99498	8.71176	4.89394	4.97879	6.90381
Chr1:54842101-54843600	1	54842101	54843600	NA	SSBP3-002	ENSP00000360371	single stranded DNA binding protein 3 [Source:HGNC Symbol;Acc:15674]	-	CDS	overlapping	0	5.62592	5.9239	5.48933	4.50591	5.49185	5.16432	5.74496	4.27857	6.50371	5.43607	3.97241	4.4396	5.78482	4.98611	2.53736	4.32038	3.46383	8.71528	6.08841	6.99128
Chr1:54872701-54875700	1	54872701	54875700	NA	SSBP3-002	ENSP00000360371	single stranded DNA binding protein 3 [Source:HGNC Symbol;Acc:15674]	-	CDS	downstream	1020	8.80914	9.00312	9.12279	8.55321	9.04166	9.29207	9.4454	8.15005	9.7722	8.88953	10.0235	8.71071	9.29058	9.19946	8.37025	9.42729	9.37339	9.94032	9.46895	10.4737
Chr1:54886501-54887550	1	54886501	54887550	NA	null					Not found	0	3.36288	3.77706	4.95882	5.05845	6.70044	6.36363	4.87049	3.14106	4.95117	2.5616	3.7314	3.90909	4.08438	3.98611	6.46336	3.42729	2.87887	4.95807	2.31582	5.96271
Chr1:55029451-55031100	1	55029451	55031100	NA	ACOT11-002	ENSP00000340260	acyl-CoA thioesterase 11 [Source:HGNC Symbol;Acc:18156]	+	CDS	overlapping	0	4.21088	3.77706	4.52586	2.59902	2.80735	4.10987	5.28553	2.4041	5.62924	3.97664	5.07932	2.32413	4.30677	4.75164	4.12233	3.61994	3.10126	5.4789	4.4313	5.64078
Chr1:55137301-55138500	1	55137301	55138500	NA	HEATR8-004	ENSP00000410192	HEAT repeat containing 8 [Source:HGNC Symbol;Acc:24802]	+	CDS	overlapping	0	4.21088	4.9697	4.45186	3.40637	2.58496	3.86886	4.15999	2.81914	5.50371	2.5616	3.5939	3.32413	5.25431	3.83411	2.53736	2.94186	1.87887	4.52197	4.53822	6.40631
Chr1:55180801-55182300	1	55180801	55182300	NA	HEATR8-202	ENSP00000403054	HEAT repeat containing 8 [Source:HGNC Symbol;Acc:24802]	+	CDS	overlapping	0	8.65567	8.86452	8.73531	8.5648	8.84235	8.83988	8.6372	9.15005	9.23903	8.87146	8.99989	8.31659	9.16475	8.70858	9.06093	8.93282	8.12045	9.10693	8.42435	9.08703
Chr1:55229401-55230900	1	55229401	55230900	NA	PARS2-001	ENSP00000360327	prolyl-tRNA synthetase 2, mitochondrial (putative) [Source:HGNC Symbol;Acc:30563]	-	CDS	downstream	4567	9.20083	9.24582	8.85139	8.50591	8.71081	8.81031	8.99977	8.67089	8.72376	8.74482	9.11746	8.15702	9.06166	8.7031	8.76618	8.45283	8.12045	9.00436	8.80768	8.80267
Chr1:55259851-55261500	1	55259851	55261500	NA	TTC22-002	ENSP00000360323	tetratricopeptide repeat domain 22 [Source:HGNC Symbol;Acc:26067]	-	CDS	overlapping	0	4.04096	3.9697	4.72749	3.59902	4.64386	4.65736	5.15999	5.06706	5.36621	5.22457	5.31636	5.4396	6.49942	5.0565	3.67487	3.94186	5.3383	5.64396	3.05279	7.1262
Chr1:55266601-55268100	1	55266601	55268100	NA	TTC22-002	ENSP00000360323	tetratricopeptide repeat domain 22 [Source:HGNC Symbol;Acc:26067]	-	CDS	overlapping	0	4.62592	4.29163	5.29139	5.3539	5.24793	4.80175	5.22412	3.98906	5.04428	4.29857	3.44189	4.54652	4.40631	3.24914	5.50084	4.94186	0.293905	4.13495	3.53822	5.64078
Chr1:55272601-55273800	1	55272601	55273800	NA	C1orf177-001	ENSP00000350924	chromosome 1 open reading frame 177 [Source:HGNC Symbol;Acc:26854]	+	CDS	overlapping	0	3.04096	4.13963	6.06191	2.92094	6.98869	5.31632	4.94849	4.72603	5.13174	4.78399	5.76382	3.06109	4.74735	4.24914	4.02279	5.1435	3.75334	4.82683	3.73086	6.31885
Chr1:55321501-55322850	1	55321501	55322850	NA	DHCR24-001	ENSP00000360316	24-dehydrocholesterol reductase [Source:HGNC Symbol;Acc:2859]	-	CDS	overlapping	0	4.84831	4.67014	7.53484	5.55321	7.46761	6.57936	5.65476	5.4041	4.62924	5.62049	4.91582	8.00595	5.08438	4.47154	6.81535	4.2049	7.73685	4.75644	4.05279	5.64078
Chr1:55351651-55353900	1	55351651	55353900	NA	DHCR24-001	ENSP00000360316	24-dehydrocholesterol reductase [Source:HGNC Symbol;Acc:2859]	-	CDS	overlapping	0	10.1932	10.6492	9.70974	9.36057	9.68124	10.122	9.76934	6.72603	11.0129	9.90442	10.5458	9.64906	10.3512	10.3277	10.4431	10.2994	9.56303	10.1245	8.76978	10.2377
Chr1:55410451-55411950	1	55410451	55411950	NA	null					Not found	0	5.04096	4.55466	6.01128	4.84694	5.20945	4.73136	5.50792	3.4041	6.2142	5.14656	5.12995	5.90909	5.74735	4.66418	6.12233	5.32038	4.99434	6.8439	5.68506	7.20149
Chr1:55436251-55437900	1	55436251	55437900	NA	null					Not found	0	5.43327	3.55466	5.01128	4.68648	5.55459	5.16432	4.78803	3.62649	5.43659	4.5616	3.85693	4.73916	4.82135	4.36462	3.21544	3.78986	4.75334	6.58426	3.90079	7.76179
Chr1:55461301-55462800	1	55461301	55462800	NA	BSND-001	ENSP00000360312	Bartter syndrome, infantile, with sensorineural deafness (Barttin) [Source:HGNC Symbol;Acc:16512]	+	CDS	downstream	2060	3.84831	4.13963	4.59625	3.76894	5	4.80175	4.60745	4.14106	4.74472	4.43607	4.91582	4.98709	4.30677	3.24914	5.16963	3.94186	5.46383	6.24186	4.90079	6.01929
Chr1:55486651-55488450	1	55486651	55488450	NA	null					Not found	0	6.9236	6.32725	6.83328	5.29946	6.37504	5.73136	6.401	3.62649	6.50371	5.43607	6.35943	6.52052	6.89174	5.52216	3.91588	5.86786	6.27118	7.96589	6.51222	7.77828
Chr1:55742701-55743900	1	55742701	55743900	NA	null					Not found	0	6.59554	7.30955	5.56148	5.457	7.57743	4.57936	7.05812	4.98906	7.62924	8.18609	6.90132	6.02457	6.22734	7.07357	8.45384	4.42729	6.50336	5.60443	6.19029	8.31885
Chr1:55886701-55887600	1	55886701	55887600	NA	null					Not found	0	4.62592	2.55466	3.20393	1.59902	3.45943	3.21679	4.28553	5.86353	5.13174	2.5616	4.17886	4.4396	3.08438	4.12361	1.8004	2.61994	4.10126	4.89394	2.73086	4.1262
Chr1:55893751-55895850	1	55893751	55895850	NA	null					Not found	0	5.79584	4.87659	7.08657	3.40637	8.82018	8.57434	5.65476	7.66463	6.17356	4.67708	7.42172	9.97518	5.58688	4.91211	8.38034	8.00364	9.69265	5.64396	4.97879	6.96271
Chr1:55908901-55909950	1	55908901	55909950	NA	null					Not found	0	5.68481	4.77706	4.52586	2.18398	5.49185	7.34017	4.87049	7.53338	9.63673	4.78399	2.5939	8.57837	6.87446	6.73027	4.91588	5.01225	8.44872	4.43451	4.97879	6.17683
Chr1:55938001-55939500	1	55938001	55939500	NA	null					Not found	0	4.94785	4.42913	4.45186	0.599017	4.08746	6.55918	5.65476	5.27857	5.95117	3.78399	0.271968	6.02457	5.25431	3.47154	3.21544	2.61994	6.84849	4.68244	4.31582	6.64078
Chr1:56038501-56039550	1	56038501	56039550	NA	null					Not found	0	8.64829	5.49326	6.71172	2.59902	7.06609	6.19079	8.42166	7.38899	5.68813	7.5002	5.22616	6.54652	7.61836	7.85401	7.07342	7.34786	6.86376	7.30487	8.30072	8.48878
Chr1:56046151-56047200	1	56046151	56047200	NA	null					Not found	0	9.05218	6.64213	8.28608	3.40637	7.22882	8.29817	8.22412	7.44849	6.2142	7.87146	6.7477	7.2149	6.99127	7.97706	8.33956	7.21985	7.07526	5.4789	8.87552	7.27305
Chr1:56247151-56248200	1	56247151	56248200	NA	null					Not found	0	5.94785	3.77706	7.95882	4.50591	7.92481	6.08186	5.74496	8.31099	6.95117	5.0641	4.79553	3.90909	5.3574	5.87364	8.82646	7.84875	4.46383	4.01947	7.05279	6.5283
Chr1:56890651-56891550	1	56890651	56891550	NA	null					Not found	0	6.08535	6.55466	5.63019	5.59902	7.65105	4.40943	5.28553	6.21145	5.2142	5.43607	3.97241	5.69336	7.43016	5.36462	8.62058	5.42729	6.73685	7.04922	5.63775	7.94821
Chr1:56921851-56923200	1	56921851	56923200	NA	null					Not found	0	4.21088	4.55466	3.90437	3.59902	4.75489	3.73136	5.09288	3.81914	5.56784	4.43607	0.271968	2.32413	3.82135	4.98611	8.80789	3.78986	2.61583	5.13495	2.73086	6.17683
Chr1:56982001-56983500	1	56982001	56983500	NA	PPAP2B-001	ENSP00000360296	phosphatidic acid phosphatase type 2B [Source:HGNC Symbol;Acc:9229]	-	CDS	overlapping	0	7.97169	8.08864	8.86926	8.36057	8.82972	5.10987	7.31527	8.94842	5.2922	8.73153	6.35943	4.98709	8.88744	6.59492	9.32918	7.65336	4.81747	7.1894	9.93788	8.94821
Chr1:57050251-57051150	1	57050251	57051150	NA	null					Not found	0	4.50039	5.72459	4.78889	3.76894	4.80735	4.21679	4.94849	4.51958	6.68813	3.78399	0.271968	4.32413	5.45362	4.47154	5.50084	2.2049	4.75334	5.07836	4.90079	6.40631
Chr1:57142201-57142800	1	57142201	57142800	NA	PRKAA2-001	ENSP00000360290	protein kinase, AMP-activated, alpha 2 catalytic subunit [Source:HGNC Symbol;Acc:9377]	+	CDS	overlapping	0	5.43327	3.77706	4.01128	6.93887	6.97728	3.40943	5.15999	6.9066	4.36621	5.29857	1.27197	4.1986	5.3574	3.24914	6.77003	5.57413	4.46383	3.01947	6.92069	4.48878
Chr1:57153751-57155100	1	57153751	57155100	NA	PRKAA2-001	ENSP00000360290	protein kinase, AMP-activated, alpha 2 catalytic subunit [Source:HGNC Symbol;Acc:9377]	+	CDS	overlapping	0	4.04096	4.29163	6.95882	8.16126	8.09803	5.99439	5.28553	6.06706	5.74472	4.29857	0.271968	5.69336	3.82135	3.66418	7.97699	4.86786	6.7033	5.29249	5.05279	4.31885
Chr1:57297451-57298500	1	57297451	57298500	NA	null					Not found	0	1.04096	3.29163	5.56148	3.76894	4	4.57936	4.50792	2.4041	7.59887	3.97664	0.271968	7.30902	3.30677	4.91211	5.60775	5.7074	7.21277	5.29249	4.81832	4.48878
Chr1:58860751-58861800	1	58860751	58861800	NA	null					Not found	0	6.21088	4.55466	9.01128	9.20264	8.93369	8.93691	7.27042	5.46299	5.13174	6.36896	5.22616	9.00595	8.04631	5.36462	8.71926	8.16683	8.65585	9.03814	7.69665	6.31885
Chr1:59011201-59013150	1	59011201	59013150	NA	null					Not found	0	10.1677	10.1595	9.58979	9.46938	9.26913	9.77357	9.99518	9.72	10.6917	9.87146	9.62291	9.67285	10.2987	9.9002	9.64589	9.60293	9.68407	9.73372	10.1445	9.98419
Chr1:59057851-59058900	1	59057851	59058900	NA	null					Not found	0	6.04096	5.61356	6.18121	5.12258	5.20945	5.49689	4.401	4.98906	10.0941	3.29857	2.5939	6.94862	7.91727	4.47154	4.46336	4.52683	7.22464	4.3414	5.86015	7.93356
Chr1:59164951-59166300	1	59164951	59166300	NA	MYSM1-001	ENSP00000418734	Myb-like, SWIRM and MPN domains 1 [Source:HGNC Symbol;Acc:29401]	-	CDS	overlapping	0	8.98932	9.21763	9.2263	9.22107	8.93369	9.18092	9.19642	8.94842	9.22915	8.90145	9.51037	8.8372	9.35117	9.03922	9.14025	9.20865	8.54657	9.28313	8.71955	9.37413
Chr1:59192551-59193900	1	59192551	59193900	NA	null					Not found	0	7.17024	3.77706	9.00806	8.59902	8.9542	8.78012	7.22412	6.21145	7.11037	6.22457	8.24925	9.27055	6.64917	4.66418	9.17544	8.55657	8.59311	7.22892	7.74209	6.22574
Chr1:59205151-59206350	1	59205151	59206350	NA	null					Not found	0	6.32636	4.13963	5.52586	5.59902	5	6.94859	5.82985	5.46299	6.87717	4.14656	2.27197	6.46708	7.53284	3.98611	6.2378	4.86786	7.39194	7.00436	6.22271	7.04677
Chr1:59220451-59222100	1	59220451	59222100	NA	null					Not found	0	10.1805	7.34474	9.65514	10.2211	9.85643	9.80389	9.89532	9.88523	9.23903	9.5691	9.05333	9.84507	10.116	9.6557	9.87186	9.39143	9.46383	9.52991	9.55423	9.37413
Chr1:59234551-59235600	1	59234551	59235600	NA	null					Not found	0	5.94785	4.67014	6.11082	6.02528	6.45943	7.50746	5.34442	5.14106	6.25373	3.29857	4.5939	7.36852	6.43016	4.36462	6.14617	6.42729	8.12679	7.13495	5.94032	6.87344
Chr1:59288701-59290050	1	59288701	59290050	NA	null					Not found	0	5.56452	4.67014	6.29139	4.99133	5.42626	5.31632	4.78803	4.62649	5.13174	4.5616	3.44189	8.36122	5.49942	4.47154	5.46336	6.1435	8.88262	6.21587	4.19029	6.22574
Chr1:59313751-59315850	1	59313751	59315850	NA	null					Not found	0	9.93577	7.64213	10.2011	9.61024	9.91289	9.85651	9.43527	9.81632	9.34348	9.0694	7.31636	10.3992	10.1469	9.52837	10.3292	9.77728	10.2939	8.91024	9.86785	9.23174
Chr1:59368651-59370600	1	59368651	59370600	NA	null					Not found	0	9.96577	8.99207	9.69177	9.68648	9.7211	10	9.35161	9.66776	10.1864	8.97664	9.82079	9.64906	10.1807	8.91211	9.74877	9.88203	9.70542	9.99484	9.48575	8.07374
Chr1:59394901-59396400	1	59394901	59396400	NA	null					Not found	0	6.21088	4.9697	6.29139	4.05845	6.53916	4.99439	6.19242	3.98906	4.85163	5.14656	4.97241	3.90909	5.78482	5.66418	6.9968	6.4013	4.87887	6.58426	4.53822	8.29613
Chr1:59397901-59399700	1	59397901	59399700	NA	null					Not found	0	6.25041	6.55466	6.90437	6.05845	7.24793	6.67622	5.91002	5.14106	6.13174	5.14656	7.21448	7.6699	6.3574	5.61838	6.07342	5.78986	8.23054	7.21587	5.4313	8.85023
Chr1:59481151-59482050	1	59481151	59482050	NA	null					Not found	0	6.39851	4.67014	7.38384	5.12258	6.58496	6.90128	5.55854	5.98906	6.36621	5.5616	4.44189	7.94862	8.88744	5.52216	6.69117	8.27099	8.15809	7.24186	6.94032	7.91876
Chr1:59604601-59605800	1	59604601	59605800	NA	null					Not found	0	5.68481	4.87659	6.33321	5.7283	7.22882	7.32829	6.28553	5.14106	5.04428	4.14656	5.44189	6.06109	6.92568	5.91211	5.70729	7.34786	6.38137	6.77436	5.4313	7.24959
Chr1:59608351-59609550	1	59608351	59609550	NA	null					Not found	0	5.94785	4.29163	8.65926	8.78389	9.07682	8.8315	5.98597	7.14106	5.2142	5.22457	2.85693	9.13577	7.8123	5.83411	8.36009	8.4903	8.87133	6.45688	6.56375	7.15174
Chr1:59616301-59617650	1	59616301	59617650	NA	null					Not found	0	10.1521	8.4854	9.37135	9.94331	9.26913	9.62132	8.35161	9.48091	7.97501	8.684	8.5939	9.53358	10.1215	8.84409	9.78908	9.80729	9.67328	8.93435	10.084	9.86188
Chr1:59681251-59682150	1	59681251	59682150	NA	null					Not found	0	4.7414	3.77706	4.59625	2.18398	3.58496	5.31632	5.28553	4.62649	4.50371	1.97664	2.85693	3.73916	5.40631	4.66418	5.34472	3.42729	6.04879	5.75644	5.97879	6.60425
Chr1:59755501-59756700	1	59755501	59756700	NA	null					Not found	0	6.62592	4.67014	6.18121	4.68648	6.55459	5.26741	5.74496	5.62649	5.36621	4.67708	3.44189	5.26273	6.56551	5.52216	6.83015	5.47792	5.42319	7.44574	6.40329	6.36324
Chr1:59841001-59841450	1	59841001	59841450	NA	FGGY-007	ENSP00000406607	FGGY carbohydrate kinase domain containing [Source:HGNC Symbol;Acc:25610]	+	CDS	overlapping	0	4.62592	3.77706	6.39375	5.99133	5.32193	4.99439	4.78803	4.27857	3.04428	2.5616	3.5939	6.29375	4.30677	3.24914	6.02279	6.23465	6.50336	4.43451	5.12318	5.31885
Chr1:59892301-59893800	1	59892301	59893800	NA	FGGY-005	ENSP00000360262	FGGY carbohydrate kinase domain containing [Source:HGNC Symbol;Acc:25610]	+	CDS	overlapping	0	5.62592	5.21763	5.45186	6.76894	7.44294	6.47552	6.34442	5.62649	5.43659	4.14656	2.5939	4.1986	6.11413	5.41907	9.10722	6.32038	2.29391	6.2674	4.53822	7.27305
Chr1:59899651-59900700	1	59899651	59900700	NA	FGGY-005	ENSP00000360262	FGGY carbohydrate kinase domain containing [Source:HGNC Symbol;Acc:25610]	+	CDS	overlapping	0	6.32636	4.67014	6.95882	4.99133	5.58496	8.614	5.94849	6.49156	8.3389	4.29857	3.44189	4.06109	7.17184	5.12361	7.12233	6.74922	6.2008	5.86077	6.01626	6.5283
Chr1:59920501-59921550	1	59920501	59921550	NA	FGGY-005	ENSP00000360262	FGGY carbohydrate kinase domain containing [Source:HGNC Symbol;Acc:25610]	+	CDS	overlapping	0	6.62592	6.46155	7.71172	6.99133	7.08746	6.26741	5.74496	7.88522	4.2142	6.26204	3.44189	6.23102	5.66934	4.47154	8.97032	6.1435	6.57931	5.4789	8.2066	6.77828
Chr1:59942551-59943750	1	59942551	59943750	NA	FGGY-005	ENSP00000360262	FGGY carbohydrate kinase domain containing [Source:HGNC Symbol;Acc:25610]	+	CDS	overlapping	0	5.84831	4.42913	8.66336	8.14591	8.53916	6.59926	5.22412	4.4041	5.99847	5.14656	6.40125	6.26273	6.78482	4.66418	9.12833	7.38812	7.18872	6.01947	5.58884	6.31885
Chr1:59949301-59950500	1	59949301	59950500	NA	FGGY-005	ENSP00000360262	FGGY carbohydrate kinase domain containing [Source:HGNC Symbol;Acc:25610]	+	CDS	overlapping	0	6.71338	4.77706	8.11082	7.92993	8.02237	7.16432	5.94849	7.43385	7.2341	6.26204	0.271968	8.36122	7.19986	4.66418	9.09195	4.32038	9.1796	5.1894	8.15713	5.96271
Chr1:60022201-60023100	1	60022201	60023100	NA	FGGY-005	ENSP00000360262	FGGY carbohydrate kinase domain containing [Source:HGNC Symbol;Acc:25610]	+	CDS	overlapping	0	5.21088	5.67014	4.66336	2.92094	1.58496	4.93299	5.78803	3.4041	4.95117	3.78399	4.27197	2.73916	5.19986	4.66418	4.739	3.42729	2.87887	3.89394	5.53822	6.5283
Chr1:60138151-60139350	1	60138151	60139350	NA	FGGY-005	ENSP00000360262	FGGY carbohydrate kinase domain containing [Source:HGNC Symbol;Acc:25610]	+	CDS	overlapping	0	5.50039	5.55466	6.69578	5.84694	6.12928	6.99439	6.05812	6.54706	6.17356	4.67708	5.79553	5.98709	6.8032	4.47154	5.8004	5.90534	6.10126	6.16243	5.68506	7.6587
Chr1:60172501-60173550	1	60172501	60173550	NA	FGGY-005	ENSP00000360262	FGGY carbohydrate kinase domain containing [Source:HGNC Symbol;Acc:25610]	+	CDS	overlapping	0	6.71338	6.55466	8.23183	7.66511	7.71425	8.60419	7.59538	7.63932	6.92692	8.95963	7.23775	8.41864	7.6287	6.85401	9.09502	8.16683	9.2008	7.76543	8.54464	7.44813
Chr1:60195901-60198000	1	60195901	60198000	NA	FGGY-005	ENSP00000360262	FGGY carbohydrate kinase domain containing [Source:HGNC Symbol;Acc:25610]	+	CDS	overlapping	0	9.38081	9.84622	9.75467	10.3489	9.77643	9.60172	9.04486	9.62004	6.74472	9.20546	9.11432	9.53033	8.71374	7.49707	10.2639	9.84635	9.86944	9.48979	10.4313	7.93356
Chr1:60216001-60217050	1	60216001	60217050	NA	FGGY-005	ENSP00000360262	FGGY carbohydrate kinase domain containing [Source:HGNC Symbol;Acc:25610]	+	CDS	overlapping	0	6.32636	6.80259	8.07429	7.52975	7.2854	7.00934	6.05812	5.72603	5.50371	6.95392	5.79553	7.33908	6.02298	4.12361	9.06719	6.29236	8.68622	7.4789	8.40329	6.96271
Chr1:60224701-60225750	1	60224701	60225750	NA	FGGY-005	ENSP00000360262	FGGY carbohydrate kinase domain containing [Source:HGNC Symbol;Acc:25610]	+	CDS	overlapping	0	7.82232	8.11945	7.58763	7.22837	7.04439	8.13735	7.05812	6.79642	8.12109	6.22457	7.81886	7.29375	8.57088	6.27889	8.45861	7.02933	7.86376	8.67291	8.31582	7.93356
Chr1:60279451-60281400	1	60279451	60281400	NA	HOOK1-003	ENSP00000398860	hook homolog 1 (Drosophila) [Source:HGNC Symbol;Acc:19884]	+	CDS	overlapping	0	4.84831	4.67014	4.01128	5.18398	2.32193	3.40943	3.87049	3.14106	9.13174	3.78399	6.10486	3.54652	4.40631	4.24914	3.67487	4.7074	3.10126	4.75644	4.90079	5.01929
Chr1:60412801-60413400	1	60412801	60413400	NA	null					Not found	0	2.62592	2.55466	3.52586	2.59902	1.58496	3.99439	4.15999	4.14106	4.50371	3.5616	0.271968	3.54652	3.49942	3.98611	3.21544	2.94186	4.38137	4.68244	5.05279	3.90381
Chr1:60436801-60437700	1	60436801	60437700	NA	null					Not found	0	5.7414	5.87659	5.24832	3.76894	3	7.1509	6.76665	6.2454	10.1157	6.85928	5.35943	5.94862	7.83927	7.33661	3.02279	6.34786	5.81747	6.45688	6.19029	8.04677
Chr1:60693001-60694350	1	60693001	60694350	NA	null					Not found	0	5.43327	3.29163	4.20393	4.68648	3.32193	8.34607	6.78803	8.11376	7.92692	6.10592	5.27197	6.49405	8.09933	4.12361	3.8004	6.34786	8.07526	4.01947	5.12318	4.48878
Chr1:60720901-60721950	1	60720901	60721950	NA	null					Not found	0	5.21088	4.29163	4.37385	3.76894	6.30378	5.21679	5.82985	6.14106	6.56784	5.22457	5.07932	6.41159	5.78482	4.83411	6.04833	2.2049	7.03537	5.9891	2.73086	5.96271
Chr1:60746401-60748050	1	60746401	60748050	NA	null					Not found	0	7.25041	9.09898	5.66336	4.59902	3.80735	8.06764	8.42166	8.28674	10.6935	8.61326	7.49114	7.1986	9.0269	8.75694	5.67487	6.11179	8.08181	7.68244	7.41736	9.27305
Chr1:61038601-61040100	1	61038601	61040100	NA	null					Not found	0	5.28888	5.21763	4.84778	2.18398	3.16992	6.99439	5.45545	8.05754	5.85163	4.97664	3.97241	8.29375	6.38206	4.83411	6.19272	4.61994	7.15189	5.92636	5.53822	7.04677
Chr1:61340101-61341150	1	61340101	61341150	NA	NFIA-002	ENSP00000360233	nuclear factor I/A [Source:HGNC Symbol;Acc:7784]	+	CDS	overlapping	0	6.21088	7.03579	6.74309	5.76894	3.58496	6.10987	6.55854	7.51958	8.11037	6.29857	7.98621	5.64605	6.85697	5.66418	8.85206	5.78986	4.2008	6.62433	8.44511	7.29613
Chr1:61508101-61509150	1	61508101	61509150	NA	NFIA-002	ENSP00000360233	nuclear factor I/A [Source:HGNC Symbol;Acc:7784]	+	CDS	overlapping	0	7.82232	5.61356	6.81864	6.68648	4.9542	7.20385	7.1763	8.62649	6.25373	6.46849	5.88668	6.62181	8.92148	4.75164	7.66665	6.1435	5.96633	4.68244	8.15713	6.36324
Chr1:61515151-61516500	1	61515151	61516500	NA	NFIA-002	ENSP00000360233	nuclear factor I/A [Source:HGNC Symbol;Acc:7784]	+	CDS	overlapping	0	9.02964	10.0223	7.03682	8.18398	7.10852	7.87704	9.15589	9.33877	10.0471	9.28498	9.37788	7.64605	9.81457	9.73564	8.26528	7.84875	8.23054	8.58426	9.30829	9.96271
Chr1:61709401-61710450	1	61709401	61710450	NA	NFIA-002	ENSP00000360233	nuclear factor I/A [Source:HGNC Symbol;Acc:7784]	+	CDS	overlapping	0	5.21088	4.13963	2.52586	4.18398	3.16992	4.57936	4.87049	4.27857	9.2586	5.14656	2.5939	3.54652	4.82135	6.59492	1.8004	0.619936	4.75334	2.43451	4.4313	5.90381
Chr1:61802851-61804650	1	61802851	61804650	NA	NFIA-002	ENSP00000360233	nuclear factor I/A [Source:HGNC Symbol;Acc:7784]	+	CDS	overlapping	0	8.71338	9.75106	7.35367	9.43822	7.85798	8.52317	8.80909	8.70178	9.01006	8.64906	7.01344	7.46708	9.27421	9.47475	8.96698	5.37482	9.01842	8.35337	8.92562	9.41688
Chr1:62157751-62158950	1	62157751	62158950	NA	TM2D1-001	ENSP00000360222	TM2 domain containing 1 [Source:HGNC Symbol;Acc:24142]	-	CDS	overlapping	0	3.36288	4.42913	5.75852	3.59902	5.2854	5.93299	4.87049	3.98906	4.2142	4.5616	1.85693	6.26273	4.49942	4.12361	3.53736	3.78986	7.31627	3.75644	3.90079	4.64078
Chr1:62190151-62191950	1	62190151	62191950	NA	TM2D1-001	ENSP00000360222	TM2 domain containing 1 [Source:HGNC Symbol;Acc:24142]	-	CDS	overlapping	0	9.78242	9.79307	9.32027	9.34048	9.26444	9.25492	9.61644	9.52649	10.0301	9.63127	9.65135	9.31659	9.89602	9.67261	9.48923	9.27457	9.15189	9.61193	9.57321	9.93724
Chr1:62219401-62221050	1	62219401	62221050	NA	null					Not found	0	5.28888	5.36202	4.45186	3.76894	3.16992	4.40943	4.02249	2.4041	4.50371	4.14656	3.7314	3.06109	4.30677	4.47154	4.21544	2.94186	2.61583	4.68244	3.05279	5.1262
Chr1:62304901-62306100	1	62304901	62306100	NA	INADL-001	ENSP00000360200	InaD-like (Drosophila) [Source:HGNC Symbol;Acc:28881]	+	CDS	overlapping	0	3.36288	2.55466	3.01128	3.59902	3.80735	5.10987	4.15999	1.81914	4.36621	2.97664	0.271968	5.1986	3.08438	2.66418	5.70729	0.619936	5.68622	0.434509	3.31582	2.90381
Chr1:62541601-62542650	1	62541601	62542650	NA	INADL-001	ENSP00000360200	InaD-like (Drosophila) [Source:HGNC Symbol;Acc:28881]	+	CDS	overlapping	0	4.7414	4.13963	5.01128	5.99133	6.08746	2.99439	4.15999	3.14106	5.04428	4.14656	3.85693	2.32413	3.66934	3.83411	7.82277	2.61994	2.61583	6.24186	4.90079	6.40631
Chr1:62548201-62548800	1	62548201	62548800	NA	INADL-001	ENSP00000360200	InaD-like (Drosophila) [Source:HGNC Symbol;Acc:28881]	+	CDS	overlapping	0	3.62592	1.9697	4.20393	4.29946	4.16993	0.40943	3.28553	0.819136	1.04428	3.97664	3.07932	2.32413	2.49942	3.24914	4.21544	1.61994	1.87887	4.43451	2.31582	4.48878
Chr1:62586901-62588700	1	62586901	62588700	NA	INADL-001	ENSP00000360200	InaD-like (Drosophila) [Source:HGNC Symbol;Acc:28881]	+	CDS	overlapping	0	4.36288	4.9697	8.52586	8.76392	9.45533	6.26741	5.60745	5.62649	4.95117	4.43607	6.77976	6.64605	3.95885	4.24914	9.31083	8.08754	5.68622	6.45688	5.37472	6.71117
Chr1:62695951-62697150	1	62695951	62697150	NA	null					Not found	0	4.04096	3.77706	6.11082	5.59902	7.10852	2.99439	4.28553	3.81914	5.2922	2.5616	3.07932	8.22298	3.66934	3.24914	7.1343	7.46543	7.50336	4.43451	4.05279	5.90381
Chr1:62786701-62787900	1	62786701	62787900	NA	null					Not found	0	4.21088	4.87659	5.69578	3.59902	4.58496	3.21679	4.87049	4.4041	4.95117	2.5616	3.07932	5.26273	3.66934	2.24914	5.70729	5.7074	4.2008	4.95807	4.4313	5.71117
Chr1:62798851-62799900	1	62798851	62799900	NA	null					Not found	0	4.84831	4.13963	4.11082	2.18398	3.90689	2.73136	4.28553	5.21145	4.04428	3.5616	3.07932	4.73916	2.82135	2.24914	4.739	3.2049	4.38137	4.82683	4.53822	5.01929
Chr1:62821801-62822850	1	62821801	62822850	NA	null					Not found	0	4.21088	5.29163	4.95882	2.18398	5.04439	2.40943	4.401	4.27857	4.95117	2.97664	3.85693	6.26273	2.82135	2.98611	4.97032	2.61994	6.86376	3.75644	4.31582	4.77828
Chr1:62959201-62959950	1	62959201	62959950	NA	DOCK7-203	ENSP00000378828	dedicator of cytokinesis 7 [Source:HGNC Symbol;Acc:19190]	-	CDS	overlapping	0	3.36288	2.55466	3.66336	0.599017	3.16992	3.21679	0.700563	1.81914	4.2142	3.29857	0.271968	3.90909	2.82135	2.66418	3.02279	1.61994	5.2939	2.01947	3.90079	3.31885
Chr1:63087601-63088200	1	63087601	63088200	NA	DOCK7-004	ENSP00000340742	dedicator of cytokinesis 7 [Source:HGNC Symbol;Acc:19190]	-	CDS	overlapping	0	3.36288	2.9697	5.20393	4.50591	5.35755	4.99439	3.50792	4.51958	4.04428	4.78399	3.07932	5.06109	5.02298	3.66418	4.97032	4.07937	6.27118	2.43451	6.6616	4.48878
Chr1:63201151-63202050	1	63201151	63202050	NA	null					Not found	0	4.94785	3.55466	5.72749	6.66511	6.9542	6.21679	3.70056	5.14106	4.50371	3.97664	4.35943	4.73916	5.19986	4.12361	7.57299	5.78986	5.54183	4.3414	5.37472	5.96271
Chr1:63249001-63250650	1	63249001	63250650	NA	null					Not found	0	9.59938	9.93548	8.79638	8.89364	8.86109	8.78447	9.46544	8.79068	10.3549	9.79362	9.55737	8.97757	9.65424	9.62418	9.1841	8.88672	9.03874	9.19273	9.74767	9.60425
Chr1:63781951-63783900	1	63781951	63783900	NA	FOXD3-001	ENSP00000360157	forkhead box D3 [Source:HGNC Symbol;Acc:3804]	+	CDS	downstream	4830	7.416	4.77706	7.27002	8.11472	8.43879	4.86886	8.28553	7.79642	9.87082	7.28042	9.25781	3.90909	8.54927	6.15603	8.79287	8.87732	4.10126	3.24186	5.05279	4.1262
Chr1:63792901-63793950	1	63792901	63793950	NA	FOXD3-001	ENSP00000360157	forkhead box D3 [Source:HGNC Symbol;Acc:3804]	+	CDS	upstream	2735	5.84831	5.82768	3.90437	2.59902	4.39232	4.57936	4.87049	3.14106	5.43659	4.88353	5.07932	3.32413	4.49942	3.98611	4.12233	4.86786	0.293905	3.01947	3.90079	2.31885
Chr1:63832501-63834000	1	63832501	63834000	NA	ALG6-001	ENSP00000360149	asparagine-linked glycosylation 6, alpha-1,3-glucosyltransferase homolog (S. cerevisiae) [Source:HGNC Symbol;Acc:23157]	+	CDS	downstream	2649	9.43327	9.54713	8.97871	8.26435	8.59991	8.69483	9.3659	8.60704	10.033	9.69431	9.79945	7.29375	9.4966	9.42241	8.84115	9.23832	8.15189	8.85657	8.94032	8.71117
Chr1:63988051-63989850	1	63988051	63989850	NA	ITGB3BP-017	ENSP00000271002	integrin beta 3 binding protein (beta3-endonexin) [Source:HGNC Symbol;Acc:6157]	-	CDS	overlapping	0	10.3963	10.3228	9.73141	9.62138	9.35094	10.0186	10.2417	9.28674	10.5931	10.312	9.39091	9.35019	10.31	10.3489	9.53962	9.45599	9.12363	9.68717	9.56375	10.2437
Chr1:64126501-64130100	1	64126501	64130100	NA	PGM1-001	ENSP00000360125	phosphoglucomutase 1 [Source:HGNC Symbol;Acc:8905]	+	CDS	upstream	1155	5.7414	5.72459	9.0588	8.22837	10.3253	8.74035	6.74496	6.31099	7.17356	5.93083	8.45684	8.6758	6.25431	5.0565	9.76426	9.28171	8.556	6.36525	5.25442	7.22574
Chr1:64139701-64141050	1	64139701	64141050	NA	null					Not found	0	5.62592	4.29163	6.81864	5.3539	7.12928	7.37521	4.15999	6.79642	9.86446	4.14656	6.55737	6.84769	6.74735	5.18774	6.09808	4.42729	6.29391	5.07836	4.97879	7.07374
Chr1:64179451-64180500	1	64179451	64180500	NA	null					Not found	0	5.04096	3.9697	7.14644	7.00841	8.11374	8.07477	4.50792	6.02859	4.95117	4.97664	4.7314	6.6699	7.79404	5.24914	7.06093	7.09567	7.64263	5.56379	6.01626	6.07374
Chr1:64196851-64198050	1	64196851	64198050	NA	null					Not found	0	4.04096	1.9697	6.41338	7.6543	8.46761	8.29817	4.70056	6.88522	4.62924	3.29857	2.5939	7.46708	6.08438	3.66418	6.98362	5.86786	7.17655	4.24186	4.4313	5.71117
Chr1:64238851-64240200	1	64238851	64240200	NA	ROR1-201	ENSP00000442826	receptor tyrosine kinase-like orphan receptor 1 [Source:HGNC Symbol;Acc:10256]	+	CDS	overlapping	0	5.7414	5.9697	8.58763	6.97406	8.35755	9.12368	6.401	8.85806	8.30167	5.67708	9.04346	8.52707	9.09561	7.68655	8.52832	8.29942	8.72436	6.04922	8.14872	8.41688
Chr1:64333501-64334550	1	64333501	64334550	NA	ROR1-201	ENSP00000442826	receptor tyrosine kinase-like orphan receptor 1 [Source:HGNC Symbol;Acc:10256]	+	CDS	overlapping	0	3.84831	3.77706	5.11082	2.59902	5.04439	4.99439	3.50792	4.4041	5.36621	4.29857	3.44189	3.73916	6.30677	3.47154	1.21544	3.2049	0.293905	4.89394	3.53822	5.77828
Chr1:64343101-64344300	1	64343101	64344300	NA	ROR1-201	ENSP00000442826	receptor tyrosine kinase-like orphan receptor 1 [Source:HGNC Symbol;Acc:10256]	+	CDS	overlapping	0	3.36288	4.29163	6.15812	4.40637	6.62936	6.71321	4.15999	3.98906	5.90226	3.29857	3.27197	7.36852	5.54381	5.12361	4.12233	4.07937	6.72017	4.75644	3.53822	6.01929
Chr1:64434901-64436100	1	64434901	64436100	NA	ROR1-201	ENSP00000442826	receptor tyrosine kinase-like orphan receptor 1 [Source:HGNC Symbol;Acc:10256]	+	CDS	overlapping	0	5.43327	5.55466	7.47071	6.48166	7.82655	7.42066	7.12683	5.14106	5.74472	4.97664	6.99989	5.06109	7.86574	6.24914	5.3029	4.86786	6.40243	4.24186	5.31582	6.96271
Chr1:64471951-64473150	1	64471951	64473150	NA	ROR1-201	ENSP00000442826	receptor tyrosine kinase-like orphan receptor 1 [Source:HGNC Symbol;Acc:10256]	+	CDS	overlapping	0	3.84831	3.9697	7.81864	6.43191	8.44294	8.44285	4.02249	5.3427	7.87717	4.14656	4.27197	8.71071	6.95885	4.66418	6.9968	5.57413	7.71176	4.60443	4.31582	6.31885
Chr1:64598401-64599450	1	64598401	64599450	NA	ROR1-201	ENSP00000442826	receptor tyrosine kinase-like orphan receptor 1 [Source:HGNC Symbol;Acc:10256]	+	CDS	overlapping	0	3.36288	4.13963	6.20393	3.18398	6.52356	6.38671	4.60745	4.62649	5.50371	2.5616	5.91582	9.43265	6.22734	2.98611	5.67487	5.82939	8.94854	3.89394	4.90079	6.74511
Chr1:64637251-64638600	1	64637251	64638600	NA	ROR1-201	ENSP00000442826	receptor tyrosine kinase-like orphan receptor 1 [Source:HGNC Symbol;Acc:10256]	+	CDS	overlapping	0	3.36288	2.9697	5.72749	4.84694	6.75489	6.76698	4.02249	6.8415	5.04428	3.78399	2.5939	8.28606	4.74735	4.36462	4.46336	3.42729	7.10126	4.75644	3.53822	5.40631
Chr1:64688551-64689750	1	64688551	64689750	NA	UBE2U-002	ENSP00000360117	ubiquitin-conjugating enzyme E2U (putative) [Source:HGNC Symbol;Acc:28559]	+	CDS	overlapping	0	4.36288	3.29163	6.20393	4.50591	7.40088	4.57936	4.87049	4.14106	4.50371	3.5616	4.17886	8.55295	4.08438	4.66418	3.38536	5.1435	7.88636	4.60443	4.73086	5.90381
Chr1:64696501-64697550	1	64696501	64697550	NA	UBE2U-002	ENSP00000360117	ubiquitin-conjugating enzyme E2U (putative) [Source:HGNC Symbol;Acc:28559]	+	CDS	overlapping	0	4.04096	2.55466	4.11082	4.84694	2.32193	5.49689	4.401	0.819136	5.13174	4.14656	2.5939	4.4396	4.30677	4.12361	3.21544	0.619936	4.38137	3.24186	5.12318	6.31885
Chr1:64728751-64729800	1	64728751	64729800	NA	UBE2U-002	ENSP00000360117	ubiquitin-conjugating enzyme E2U (putative) [Source:HGNC Symbol;Acc:28559]	+	CDS	overlapping	0	3.04096	3.29163	4.45186	6.05845	7.24793	4.49689	4.78803	3.62649	7.32968	3.97664	3.07932	2.32413	3.08438	4.24914	9.20979	2.2049	3.10126	4.89394	4.31582	5.48878
Chr1:64808551-64810650	1	64808551	64810650	NA	null					Not found	0	6.46722	5.42913	9.03682	9.5029	9.59991	6.24232	6.55854	6.49156	8.0555	6.10592	8.15461	3.54652	5.74735	5.79346	10.1328	7.73888	3.10126	5.60443	7.76428	7.17683
Chr1:65289601-65290350	1	65289601	65290350	NA	RAVER2-001	ENSP00000360112	ribonucleoprotein, PTB-binding 2 [Source:HGNC Symbol;Acc:25577]	+	CDS	overlapping	0	5.43327	5.77706	4.95882	4.29946	5.16993	2.99439	5.50792	6.02859	7.2142	5.78399	3.85693	3.90909	6.68924	5.79346	5.60775	3.78986	4.2939	5.89394	5.90079	6.1262
Chr1:65363251-65365050	1	65363251	65365050	NA	null					Not found	0	6.17024	4.13963	8.32805	7.76894	8.45121	8.53871	6.19242	7.35829	7.2142	5.83462	4.79553	8.55295	6.05401	5.30804	8.1343	6.59722	7.90861	5.75644	7.1059	6.6764
Chr1:65382751-65383950	1	65382751	65383950	NA	null					Not found	0	5.79584	5.05716	7.93185	5.457	7.98299	8.15762	5.74496	7.19418	5.62924	4.88353	5.02686	8.64003	6.87446	3.98611	5.9968	7.07937	8.88636	7.46793	5.4313	7.17683
Chr1:65399551-65400750	1	65399551	65400750	NA	null					Not found	0	6.36288	3.55466	7.34348	5.7283	6.50779	7.32829	6.19242	8.86898	5.95117	5.67708	3.44189	8.92404	6.70887	5.75164	6.46336	5.94186	8.60224	6.5006	6.92069	7.34122
Chr1:65414551-65415600	1	65414551	65415600	NA	null					Not found	0	5.50039	3.29163	3.90437	4.92094	4.08746	4.65736	5.02249	7.49156	6.13174	4.97664	2.27197	4.90909	4.74735	4.12361	4.12233	0.619936	2.87887	5.01947	2.31582	5.64078
Chr1:65467801-65469150	1	65467801	65469150	NA	null					Not found	0	5.28888	8.22709	3.37385	1.59902	3.70044	7.40943	8.00434	9.87713	4.85163	4.29857	4.17886	8.13148	6.78482	8.148	8.66252	8.02082	8.12045	9.01947	4.05279	9.54285
Chr1:65540701-65541750	1	65540701	65541750	NA	null					Not found	0	4.36288	4.42913	3.78889	2.18398	3.80735	2.99439	4.15999	3.14106	6.2922	3.97664	1.27197	3.06109	3.66934	3.66418	3.02279	0.619936	3.61583	3.24186	4.53822	5.90381
Chr1:65606851-65607900	1	65606851	65607900	NA	null					Not found	0	4.04096	5.13963	4.01128	3.18398	4.75489	5.21679	3.87049	2.4041	4.50371	2.5616	1.85693	6.02457	5.89174	5.30804	1.8004	2.61994	4.38137	4.82683	3.53822	6.1262
Chr1:65719351-65720850	1	65719351	65720850	NA	null					Not found	0	7.82232	8.7706	7.46132	8.2925	8.88264	8.35194	8.13519	8.5606	10.0555	8.98787	9.14541	8.34649	8.45942	9.0565	8.77768	9.28882	8.55129	6.43451	7.62568	7.64078
Chr1:65726251-65727300	1	65726251	65727300	NA	DNAJC6-001	ENSP00000378735	DnaJ (Hsp40) homolog, subfamily C, member 6 [Source:HGNC Symbol;Acc:15469]	+	CDS	downstream	3294	6.43327	5.21763	7.63019	7.9119	8.23362	5.65736	6.94849	5.98906	6.47054	7.78399	6.5199	7.49405	6.19986	6.30804	7.59914	7.73888	8.11408	4.43451	7.2066	5.48878
Chr1:65827951-65829000	1	65827951	65829000	NA	DNAJC6-001	ENSP00000378735	DnaJ (Hsp40) homolog, subfamily C, member 6 [Source:HGNC Symbol;Acc:15469]	+	CDS	overlapping	0	4.7414	3.29163	2.52586	3.40637	1.58496	4.99439	4.78803	3.4041	4.74472	0.976638	0.271968	3.06109	2.49942	3.66418	3.21544	2.61994	0.293905	3.01947	0.730862	4.90381
Chr1:65889151-65890650	1	65889151	65890650	NA	LEPROT-001	ENSP00000360104	leptin receptor overlapping transcript [Source:HGNC Symbol;Acc:29477]	+	CDS	overlapping	0	5.43327	5.05716	6.77378	8.33373	8.66178	6.57936	5.02249	5.62649	5.99847	4.5616	4.5939	8.91409	3.82135	4.83411	6.62483	4.52683	8.30513	5.4789	3.90079	6.74511
Chr1:65895151-65896200	1	65895151	65896200	NA	LEPROT-001	ENSP00000360104	leptin receptor overlapping transcript [Source:HGNC Symbol;Acc:29477]	+	CDS	overlapping	0	4.36288	4.13963	6.41338	8.3539	7.86419	6.53871	5.22412	0.819136	5.43659	4.29857	2.5939	8.25486	4.08438	4.75164	7.43461	4.32038	8.70753	4.52197	4.97879	3.90381
Chr1:65988001-65988900	1	65988001	65988900	NA	null					Not found	0	4.62592	1.9697	2.78889	1.59902	2.80735	3.73136	3.87049	0.819136	3.85163	3.5616	0.271968	4.06109	2.82135	2.66418	2.53736	0.619936	1.87887	2.43451	1.73086	4.48878
Chr1:66123751-66124200	1	66123751	66124200	NA	null					Not found	0	3.04096	0.969701	0.203928	2.18398	0	2.73136	3.28553	0.819136	3.04428	0.976638	0.271968	2.32413	0.49942	3.24914	1.21544	2.61994	1.87887	2.01947	3.31582	2.90381
Chr1:66153151-66153900	1	66153151	66153900	NA	null					Not found	0	4.50039	3.9697	3.78889	2.18398	4.32193	4.73136	3.70056	3.4041	6.2922	1.97664	4.07932	5.38302	4.82135	5.91211	3.67487	3.42729	4.68622	4.43451	5.4313	5.22574
Chr1:66277051-66278550	1	66277051	66278550	NA	null					Not found	0	4.62592	2.55466	5.78889	4.84694	5.16993	6.31632	4.02249	6.92766	8.39301	4.88353	5.12995	9.19449	6.22734	4.83411	3.91588	6.66433	9.51549	5.01947	3.73086	7.15174
Chr1:66295651-66296700	1	66295651	66296700	NA	null					Not found	0	4.7414	2.55466	3.20393	3.40637	3.16992	4.10987	4.15999	2.4041	4.50371	3.29857	0.271968	6.29375	0.49942	3.83411	0.215436	0.619936	6.81747	4.13495	3.05279	5.22574
Chr1:66499201-66500100	1	66499201	66500100	NA	PDE4B-001	ENSP00000332116	phosphodiesterase 4B, cAMP-specific [Source:HGNC Symbol;Acc:8781]	+	CDS	overlapping	0	4.36288	1.9697	3.66336	5.40637	6.24793	1.99439	3.70056	4.27857	3.3662	5.14656	0.271968	2.32413	5.82135	4.98611	6.21544	2.94186	0.293905	4.01947	4.73086	5.1262
Chr1:66634201-66635550	1	66634201	66635550	NA	PDE4B-001	ENSP00000332116	phosphodiesterase 4B, cAMP-specific [Source:HGNC Symbol;Acc:8781]	+	CDS	overlapping	0	7.83537	7.23649	6.45186	7.457	7.92481	5.69483	6.48192	7.44849	6.7167	7.60599	3.27197	4.4396	9.07307	7.97706	7.61632	3.42729	3.99434	6.4789	8.77526	8.17683
Chr1:66696301-66697950	1	66696301	66697950	NA	PDE4B-001	ENSP00000332116	phosphodiesterase 4B, cAMP-specific [Source:HGNC Symbol;Acc:8781]	+	CDS	overlapping	0	7.01824	6.29163	6.64687	9.20635	9.23122	8.28595	7.34442	8.49156	5.2142	7.88353	8.04015	5.13148	8.16475	6.24914	8.20412	6.23465	5.2939	5.68244	9.03007	6.74511
Chr1:66707851-66709050	1	66707851	66709050	NA	PDE4B-001	ENSP00000332116	phosphodiesterase 4B, cAMP-specific [Source:HGNC Symbol;Acc:8781]	+	CDS	overlapping	0	7.46722	8.18887	6.35367	8.09087	8.19967	5.26741	7.99518	5.3427	7.2341	7.5158	4.27197	6.32413	8.4652	7.49707	6.72323	4.7074	5.61583	6.16243	7.86015	8.22574
Chr1:66901651-66903150	1	66901651	66903150	NA	null					Not found	0	5.94785	6.39597	6.72749	6.70754	7.59991	4.57936	6.48192	4.72603	5.13174	5.67708	7.54809	6.38302	6.02298	5.57107	7.32396	6.6423	5.2939	5.38871	3.53822	6.93356
Chr1:66911401-66912900	1	66911401	66912900	NA	null					Not found	0	7.97169	8.90044	6.63019	7.9999	6.76818	5.65736	8.19242	6.3427	7.99847	8.27126	4.97241	6.80525	9.23751	8.4586	6.04833	5.57413	6.86376	7.53254	8.2931	9.17683
Chr1:66986701-66988200	1	66986701	66988200	NA	null					Not found	0	4.62592	5.61356	3.37385	5.18398	4.45943	4.31632	4.94849	6.77333	3.3662	3.78399	2.5939	6.78356	4.58688	4.98611	3.67487	1.61994	7.35999	3.60443	4.73086	6.48878
Chr1:67007851-67009950	1	67007851	67009950	NA	SGIP1-002	ENSP00000237247	SH3-domain GRB2-like (endophilin) interacting protein 1 [Source:HGNC Symbol;Acc:25412]	+	CDS	overlapping	0	7.26977	8.31843	6.56148	8.21373	6.9542	4.49689	7.76665	7.58732	8.17356	6.73153	6.29434	9.39021	8.91305	5.87364	6.60775	3.78986	9.22168	9.31409	7.71955	9.8306
Chr1:67028701-67030650	1	67028701	67030650	NA	SGIP1-002	ENSP00000237247	SH3-domain GRB2-like (endophilin) interacting protein 1 [Source:HGNC Symbol;Acc:25412]	+	CDS	overlapping	0	5.50039	5.05716	4.95882	8.7023	7.19967	5.05329	6.48192	7.17669	5.99847	5.14656	8.52936	10.231	6.83927	6.21877	6.40526	7.80976	10.2335	7.17598	5.25442	8.33008
Chr1:67037101-67038300	1	67037101	67038300	NA	SGIP1-002	ENSP00000237247	SH3-domain GRB2-like (endophilin) interacting protein 1 [Source:HGNC Symbol;Acc:25412]	+	CDS	overlapping	0	3.04096	4.13963	2.78889	3.18398	3	2.73136	4.78803	4.14106	4.50371	3.5616	3.44189	7.96798	4.66934	2.66418	3.38536	2.2049	7.90124	4.60443	3.73086	6.07374
Chr1:67089751-67090800	1	67089751	67090800	NA	SGIP1-002	ENSP00000237247	SH3-domain GRB2-like (endophilin) interacting protein 1 [Source:HGNC Symbol;Acc:25412]	+	CDS	overlapping	0	3.04096	4.42913	3.52586	0.599017	4.32193	1.40943	4.28553	4.62649	4.74472	5.0641	4.5939	7.57205	4.30677	3.24914	3.91588	2.94186	8.27118	5.79206	2.31582	5.90381
Chr1:67191301-67192200	1	67191301	67192200	NA	SGIP1-002	ENSP00000237247	SH3-domain GRB2-like (endophilin) interacting protein 1 [Source:HGNC Symbol;Acc:25412]	+	CDS	overlapping	0	5.28888	6.05716	4.29139	4.29946	3.70044	2.40943	4.87049	4.4041	5.95117	4.88353	7.01344	5.38302	6.56551	4.91211	2.21544	2.94186	5.75334	6.13495	4.4313	6.40631
Chr1:67198951-67199850	1	67198951	67199850	NA	SGIP1-002	ENSP00000237247	SH3-domain GRB2-like (endophilin) interacting protein 1 [Source:HGNC Symbol;Acc:25412]	+	CDS	overlapping	0	4.04096	0.969701	3.01128	3.18398	3.70044	2.40943	3.70056	2.4041	4.04428	3.5616	1.27197	5.38302	3.95885	3.24914	3.53736	0.619936	5.99434	2.75644	2.31582	2.90381
Chr1:67230601-67231200	1	67230601	67231200	NA	TCTEX1D1-001	ENSP00000282670	Tctex1 domain containing 1 [Source:HGNC Symbol;Acc:26882]	+	CDS	overlapping	0	3.36288	2.9697	2.52586	3.40637	0	2.40943	3.28553	0.819136	3.62924	3.5616	1.85693	1.73916	2.82135	2.98611	2.21544	0.619936	3.75334	2.43451	3.05279	3.31885
Chr1:67300201-67301250	1	67300201	67301250	NA	WDR78-001	ENSP00000360065	WD repeat domain 78 [Source:HGNC Symbol;Acc:26252]	-	CDS	overlapping	0	3.84831	2.55466	2.78889	0.599017	2.32193	2.73136	4.15999	0.819136	3.85163	2.5616	0.271968	3.32413	2.49942	1.66418	1.8004	0.619936	2.29391	3.43451	3.05279	4.77828
Chr1:67389901-67392150	1	67389901	67392150	NA	WDR78-001	ENSP00000360065	WD repeat domain 78 [Source:HGNC Symbol;Acc:26252]	-	CDS	overlapping	0	10.4029	10.5281	9.9538	9.85168	9.40514	10.0241	10.2494	9.74395	10.7551	10.1982	10.1938	9.53033	10.2676	10.1318	9.83566	9.93282	9.86186	10.0766	9.91574	10.3605
Chr1:67395151-67397550	1	67395151	67397550	NA	MIER1-009	ENSP00000383820	mesoderm induction early response 1 homolog (Xenopus laevis) [Source:HGNC Symbol;Acc:29657]	+	CDS	overlapping	0	9.9864	10.3404	9.86749	10.2211	9.45943	9.7996	9.56165	9.47377	10.415	9.68744	9.77181	9.87615	10.3605	9.86875	9.68304	9.57704	9.87322	10.0119	9.30451	10.562
Chr1:67410001-67411050	1	67410001	67411050	NA	MIER1-009	ENSP00000383820	mesoderm induction early response 1 homolog (Xenopus laevis) [Source:HGNC Symbol;Acc:29657]	+	CDS	overlapping	0	4.62592	4.42913	6.47071	6.09087	6.90689	6.49689	3.50792	3.98906	4.95117	4.88353	3.7314	7.91907	4.08438	3.24914	4.60775	4.07937	8.52272	4.43451	4.81832	4.90381
Chr1:67479001-67479900	1	67479001	67479900	NA	SLC35D1-001	ENSP00000235345	solute carrier family 35 (UDP-glucuronic acid/UDP-N-acetylgalactosamine dual transporter), member D1 [Source:HGNC Symbol;Acc:20800]	-	CDS	overlapping	0	4.62592	4.77706	5.52586	5.24287	4.32193	5.99439	4.78803	3.14106	4.04428	4.14656	2.85693	4.4396	4.49942	4.47154	3.91588	4.2049	4.61583	5.24186	5.58884	5.71117
Chr1:67518451-67520700	1	67518451	67520700	NA	SLC35D1-001	ENSP00000235345	solute carrier family 35 (UDP-glucuronic acid/UDP-N-acetylgalactosamine dual transporter), member D1 [Source:HGNC Symbol;Acc:20800]	-	CDS	overlapping	0	10.1754	10.5807	9.56806	9.8206	9.35094	9.59925	10.3498	9.92766	8.97501	10.1238	10.0841	9.66398	10.1505	10.3437	9.53511	10.2273	9.76558	9.96978	10.0884	10.3018
Chr1:67526101-67527300	1	67526101	67527300	NA	null					Not found	0	4.94785	3.55466	7.51681	7.15361	7.18982	5.57936	6.05812	5.98906	4.04428	4.43607	3.07932	8.8372	3.95885	4.47154	7.02279	6.26379	8.18265	5.52197	4.19029	6.1262
Chr1:67614301-67615500	1	67614301	67615500	NA	null					Not found	0	5.12842	5.05716	6.2263	4.59902	5.08746	5.26741	5.91002	4.51958	4.74472	4.29857	4.91582	6.06109	3.66934	4.57107	4.21544	5.01225	4.93776	6.79206	6.22271	7.24959
Chr1:67628251-67629450	1	67628251	67629450	NA	IL23R-001	ENSP00000321345	interleukin 23 receptor [Source:HGNC Symbol;Acc:19100]	+	CDS	downstream	4354	5.12842	3.55466	6.57897	7.74876	5.97728	5.57936	4.50792	4.27857	4.04428	0.976638	0.271968	3.32413	2.49942	3.98611	3.02279	6.80976	1.87887	4.01947	3.73086	4.77828
Chr1:67865101-67866600	1	67865101	67866600	NA	IL12RB2-001	ENSP00000262345	interleukin 12 receptor, beta 2 [Source:HGNC Symbol;Acc:5972]	+	CDS	upstream	3329	5.04096	3.29163	7.73531	5.29946	5.97728	4.40943	5.28553	6.3427	5.2922	4.43607	3.7314	3.54652	4.74735	5.24914	7.77768	4.2049	3.29391	4.68244	7.07071	5.01929
Chr1:67965751-67966950	1	67965751	67966950	NA	null					Not found	0	6.08535	5.13963	5.75852	4.76894	4.85798	4.93299	5.22412	4.72603	5.79916	4.67708	5.27197	4.1986	5.49942	4.91211	4.8004	3.78986	3.10126	6.13495	4.53822	6.22574
Chr1:68000551-68001900	1	68000551	68001900	NA	null					Not found	0	5.62592	4.13963	6.43275	5.50591	6.44294	6.21679	5.45545	6.31099	7.47054	3.78399	4.7314	6.98709	5.45362	4.91211	6.21544	4.86786	7.54183	6.41179	5.68506	6.44813
Chr1:68017651-68018700	1	68017651	68018700	NA	null					Not found	0	5.04096	3.9697	5.15812	3.18398	3.90689	4.93299	5.45545	3.98906	5.2142	3.78399	2.27197	0.739163	4.30677	4.66418	5.9968	2.2049	2.61583	5.29249	5.05279	5.90381
Chr1:68173801-68175150	1	68173801	68175150	NA	GNG12-001	ENSP00000360021	guanine nucleotide binding protein (G protein), gamma 12 [Source:HGNC Symbol;Acc:19663]	-	CDS	downstream	432	6.32636	5.61356	8.94539	8.01687	8.14975	5.99439	6.6313	3.98906	6.04428	6.33419	7.47164	6.02457	5.99127	5.0565	7.95015	6.11179	6.29391	7.55345	5.31582	8.48878
Chr1:68178601-68180250	1	68178601	68180250	NA	null					Not found	0	9.23078	9.0304	9.38384	9.17266	8.74819	8.09593	8.58931	8.49862	7.2731	8.22457	8.84182	7.60953	8.3196	7.37843	8.25436	8.55067	8.31627	8.75192	8.3962	9.27885
Chr1:68201251-68202900	1	68201251	68202900	NA	null					Not found	0	9.99515	9.83389	9.94371	9.93664	9.35094	9.21679	10.306	8.74987	7.43659	10.0799	9.22325	9.7643	9.68181	10.1877	9.84297	9.37816	9.64926	9.79645	10.1167	10.393
Chr1:68214151-68216700	1	68214151	68216700	NA	null					Not found	0	9.33098	9.05185	10.5515	10.5164	10.3208	10.0186	10.0089	8.96888	6.99847	8.64906	9.45436	10.3884	9.22393	9.29354	10.4334	9.61994	9.96279	9.62186	9.2187	10.5809
Chr1:68315401-68317050	1	68315401	68317050	NA	null					Not found	0	8.10705	7.19852	8.18692	7.7283	8.44708	6.34017	8.2628	6.43385	7.67363	8.03192	6.07932	6.1986	7.59745	6.64146	9.35243	5.82939	7.18872	7.91832	8.31582	8.21367
Chr1:68348401-68349450	1	68348401	68349450	NA	null					Not found	0	4.36288	3.29163	7.59625	8.22837	8.6865	5.90128	4.94849	5.46299	5.36621	3.78399	0.271968	6.06109	4.49942	4.66418	9.22946	5.2049	6.63376	3.43451	5.25442	6.27305
Chr1:68355301-68356500	1	68355301	68356500	NA	null					Not found	0	6.08535	4.42913	7.95882	9.13429	9.00843	6.05329	6.72293	7.43385	5.2922	6.43607	4.85693	7.49405	6.30677	4.75164	9.44666	6.86786	7.83306	7.20269	7.36022	6.40631
Chr1:68435401-68436450	1	68435401	68436450	NA	null					Not found	0	4.94785	3.77706	7.20393	8.55902	8.62205	7.36363	4.401	5.9066	5.2142	4.88353	3.07932	7.2149	3.66934	3.98611	9.10722	4.61994	7.41285	3.75644	4.31582	5.01929
Chr1:68444251-68445600	1	68444251	68445600	NA	null					Not found	0	4.84831	3.77706	8.09875	9.02108	9.224	5.69483	5.70056	3.98906	5.62924	4.88353	0.271968	5.90909	4.74735	4.83411	8.92968	5.07937	3.46383	3.89394	6.05279	4.64078
Chr1:68527201-68528250	1	68527201	68528250	NA	null					Not found	0	4.50039	4.77706	3.78889	5.12258	6.56986	3.57936	5.15999	3.14106	6.56784	4.43607	0.271968	3.06109	2.08438	3.83411	4.739	2.2049	3.75334	4.60443	2.73086	5.48878
Chr1:68577151-68579400	1	68577151	68579400	NA	WLS-003	ENSP00000346829	wntless homolog (Drosophila) [Source:HGNC Symbol;Acc:30238]	-	CDS	overlapping	0	8.73444	7.62791	9.80941	8.2925	8.58496	8.60419	9.18438	7.66463	8.7167	9.26204	8.17886	7.00595	9.23751	9.39889	9.82831	8.24199	7.45378	7.82683	8.57007	9.39031
Chr1:68639101-68640900	1	68639101	68640900	NA	WLS-003	ENSP00000346829	wntless homolog (Drosophila) [Source:HGNC Symbol;Acc:30238]	-	CDS	overlapping	0	8.00674	7.90044	9.4231	9.19147	9.27612	9.67387	8.04929	5.98906	7.43659	6.95392	5.12995	10.4413	7.58688	7.18774	8.86649	8.25656	10.1643	7.85236	7.80768	8.83455
Chr1:68663101-68664750	1	68663101	68664750	NA	WLS-003	ENSP00000346829	wntless homolog (Drosophila) [Source:HGNC Symbol;Acc:30238]	-	CDS	overlapping	0	6.12842	5.42913	6.67966	6.7283	7.12928	8.80604	6.53345	4.9066	5.50371	5.5616	0.271968	8.69917	5.08438	4.83411	6.9569	1.61994	9.06209	5.79206	5.58884	6.5283
Chr1:68697301-68699250	1	68697301	68699250	NA	WLS-003	ENSP00000346829	wntless homolog (Drosophila) [Source:HGNC Symbol;Acc:30238]	-	CDS	overlapping	0	10.0661	10.5936	9.4471	9.57916	9.15735	9.8336	10.1414	9.37756	8.98679	10.134	9.84751	9.71644	9.86355	10.3044	9.99516	9.34445	9.84657	9.94428	9.90079	10.3384
Chr1:68734951-68736000	1	68734951	68736000	NA	null					Not found	0	3.62592	7.17915	5.81864	5.18398	6.79442	6.13735	5.65476	3.62649	4.2142	6.62049	0.271968	7.06109	5.14328	5.41907	8.05464	2.2049	7.07526	7.73829	7.01626	7.20149
Chr1:68779651-68780700	1	68779651	68780700	NA	null					Not found	0	8.78915	9.2551	6.2263	7.81819	7.2384	8.1509	8.28553	6.06706	9.18383	8.98787	3.07932	6.62181	7.73782	8.90736	8.44425	4.42729	7.69478	7.85236	8.97404	8.93356
Chr1:68787751-68789850	1	68787751	68789850	NA	null					Not found	0	5.56452	6.32725	9.38135	9.48471	8.53916	9.30425	6.85031	4.98906	6.74472	6.70456	6.76382	6.98709	6.30677	6.27889	9.29759	7.47792	6.89382	6.29249	7.37472	7.64078
Chr1:68796451-68797500	1	68796451	68797500	NA	null					Not found	0	5.43327	6.85234	7.88341	7.54153	6.9542	8.59431	5.78803	6.37372	8.59117	6.4029	6.53875	7.41159	4.95885	4.57107	8.6375	5.47792	7.91596	4.43451	7.60123	6.22574
Chr1:68808001-68809200	1	68808001	68809200	NA	null					Not found	0	5.94785	6.36202	6.99834	6.3539	4.80735	6.86886	6.401	5.51958	6.97501	5.83462	6.22616	4.54652	5.66934	5.94958	6.90194	5.1435	5.61583	5.79206	7.15713	7.10021
Chr1:68925151-68926200	1	68925151	68926200	NA	null					Not found	0	3.36288	4.29163	5.29139	4.76894	4.75489	5.49689	5.45545	4.81914	3.62924	3.97664	1.85693	3.06109	3.95885	3.24914	3.67487	2.94186	1.87887	4.3414	3.31582	5.22574
Chr1:68961301-68963550	1	68961301	68963550	NA	DEPDC1-002	ENSP00000412292	DEP domain containing 1 [Source:HGNC Symbol;Acc:22949]	-	CDS	overlapping	0	10.1882	10.2916	9.57462	9.52383	9.39874	9.54642	9.84777	9.54365	10.8338	9.58027	9.47164	8.96798	10.3323	9.93331	9.41019	9.4013	8.24227	9.85236	8.43822	10.4221
Chr1:69007951-69009000	1	69007951	69009000	NA	null					Not found	0	4.7414	3.77706	4.01128	3.18398	3.32193	4.31632	5.78803	3.62649	3.04428	4.5616	2.85693	0.739163	4.19986	4.12361	5.42489	3.78986	0.293905	6.89394	4.19029	5.96271
Chr1:69016501-69018150	1	69016501	69018150	NA	null					Not found	0	4.84831	3.29163	4.45186	3.40637	3.58496	4.10987	5.401	4.14106	6.36621	4.29857	0.271968	4.4396	3.08438	3.47154	3.53736	0.619936	3.61583	6.24186	3.53822	5.71117
Chr1:69023701-69024900	1	69023701	69024900	NA	null					Not found	0	3.62592	4.29163	3.37385	4.40637	2.32193	3.40943	4.78803	3.62649	4.62924	1.97664	0.271968	3.54652	0.49942	4.36462	2.53736	2.2049	1.87887	5.38871	4.05279	2.90381
Chr1:69169201-69170250	1	69169201	69170250	NA	null					Not found	0	3.36288	3.9697	4.11082	1.59902	3	2.40943	4.70056	3.14106	6.43659	3.5616	0.271968	3.54652	3.95885	4.24914	0.215436	1.61994	0.293905	5.43451	4.4313	5.64078
Chr1:69439201-69439950	1	69439201	69439950	NA	null					Not found	0	3.04096	2.55466	7.60481	6.40637	6.75489	6.10987	1.70056	5.27857	4.2142	2.5616	0.271968	2.32413	1.49942	3.47154	8.20979	2.94186	1.87887	3.60443	2.31582	6.44813
Chr1:69575251-69576150	1	69575251	69576150	NA	null					Not found	0	3.36288	2.55466	4.29139	2.18398	3.32193	3.73136	4.94849	3.14106	4.95117	3.5616	2.27197	1.73916	3.08438	1.66418	7.739	1.61994	1.87887	5.24186	0.730862	5.40631
Chr1:70448401-70449300	1	70448401	70449300	NA	LRRC7-002	ENSP00000309245	leucine rich repeat containing 7 [Source:HGNC Symbol;Acc:18531]	+	CDS	overlapping	0	4.21088	3.77706	3.52586	0.599017	3.90689	3.21679	4.15999	3.14106	4.36621	0.976638	5.85693	5.98709	2.82135	2.98611	4.02279	0.619936	7.57931	4.24186	3.05279	4.48878
Chr1:70670551-70672200	1	70670551	70672200	NA	LRRC40-001	ENSP00000359990	leucine rich repeat containing 40 [Source:HGNC Symbol;Acc:26004]	-	CDS	overlapping	0	9.85794	10.0465	9.44948	9.36057	9.07682	9.85651	9.76934	9.6168	10.0244	9.95105	9.43939	9.13148	9.75208	9.74633	9.18985	8.88203	9.05878	9.4979	9.49573	9.92618
Chr1:70686451-70688100	1	70686451	70688100	NA	SRSF11-002	ENSP00000359989	serine/arginine-rich splicing factor 11 [Source:HGNC Symbol;Acc:10782]	+	CDS	overlapping	0	9.81574	9.88558	9.49395	9.42238	9.07146	9.66917	9.87299	9.42276	10.2092	9.70115	9.62291	9.21084	9.63897	9.70584	9.56416	9.15909	9.19175	9.15902	9.51876	9.66315
Chr1:70785001-70786200	1	70785001	70786200	NA	ANKRD13C-001	ENSP00000359982	ankyrin repeat domain 13C [Source:HGNC Symbol;Acc:25374]	-	CDS	overlapping	0	4.62592	4.42913	5.81864	3.18398	4.58496	4.10987	4.60745	3.14106	4.36621	1.97664	2.85693	8.65803	3.08438	3.98611	3.21544	3.61994	7.38137	4.68244	4.81832	4.77828
Chr1:70792651-70794900	1	70792651	70794900	NA	ANKRD13C-001	ENSP00000359982	ankyrin repeat domain 13C [Source:HGNC Symbol;Acc:25374]	-	CDS	overlapping	0	5.36288	4.29163	4.29139	4.84694	4.39232	5.05329	4.70056	3.14106	5.2922	2.5616	3.07932	5.1986	3.95885	3.47154	4.3029	2.2049	5.15189	4.95807	4.4313	5.64078
Chr1:70819051-70821300	1	70819051	70821300	NA	ANKRD13C-001	ENSP00000359982	ankyrin repeat domain 13C [Source:HGNC Symbol;Acc:25374]	-	CDS	overlapping	0	10.1907	10.53	10.27	10.2156	10.0566	10.1793	10.4555	10.0599	10.5361	10.6259	10.1439	10.245	10.3291	10.317	10.1841	10.3082	9.60452	10.2142	10.0928	10.5477
Chr1:70875901-70877700	1	70875901	70877700	NA	CTH-001	ENSP00000359976	cystathionase (cystathionine gamma-lyase) [Source:HGNC Symbol;Acc:2501]	+	CDS	overlapping	0	9.77227	9.53576	9.36883	8.64341	9.17991	9.53871	9.42166	9.674	7.43659	9.55407	9.45188	8.55934	9.77554	9.94263	9.19272	8.61429	8.65585	9.04553	9.51222	9.95547
Chr1:70925251-70926000	1	70925251	70926000	NA	null					Not found	0	5.68481	5.61356	6.81864	2.59902	5.49185	3.99439	5.70056	3.14106	6.13174	6.18609	8.16071	4.4396	5.45362	5.61838	3.02279	4.7074	2.61583	5.29249	6.25442	6.6764
Chr1:71546101-71547750	1	71546101	71547750	NA	ZRANB2-001	ENSP00000359958	zinc finger, RAN-binding domain containing 2 [Source:HGNC Symbol;Acc:13058]	-	CDS	overlapping	0	9.59938	9.70441	9.32805	9.34385	9.24079	9.32829	9.37299	9.50213	9.79916	9.59869	9.4444	9.30141	9.4966	9.559	9.35243	8.95979	9.04879	9.60193	9.48909	9.73248
Chr1:74663251-74664450	1	74663251	74664450	NA	FPGT-007	ENSP00000434934	fucose-1-phosphate guanylyltransferase [Source:HGNC Symbol;Acc:3825]	+	CDS	overlapping	0	8.85474	9.71789	8.35875	7.94774	7.97728	8.94081	9.21626	7.98906	9.47473	8.78399	9.04346	8.41864	8.67933	8.79346	8.60775	8.55657	8.61132	8.95021	8.78071	9.32448
Chr1:75198301-75200100	1	75198301	75200100	NA	TYW3-001	ENSP00000359904	tRNA-yW synthesizing protein 3 homolog (S. cerevisiae) [Source:HGNC Symbol;Acc:24757]	+	CDS	overlapping	0	9.84509	10.3051	9.58763	8.90736	9.15229	9.20385	9.74222	9.50913	9.85163	9.89252	9.47409	8.65803	9.88959	9.86385	9.53736	9.17836	9.18872	9.56637	9.56375	9.82268
Chr1:75731401-75731700	1	75731401	75731700	NA	SLC44A5-001	ENSP00000359896	solute carrier family 44, member 5 [Source:HGNC Symbol;Acc:28524]	-	CDS	overlapping	0	2.62592	0.969701	1.78889	0.599017	0	2.99439	4.15999	2.81914	3.62924	3.5616	0.271968	2.73916	2.49942	2.24914	3.67487	1.61994	0.293905	3.01947	4.19029	2.90381
Chr1:75968251-75969000	1	75968251	75969000	NA	SLC44A5-001	ENSP00000359896	solute carrier family 44, member 5 [Source:HGNC Symbol;Acc:28524]	-	CDS	overlapping	0	3.36288	1.9697	1.78889	2.59902	4	3.99439	3.02249	3.81914	3.3662	2.97664	3.07932	2.32413	3.30677	3.47154	5.60775	1.61994	0.293905	3.01947	3.53822	2.31885
Chr1:76137901-76139250	1	76137901	76139250	NA	null					Not found	0	4.04096	6.01409	5.11082	6.38038	7.33092	5.99439	4.401	4.98906	5.43659	3.78399	7.19083	5.06109	5.3574	5.61838	6.8004	6.52683	3.99434	7.35337	4.81832	5.84241
Chr1:76189351-76191000	1	76189351	76191000	NA	ACADM-001	ENSP00000359878	acyl-CoA dehydrogenase, C-4 to C-12 straight chain [Source:HGNC Symbol;Acc:89]	+	CDS	overlapping	0	9.4461	9.95269	9.61756	9.72314	9.25739	9.90928	9.52711	9.50213	10.5037	9.94818	9.8793	9.41864	9.96702	9.93331	9.78908	9.52983	9.37871	9.80083	9.60431	10.1799
Chr1:76231051-76232250	1	76231051	76232250	NA	ACADM-017	ENSP00000434284	acyl-CoA dehydrogenase, C-4 to C-12 straight chain [Source:HGNC Symbol;Acc:89]	+	CDS	overlapping	0	4.94785	3.77706	5.37385	4.68648	5.83289	6.24232	4.87049	5.57402	3.04428	4.97664	5.22616	8.78356	2.82135	3.24914	5.57299	5.37482	8.7327	4.82683	3.90079	4.1262
Chr1:76320751-76321050	1	76320751	76321050	NA	MSH4-001	ENSP00000263187	mutS homolog 4 (E. coli) [Source:HGNC Symbol;Acc:7327]	+	CDS	overlapping	0	3.04096	2.9697	2.20393	0.599017	1.58496	0.40943	2.70056	0.819136	1.04428	0.976638	1.27197	2.32413	0.49942	1.66418	0.215436	0.619936	1.87887	3.24186	1.73086	1.31885
Chr1:76374451-76374750	1	76374451	76374750	NA	MSH4-001	ENSP00000263187	mutS homolog 4 (E. coli) [Source:HGNC Symbol;Acc:7327]	+	CDS	overlapping	0	3.36288	3.29163	4.01128	3.59902	2.32193	1.99439	1.70056	2.81914	3.62924	2.97664	5.02686	2.32413	3.08438	3.47154	2.21544	0.619936	2.29391	3.89394	0.730862	2.90381
Chr1:76456951-76457850	1	76456951	76457850	NA	null					Not found	0	1.04096	4.42913	4.29139	0.599017	2	1.99439	2.70056	3.14106	2.62924	3.5616	2.5939	3.73916	3.08438	3.24914	3.21544	0.619936	3.29391	3.89394	3.53822	5.1262
Chr1:76489951-76491000	1	76489951	76491000	NA	null					Not found	0	3.36288	4.87659	5.24832	2.18398	3.45943	4.49689	3.50792	2.4041	3.3662	0.976638	1.85693	3.06109	3.49942	1.66418	4.3029	2.61994	1.29391	5.24186	3.53822	4.48878
Chr1:76533901-76534950	1	76533901	76534950	NA	null					Not found	0	5.04096	3.29163	4.29139	0.599017	2.80735	3.21679	4.28553	2.4041	2.04428	4.14656	0.271968	4.82663	3.49942	3.47154	7.44426	0.619936	5.93776	4.43451	0.730862	4.48878
Chr1:76619401-76620750	1	76619401	76620750	NA	ST6GALNAC3-001	ENSP00000329214	ST6 euraminyl-2,3-beta-galactosyl-1,3)-N-acetylgalactosaminide alpha-2,6-sialyltransferase 3 [Source:HGNC Symbol;Acc:19343]	+	CDS	overlapping	0	4.04096	4.77706	7.54378	5.457	6.44294	7.5693	4.401	4.27857	7.17356	5.83462	9.13615	3.06109	4.30677	4.91211	7.80789	5.52683	4.38137	7.66333	6.4313	6.93356
Chr1:76623451-76624650	1	76623451	76624650	NA	ST6GALNAC3-001	ENSP00000329214	ST6 euraminyl-2,3-beta-galactosyl-1,3)-N-acetylgalactosaminide alpha-2,6-sialyltransferase 3 [Source:HGNC Symbol;Acc:19343]	+	CDS	overlapping	0	3.36288	2.55466	4.11082	2.92094	2	6.13735	3.70056	2.4041	4.04428	3.5616	5.5939	0.739163	3.49942	2.66418	3.67487	2.61994	2.29391	4.82683	0.730862	5.40631
Chr1:76657951-76659000	1	76657951	76659000	NA	ST6GALNAC3-001	ENSP00000329214	ST6 euraminyl-2,3-beta-galactosyl-1,3)-N-acetylgalactosaminide alpha-2,6-sialyltransferase 3 [Source:HGNC Symbol;Acc:19343]	+	CDS	overlapping	0	2.62592	4.42913	5.24832	2.92094	3.45943	7.45382	2.70056	3.14106	4.85163	2.5616	0.271968	2.73916	1.49942	2.24914	2.21544	2.2049	3.29391	4.43451	2.31582	5.22574
Chr1:76703251-76704750	1	76703251	76704750	NA	ST6GALNAC3-001	ENSP00000329214	ST6 euraminyl-2,3-beta-galactosyl-1,3)-N-acetylgalactosaminide alpha-2,6-sialyltransferase 3 [Source:HGNC Symbol;Acc:19343]	+	CDS	overlapping	0	4.04096	3.77706	7.2263	6.40637	6.53916	6.13735	3.87049	3.62649	4.36621	3.5616	7.95145	3.06109	0.49942	3.24914	6.16963	5.7074	0.293905	5.43451	3.53822	5.90381
Chr1:76719451-76721100	1	76719451	76721100	NA	ST6GALNAC3-001	ENSP00000329214	ST6 euraminyl-2,3-beta-galactosyl-1,3)-N-acetylgalactosaminide alpha-2,6-sialyltransferase 3 [Source:HGNC Symbol;Acc:19343]	+	CDS	overlapping	0	4.04096	4.42913	8.62178	7.78884	8.67596	9.33721	4.70056	5.06706	5.36621	4.29857	7.5199	4.54652	3.82135	4.36462	8.72323	6.07937	3.61583	7.1894	4.53822	5.96271
Chr1:76796401-76797450	1	76796401	76797450	NA	ST6GALNAC3-001	ENSP00000329214	ST6 euraminyl-2,3-beta-galactosyl-1,3)-N-acetylgalactosaminide alpha-2,6-sialyltransferase 3 [Source:HGNC Symbol;Acc:19343]	+	CDS	overlapping	0	3.36288	3.77706	6.20393	2.92094	3.58496	4.21679	3.87049	4.27857	7.04428	2.97664	4.27197	3.06109	4.08438	3.66418	6.09808	2.94186	3.29391	6.52197	3.05279	6.31885
Chr1:77105401-77106450	1	77105401	77106450	NA	null					Not found	0	3.84831	3.29163	4.01128	2.18398	2	2.99439	4.28553	3.14106	4.2142	2.5616	0.271968	3.06109	2.08438	3.24914	3.02279	0.619936	1.29391	3.75644	0.730862	4.48878
Chr1:77156101-77157150	1	77156101	77157150	NA	null					Not found	0	4.50039	3.55466	3.66336	0.599017	0	3.73136	3.50792	3.14106	4.50371	2.97664	4.44189	2.32413	2.08438	3.98611	4.12233	0.619936	1.87887	5.24186	2.31582	5.01929
Chr1:77366701-77367300	1	77366701	77367300	NA	ST6GALNAC5-003	ENSP00000417583	ST6 euraminyl-2,3-beta-galactosyl-1,3)-N-acetylgalactosaminide alpha-2,6-sialyltransferase 5 [Source:HGNC Symbol;Acc:19342]	+	CDS	overlapping	0	1.04096	3.29163	3.37385	0.599017	2	3.73136	2.70056	2.4041	4.36621	0.976638	0.271968	2.73916	1.49942	2.66418	3.53736	0.619936	1.29391	2.01947	1.73086	2.90381
Chr1:77463901-77465100	1	77463901	77465100	NA	ST6GALNAC5-003	ENSP00000417583	ST6 euraminyl-2,3-beta-galactosyl-1,3)-N-acetylgalactosaminide alpha-2,6-sialyltransferase 5 [Source:HGNC Symbol;Acc:19342]	+	CDS	overlapping	0	2.62592	0.969701	6.75852	5.18398	7.97154	8.08186	4.15999	5.14106	5.2142	3.29857	4.5199	8.06109	3.08438	2.24914	7.00985	4.78986	8.16427	3.89394	3.73086	3.90381
Chr1:77505001-77506350	1	77505001	77506350	NA	ST6GALNAC5-003	ENSP00000417583	ST6 euraminyl-2,3-beta-galactosyl-1,3)-N-acetylgalactosaminide alpha-2,6-sialyltransferase 5 [Source:HGNC Symbol;Acc:19342]	+	CDS	overlapping	0	3.36288	5.49326	8.9009	6.29946	8.17493	7.39812	4.70056	8.41905	5.50371	2.5616	4.07932	5.90909	3.08438	3.66418	8.50546	6.61994	5.78576	5.89394	4.19029	5.31885
Chr1:77533501-77534400	1	77533501	77534400	NA	ST6GALNAC5-003	ENSP00000417583	ST6 euraminyl-2,3-beta-galactosyl-1,3)-N-acetylgalactosaminide alpha-2,6-sialyltransferase 5 [Source:HGNC Symbol;Acc:19342]	+	CDS	upstream	4610	4.36288	2.9697	3.78889	0.599017	1.58496	3.40943	4.02249	3.4041	5.2922	3.78399	1.85693	2.32413	2.82135	3.24914	3.53736	0.619936	2.61583	2.75644	0.730862	3.31885
Chr1:77684401-77685600	1	77684401	77685600	NA	PIGK-001	ENSP00000359848	phosphatidylinositol glycan anchor biosynthesis, class K [Source:HGNC Symbol;Acc:8965]	-	CDS	overlapping	0	8.42466	8.84007	8.65101	8.20635	7.90689	8.58934	7.401	7.87442	9.41932	8.69088	8.83421	8.82663	8.54381	8.29354	8.33438	8.44648	8.57931	8.39451	8.74767	8.57624
Chr1:77787301-77788650	1	77787301	77788650	NA	AK5-001	ENSP00000346577	adenylate kinase 5 [Source:HGNC Symbol;Acc:365]	+	CDS	overlapping	0	3.84831	4.42913	7.62178	7.87514	7.90087	8.13735	4.401	7.41905	6.17356	3.78399	2.5939	8.26273	2.82135	4.12361	6.19272	5.66433	7.65146	5.79206	2.73086	5.1262
Chr1:77877751-77878800	1	77877751	77878800	NA	AK5-001	ENSP00000346577	adenylate kinase 5 [Source:HGNC Symbol;Acc:365]	+	CDS	overlapping	0	4.04096	4.29163	8.89043	8.20635	8.00562	5.8357	4.78803	6.46299	5.50371	4.29857	5.85693	5.13148	4.19986	3.98611	6.70729	7.95979	5.04879	5.68244	3.53822	5.31885
Chr1:78001951-78003600	1	78001951	78003600	NA	AK5-001	ENSP00000346577	adenylate kinase 5 [Source:HGNC Symbol;Acc:365]	+	CDS	overlapping	0	5.62592	4.77706	8.90437	6.21373	8.24793	7.99439	6.19242	8.53338	6.7167	5.78399	8.51514	9.44997	5.6287	4.83411	6.34472	9.12376	9.0948	5.56379	5.4313	5.84241
Chr1:78147601-78150150	1	78147601	78150150	NA	null					Not found	0	10.877	11.1949	10.3751	10.2732	9.75822	10.3446	10.7463	10.317	11.1463	10.8578	10.4887	10.2169	10.8021	10.8626	10.3187	10.3169	10.1125	10.2419	10.6089	10.9824
Chr1:78227251-78228450	1	78227251	78228450	NA	null					Not found	0	3.62592	4.13963	4.37385	3.18398	5.35755	5.36363	4.50792	4.62649	1.04428	2.97664	1.85693	5.1986	3.30677	3.24914	5.50084	4.52683	3.99434	4.60443	3.53822	4.1262
Chr1:78244651-78246000	1	78244651	78246000	NA	FAM73A-001	ENSP00000359827	family with sequence similarity 73, member A [Source:HGNC Symbol;Acc:24741]	+	CDS	overlapping	0	8.50856	9.31843	8.38384	7.9999	7.49985	8.50746	8.38706	8.2454	9.18894	8.52353	8.89035	7.97757	8.75208	8.58305	7.93654	8.55657	8.31627	8.40029	8.32332	9.0804
Chr1:78443551-78446100	1	78443551	78446100	NA	FUBP1-001	ENSP00000294623	far upstream element (FUSE) binding protein 1 [Source:HGNC Symbol;Acc:4004]	-	CDS	overlapping	0	10.9791	11.1156	10.4219	10.6269	10.0334	10.6298	10.6649	10.4986	11.1238	10.9395	10.496	10.3391	10.6818	10.8589	10.4358	10.2124	10.1315	10.4993	10.4957	10.9299
Chr1:78469051-78472050	1	78469051	78472050	NA	DNAJB4-003	ENSP00000399494	DnaJ (Hsp40) homolog, subfamily B, member 4 [Source:HGNC Symbol;Acc:14886]	+	CDS	overlapping	0	9.00674	9.41264	8.56148	9.67583	8.37504	9.79097	7.73399	8.09526	5.2142	8.87751	6.76382	9.1986	8.36978	7.75164	9.3029	5.90534	10.2217	7.99675	8.31582	8.89628
Chr1:78536101-78537150	1	78536101	78537150	NA	GIPC2-001	ENSP00000359795	GIPC PDZ domain containing family, member 2 [Source:HGNC Symbol;Acc:18177]	+	CDS	overlapping	0	1.04096	3.55466	5.29139	4.18398	4.52356	7.6286	4.60745	3.62649	4.04428	2.5616	1.85693	6.57205	0.49942	2.98611	6.62483	2.2049	6.02183	2.75644	4.05279	3.90381
Chr1:78558001-78559200	1	78558001	78559200	NA	GIPC2-001	ENSP00000359795	GIPC PDZ domain containing family, member 2 [Source:HGNC Symbol;Acc:18177]	+	CDS	overlapping	0	3.36288	0.969701	3.90437	3.76894	3.45943	3.99439	4.401	3.14106	3.85163	2.5616	0.271968	6.02457	2.82135	2.98611	3.53736	2.94186	6.1268	3.60443	4.4313	4.31885
Chr1:78566701-78568500	1	78566701	78568500	NA	GIPC2-001	ENSP00000359795	GIPC PDZ domain containing family, member 2 [Source:HGNC Symbol;Acc:18177]	+	CDS	overlapping	0	5.12842	5.29163	7.63856	5.24287	7.05528	5.73136	6.22412	6.9066	4.50371	4.14656	7.02686	10.1033	5.30677	5.24914	6.67487	2.94186	9.65585	5.56379	5.58884	6.64078
Chr1:78576001-78577050	1	78576001	78577050	NA	GIPC2-001	ENSP00000359795	GIPC PDZ domain containing family, member 2 [Source:HGNC Symbol;Acc:18177]	+	CDS	overlapping	0	3.04096	5.05716	5.29139	2.92094	3.16992	5.40943	4.28553	3.62649	4.04428	3.78399	0.271968	5.4396	4.49942	3.66418	3.21544	0.619936	4.2008	5.43451	2.73086	5.40631
Chr1:78579451-78580800	1	78579451	78580800	NA	GIPC2-001	ENSP00000359795	GIPC PDZ domain containing family, member 2 [Source:HGNC Symbol;Acc:18177]	+	CDS	overlapping	0	3.84831	6.17915	5.52586	3.18398	4.70044	5.90128	4.60745	4.9066	6.36621	4.43607	4.27197	6.88891	4.30677	4.47154	4.53736	4.7074	5.84849	5.56379	4.81832	6.48878
Chr1:78805051-78806850	1	78805051	78806850	NA	null					Not found	0	3.04096	4.67014	5.93185	5.84694	8.89785	9.22	4.87049	6.49156	3.3662	3.78399	6.53875	9.87871	3.49942	3.47154	8.739	4.52683	9.67328	3.43451	5.05279	5.77828
Chr1:79083151-79083900	1	79083151	79083900	NA	null					Not found	0	7.39851	7.53956	5.95882	6.12258	5.2854	6.10987	6.58321	4.27857	4.04428	5.43607	7.20271	4.98709	7.57624	5.87364	5.21544	5.37482	6.35999	7.10693	7.22271	6.77828
Chr1:79157701-79158450	1	79157701	79158450	NA	null					Not found	0	4.04096	4.13963	5.41338	5.40637	7.07682	6.96402	4.78803	6.27857	4.74472	3.78399	2.27197	6.29375	3.95885	3.47154	6.83015	4.7074	4.81747	2.75644	4.05279	4.77828
Chr1:79297051-79298100	1	79297051	79298100	NA	null					Not found	0	1.04096	4.55466	6.08657	6.3539	7.76155	6.74928	3.87049	3.62649	3.85163	3.78399	4.97241	8.68168	3.08438	4.75164	6.69117	5.1435	8.25391	4.89394	3.53822	5.01929
Chr1:79545151-79546200	1	79545151	79546200	NA	null					Not found	0	3.84831	2.55466	5.98529	7.05845	6.30378	6.38671	5.91002	3.14106	3.3662	0.976638	3.97241	8.04294	4.82135	5.83411	5.12233	3.42729	8.98739	5.29249	3.05279	6.27305
Chr1:79653751-79654800	1	79653751	79654800	NA	null					Not found	0	3.04096	3.9697	2.52586	4.59902	5.39232	6.69483	3.87049	0.819136	4.36621	2.5616	0.271968	7.65803	1.49942	3.66418	3.21544	0.619936	8.27118	3.60443	3.53822	4.1262
Chr1:79658551-79659900	1	79658551	79659900	NA	null					Not found	0	4.50039	5.36202	6.01128	8.07475	7.67948	7.69483	4.15999	0.819136	4.62924	2.97664	3.44189	8.65205	2.49942	3.47154	7.24886	2.2049	8.7033	6.21587	3.05279	5.40631
Chr1:79788601-79789650	1	79788601	79789650	NA	null					Not found	0	4.7414	4.67014	6.86214	7.92095	8.35315	6.51795	5.22412	7.80782	3.62924	4.29857	6.62952	7.8372	2.49942	3.47154	9.04516	5.01225	7.76964	6.60443	4.4313	5.01929
Chr1:80910451-80911350	1	80910451	80911350	NA	null					Not found	0	3.36288	3.77706	3.01128	2.18398	4.80735	1.99439	4.87049	1.81914	4.62924	2.5616	0.271968	0.739163	2.49942	0.664182	3.8004	2.2049	3.46383	3.89394	0.730862	5.31885
Chr1:81000151-81001500	1	81000151	81001500	NA	null					Not found	0	3.04096	4.13963	3.90437	3.76894	4.70044	6.19079	4.60745	0.819136	5.95117	3.29857	2.5939	3.90909	4.40631	4.12361	3.21544	0.619936	0.293905	4.3414	3.05279	5.48878
Chr1:81348151-81348750	1	81348151	81348750	NA	null					Not found	0	1.04096	0.969701	0.203928	2.59902	1.58496	0.40943	2.28553	0.819136	3.3662	0.976638	0.271968	3.32413	0.49942	2.24914	0.215436	0.619936	4.87887	2.01947	3.53822	3.64078
Chr1:81640051-81641250	1	81640051	81641250	NA	null					Not found	0	3.36288	5.82768	5.98529	2.18398	5.72792	4.10987	5.09288	2.81914	5.74472	4.14656	4.91582	5.1986	3.49942	4.24914	1.8004	4.32038	1.29391	4.13495	3.05279	5.77828
Chr1:81769801-81770400	1	81769801	81770400	NA	null					Not found	0	3.36288	3.9697	3.78889	0.599017	3.16992	3.99439	3.02249	3.4041	2.62924	4.14656	1.27197	3.32413	1.49942	2.98611	2.21544	2.61994	2.61583	2.43451	2.31582	5.01929
Chr1:82168351-82169250	1	82168351	82169250	NA	null					Not found	0	4.36288	4.9697	7.56148	2.18398	7.14975	5.57936	5.28553	4.51958	4.95117	3.29857	1.85693	8.52052	3.30677	4.91211	8.81535	3.78986	8.12679	4.3414	4.05279	6.64078
Chr1:82185751-82186350	1	82185751	82186350	NA	null					Not found	0	3.36288	4.13963	4.20393	3.18398	4.39232	1.40943	3.02249	2.4041	3.04428	3.5616	3.7314	3.06109	2.82135	3.47154	3.21544	0.619936	1.29391	3.43451	1.73086	3.31885
Chr1:83030551-83031900	1	83030551	83031900	NA	null					Not found	0	7.88645	7.07823	8.29139	3.76894	7.15987	7.90128	8.03148	6.43385	7.70249	7.24342	3.7314	7.30902	6.28078	7.3921	7.35499	6.80976	7.72017	6.45688	7.37472	7.69389
Chr1:83097451-83098650	1	83097451	83098650	NA	null					Not found	0	3.84831	2.55466	2.78889	0.599017	2.80735	4.80175	4.15999	2.4041	5.13174	3.29857	3.07932	0.739163	2.82135	2.98611	2.21544	0.619936	3.99434	2.01947	2.31582	5.22574
Chr1:84463801-84465750	1	84463801	84465750	NA	TTLL7-202	ENSP00000359738	tubulin tyrosine ligase-like family, member 7 [Source:HGNC Symbol;Acc:26242]	-	CDS	overlapping	0	10.1469	10.2224	9.68371	9.72314	9.10329	9.63102	9.95559	9.54706	11.2067	10.2079	9.67498	8.63398	10.3003	10.3767	8.99022	9.97088	9.21277	9.4925	9.62871	10.5307
Chr1:84568651-84569850	1	84568651	84569850	NA	PRKACB-001	ENSP00000359723	protein kinase, cAMP-dependent, catalytic, beta [Source:HGNC Symbol;Acc:9381]	+	CDS	overlapping	0	7.56452	6.52429	8.11682	9.34385	8.31288	6.63825	6.28553	7.62649	7.43659	6.18609	5.35943	6.49405	8.70887	6.66418	8.78149	6.4013	8.07526	7.67291	7.76428	8.04677
Chr1:84621001-84623400	1	84621001	84623400	NA	PRKACB-001	ENSP00000359723	protein kinase, cAMP-dependent, catalytic, beta [Source:HGNC Symbol;Acc:9381]	+	CDS	overlapping	0	7.87385	5.61356	9.4085	10.167	9.10852	9.14752	8.55854	9.42647	5.99847	8.14656	6.5199	6.86845	8.66934	6.44554	9.59698	7.51475	7.38137	7.97367	8.63173	6.93356
Chr1:84639001-84640950	1	84639001	84640950	NA	PRKACB-001	ENSP00000359723	protein kinase, cAMP-dependent, catalytic, beta [Source:HGNC Symbol;Acc:9381]	+	CDS	overlapping	0	4.94785	3.29163	7.49855	8.19893	8.10329	6.73136	4.15999	3.62649	4.95117	5.14656	1.85693	7.09672	6.19986	3.98611	9.10113	4.07937	7.02183	6.62433	4.97879	5.40631
Chr1:84712501-84714300	1	84712501	84714300	NA	null					Not found	0	5.28888	4.67014	4.45186	8.69177	7.90689	4.65736	4.87049	5.06706	4.62924	4.43607	6.62952	8.34649	4.74735	3.83411	2.8004	2.2049	9.01842	5.01947	2.31582	6.1262
Chr1:84812251-84815250	1	84812251	84815250	NA	SAMD13-002	ENSP00000359707	sterile alpha motif domain containing 13 [Source:HGNC Symbol;Acc:24582]	+	CDS	overlapping	0	6.65567	6.94698	6.91817	9.13429	7.53138	5.69483	7.35877	5.81914	5.56784	4.88353	5.66429	5.13148	7.28078	5.52216	6.48222	5.47792	6.02183	6.16243	7.69665	7.5283
Chr1:84830701-84832800	1	84830701	84832800	NA	SAMD13-007	ENSP00000391978	sterile alpha motif domain containing 13 [Source:HGNC Symbol;Acc:24582]	+	CDS	overlapping	0	7.64087	5.67014	9.13762	9.60464	9.33092	8.81882	8.18438	9.45938	5.13174	7.04273	8.96894	8.92899	7.73782	6.15603	10.0115	9.63953	9.19779	6.87745	8.94032	7.29613
Chr1:84867301-84868500	1	84867301	84868500	NA	DNASE2B-001	ENSP00000359699	deoxyribonuclease II beta [Source:HGNC Symbol;Acc:28875]	+	CDS	overlapping	0	4.84831	2.55466	4.66336	2.59902	3.70044	4.57936	4.50792	6.46299	4.04428	4.29857	1.27197	3.06109	4.95885	3.98611	3.02279	3.2049	2.29391	3.75644	3.53822	5.1262
Chr1:84871801-84873600	1	84871801	84873600	NA	DNASE2B-001	ENSP00000359699	deoxyribonuclease II beta [Source:HGNC Symbol;Acc:28875]	+	CDS	overlapping	0	5.28888	4.42913	5.06191	4.50591	5.20945	7.31632	5.401	4.72603	4.2142	5.29857	3.97241	2.32413	4.58688	4.66418	3.91588	2.2049	3.29391	5.4789	4.73086	5.71117
Chr1:84888151-84889350	1	84888151	84889350	NA	null					Not found	0	4.50039	3.55466	3.78889	0.599017	3.32193	5.21679	5.22412	3.62649	3.62924	3.5616	0.271968	1.73916	4.89174	3.47154	3.38536	2.2049	2.87887	3.75644	0.730862	5.1262
Chr1:84892801-84894750	1	84892801	84894750	NA	null					Not found	0	4.94785	5.61356	5.93185	6.27144	5.04439	5.8357	5.74496	5.4041	4.2142	4.43607	5.79553	4.1986	6.30677	4.91211	5.16963	4.94186	4.2008	5.9891	4.81832	6.48878
Chr1:84907651-84908700	1	84907651	84908700	NA	null					Not found	0	4.50039	3.29163	5.20393	5.05845	4.70044	6.55918	4.87049	3.98906	2.62924	2.97664	6.38049	5.82663	5.08438	4.75164	4.38536	5.37482	5.68622	4.24186	3.73086	5.01929
Chr1:84944251-84945900	1	84944251	84945900	NA	RPF1-002	ENSP00000359690	ribosome production factor 1 homolog (S. cerevisiae) [Source:HGNC Symbol;Acc:30350]	+	CDS	overlapping	0	9.24553	9.76736	8.81126	9.05845	8.37069	9.20385	9.52711	9.00401	9.09956	9.05879	9.24351	8.54652	9.64153	9.47154	8.87007	8.95533	8.55129	9.206	9.32705	9.21367
Chr1:84970051-84973200	1	84970051	84973200	NA	GNG5-002	ENSP00000359679	guanine nucleotide binding protein (G protein), gamma 5 [Source:HGNC Symbol;Acc:4408]	-	CDS	overlapping	0	10.7603	10.7771	10.4789	10.6772	9.97011	10.6656	10.5445	10.5774	10.2513	10.2827	10.3205	10.14	10.7509	10.5934	10.4188	10.3134	10.2083	10.0784	10.5779	10.7597
Chr1:85064401-85065900	1	85064401	85065900	NA	null					Not found	0	5.62592	4.67014	7.53484	7.09087	7.89482	9.71321	5.70056	8.49156	4.85163	6.36896	7.90132	9.4396	5.78482	3.83411	8.60345	8.55067	9.22464	5.43451	4.73086	5.71117
Chr1:85068901-85071150	1	85068901	85071150	NA	null					Not found	0	5.94785	5.72459	9.56368	9.5386	9.22159	10.1743	7.09288	9.20284	6.08867	7.14656	9.43436	9.53682	8.44193	5.41907	9.70729	9.926	9.64042	5.64396	7.74209	6.84241
Chr1:85084651-85087350	1	85084651	85087350	NA	null					Not found	0	8.90514	9.01955	10.0241	9.91643	9.68825	9.55154	9.2202	9.97142	9.08867	7.88353	10.2276	9.28991	9.23074	7.6067	10.4418	9.71533	9.30793	7.6919	10.3909	8.54767
Chr1:85098301-85099350	1	85098301	85099350	NA	C1orf180-001	ENSP00000359658	chromosome 1 open reading frame 180 [Source:HGNC Symbol;Acc:26647]	-	CDS	downstream	911	5.28888	5.29163	7.33321	6.97406	6.67243	7.32829	6.6313	6.4041	4.74472	6.14656	4.5199	6.09672	5.49942	4.83411	8.24334	5.82939	6.42319	5.82683	7.97879	6.27305
Chr1:85155001-85157100	1	85155001	85157100	NA	null					Not found	0	10.1097	10.4353	10.0209	9.86111	9.38154	10.4038	9.82985	9.87442	11.09	9.16151	10.2464	8.35387	10.2409	9.8954	9.9968	10.1238	8.69905	6.9423	9.50235	9.4584
Chr1:85163701-85165200	1	85163701	85165200	NA	null					Not found	0	7.36288	5.77706	9.36883	9.4128	8.75154	9.73811	7.19242	8.74987	10.0471	7.10592	7.5939	8.23901	8.78482	6.893	9.70127	8.30644	8.64263	2.43451	9.06178	5.71117
Chr1:85237801-85238850	1	85237801	85238850	NA	null					Not found	0	4.84831	4.67014	6.59625	5.24287	4.75489	6.08186	5.15999	4.98906	7.41932	5.43607	4.35943	3.73916	5.85697	4.91211	5.07342	5.78986	3.46383	6.71991	4.05279	5.96271
Chr1:85319551-85321500	1	85319551	85321500	NA	LPAR3-001	ENSP00000395389	lysophosphatidic acid receptor 3 [Source:HGNC Symbol;Acc:14298]	-	CDS	overlapping	0	4.50039	5.61356	7.13467	6.15361	7.60733	7.6091	6.09288	7.08592	6.79916	4.29857	8.5984	8.33908	5.25431	5.24914	7.24886	8.02082	6.40243	5.38871	5.31582	5.90381
Chr1:85357951-85359600	1	85357951	85359600	NA	null					Not found	0	3.84831	7.56961	4.45186	5.95657	3.16992	5.05329	4.60745	3.14106	5.56784	4.97664	9.64266	2.32413	2.08438	4.12361	3.67487	2.61994	2.61583	4.75644	4.53822	6.96271
Chr1:85410151-85412400	1	85410151	85412400	NA	MCOLN2-001	ENSP00000359640	mucolipin 2 [Source:HGNC Symbol;Acc:13357]	-	CDS	overlapping	0	4.7414	6.39597	8.69177	9.61582	8.6865	8.77575	6.42848	6.94842	6.40183	5.43607	6.46179	8.07008	7.15763	5.36462	8.78149	7.71797	8.40243	7.3887	7.15713	8.54767
Chr1:85527451-85528500	1	85527451	85528500	NA	null					Not found	0	4.62592	5.36202	7.54378	7.00841	6.58496	8.21033	6.85031	6.70178	4.36621	4.88353	8.63391	8.23102	4.58688	5.61838	6.55529	7.34786	8.64705	4.60443	5.19029	4.1262
Chr1:85574851-85575600	1	85574851	85575600	NA	WDR63-004	ENSP00000359628	WD repeat domain 63 [Source:HGNC Symbol;Acc:30711]	+	CDS	overlapping	0	1.04096	0.969701	1.20393	2.18398	2.32193	1.40943	3.28553	0.819136	2.62924	3.5616	1.85693	3.06109	0.49942	2.98611	2.53736	0.619936	3.46383	2.01947	1.73086	3.64078
Chr1:85582201-85583100	1	85582201	85583100	NA	WDR63-004	ENSP00000359628	WD repeat domain 63 [Source:HGNC Symbol;Acc:30711]	+	CDS	overlapping	0	3.62592	0.969701	1.78889	2.18398	1.58496	2.40943	3.02249	0.819136	2.62924	2.97664	0.271968	1.73916	0.49942	2.66418	0.215436	0.619936	3.46383	2.75644	2.31582	2.90381
Chr1:85724401-85726050	1	85724401	85726050	NA	C1orf52-001	ENSP00000419417	chromosome 1 open reading frame 52 [Source:HGNC Symbol;Acc:24871]	-	CDS	overlapping	0	8.95385	9.06773	9.06191	8.82784	8.36194	9.52057	9.2202	9.22853	9.1787	9.14155	9.42679	8.75039	9.28405	9.11127	9.06406	9.03356	8.37605	8.90211	9.14025	8.89628
Chr1:85729351-85730550	1	85729351	85730550	NA	BCL10-001	ENSP00000359612	B-cell CLL/lymphoma 10 [Source:HGNC Symbol;Acc:989]	-	CDS	upstream	2760	4.04096	3.77706	3.78889	4.05845	3.80735	4.57936	3.50792	4.14106	4.2142	4.14656	2.85693	3.06109	3.30677	2.24914	2.8004	3.78986	4.2008	3.43451	4.31582	4.90381
Chr1:85744201-85745850	1	85744201	85745850	NA	BCL10-001	ENSP00000359612	B-cell CLL/lymphoma 10 [Source:HGNC Symbol;Acc:989]	-	CDS	downstream	2166	6.50039	4.87659	8.4231	9.69177	9.2738	8.84406	6.34442	8.80213	6.40183	6.62049	8.80724	9.40805	6.64917	5.41907	9.37783	9.39472	9.33282	6.13495	7.92069	6.6764
Chr1:85754251-85756650	1	85754251	85756650	NA	null					Not found	0	6.21088	5.42913	7.70377	8.77394	7.97154	6.24232	6.05812	6.4041	5.56784	5.62049	4.79553	8.88382	4.74735	4.75164	8.40031	8.12773	6.83306	6.31715	4.63775	6.74511
Chr1:85762801-85764750	1	85762801	85764750	NA	null					Not found	0	6.59554	7.23649	8.70775	9.83981	8.61839	7.74928	7.401	7.738	4.62924	5.5616	5.82656	9.30141	8.09933	6.68655	10.0228	8.86311	8.7327	7.45688	8.00699	8.00535
Chr1:85773301-85774650	1	85773301	85774650	NA	null					Not found	0	5.62592	4.77706	5.66336	7.07475	6.33985	6.26741	5.91002	5.3427	4.74472	5.5002	5.69823	7.86845	6.94236	5.98611	8.01634	7.11179	7.65146	6.1894	6.37472	7.36324
Chr1:85779301-85780500	1	85779301	85780500	NA	null					Not found	0	5.36288	4.29163	6.90437	6.82784	7.3837	6.71321	5.45545	7.15899	5.04428	4.97664	5.55737	9.56571	6.82135	4.24914	8.14617	7.60862	9.14877	6.68244	6.01626	6.8107
Chr1:85794151-85796700	1	85794151	85796700	NA	DDAH1-001	ENSP00000284031	dimethylarginine dimethylaminohydrolase 1 [Source:HGNC Symbol;Acc:2715]	-	CDS	overlapping	0	8.58785	6.39597	8.98856	9.54153	9.45738	9.45109	8.86043	8.91717	6.2922	8.97664	5.40125	10.8146	9.4033	8.148	10.32	9.4903	10.6326	8.52197	9.711	9.69389
Chr1:85804351-85805550	1	85804351	85805550	NA	DDAH1-001	ENSP00000284031	dimethylarginine dimethylaminohydrolase 1 [Source:HGNC Symbol;Acc:2715]	-	CDS	overlapping	0	4.21088	4.13963	5.45186	5.12258	5.78136	5.21679	5.55854	5.51958	4.62924	4.29857	1.85693	6.80525	6.3574	5.0565	6.65838	4.42729	6.90861	4.68244	6.48575	6.40631
Chr1:85872451-85873500	1	85872451	85873500	NA	DDAH1-001	ENSP00000284031	dimethylarginine dimethylaminohydrolase 1 [Source:HGNC Symbol;Acc:2715]	-	CDS	overlapping	0	8.14948	8.55466	7.20393	8.3738	7.17991	8.36943	8.80385	5.72603	3.62924	7.97664	3.97241	7.75039	8.68924	8.27889	8.2378	4.32038	8.42319	7.71063	8.81301	9.56202
Chr1:85916101-85917900	1	85916101	85917900	NA	DDAH1-001	ENSP00000284031	dimethylarginine dimethylaminohydrolase 1 [Source:HGNC Symbol;Acc:2715]	-	CDS	overlapping	0	5.36288	5.05716	4.59625	5.3539	4.24793	5.61888	5.55854	5.21145	5.50371	4.88353	3.44189	5.78356	6.97515	6.24914	4.12233	2.94186	5.78576	5.3414	5.4313	7.34122
Chr1:85929451-85931700	1	85929451	85931700	NA	DDAH1-001	ENSP00000284031	dimethylarginine dimethylaminohydrolase 1 [Source:HGNC Symbol;Acc:2715]	-	CDS	overlapping	0	10.1599	10.4595	8.80012	9.51191	8.96	9.67153	10.4387	9.94067	9.62171	10.6313	9.53641	9.95348	10.6053	10.6052	9.66871	9.89606	9.64926	9.2674	9.8524	10.7885
Chr1:85986151-85988400	1	85986151	85988400	NA	null					Not found	0	5.62592	5.21763	8.02411	9.40637	8.19476	9.27979	6.15999	8.01881	6.40183	5.83462	8.56659	9.42216	5.78482	5.87364	9.21262	6.59722	9.15809	7.30487	6.05279	7.27305
Chr1:86041801-86043600	1	86041801	86043600	NA	CYR61-001	ENSP00000398736	cysteine-rich, angiogenic inducer, 61 [Source:HGNC Symbol;Acc:2654]	+	CDS	downstream	3068	8.42466	9.26891	9.18407	9.46938	9.04985	9.8167	8.91002	9.62971	7.74472	9.6526	10.2818	10.5497	9.61836	9.16403	9.77959	9.88203	10.2335	9.65125	9.44854	9.98063
Chr1:86045701-86048250	1	86045701	86048250	NA	CYR61-001	ENSP00000398736	cysteine-rich, angiogenic inducer, 61 [Source:HGNC Symbol;Acc:2654]	+	CDS	overlapping	0	8.72746	9.48145	9.91301	10.144	9.73809	10.3896	9.20041	9.77624	7.96314	9.47648	10.0631	10.8359	9.74497	9.56203	10.0656	10.5727	10.5203	9.3444	9.01163	9.84633
Chr1:86072401-86074050	1	86072401	86074050	NA	null					Not found	0	4.21088	5.29163	9.02411	9.26435	9.05799	7.16432	5.15999	7.29487	5.13174	3.97664	6.20271	9.90909	5.49942	3.47154	9.57519	8.83426	9.34919	6.1894	5.12318	5.90381
Chr1:86094001-86096250	1	86094001	86096250	NA	null					Not found	0	6.62592	7.98093	8.64687	9.8658	9.20457	9.80389	7.31527	7.76165	5.56784	7.57655	4.66429	10.3222	9.48241	7.50967	8.48222	9.68333	10.2967	8.46241	6.88061	7.31885
Chr1:86173351-86174850	1	86173351	86174850	NA	ZNHIT6-001	ENSP00000359606	zinc finger, HIT-type containing 6 [Source:HGNC Symbol;Acc:26089]	-	CDS	overlapping	0	8.91132	9.63148	8.85498	8.98703	8.6865	9.00189	9.34802	8.74987	9.52001	9.14155	9.49838	8.93392	9.30032	9.30081	9.07342	8.92372	9.11089	9.01947	9.07516	9.42214
Chr1:86315401-86316750	1	86315401	86316750	NA	COL24A1-001	ENSP00000359603	collagen, type XXIV, alpha 1 [Source:HGNC Symbol;Acc:20821]	-	CDS	overlapping	0	4.04096	3.55466	5.93185	6.8658	5.20945	5.31632	5.34442	3.62649	3.85163	4.14656	1.85693	7.8372	2.08438	2.66418	5.50084	0.619936	8.78976	4.52197	3.73086	4.90381
Chr1:86860801-86862750	1	86860801	86862750	NA	null					Not found	0	5.7414	8.84622	9.06501	9.05845	7.98299	9.12024	9.30048	8.16786	8.90846	8.39449	9.89585	9.44307	7.8123	8.559	8.99022	9.07115	9.10126	9.17934	7.69665	9.66758
Chr1:87113701-87114600	1	87113701	87114600	NA	null					Not found	0	3.36288	2.9697	3.01128	5.05845	4.75489	1.99439	4.02249	2.4041	3.3662	0.976638	0.271968	4.73916	1.49942	2.98611	2.21544	2.94186	5.42319	3.24186	1.73086	2.31885
Chr1:87169651-87171450	1	87169651	87171450	NA	SH3GLB1-001	ENSP00000212369	SH3-domain GRB2-like endophilin B1 [Source:HGNC Symbol;Acc:10833]	+	CDS	overlapping	0	10.1573	10.3556	10.1078	10.3672	9.69349	10.037	10.3958	10.2093	10.8008	10.6078	10.2421	10.0407	10.3339	10.2734	10.0467	10.2835	9.93956	10.0529	10.4503	10.6475
Chr1:87238951-87241200	1	87238951	87241200	NA	null					Not found	0	8.11777	6.72459	7.88341	8.59337	8.17493	6.67622	8.86043	8.58069	6.32968	8.36034	7.89402	9.47387	8.79863	9.29354	8.94676	6.45283	9.06869	7.55345	10.5382	8.5283
Chr1:87246001-87247350	1	87246001	87247350	NA	null					Not found	0	4.7414	4.9697	6.78889	5.68648	5.85798	5.57936	6.19242	7.76165	5.85163	4.67708	4.5199	6.57205	5.85697	5.30804	6.42489	3.42729	6.3383	6.01947	7.34557	6.56678
Chr1:87311701-87312600	1	87311701	87312600	NA	null					Not found	0	3.04096	4.13963	6.74309	5.50591	4.08746	4.86886	4.60745	6.4041	4.04428	4.29857	4.66429	5.1986	4.66934	4.57107	6.72323	3.42729	5.75334	5.4789	5.77526	5.01929
Chr1:87606301-87607200	1	87606301	87607200	NA	HS2ST1-003	ENSP00000359579	heparan sulfate 2-O-sulfotransferase 1 [Source:HGNC Symbol;Acc:5193]	+	CDS	overlapping	0	4.04096	4.29163	6.31245	6.15361	6.90689	3.40943	4.94849	4.98906	3.3662	3.78399	2.5939	3.06109	4.19986	4.47154	6.9968	5.47792	3.10126	4.52197	3.90079	4.90381
Chr1:87689701-87690600	1	87689701	87690600	NA	null					Not found	0	5.79584	4.42913	8.08657	7.97406	8.06609	7.5693	6.53345	8.18546	4.36621	7.0641	5.91582	4.82663	7.22734	4.57107	8.739	7.27815	4.75334	6.68244	7.51222	6.17683
Chr1:87715051-87716250	1	87715051	87716250	NA	null					Not found	0	4.84831	3.55466	4.78889	2.92094	2.80735	4.65736	5.09288	3.62649	3.62924	3.5616	1.27197	0.739163	3.66934	4.36462	3.91588	2.94186	2.61583	4.60443	4.19029	5.01929
Chr1:87857851-87859200	1	87857851	87859200	NA	null					Not found	0	6.59554	6.46155	7.09875	8.00841	6.65821	7.89325	7.25515	7.06706	6.68813	6.83462	6.29434	4.90909	7.86574	6.94958	8.53285	6.34786	2.61583	7.71063	7.2066	7.58564
Chr1:87864301-87865500	1	87864301	87865500	NA	null					Not found	0	7.1907	6.77706	8.10479	6.38038	6.82018	8.51795	6.85031	5.4041	6.56784	5.83462	5.99989	3.90909	7.86574	6.83411	7.77003	7.5388	1.87887	8.21587	6.28545	7.48878
Chr1:88066201-88067250	1	88066201	88067250	NA	null					Not found	0	5.79584	4.67014	5.11082	3.18398	3.16992	5.76698	6.12683	5.46299	3.85163	5.22457	0.271968	2.73916	7.99127	5.36462	4.12233	0.619936	1.29391	5.60443	7.82889	6.71117
Chr1:88177801-88178550	1	88177801	88178550	NA	null					Not found	0	5.43327	4.42913	4.01128	3.18398	2.32193	3.40943	5.28553	2.4041	3.85163	3.5616	0.271968	3.06109	4.19986	4.57107	3.21544	2.94186	2.87887	5.1894	4.19029	5.56678
Chr1:88260451-88261800	1	88260451	88261800	NA	null					Not found	0	5.28888	5.67014	5.11082	5.18398	7.53916	5.40943	5.87049	4.62649	5.62924	3.29857	3.07932	4.90909	5.85697	5.57107	7.77003	5.47792	5.04879	5.24186	3.73086	6.60425
Chr1:88271101-88272450	1	88271101	88272450	NA	null					Not found	0	4.84831	4.87659	8.06191	8.50591	9.0954	9.11679	5.50792	5.3427	3.85163	3.78399	0.271968	2.32413	6.11413	4.47154	9.35243	7.88672	1.29391	6.13495	4.97879	6.8107
Chr1:88421401-88422450	1	88421401	88422450	NA	null					Not found	0	5.12842	4.55466	6.35367	7.16887	6.79442	7.30425	5.34442	6.57402	4.04428	4.88353	2.5939	0.739163	6.45362	4.47154	6.36518	5.97749	1.87887	5.68244	5.05279	7.07374
Chr1:88466851-88467750	1	88466851	88467750	NA	null					Not found	0	3.84831	4.13963	5.15812	4.84694	4.70044	4.80175	4.87049	5.06706	4.62924	2.97664	1.27197	0.739163	3.82135	4.36462	3.21544	4.86786	1.87887	5.52197	4.05279	5.71117
Chr1:88641001-88642050	1	88641001	88642050	NA	null					Not found	0	6.94785	4.87659	4.01128	3.59902	4.39232	5.26741	6.25515	6.54706	7.06664	4.88353	0.271968	3.54652	6.60794	5.47154	5.77003	4.32038	1.87887	6.58426	7.62568	7.38494
Chr1:88777351-88778100	1	88777351	88778100	NA	null					Not found	0	5.28888	3.9697	4.72749	6.55321	4.90689	2.99439	5.94849	3.4041	3.04428	4.5616	4.91582	3.06109	4.40631	5.18774	2.53736	0.619936	0.293905	4.75644	5.4313	5.31885
Chr1:88792951-88794150	1	88792951	88794150	NA	null					Not found	0	9.06886	6.2551	8.93864	9.11077	8.35755	8.78881	9.65185	7.80782	5.43659	9.1714	5.99989	5.78356	9.64917	9.29718	9.13132	6.72846	5.99434	8.28626	9.69376	9.01234
Chr1:89060701-89061750	1	89060701	89061750	NA	null					Not found	0	4.50039	3.77706	3.37385	3.18398	3.45943	4.65736	3.87049	4.62649	4.85163	4.43607	0.271968	2.32413	5.02298	4.83411	3.21544	0.619936	3.10126	4.68244	3.53822	4.90381
Chr1:89078101-89079150	1	89078101	89079150	NA	null					Not found	0	3.84831	1.9697	3.20393	4.29946	2.58496	3.21679	4.50792	3.81914	4.62924	2.5616	1.85693	3.54652	4.40631	3.24914	4.38536	1.61994	1.29391	4.24186	3.53822	5.48878
Chr1:89148901-89151300	1	89148901	89151300	NA	PKN2-001	ENSP00000359552	protein kinase N2 [Source:HGNC Symbol;Acc:9406]	+	CDS	overlapping	0	10.3561	10.5358	9.8057	9.67583	9.17742	9.93691	10.11	9.94584	10.3774	10.1162	9.95672	9.46026	10.1859	10.3242	9.65838	9.76459	9.48126	9.82683	10.0392	9.99481
Chr1:89228551-89230350	1	89228551	89230350	NA	PKN2-001	ENSP00000359552	protein kinase N2 [Source:HGNC Symbol;Acc:9406]	+	CDS	overlapping	0	4.50039	4.13963	5.29139	6.24287	4.24793	5.21679	4.50792	5.67712	4.74472	3.5616	2.5939	7.33908	4.82135	4.66418	3.8004	2.94186	6.89382	4.68244	4.31582	5.40631
Chr1:89238901-89240700	1	89238901	89240700	NA	PKN2-001	ENSP00000359552	protein kinase N2 [Source:HGNC Symbol;Acc:9406]	+	CDS	overlapping	0	5.56452	4.9697	6.86214	7.82784	7.11894	6.51795	5.55854	7.3427	5.50371	4.43607	4.07932	6.29375	5.45362	4.12361	3.91588	6.1435	5.90861	4.13495	5.12318	6.17683
Chr1:89268151-89269350	1	89268151	89269350	NA	PKN2-001	ENSP00000359552	protein kinase N2 [Source:HGNC Symbol;Acc:9406]	+	CDS	overlapping	0	4.36288	1.9697	2.52586	3.92094	4.39232	6.24232	4.60745	4.14106	4.50371	4.67708	2.27197	7.71644	4.66934	5.61838	4.21544	4.2049	7.82529	6.4789	4.19029	4.48878
Chr1:89356651-89359050	1	89356651	89359050	NA	GTF2B-001	ENSP00000359531	general transcription factor IIB [Source:HGNC Symbol;Acc:4648]	-	CDS	overlapping	0	9.56843	9.8554	8.93864	8.84219	8.49586	9.3103	9.7747	9.58401	10.0777	9.7743	9.29156	8.38302	9.78944	9.68377	8.91588	9.07526	8.37605	9.38871	9.18619	9.46351
Chr1:89449951-89452050	1	89449951	89452050	NA	CCBL2-004	ENSP00000260508	cysteine conjugate-beta lyase 2 [Source:HGNC Symbol;Acc:33238]	-	CDS	overlapping	0	7.04096	8.23649	9.17547	8.57056	8.50779	7.95632	7.74496	6.51958	8.43659	7.57655	8.53875	8.16543	7.59745	7.68655	9.57079	7.57413	8.46883	6.95807	8.34557	8.86574
Chr1:89457151-89459550	1	89457151	89459550	NA	CCBL2-004	ENSP00000260508	cysteine conjugate-beta lyase 2 [Source:HGNC Symbol;Acc:33238]	-	CDS	downstream	3118	9.26012	10.2033	9.80384	9.6785	9.25739	9.91326	9.98133	9.49862	10.0777	9.99901	10.2159	9.40094	10.326	10.1277	9.89316	9.7206	9.20978	9.99293	9.81567	10.2904
Chr1:89487151-89489100	1	89487151	89489100	NA	GBP3-001	ENSP00000359513	guanylate binding protein 3 [Source:HGNC Symbol;Acc:4184]	-	CDS	downstream	747	3.84831	5.36202	9.41825	9.55612	8.96867	9.74928	5.98597	8.11376	4.74472	3.5616	6.55737	9.7643	7.76621	4.47154	9.06406	9.09161	9.96633	5.86077	8.51222	7.40631
Chr1:89551351-89551950	1	89551351	89551950	NA	null					Not found	0	3.62592	0.969701	1.78889	2.18398	0	1.40943	2.70056	1.81914	3.85163	2.5616	0.271968	0.739163	0.49942	2.24914	1.21544	0.619936	0.293905	1.43451	2.73086	4.1262
Chr1:89591251-89592300	1	89591251	89592300	NA	GBP2-001	ENSP00000434282	guanylate binding protein 2, interferon-inducible [Source:HGNC Symbol;Acc:4183]	-	CDS	downstream	3602	3.84831	4.77706	8.20955	8.5763	7.93664	6.16432	5.78803	7.49156	5.13174	3.97664	7.79553	7.41159	6.87446	4.66418	8.15207	7.18979	8.04879	6.73829	7.51222	7.01929
Chr1:89948701-89949450	1	89948701	89949450	NA	null					Not found	0	2.04096	2.55466	3.90437	1.59902	3	1.99439	3.50792	0.819136	5.62924	3.29857	0.271968	3.73916	0.49942	2.66418	3.21544	0.619936	5.93776	2.01947	3.90079	5.22574
Chr1:89981251-89982450	1	89981251	89982450	NA	null					Not found	0	3.36288	4.77706	8.23735	7.10681	8.24793	5.8357	5.09288	5.51958	5.56784	3.29857	1.85693	6.1986	4.82135	3.83411	8.40031	3.78986	8.17655	4.13495	3.90079	5.40631
Chr1:89989351-89991450	1	89989351	89991450	NA	null					Not found	0	9.07987	10.6701	9.66131	8.80359	9.26444	8.81882	9.93658	9.41533	10.8108	10.2504	10.2247	9.19037	9.34177	10.2604	9.51464	9.43692	9.93234	9.74285	9.35291	10.2106
Chr1:90190051-90191100	1	90190051	90191100	NA	LRRC8C-004	ENSP00000359482	leucine rich repeat containing 8 family, member C [Source:HGNC Symbol;Acc:25075]	+	CDS	overlapping	0	3.04096	4.42913	5.33321	3.18398	4.75489	6.08186	6.05812	7.5606	8.88348	4.78399	7.40125	6.46708	5.78482	5.47154	2.53736	6.72846	5.81747	5.13495	5.48575	5.96271
Chr1:90269851-90270900	1	90269851	90270900	NA	LRRC8C-004	ENSP00000359482	leucine rich repeat containing 8 family, member C [Source:HGNC Symbol;Acc:25075]	+	CDS	overlapping	0	4.36288	5.29163	5.56148	3.92094	4.85798	2.73136	4.02249	2.81914	4.85163	4.67708	1.85693	0.739163	5.08438	4.91211	5.07342	1.61994	1.87887	4.13495	5.48575	5.77828
Chr1:90308251-90309900	1	90308251	90309900	NA	LRRC8C-004	ENSP00000359482	leucine rich repeat containing 8 family, member C [Source:HGNC Symbol;Acc:25075]	+	CDS	overlapping	0	10.2841	10.801	9.71568	9.61304	9.633	9.67622	10.0778	8.74395	10.2827	10.269	9.86816	9.33162	10.3003	9.96796	9.76811	9.81469	9.44365	9.85657	10.0528	10.461
Chr1:90330901-90332400	1	90330901	90332400	NA	null					Not found	0	5.04096	5.55466	5.37385	5.12258	6.71425	5.05329	4.15999	5.81914	5.2142	4.29857	2.5939	7.38302	5.40631	4.24914	7.43461	2.61994	6.92326	4.89394	4.97879	5.77828
Chr1:90355501-90356400	1	90355501	90356400	NA	null					Not found	0	5.50039	5.13963	8.12874	7.3672	8.29002	2.73136	6.05812	6.06706	3.62924	6.14656	6.64701	4.64605	6.3574	4.57107	8.35499	6.66433	4.61583	5.1894	7.55104	6.17683
Chr1:90411001-90412200	1	90411001	90412200	NA	null					Not found	0	5.56452	6.29163	7.19261	5.99133	7.77479	6.49689	5.28553	5.27857	5.36621	4.43607	3.44189	4.64605	6.38206	5.61838	6.87365	4.78986	4.2939	6.31715	6.63775	7.22574
Chr1:90418201-90419550	1	90418201	90419550	NA	null					Not found	0	4.7414	6.46155	7.63019	7.5763	8.90689	5.80175	5.60745	7.65203	4.50371	4.67708	5.69823	8.17379	5.30677	4.57107	7.9968	6.4013	7.72853	5.56379	5.48575	6.56678
Chr1:90459751-90461550	1	90459751	90461550	NA	ZNF326-201	ENSP00000378091	zinc finger protein 326 [Source:HGNC Symbol;Acc:14104]	+	CDS	overlapping	0	9.88331	10.2176	9.61544	9.59902	9.40727	9.29817	9.91488	9.42647	10.373	9.95963	9.88115	9.42916	10.0131	10.0651	9.75265	9.68333	9.26545	9.62186	9.58884	10.2437
Chr1:90739651-90740550	1	90739651	90740550	NA	null					Not found	0	4.36288	4.13963	4.84778	3.40637	3.16992	6.65736	5.91002	4.27857	5.2142	2.5616	7.12995	3.54652	2.08438	4.47154	4.46336	2.94186	3.29391	6.95807	3.31582	5.96271
Chr1:90868351-90869550	1	90868351	90869550	NA	null					Not found	0	5.79584	5.77706	8.09875	9.08283	7.94251	7.64784	6.53345	6.3427	7.45367	3.97664	6.62952	5.32413	7.79404	8.09045	8.85929	6.11179	5.2008	7.1894	6.63775	7.44813
Chr1:91286701-91287600	1	91286701	91287600	NA	null					Not found	0	3.84831	4.29163	6.52586	6.66511	6.20945	6.08186	4.401	3.98906	4.2142	3.78399	4.27197	3.06109	4.40631	3.83411	5.34472	5.1435	1.87887	2.75644	5.4313	5.01929
Chr1:91486351-91488450	1	91486351	91488450	NA	null					Not found	0	10.3963	10.7379	10.2415	10.2338	9.75989	9.94859	10.5678	10.26	10.8991	10.4923	10.2276	9.93884	10.471	10.667	10.1298	10.1764	9.79574	10.2753	10.4399	10.9243
Chr1:91852351-91853550	1	91852351	91853550	NA	HFM1-002	ENSP00000359454	HFM1, ATP-dependent DNA helicase homolog (S. cerevisiae) [Source:HGNC Symbol;Acc:20193]	-	CDS	overlapping	0	8.52477	7.42913	7.78136	6.78884	7.6865	7.09593	7.85031	8.0383	7.97501	7.26204	7.9373	7.39737	6.92568	7.30804	7.27072	6.95979	6.38137	7.87745	7.94032	7.60425
Chr1:91965451-91967550	1	91965451	91967550	NA	CDC7-001	ENSP00000234626	cell division cycle 7 homolog (S. cerevisiae) [Source:HGNC Symbol;Acc:1745]	+	CDS	overlapping	0	10.6464	10.6788	10.04	9.54446	9.31741	10.2798	10.4234	9.14557	11.09	10.5484	10.0202	9.84245	10.4198	10.556	9.82277	9.73368	9.27404	10.3667	9.68796	10.9446
Chr1:92034901-92036100	1	92034901	92036100	NA	null					Not found	0	6.12842	6.69762	6.33321	4.29946	6.83289	8.8357	5.60745	7.17669	4.2142	5.93083	7.66429	7.99655	8.68429	6.02173	4.97032	7.37482	7.3383	7.56379	5.25442	8.28463
Chr1:92074351-92075850	1	92074351	92075850	NA	null					Not found	0	5.12842	5.61356	4.72749	2.18398	5.70044	7.57936	4.94849	4.98906	3.62924	4.88353	3.85693	9.6758	5.6287	3.98611	4.3029	4.2049	7.56069	6.21587	3.90079	7.69389
Chr1:92197651-92198850	1	92197651	92198850	NA	TGFBR3-001	ENSP00000359426	transforming growth factor, beta receptor III [Source:HGNC Symbol;Acc:11774]	-	CDS	overlapping	0	6.08535	5.67014	6.81864	6.82784	6.58496	8.10987	4.401	5.62649	6.04428	4.78399	6.12995	7.60953	8.45362	5.18774	5.25983	6.82939	7.3383	6.89394	4.4313	7.71117
Chr1:92202151-92203350	1	92202151	92203350	NA	TGFBR3-001	ENSP00000359426	transforming growth factor, beta receptor III [Source:HGNC Symbol;Acc:11774]	-	CDS	overlapping	0	5.28888	6.01409	6.31245	5.7283	7.06609	8.60419	6.28553	5.27857	5.50371	5.14656	5.7314	8.18211	5.70887	5.12361	5.60775	7.01225	7.50336	5.60443	4.31582	7.60425
Chr1:92269351-92271000	1	92269351	92271000	NA	TGFBR3-001	ENSP00000359426	transforming growth factor, beta receptor III [Source:HGNC Symbol;Acc:11774]	-	CDS	overlapping	0	5.12842	5.9239	4.45186	2.92094	6.96578	7.95632	5.74496	4.98906	6.2142	4.5616	6.5199	5.26273	6.97515	4.98611	3.91588	4.61994	5.84849	7.48979	4.19029	8.61347
Chr1:92350801-92352450	1	92350801	92352450	NA	null					Not found	0	9.58399	10.2009	8.67153	7.75889	7.40939	9.78447	9.20836	8.53338	9.2731	9.71135	10.1159	9.53358	10.1842	9.68655	7.87365	9.30644	9.37339	9.59438	9.50894	10.4963
Chr1:92355301-92357250	1	92355301	92357250	NA	null					Not found	0	6.25041	5.82768	6.01128	4.68648	6.26679	6.51795	5.28553	5.06706	5.2922	4.14656	7.82656	6.38302	6.08438	4.91211	4.739	4.52683	5.87887	6.04922	4.81832	7.1262
Chr1:92406901-92407650	1	92406901	92407650	NA	null					Not found	0	3.62592	3.29163	3.20393	5.29946	6.88264	3.40943	3.28553	0.819136	4.2142	2.5616	1.27197	3.06109	2.49942	3.24914	6.36518	2.94186	2.61583	3.60443	3.90079	4.64078
Chr1:92494951-92497200	1	92494951	92497200	NA	EPHX4-001	ENSP00000359410	epoxide hydrolase 4 [Source:HGNC Symbol;Acc:23758]	+	CDS	overlapping	0	8.11777	9.63504	9.19261	9.92545	9.44294	4.99439	8.67211	6.65203	7.96314	7.93083	8.81886	7.98709	6.17184	8.4586	9.6099	9.78986	5.42319	9.206	7.2066	9.71973
Chr1:92545201-92546850	1	92545201	92546850	NA	BTBD8-001	ENSP00000359408	BTB (POZ) domain containing 8 [Source:HGNC Symbol;Acc:21019]	+	CDS	overlapping	0	7.34474	8.26432	8.3638	8.23564	7.78136	8.06048	8.11842	7.21145	8.12109	6.85928	8.72318	7.90909	7.21367	7.4586	8.42489	8.18979	7.98041	8.03442	8.11457	8.51852
Chr1:92763751-92765400	1	92763751	92765400	NA	RPAP2-001	ENSP00000359368	RNA polymerase II associated protein 2 [Source:HGNC Symbol;Acc:25791]	+	CDS	overlapping	0	10.0689	10.3833	9.57897	9.39668	9.13955	9.61888	9.85538	9.5606	10.3181	10.0481	9.82656	9.18625	10.023	10.0063	9.56416	9.74922	9.3893	9.78102	9.5155	9.85023
Chr1:93145201-93146250	1	93145201	93146250	NA	EVI5-001	ENSP00000359356	ecotropic viral integration site 5 [Source:HGNC Symbol;Acc:3501]	-	CDS	overlapping	0	3.36288	2.55466	3.37385	2.59902	4.58496	4.57936	4.401	1.81914	1.04428	3.78399	1.27197	3.90909	3.08438	2.24914	2.8004	0.619936	2.29391	3.75644	3.05279	5.71117
Chr1:93249601-93251550	1	93249601	93251550	NA	EVI5-001	ENSP00000359356	ecotropic viral integration site 5 [Source:HGNC Symbol;Acc:3501]	-	CDS	overlapping	0	9.79918	9.98929	9.45659	9.60183	9.11114	9.8315	9.72015	9.69872	8.48722	9.50802	10.3594	9.22298	9.80776	9.72758	9.30555	9.67793	9.26545	9.2674	9.3855	9.60887
Chr1:93270001-93271050	1	93270001	93271050	NA	null					Not found	0	5.28888	8.67014	7.25921	6.38038	6.08746	5.96402	7.52074	5.62649	4.2142	8.69088	6.94439	8.48736	7.25431	7.07357	6.59048	4.86786	7.93776	6.54303	6.25442	8.5283
Chr1:93297001-93299250	1	93297001	93299250	NA	RPL5-001	ENSP00000359345	ribosomal protein L5 [Source:HGNC Symbol;Acc:10360]	+	CDS	overlapping	0	9.90823	10.2271	9.58114	9.6785	9.03342	9.44285	9.70338	9.42647	9.65161	9.81584	9.76382	9.57837	9.66181	9.65002	9.46099	9.31342	9.10769	9.6966	9.41736	9.78646
Chr1:93324151-93325200	1	93324151	93325200	NA	FAM69A-001	ENSP00000359333	family with sequence similarity 69, member A [Source:HGNC Symbol;Acc:32213]	-	CDS	overlapping	0	6.04096	6.49326	6.41338	6.02528	4.58496	4.31632	6.45545	4.14106	5.68813	5.83462	2.5939	4.64605	5.45362	5.18774	4.60775	3.61994	4.81747	4.95807	7.07071	7.04677
Chr1:93374401-93375600	1	93374401	93375600	NA	FAM69A-001	ENSP00000359333	family with sequence similarity 69, member A [Source:HGNC Symbol;Acc:32213]	-	CDS	overlapping	0	5.04096	5.29163	8.46602	6.99133	7.2384	5.36363	5.28553	5.62649	3.04428	5.5002	2.5939	7.50735	4.30677	5.83411	8.42976	6.29236	6.92326	4.13495	4.90079	5.84241
Chr1:93415501-93417600	1	93415501	93417600	NA	FAM69A-001	ENSP00000359333	family with sequence similarity 69, member A [Source:HGNC Symbol;Acc:32213]	-	CDS	overlapping	0	5.36288	6.77706	9.62809	9.89593	9.35755	7.25492	6.19242	8.45576	4.95117	5.83462	3.44189	9.15279	5.54381	5.79346	9.02922	6.26379	9.29953	6.21587	8.35291	7.1262
Chr1:93459451-93460350	1	93459451	93460350	NA	null					Not found	0	4.50039	6.01409	4.72749	6.59902	5.45943	3.21679	4.70056	5.57402	5.13174	4.14656	3.27197	3.32413	6.30677	6.3921	4.3029	3.61994	2.61583	6.01947	4.81832	6.01929
Chr1:93466201-93466950	1	93466201	93466950	NA	null					Not found	0	3.04096	4.42913	3.52586	4.05845	1.58496	4.93299	4.28553	1.81914	3.85163	4.67708	0.271968	2.73916	4.66934	4.47154	1.8004	0.619936	4.75334	2.75644	3.53822	5.1262
Chr1:93543901-93546450	1	93543901	93546450	NA	MTF2-001	ENSP00000359321	metal response element binding transcription factor 2 [Source:HGNC Symbol;Acc:29535]	+	CDS	overlapping	0	10.5268	10.7078	10.0257	9.87747	9.31515	9.98118	10.4027	9.31099	10.7325	10.5522	9.78372	9.55934	10.3713	10.4191	9.66045	9.52983	9.46883	9.93435	9.75045	10.2961
Chr1:93644851-93647250	1	93644851	93647250	NA	TMED5-001	ENSP00000359305	transmembrane emp24 protein transport domain containing 5 [Source:HGNC Symbol;Acc:24251]	-	CDS	overlapping	0	10.5065	10.5452	9.97871	9.84931	9.52748	10.0942	9.94374	9.75577	10.7202	10.2006	10.2874	9.83456	10.3775	10.168	9.94676	9.87496	9.37339	9.91429	9.49241	10.1799
Chr1:93790051-93791100	1	93790051	93791100	NA	null					Not found	0	4.84831	4.13963	7.97871	6.457	7.83289	5.57936	3.28553	6.2454	5.43659	3.78399	3.27197	8.18211	3.82135	4.24914	8.92624	2.2049	7.46383	4.95807	3.73086	5.01929
Chr1:93803551-93804750	1	93803551	93804750	NA	null					Not found	0	3.84831	4.77706	4.66336	2.92094	6.87037	4.73136	4.87049	5.06706	5.04428	4.43607	3.07932	8.29375	3.49942	4.57107	5.739	2.94186	7.94496	4.60443	3.90079	6.17683
Chr1:93810601-93813150	1	93810601	93813150	NA	DR1-001	ENSP00000359295	down-regulator of transcription 1, TBP-binding (negative cofactor 2) [Source:HGNC Symbol;Acc:3017]	+	CDS	overlapping	0	10.8754	10.9166	10.1954	10.259	9.77808	10.401	10.6014	10.2989	10.7534	10.8095	10.2649	10.383	10.5948	10.7154	10.32	10.0814	10.2423	10.4075	10.295	10.4812
Chr1:93919051-93920250	1	93919051	93920250	NA	FNBP1L-001	ENSP00000359278	formin binding protein 1-like [Source:HGNC Symbol;Acc:20851]	+	CDS	overlapping	0	3.84831	3.29163	5.24832	4.40637	2.80735	1.99439	4.94849	0.819136	4.36621	3.97664	0.271968	2.73916	4.89174	4.24914	3.8004	2.94186	1.87887	4.3414	2.73086	4.48878
Chr1:93984601-93985800	1	93984601	93985800	NA	FNBP1L-001	ENSP00000359278	formin binding protein 1-like [Source:HGNC Symbol;Acc:20851]	+	CDS	overlapping	0	5.04096	4.13963	5.01128	3.40637	3.58496	4.65736	4.70056	4.27857	5.36621	3.97664	4.35943	2.32413	5.49942	3.66418	3.21544	4.52683	3.87887	4.68244	3.90079	5.40631
Chr1:94182151-94183200	1	94182151	94183200	NA	null					Not found	0	4.94785	3.29163	4.90437	2.18398	4.45943	4.49689	4.50792	4.4041	7.58344	4.14656	4.17886	3.32413	4.95885	4.24914	4.97032	4.2049	3.10126	5.86077	3.90079	6.36324
Chr1:94202851-94205100	1	94202851	94205100	NA	null					Not found	0	5.84831	5.13963	8.75852	5.88442	7.82018	4.31632	5.60745	5.4041	6.50371	4.88353	3.97241	10.1077	5.30677	4.47154	7.77003	8.8391	8.91596	6.8439	4.97879	7.24959
Chr1:94240051-94242450	1	94240051	94242450	NA	null					Not found	0	5.89894	4.42913	6.18121	5.24287	5.39232	7.10987	5.87049	4.4041	5.95117	3.78399	3.97241	4.4396	6.70887	5.94958	7.36518	5.61994	4.93776	8.37702	5.31582	6.77828
Chr1:94244101-94246950	1	94244101	94246950	NA	null					Not found	0	6.62592	4.9697	8.12874	9.47553	8.87037	5.40943	5.94849	5.27857	6.04428	3.78399	6.38049	7.45341	5.30677	4.91211	9.72125	6.95979	4.38137	7.48979	5.25442	7.48878
Chr1:94269601-94270950	1	94269601	94270950	NA	null					Not found	0	4.62592	3.29163	6.66336	8.20635	6.62936	8.17098	4.94849	6.51958	5.56784	4.5616	6.44189	9.08346	4.66934	3.98611	8.15207	4.7074	8.86376	5.92636	5.05279	5.71117
Chr1:94278151-94280250	1	94278151	94280250	NA	null					Not found	0	6.65567	5.05716	8.33321	7.61024	7.41785	6.85237	5.94849	5.14106	7.93909	5.5002	8.35412	8.90407	7.51065	6.41907	8.44906	7.1435	7.80961	9.19273	7.01626	6.84241
Chr1:94287901-94289100	1	94287901	94289100	NA	null					Not found	0	3.36288	4.9697	6.45186	0.599017	3.32193	5.05329	5.09288	5.14106	5.56784	3.97664	5.44189	3.54652	5.6287	2.24914	4.02279	4.07937	2.29391	6.8439	3.90079	4.31885
Chr1:94293151-94294050	1	94293151	94294050	NA	null					Not found	0	4.62592	4.13963	6.39375	4.92094	3.58496	5.21679	4.87049	3.14106	6.95117	4.67708	6.33806	4.98709	5.89174	4.66418	5.38536	4.7074	4.38137	6.16243	4.73086	6.01929
Chr1:94343701-94345500	1	94343701	94345500	NA	DNTTIP2-001	ENSP00000411010	deoxynucleotidyltransferase, terminal, interacting protein 2 [Source:HGNC Symbol;Acc:24013]	-	CDS	overlapping	0	9.78242	10.0572	9.68573	9.59902	9.17991	9.71093	9.93658	9.85806	10.2707	10.0427	9.47898	9.27444	9.92568	10.0195	9.54635	9.13564	8.85615	9.63418	9.57007	10.1549
Chr1:94373851-94375950	1	94373851	94375950	NA	GCLM-001	ENSP00000359258	glutamate-cysteine ligase, modifier subunit [Source:HGNC Symbol;Acc:4312]	-	CDS	overlapping	0	8.77567	9.34474	9.45659	9.61861	9.15987	9.52317	8.72847	10.031	9.73427	8.86538	9.71698	9.37216	9.83704	9.51905	9.21544	9.91914	9.52992	9.27686	8.68506	9.47367
Chr1:94490851-94492050	1	94490851	94492050	NA	ABCA4-001	ENSP00000359245	ATP-binding cassette, sub-family A (ABC1), member 4 [Source:HGNC Symbol;Acc:34]	-	CDS	overlapping	0	5.50039	4.29163	6.63019	6.50591	5.9542	7.53871	4.28553	5.77333	7.06664	3.97664	4.91582	7.1142	8.0308	4.36462	6.48222	6.52683	8.02182	6.62433	6.58884	7.94821
Chr1:94532701-94534950	1	94532701	94534950	NA	ABCA4-001	ENSP00000359245	ATP-binding cassette, sub-family A (ABC1), member 4 [Source:HGNC Symbol;Acc:34]	-	CDS	overlapping	0	6.25041	5.21763	8.01128	9.74876	8.82018	9.62375	5.98597	8.44119	8.41932	5.5616	5.5939	9.57521	9.90669	6.75164	5.16963	8.18218	10.1796	6.80955	5.97879	8.58564
Chr1:94547101-94548150	1	94547101	94548150	NA	ABCA4-001	ENSP00000359245	ATP-binding cassette, sub-family A (ABC1), member 4 [Source:HGNC Symbol;Acc:34]	-	CDS	overlapping	0	4.50039	3.77706	6.15812	6.92095	6.64386	5.16432	4.60745	5.67712	7.34806	4.14656	3.27197	7.09672	7.06928	3.24914	5.42489	5.61994	8.74099	5.01947	4.63775	6.27305
Chr1:94626001-94627050	1	94626001	94627050	NA	ARHGAP29-004	ENSP00000449764	Rho GTPase activating protein 29 [Source:HGNC Symbol;Acc:30207]	-	CDS	overlapping	0	4.7414	3.77706	7.58763	7.24287	6.70044	6.4318	5.65476	6.49156	6.08867	5.83462	0.271968	5.13148	6.33231	5.41907	7.77768	3.2049	7.64263	7.90211	6.56375	8.91876
Chr1:94661551-94662750	1	94661551	94662750	NA	ARHGAP29-004	ENSP00000449764	Rho GTPase activating protein 29 [Source:HGNC Symbol;Acc:30207]	-	CDS	overlapping	0	2.04096	0.969701	0.203928	2.92094	3	4.31632	3.02249	0.819136	3.85163	1.97664	0.271968	6.1986	3.95885	2.24914	2.21544	4.07937	7.38137	3.24186	2.31582	2.31885
Chr1:94723951-94725750	1	94723951	94725750	NA	null					Not found	0	4.50039	4.42913	8.37885	7.69705	9.30606	8.98686	4.78803	7.2454	5.79916	4.78399	3.07932	8.64003	6.52179	5.41907	8.96027	8.58572	9.04879	4.13495	4.19029	6.60425
Chr1:94735801-94737600	1	94735801	94737600	NA	null					Not found	0	4.62592	4.55466	9.43034	8.28552	9.58684	9.28901	6.37299	7.02859	5.85163	5.88353	6.35943	8.60335	7.58688	5.57107	9.89316	9.52382	9.0421	5.07836	6.56375	7.17683
Chr1:94800901-94802100	1	94800901	94802100	NA	null					Not found	0	3.84831	3.9697	5.69578	7.5763	6.33985	5.31632	4.02249	4.27857	7.17356	0.976638	3.27197	7.81598	7.58688	3.66418	5.97032	5.07937	8.2769	4.68244	5.97879	7.22574
Chr1:94882951-94885050	1	94882951	94885050	NA	ABCD3-001	ENSP00000359233	ATP-binding cassette, sub-family D (ALD), member 3 [Source:HGNC Symbol;Acc:67]	+	CDS	overlapping	0	10.4333	10.4106	10.0081	9.72055	9.31288	9.94081	10.23	9.98404	10.443	10.343	10.2535	9.29375	10.5036	10.5422	9.70127	9.86786	9.47878	9.85025	10.2797	10.6764
Chr1:94946701-94947600	1	94946701	94947600	NA	ABCD3-001	ENSP00000359233	ATP-binding cassette, sub-family D (ALD), member 3 [Source:HGNC Symbol;Acc:67]	+	CDS	overlapping	0	4.94785	3.55466	5.15812	5.50591	2.80735	5.16432	2.70056	3.14106	5.13174	4.43607	2.5939	4.4396	5.02298	4.12361	4.97032	4.32038	4.2008	4.13495	4.53822	5.77828
Chr1:95044801-95046300	1	95044801	95046300	NA	null					Not found	0	5.94785	5.67014	6.95882	8.14591	8.79442	5.90128	6.19242	7.12292	6.59887	4.88353	7.69823	9.62181	5.99127	6.0565	7.52832	7.85834	9.556	7.40029	6.31582	7.69389
Chr1:95111401-95112600	1	95111401	95112600	NA	null					Not found	0	4.04096	3.55466	6.33321	6.29946	7.94837	3.57936	5.09288	4.72603	5.36621	2.97664	2.27197	8.09672	3.66934	4.83411	7.03562	7.38812	7.52272	4.89394	4.53822	6.07374
Chr1:95118901-95120700	1	95118901	95120700	NA	null					Not found	0	5.50039	4.55466	5.69578	6.29946	7.59246	4.40943	5.50792	3.81914	5.74472	2.97664	2.85693	8.34649	5.40631	5.61838	4.739	6.59722	7.66023	5.64396	5.73086	6.56678
Chr1:95163601-95165250	1	95163601	95165250	NA	null					Not found	0	5.62592	3.9697	4.37385	3.18398	3.45943	7.00934	4.87049	3.4041	5.95117	3.29857	3.07932	8.10549	4.30677	3.47154	4.12233	2.61994	7.66023	3.43451	3.53822	6.17683
Chr1:95178451-95180400	1	95178451	95180400	NA	null					Not found	0	5.89894	4.55466	7.27002	6.32694	8.16491	6.99439	5.94849	5.4041	5.74472	4.5616	5.88668	8.24696	5.40631	5.36462	7.22666	7.67522	6.8017	5.75644	4.97879	7.24959
Chr1:95192701-95194350	1	95192701	95194350	NA	null					Not found	0	6.12842	3.55466	7.14644	8.75889	8.60363	6.34017	5.15999	6.96888	4.74472	5.14656	9.16981	8.89398	6.08438	6.02173	8.21544	8.84875	9.08507	5.89394	4.97879	5.71117
Chr1:95238901-95240550	1	95238901	95240550	NA	null					Not found	0	5.56452	5.29163	5.33321	2.92094	5.83289	4.49689	4.94849	4.4041	6.47054	4.29857	7.23775	8.00595	5.02298	3.98611	4.91588	4.7074	8.56537	5.38871	3.73086	6.64078
Chr1:95266951-95268600	1	95266951	95268600	NA	null					Not found	0	8.76888	6.39597	8.24832	8.82302	7.40939	7.30425	5.87049	7.58732	8.43659	6.95392	8.27759	8.41159	9.02298	9.32239	7.35499	6.76968	8.82918	7.7013	8.75877	8.82664
Chr1:95319601-95321400	1	95319601	95321400	NA	SLC44A3-004	ENSP00000389143	solute carrier family 44, member 3 [Source:HGNC Symbol;Acc:28689]	+	CDS	overlapping	0	7.86114	4.13963	9.16682	9.01264	8.33539	9.01676	7.27042	8.10454	9.52809	7.85928	8.62952	8.62791	8.83927	7.24914	8.53736	8.84394	8.26545	7.46793	8.31582	8.62263
Chr1:95488951-95490000	1	95488951	95490000	NA	ALG14-001	ENSP00000359224	asparagine-linked glycosylation 14 homolog (S. cerevisiae) [Source:HGNC Symbol;Acc:28287]	-	CDS	overlapping	0	5.62592	3.77706	8.29669	8.4192	8.04985	8.44285	7.401	7.10454	7.59887	6.67708	8.20861	8.37579	7.4767	6.02173	8.58176	7.77981	8.73685	7.4789	7.2066	6.64078
Chr1:95537551-95539650	1	95537551	95539650	NA	ALG14-001	ENSP00000359224	asparagine-linked glycosylation 14 homolog (S. cerevisiae) [Source:HGNC Symbol;Acc:28287]	-	CDS	overlapping	0	9.81574	9.51273	9.18121	9.23201	8.71425	9.24232	9.66635	9.63931	10.158	9.80636	9.29156	9.4045	9.77787	9.66418	9.44185	9.01225	9.50092	9.44294	9.84721	9.95547
Chr1:95552401-95553450	1	95552401	95553450	NA	null					Not found	0	4.50039	3.77706	6.11082	7.29946	7.65821	8.17098	5.09288	5.62649	5.95117	5.22457	5.5199	7.39737	5.40631	3.98611	7.66665	6.4013	7.50336	6.07836	5.73086	6.27305
[truncated: 28,354 more rows]

## Sheet: Figure_7G
# Source_Data_Figure_7G
Probe	Feature	Chr	Start	End	P.value	FDR	Log2.Fold.Change	Shrunk.Log2.Fold.Change
[truncated: 29,738 more rows]

## Sheet: Figure_7J
# Source_Data_Figure_7J
[truncated: 46 more rows]
