# Supplementary material for: NF1 regulates mesenchymal glioblastoma plasticity and aggressiveness through the AP-1 transcription factor FOSL1
Source: eLife. 2021 Aug 17;10:e64846. doi: 10.7554/eLife.64846 (PMC8370767; doi:10.7554/eLife.64846)
Supplement: Supplementary file 1. [file elife-64846-supp1.xlsx]

## Sheet: Table_S1
# Supplementary File 1: Trasncriptional subtypes of the BTSC lines
accession_ID	Sample	dataset	Developmental_ssGSEA	Injury_ssGSEA	Classical_ssGSEA	Mesenchymal_ssGSEA	Proneural_ssGSEA	Developmental_pval_ssGSEA	Injury_pval_ssGSEA	Classical_pval_ssGSEA	Mesenchymal_pval_ssGSEA	Proneural_pval_ssGSEA	Wang_2017	Richards_2021
GSM1194851	GSC2	GSE49161	-453.417	1462.12	-327.037	2034.03	-164.563	1	0.000999001	0.989011	0.000999001	0.903097	MES	INJ
GSM1194852	GSC11	GSE49161	1787.99	-789.525	2180.64	-1763.92	-104.983	0.000999001	1	0.001998	1	0.873127	CL	DEV
GSM1194853	GSC17	GSE49161	-486.51	1310.56	165.163	934.169	318.325	1	0.000999001	0.884116	0.0859141	0.542458	MES	INJ
GSM1194854	GSC20	GSE49161	-1152.59	2304.61	-507.264	3148.91	-248.344	1	0.000999001	0.998002	0.000999001	0.931069	MES	INJ
GSM1194855	GSC23	GSE49161	1396.89	-776.387	1889.03	-2282.34	178.101	0.000999001	1	0.001998	1	0.682318	CL	DEV
GSM1194856	GSC7-2	GSE49161	742.443	-355.36	657.206	-1639.96	350.406	0.020979	1	0.516484	1	0.508492	PN	DEV
GSM1194857	GSC6-27	GSE49161	881.755	131.956	375.679	-299.661	-638.394	0.000999001	1	0.755245	0.942058	0.986014	CL	DEV
GSM1194858	GSC13	GSE49161	1814.54	-767.576	2479.32	-1198.91	326.064	0.000999001	1	0.000999001	1	0.534466	CL	DEV
GSM1194859	GSC16	GSE49161	1712.28	-779.163	991.591	-721.613	1259.93	0.000999001	1	0.232767	0.992008	0.018981	PN	DEV
GSM1194860	GSC30	GSE49161	1101.64	22.8138	2172.47	-164.122	-166.392	0.000999001	1	0.001998	0.897103	0.903097	CL	DEV
GSM1194861	GSC42	GSE49161	-350.419	1165.51	1206.57	853.363	-1316.16	1	0.000999001	0.0929071	0.124875	1	CL	INJ
GSM1194862	GSC28	GSE49161	-1968.44	2624.9	-927.898	3076.02	-1086.4	1	0.000999001	1	0.000999001	0.999001	MES	INJ
GSM1194863	GSC34	GSE49161	1899.59	-762.525	2026.26	-1094.14	1320.04	0.000999001	1	0.001998	1	0.015984	CL	DEV
GSM1194864	GSC37	GSE49161	549.913	958.807	242.058	1090.4	1216.75	0.732268	0.000999001	0.839161	0.035964	0.022977	PN	INJ
GSM1194865	GSC38	GSE49161	1465.55	-373.994	-145.335	-707.647	2892.5	0.000999001	1	0.975025	0.991009	0.000999001	PN	DEV
GSM1194866	GSC35	GSE49161	1385.64	-649.698	91.0218	-1651.56	743.228	0.000999001	1	0.916084	1	0.200799	PN	DEV
GSM1194867	GSC46	GSE49161	684.942	339.401	-732.359	494.521	1744.98	0.101898	0.986014	1	0.388611	0.002997	PN	DEV
GSM1638621	1123_Rep_1	GSE67089	-1220.06	1572.85	-2135.01	923.907	-688.809	1	0.000999001	1	0.0909091	0.988012	MES	INJ
GSM1638622	1123_Rep_2	GSE67089	-1031.3	1535.2	-1964.12	1281.67	-915.197	1	0.000999001	1	0.011988	0.998002	MES	INJ
GSM1638623	1123_Rep_3	GSE67089	-637.208	1087.09	-2660.21	486.129	-277.37	1	0.000999001	1	0.394605	0.936064	MES	INJ
GSM1638624	157_Rep_1	GSE67089	1652.17	-643.145	2550.15	-816.707	374.348	0.000999001	1	0.000999001	0.996004	0.487512	CL	DEV
GSM1638625	157_Rep_2	GSE67089	1597.9	-484.77	2313.15	-389.699	363.344	0.000999001	1	0.000999001	0.965035	0.495504	CL	DEV
GSM1638626	157_Rep_3	GSE67089	1439.94	-596.248	1403.6	-1092.16	372.897	0.000999001	1	0.034965	1	0.488511	CL	DEV
GSM1638630	528_Rep_1	GSE67089	630.704	167.196	-1075.12	95.3792	2094.01	0.317682	1	1	0.738262	0.000999001	PN	DEV
GSM1638631	528_Rep_2	GSE67089	115.671	322.555	-2307.15	-648.444	1345.02	1	0.993007	1	0.989011	0.014985	PN	INJ
GSM1638632	528_Rep_3	GSE67089	411.623	409.324	-1271.28	674.464	2034.54	0.997003	0.843157	1	0.235764	0.000999001	PN	INJ
GSM1638633	816_Rep_1	GSE67089	1575.53	-93.5378	3290.93	-61.0085	-19.9742	0.000999001	1	0.000999001	0.846154	0.818182	CL	DEV
GSM1638634	816_Rep_2	GSE67089	1731.69	-236.994	3310.53	-325.537	279.898	0.000999001	1	0.000999001	0.947053	0.575425	CL	DEV
GSM1638635	816_Rep_3	GSE67089	1701.88	-92.4828	3258.07	506.696	764.216	0.000999001	1	0.000999001	0.376623	0.18981	CL	DEV
GSM1638636	83_Rep_1	GSE67089	-961.151	1270.29	-1697.23	1134.78	-230.935	1	0.000999001	1	0.031968	0.926074	MES	INJ
GSM1638637	83_Rep_2	GSE67089	-1026.38	1352.88	-1570.86	862.325	-190.481	1	0.000999001	1	0.122877	0.912088	MES	INJ
GSM1638638	83_Rep_3	GSE67089	-913.888	1581.21	-1224.18	1270.88	252.891	1	0.000999001	1	0.012987	0.605395	MES	INJ
GSM1638639	84_Rep_1	GSE67089	1837.36	-551.362	2420.83	-495.895	744.005	0.000999001	1	0.000999001	0.975025	0.200799	CL	DEV
GSM1638640	84_Rep_2	GSE67089	1774.54	-364.15	2459.92	73.563	698.294	0.000999001	1	0.000999001	0.753247	0.236763	CL	DEV
GSM1638641	84_Rep_3	GSE67089	1794.93	-676.569	1854.27	-803.9	1229.05	0.000999001	1	0.001998	0.995005	0.022977	CL	DEV
GSM1638642	AC17_Rep_1	GSE67089	1585.05	-229.213	1416.04	136.853	146.222	0.000999001	1	0.030969	0.705295	0.698302	CL	DEV
GSM1638643	AC17_Rep_2	GSE67089	1505.59	-129.014	1589.43	132.875	186.851	0.000999001	1	0.00999001	0.712288	0.676324	CL	DEV
GSM1638644	AC17_Rep_3	GSE67089	1724.09	-298.449	2166.96	310.374	1038.96	0.000999001	1	0.001998	0.558442	0.0599401	CL	DEV
GSM1638645	AC20_Rep_1	GSE67089	1482.97	-93.0457	1293.7	114.121	-119.758	0.000999001	1	0.0569431	0.722278	0.882118	CL	DEV
GSM1638646	AC20_Rep_2	GSE67089	1917.32	-747.067	2094.93	-711.176	968.108	0.000999001	1	0.001998	0.992008	0.0909091	CL	DEV
GSM1638647	AC20_Rep_3	GSE67089	2020.97	-560.31	1615.67	212.207	1350.34	0.000999001	1	0.00899101	0.646354	0.013986	CL	DEV
GSM1638658	MD13_Rep_1	GSE67089	-888.781	1722.78	-1246.3	1445.43	411.051	1	0.000999001	1	0.002997	0.455544	MES	INJ
GSM1638659	MD13_Rep_2	GSE67089	-833.18	1677.79	-1664.63	1520.55	92.0816	1	0.000999001	1	0.000999001	0.741259	MES	INJ
GSM1638660	MD13_Rep_3	GSE67089	-582.63	1632.02	-221.808	1586.49	620.293	1	0.000999001	0.983017	0.000999001	0.285714	MES	INJ
GSM1638661	MD30_Rep_1	GSE67089	-1266.72	1823.06	-1298.18	1476.77	-393.064	1	0.000999001	1	0.001998	0.958042	MES	INJ
GSM1638662	MD30_Rep_2	GSE67089	-1227.88	1753.8	-1652.43	1403.3	-299.723	1	0.000999001	1	0.003996	0.942058	MES	INJ
GSM1638663	MD30_Rep_3	GSE67089	-1319.14	1830.89	-1640.62	1565.63	-234.434	1	0.000999001	1	0.000999001	0.927073	MES	INJ
GSM198765	GS-1	GSE8049	64.3915	1580.12	1406.17	2793.47	-545.604	1	0.000999001	0.034965	0.000999001	0.981019	MES	INJ
GSM198766	GS-2	GSE8049	303.932	766.115	1626.94	764.714	-1340.34	1	0.000999001	0.00899101	0.181818	1	CL	INJ
GSM198767	GS-3	GSE8049	2094.23	-1397.03	2950.37	-2933.03	-169.667	0.000999001	1	0.000999001	1	0.904096	CL	DEV
GSM198768	GS-4	GSE8049	-166.948	1281.62	39.52	1980.03	707.666	1	0.000999001	0.936064	0.000999001	0.226773	MES	INJ
GSM198769	GS-5	GSE8049	1563.58	-457.469	106.02	-1786.44	1660.32	0.000999001	1	0.907093	1	0.003996	PN	DEV
GSM198770	GS-6	GSE8049	-366.843	1475.4	845.165	1969.61	-545.661	1	0.000999001	0.356643	0.000999001	0.981019	MES	INJ
GSM198771	GS-7	GSE8049	-737.42	1408.72	-203.525	1496.73	138.027	1	0.000999001	0.979021	0.000999001	0.708292	MES	INJ
GSM198772	GS-8	GSE8049	1360.44	-804.713	878.222	-1961.98	1514.49	0.000999001	1	0.317682	1	0.00699301	PN	DEV
GSM198773	GS-9	GSE8049	1771.71	-1042.18	1433.37	-2076.03	2796.48	0.000999001	1	0.027972	1	0.000999001	PN	DEV
GSM198774	GS-1-2	GSE8049	49.9169	1209.41	173.3	1538.4	168.463	1	0.000999001	0.879121	0.000999001	0.686314	MES	INJ
GSM198775	GS-2-2	GSE8049	-609.116	1232.1	-1564.76	1446.9	-796.57	1	0.000999001	1	0.002997	0.995005	MES	INJ
GSM198776	GS-3-2	GSE8049	1469.42	-506.103	1549.64	-2401.78	-157.292	0.000999001	1	0.011988	1	0.898102	CL	DEV
GSM198777	GS-4-2	GSE8049	-108.812	1139.17	-100.418	1463.75	522.168	1	0.000999001	0.967033	0.002997	0.350649	MES	INJ
GSM198778	GS-5-2	GSE8049	972.437	366.146	-17.7462	-173.272	98.0585	0.000999001	0.949051	0.948052	0.9001	0.734266	PN	DEV
GSM198779	GS-7-2	GSE8049	-924.001	1729.08	-1039.31	2265.38	424.254	1	0.000999001	1	0.000999001	0.443556	MES	INJ
GSM198780	GS-8-2	GSE8049	795.269	88.0665	273.845	-556.397	12.7725	0.003996	1	0.819181	0.982018	0.802198	PN	DEV
GSM198781	GS-9-2	GSE8049	1643.37	-866.746	1441.28	-2128.95	1971.18	0.000999001	1	0.026973	1	0.000999001	PN	DEV
GSM3384803	GSC1	GSE119834	1626.5	-867.098	2005.22	-1827.72	273.283	0.000999001	1	0.001998	1	0.581419	CL	DEV
GSM3384804	GSC10	GSE119834	1255.92	-936.826	-554.544	-2094.56	2438.86	0.000999001	1	0.999001	1	0.000999001	PN	DEV
GSM3384805	GSC11	GSE119834	2117.24	-1303.8	2322.53	-2711.02	1448.62	0.000999001	1	0.000999001	1	0.00899101	CL	DEV
GSM3384806	GSC12	GSE119834	1617.73	-96.652	1254.87	22.4404	145.824	0.000999001	1	0.0729271	0.791209	0.701299	CL	DEV
GSM3384807	GSC13	GSE119834	1800.71	-680.382	2413.21	-1212.23	-478.74	0.000999001	1	0.000999001	1	0.973027	CL	DEV
GSM3384808	GSC14	GSE119834	896.714	-337.13	197.302	-662.926	457.522	0.000999001	1	0.866134	0.989011	0.413586	PN	DEV
GSM3384809	GSC15	GSE119834	365.273	224.825	219.848	-486.912	79.362	1	1	0.855145	0.975025	0.751249	PN	DEV
GSM3384810	GSC16	GSE119834	-1551.38	2256.31	350.931	1923.48	-843.224	1	0.000999001	0.77023	0.000999001	0.997003	MES	INJ
GSM3384811	GSC17	GSE119834	-1600.15	2239.99	-131.367	2309.81	-960.414	1	0.000999001	0.971029	0.000999001	0.998002	MES	INJ
GSM3384812	GSC18	GSE119834	-1606.31	2090.93	-679.943	1934.54	-642.44	1	0.000999001	1	0.000999001	0.986014	MES	INJ
GSM3384813	GSC19	GSE119834	-1466.66	2071.28	-799.222	3147.08	-741.017	1	0.000999001	1	0.000999001	0.992008	MES	INJ
GSM3384814	GSC2	GSE119834	2512.49	-1303.48	3475.11	-2771.38	266.924	0.000999001	1	0.000999001	1	0.589411	CL	DEV
GSM3384815	GSC20	GSE119834	-551.623	1838.86	1310.98	2443.58	-1397.82	1	0.000999001	0.0539461	0.000999001	1	MES	INJ
GSM3384816	GSC21	GSE119834	-564.417	1957.5	321.251	3199.39	-27.583	1	0.000999001	0.792208	0.000999001	0.821179	MES	INJ
GSM3384817	GSC22	GSE119834	-883.508	1802.61	-473.962	2610.31	-334.803	1	0.000999001	0.996004	0.000999001	0.953047	MES	INJ
GSM3384818	GSC23	GSE119834	-641.93	1387.06	-821.168	2188.06	-751.969	1	0.000999001	1	0.000999001	0.993007	MES	INJ
GSM3384819	GSC24	GSE119834	105.8	830.248	512.972	97.1318	-213.204	1	0.000999001	0.658342	0.737263	0.923077	CL	INJ
GSM3384820	GSC25	GSE119834	-163.609	1458.47	777.792	1570.78	-363.567	1	0.000999001	0.398601	0.000999001	0.955045	MES	INJ
GSM3384821	GSC26	GSE119834	923.518	182.933	1364.15	675.273	160.362	0.000999001	1	0.03996	0.233766	0.689311	CL	DEV
GSM3384822	GSC27	GSE119834	1251.87	23.4416	1728.47	-935.734	-295.672	0.000999001	1	0.004995	0.999001	0.941059	CL	DEV
GSM3384823	GSC28	GSE119834	1544.12	-245.218	2266.25	-1452.67	693.419	0.000999001	1	0.000999001	1	0.237762	CL	DEV
GSM3384824	GSC29	GSE119834	785.068	604.24	1201.53	655.689	561.935	0.003996	0.025974	0.0979021	0.255744	0.321678	CL	DEV
GSM3384825	GSC3	GSE119834	2383.86	-1252.47	1605.71	-1348.56	2113.44	0.000999001	1	0.00999001	1	0.000999001	PN	DEV
GSM3384826	GSC30	GSE119834	379.017	966.357	22.3559	1231.44	-78.6936	0.998002	0.000999001	0.941059	0.020979	0.853147	MES	INJ
GSM3384827	GSC31	GSE119834	-414.625	1434.37	-923.436	1666.89	465.27	1	0.000999001	1	0.000999001	0.408591	MES	INJ
GSM3384828	GSC32	GSE119834	1359.34	-54.9026	-1414.97	336.268	2630.86	0.000999001	1	1	0.53047	0.000999001	PN	DEV
GSM3384829	GSC33	GSE119834	52.7146	1002.09	-279.704	960.715	493.059	1	0.000999001	0.986014	0.0719281	0.37962	MES	INJ
GSM3384830	GSC34	GSE119834	1115.42	210.587	2083.58	303.208	-1132.1	0.000999001	1	0.001998	0.561439	1	CL	DEV
GSM3384831	GSC35	GSE119834	-1598.02	2565.37	-486.671	2973.6	-1017.63	1	0.000999001	0.997003	0.000999001	0.999001	MES	INJ
GSM3384832	GSC36	GSE119834	1572.4	-633.823	-595.685	-1290.06	2729.5	0.000999001	1	1	1	0.000999001	PN	DEV
GSM3384833	GSC37	GSE119834	-582.539	1380.06	453.604	1590.44	-394.176	1	0.000999001	0.712288	0.000999001	0.958042	MES	INJ
GSM3384834	GSC38	GSE119834	-7.28249	804.98	291.668	1381.81	-921.143	1	0.000999001	0.811189	0.003996	0.998002	MES	INJ
GSM3384835	GSC39	GSE119834	2104.61	-993.262	2551.28	-1534.7	46.3704	0.000999001	1	0.000999001	1	0.778222	CL	DEV
GSM3384836	GSC4	GSE119834	2682.28	-1215.3	974.518	-847.897	3515.29	0.000999001	1	0.241758	0.997003	0.000999001	PN	DEV
GSM3384837	GSC40	GSE119834	-773.345	1280.05	-1120.4	1942.36	350.677	1	0.000999001	1	0.000999001	0.508492	MES	INJ
GSM3384838	GSC41	GSE119834	-1783.11	2454.24	-503.045	2637.39	-632.362	1	0.000999001	0.998002	0.000999001	0.986014	MES	INJ
GSM3384839	GSC42	GSE119834	1063.96	-420.878	-335.454	-1274.44	522.834	0.000999001	1	0.989011	1	0.348651	PN	DEV
GSM3384840	GSC43	GSE119834	1962.05	-1205.56	2654.76	-1798.7	571.289	0.000999001	1	0.000999001	1	0.316683	CL	DEV
GSM3384841	GSC44	GSE119834	-230.624	477.688	-786.173	-284.094	1431.73	1	0.483516	1	0.937063	0.00899101	PN	INJ
GSM3384842	GSC5	GSE119834	1607.94	-713.163	1949.39	-1452.13	337.213	0.000999001	1	0.001998	1	0.528472	CL	DEV
GSM3384843	GSC6	GSE119834	1319.79	-268.621	1416.96	-979.984	406.204	0.000999001	1	0.030969	0.999001	0.461538	CL	DEV
GSM3384844	GSC7	GSE119834	2610.92	-1912.56	2847.21	-2838.44	993.911	0.000999001	1	0.000999001	1	0.0789211	CL	DEV
GSM3384845	GSC8	GSE119834	2134.3	-1111.53	3262.88	-2746.3	-470.324	0.000999001	1	0.000999001	1	0.97003	CL	DEV
GSM3384846	GSC9	GSE119834	1882.88	-1174.26	1484.16	-2420.37	659.728	0.000999001	1	0.018981	1	0.266733	CL	DEV
GSM4075051	BTSC211	Freiburg	-689.143	1606.63	-1261.23	1532.03	-208.242	1	0.000999001	1	0.000999001	0.922078	MES	INJ
GSM4075052	BTSC23	Freiburg	824.004	-363.663	251.265	-1565.24	-211.974	0.001998	1	0.836164	1	0.923077	CL	DEV
GSM4075053	BTSC66	Freiburg	1336.18	-578.66	861.081	-2062.38	-258.419	0.000999001	1	0.340659	1	0.933067	CL	DEV
GSM4075054	BTSC71	Freiburg	-350.355	762.584	-943.033	-290.535	228.718	1	0.000999001	1	0.939061	0.632368	PN	INJ
GSM4075055	BTSC217	Freiburg	641.027	-175.138	-1475.65	-551.638	509.342	0.270729	1	1	0.981019	0.364635	PN	DEV
GSM4075056	BTSC145	Freiburg	398.594	363.776	-85.4988	-220.092	-656.698	0.997003	0.957043	0.962038	0.919081	0.987013	MES	INJ
GSM4075057	BTSC161	Freiburg	116.416	499.925	-1432.63	-15.135	364.246	1	0.351648	1	0.815185	0.495504	PN	INJ
GSM4075058	BTSC205	Freiburg	-672.337	1776.76	-1164.12	3116.27	-417.363	1	0.000999001	1	0.000999001	0.961039	MES	INJ
GSM4075059	BTSC168	Freiburg	1142.25	-18.7415	1267.64	-1060.71	-538.502	0.000999001	1	0.0669331	0.999001	0.981019	CL	DEV
GSM4075060	BTSC232	Freiburg	197.72	839.604	-100.13	607.187	-708.972	1	0.000999001	0.967033	0.293706	0.99001	MES	INJ
GSM4075063	BTSC252	Freiburg	983.158	588.854	1639.14	309.754	-119.381	0.000999001	0.040959	0.00799201	0.558442	0.882118	CL	DEV
GSM4075064	BTSC268	Freiburg	1266.8	-13.9361	722.83	260.148	2345.65	0.000999001	1	0.44955	0.6004	0.000999001	PN	DEV
GSM4075065	BTSC281	Freiburg	1479.57	-445.552	1091.25	-1039.58	1987.22	0.000999001	1	0.160839	0.999001	0.000999001	PN	DEV
GSM4075066	BTSC337	Freiburg	1655.32	-948.323	1160.34	-2275.13	1491.77	0.000999001	1	0.123876	1	0.00699301	PN	DEV
GSM4075067	BTSC348	Freiburg	-737.419	1898.51	1506.29	2990.01	-551.179	1	0.000999001	0.017982	0.000999001	0.981019	MES	INJ
GSM4075068	BTSC349	Freiburg	-988.406	1884.89	-663.985	2974.9	-273.643	1	0.000999001	1	0.000999001	0.936064	MES	INJ
GSM4075069	BTSC380	Freiburg	-855.062	1996.06	1087.15	2348.73	-929.591	1	0.000999001	0.162837	0.000999001	0.998002	MES	INJ
GSM4075070	BTSC385	Freiburg	1470.02	-294.134	1851.91	-794.477	966.386	0.000999001	1	0.001998	0.995005	0.0919081	CL	DEV
GSM4075071	BTSC395	Freiburg	1539.25	-226.461	2341.01	-595.92	-601.839	0.000999001	1	0.000999001	0.985015	0.983017	CL	DEV
GSM4075072	BTSC422	Freiburg	-728.012	1463.67	-10.9359	2076.96	581.864	1	0.000999001	0.948052	0.000999001	0.308691	MES	INJ
GSM4075073	BTSC407	Freiburg	31.8311	955.421	1236.25	1098.23	1299.79	1	0.000999001	0.0799201	0.035964	0.015984	PN	INJ
GSM4075074	BTSC409	Freiburg	2179.55	-1218.55	2255.34	-1793.08	1445.64	0.000999001	1	0.000999001	1	0.00899101	CL	DEV
SRS926534	BT-189	SRP057855	-357.237	1700.59	-765.165	2833.82	1827.17	1	0.000999001	1	0.000999001	0.001998	MES	INJ
SRS926535	BT-143	SRP057855	224.174	1105.54	1411.81	1175.77	-787.919	1	0.000999001	0.033966	0.024975	0.994006	MES	INJ
SRS926536	BT-75	SRP057855	1359.69	290.025	1871.54	-2.42092	1157.79	0.000999001	1	0.001998	0.811189	0.031968	CL	DEV
SRS926537	BT-84	SRP057855	2242.46	-951.049	1432.14	-1483.55	2061.96	0.000999001	1	0.028971	1	0.000999001	PN	DEV
SRS926538	BT-50	SRP057855	1500.05	-233.007	2104.15	-1238.89	499.095	0.000999001	1	0.001998	1	0.377622	CL	DEV
SRS926539	BT-12	SRP057855	185.773	1032.79	1041	798.314	-593.176	1	0.000999001	0.1998	0.15984	0.982018	MES	INJ
SRS926540	BT-147	SRP057855	1277.3	-676.685	1073.23	-838.42	304.348	0.000999001	1	0.171828	0.996004	0.553447	CL	DEV
SRS926541	BT-67	SRP057855	875.25	146.093	204.302	-240.784	113.029	0.000999001	1	0.863137	0.925075	0.725275	PN	DEV
SRS926542	BT-89	SRP057855	957.418	17.5175	-101.905	-120.783	1504.82	0.000999001	1	0.967033	0.876124	0.00699301	PN	DEV
SRS926543	BT-206	SRP057855	-533.016	1266.72	-777.48	1175.2	1405.72	1	0.000999001	1	0.024975	0.010989	PN	INJ
SRS926544	BT-73	SRP057855	-711.902	1320.71	-472.753	1364.33	-982.212	1	0.000999001	0.996004	0.004995	0.999001	MES	INJ
SRS926545	BT-127	SRP057855	627.098	716.841	414.868	914.449	-409.595	0.33966	0.000999001	0.735265	0.0949051	0.959041	MES	INJ
SRS926546	BT-53	SRP057855	347.716	-86.1523	436.969	-718.917	-260.823	1	1	0.725275	0.992008	0.934066	CL	DEV
SRS926547	BT-48	SRP057855	1105.76	93.0985	2501.31	-477.148	-760.675	0.000999001	1	0.000999001	0.973027	0.993007	CL	DEV
