# Supplementary material for: NF1 regulates mesenchymal glioblastoma plasticity and aggressiveness through the AP-1 transcription factor FOSL1
Source: eLife. 2021 Aug 17;10:e64846. doi: 10.7554/eLife.64846 (PMC8370767; doi:10.7554/eLife.64846)
Supplement: Supplementary file 2. [file elife-64846-supp2.xlsx]

## Sheet: Table_S2
# Supplementary File 2: Genes differentially expressed in BTSCs (MES versus Non-Mes) at FDR <0.05.
Gene.Symbol	logFC	AveExpr	t	P.Value	adj.P.Val	B
C1orf61	-1.67375	0.0678619	-10.4882	4.49115e-24	2.60196e-20	43.8375
MYO1C	1.67084	-0.0258645	10.4183	8.53639e-24	2.81388e-20	43.2094
MAP2	-1.66963	0.0192199	-10.471	5.26234e-24	2.60196e-20	43.6825
OLIG2	-1.65671	-0.0022063	-10.3616	1.4327e-23	3.542e-20	42.703
CSPG5	-1.64097	0.0569827	-10.2629	3.51309e-23	6.94819e-20	41.826
SLC10A3	1.63019	-0.0312318	10.1458	1.00966e-22	1.42636e-19	40.7939
PROCR	1.62764	-0.0033433	10.1744	7.8097e-23	1.28717e-19	41.045
CAST	1.61901	0.00101517	10.0498	2.38508e-22	2.94826e-19	39.9536
MYH9	1.61333	-0.00872435	10.0157	3.23204e-22	3.5513e-19	39.6566
FOSL1	1.60782	0.0224385	9.99606	3.84768e-22	3.80497e-19	39.4861
TTYH1	-1.60276	0.0368289	-9.97565	4.61178e-22	4.14599e-19	39.3091
RNFT2	-1.60142	-0.0118672	-9.91329	8.00807e-22	4.94949e-19	38.7698
RAB27A	1.60012	-0.0455045	9.94537	6.03052e-22	4.49757e-19	39.047
CYP1B1	1.59914	0.0346399	9.91616	7.80727e-22	4.94949e-19	38.7946
MET	1.59821	-0.0360619	9.94442	6.08187e-22	4.49757e-19	39.0387
MYOF	1.59482	0.0101579	9.93923	6.36728e-22	4.49757e-19	38.9939
PHLPP1	-1.5946	0.0269233	-9.90196	8.8497e-22	5.14792e-19	38.6721
AHNAK2	1.58902	0.027481	9.82741	1.70498e-21	8.87397e-19	38.0314
MAN1A1	1.58078	-0.0103904	9.83394	1.60994e-21	8.84485e-19	38.0874
FHOD1	1.57674	-0.022555	9.78335	2.50752e-21	1.23984e-18	37.6545
CTNND2	-1.57529	0.0451118	-9.77696	2.65159e-21	1.24865e-18	37.5999
PLAUR	1.56661	0.0341194	9.69305	5.50632e-21	2.4174e-18	36.886
TRIM24	-1.56614	0.0146054	-9.68575	5.86689e-21	2.4174e-18	36.824
GFPT2	1.56532	0.0227673	9.67639	6.36266e-21	2.51682e-18	36.7448
CHD7	-1.56477	0.0197906	-9.66424	7.06913e-21	2.68872e-18	36.6419
AHNAK	1.56096	0.0166093	9.68822	5.74214e-21	2.4174e-18	36.845
BCAN	-1.55282	0.0111594	-9.65576	7.60763e-21	2.78637e-18	36.5702
NLGN3	-1.55076	0.0310348	-9.6337	9.20669e-21	3.2516e-18	36.3839
TPBG	1.5499	0.0350537	9.5685	1.6149e-20	5.32324e-18	35.835
ABAT	-1.54904	-0.00862305	-9.59057	1.33562e-20	4.55446e-18	36.0205
SOX11	-1.53319	0.0662923	-9.5348	2.15678e-20	6.88014e-18	35.5524
MARCKSL1	-1.52061	0.019862	-9.37839	8.17638e-20	2.45019e-17	34.2512
BNC2	1.51745	0.015799	9.35506	9.95995e-20	2.89688e-17	34.0585
P4HA2	1.51694	-0.0388817	9.40109	6.74541e-20	2.08454e-17	34.439
PTGER4	1.50974	0.0102815	9.27563	1.94451e-19	5.34146e-17	33.4055
TCIRG1	1.50585	-0.0153545	9.30356	1.5376e-19	4.34439e-17	33.6346
HPCAL1	1.49728	-0.000806431	9.19993	3.66369e-19	9.79195e-17	32.7872
PTGS2	1.48438	0.0158316	9.1089	7.80675e-19	1.93002e-16	32.0489
LMNA	1.48123	0.000959469	9.13342	6.37109e-19	1.65799e-16	32.2472
TUBB2B	-1.47855	0.0154475	-9.11899	7.18077e-19	1.82079e-16	32.1305
TRIM38	1.47642	-0.0147438	9.05347	1.23395e-18	2.7733e-16	31.6022
SDC4	1.47506	0.0147386	9.06105	1.15915e-18	2.66578e-16	31.6632
GPM6A	-1.47263	0.0271809	-9.07989	9.92289e-19	2.39335e-16	31.8149
GLT8D2	1.46877	0.0242784	9.01603	1.67893e-18	3.60935e-16	31.3018
PGAP1	-1.46613	0.044515	-8.99706	1.96173e-18	4.05204e-16	31.1499
IL1R1	1.46596	-0.00205186	9.07687	1.01731e-18	2.39529e-16	31.7906
IER3	1.46451	0.0308261	8.98822	2.10922e-18	4.17161e-16	31.0792
PLP2	1.46383	-0.0331537	9.01603	1.67894e-18	3.60935e-16	31.3018
DCBLD2	1.46167	-0.0172649	8.99675	1.96681e-18	4.05204e-16	31.1474
ASCL1	-1.46043	0.0557921	-8.99229	2.04009e-18	4.11724e-16	31.1117
LRRC8E	1.45884	0.0203637	8.93552	3.24489e-18	6.29191e-16	30.659
PERP	1.45187	0.0321579	8.92885	3.4262e-18	6.51572e-16	30.606
MAP3K1	-1.451	0.0359675	-8.89425	4.54069e-18	8.16416e-16	30.3313
FHL2	1.45017	0.0103559	8.91144	3.94835e-18	7.25144e-16	30.4677
SMAGP	1.44555	0.0211548	8.91109	3.95973e-18	7.25144e-16	30.4649
APBA2	-1.44399	0.0146439	-8.85131	6.43257e-18	1.0602e-15	29.9917
CDK5R1	-1.44337	0.0375225	-8.83189	7.52661e-18	1.16298e-15	29.8385
CD44	1.44286	0.0313624	8.89194	4.62662e-18	8.17011e-16	30.313
SALL2	-1.44255	0.0180558	-8.8444	6.80254e-18	1.06778e-15	29.9371
ANXA2	1.4418	-0.0112337	8.85832	6.07739e-18	1.01863e-15	30.0471
ARPC1B	1.44057	-0.00324897	8.86379	5.81424e-18	9.91328e-16	30.0902
FAM114A1	1.4399	-0.0309848	8.84715	6.65293e-18	1.06114e-15	29.9588
TGFBR2	1.43752	0.00505769	8.8482	6.59635e-18	1.06114e-15	29.9671
FEZ1	-1.43431	0.0441594	-8.87063	5.5003e-18	9.54253e-16	30.1444
MVP	1.43427	0.01535	8.7991	9.8068e-18	1.44745e-15	29.5804
MAFF	1.43359	0.0225159	8.75979	1.34539e-17	1.9282e-15	29.2722
SERPINE1	1.4335	0.0356236	8.7863	1.0872e-17	1.58107e-15	29.4799
BAALC	-1.42972	0.0566908	-8.81649	8.52361e-18	1.29677e-15	29.7172
APC2	-1.42702	0.0850903	-8.81342	8.73737e-18	1.30915e-15	29.693
ABL2	1.42522	0.0253445	8.71616	1.90861e-17	2.62143e-15	28.9312
SHC3	-1.42288	0.0128129	-8.72058	1.8423e-17	2.56598e-15	28.9657
PODXL2	-1.42287	-0.00540191	-8.73492	1.64244e-17	2.32029e-15	29.0777
ZNF428	-1.42022	0.017289	-8.68078	2.53177e-17	3.29429e-15	28.6558
NOVA1	-1.41808	0.0249269	-8.69758	2.2142e-17	2.95895e-15	28.7865
MAPT	-1.41552	0.00851439	-8.68107	2.52589e-17	3.29429e-15	28.6581
CAV1	1.41435	0.0122748	8.706	2.07008e-17	2.80425e-15	28.8521
MICAL2	1.4126	0.000355728	8.63731	3.57795e-17	4.53619e-15	28.3187
MYLK	1.40639	-0.0499273	8.64825	3.28024e-17	4.21277e-15	28.4033
GCLM	1.40349	-0.0133394	8.57171	6.0147e-17	7.34314e-15	27.8125
GRIA2	-1.40309	0.064821	-8.62254	4.02287e-17	5.03572e-15	28.2044
FLII	1.40307	0.00199372	8.56182	6.50252e-17	7.79386e-15	27.7365
GCNT1	1.40164	0.0064051	8.53468	8.0525e-17	9.04899e-15	27.5281
TRAF4	-1.39924	0.00980289	-8.56107	6.54151e-17	7.79386e-15	27.7306
GSDMD	1.39835	0.0068134	8.54992	7.14219e-17	8.21269e-15	27.645
ZNF219	-1.39734	-0.0140713	-8.52598	8.62277e-17	9.47451e-15	27.4615
TGM2	1.39634	0.0118984	8.53117	8.27771e-17	9.19756e-15	27.5013
LDLRAP1	1.39481	-0.0427949	8.55303	6.96954e-17	8.10845e-15	27.6689
NCAN	-1.39454	0.0598049	-8.55436	6.89645e-17	8.10845e-15	27.6792
EDEM1	1.39342	-0.0191452	8.51382	9.48678e-17	9.9803e-15	27.3684
SP100	1.39329	-0.0117411	8.49932	1.06304e-16	1.10657e-14	27.2575
VCL	1.39294	-0.0330046	8.53533	8.01161e-17	9.04899e-15	27.5331
CBX7	1.39284	0.0128265	8.49411	1.1073e-16	1.13977e-14	27.2178
RASSF2	-1.38999	0.0501024	-8.52325	8.80998e-17	9.57384e-15	27.4405
COL6A2	1.38975	0.05103	8.51978	9.05351e-17	9.69952e-15	27.414
PTPRZ1	-1.38954	-0.0032474	-8.48187	1.21874e-16	1.21739e-14	27.1244
PIK3CD	1.38942	-0.0131992	8.51882	9.12181e-17	9.69952e-15	27.4066
CYB5R2	1.38676	-0.0217983	8.46263	1.41664e-16	1.40091e-14	26.9778
RIN2	1.38459	-0.034243	8.49289	1.11799e-16	1.13977e-14	27.2084
KCNJ10	-1.38335	-0.0138406	-8.4872	1.16896e-16	1.17957e-14	27.165
MARK1	-1.38328	0.0822674	-8.58587	5.37793e-17	6.64779e-15	27.9215
TPM2	1.37928	0.00083388	8.45444	1.51019e-16	1.46415e-14	26.9155
CAV2	1.37706	-0.0209535	8.42014	1.97315e-16	1.89441e-14	26.655
ZNF195	-1.37411	0.0239039	-8.38585	2.57552e-16	2.42565e-14	26.3955
ELF4	1.37355	0.0252989	8.46087	1.43628e-16	1.40627e-14	26.9644
GEM	1.36668	0.034128	8.36043	3.13607e-16	2.92571e-14	26.2037
SPATA6	-1.3664	0.0239264	-8.34419	3.55565e-16	3.19653e-14	26.0814
GAS1	-1.36629	0.0366449	-8.35876	3.17688e-16	2.93609e-14	26.1911
ZFP30	-1.36473	0.0393907	-8.3255	4.10771e-16	3.65956e-14	25.9408
BRSK2	-1.36421	-0.00746552	-8.35408	3.29397e-16	3.01611e-14	26.1559
B3GAT1	-1.36386	-0.00301263	-8.34659	3.49052e-16	3.16676e-14	26.0994
VDR	1.36365	-0.0347375	8.39613	2.37806e-16	2.26121e-14	26.4732
TRIM9	-1.36185	0.0314649	-8.29414	5.22973e-16	4.57671e-14	25.7057
MDFIC	1.36166	-0.00415426	8.31419	4.48176e-16	3.95716e-14	25.856
SCPEP1	1.36077	-0.031937	8.27535	6.0418e-16	5.15064e-14	25.5651
AXL	1.35621	0.000112335	8.2757	6.0258e-16	5.15064e-14	25.5677
ANXA11	1.35613	-0.0484768	8.26573	6.50459e-16	5.36032e-14	25.4933
IQGAP1	1.35558	-0.000398486	8.28966	5.41286e-16	4.69542e-14	25.6722
LARP6	1.35554	-0.0359583	8.26675	6.45375e-16	5.36032e-14	25.5009
PAFAH1B3	-1.35455	0.0342057	-8.24172	7.81784e-16	6.33693e-14	25.3142
VASH1	-1.35257	0.0145968	-8.26914	6.33659e-16	5.35577e-14	25.5188
CASP4	1.35217	-0.0311458	8.26614	6.48399e-16	5.36032e-14	25.4964
ID4	-1.35101	0.0548379	-8.26363	6.61033e-16	5.40244e-14	25.4776
IGFBP6	1.35101	0.0554898	8.22924	8.60017e-16	6.9144e-14	25.2214
CEBPB	1.34935	-0.0140011	8.22678	8.76392e-16	6.98922e-14	25.203
IRF1	1.3486	0.0143746	8.20059	1.07021e-15	8.07884e-14	25.0085
ELAVL3	-1.34749	0.0560588	-8.22142	9.12983e-16	7.22279e-14	25.1632
CCND2	-1.34644	0.0535286	-8.22013	9.22025e-16	7.23643e-14	25.1536
BCAR3	1.34641	0.0109926	8.2174	9.41426e-16	7.33052e-14	25.1333
ANPEP	1.34549	0.0348003	8.17211	1.32919e-15	9.59439e-14	24.7976
IPO9	-1.34459	0.0134777	-8.17992	1.25251e-15	9.10737e-14	24.8554
S100A11	1.34432	-0.00315665	8.19362	1.12852e-15	8.45449e-14	24.9569
TMEM206	-1.3438	-0.00276358	-8.18959	1.1637e-15	8.61218e-14	24.927
TCF4	-1.34376	0.0426638	-8.21489	9.59664e-16	7.41415e-14	25.1146
ZNF254	-1.34344	0.0289084	-8.16388	1.41492e-15	1.00894e-13	24.7367
SHC1	1.34194	-0.0349882	8.20578	1.02871e-15	7.8481e-14	25.047
CEP68	-1.34131	0.0478408	-8.18144	1.23813e-15	9.06952e-14	24.8666
HTATIP2	1.33933	0.0088081	8.2054	1.0317e-15	7.8481e-14	25.0442
GBE1	1.3384	-0.0325	8.18922	1.16699e-15	8.61218e-14	24.9242
ARNT2	-1.33689	0.00346402	-8.12727	1.86734e-15	1.25884e-13	24.4667
WIPI1	1.33662	-0.0588002	8.16357	1.41817e-15	1.00894e-13	24.7345
CELSR2	-1.33646	-0.00730305	-8.15619	1.49989e-15	1.05946e-13	24.68
PLXNB1	-1.33565	0.0135567	-8.1441	1.64393e-15	1.14485e-13	24.5907
ARC	-1.33553	0.0401944	-8.10907	2.14259e-15	1.42923e-13	24.3329
ADORA2B	1.33545	-0.00031265	8.13046	1.82277e-15	1.24313e-13	24.4902
TCF12	-1.33483	0.0116255	-8.09098	2.45588e-15	1.58733e-13	24.2001
DNASE1L1	1.33362	-0.0212032	8.09511	2.38074e-15	1.54889e-13	24.2303
HEXB	1.33343	-0.0240799	8.10752	2.1679e-15	1.42923e-13	24.3214
KIF1B	-1.33321	0.0359373	-8.1407	1.68677e-15	1.16647e-13	24.5657
CLEC2B	1.33191	0.00554174	8.13281	1.79064e-15	1.22969e-13	24.5075
ZNF682	-1.33176	0.0204983	-8.12699	1.87127e-15	1.25884e-13	24.4646
AMIGO2	1.33163	0.00221363	8.09788	2.33139e-15	1.52683e-13	24.2507
MOCOS	1.33131	-0.00145758	8.14772	1.59943e-15	1.12176e-13	24.6174
ECE1	1.33036	0.0166366	8.076	2.74928e-15	1.7317e-13	24.0902
GPR19	-1.32879	0.0132944	-8.05665	3.17979e-15	1.92914e-13	23.9487
REXO2	1.3286	-0.00939375	8.08518	2.56566e-15	1.64752e-13	24.1575
VEGFC	1.32808	0.0183602	8.07094	2.85595e-15	1.7875e-13	24.0532
GLRX	1.32794	0.028104	8.07879	2.69217e-15	1.7066e-13	24.1107
UBE2Z	1.32538	-0.00456054	8.0503	3.33502e-15	2.01098e-13	23.9023
ELL2	1.32533	0.0157148	8.06199	3.0548e-15	1.87633e-13	23.9877
CHST15	1.32482	0.00314492	8.05976	3.10649e-15	1.8963e-13	23.9714
CKB	-1.32468	-0.00105153	-8.0466	3.42906e-15	2.05515e-13	23.8753
DBI	-1.32334	0.0383449	-8.06938	2.88973e-15	1.79727e-13	24.0418
CYBRD1	1.32163	-0.00221104	8.03348	3.7836e-15	2.24048e-13	23.7795
OPTN	1.32153	-0.0462575	8.04266	3.53184e-15	2.104e-13	23.8465
ZNF84	-1.32084	0.0279079	-8.02278	4.09924e-15	2.39866e-13	23.7016
ACOT9	1.31931	-0.0549898	8.06402	3.00841e-15	1.85939e-13	24.0026
SEC61A2	-1.31859	0.0326422	-8.01691	4.28343e-15	2.47713e-13	23.6588
ATP9B	-1.31858	0.00783864	-7.99174	5.16958e-15	2.92126e-13	23.4759
IL13RA1	1.3185	0.0257204	8.10792	2.16131e-15	1.42923e-13	24.3244
MCF2L	-1.31803	0.0205872	-8.00595	4.64923e-15	2.67304e-13	23.5791
TAPBP	1.31702	-0.0231748	8.01742	4.26695e-15	2.47713e-13	23.6626
PATZ1	-1.31496	-0.0030908	-8.00362	4.73073e-15	2.70417e-13	23.5622
FLNA	1.3141	-0.00152828	8.03189	3.82902e-15	2.25388e-13	23.7679
RRAS	1.31168	0.0135317	7.97624	5.80307e-15	3.22397e-13	23.3634
PNMA2	-1.31094	0.054365	-8.08141	2.63963e-15	1.68409e-13	24.1299
OSTF1	1.3105	-0.0509419	7.98751	5.33538e-15	2.99782e-13	23.4452
POU3F3	-1.30834	0.0380617	-7.99624	4.99908e-15	2.84115e-13	23.5085
RAPGEF4	-1.30823	0.0201949	-7.94265	7.45003e-15	4.11583e-13	23.1204
PHACTR2	1.30456	-0.0394275	7.98242	5.54179e-15	3.0962e-13	23.4083
PPIC	1.3021	-0.0191057	7.91247	9.31806e-15	5.09096e-13	22.9028
SNTG1	-1.30005	0.051426	-7.92329	8.60077e-15	4.72517e-13	22.9807
OPLAH	1.29885	0.0209664	7.88605	1.13278e-14	6.12137e-13	22.7129
ESYT1	1.29674	-0.0349339	7.87936	1.19016e-14	6.39646e-13	22.6648
TBC1D8	1.29605	0.0201166	7.85427	1.4318e-14	7.37452e-13	22.4851
FSTL1	1.29521	0.00833833	7.89497	1.06062e-14	5.7629e-13	22.7769
CTBS	1.2948	3.25513e-05	7.85821	1.3909e-14	7.27757e-13	22.5133
EHBP1L1	1.2946	-0.0173842	7.87623	1.21792e-14	6.5103e-13	22.6424
THYN1	-1.29393	0.00505042	-7.8401	1.58901e-14	7.97652e-13	22.3838
PLEKHF1	1.29315	-0.00926256	7.83549	1.64373e-14	8.20953e-13	22.3509
STK3	1.29276	0.000302987	7.8649	1.32398e-14	6.96427e-13	22.5612
MICB	1.29227	-0.0150158	7.85532	1.42076e-14	7.35595e-13	22.4926
NT5E	1.29117	0.0416533	7.87289	1.24827e-14	6.63663e-13	22.6185
PPM1D	-1.29105	0.0061745	-7.86645	1.30895e-14	6.92203e-13	22.5723
CADM4	-1.2895	0.030103	-7.81514	1.90843e-14	9.3893e-13	22.2057
TUBB2A	-1.28839	0.016134	-7.84416	1.54225e-14	7.79989e-13	22.4128
ACSBG1	-1.28833	0.0270523	-7.812	1.95276e-14	9.5598e-13	22.1834
RAP1GAP	-1.28783	-0.00448485	-7.84685	1.51208e-14	7.7077e-13	22.4321
CUL7	1.28778	-0.0367352	7.8297	1.71507e-14	8.52277e-13	22.3096
PLEKHA5	1.28752	-0.0326034	7.80426	2.06673e-14	1.00679e-12	22.1282
GPRC5A	1.28745	0.0153289	7.79426	2.22346e-14	1.07258e-12	22.0572
GNG7	-1.28624	0.0221813	-7.8276	1.74176e-14	8.61213e-13	22.2946
FAM131B	-1.28589	0.0439423	-7.84384	1.54594e-14	7.79989e-13	22.4105
RELB	1.28544	0.0284569	7.78884	2.31336e-14	1.10516e-12	22.0187
ACTN1	1.28417	-0.0154743	7.77005	2.65363e-14	1.25237e-12	21.8853
ITPR3	1.28286	-0.0628912	7.84813	1.49795e-14	7.67527e-13	22.4412
SARM1	-1.28076	0.0830713	-7.85584	1.41534e-14	7.35595e-13	22.4963
TSPAN1	1.27895	-0.0095585	7.76057	2.84349e-14	1.33267e-12	21.8181
TMED9	1.27745	-0.0284866	7.74598	3.16207e-14	1.46806e-12	21.7149
FURIN	1.27739	0.0228715	7.73586	3.40363e-14	1.57283e-12	21.6433
ZBTB38	1.27639	-0.00212981	7.79639	2.18918e-14	1.06121e-12	22.0723
MLPH	1.27583	0.0241555	7.7065	4.21159e-14	1.91928e-12	21.4363
SSH3	1.27574	0.0386664	7.76974	2.65949e-14	1.25237e-12	21.8831
ANP32A	-1.27514	-0.0360157	-7.7733	2.59141e-14	1.23204e-12	21.9083
CD2AP	1.2739	-0.0869573	7.78976	2.29788e-14	1.10309e-12	22.0252
POPDC3	1.27191	0.010871	7.69393	4.61279e-14	2.09247e-12	21.3479
ANXA4	1.27107	0.0259333	7.72948	3.56502e-14	1.63974e-12	21.5983
SMARCD3	-1.27015	0.0478191	-7.70935	4.12559e-14	1.88879e-12	21.4564
BIRC3	1.26897	0.0161829	7.66478	5.69418e-14	2.51383e-12	21.1432
IL15	1.26872	0.0187271	7.67614	5.24583e-14	2.32628e-12	21.2229
SYT17	-1.26825	0.0667705	-7.75389	2.98508e-14	1.39243e-12	21.7709
HIP1	-1.26615	0.0181473	-7.64668	6.4872e-14	2.8512e-12	21.0165
LGALS8	1.26503	-0.0143227	7.67671	5.22424e-14	2.32628e-12	21.2269
APOL1	1.26068	0.0224929	7.61713	8.02262e-14	3.41964e-12	20.8102
MLC1	-1.26014	0.0527584	-7.67968	5.11345e-14	2.29849e-12	21.2478
PARP12	1.25952	-0.029601	7.64406	6.61096e-14	2.89273e-12	20.9982
CRMP1	-1.25835	0.0489632	-7.67781	5.18284e-14	2.31915e-12	21.2347
SQSTM1	1.25829	-0.0220036	7.63138	7.24207e-14	3.14109e-12	20.9096
ZNF493	-1.25785	0.0289817	-7.61421	8.19225e-14	3.4621e-12	20.7898
BFSP1	1.25725	-0.00991376	7.61795	7.97541e-14	3.41424e-12	20.8159
PCF11	-1.25708	0.0173268	-7.60217	8.93063e-14	3.75808e-12	20.706
GAB1	-1.25708	0.00196401	-7.59644	9.30473e-14	3.86616e-12	20.6661
PIK3C2B	-1.25676	0.00727633	-7.60015	9.06069e-14	3.79666e-12	20.6919
LEPROTL1	-1.25654	0.0164904	-7.62008	7.85455e-14	3.37712e-12	20.8307
SNX4	-1.25599	-0.0290284	-7.58756	9.9151e-14	4.0368e-12	20.6044
NTRK3	-1.25567	0.0884337	-7.68479	4.92793e-14	2.22522e-12	21.2837
ENOPH1	-1.2555	-0.00685172	-7.5858	1.00412e-13	4.06959e-12	20.5921
CITED1	-1.25512	0.0348916	-7.58986	9.75383e-14	4.00231e-12	20.6203
CALCOCO2	1.25461	0.0338203	7.59772	9.21968e-14	3.84698e-12	20.6751
PTN	-1.25395	0.013194	-7.58092	1.03975e-13	4.19675e-12	20.5583
LTBP2	1.25286	-0.00125314	7.63782	6.9145e-14	3.01222e-12	20.9546
BCL7A	-1.25242	-0.00566097	-7.5875	9.91954e-14	4.0368e-12	20.604
FLRT3	-1.25194	0.0456261	-7.61507	8.14152e-14	3.45543e-12	20.7959
MID2	1.25069	-0.0111256	7.59526	9.38393e-14	3.88275e-12	20.6579
STEAP1	1.25069	-0.0255458	7.62104	7.80022e-14	3.3684e-12	20.8375
PSRC1	-1.24995	0.0308877	-7.57595	1.07736e-13	4.3309e-12	20.5238
STX11	1.24907	0.0138139	7.56587	1.15775e-13	4.63524e-12	20.4538
CLIP4	1.24891	-0.0353199	7.55299	1.26907e-13	5.06041e-12	20.3647
LIF	1.24517	0.0252165	7.51968	1.60839e-13	6.23742e-12	20.1346
IDH1	-1.24471	0.0213928	-7.53225	1.47094e-13	5.74945e-12	20.2213
PHF11	1.24455	-0.000517665	7.54238	1.36874e-13	5.39262e-12	20.2913
SOX12	-1.24426	-0.0166406	-7.54275	1.36506e-13	5.39262e-12	20.2939
ITGA3	1.24412	0.0257616	7.54668	1.3274e-13	5.27173e-12	20.321
MCFD2	1.24394	-0.0350144	7.52987	1.49612e-13	5.82484e-12	20.2048
TMOD3	1.24342	-0.0120864	7.50849	1.74134e-13	6.62312e-12	20.0574
PTHLH	1.24279	0.0310227	7.5087	1.73875e-13	6.62312e-12	20.0589
C1orf21	-1.24164	0.0146302	-7.5344	1.44863e-13	5.68473e-12	20.2362
ACVR1	1.24151	-0.0309725	7.50267	1.81469e-13	6.8494e-12	20.0174
PPCS	1.2406	-0.0115712	7.50974	1.72594e-13	6.61542e-12	20.0661
TUBA1A	-1.24055	0.0177029	-7.5161	1.64983e-13	6.34832e-12	20.1099
CSNK1D	1.24018	0.0120529	7.4908	1.97387e-13	7.28343e-12	19.9357
BSN	-1.23859	0.0514712	-7.49127	1.96726e-13	7.28343e-12	19.939
PDE4B	-1.23827	0.0382769	-7.48481	2.05924e-13	7.51433e-12	19.8946
KLHL25	-1.23745	0.0421955	-7.49191	1.95841e-13	7.28071e-12	19.9434
DPF1	-1.23732	0.045553	-7.49619	1.89988e-13	7.12838e-12	19.9728
GPRC5B	-1.23553	-0.0158272	-7.49596	1.90302e-13	7.12838e-12	19.9712
CAPN2	1.23538	0.0322324	7.50371	1.80133e-13	6.82503e-12	20.0246
GLDC	-1.23463	0.0176054	-7.49224	1.95375e-13	7.28071e-12	19.9457
NFKB2	1.23374	-0.0416955	7.47011	2.28474e-13	8.24592e-12	19.7937
SYT11	-1.23279	0.0140092	-7.51849	1.622e-13	6.26559e-12	20.1264
RFX4	-1.2322	0.0521018	-7.48634	2.03706e-13	7.46091e-12	19.9051
ABLIM3	1.23194	-0.00100361	7.43474	2.93155e-13	1.03536e-11	19.5517
TWIST1	1.23181	0.0287417	7.47038	2.28032e-13	8.24592e-12	19.7956
STMN3	-1.23108	0.106763	-7.59438	9.44286e-14	3.89085e-12	20.6518
CIB1	1.22999	-0.0098686	7.46278	2.40602e-13	8.65204e-12	19.7435
TCF3	-1.22968	0.0521645	-7.45283	2.58099e-13	9.24762e-12	19.6754
SMARCA4	-1.22967	0.0286201	-7.43277	2.97234e-13	1.04603e-11	19.5383
ATP1B2	-1.22944	0.0275323	-7.44492	2.72886e-13	9.70709e-12	19.6213
PAWR	1.22903	-0.0334863	7.48802	2.01296e-13	7.40006e-12	19.9167
QKI	-1.2271	-0.00801305	-7.4157	3.35112e-13	1.16278e-11	19.4219
CD55	1.22706	-0.0245383	7.47082	2.27325e-13	8.24592e-12	19.7986
MGAT4B	1.22695	-0.0558546	7.42959	3.0397e-13	1.06218e-11	19.5165
NCALD	-1.22605	0.0547128	-7.45165	2.60243e-13	9.29075e-12	19.6673
POU3F2	-1.22587	-0.00405646	-7.44267	2.77247e-13	9.82688e-12	19.6059
IL6	1.22567	0.0103002	7.38251	4.22825e-13	1.42707e-11	19.1962
AOX1	1.22354	0.0387713	7.3749	4.45936e-13	1.49995e-11	19.1446
MOXD1	1.22337	0.00347107	7.43168	2.99517e-13	1.05033e-11	19.5309
BST1	1.22231	0.0198703	7.3848	4.16121e-13	1.40925e-11	19.2117
NMI	1.22159	0.0169241	7.36913	4.64281e-13	1.54589e-11	19.1054
CNN2	1.22134	-0.0160462	7.38612	4.12301e-13	1.40112e-11	19.2207
DRAP1	1.22075	0.0365945	7.41622	3.339e-13	1.16265e-11	19.4254
PHLDA2	1.22043	0.0393292	7.38953	4.02578e-13	1.37279e-11	19.2438
ELOVL2	-1.21985	-0.00579522	-7.40843	3.52651e-13	1.21936e-11	19.3724
TNFAIP2	1.21896	0.00765356	7.39248	3.94353e-13	1.3494e-11	19.2639
TFAP2C	1.21726	0.0130946	7.37292	4.52166e-13	1.51575e-11	19.1311
CLASP2	-1.21714	-0.00227506	-7.35645	5.07237e-13	1.67202e-11	19.0196
HOMER1	-1.21683	0.0463314	-7.36994	4.61665e-13	1.54237e-11	19.1109
MAP3K5	1.21559	-0.0558251	7.39273	3.93665e-13	1.3494e-11	19.2656
EFR3A	1.21477	0.0170656	7.36756	4.69408e-13	1.55771e-11	19.0948
NKAIN1	-1.21446	0.0382759	-7.3268	6.23495e-13	2.00821e-11	18.8193
ANXA2P2	1.21429	0.0122508	7.35451	5.14137e-13	1.68914e-11	19.0064
CFH	1.21426	-0.018242	7.39377	3.90809e-13	1.34659e-11	19.2726
AGAP1	-1.21246	-0.00218532	-7.31461	6.78585e-13	2.16469e-11	18.7372
ADNP2	-1.21174	-0.0115713	-7.32635	6.2547e-13	2.00821e-11	18.8162
LRP10	1.21147	0.00144238	7.33009	6.0942e-13	1.96946e-11	18.8415
VEZF1	-1.21121	0.0408357	-7.31965	6.55228e-13	2.09694e-11	18.7711
SHC2	-1.21016	0.0561387	-7.35217	5.22592e-13	1.71123e-11	18.9906
EPS8	1.20953	-0.0348122	7.341	5.64861e-13	1.83145e-11	18.9151
SEMA6A	-1.2095	0.0195538	-7.34384	5.53823e-13	1.80751e-11	18.9343
SERPINB1	1.20926	-0.00689027	7.36652	4.72824e-13	1.5638e-11	19.0877
CYFIP2	-1.20834	0.0630177	-7.34249	5.59057e-13	1.81859e-11	18.9252
ZNF273	-1.20749	0.0511584	-7.30292	7.35898e-13	2.32953e-11	18.6585
CIRBP	-1.20671	0.0574579	-7.30903	7.05339e-13	2.2428e-11	18.6996
CDS1	1.20664	0.0137581	7.26103	9.83062e-13	3.0191e-11	18.3776
ALKBH4	-1.20652	-0.0141491	-7.27518	8.91583e-13	2.76391e-11	18.4723
IL4R	1.20597	-0.0153418	7.30264	7.37328e-13	2.32953e-11	18.6566
NPAS3	-1.20583	0.0218791	-7.28531	8.31277e-13	2.59322e-11	18.5402
CDKN1B	-1.20533	-0.0403707	-7.26878	9.31882e-13	2.87084e-11	18.4294
NDEL1	1.2049	-0.0108933	7.28696	8.2187e-13	2.57199e-11	18.5513
KCNA2	-1.2047	-0.00543664	-7.25967	9.92377e-13	3.02889e-11	18.3684
CREG1	1.20344	-0.0440993	7.28939	8.0818e-13	2.53717e-11	18.5676
RHBDF2	1.20215	-0.0245637	7.27124	9.16218e-13	2.8314e-11	18.4459
DOCK5	1.20099	-0.00604459	7.29099	7.99243e-13	2.51711e-11	18.5784
KIF5C	-1.2007	0.0311182	-7.27989	8.63028e-13	2.6838e-11	18.5039
ZNF606	-1.2005	0.0388094	-7.26056	9.86254e-13	3.01952e-11	18.3744
BLVRB	1.19714	-0.00160572	7.2058	1.43712e-12	4.29355e-11	18.0093
CTSZ	1.19667	0.0161043	7.22927	1.22334e-12	3.68829e-11	18.1655
COL18A1	1.19627	0.019902	7.21996	1.30414e-12	3.90808e-11	18.1034
SH2D4A	1.19584	-0.0130348	7.2271	1.24176e-12	3.73245e-11	18.151
ARHGAP29	1.19571	0.0271648	7.23903	1.14396e-12	3.47012e-11	18.2305
CDCP1	1.19408	0.00204789	7.23439	1.18108e-12	3.57178e-11	18.1996
MME	1.19257	0.0181333	7.16433	1.90832e-12	5.51795e-11	17.7343
PRICKLE3	1.19074	-0.0405767	7.20353	1.45974e-12	4.34801e-11	17.9941
BAG3	1.18828	-0.0427256	7.19455	1.55223e-12	4.59581e-11	17.9345
ANXA1	1.18825	0.0613205	7.24086	1.12965e-12	3.43726e-11	18.2427
ELAVL4	-1.18792	0.0580939	-7.16569	1.89066e-12	5.4829e-11	17.7433
ZNF85	-1.18744	0.0201398	-7.1553	2.0294e-12	5.80023e-11	17.6746
NQO2	1.18726	0.0121827	7.14437	2.18632e-12	6.15968e-11	17.6024
SLC9A7	1.18672	-0.0345799	7.19676	1.529e-12	4.54062e-11	17.9492
PMP2	-1.18592	0.0231972	-7.16286	1.9275e-12	5.55715e-11	17.7246
STC1	1.18579	0.0299066	7.16794	1.86187e-12	5.43126e-11	17.7582
BCHE	-1.18556	-0.0119194	-7.16722	1.87104e-12	5.44196e-11	17.7534
MSI1	-1.18468	0.00411253	-7.15231	2.07129e-12	5.90288e-11	17.6548
TPD52L2	1.18467	-0.0192654	7.15588	2.0215e-12	5.79437e-11	17.6784
MASP1	-1.18455	0.046792	-7.14624	2.15861e-12	6.11647e-11	17.6148
ZNF75D	1.18426	-0.0351673	7.18814	1.62188e-12	4.77343e-11	17.892
SLC20A1	1.18402	0.000935959	7.12703	2.45971e-12	6.89067e-11	17.4882
RRAS2	1.18353	0.0210523	7.14498	2.17714e-12	6.15136e-11	17.6065
SLC4A4	-1.18217	0.0430222	-7.15842	1.98672e-12	5.71124e-11	17.6952
REV3L	-1.18203	0.00390347	-7.11901	2.59737e-12	7.23532e-11	17.4354
TFPI2	1.18156	0.0503567	7.14964	2.10924e-12	5.99376e-11	17.6372
SV2A	-1.17943	0.0172035	-7.17302	1.79842e-12	5.2617e-11	17.7918
ZNF93	-1.17814	0.0303474	-7.09841	2.98647e-12	8.24949e-11	17.3001
PRR16	1.17645	0.0217623	7.06792	3.66982e-12	9.94271e-11	17.1004
SPAG4	1.17595	-0.0562181	7.19046	1.59639e-12	4.71244e-11	17.9073
RECQL	1.17521	-0.0161816	7.08734	3.21875e-12	8.81724e-11	17.2275
CD200	-1.17514	-0.0242851	-7.13347	2.35442e-12	6.61445e-11	17.5306
GATA6	1.17465	0.0255663	7.09999	2.95482e-12	8.18492e-11	17.3104
ICOSLG	1.17423	0.0474148	7.08326	3.30873e-12	9.01379e-11	17.2008
SCG3	-1.17417	0.0575615	-7.09069	3.14665e-12	8.66775e-11	17.2494
PRKCD	1.17316	-0.0696377	7.18033	1.71081e-12	5.02025e-11	17.8402
SEMA3C	1.17244	-0.0828777	7.12391	2.5125e-12	7.01868e-11	17.4676
ZNF253	-1.17168	0.0185009	-7.06311	3.79075e-12	1.02423e-10	17.069
RAB32	1.171	-0.00274265	7.0887	3.18924e-12	8.76067e-11	17.2364
SRGN	1.16898	-0.00877384	7.06984	3.62247e-12	9.84139e-11	17.113
HLA-E	1.16762	-0.00733718	7.01415	5.26762e-12	1.39282e-10	16.7501
PTOV1	-1.16715	0.0346927	-7.02844	4.78632e-12	1.2732e-10	16.843
TMPRSS5	-1.16693	-0.0355119	-7.04267	4.34983e-12	1.16258e-10	16.9356
NFKB1	1.16672	-0.0364245	7.08431	3.28536e-12	8.97484e-11	17.2076
HSPA5	1.16545	-0.0271289	7.04551	4.26754e-12	1.14368e-10	16.9541
FOXC1	1.16469	0.000219624	7.1086	2.78739e-12	7.74284e-11	17.367
STAP2	1.16429	-0.00732738	7.04635	4.24349e-12	1.14032e-10	16.9596
SS18L1	-1.16368	0.00710559	-6.98732	6.30363e-12	1.62759e-10	16.5762
FAH	1.16315	-0.0687687	7.05001	4.14045e-12	1.11566e-10	16.9834
CCNA1	1.16233	0.0347611	7.00261	5.69106e-12	1.48886e-10	16.6752
MR1	1.16186	-0.0206369	6.99966	5.80432e-12	1.51128e-10	16.6561
LAPTM4B	-1.16157	0.0252116	-6.99554	5.96648e-12	1.54862e-10	16.6294
SNN	-1.16068	0.0368037	-7.00895	5.45455e-12	1.43458e-10	16.7164
DCAF7	-1.16052	0.0134227	-7.02834	4.78948e-12	1.2732e-10	16.8423
NEK7	1.16008	-0.0466009	6.99268	6.08185e-12	1.57444e-10	16.6109
ZNF91	-1.15969	0.0310278	-6.97719	6.74446e-12	1.72341e-10	16.5107
IL11	1.15962	0.0332791	6.97315	6.92882e-12	1.7569e-10	16.4846
TRAF1	1.15961	-0.00914078	6.98581	6.36723e-12	1.63973e-10	16.5665
VRK2	1.15788	-0.00452717	7.01799	5.13388e-12	1.3611e-10	16.7751
ITGBL1	1.15769	0.00160907	6.97458	6.86309e-12	1.7492e-10	16.4938
KLHDC8A	-1.15725	0.0591585	-7.00455	5.6174e-12	1.47349e-10	16.6879
S100B	-1.15671	-0.00313015	-6.9741	6.88467e-12	1.75019e-10	16.4908
ZNF675	-1.15603	0.0101065	-6.96757	7.19102e-12	1.81408e-10	16.4486
HEBP1	1.15602	-0.0229624	6.95659	7.73666e-12	1.94182e-10	16.3778
SLC38A3	-1.15568	-0.00805098	-7.00987	5.42091e-12	1.42953e-10	16.7224
ANXA7	1.15486	-0.0393165	6.9802	6.61031e-12	1.69351e-10	16.5302
MBOAT2	-1.15454	0.0107404	-6.99958	5.80733e-12	1.51128e-10	16.6556
ITGA5	1.1542	0.0298929	6.94459	8.37973e-12	2.06651e-10	16.3004
ADRB2	1.15371	0.00561192	6.94706	8.24292e-12	2.03785e-10	16.3164
CCDC28B	-1.15232	0.0291615	-6.95104	8.02753e-12	1.9996e-10	16.342
NCAM1	-1.15213	-0.00947019	-6.95515	7.81147e-12	1.95564e-10	16.3684
IL15RA	1.15197	-0.00966785	6.96449	7.34052e-12	1.84708e-10	16.4287
DNAJC4	1.15186	-0.00347316	6.90573	1.08417e-11	2.61498e-10	16.051
MCOLN3	1.15139	0.00932883	6.93911	8.69031e-12	2.13777e-10	16.2652
TIMP1	1.15131	0.0282253	6.98499	6.40239e-12	1.6445e-10	16.5611
CACNG4	-1.15116	0.0443519	-6.96807	7.16739e-12	1.81275e-10	16.4518
PLAU	1.14971	0.0380092	6.92132	9.77871e-12	2.3936e-10	16.1509
SLC4A7	1.14903	-0.0428735	6.95061	8.05057e-12	2.0003e-10	16.3392
GLIPR1	1.1487	0.0297697	6.91418	1.0252e-11	2.49096e-10	16.1051
CD46	1.14811	-0.0617995	6.91628	1.01105e-11	2.46262e-10	16.1186
VPS72	-1.14701	0.0573359	-6.94709	8.24125e-12	2.03785e-10	16.3166
ZNF473	-1.14673	0.0193472	-6.90144	1.11538e-11	2.68371e-10	16.0235
RBBP9	-1.14555	0.00784549	-6.91299	1.03335e-11	2.49847e-10	16.0975
ZNF573	-1.14501	0.0143875	-6.87405	1.33635e-11	3.15398e-10	15.8485
GALNT6	1.14453	-0.00718214	6.95314	7.91663e-12	1.97696e-10	16.3555
KDELR3	1.14324	0.00682153	6.87326	1.34335e-11	3.16294e-10	15.8434
UAP1	1.14301	-0.0280817	6.91355	1.02953e-11	2.49535e-10	16.101
CXCL5	1.14295	0.00902277	6.87796	1.30237e-11	3.1034e-10	15.8734
STMN4	-1.14187	0.0561557	-6.87166	1.35763e-11	3.18898e-10	15.8332
FZD3	-1.14185	0.0435825	-6.93123	9.15652e-12	2.24687e-10	16.2146
SOX4	-1.14168	0.0107003	-6.86427	1.42524e-11	3.33197e-10	15.7861
DHX9	-1.14117	-0.0314707	-6.8821	1.26728e-11	3.0271e-10	15.8999
BMP7	-1.141	0.0620923	-6.87616	1.3179e-11	3.1222e-10	15.8619
FXYD5	1.14022	-0.00088336	6.8541	1.52391e-11	3.53754e-10	15.7213
HERPUD1	1.1389	-0.06981	6.91974	9.8818e-12	2.41287e-10	16.1407
STAT6	1.13878	-0.0154731	6.85494	1.51551e-11	3.52633e-10	15.7267
TXN	1.13747	-0.0188959	6.83574	1.71908e-11	3.94431e-10	15.6047
AGPAT5	-1.13726	0.0234674	-6.83228	1.7585e-11	4.01613e-10	15.5827
KCNF1	-1.13714	0.0641869	-6.89381	1.17303e-11	2.81555e-10	15.9747
S100A2	1.13691	-0.00373358	6.8763	1.3167e-11	3.1222e-10	15.8628
HRASLS	-1.13674	-0.0411755	-6.88737	1.22402e-11	2.93084e-10	15.9335
ME1	1.13586	-0.0167831	6.86472	1.42102e-11	3.32997e-10	15.789
NRXN2	-1.13536	0.0420481	-6.84868	1.57915e-11	3.64865e-10	15.6869
ZSCAN16	-1.13408	-0.0470314	-6.84669	1.59991e-11	3.68799e-10	15.6742
SALL1	-1.134	0.0130209	-6.83342	1.74545e-11	3.99554e-10	15.5899
VPS45	-1.1333	0.0299669	-6.82344	1.86343e-11	4.24595e-10	15.5266
KLF4	1.13323	0.0495872	6.82046	1.9001e-11	4.31957e-10	15.5078
PRNP	1.13306	0.0384276	6.85068	1.55849e-11	3.60934e-10	15.6996
SCRG1	-1.13289	-0.0143165	-6.85649	1.50011e-11	3.49873e-10	15.7366
PIN1	-1.13154	0.0257236	-6.80115	2.15572e-11	4.83401e-10	15.3856
IQSEC2	1.13152	0.00400828	6.78628	2.37534e-11	5.30242e-10	15.2917
BAG2	1.13058	-0.0218695	6.81717	1.9414e-11	4.39325e-10	15.487
DCAF6	1.12938	-0.0262071	6.80217	2.14139e-11	4.81278e-10	15.3921
FLNC	1.12721	-0.00042394	6.83697	1.70522e-11	3.9216e-10	15.6125
MT3	-1.12705	-0.00181918	-6.80372	2.11986e-11	4.77749e-10	15.4018
SEZ6L	-1.12704	0.0631037	-6.80365	2.12086e-11	4.77749e-10	15.4014
ZNF629	-1.12666	-0.00473306	-6.77781	2.51011e-11	5.57808e-10	15.2383
HPRT1	1.12535	-0.0364772	6.77463	2.56259e-11	5.68195e-10	15.2183
SLK	1.12501	-0.0288977	6.77202	2.60647e-11	5.7663e-10	15.2019
SDC1	1.12501	-0.0176007	6.76218	2.77866e-11	6.09271e-10	15.14
UBR2	1.12474	-0.0794896	6.87595	1.31973e-11	3.1222e-10	15.8606
NASP	-1.12408	-0.0104191	-6.76777	2.6796e-11	5.90169e-10	15.1751
ECHDC2	1.12397	-0.0190174	6.81893	1.91923e-11	4.35304e-10	15.4981
CASP8	1.12373	-0.0242926	6.76879	2.66192e-11	5.87584e-10	15.1815
HEBP2	1.12364	0.0136488	6.76594	2.71163e-11	5.95896e-10	15.1636
ALDH5A1	-1.12331	0.000403619	-6.74436	3.11945e-11	6.76497e-10	15.028
TMEM214	1.12256	-0.035841	6.78086	2.46074e-11	5.48068e-10	15.2575
EVC	1.12166	0.00963807	6.72625	3.50765e-11	7.50804e-10	14.9146
ATG4A	1.12096	-0.0599162	6.75931	2.83102e-11	6.19379e-10	15.1219
ZNF444	-1.12094	0.0208655	-6.7391	3.2277e-11	6.96915e-10	14.995
NDRG2	-1.12029	0.056699	-6.74563	3.09387e-11	6.72424e-10	15.036
GCHFR	1.11948	-0.0549937	6.75332	2.94339e-11	6.42543e-10	15.0842
TBX3	1.11913	0.0268886	6.72265	3.59041e-11	7.62729e-10	14.892
JAKMIP2	-1.11911	0.0147274	-6.7923	2.28387e-11	5.10978e-10	15.3297
TMEM121	-1.11855	0.0184154	-6.74117	3.18471e-11	6.89138e-10	15.008
PXN	1.1184	0.0212375	6.73415	3.33286e-11	7.16493e-10	14.964
CHPT1	1.1182	-0.0181523	6.7529	2.95127e-11	6.42844e-10	15.0816
PLAGL1	1.11737	4.21764e-05	6.72248	3.59421e-11	7.62729e-10	14.891
WDR55	1.11729	0.00432969	6.73597	3.29379e-11	7.09636e-10	14.9754
SPSB1	1.11556	-0.0065346	6.72124	3.62322e-11	7.66565e-10	14.8832
KCNQ2	-1.11526	0.0726655	-6.7233	3.57522e-11	7.6197e-10	14.8961
ZFAND1	1.11471	-0.0251669	6.69068	4.4129e-11	9.20658e-10	14.6925
RBKS	1.11446	-0.0165822	6.68477	4.58426e-11	9.5239e-10	14.6556
CYLD	1.11371	-0.0620656	6.72761	3.47694e-11	7.45846e-10	14.9231
GSTA4	-1.11284	0.00570621	-6.70805	3.94552e-11	8.28392e-10	14.8008
IL22RA1	1.11269	0.0116573	6.66989	5.04424e-11	1.0285e-09	14.5632
GRN	1.11222	-0.0710114	6.70892	3.92347e-11	8.25514e-10	14.8062
NECAB2	-1.11135	0.0301005	-6.65934	5.39795e-11	1.0961e-09	14.4976
PTPRR	1.11123	-0.00813873	6.6764	4.83777e-11	9.98762e-10	14.6036
WDR44	1.111	-0.0396374	6.69865	4.192e-11	8.78278e-10	14.7421
LMAN1	1.11016	-0.049771	6.67557	4.86361e-11	1.002e-09	14.5984
NACAD	-1.1101	0.0378935	-6.69775	4.21661e-11	8.81566e-10	14.7365
PRSS23	1.10997	0.0331513	6.72463	3.54466e-11	7.57088e-10	14.9044
PPP2R2B	-1.10958	-0.0133629	-6.6839	4.60976e-11	9.5568e-10	14.6503
TAGLN3	-1.10951	0.0707494	-6.69001	4.43212e-11	9.2272e-10	14.6883
SH2B3	1.10879	-0.00957666	6.64999	5.73139e-11	1.15669e-09	14.4397
SLFN12	1.1087	-0.00129623	6.71752	3.71144e-11	7.82567e-10	14.8599
STX3	1.10838	-0.0423311	6.65735	5.46709e-11	1.1056e-09	14.4853
STARD7	-1.1076	-0.00882499	-6.65781	5.45095e-11	1.1046e-09	14.4882
CTCF	-1.1076	-0.0166929	-6.64308	5.99065e-11	1.20655e-09	14.3969
BCAP31	1.10688	-0.0221038	6.6662	5.16548e-11	1.05106e-09	14.5402
MYO1D	1.10673	-0.01496	6.72104	3.62779e-11	7.66565e-10	14.882
COL21A1	1.10655	-0.0249887	6.67441	4.89985e-11	1.00737e-09	14.5912
FOSL2	1.10633	0.0120198	6.67027	5.03206e-11	1.02814e-09	14.5655
CHST11	-1.10599	0.0189588	-6.63169	6.44335e-11	1.28984e-09	14.3264
ASTN1	-1.10576	0.0247396	-6.67063	5.02039e-11	1.02788e-09	14.5677
RUNX3	1.10336	0.0348751	6.60258	7.7585e-11	1.50439e-09	14.1469
EFNB3	-1.10281	0.0545265	-6.67126	5.00003e-11	1.02584e-09	14.5717
TRIB2	-1.10211	0.0735146	-6.68171	4.67524e-11	9.67226e-10	14.6366
KIF2A	-1.10191	0.0066558	-6.63562	6.28351e-11	1.2604e-09	14.3507
DPP6	-1.10176	0.0603044	-6.63769	6.201e-11	1.24638e-09	14.3635
ARVCF	-1.10168	0.030719	-6.61501	7.1674e-11	1.41716e-09	14.2235
PRKAA1	1.10115	-0.014609	6.60298	7.73858e-11	1.50439e-09	14.1494
SERINC3	1.10028	-0.0326822	6.61412	7.20834e-11	1.41716e-09	14.218
CCDC88A	-1.10016	0.0510217	-6.61471	7.18142e-11	1.41716e-09	14.2216
VAMP3	1.09984	-0.037823	6.60259	7.75815e-11	1.50439e-09	14.1469
DAGLA	-1.09906	-0.016632	-6.62851	6.57549e-11	1.31099e-09	14.3068
KCNN4	1.09875	-0.0299979	6.60124	7.82477e-11	1.50837e-09	14.1386
S100A13	1.09705	-0.00309353	6.57165	9.44372e-11	1.79594e-09	13.9569
RUFY3	-1.09697	0.0496701	-6.59693	8.04243e-11	1.5443e-09	14.1121
SDC3	-1.0965	0.0577061	-6.62891	6.55867e-11	1.31028e-09	14.3093
VANGL1	1.09649	0.00164673	6.60191	7.79175e-11	1.50629e-09	14.1427
PCOLCE	1.09645	0.00680984	6.56502	9.84949e-11	1.86236e-09	13.9162
C21orf62	-1.09632	0.0247022	-6.60689	7.54811e-11	1.47516e-09	14.1734
SIAH1	-1.09584	0.0022029	-6.56115	1.00942e-10	1.90136e-09	13.8925
CASK	-1.09582	0.0475138	-6.61297	7.2615e-11	1.42478e-09	14.2109
MBNL1	1.09531	-0.0434434	6.62265	6.82637e-11	1.35554e-09	14.2706
LGI2	-1.09525	0.0338135	-6.5614	1.00781e-10	1.90136e-09	13.894
CTSC	1.09489	-0.0232071	6.56954	9.57144e-11	1.81674e-09	13.9439
ZNF43	-1.09475	0.0277238	-6.61426	7.20182e-11	1.41716e-09	14.2188
ERCC8	-1.09448	-0.0560116	-6.6103	7.38605e-11	1.44635e-09	14.1944
PICK1	1.09439	0.0113378	6.55089	1.07712e-10	2.00596e-09	13.8298
DUSP1	1.09355	0.0388531	6.56785	9.67429e-11	1.83274e-09	13.9336
HLX	1.0935	0.0361345	6.55615	1.04184e-10	1.95498e-09	13.8619
PARP1	-1.09342	-0.0541074	-6.59298	8.24749e-11	1.58061e-09	14.0878
ANXA5	1.09332	-0.0275004	6.57442	9.27916e-11	1.77146e-09	13.9739
EYA2	-1.09236	0.042863	-6.55243	1.06671e-10	1.99032e-09	13.8391
DCX	-1.09204	0.0182957	-6.54126	1.14474e-10	2.112e-09	13.7709
HMBOX1	-1.09161	-0.00952018	-6.62291	6.81509e-11	1.35554e-09	14.2722
ECM1	1.09135	-0.0051381	6.57207	9.41871e-11	1.79464e-09	13.9594
P4HB	1.09132	-0.0670861	6.59121	8.34075e-11	1.59539e-09	14.0769
PIGB	1.09062	-0.0387657	6.55517	1.04833e-10	1.96344e-09	13.8559
VASP	1.0906	-0.0209579	6.53762	1.17138e-10	2.15714e-09	13.7487
LY6E	1.09052	0.0226592	6.59885	7.94477e-11	1.52852e-09	14.1239
RNPS1	-1.09016	-0.0204093	-6.54874	1.09185e-10	2.02576e-09	13.8166
CBS	-1.08963	-0.0573317	-6.60521	7.6296e-11	1.48815e-09	14.1631
LGALS1	1.08874	0.0153657	6.51357	1.36316e-10	2.47346e-09	13.6022
TNFAIP8	1.08788	-0.0777494	6.62057	6.91771e-11	1.37093e-09	14.2578
ENTPD4	1.08732	-0.0128841	6.55454	1.05256e-10	1.96764e-09	13.852
NDUFA3	-1.08686	-0.00840041	-6.51542	1.34736e-10	2.45378e-09	13.6134
METTL7A	-1.08648	-0.0315965	-6.53516	1.18971e-10	2.1868e-09	13.7337
ICAM1	1.08597	-0.0448903	6.5482	1.09564e-10	2.02898e-09	13.8133
FABP7	-1.08535	-0.00671062	-6.49292	1.55212e-10	2.78651e-09	13.4768
CDIPT	1.08518	-0.00601441	6.52626	1.25846e-10	2.2961e-09	13.6794
ZNF3	-1.08518	0.00580447	-6.54937	1.08755e-10	2.02157e-09	13.8204
GPM6B	-1.08491	0.0247309	-6.54131	1.14441e-10	2.112e-09	13.7712
NOVA2	-1.08405	0.0285872	-6.55946	1.02026e-10	1.91812e-09	13.8822
NKX2-2	-1.08395	0.011735	-6.60177	7.79876e-11	1.50629e-09	14.1419
BCL10	1.08352	-0.00930749	6.52835	1.24194e-10	2.27436e-09	13.6922
TRAM2	1.08347	-0.00259888	6.51384	1.36089e-10	2.47346e-09	13.6038
PPARG	1.08265	0.0319307	6.46977	1.79462e-10	3.14826e-09	13.3365
EVL	-1.08198	-0.0197369	-6.47916	1.69205e-10	2.99333e-09	13.3934
PDCD6IP	1.08165	0.0183399	6.48966	1.58424e-10	2.81773e-09	13.457
MT2A	1.08129	0.0473211	6.50917	1.40142e-10	2.53358e-09	13.5754
STX4	1.081	0.0214405	6.47037	1.78793e-10	3.14826e-09	13.3401
SCN3A	-1.08014	0.0105101	-6.51061	1.38883e-10	2.51542e-09	13.5842
DUSP11	1.07989	-0.0567127	6.52889	1.23769e-10	2.27078e-09	13.6955
COL7A1	1.07954	0.00252864	6.46339	1.86775e-10	3.24038e-09	13.298
YAP1	1.0793	0.00349853	6.49288	1.5526e-10	2.78651e-09	13.4765
SLC38A10	1.0789	-0.00944441	6.49018	1.57912e-10	2.81368e-09	13.4601
ZNF107	-1.07886	0.0350714	-6.47417	1.74583e-10	3.08295e-09	13.3632
ANXA2P3	1.07842	-0.0175875	6.46417	1.85866e-10	3.23027e-09	13.3027
LPIN1	1.07835	-0.0299802	6.50024	1.48239e-10	2.67055e-09	13.5212
GMDS	1.07814	-0.0310616	6.52628	1.25829e-10	2.2961e-09	13.6795
NSL1	-1.07788	-0.0296918	-6.47005	1.79142e-10	3.14826e-09	13.3383
SERPINB8	1.07762	-0.01506	6.49026	1.57834e-10	2.81368e-09	13.4606
RUNX2	1.0776	0.0158854	6.4667	1.82941e-10	3.19291e-09	13.318
EDNRB	-1.0763	-0.0198247	-6.46536	1.84487e-10	3.21196e-09	13.3099
LRP3	-1.0762	0.0545871	-6.48547	1.62647e-10	2.88765e-09	13.4316
COL4A6	1.07611	-0.0129989	6.45525	1.96519e-10	3.38567e-09	13.2488
ZNF711	-1.07598	-0.0218709	-6.46234	1.88001e-10	3.25594e-09	13.2916
APBB2	-1.07531	-0.0216526	-6.46163	1.88835e-10	3.26467e-09	13.2874
SRI	-1.07489	0.0303472	-6.44208	2.13364e-10	3.64413e-09	13.1694
SLC27A6	1.07471	-0.0069408	6.45189	2.00693e-10	3.45157e-09	13.2285
BACE2	1.07441	-0.0282386	6.48471	1.63425e-10	2.89626e-09	13.427
SLCO3A1	1.07409	-0.0490018	6.46659	1.8307e-10	3.19291e-09	13.3173
GNG4	-1.07396	0.0641708	-6.50022	1.48259e-10	2.67055e-09	13.521
SPRY1	-1.07358	0.038621	-6.43987	2.16323e-10	3.68196e-09	13.1561
EFEMP1	1.07357	0.0269864	6.45004	2.0302e-10	3.48553e-09	13.2174
ANGPT1	1.07326	-0.00657748	6.44498	2.09529e-10	3.59105e-09	13.1869
ASPH	1.07292	0.0051305	6.46969	1.79555e-10	3.14826e-09	13.336
FAT4	1.0728	0.0173283	6.41416	2.53856e-10	4.28394e-09	13.0016
PLEKHO1	-1.07248	0.0931951	-6.49048	1.57612e-10	2.81368e-09	13.4619
LRP4	-1.07219	0.0188389	-6.42391	2.38934e-10	4.05287e-09	13.0601
MYCN	-1.07136	0.0132173	-6.45743	1.93861e-10	3.34571e-09	13.262
TBC1D9	1.07133	0.00840423	6.40083	2.75758e-10	4.61416e-09	12.9217
KLF2	1.07131	-0.00351804	6.44426	2.10474e-10	3.60099e-09	13.1826
NES	-1.07117	0.0456665	-6.4674	1.82142e-10	3.18797e-09	13.3222
SLC38A2	1.07095	-0.0278675	6.42328	2.3987e-10	4.06178e-09	13.0563
CLIP2	-1.06948	0.0723961	-6.49196	1.56151e-10	2.79743e-09	13.4709
KLF15	-1.069	0.0292365	-6.39794	2.8075e-10	4.65829e-09	12.9044
TOP2B	-1.06886	-0.0203777	-6.40681	2.65721e-10	4.46132e-09	12.9575
MAGI2	-1.06754	0.00109095	-6.44031	2.15729e-10	3.67818e-09	13.1588
JAM2	-1.06711	0.00915631	-6.41005	2.60425e-10	4.37983e-09	12.977
COL6A3	1.067	0.0183426	6.38218	3.09539e-10	5.09323e-09	12.8102
RNF219	-1.06686	-0.00388195	-6.42061	2.43883e-10	4.12266e-09	13.0403
CLINT1	1.06681	-0.0275331	6.39913	2.78685e-10	4.64744e-09	12.9115
IMPAD1	1.06611	-0.00014779	6.39873	2.79376e-10	4.65109e-09	12.9091
TSPAN3	-1.06553	0.019153	-6.36469	3.44881e-10	5.57153e-09	12.7058
NPC2	1.06505	-0.037517	6.37726	3.19098e-10	5.21581e-09	12.7808
YIPF5	1.0649	-0.0616815	6.43463	2.235e-10	3.79759e-09	13.1246
APC	-1.06461	0.00309823	-6.38093	3.11944e-10	5.1073e-09	12.8027
BTG2	-1.0641	0.0448123	-6.38099	3.11838e-10	5.1073e-09	12.803
DZIP3	-1.06398	0.00561766	-6.41101	2.58877e-10	4.36121e-09	12.9827
NLRX1	1.0637	0.00208969	6.36893	3.35968e-10	5.44782e-09	12.7311
2021-09-07	-1.06341	0.00530959	-6.36889	3.36047e-10	5.44782e-09	12.7308
KANK1	-1.06328	-0.0347276	-6.39812	2.80437e-10	4.65829e-09	12.9055
ARID4A	-1.06305	-0.0251684	-6.36897	3.35876e-10	5.44782e-09	12.7313
PCBP4	-1.06299	-0.0315939	-6.36446	3.45369e-10	5.57153e-09	12.7044
IL7	1.06223	0.031345	6.34257	3.95255e-10	6.33496e-09	12.5742
GOT1	1.06184	-0.0523906	6.39913	2.78687e-10	4.64744e-09	12.9115
GOLT1B	1.06107	-0.0143965	6.36471	3.44846e-10	5.57153e-09	12.7059
ZNF426	-1.06075	0.0318762	-6.37218	3.29285e-10	5.36458e-09	12.7505
PARP3	1.06068	0.0211416	6.34001	4.01542e-10	6.40211e-09	12.559
LSM8	-1.06066	0.00733999	-6.35922	3.56709e-10	5.74511e-09	12.6732
KRT7	1.0603	-0.0170039	6.39127	2.92606e-10	4.83068e-09	12.8645
ATP6V0E2	-1.06016	0.00374723	-6.34046	4.00424e-10	6.39708e-09	12.5617
TRIM21	1.06002	-0.000834021	6.32967	4.27901e-10	6.78127e-09	12.4976
CRB1	-1.05947	-0.0109311	-6.39713	2.8216e-10	4.67383e-09	12.8996
SYNGR2	1.05893	-0.0379223	6.33592	4.11765e-10	6.54653e-09	12.5347
ALDH1A3	1.05881	0.00147168	6.34139	3.98129e-10	6.37071e-09	12.5672
GSTO1	1.05838	-0.0109505	6.33981	4.02033e-10	6.40211e-09	12.5578
AGPAT2	1.05826	0.0512887	6.38412	3.05849e-10	5.04091e-09	12.8217
GBP2	1.05822	0.00119272	6.34625	3.86408e-10	6.20323e-09	12.5961
CNTFR	-1.05818	0.0262318	-6.38176	3.10347e-10	5.09804e-09	12.8076
TRADD	1.05669	-0.00714984	6.32149	4.4994e-10	7.09643e-09	12.4492
REEP2	-1.05631	0.0568833	-6.37577	3.22069e-10	5.25568e-09	12.7719
TPD52L1	1.05626	-0.0663234	6.39598	2.84179e-10	4.69941e-09	12.8927
ITGA2	1.05599	-0.0100123	6.32611	4.37346e-10	6.9088e-09	12.4766
PPP2R3A	1.05497	0.0174832	6.32799	4.32331e-10	6.84051e-09	12.4877
CBX5	-1.05418	-0.0037793	-6.30837	4.87619e-10	7.62798e-09	12.3716
SAV1	1.05397	0.00537121	6.31624	4.64659e-10	7.29367e-09	12.4181
UPP1	1.05339	-0.0171838	6.31833	4.58742e-10	7.21225e-09	12.4305
CPT1A	1.05321	-0.00620481	6.2909	5.42646e-10	8.41101e-09	12.2684
FADD	1.05231	0.00882445	6.27929	5.82505e-10	8.93085e-09	12.2
MAP6D1	-1.05212	-0.0033797	-6.30535	4.96748e-10	7.73597e-09	12.3537
MTSS1	-1.05177	-0.00599746	-6.29794	5.19772e-10	8.0818e-09	12.31
ZNF614	-1.05165	0.0117512	-6.27434	6.00388e-10	9.16241e-09	12.1709
ATAD2B	-1.05163	0.0383419	-6.28589	5.59522e-10	8.64548e-09	12.2389
RASGRP1	-1.05093	-0.0281015	-6.33308	4.19027e-10	6.6513e-09	12.5178
PAM	1.0509	-0.00592372	6.319	4.56853e-10	7.19398e-09	12.4344
PLS3	1.05025	0.0294622	6.40507	2.68607e-10	4.50213e-09	12.9471
UBE2A	1.05019	-0.0355724	6.3488	3.80372e-10	6.11626e-09	12.6113
DPYD	1.04978	-0.0132725	6.30554	4.96149e-10	7.73597e-09	12.3548
GINS2	-1.04906	-0.00433905	-6.27546	5.96296e-10	9.11402e-09	12.1775
KCND2	-1.04902	0.0423951	-6.2691	6.19871e-10	9.44515e-09	12.14
YPEL1	-1.04839	0.023132	-6.25269	6.85003e-10	1.02847e-08	12.0437
APOL2	1.04743	0.0243715	6.25283	6.84394e-10	1.02847e-08	12.0445
MTSS1L	-1.04683	0.00391637	-6.26715	6.27286e-10	9.54344e-09	12.1286
ENAH	-1.04681	0.0450332	-6.26489	6.35993e-10	9.66104e-09	12.1153
YIPF2	1.04653	-0.0200467	6.28382	5.66631e-10	8.72806e-09	12.2267
IL1A	1.04615	0.0185659	6.24537	7.16138e-10	1.06977e-08	12.0008
SIL1	1.04533	-0.0302343	6.2526	6.8537e-10	1.02847e-08	12.0432
ATF1	1.04481	-0.0750247	6.30816	4.88271e-10	7.62798e-09	12.3703
CUL4B	1.04475	-0.0355436	6.25456	6.77248e-10	1.02093e-08	12.0547
LRRFIP1	1.044	-0.047241	6.28468	5.63671e-10	8.69601e-09	12.2317
HMGA2	1.04349	0.0301322	6.25019	6.95462e-10	1.04203e-08	12.0291
PLLP	-1.04312	-0.0328493	-6.27863	5.84861e-10	8.95308e-09	12.1961
INPP1	1.04288	0.0088706	6.25571	6.72542e-10	1.01694e-08	12.0614
EML3	1.04279	-0.0174053	6.26138	6.4973e-10	9.85457e-09	12.0947
QSOX1	1.04268	0.00631553	6.27973	5.8096e-10	8.92098e-09	12.2026
SLC39A6	-1.04217	0.0393672	-6.24065	7.36967e-10	1.09923e-08	11.9732
TMF1	1.0418	-0.0325692	6.28043	5.78485e-10	8.89679e-09	12.2067
TMEM109	1.04148	-0.0198627	6.25484	6.76088e-10	1.02074e-08	12.0563
NLGN1	-1.04135	0.0414535	-6.29369	5.33464e-10	8.28167e-09	12.2849
CTTN	1.04132	0.0208366	6.23854	7.46487e-10	1.10854e-08	11.9608
AGT	-1.04049	0.0416121	-6.24008	7.39529e-10	1.10139e-08	11.9698
CREB5	-1.03996	0.0207447	-6.23852	7.46576e-10	1.10854e-08	11.9607
SPAG1	1.03995	0.0258319	6.23666	7.55027e-10	1.11941e-08	11.9498
PIGK	1.03966	-0.0435543	6.20647	9.06462e-10	1.32604e-08	11.7735
ARFGEF2	1.03963	-0.0878363	6.3127	4.74857e-10	7.44193e-09	12.3972
NOTCH4	-1.03947	0.0373606	-6.24906	7.00254e-10	1.04763e-08	12.0224
ZNF227	-1.03938	-0.0017018	-6.22949	7.88603e-10	1.16569e-08	11.9079
MGAT1	1.03891	-0.0188698	6.21882	8.41248e-10	1.23429e-08	11.8455
PIP4K2C	1.03884	-0.00439997	6.19772	9.55635e-10	1.38975e-08	11.7226
CLIC1	1.03874	-0.00601551	6.19622	9.64369e-10	1.40039e-08	11.7138
SNCAIP	-1.03746	0.0387618	-6.22661	8.02489e-10	1.18445e-08	11.891
THBS1	1.03706	-0.0529635	6.23275	7.73162e-10	1.14458e-08	11.9269
CXXC4	-1.03675	0.0095412	-6.21967	8.36906e-10	1.22974e-08	11.8505
TGFBI	1.03613	-0.0147667	6.19551	9.68485e-10	1.4043e-08	11.7097
C6orf106	1.03608	-0.080518	6.2883	5.51344e-10	8.53246e-09	12.2531
LMO4	-1.03574	0.031364	-6.22332	8.18627e-10	1.20467e-08	11.8718
SIGIRR	1.03522	0.0380819	6.19106	9.94806e-10	1.43197e-08	11.6839
TMEM39A	1.03466	-0.0313113	6.20466	9.1643e-10	1.3347e-08	11.763
YIF1A	1.03397	-0.00982495	6.21369	8.67774e-10	1.27132e-08	11.8156
INSM1	-1.03366	-0.000363757	-6.19069	9.97034e-10	1.43309e-08	11.6817
SYP	-1.03269	0.0116836	-6.20585	9.09878e-10	1.32907e-08	11.7699
CRIM1	1.03245	-0.0091508	6.19375	9.78816e-10	1.41721e-08	11.6995
SRPX2	1.03203	0.00583743	6.17809	1.0757e-09	1.53944e-08	11.6085
ANXA2P1	1.0318	-0.0380082	6.18867	1.00925e-09	1.44855e-08	11.67
MAPK8IP1	-1.03174	0.0452243	-6.19254	9.85973e-10	1.42548e-08	11.6925
PQLC3	1.0313	0.0509947	6.19172	9.90886e-10	1.43049e-08	11.6877
PIGV	1.0313	-0.0198412	6.16011	1.19841e-09	1.70274e-08	11.5044
PCMTD2	-1.03073	0.0167441	-6.14088	1.34486e-09	1.8705e-08	11.3933
JAM3	-1.02987	0.0128547	-6.17527	1.09408e-09	1.5635e-08	11.5922
GCLC	1.02962	-0.0550238	6.19142	9.92648e-10	1.43095e-08	11.686
FUZ	-1.02936	-0.00982324	-6.14696	1.29682e-09	1.81905e-08	11.4283
NIPAL2	1.02888	0.00614171	6.15297	1.25092e-09	1.7672e-08	11.4631
SH3PXD2A	1.02867	-0.0342105	6.1881	1.01275e-09	1.45147e-08	11.6666
REEP5	1.0286	0.00333794	6.16193	1.18539e-09	1.68666e-08	11.5149
ENPP1	1.02852	-0.0724797	6.26034	6.53836e-10	9.90166e-09	12.0886
SEPHS1	-1.02784	-0.00645217	-6.14492	1.31274e-09	1.83617e-08	11.4166
GOLPH3L	1.02761	-0.0367231	6.1675	1.14642e-09	1.63592e-08	11.5471
ULBP2	1.0275	-0.00967776	6.15327	1.24864e-09	1.7665e-08	11.4648
PAQR6	-1.02734	-0.00909138	-6.13982	1.35343e-09	1.87979e-08	11.3871
RAF1	-1.02733	0.00851951	-6.13058	1.43041e-09	1.96736e-08	11.3338
GADD45B	1.02668	0.0222621	6.15153	1.26172e-09	1.77737e-08	11.4548
RAMP2	-1.02651	0.0201794	-6.14455	1.31562e-09	1.8376e-08	11.4145
EXT1	1.0265	0.0333738	6.14744	1.2931e-09	1.8164e-08	11.4311
PMAIP1	1.02642	0.0426558	6.13227	1.41601e-09	1.95299e-08	11.3436
ARHGEF7	-1.0259	0.007178	-6.20557	9.1143e-10	1.32937e-08	11.7683
RHOBTB3	-1.0254	-0.0575695	-6.16532	1.1615e-09	1.65505e-08	11.5345
IL7R	1.0254	0.0122735	6.13701	1.37646e-09	1.90908e-08	11.3709
USP25	1.02525	-0.04203	6.1437	1.32234e-09	1.84178e-08	11.4095
SH3TC1	1.02511	-0.0159243	6.15974	1.20108e-09	1.70408e-08	11.5022
USO1	1.02508	-0.0129796	6.15534	1.23323e-09	1.74719e-08	11.4768
HLA-F	1.02491	-0.0264069	6.13496	1.39344e-09	1.92993e-08	11.3591
TNFRSF10D	1.02487	0.0227969	6.11205	1.59777e-09	2.16739e-08	11.2272
BET1L	1.02482	0.0018446	6.15269	1.25303e-09	1.76764e-08	11.4614
ZNF345	-1.02463	0.0146005	-6.12575	1.47224e-09	2.01928e-08	11.3061
SVIL	1.02417	-0.0572586	6.22389	8.15796e-10	1.2023e-08	11.8752
FAM3A	1.02401	0.0125165	6.14431	1.31756e-09	1.83771e-08	11.413
HMOX1	1.02395	-0.0114656	6.14649	1.30043e-09	1.82153e-08	11.4256
CLDN1	1.02356	0.0171301	6.10936	1.62355e-09	2.19634e-08	11.2118
ARCN1	1.02335	0.00314016	6.12142	1.51089e-09	2.0637e-08	11.2811
PPP1R13L	1.02196	0.012018	6.09052	1.81626e-09	2.41087e-08	11.1037
ABCD1	1.02118	-0.028224	6.10867	1.6303e-09	2.20246e-08	11.2078
SLC46A3	1.02093	0.022788	6.12745	1.45739e-09	2.00168e-08	11.3158
PITPNM1	1.0207	0.0192837	6.11058	1.61179e-09	2.18342e-08	11.2188
RPS6KA3	1.02064	-0.0432122	6.14814	1.28766e-09	1.81133e-08	11.4352
MAP3K2	1.02035	-0.0255732	6.09748	1.74267e-09	2.32568e-08	11.1436
OLFML2B	1.02026	0.0353888	6.08263	1.90343e-09	2.51644e-08	11.0586
RIPK4	1.01999	0.00551953	6.10106	1.70585e-09	2.28269e-08	11.1642
GFPT1	1.01953	-0.0645936	6.1182	1.54019e-09	2.09504e-08	11.2626
ZNF24	-1.01924	-0.000433093	-6.13351	1.40553e-09	1.94124e-08	11.3508
PEX6	1.01916	-0.0639518	6.12067	1.51766e-09	2.07009e-08	11.2768
ATP7A	1.01877	-0.0641792	6.10734	1.6432e-09	2.21384e-08	11.2002
NAV3	1.01862	-0.0299462	6.11518	1.56814e-09	2.13013e-08	11.2453
CDH10	-1.01842	0.0335033	-6.10528	1.66354e-09	2.22909e-08	11.1884
SNRPD1	-1.01836	0.0146615	-6.10667	1.64984e-09	2.21517e-08	11.1963
CSRP1	1.01826	-0.0457258	6.10673	1.6492e-09	2.21517e-08	11.1967
HTR7	1.01822	-0.0138329	6.09125	1.80845e-09	2.40373e-08	11.1079
DHTKD1	-1.01773	-0.0176565	-6.12397	1.48799e-09	2.03806e-08	11.2958
TGOLN2	1.01751	-0.0386267	6.09148	1.80597e-09	2.40367e-08	11.1092
PHF2	-1.01731	0.0273825	-6.12309	1.4959e-09	2.04606e-08	11.2907
MPPED2	-1.01726	0.0481158	-6.08873	1.8357e-09	2.43341e-08	11.0935
IL18R1	1.0169	0.0135445	6.05561	2.23409e-09	2.89933e-08	10.9043
RAB33A	-1.01675	-0.0493974	-6.11892	1.53359e-09	2.08893e-08	11.2667
S100A10	1.01609	0.0330664	6.09758	1.74159e-09	2.32568e-08	11.1442
LLGL2	1.01608	-0.00932947	6.13192	1.41896e-09	1.95433e-08	11.3416
JUP	1.01594	-0.0568537	6.13364	1.40448e-09	1.94124e-08	11.3515
IFI35	1.01587	0.011771	6.06328	2.13489e-09	2.78521e-08	10.9481
HPD	1.01512	-0.0100487	6.07582	1.98202e-09	2.61335e-08	11.0196
WNT5B	1.01466	0.0226401	6.07491	1.99273e-09	2.62049e-08	11.0144
WASF3	-1.01461	0.0389342	-6.07541	1.9868e-09	2.61618e-08	11.0173
ATP1A1	1.01404	-0.0453686	6.08324	1.89658e-09	2.51074e-08	11.0621
SLC31A2	1.0137	-0.0522172	6.10656	1.6509e-09	2.21517e-08	11.1957
MAN1B1	1.0131	-0.016112	6.06927	2.06052e-09	2.6953e-08	10.9822
KCNH2	-1.0131	-0.00888477	-6.06281	2.14087e-09	2.78934e-08	10.9454
KBTBD2	-1.01292	0.0136402	-6.07229	2.02395e-09	2.65801e-08	10.9995
GPR39	1.01292	0.00747052	6.06079	2.16664e-09	2.8192e-08	10.9338
HERC4	1.01287	-0.0573361	6.10781	1.63865e-09	2.21073e-08	11.2029
CELSR3	-1.0128	0.0154112	-6.04486	2.3807e-09	3.06148e-08	10.8431
TRAM1	1.01176	0.0173118	6.09342	1.78525e-09	2.37929e-08	11.1203
CHD1	-1.01158	0.00459481	-6.0231	2.70668e-09	3.42109e-08	10.7195
TNIP1	1.01133	-0.00290469	6.03455	2.53006e-09	3.23671e-08	10.7845
B4GALT1	1.01109	-0.0108922	6.01632	2.81698e-09	3.53516e-08	10.6811
PKP3	1.00961	0.0235712	6.02989	2.60061e-09	3.30984e-08	10.758
NLGN4X	-1.00959	0.0255031	-6.07164	2.03169e-09	2.66464e-08	10.9958
DENND3	1.00911	0.0415666	6.04784	2.33914e-09	3.01587e-08	10.8601
PTPRU	1.00904	0.0381223	6.04913	2.32142e-09	3.00085e-08	10.8674
RRBP1	1.00888	-0.021541	6.01835	2.78351e-09	3.50652e-08	10.6926
PCDH9	-1.0085	0.0036514	-6.0683	2.07237e-09	2.70722e-08	10.9767
EREG	1.00822	0.000590643	6.02297	2.70878e-09	3.42109e-08	10.7188
DYNLT3	1.00815	0.00972074	6.04834	2.33225e-09	3.01092e-08	10.8629
PAPSS2	1.00796	0.00576651	6.05571	2.23276e-09	2.89933e-08	10.9049
MOAP1	-1.00769	-0.0375048	-6.03041	2.59266e-09	3.30397e-08	10.761
TMEM144	1.00729	0.01207	6.02378	2.69585e-09	3.41348e-08	10.7234
STOM	1.00717	0.00367624	6.05376	2.25864e-09	2.92352e-08	10.8938
SMARCD2	1.00697	-0.0555624	6.0442	2.38998e-09	3.06941e-08	10.8394
GALK1	1.00644	-0.0103753	6.01706	2.80475e-09	3.52429e-08	10.6853
COL1A1	1.00634	-0.0157742	6.02463	2.68237e-09	3.40076e-08	10.7282
TMEM97	-1.0061	-0.0247387	-6.03829	2.47492e-09	3.17438e-08	10.8057
SERPINB6	1.00599	-0.0162236	6.02902	2.61393e-09	3.32251e-08	10.7531
TSPAN7	-1.00551	-0.0488176	-6.06974	2.05472e-09	2.69127e-08	10.9849
RAC2	1.00547	0.00627644	6.01964	2.76236e-09	3.48431e-08	10.6999
MFAP2	1.00544	-0.0279132	6.05484	2.24429e-09	2.90876e-08	10.8999
RND1	-1.00522	0.0255362	-6.00668	2.98119e-09	3.7083e-08	10.6265
FAF2	1.00504	-0.0469026	6.01245	2.88173e-09	3.59816e-08	10.6592
PPFIBP2	-1.0046	0.0157154	-6.01051	2.91486e-09	3.63035e-08	10.6482
OSMR	1.00445	0.023808	6.0338	2.54128e-09	3.24687e-08	10.7802
KIF1A	-1.00403	-0.00308447	-6.0457	2.36888e-09	3.05025e-08	10.8479
ACSL1	1.00368	-0.0513665	6.08161	1.91506e-09	2.52845e-08	11.0527
EHD4	1.00301	-0.0597975	6.01486	2.84116e-09	3.55199e-08	10.6728
PNPLA4	1.00276	-0.0115824	6.01144	2.89893e-09	3.61507e-08	10.6535
PTCD3	-1.00238	-0.0310664	-5.98736	3.33901e-09	4.11714e-08	10.5174
COL17A1	1.0018	0.00850203	6.0151	2.83725e-09	3.55159e-08	10.6742
HCFC1R1	1.00164	0.00164297	5.98387	3.408e-09	4.19697e-08	10.4977
OSBPL10	1.0011	-0.0345731	6.0156	2.82892e-09	3.54565e-08	10.677
STEAP3	1.00094	0.000445356	5.99232	3.24343e-09	4.0143e-08	10.5454
LNPEP	1.00048	-0.0379278	5.99521	3.18889e-09	3.9567e-08	10.5617
ING3	-1.00047	-0.0496262	-5.99189	3.25152e-09	4.01928e-08	10.543
SLC7A11	0.999303	-0.0417343	5.99287	3.23294e-09	4.00634e-08	10.5485
BMP4	0.999179	-0.00331434	5.9688	3.72209e-09	4.54979e-08	10.4129
GATAD2A	-0.999115	0.0216638	-5.96975	3.70148e-09	4.53019e-08	10.4182
SEMA6D	-0.999001	0.0224369	-5.9544	4.04844e-09	4.91227e-08	10.332
CREB1	-0.998989	-0.0138799	-5.96524	3.8003e-09	4.63966e-08	10.3929
ZNF510	-0.998567	-0.00216384	-6.0059	2.99495e-09	3.72074e-08	10.6221
CARD10	0.998451	0.0420813	5.97338	3.62365e-09	4.44136e-08	10.4387
DCHS1	-0.998169	0.0384703	-6.031	2.58357e-09	3.29664e-08	10.7643
PDS5B	-0.997754	0.000977743	-5.95227	4.09915e-09	4.96163e-08	10.32
TLR1	0.997639	-0.0257361	5.97335	3.62441e-09	4.44136e-08	10.4385
SLC25A24	0.997519	-0.039057	5.95167	4.11344e-09	4.97284e-08	10.3167
C4orf19	-0.9973	-0.0345733	-5.99041	3.27978e-09	4.04916e-08	10.5346
SEC24D	0.996679	-0.00116445	5.95044	4.14295e-09	5.0024e-08	10.3098
RAP2C	0.996648	-0.0213202	5.9534	4.07212e-09	4.93495e-08	10.3264
EIF4EBP2	-0.996023	-0.0227192	-5.94639	4.24202e-09	5.10332e-08	10.287
NBR1	0.99582	-0.0079754	5.95714	3.98435e-09	4.85236e-08	10.3473
ADAMTS3	-0.995557	0.0386284	-5.95576	4.01637e-09	4.88535e-08	10.3396
EML2	0.995463	-0.0199084	5.9296	4.67713e-09	5.59276e-08	10.1931
BPTF	-0.995119	-0.0199699	-5.94925	4.17187e-09	5.03117e-08	10.3031
UTRN	0.995114	0.0233813	6.02781	2.63257e-09	3.34191e-08	10.7463
DENND2A	-0.994551	0.0655004	-6.0359	2.51002e-09	3.21523e-08	10.7922
ZNF185	0.994516	-0.0492984	5.95505	4.03313e-09	4.89971e-08	10.3356
AVPI1	0.994283	-0.0759318	6.01733	2.80029e-09	3.52317e-08	10.6868
ZNF548	-0.994274	0.0166423	-5.94725	4.22068e-09	5.08383e-08	10.2919
SLC39A4	0.99346	0.00946881	5.94297	4.32717e-09	5.19944e-08	10.2679
RAB11FIP5	0.993192	0.0787301	5.97894	3.50774e-09	4.30907e-08	10.47
SLC6A1	-0.992881	0.0530564	-5.92147	4.90331e-09	5.82798e-08	10.1476
RIPK1	0.992668	-0.0399659	5.93389	4.56207e-09	5.46178e-08	10.217
TXNRD1	0.992549	-0.0312299	5.92755	4.73312e-09	5.65288e-08	10.1816
STK17B	0.992363	0.019493	5.91815	4.99878e-09	5.92011e-08	10.1291
PARVA	0.992307	0.0630466	5.98332	3.41892e-09	4.20519e-08	10.4946
SOX5	-0.99091	-0.00762756	-5.94053	4.38922e-09	5.2676e-08	10.2542
ALDH3A1	0.990908	0.00413454	5.90595	5.36478e-09	6.29327e-08	10.0611
ABCA3	-0.99083	-0.0240419	-5.91721	5.02599e-09	5.94521e-08	10.1239
PIK3R2	-0.990588	-0.0164325	-5.92376	4.83852e-09	5.76483e-08	10.1604
NRIP3	0.990486	0.0292354	5.91948	4.96025e-09	5.88152e-08	10.1365
GBP1	0.990426	-0.0101922	5.89373	5.7579e-09	6.7067e-08	9.9931
DLEU2	-0.990241	0.0178453	-5.91063	5.2213e-09	6.16151e-08	10.0872
ELOVL5	0.990106	-0.0401143	5.93662	4.49024e-09	5.3823e-08	10.2323
PTP4A3	-0.99002	0.0234316	-5.91286	5.15441e-09	6.08984e-08	10.0996
RAI14	0.989996	0.0076762	5.96084	3.89911e-09	4.75441e-08	10.3682
OAT	0.989941	-0.0655488	5.92483	4.80846e-09	5.73593e-08	10.1664
PIGT	0.989701	-0.0549103	5.9082	5.29557e-09	6.22686e-08	10.0736
WDR1	0.989444	0.00906946	5.89565	5.6943e-09	6.64828e-08	10.0038
PBX1	-0.988984	0.0281188	-5.8967	5.65985e-09	6.63154e-08	10.0096
BCL2	-0.988547	0.031072	-5.89591	5.68582e-09	6.64623e-08	10.0052
HNRNPA2B1	-0.988221	0.00123215	-5.89645	5.66805e-09	6.6333e-08	10.0082
ST6GALNAC2	0.988219	-0.0326478	5.89168	5.82654e-09	6.77867e-08	9.9817
DSE	0.987848	0.0260025	5.89379	5.75611e-09	6.7067e-08	9.9934
EPS8L2	0.987299	-0.0163011	5.90857	5.28414e-09	6.22686e-08	10.0757
MAST1	-0.98633	0.0227061	-5.87556	6.3946e-09	7.39605e-08	9.89223
KCNMA1	0.986273	0.0357973	5.91953	4.95895e-09	5.88152e-08	10.1368
DUSP26	-0.985325	-0.0201327	-5.92161	4.89936e-09	5.82798e-08	10.1484
CA14	-0.984652	-0.000191422	-5.86171	6.92556e-09	7.90942e-08	9.81553
SSBP2	-0.983822	0.0254967	-5.88812	5.94759e-09	6.91136e-08	9.96193
PTPRD	-0.983582	0.0189374	-5.87423	6.44384e-09	7.43561e-08	9.88485
STAT5A	0.982532	-0.0263	5.87828	6.29509e-09	7.28948e-08	9.90731
TRPC1	0.982523	0.00242295	5.86898	6.64173e-09	7.64611e-08	9.85577
SLC16A6	0.982049	-0.029819	5.88152	6.17873e-09	7.16313e-08	9.92526
YWHAZ	0.98199	0.00693926	5.88791	5.95481e-09	6.91163e-08	9.96076
EXTL3	-0.981749	0.0312101	-5.90839	5.28976e-09	6.22686e-08	10.0747
COPB2	0.981261	-0.0214983	5.87434	6.43977e-09	7.43561e-08	9.88546
TNFRSF12A	0.981182	0.0641032	5.90744	5.31895e-09	6.24693e-08	10.0694
PCM1	-0.98097	-0.00707364	-5.8705	6.58384e-09	7.5883e-08	9.86419
CENPF	-0.980693	-0.0298757	-5.84485	7.63029e-09	8.64329e-08	9.72235
OSR2	0.980564	-0.0248934	5.85209	7.31943e-09	8.31019e-08	9.76234
DSG2	0.979975	-0.0109062	5.84425	7.65665e-09	8.66322e-08	9.71904
PTPRA	-0.979793	0.0384744	-5.85354	7.25866e-09	8.26017e-08	9.77036
GPR37L1	-0.979465	0.0230069	-5.83487	8.07979e-09	9.10034e-08	9.66732
ZNF146	-0.979199	0.0220126	-5.8437	7.68094e-09	8.68078e-08	9.71599
CCNO	0.979148	-0.00485059	5.86328	6.86354e-09	7.89227e-08	9.82418
SEC23A	0.978908	-0.0399035	5.85329	7.26913e-09	8.26258e-08	9.76897
HCCS	0.978888	-0.0470758	5.86257	6.89156e-09	7.90942e-08	9.82026
PPFIA1	0.978715	-0.0277958	5.83385	8.12687e-09	9.13257e-08	9.66174
C11orf49	-0.978426	0.0460974	-5.85484	7.20491e-09	8.20845e-08	9.7775
TSPAN12	-0.977737	0.0216599	-5.84057	7.81991e-09	8.82775e-08	9.69875
RFXANK	-0.97747	0.0160258	-5.82149	8.7228e-09	9.73586e-08	9.59371
S100A6	0.977407	0.00748744	5.81918	8.83912e-09	9.84348e-08	9.58098
AUH	0.976713	-0.0661927	5.86169	6.92644e-09	7.90942e-08	9.81541
MYL12A	0.97622	0.00977437	5.82187	8.70385e-09	9.72569e-08	9.5958
TMEM151B	-0.976056	0.0275743	-5.81064	9.28111e-09	1.02663e-07	9.53408
LSM7	-0.975719	0.0351166	-5.82521	8.53936e-09	9.55269e-08	9.61414
FBXO42	-0.975693	0.0217874	-5.81804	8.89657e-09	9.88519e-08	9.57475
GOLGB1	0.975248	-0.016926	5.82006	8.79481e-09	9.80518e-08	9.58581
PAK1	0.974954	0.0434832	5.86173	6.92487e-09	7.90942e-08	9.81562
PUS3	-0.974921	-0.0150257	-5.8341	8.11541e-09	9.13007e-08	9.66309
ITGA1	0.974838	-0.00294659	5.80473	9.59942e-09	1.05476e-07	9.50167
ATG5	0.974684	-0.0589765	5.86179	6.92233e-09	7.90942e-08	9.81598
SLIT3	0.974363	0.0179532	5.79672	1.00481e-08	1.09796e-07	9.45777
TBKBP1	-0.973948	0.0326591	-5.85154	7.3427e-09	8.32706e-08	9.75929
ARL1	0.973875	-0.0276502	5.80813	9.41511e-09	1.03873e-07	9.5203
HEY2	-0.97385	0.0261098	-5.81213	9.20225e-09	1.01905e-07	9.54228
STARD5	0.973721	-0.0492639	5.86014	6.98872e-09	7.97133e-08	9.8068
GDAP1L1	-0.973633	0.0330578	-5.81581	9.01088e-09	1.0001e-07	9.56248
RGS12	-0.973291	0.0283228	-5.81352	9.12968e-09	1.01215e-07	9.54989
AKR1B10	0.973158	0.00714258	5.78923	1.0486e-08	1.14077e-07	9.41678
GLUL	-0.973148	0.00952515	-5.8297	8.32255e-09	9.33126e-08	9.63886
SMARCC1	-0.972921	0.00167914	-5.79975	9.87587e-09	1.08273e-07	9.47438
LRRK1	0.972577	0.000819166	5.78713	1.0612e-08	1.15147e-07	9.4053
ARMC4	0.972378	0.0383202	5.79553	1.01163e-08	1.1042e-07	9.45126
LONRF3	0.972069	-0.00800316	5.826	8.50065e-09	9.52015e-08	9.61851
ME2	-0.972042	0.0307979	-5.80182	9.75987e-09	1.0712e-07	9.48574
SGTA	-0.970761	-0.0140572	-5.83492	8.07758e-09	9.10034e-08	9.66758
DCLK1	-0.970633	0.0433642	-5.808	9.42199e-09	1.03873e-07	9.5196
ASB7	0.970553	-0.0205941	5.78737	1.05975e-08	1.15147e-07	9.4066
TMEM14A	0.970299	-0.0849408	5.86189	6.91854e-09	7.90942e-08	9.8165
FAM110B	-0.969943	0.0544985	-5.79888	9.92511e-09	1.08616e-07	9.4696
KCNC1	-0.969798	0.0343715	-5.80832	9.40462e-09	1.03873e-07	9.52137
PDCD1LG2	0.969585	0.0102813	5.76699	1.18987e-08	1.27482e-07	9.29533
SLC6A11	-0.969094	0.0543112	-5.78701	1.06193e-08	1.15147e-07	9.40463
KLF5	0.968994	-0.0145573	5.83237	8.19643e-09	9.20028e-08	9.65354
C5orf30	-0.968992	-0.0156372	-5.79881	9.9291e-09	1.08616e-07	9.46921
DCTD	0.968875	0.00645797	5.80565	9.54905e-09	1.0504e-07	9.50672
LUZP1	0.968513	0.0157681	5.81818	8.88947e-09	9.88519e-08	9.57552
ZYX	-0.966987	0.0519036	-5.77535	1.1347e-08	1.22101e-07	9.34094
CAMKV	-0.966596	0.00288176	-5.7614	1.22817e-08	1.3116e-07	9.26489
LSM5	-0.966353	-0.0135456	-5.76468	1.20554e-08	1.29022e-07	9.28276
MYH10	-0.966126	-0.00947423	-5.78421	1.07894e-08	1.16608e-07	9.38936
LRPPRC	-0.96604	-0.0276085	-5.80588	9.53655e-09	1.05019e-07	9.50798
DDOST	0.96573	-0.0704216	5.78938	1.0477e-08	1.14077e-07	9.4176
ZNF696	-0.965631	0.0191291	-5.73461	1.42919e-08	1.49971e-07	9.11928
HES1	-0.965325	0.0508376	-5.79065	1.04012e-08	1.13404e-07	9.42458
ZNF184	-0.964771	-0.0513868	-5.76983	1.17081e-08	1.25576e-07	9.31084
PLCG1	-0.964751	0.0216325	-5.78455	1.07689e-08	1.16594e-07	9.39119
DSP	0.964578	0.0148993	5.74713	1.3315e-08	1.40826e-07	9.18729
RARS	0.964416	-0.048844	5.78443	1.07763e-08	1.16594e-07	9.39053
EMD	0.964192	-0.0384965	5.76145	1.22782e-08	1.3116e-07	9.26517
PPP2R1A	-0.963801	0.0320731	-5.73454	1.42974e-08	1.49971e-07	9.11891
NANS	0.96368	-0.0443585	5.77221	1.1551e-08	1.24025e-07	9.32383
GPR176	0.96331	0.013816	5.75235	1.29281e-08	1.37321e-07	9.21561
CTNNAL1	0.963232	-0.0105372	5.72534	1.50593e-08	1.56759e-07	9.06904
PPIB	0.96303	-0.0402729	5.75	1.31012e-08	1.38989e-07	9.20284
TIMM8B	-0.962864	0.0182513	-5.73625	1.416e-08	1.48966e-07	9.12819
C5orf15	0.962405	-0.0763302	5.78035	1.10294e-08	1.18942e-07	9.36822
RCN3	0.962393	0.0501605	5.73795	1.40246e-08	1.4797e-07	9.13741
BCL2L13	0.962331	-0.0136739	5.73229	1.44798e-08	1.51524e-07	9.10673
FLOT2	-0.961701	-0.00712135	-5.75996	1.23823e-08	1.32091e-07	9.25705
HFE	0.961689	-0.00493787	5.77423	1.14195e-08	1.22747e-07	9.33483
ZNF480	-0.961474	0.0146891	-5.73358	1.43753e-08	1.5059e-07	9.11369
LPAR4	-0.961307	-0.0121817	-5.73055	1.4623e-08	1.52539e-07	9.09728
NPAS2	0.960659	0.0238512	5.73781	1.40354e-08	1.4797e-07	9.13668
SERPINB7	0.960517	0.0193945	5.71488	1.59728e-08	1.65225e-07	9.01249
EPOR	0.960453	-0.00287331	5.73172	1.45266e-08	1.51694e-07	9.10363
EZH2	-0.960423	-0.0342635	-5.73449	1.4301e-08	1.49971e-07	9.11867
LMAN2	0.959481	-0.024237	5.72055	1.54714e-08	1.60543e-07	9.04311
RBMS1	0.959336	-0.00640894	5.73702	1.40985e-08	1.48477e-07	9.13237
KCND3	-0.958643	0.00939872	-5.7472	1.33098e-08	1.40826e-07	9.18766
SLC39A14	0.958572	-0.0758216	5.78389	1.08093e-08	1.16695e-07	9.38759
PTER	0.958281	-0.0130715	5.7759	1.13113e-08	1.2185e-07	9.34397
G6PD	0.958168	-0.0199745	5.70731	1.66683e-08	1.71522e-07	8.97156
LAMB3	0.95809	0.00967756	5.73205	1.44993e-08	1.51568e-07	9.10544
MORF4L2	0.957453	-0.0728062	5.74014	1.3852e-08	1.46348e-07	9.14931
CDC42EP3	0.957196	-0.0382001	5.72032	1.54911e-08	1.60578e-07	9.04189
NNMT	0.957133	0.0135738	5.70659	1.67354e-08	1.72034e-07	8.9677
DHX58	0.957087	-0.00457668	5.69009	1.83603e-08	1.86988e-07	8.87872
LRRFIP2	0.956683	-0.00427772	5.70399	1.69815e-08	1.74382e-07	8.95368
EDIL3	0.956614	-0.0158196	5.75957	1.24098e-08	1.32242e-07	9.25492
SENP7	-0.956505	0.0198396	-5.75612	1.2655e-08	1.3471e-07	9.23612
KLF12	-0.956423	0.0216296	-5.74983	1.31133e-08	1.38989e-07	9.20195
ZNF821	-0.956307	0.0249177	-5.69861	1.75029e-08	1.79178e-07	8.92464
DDX60	0.956124	0.0168214	5.71447	1.60102e-08	1.65438e-07	9.01024
MEGF8	-0.955496	0.0387603	-5.70147	1.72246e-08	1.76695e-07	8.94003
LOXL2	0.955493	0.0189217	5.68882	1.84918e-08	1.88133e-07	8.87187
SMARCD1	-0.955103	-0.0272936	-5.719	1.56067e-08	1.61607e-07	9.03476
HSBP1	-0.954995	-0.00409276	-5.72469	1.5114e-08	1.57067e-07	9.06556
SEC24A	0.954983	-0.0670722	5.71382	1.6069e-08	1.65842e-07	9.00672
SOBP	-0.954582	0.00410849	-5.71366	1.60828e-08	1.65842e-07	9.0059
IDH3A	0.954555	-0.0160055	5.69998	1.73691e-08	1.77993e-07	8.93201
ELK3	0.954485	0.026759	5.72462	1.51206e-08	1.57067e-07	9.06514
CDC34	-0.954026	0.0492207	-5.69652	1.77097e-08	1.8092e-07	8.91337
CCL20	0.953444	0.0214255	5.65554	2.22741e-08	2.23396e-07	8.69323
ENPEP	0.952746	0.017726	5.66921	2.06372e-08	2.08672e-07	8.76649
FAM32A	-0.952058	0.0392059	-5.6644	2.1199e-08	2.13479e-07	8.74072
TFE3	0.952017	-0.0226045	5.69028	1.83407e-08	1.8698e-07	8.87975
THSD4	0.951934	0.0194887	5.71209	1.62254e-08	1.67138e-07	8.99742
RLBP1	-0.951327	-0.0438779	-5.75301	1.28796e-08	1.36953e-07	9.21923
SLC9A1	0.951034	-0.0124136	5.69653	1.77084e-08	1.8092e-07	8.91344
B3GNT2	0.950186	-0.0275701	5.65432	2.24265e-08	2.24697e-07	8.68669
CNR1	-0.949924	0.0311434	-5.66282	2.13879e-08	2.15163e-07	8.7322
DEAF1	-0.949885	0.00061786	-5.66994	2.05531e-08	2.08248e-07	8.77041
RND2	-0.94973	0.0380934	-5.69615	1.77468e-08	1.81112e-07	8.91136
BARD1	-0.949437	0.0252495	-5.66631	2.09746e-08	2.11867e-07	8.75093
EPHB1	-0.949334	0.00328679	-5.6727	2.02384e-08	2.0548e-07	8.78523
EFNA5	0.949264	-0.0091384	5.66599	2.10126e-08	2.12034e-07	8.74919
CDC25A	-0.947855	-0.00374407	-5.64796	2.32355e-08	2.31884e-07	8.65267
SFPQ	-0.947848	-0.0134456	-5.65337	2.25454e-08	2.2566e-07	8.68161
XDH	0.947728	0.00920999	5.62628	2.62148e-08	2.5898e-07	8.5369
USP12	0.947697	0.00261142	5.66536	2.10867e-08	2.12565e-07	8.74581
ALDOA	0.947564	-0.032831	5.64795	2.32377e-08	2.31884e-07	8.65259
DBN1	-0.94756	0.0343922	-5.65826	2.19384e-08	2.20253e-07	8.7078
MKNK1	0.947475	-0.0696238	5.72891	1.47592e-08	1.53797e-07	9.08838
POLR2D	-0.947456	-0.0550402	-5.68139	1.9278e-08	1.9593e-07	8.8319
HIVEP2	0.946336	0.0177169	5.6697	2.05807e-08	2.08314e-07	8.76913
PLA2G16	0.946137	-0.00112502	5.64943	2.30459e-08	2.30436e-07	8.66054
PCDH1	-0.946063	0.0454613	-5.64236	2.39721e-08	2.38491e-07	8.62272
ETHE1	0.945791	-0.0112616	5.6364	2.47805e-08	2.45792e-07	8.59089
SP140L	0.94571	-0.0243642	5.62602	2.62526e-08	2.59094e-07	8.53552
ADNP	-0.944704	-0.0397764	-5.63835	2.45128e-08	2.4338e-07	8.60132
ARMC6	-0.944093	0.0204079	-5.61834	2.73959e-08	2.68768e-07	8.49462
CD40	0.943331	0.0322356	5.61597	2.77585e-08	2.71786e-07	8.482
GPR12	-0.943218	0.0116151	-5.59591	3.10192e-08	3.00146e-07	8.37545
MYT1	-0.94292	0.0333285	-5.60252	2.99051e-08	2.90503e-07	8.41054
TNPO2	-0.942919	0.0421649	-5.62154	2.69135e-08	2.6456e-07	8.51166
CXCL1	0.942761	0.0265801	5.59766	3.07201e-08	2.97835e-07	8.38475
SMPD2	0.94253	-0.0334268	5.63181	2.54212e-08	2.51641e-07	8.5664
TBCB	-0.942393	0.0451674	-5.6252	2.63726e-08	2.60018e-07	8.53114
MT1G	0.942304	0.0304709	5.61985	2.71664e-08	2.66781e-07	8.50269
RASSF7	0.941967	-0.0209868	5.60958	2.87581e-08	2.80462e-07	8.44806
TNFRSF14	0.941639	-0.0348715	5.61476	2.79448e-08	2.73339e-07	8.47559
NID1	0.941517	0.0091585	5.64601	2.349e-08	2.33931e-07	8.64222
TNFAIP3	0.941511	-0.0245096	5.63346	2.51896e-08	2.49599e-07	8.57518
SAR1B	0.94151	-0.0568533	5.66151	2.15445e-08	2.16518e-07	8.7252
HDHD3	0.941395	-0.0161763	5.60922	2.88156e-08	2.80746e-07	8.44615
TMED3	0.941324	-0.0305287	5.62844	2.59024e-08	2.56149e-07	8.54841
NFIB	-0.941294	-0.0234148	-5.61096	2.85397e-08	2.78607e-07	8.45537
SLIT2	0.940374	0.0111118	5.59774	3.07061e-08	2.97835e-07	8.38519
FAM168B	-0.940304	0.00164744	-5.58494	3.2957e-08	3.16113e-07	8.31733
CORO2B	-0.940026	0.0448263	-5.61122	2.84981e-08	2.78476e-07	8.45677
RBM4B	-0.939771	0.0346961	-5.60502	2.94936e-08	2.86786e-07	8.42384
PRDX2	-0.939683	0.0338713	-5.58765	3.24672e-08	3.12231e-07	8.33169
UBA6	0.93958	0.00205407	5.57987	3.38911e-08	3.23503e-07	8.29052
SLC22A17	-0.939433	0.0437635	-5.64635	2.34452e-08	2.3372e-07	8.64405
ZNF235	-0.939262	-0.00766024	-5.59108	3.18579e-08	3.07659e-07	8.34986
ELOVL4	0.938986	-0.0112707	5.62344	2.66305e-08	2.62039e-07	8.52181
RAB11FIP1	0.938469	-0.0398455	5.67029	2.05126e-08	2.08051e-07	8.77231
NME4	-0.93774	0.0543505	-5.64136	2.41059e-08	2.39581e-07	8.61738
IDH2	-0.9376	-0.0112403	-5.62496	2.64069e-08	2.60097e-07	8.5299
NUCKS1	-0.937507	0.0230241	-5.57453	3.49042e-08	3.31892e-07	8.26227
RPRD1A	-0.93735	0.00346984	-5.58432	3.30686e-08	3.16569e-07	8.31409
ARF6	0.936611	-0.0370552	5.56976	3.58322e-08	3.40062e-07	8.23711
MTMR11	0.936353	0.0355173	5.58115	3.36532e-08	3.21853e-07	8.29728
FZD6	0.936162	0.0317784	5.58774	3.2451e-08	3.12231e-07	8.33217
CXCL3	0.936055	0.0219139	5.56892	3.59978e-08	3.41306e-07	8.23269
SCN1A	-0.936039	0.00598211	-5.59717	3.08026e-08	2.98342e-07	8.38218
TRIM37	-0.935855	0.0271564	-5.5886	3.22971e-08	3.11367e-07	8.33673
KCNJ16	-0.935806	0.0397316	-5.56478	3.68276e-08	3.48172e-07	8.21083
RNF6	0.935283	-0.00895816	5.57919	3.40186e-08	3.24407e-07	8.28692
MAGI1	-0.934758	0.0357231	-5.61671	2.76446e-08	2.70939e-07	8.48595
SAMD9	0.934701	0.00169044	5.56117	3.75666e-08	3.53806e-07	8.19178
NAT1	0.934668	-0.0560127	5.59344	3.14449e-08	3.03967e-07	8.36238
PCSK1N	-0.934666	0.0541985	-5.60612	2.93148e-08	2.85329e-07	8.42967
ELMO1	-0.934347	0.0402655	-5.56287	3.72175e-08	3.51523e-07	8.20073
MAP7	0.933957	0.009499	5.55349	3.9187e-08	3.68015e-07	8.15129
RGS6	-0.933925	0.0227981	-5.57595	3.46318e-08	3.29619e-07	8.26979
ETV1	-0.93391	0.0432127	-5.55291	3.93111e-08	3.6883e-07	8.14826
MAPK9	0.933318	-0.0386434	5.56135	3.75303e-08	3.53801e-07	8.19271
USP53	0.933227	-0.00883509	5.53663	4.29835e-08	3.96885e-07	8.06263
TRIP11	0.933155	-0.0529353	5.55992	3.78265e-08	3.55915e-07	8.18517
PCDH17	-0.932684	-0.000602966	-5.57164	3.54638e-08	3.36889e-07	8.24702
TESK2	0.932364	-0.00526316	5.54925	4.01082e-08	3.75597e-07	8.12901
GDPD2	-0.932361	0.0119812	-5.57891	3.40715e-08	3.24598e-07	8.28543
STYK1	0.932319	-0.00783134	5.54627	4.0771e-08	3.80722e-07	8.11329
MYL9	0.932249	0.00553125	5.54247	4.16293e-08	3.87274e-07	8.09332
MAP3K3	0.932099	-0.062035	5.57996	3.38734e-08	3.23503e-07	8.29102
QDPR	-0.931942	0.0117559	-5.54723	4.05562e-08	3.79074e-07	8.11836
TBC1D8B	0.931823	-0.0373486	5.56622	3.65373e-08	3.4609e-07	8.21842
PROM1	-0.931587	-0.013235	-5.55618	3.86111e-08	3.62951e-07	8.16548
RANBP3	-0.931252	0.0185167	-5.52285	4.63486e-08	4.2439e-07	7.99037
AGAP2	-0.930914	0.0767754	-5.58468	3.3004e-08	3.16256e-07	8.31596
MGLL	0.930759	-0.0214375	5.55269	3.93598e-08	3.68937e-07	8.14707
PSPC1	-0.930725	-0.0405439	-5.56183	3.74314e-08	3.53205e-07	8.19524
LBR	-0.930407	-0.0329969	-5.53699	4.28984e-08	3.96556e-07	8.06453
STX7	0.930194	-0.0311715	5.52995	4.45843e-08	4.09752e-07	8.02758
SPEN	-0.929931	0.0107266	-5.54537	4.09719e-08	3.82237e-07	8.10858
OSBPL3	0.929845	0.0547847	5.58856	3.23048e-08	3.11367e-07	8.3365
ILF3	-0.929823	0.00361519	-5.53413	4.35747e-08	4.01594e-07	8.04953
DKK1	0.928753	0.00409336	5.54217	4.16979e-08	3.87547e-07	8.09174
GDAP1	-0.928589	-0.0114679	-5.54753	4.04892e-08	3.78806e-07	8.11994
RUNDC3A	-0.928404	0.054103	-5.52677	4.53659e-08	4.16162e-07	8.01092
ERI3	-0.92833	0.00736553	-5.50892	5.00115e-08	4.52069e-07	7.91747
CDH6	-0.928133	0.0377257	-5.53385	4.36409e-08	4.0183e-07	8.04808
B3GALT4	0.928129	-0.00148685	5.51608	4.80937e-08	4.37533e-07	7.95495
H2AFV	-0.928016	-0.00502543	-5.51666	4.79424e-08	4.36558e-07	7.95797
DCAKD	-0.926941	0.0536597	-5.53695	4.29077e-08	3.96556e-07	8.06432
PROX1	-0.926001	0.0181864	-5.52798	4.50671e-08	4.13806e-07	8.01725
MEF2D	0.925929	0.0242925	5.5375	4.27788e-08	3.96105e-07	8.0672
DERL1	0.925755	0.00502403	5.56563	3.66565e-08	3.46887e-07	8.2153
ATP8B2	0.925733	-0.0482438	5.54084	4.20028e-08	3.90015e-07	8.08475
DDX25	-0.92571	0.031327	-5.50992	4.9739e-08	4.50842e-07	7.92271
BAZ2B	-0.925661	0.0235636	-5.51688	4.7886e-08	4.36558e-07	7.9591
PI4K2A	0.925606	-0.0845859	5.58753	3.24892e-08	3.12231e-07	8.33104
ABHD8	0.925355	-0.00248747	5.53813	4.26313e-08	3.95371e-07	8.07052
ZNF175	-0.925173	0.0415118	-5.51667	4.794e-08	4.36558e-07	7.95801
PELI1	-0.924824	-0.0235407	-5.52376	4.61199e-08	4.22687e-07	7.99511
NFAT5	0.924787	0.00762991	5.51229	4.91014e-08	4.45932e-07	7.93507
CTSS	0.924639	0.00123242	5.50074	5.22922e-08	4.70535e-07	7.87473
CHAC1	0.924496	-0.077895	5.58613	3.27408e-08	3.14344e-07	8.32364
PLA2R1	0.924391	0.0106796	5.50425	5.13014e-08	4.6246e-07	7.89306
PPM1F	0.924153	0.000725649	5.54455	4.11561e-08	3.83593e-07	8.10428
C11orf68	0.923954	0.0531501	5.51969	4.71566e-08	4.3099e-07	7.97381
CALHM2	0.923684	-0.0140047	5.50551	5.09486e-08	4.60025e-07	7.89968
TAPBPL	0.923657	0.00395343	5.48652	5.64965e-08	5.03781e-07	7.80063
PRRG4	0.923237	-0.0140085	5.49273	5.46222e-08	4.8839e-07	7.83296
ARAP1	0.923052	-0.0119703	5.48606	5.66379e-08	5.04588e-07	7.79823
SLC3A2	0.922668	-0.0496624	5.50538	5.09847e-08	4.60025e-07	7.899
ULBP1	0.922551	0.0380202	5.48915	5.56959e-08	4.97091e-07	7.8143
GRIA3	-0.922502	0.0496323	-5.50342	5.15349e-08	4.64143e-07	7.88871
TUBA4A	0.922454	-0.0274235	5.50955	4.984e-08	4.51344e-07	7.92076
NRP1	0.922409	-0.0231031	5.51088	4.94785e-08	4.48893e-07	7.92774
FOSB	0.922359	-0.0471276	5.53616	4.30944e-08	3.97538e-07	8.06016
CREB3L2	0.922076	-0.0650244	5.54326	4.1448e-08	3.8595e-07	8.0975
H2AFX	-0.922022	0.0289585	-5.47499	6.01482e-08	5.31077e-07	7.74061
LPL	-0.921292	-0.00342685	-5.51226	4.91071e-08	4.45932e-07	7.93496
GOLGA4	0.921254	-0.0296257	5.47539	6.00171e-08	5.30867e-07	7.74271
PABPN1	-0.921252	-0.0312376	-5.49928	5.27099e-08	4.73862e-07	7.86711
GFOD2	-0.921156	0.049975	-5.4949	5.39814e-08	4.83973e-07	7.84426
TIMP4	-0.920431	0.0399336	-5.49198	5.48439e-08	4.89929e-07	7.82907
RGS4	0.919911	0.00639374	5.45558	6.68139e-08	5.81622e-07	7.63993
ZNF74	-0.91927	-0.0127084	-5.51933	4.72483e-08	4.31429e-07	7.97195
CKAP5	-0.919269	0.0476691	-5.50925	4.9922e-08	4.51673e-07	7.91918
REV1	-0.919219	0.00536887	-5.45055	6.86576e-08	5.95052e-07	7.61386
EDNRA	0.919149	0.00216331	5.49514	5.39116e-08	4.83786e-07	7.8455
PCLO	0.918971	-0.0453248	5.53064	4.44161e-08	4.08587e-07	8.0312
RBM10	-0.918933	-0.0300268	-5.53801	4.26596e-08	3.95371e-07	8.06988
PTPN14	0.91858	-0.0333974	5.45989	6.52771e-08	5.70756e-07	7.66222
PORCN	0.918486	-0.0312832	5.49719	5.33109e-08	4.7883e-07	7.85624
PML	0.918448	-0.0112661	5.47339	6.06723e-08	5.35226e-07	7.7323
EPHA2	0.918116	0.0122598	5.49274	5.46186e-08	4.8839e-07	7.83302
ZNF652	-0.918008	-0.0241157	-5.48263	5.77053e-08	5.13172e-07	7.78034
BDNF	0.917993	0.0193937	5.46183	6.45954e-08	5.65296e-07	7.67228
LPP	0.917938	0.0242	5.49325	5.44676e-08	4.8789e-07	7.83567
PGBD5	-0.91767	-5.69075e-05	-5.52055	4.69353e-08	4.29365e-07	7.97831
SFT2D2	0.917536	0.0167045	5.45188	6.81656e-08	5.91307e-07	7.62074
ZNF287	-0.917451	0.0278893	-5.46751	6.26367e-08	5.50101e-07	7.70178
SPINT1	0.917372	-0.00356329	5.47269	6.09024e-08	5.35822e-07	7.72868
BCL9	-0.917103	-0.012877	-5.45694	6.63242e-08	5.78822e-07	7.64698
VAX2	-0.916776	0.023355	-5.47624	5.97427e-08	5.28912e-07	7.7471
TRIP10	0.91647	0.0182342	5.48314	5.7546e-08	5.12216e-07	7.78299
LAMP3	0.916347	0.00433296	5.44604	7.03495e-08	6.05471e-07	7.59054
PYGB	0.915945	0.0245088	5.44975	6.89535e-08	5.9605e-07	7.60974
NOL4	-0.915851	0.0367524	-5.43625	7.4166e-08	6.36104e-07	7.53994
COQ10B	0.915732	0.0171198	5.4568	6.63751e-08	5.78822e-07	7.64624
EXT2	0.91573	0.017664	5.46279	6.42603e-08	5.62861e-07	7.67726
EIF4ENIF1	-0.915542	0.0144213	-5.47322	6.07285e-08	5.35245e-07	7.73142
ACTN2	-0.91545	0.0453914	-5.45712	6.62625e-08	5.78822e-07	7.64787
APPBP2	-0.9152	-0.000356907	-5.45624	6.65774e-08	5.80074e-07	7.64333
TSPAN4	0.915061	0.00612454	5.48075	5.8295e-08	5.17486e-07	7.7706
F2RL1	0.915056	0.00795857	5.44865	6.9365e-08	5.98287e-07	7.60404
GAL3ST4	-0.914524	0.0390043	-5.45012	6.88168e-08	5.95823e-07	7.61164
SPINK2	0.914426	-0.0086046	5.42825	7.74325e-08	6.60682e-07	7.49867
CAPRIN1	-0.914224	-0.0262034	-5.45494	6.70476e-08	5.82823e-07	7.63659
ROR2	0.914003	-0.000237294	5.44672	7.00946e-08	6.03802e-07	7.59402
MAGT1	0.913994	-0.0599334	5.46679	6.28826e-08	5.51771e-07	7.69802
FYCO1	0.913626	-0.0494819	5.47275	6.08816e-08	5.35822e-07	7.729
TRPV2	0.913411	-0.012196	5.43587	7.43181e-08	6.36856e-07	7.53798
PSMB8	0.913327	-0.0224746	5.42435	7.90775e-08	6.70666e-07	7.47854
SLC25A46	0.913258	-0.0258791	5.43893	7.31044e-08	6.27543e-07	7.55375
PURG	-0.91281	-0.00224746	-5.44892	6.92654e-08	5.98223e-07	7.60541
HSPA1L	0.912676	0.00771907	5.43287	7.55319e-08	6.45579e-07	7.52246
NTAN1	0.912562	0.00814798	5.45307	6.77287e-08	5.88033e-07	7.6269
PIK3R3	-0.912557	-0.010487	-5.42739	7.77946e-08	6.63199e-07	7.4942
CLIP3	-0.912295	0.0619624	-5.48086	5.8262e-08	5.17486e-07	7.77114
ME3	0.912169	-0.00605077	5.44128	7.21816e-08	6.2016e-07	7.56592
TBCCD1	-0.911978	-0.0332462	-5.4265	7.81666e-08	6.64651e-07	7.48963
PRRC1	0.911768	-0.0378631	5.44858	6.93938e-08	5.98287e-07	7.60364
PSMD5	0.911489	0.0100244	5.43549	7.44732e-08	6.37632e-07	7.53598
SH3BP5	0.911263	0.0197167	5.47512	6.01044e-08	5.31077e-07	7.74131
SLC48A1	-0.910516	0.00650914	-5.41907	8.13565e-08	6.85877e-07	7.45133
FLRT1	-0.910438	-0.00931631	-5.42711	7.79107e-08	6.63616e-07	7.49277
GCC2	0.910411	-0.0476765	5.42393	7.92568e-08	6.71611e-07	7.47637
TMEM185B	0.910265	0.0164261	5.42053	8.07194e-08	6.81669e-07	7.45886
VGF	-0.91024	0.0495028	-5.41525	8.30443e-08	6.9832e-07	7.43167
CYTH2	-0.910096	0.0355233	-5.43324	7.53794e-08	6.44833e-07	7.5244
GPN2	0.910073	-0.0156361	5.40469	8.78878e-08	7.36544e-07	7.37739
RPP25	0.909885	0.0255125	5.39641	9.18767e-08	7.65432e-07	7.3349
PJA2	-0.909879	0.0400481	-5.46981	6.18608e-08	5.43771e-07	7.71372
TRIM13	-0.909873	0.0624984	-5.41555	8.29074e-08	6.97762e-07	7.43325
SLC27A5	-0.909818	0.00527123	-5.42443	7.90408e-08	6.70666e-07	7.47898
PLD1	0.909753	-0.0962151	5.48019	5.84753e-08	5.18621e-07	7.76764
RIN1	0.90915	0.0466463	5.44999	6.8867e-08	5.95823e-07	7.61094
HIPK3	0.909103	0.00205768	5.40202	8.91549e-08	7.45899e-07	7.36369
GAB2	-0.908395	-0.0108192	-5.42436	7.90709e-08	6.70666e-07	7.47861
CBX2	-0.908309	0.0138801	-5.39438	9.2878e-08	7.71824e-07	7.32452
PPP2R3C	-0.908048	-0.0400413	-5.40093	8.9676e-08	7.48992e-07	7.35811
ZNF334	-0.907847	-0.0387428	-5.39502	9.25621e-08	7.69846e-07	7.32779
SMAD7	0.907728	-0.0179352	5.40691	8.6845e-08	7.28423e-07	7.38882
LUC7L	-0.907657	0.0102137	-5.43047	7.65142e-08	6.5341e-07	7.51009
ACAD8	-0.907532	-0.00638922	-5.38206	9.92116e-08	8.16226e-07	7.26138
CSTF3	-0.907352	0.0491465	-5.42669	7.80873e-08	6.64549e-07	7.4906
RAB11FIP2	0.907328	-0.042737	5.39376	9.31877e-08	7.73747e-07	7.32134
TLN1	0.906989	-0.0248914	5.38333	9.85351e-08	8.11336e-07	7.26793
AHR	0.906569	0.00806352	5.41685	8.23308e-08	6.935e-07	7.43993
TMEM184B	0.906217	0.0249378	5.39533	9.24085e-08	7.69215e-07	7.32938
COL13A1	0.906102	0.00163145	5.41921	8.12934e-08	6.85877e-07	7.45207
SAR1A	0.905779	-0.0269002	5.39139	9.43782e-08	7.8138e-07	7.30919
CMAS	0.90553	0.0199534	5.3795	1.00575e-07	8.25383e-07	7.24832
POMT2	-0.904801	0.0175527	-5.3913	9.4423e-08	7.8138e-07	7.30873
ZBTB5	-0.904581	0.00842393	-5.38625	9.7011e-08	8.00118e-07	7.28285
PSD4	0.904554	-0.03122	5.40942	8.56849e-08	7.19302e-07	7.4017
RAP2A	-0.904485	-0.0201034	-5.42215	8.00194e-08	6.76913e-07	7.4672
FLI1	0.904461	-0.0400891	5.4792	5.87888e-08	5.20934e-07	7.76252
MYO1E	0.904359	-0.0690553	5.45488	6.70697e-08	5.82823e-07	7.63627
ONECUT2	-0.904179	-0.0159181	-5.40223	8.90545e-08	7.4569e-07	7.36477
ARHGAP10	0.904122	-0.0544559	5.38912	9.55327e-08	7.88583e-07	7.29755
HNRNPA0	-0.904073	-0.00869785	-5.37863	1.01046e-07	8.27872e-07	7.24385
DYRK3	0.904016	-0.00299867	5.3734	1.03905e-07	8.50595e-07	7.21714
UNC13A	-0.903341	0.0581534	-5.39665	9.176e-08	7.65105e-07	7.33612
CYTH3	0.903258	0.0243407	5.39355	9.32963e-08	7.73999e-07	7.32022
SNX27	-0.902984	0.0924402	-5.41303	8.4037e-08	7.06068e-07	7.42029
BMPR1A	-0.90282	-0.0115178	-5.36573	1.08246e-07	8.81021e-07	7.17797
ZFP37	-0.902746	0.0488216	-5.39161	9.42685e-08	7.8138e-07	7.3103
HPSE	0.902691	0.0161247	5.35172	1.1663e-07	9.4228e-07	7.10659
NDUFS3	-0.902545	0.0304875	-5.3848	9.77663e-08	8.05676e-07	7.27543
ARF4	0.90232	-0.0398362	5.37863	1.01045e-07	8.27872e-07	7.24386
LRRN2	-0.902223	0.0418962	-5.38177	9.93627e-08	8.1679e-07	7.25992
MRPL2	0.902198	-0.0825725	5.46282	6.42501e-08	5.62861e-07	7.67741
DRAM1	0.901965	0.0712837	5.42077	8.06139e-08	6.8136e-07	7.46011
BTC	0.901965	-0.0312086	5.42215	8.00172e-08	6.76913e-07	7.46722
EXPH5	0.901721	0.0209798	5.34413	1.21432e-07	9.76292e-07	7.06798
ATP2A2	-0.901652	-0.0198134	-5.36489	1.08733e-07	8.83537e-07	7.17367
EFHD2	0.901373	0.0128019	5.3908	9.46763e-08	7.82821e-07	7.30617
CCNB1IP1	-0.901353	-0.00177725	-5.3807	9.99301e-08	8.20772e-07	7.25447
CPA4	0.901259	0.00212066	5.36924	1.0624e-07	8.65411e-07	7.19587
CD59	0.901203	0.0323887	5.39842	9.08937e-08	7.58521e-07	7.3452
HSD17B14	0.900881	-0.00759133	5.37026	1.05663e-07	8.61423e-07	7.20108
HDAC7	0.900614	0.0080536	5.35475	1.14765e-07	9.27976e-07	7.12201
MEIS1	-0.900486	0.00100477	-5.33766	1.25673e-07	1.00793e-06	7.03514
B4GALT7	0.900453	-0.0126056	5.37116	1.05155e-07	8.58696e-07	7.20569
OGFRL1	0.900141	-0.0716777	5.40176	8.92789e-08	7.46305e-07	7.36236
COL3A1	0.900138	0.0260016	5.33291	1.28883e-07	1.03033e-06	7.01101
YEATS4	-0.9	-0.0103392	-5.34453	1.21171e-07	9.75587e-07	7.07004
RHOG	0.899818	-0.00315626	5.36505	1.08641e-07	8.83513e-07	7.17448
DNM3	-0.899632	-0.0079009	-5.36043	1.11345e-07	9.01791e-07	7.15096
HMGB3	-0.899181	0.00556757	-5.3703	1.05637e-07	8.61423e-07	7.20132
NDE1	-0.899166	-0.015348	-5.34442	1.21246e-07	9.75587e-07	7.06945
EDEM2	0.899124	0.00718251	5.34605	1.20197e-07	9.70313e-07	7.07776
GCH1	0.898912	-0.0926456	5.44474	7.08472e-08	6.09224e-07	7.58379
NLK	-0.898298	-0.00262856	-5.3357	1.26992e-07	1.01686e-06	7.02515
ADD2	-0.898198	0.0474344	-5.37313	1.04055e-07	8.51119e-07	7.21576
PHF1	0.897306	-0.0273332	5.36055	1.11273e-07	9.01791e-07	7.15158
PCYT1A	0.897234	-0.0352264	5.36248	1.10139e-07	8.93493e-07	7.16138
ETS2	0.897172	-0.0156995	5.36437	1.09034e-07	8.85249e-07	7.17103
CASP6	0.897167	-0.0311736	5.33945	1.24486e-07	9.99223e-07	7.04422
FADS3	0.896915	-0.0193693	5.34525	1.20709e-07	9.73647e-07	7.0737
FAM57A	-0.896505	0.000245363	-5.33179	1.29647e-07	1.03561e-06	7.00536
ARGLU1	-0.896428	-0.0153718	-5.34461	1.21123e-07	9.75587e-07	7.07042
PYCARD	0.89577	-0.0153233	5.33993	1.24169e-07	9.97486e-07	7.04666
MLLT11	-0.895653	0.043793	-5.35637	1.13778e-07	9.20743e-07	7.13028
IFT81	-0.895371	0.00541378	-5.33441	1.27862e-07	1.023e-06	7.01862
PIAS2	-0.895258	0.0135065	-5.30507	1.49335e-07	1.18142e-06	6.87013
IL17RB	-0.895208	-0.0131749	-5.33734	1.25886e-07	1.00882e-06	7.03352
LMO1	-0.894552	0.012374	-5.32698	1.32998e-07	1.06151e-06	6.98095
TPMT	0.894112	-0.0907392	5.3893	9.5441e-08	7.88485e-07	7.29847
CAND2	-0.893893	0.00918287	-5.32653	1.33312e-07	1.06316e-06	6.97869
GADD45G	-0.893724	0.0325549	-5.31518	1.41571e-07	1.12269e-06	6.92119
SERPINA1	0.893579	0.0168853	5.28743	1.63889e-07	1.28322e-06	6.7812
CTSA	0.893319	-0.0529213	5.32076	1.37453e-07	1.09355e-06	6.94943
MMP16	-0.893168	0.014359	-5.30165	1.52055e-07	1.20102e-06	6.85287
F11R	0.892992	-0.0535463	5.32387	1.35209e-07	1.07655e-06	6.96518
NCOA1	-0.892371	0.0567751	-5.31799	1.39482e-07	1.1079e-06	6.93541
NTSR1	0.892089	-0.0199584	5.37231	1.04513e-07	8.54153e-07	7.21156
ACSL5	0.891411	-0.0118034	5.29492	1.57549e-07	1.23946e-06	6.81893
KIF26B	0.8914	-0.0257663	5.3014	1.52256e-07	1.20164e-06	6.85161
ADCY1	-0.890454	0.0504222	-5.32461	1.34678e-07	1.07319e-06	6.96894
FGF5	0.890388	0.00661548	5.30367	1.50443e-07	1.18924e-06	6.86306
PLCD1	0.889673	0.0125519	5.28293	1.67812e-07	1.31103e-06	6.75859
SOX21	-0.889371	0.0145577	-5.31889	1.3882e-07	1.10353e-06	6.93996
KCNN2	-0.889255	0.0345284	-5.28794	1.6345e-07	1.28079e-06	6.78377
ITGB4	0.888969	0.00492453	5.26721	1.82259e-07	1.40771e-06	6.67964
RAB27B	0.888967	0.0399792	5.29532	1.57219e-07	1.23883e-06	6.82094
LYN	0.888948	0.0060936	5.30064	1.52866e-07	1.2055e-06	6.84778
C12orf43	-0.888879	-0.0230695	-5.31214	1.43864e-07	1.13996e-06	6.90583
MAN2A1	0.888618	-0.037339	5.2829	1.67839e-07	1.31103e-06	6.75844
MAP2K5	-0.888488	0.011079	-5.27454	1.75384e-07	1.36243e-06	6.7164
ARAF	0.888256	-0.0503553	5.30786	1.47149e-07	1.16506e-06	6.88424
ACTN4	0.887614	0.0266303	5.27765	1.72541e-07	1.34245e-06	6.73202
HMGA1	0.887609	-0.0231403	5.29459	1.57821e-07	1.24061e-06	6.81728
MCTP2	0.887554	-0.0226437	5.27895	1.71362e-07	1.33538e-06	6.73857
LMO2	-0.887201	0.0294162	-5.28974	1.61908e-07	1.26971e-06	6.79283
JAK1	0.88693	0.0353649	5.27305	1.76761e-07	1.37097e-06	6.70892
CAMTA2	0.886522	-0.0021815	5.27919	1.71149e-07	1.33477e-06	6.73977
STC2	0.886409	-0.0110909	5.31625	1.40774e-07	1.11726e-06	6.9266
VAMP4	0.886241	0.0342318	5.29109	1.60759e-07	1.2617e-06	6.79964
FJX1	-0.886061	0.0443031	-5.29507	1.57421e-07	1.23944e-06	6.81971
STRN4	-0.885418	0.0490382	-5.2716	1.78115e-07	1.37931e-06	6.70163
PDLIM1	0.885349	-0.00374024	5.2711	1.78582e-07	1.38184e-06	6.69912
MAPK10	-0.885318	0.0449435	-5.26712	1.82352e-07	1.40771e-06	6.67915
VILL	0.885301	0.0285248	5.27054	1.79101e-07	1.38478e-06	6.69635
CAPN1	0.884676	0.0502422	5.27482	1.75121e-07	1.36146e-06	6.71783
ABCC2	0.884575	0.0107386	5.26005	1.89234e-07	1.45742e-06	6.64374
SECISBP2	-0.884214	0.0335229	-5.23964	2.10557e-07	1.61161e-06	6.54169
TMEM59	0.884199	-0.0636087	5.27792	1.72291e-07	1.34156e-06	6.73341
KYNU	0.883821	0.00204946	5.26198	1.87328e-07	1.44387e-06	6.65342
GYG2	-0.88351	0.0509092	-5.27382	1.76042e-07	1.36647e-06	6.71281
YLPM1	-0.883369	0.00853959	-5.2277	2.24086e-07	1.70854e-06	6.48219
FOXL1	0.882909	0.0306958	5.26496	1.84423e-07	1.42259e-06	6.66835
TOMM34	0.882588	-0.0118218	5.25716	1.92122e-07	1.47851e-06	6.62926
PDK4	0.882519	-0.00320677	5.22627	2.25765e-07	1.7187e-06	6.47506
ADM	0.882351	0.0280121	5.28359	1.67237e-07	1.30839e-06	6.76187
XYLT2	0.881834	0.0469811	5.24171	2.08295e-07	1.59553e-06	6.55201
HLA-C	0.881782	-0.0289916	5.2433	2.06572e-07	1.58356e-06	6.55995
SNED1	0.881755	-0.0100751	5.23722	2.13231e-07	1.62829e-06	6.52964
CRABP2	0.881389	0.0292422	5.25258	1.96786e-07	1.51088e-06	6.60634
DPYSL2	-0.881314	0.00496209	-5.27198	1.7776e-07	1.37764e-06	6.70353
LRRC3	0.881227	0.0184477	5.22346	2.29098e-07	1.73872e-06	6.46105
SAP130	-0.880344	0.0368442	-5.24482	2.04935e-07	1.57223e-06	6.56756
NTHL1	-0.880268	0.0159936	-5.25355	1.95786e-07	1.50437e-06	6.6112
SRPK2	-0.879883	0.00606282	-5.20919	2.46745e-07	1.8548e-06	6.39016
ZNF580	-0.879645	-0.0127116	-5.21849	2.35107e-07	1.77614e-06	6.43632
THBD	0.879573	0.0157848	5.2186	2.34972e-07	1.77614e-06	6.43687
ITGB5	0.879555	-0.064078	5.23932	2.10913e-07	1.61309e-06	6.54008
OSBPL9	0.879351	-0.0488393	5.23885	2.11424e-07	1.61574e-06	6.53777
WDR6	-0.879025	-0.0306078	-5.22555	2.26619e-07	1.72123e-06	6.47145
LTBR	0.878657	-0.0214913	5.25454	1.94772e-07	1.49774e-06	6.61617
SOCS1	0.878599	-0.039043	5.28225	1.68415e-07	1.31449e-06	6.75516
PHC2	-0.878587	0.0179551	-5.22082	2.32262e-07	1.76003e-06	6.44795
SNX7	0.877403	-0.0218346	5.21949	2.33877e-07	1.77091e-06	6.44133
ETFDH	0.877176	-0.0320897	5.20087	2.57645e-07	1.92873e-06	6.34887
FBXL2	0.876978	0.00847497	5.22572	2.26419e-07	1.72103e-06	6.47229
SLC37A1	0.875887	0.0229813	5.20913	2.46831e-07	1.8548e-06	6.38983
SLC17A5	0.875772	-0.0698971	5.22611	2.25959e-07	1.71885e-06	6.47423
RPS6KB2	0.875725	-0.0238449	5.22753	2.24286e-07	1.70876e-06	6.48134
PNPLA6	0.875559	0.0178308	5.18887	2.74175e-07	2.04473e-06	6.28948
SF3B3	-0.875503	-0.0263031	-5.19623	2.63923e-07	1.97125e-06	6.32588
TMCC1	-0.875089	-0.0161693	-5.20713	2.49407e-07	1.87273e-06	6.37991
INPP5K	0.874915	0.0270553	5.22294	2.2972e-07	1.7421e-06	6.45846
OTUD4	0.874882	-0.0291198	5.2131	2.41793e-07	1.82387e-06	6.40953
TGFBRAP1	-0.874686	-0.00409138	-5.23003	2.21388e-07	1.68928e-06	6.49376
IGFBP2	-0.874437	-0.0105117	-5.21739	2.36451e-07	1.78493e-06	6.43087
ING4	-0.874389	0.0141177	-5.19761	2.62039e-07	1.95866e-06	6.33272
MSX2	0.874201	0.00513611	5.18128	2.85171e-07	2.12034e-06	6.25193
IL17RA	0.874111	0.0132017	5.1872	2.76565e-07	2.06101e-06	6.28119
CCND3	0.874074	-0.108879	5.29382	1.58461e-07	1.24466e-06	6.81341
ARNTL2	0.873899	-0.0235494	5.21155	2.43749e-07	1.83722e-06	6.40183
SATB2	-0.873448	0.0505227	-5.19916	2.59937e-07	1.94442e-06	6.34041
CPSF4	-0.873178	0.0178044	-5.20977	2.46015e-07	1.85147e-06	6.39299
OAZ1	0.872621	-0.00262941	5.20331	2.54409e-07	1.90739e-06	6.36094
FKBP2	0.87207	0.038674	5.19319	2.68107e-07	2.00099e-06	6.31085
UPF3A	-0.871848	0.00462808	-5.17529	2.94132e-07	2.18369e-06	6.22238
GMPPA	0.87171	0.0181692	5.1701	3.02124e-07	2.23463e-06	6.19678
SGSM2	-0.871608	-0.0102423	-5.16481	3.10484e-07	2.28791e-06	6.17072
FOXL2	0.870695	0.0394792	5.17108	3.00605e-07	2.22673e-06	6.20159
NXPH3	-0.870656	0.0310513	-5.16821	3.05093e-07	2.25322e-06	6.18744
TOX3	-0.870516	0.0201038	-5.15921	3.19585e-07	2.33583e-06	6.14314
CDC42EP2	0.870459	-0.0171099	5.16835	3.04869e-07	2.25322e-06	6.18815
RIT2	-0.870429	0.0439353	-5.15303	3.29918e-07	2.40248e-06	6.11276
ATMIN	-0.870416	-0.0127451	-5.15642	3.24203e-07	2.36434e-06	6.12944
EZR	0.87036	-0.0398766	5.16098	3.1667e-07	2.31967e-06	6.15188
SLC1A2	-0.869747	0.0385683	-5.16428	3.11329e-07	2.29243e-06	6.16813
CYP11A1	0.869292	0.000426497	5.15714	3.23001e-07	2.35731e-06	6.13299
IFRD2	0.869216	-0.0160398	5.1615	3.15837e-07	2.31871e-06	6.1544
TRIM36	-0.869103	0.0778027	-5.21882	2.347e-07	1.77578e-06	6.43797
SLC35F2	0.86907	0.014084	5.20272	2.55185e-07	1.91176e-06	6.35803
AGRN	-0.868752	0.0184291	-5.15975	3.18693e-07	2.33104e-06	6.14581
CSGALNACT1	-0.868744	0.040602	-5.16115	3.16405e-07	2.31967e-06	6.15268
PLAC8	0.868715	0.00804294	5.15091	3.33527e-07	2.42518e-06	6.10237
PLCB1	-0.868304	-0.00460603	-5.18346	2.81966e-07	2.09809e-06	6.26272
LRRN3	-0.868241	-0.00411116	-5.17396	2.96165e-07	2.19548e-06	6.2158
EVI2A	0.868195	-0.0479742	5.20999	2.45727e-07	1.85072e-06	6.39411
SETDB1	-0.868069	-0.00412397	-5.16308	3.13268e-07	2.30499e-06	6.1622
FBXO46	-0.867941	0.0101563	-5.16101	3.16622e-07	2.31967e-06	6.15203
GNAO1	-0.867537	0.0244478	-5.18415	2.80956e-07	2.09215e-06	6.26615
NUDT11	-0.867296	0.0439538	-5.17459	2.95198e-07	2.18996e-06	6.21893
GRIK3	-0.867269	-0.0459764	-5.1778	2.90337e-07	2.15713e-06	6.23478
COPZ2	0.867043	-0.0360417	5.15739	3.22584e-07	2.35601e-06	6.13422
NPTN	0.866533	-0.00670949	5.15186	3.31904e-07	2.41515e-06	6.10703
STX5	0.866077	-0.0016102	5.1708	3.01034e-07	2.22824e-06	6.20023
ZNF34	-0.86604	0.0479611	-5.1549	3.26751e-07	2.38117e-06	6.12197
ZBTB7B	0.865402	-0.00675294	5.1439	3.45779e-07	2.50785e-06	6.06794
SLC14A1	0.865394	-0.0115284	5.12912	3.73031e-07	2.677e-06	5.99553
MTMR9	-0.865081	0.0427464	-5.15994	3.18379e-07	2.33046e-06	6.14675
ZNF14	-0.865077	0.0312401	-5.13555	3.6093e-07	2.60718e-06	6.02701
GHITM	0.864947	-0.0489257	5.14581	3.424e-07	2.48676e-06	6.07731
CPOX	0.864932	-0.0335315	5.16773	3.05839e-07	2.25704e-06	6.18511
TAGLN2	0.864725	0.0398175	5.16255	3.14122e-07	2.30784e-06	6.1596
ADAP2	0.864684	0.0343111	5.12879	3.73662e-07	2.67958e-06	5.99392
ZEB1	-0.86438	0.0523269	-5.20698	2.49604e-07	1.87279e-06	6.37916
BET1	0.863762	0.00180411	5.12952	3.72269e-07	2.67527e-06	5.99748
IGSF1	0.863439	0.0106651	5.12468	3.81611e-07	2.73065e-06	5.97383
PSMB9	0.8634	-0.00628067	5.13241	3.66801e-07	2.6438e-06	6.01161
PLSCR1	0.863364	-0.00600995	5.12429	3.82392e-07	2.73426e-06	5.97188
ZNF211	-0.863057	0.0142641	-5.14575	3.42499e-07	2.48676e-06	6.07703
SNCA	0.862487	-0.00865888	5.16727	3.0657e-07	2.26075e-06	6.18283
HNRNPA3	-0.862481	-0.0219109	-5.10438	4.23371e-07	2.99051e-06	5.87474
SRP9	-0.862447	-0.00372181	-5.12151	3.87867e-07	2.7714e-06	5.95831
RIBC2	0.862342	-0.00311352	5.12939	3.72519e-07	2.67527e-06	5.99684
ARFGAP3	0.862302	0.0111434	5.13987	3.53006e-07	2.55742e-06	6.04819
ZNF202	-0.861902	0.0480027	-5.11609	3.98774e-07	2.84522e-06	5.93185
FUCA1	0.861869	-0.027982	5.13178	3.67978e-07	2.65036e-06	6.00855
HSP90B1	0.86185	-0.0458119	5.12601	3.79029e-07	2.71414e-06	5.98031
MMP1	0.861795	0.0173663	5.09635	4.41082e-07	3.09571e-06	5.83565
RPE65	-0.861758	0.0310769	-5.10815	4.15289e-07	2.94394e-06	5.89313
LOXL1	0.861693	-0.0119482	5.13588	3.60319e-07	2.60467e-06	6.02862
NKX6-1	0.861364	0.00266304	5.14383	3.45911e-07	2.50785e-06	6.06757
PRSS16	0.86122	-0.00508688	5.09972	4.33554e-07	3.05158e-06	5.85207
PLP1	-0.860956	-0.0573843	-5.16275	3.13798e-07	2.30717e-06	6.16059
ALMS1	-0.86078	-0.00852555	-5.10934	4.1279e-07	2.93253e-06	5.89889
LAMB1	0.860165	-0.0031863	5.11939	3.92104e-07	2.79965e-06	5.94795
UTP6	0.859768	-0.0282704	5.11569	3.99592e-07	2.849e-06	5.9299
PRDX6	0.859632	-0.021216	5.1115	4.08252e-07	2.90655e-06	5.90944
MYO1B	0.859462	0.0448528	5.1084	4.14766e-07	2.94234e-06	5.89434
NKX3-1	0.859351	0.0115532	5.10506	4.21895e-07	2.98222e-06	5.87808
SLC12A7	0.859154	0.0428655	5.12813	3.74941e-07	2.6868e-06	5.99066
NDRG4	-0.858837	0.0269565	-5.09958	4.33868e-07	3.05158e-06	5.85138
MEF2A	0.858812	-0.0612625	5.13347	3.64809e-07	2.63328e-06	6.0168
ZBTB39	-0.858587	0.00221802	-5.09467	4.44863e-07	3.11783e-06	5.8275
IQGAP2	-0.858428	0.0447909	-5.13691	3.58418e-07	2.59419e-06	6.03367
MAP7D3	0.858318	-0.0802741	5.13681	3.58606e-07	2.59419e-06	6.03317
NKIRAS2	-0.857964	-0.000834205	-5.11163	4.07976e-07	2.90655e-06	5.91008
PRX	0.857842	-0.017669	5.13094	3.69569e-07	2.65987e-06	6.00443
PRPS2	0.857765	-0.0595111	5.10776	4.16132e-07	2.9478e-06	5.8912
EHD1	0.857333	-0.000306226	5.09251	4.49792e-07	3.15014e-06	5.81699
RASL12	0.857236	-0.00689305	5.11107	4.09145e-07	2.90872e-06	5.90735
MCM7	-0.857021	0.00708395	-5.08949	4.56771e-07	3.19449e-06	5.80231
ARIH1	0.856839	-0.0517363	5.08562	4.65852e-07	3.25156e-06	5.78353
IL10RB	0.856721	0.0136926	5.13321	3.65288e-07	2.63482e-06	6.01555
CA5B	0.85672	-0.0106091	5.11107	4.09136e-07	2.90872e-06	5.90737
NR3C1	0.856625	-0.0185727	5.07537	4.90789e-07	3.41069e-06	5.73379
ZMYM4	-0.856245	-0.0165235	-5.0947	4.44811e-07	3.11783e-06	5.82762
SOD3	0.856002	-0.0490415	5.13025	3.70876e-07	2.66734e-06	6.00106
GNAZ	-0.855967	0.0566419	-5.09962	4.33773e-07	3.05158e-06	5.85159
RSBN1	-0.855795	0.0633295	-5.10602	4.1985e-07	2.96988e-06	5.88271
HNRNPU	-0.855765	-0.00586586	-5.10336	4.2559e-07	3.0019e-06	5.86976
NMT1	0.855452	-0.0597142	5.10102	4.30684e-07	3.03566e-06	5.8584
ASRGL1	-0.855387	-0.0126897	-5.06271	5.2334e-07	3.609e-06	5.67256
SLC29A3	0.854457	0.00384747	5.09102	4.53229e-07	3.17196e-06	5.80973
DSTN	0.854449	-0.0130763	5.0808	4.77418e-07	3.32244e-06	5.76014
HIRIP3	-0.854305	0.00337894	-5.07735	4.85862e-07	3.37882e-06	5.74342
MMADHC	0.853855	-0.0495727	5.10402	4.24156e-07	2.99392e-06	5.87298
GANAB	0.853824	-0.0183168	5.07359	4.95242e-07	3.43922e-06	5.72518
DOLPP1	-0.853813	-0.0160981	-5.08426	4.6909e-07	3.26909e-06	5.77692
CSRNP3	-0.853676	0.037787	-5.07174	4.99914e-07	3.46679e-06	5.71623
R3HCC1	-0.853416	-0.00841009	-5.07265	4.97615e-07	3.45327e-06	5.72062
RPN1	0.853209	-0.046119	5.08438	4.688e-07	3.26909e-06	5.77751
HPS1	0.853184	-0.0347389	5.08633	4.64178e-07	3.244e-06	5.78696
ZMYND8	-0.853176	-0.0104478	-5.05866	5.34205e-07	3.67624e-06	5.65296
ATP2B2	-0.852938	0.0501636	-5.06892	5.07132e-07	3.50456e-06	5.70256
ADAMTS12	0.852788	0.0193766	5.06152	5.26509e-07	3.62833e-06	5.6668
HTR1D	0.852535	0.0347904	5.04867	5.61897e-07	3.84274e-06	5.60478
SNTB2	0.852475	-0.0684121	5.0964	4.40956e-07	3.09571e-06	5.83592
BBS7	0.852464	-0.0235513	5.06018	5.30089e-07	3.65045e-06	5.66034
PDE3B	-0.852428	-0.0346152	-5.09726	4.39037e-07	3.08574e-06	5.84008
RBM47	0.85238	0.0219566	5.0698	5.04868e-07	3.49624e-06	5.70682
ALDH6A1	-0.852341	-0.00893279	-5.06289	5.22857e-07	3.60819e-06	5.67344
CGREF1	-0.851781	-0.0569447	-5.10901	4.13476e-07	2.93529e-06	5.89731
FBXO11	-0.85171	0.00238478	-5.04151	5.82625e-07	3.9517e-06	5.57024
MMP10	0.851436	0.0166523	5.04169	5.82084e-07	3.95074e-06	5.57113
PHF21A	-0.851279	0.0549859	-5.06905	5.06783e-07	3.50456e-06	5.70321
NBEA	-0.851143	0.0344872	-5.0524	5.51399e-07	3.77617e-06	5.62276
TRO	-0.850449	-0.030864	-5.05596	5.41562e-07	3.72169e-06	5.63992
DDX49	-0.850442	0.0204771	-5.03883	5.90548e-07	3.99722e-06	5.55737
SMAD4	-0.850375	0.0113344	-5.07039	5.03347e-07	3.48816e-06	5.7097
SFN	0.850354	0.0186536	5.02504	6.33068e-07	4.24434e-06	5.4911
ST3GAL1	0.850225	0.00590927	5.03304	6.08064e-07	4.09894e-06	5.52951
SIRT2	-0.849962	-0.0552934	-5.1072	4.17321e-07	2.95411e-06	5.88848
SBNO2	0.849946	0.0226963	5.0552	5.43648e-07	3.73343e-06	5.63625
ZBED4	-0.849733	-0.0142426	-5.0652	5.16782e-07	3.56876e-06	5.68458
SLC5A6	-0.849255	0.0148255	-5.06893	5.07081e-07	3.50456e-06	5.70265
PPP1R15A	0.849167	-0.0350621	5.05313	5.4938e-07	3.76756e-06	5.62626
TRAF3IP1	0.849136	-0.00415878	5.04564	5.70592e-07	3.88876e-06	5.59014
BBOX1	-0.849019	-0.00286282	-5.04275	5.78985e-07	3.93511e-06	5.57622
SNTA1	0.848909	-0.0361716	5.04192	5.81421e-07	3.94895e-06	5.57221
EBP	0.848551	-0.079898	5.08559	4.65917e-07	3.25156e-06	5.7834
COL5A3	0.848343	0.0381932	5.01968	6.50384e-07	4.34864e-06	5.46538
GSPT1	-0.848119	-0.0156326	-5.02589	6.30365e-07	4.23196e-06	5.49517
UGCG	0.847739	0.0475813	5.02516	6.32704e-07	4.24434e-06	5.49164
ZNF124	-0.847617	0.00877557	-5.03154	6.12682e-07	4.12726e-06	5.52229
SOCS5	0.847452	-0.0334095	5.04575	5.70249e-07	3.88876e-06	5.59071
KCNAB3	-0.847393	0.0286046	-5.04297	5.78337e-07	3.93341e-06	5.57728
SLC22A5	0.847273	0.00732721	5.01801	6.55872e-07	4.37351e-06	5.45737
ANKRD46	-0.84708	-0.00844841	-5.04121	5.83504e-07	3.95495e-06	5.56881
WRB	-0.847012	-0.00523427	-5.02786	6.24145e-07	4.1959e-06	5.50462
SOCS3	0.846988	0.0465496	5.08182	4.74958e-07	3.30765e-06	5.76506
SRPX	0.846457	0.01764	5.04658	5.67878e-07	3.8756e-06	5.59468
FAM193A	-0.84631	0.0126303	-5.00999	6.82857e-07	4.53815e-06	5.41895
MTA1	-0.846188	-0.0177091	-5.03476	6.028e-07	4.06658e-06	5.53779
GLA	0.84571	-0.0250288	5.05204	5.52395e-07	3.78037e-06	5.62104
ATP2A3	0.845645	-0.0324657	5.03781	5.93588e-07	4.01504e-06	5.55247
IDE	0.845643	-0.0121022	5.04784	5.64276e-07	3.85634e-06	5.60075
OLFML2A	0.845259	-0.0367812	5.01943	6.51227e-07	4.35134e-06	5.46414
C1RL	0.845051	0.0196371	5.01978	6.50051e-07	4.34864e-06	5.46587
HHIPL2	0.8448	0.00277511	5.02143	6.44684e-07	4.31929e-06	5.47377
TRIM25	0.844782	-0.00557767	5.01658	6.60627e-07	4.39929e-06	5.45049
KPNA4	0.844733	-0.00465846	5.00231	7.09703e-07	4.69135e-06	5.38221
MBD3	-0.844595	0.0597237	-5.03057	6.1568e-07	4.14181e-06	5.51764
PDE5A	0.844374	-0.0104926	5.0269	6.27173e-07	4.21339e-06	5.50001
DHPS	-0.844369	0.0720562	-5.03505	6.01911e-07	4.06578e-06	5.5392
AKIRIN1	-0.844321	-0.0156526	-4.98714	7.65769e-07	5.0084e-06	5.30977
INHBE	0.844306	-0.0392063	5.05812	5.35669e-07	3.68375e-06	5.65035
VNN1	0.844169	0.0109983	5.04681	5.67216e-07	3.87376e-06	5.59579
RHOD	0.844125	0.00971799	5.03582	5.99591e-07	4.05287e-06	5.54288
HLA-DPA1	0.844014	-0.0342244	5.04366	5.76307e-07	3.92233e-06	5.58064
FADS2	-0.84397	-0.0197654	-5.00438	7.0238e-07	4.65227e-06	5.39209
FES	0.843898	0.00995803	4.98987	7.55379e-07	4.96342e-06	5.32278
TTLL1	-0.843839	0.0244466	-5.00976	6.83668e-07	4.54049e-06	5.41782
LRRC40	-0.843774	-0.00531483	-5.003	7.07273e-07	4.68154e-06	5.38547
ISG20	0.843562	0.0125096	5.01824	6.55111e-07	4.37283e-06	5.45848
CAPG	0.843443	0.00848787	5.01736	6.58025e-07	4.38491e-06	5.45425
RALY	-0.843414	0.0225342	-5.01818	6.55328e-07	4.37283e-06	5.45816
APOM	-0.843275	-0.0582597	-5.04366	5.76311e-07	3.92233e-06	5.58063
ALAD	0.843255	-0.0616409	5.05459	5.45329e-07	3.74238e-06	5.63331
TUBB6	0.843062	0.0014316	4.99986	7.18487e-07	4.73675e-06	5.37048
SYT1	0.842652	0.0115775	5.00156	7.1238e-07	4.70589e-06	5.37862
TPCN1	0.842649	-0.00206562	4.98939	7.57196e-07	4.96546e-06	5.32049
SYNJ2	0.842551	0.0128866	5.00048	7.16269e-07	4.72684e-06	5.37343
ADAMTS1	0.842286	0.00221526	4.98329	7.80633e-07	5.08878e-06	5.29145
HLA-B	0.841862	-0.0199722	5.00255	7.08839e-07	4.68877e-06	5.38337
SEC23IP	0.841693	-0.0813823	5.0203	6.48377e-07	4.34109e-06	5.46832
SEC61A1	0.841128	-0.0273527	5.00041	7.16506e-07	4.72684e-06	5.37312
GSN	0.840785	-0.0163299	4.97999	7.93636e-07	5.17014e-06	5.27572
AGPS	0.840769	-0.0498105	4.9979	7.25567e-07	4.77956e-06	5.36114
AGA	0.840516	-0.0538862	4.9927	7.44749e-07	4.89682e-06	5.33628
AQR	-0.840273	-0.0533532	-4.9896	7.56385e-07	4.96343e-06	5.32151
PI15	0.840151	-0.0148124	5.01346	6.71059e-07	4.46575e-06	5.43556
DIP2C	-0.840008	0.0258686	-5.03475	6.02852e-07	4.06658e-06	5.53771
ST3GAL6	-0.839897	-0.0665614	-5.03084	6.14841e-07	4.13898e-06	5.51894
ITSN2	0.839679	-0.0433052	5.0075	6.91475e-07	4.58926e-06	5.407
PRPF40A	-0.839573	-0.0125634	-4.9754	8.12028e-07	5.27952e-06	5.2539
TLE1	-0.839475	0.00650477	-4.98825	7.61518e-07	4.98719e-06	5.31507
SAT1	0.839326	-0.0963942	5.03937	5.88956e-07	3.98917e-06	5.55994
APOBEC3G	0.839318	0.00406517	4.95208	9.12111e-07	5.84188e-06	5.14322
MTO1	0.839251	-0.103543	5.05281	5.50268e-07	3.77103e-06	5.62472
STAT4	0.839034	0.0346398	4.96048	8.7477e-07	5.62458e-06	5.18302
FER1L4	0.839029	-0.0329943	4.9978	7.25948e-07	4.77956e-06	5.36064
PHKB	-0.838799	-0.00620363	-4.95928	8.8e-07	5.65086e-06	5.17734
CHN2	-0.838693	0.0280204	-4.98414	7.77345e-07	5.07069e-06	5.29548
FOXRED2	-0.838604	0.00455202	-4.98874	7.59654e-07	4.97828e-06	5.31741
SYNPO	0.838548	-0.0110361	4.96649	8.48938e-07	5.47271e-06	5.21156
SETMAR	-0.838274	-0.0216017	-5.00492	7.00473e-07	4.64275e-06	5.39468
SORCS3	-0.838097	0.0203082	-4.97697	8.05691e-07	5.24521e-06	5.26136
RANGRF	-0.837909	-0.0152855	-4.97458	8.15375e-07	5.29779e-06	5.24998
TBXA2R	0.837359	0.0327741	4.96842	8.40832e-07	5.44075e-06	5.2207
SMARCAL1	0.837287	-0.0236206	4.97358	8.19434e-07	5.31718e-06	5.24525
PRCP	-0.836465	0.0681579	-4.98808	7.62175e-07	4.98819e-06	5.31425
PALLD	0.83624	0.0687542	5.00694	6.93415e-07	4.59905e-06	5.40433
WIZ	-0.835846	0.0383443	-4.96772	8.4375e-07	5.44993e-06	5.2174
CIDEA	0.835811	-0.00445727	4.95445	9.01428e-07	5.78095e-06	5.15443
METTL8	-0.835718	-0.00839241	-4.97366	8.19117e-07	5.31718e-06	5.24562
OSGEPL1	-0.835496	0.0122217	-4.98696	7.66447e-07	5.00951e-06	5.30893
GOLM1	-0.835237	0.0338721	-4.96726	8.45716e-07	5.45906e-06	5.21518
REEP1	-0.834682	0.0361183	-4.96697	8.46909e-07	5.4632e-06	5.21384
IFT20	0.834582	-0.0394628	4.96298	8.63941e-07	5.56218e-06	5.19488
TAF4	-0.834329	0.0213116	-4.93637	9.86129e-07	6.28745e-06	5.06893
POLR2F	-0.834282	-0.000251122	-4.98495	7.74187e-07	5.05342e-06	5.29935
ADCYAP1R1	-0.834239	0.0442642	-4.96832	8.41228e-07	5.44075e-06	5.22025
DNAJC15	0.834144	0.0476822	4.9517	9.13829e-07	5.8491e-06	5.14142
TXNL4A	-0.834102	-0.0442681	-4.9527	9.0932e-07	5.82778e-06	5.14613
ZNF250	-0.833893	0.00184249	-4.97233	8.24593e-07	5.34715e-06	5.23927
CDK6	-0.83367	0.0607207	-4.96774	8.43681e-07	5.44993e-06	5.21748
MSRA	-0.83365	0.0324945	-4.96321	8.6294e-07	5.55936e-06	5.19598
PCK2	0.833575	-0.0682036	5.01205	6.75834e-07	4.4945e-06	5.4288
ZNF117	-0.832962	0.0430962	-4.98663	7.6772e-07	5.01452e-06	5.30734
TBC1D2	0.83234	0.0126809	4.91756	1.0824e-06	6.81339e-06	4.98027
PLAG1	0.832296	-0.00608217	4.94008	9.68161e-07	6.17687e-06	5.08644
NUPL2	-0.832014	-0.0438342	-4.9756	8.11236e-07	5.27784e-06	5.25483
2021-09-09	-0.831428	0.0605365	-4.94395	9.49735e-07	6.06322e-06	5.10473
STT3A	0.8314	0.00448314	4.94551	9.42405e-07	6.02031e-06	5.11211
SH3BGRL3	0.830869	0.0656134	4.99455	7.37861e-07	4.85476e-06	5.34514
TANC2	-0.830849	0.0261773	-4.95978	8.77825e-07	5.64055e-06	5.1797
ECSIT	-0.830823	0.051821	-4.95106	9.16763e-07	5.86029e-06	5.13837
DST	0.830771	-0.0428848	4.9302	1.01675e-06	6.46188e-06	5.03982
LRP12	0.830759	0.0287525	4.98962	7.5631e-07	4.96343e-06	5.32161
GABARAPL1	0.830485	-0.0124033	4.91323	1.10577e-06	6.94281e-06	4.95995
BCL2A1	0.830311	-0.0300214	4.96927	8.3726e-07	5.42218e-06	5.22475
LPXN	0.83026	0.0241756	4.90983	1.12449e-06	7.0425e-06	4.94397
FYN	-0.829985	0.00451669	-4.93313	1.00208e-06	6.37851e-06	5.05366
CDH4	-0.829884	0.0235409	-4.91946	1.07227e-06	6.75823e-06	4.98922
BIN1	0.829455	-0.0075719	4.9263	1.03656e-06	6.5793e-06	5.02146
NAGA	0.829143	0.0129494	4.92891	1.02324e-06	6.49895e-06	5.03376
PIGO	0.829095	-0.0452969	4.92049	1.06684e-06	6.73257e-06	4.99406
ABCD2	-0.828629	0.0153143	-4.91387	1.1023e-06	6.92985e-06	4.96293
IRGQ	-0.828491	0.00982719	-4.90899	1.12918e-06	7.06739e-06	4.94001
GTDC1	-0.828273	0.0129137	-4.90681	1.1414e-06	7.13031e-06	4.92977
SLC2A6	0.828238	-0.00558399	4.90368	1.15913e-06	7.23195e-06	4.9151
PHKA2	0.828218	-0.0623141	4.95902	8.81127e-07	5.65442e-06	5.17612
TDO2	0.828159	-0.0307137	4.93583	9.88752e-07	6.30011e-06	5.0664
RFC3	-0.827672	-0.0272844	-4.92286	1.05436e-06	6.67088e-06	5.00525
PDK3	0.827549	-0.0391826	4.90837	1.13266e-06	7.08465e-06	4.93708
FAM50A	0.827421	-0.0533591	4.93273	1.00409e-06	6.38552e-06	5.05175
PITRM1	0.827146	-0.038415	4.92238	1.05691e-06	6.68271e-06	5.00295
THAP9	-0.826881	-0.0109172	-4.91287	1.10776e-06	6.95093e-06	4.95823
PARP11	-0.826806	0.045553	-4.92158	1.06107e-06	6.70473e-06	4.99922
HGSNAT	0.826623	0.00774782	4.93308	1.00235e-06	6.37851e-06	5.0534
P2RX7	-0.826442	-0.0720163	-4.97202	8.25871e-07	5.35192e-06	5.2378
MTCH2	-0.82642	0.00629561	-4.92111	1.06357e-06	6.71625e-06	4.99697
FZD4	0.826199	-0.0312403	4.91899	1.07473e-06	6.76944e-06	4.98704
H2AFY	-0.826107	0.0342302	-4.90776	1.13608e-06	7.10157e-06	4.93421
PTPRM	0.826064	-0.00190582	4.89078	1.23521e-06	7.66309e-06	4.85462
LASP1	0.825965	-0.0053961	4.90446	1.15472e-06	7.20897e-06	4.91873
DHX40	-0.825763	-0.0146238	-4.92328	1.05216e-06	6.66124e-06	5.00723
FANCI	-0.825733	0.0027603	-4.91186	1.11328e-06	6.97667e-06	4.95351
CXCL2	0.825696	0.0159991	4.88677	1.2598e-06	7.80098e-06	4.83586
DGKB	-0.825653	0.00414717	-4.89629	1.20216e-06	7.48152e-06	4.88042
CSF1	0.825448	0.00260626	4.9121	1.11196e-06	6.97285e-06	4.95463
KLRG1	-0.825347	-0.0322352	-4.96149	8.7036e-07	5.59986e-06	5.18783
AKAP12	0.825226	-0.0230679	4.92374	1.04982e-06	6.65063e-06	5.00936
GYPC	0.825095	0.010873	4.91392	1.10203e-06	6.92985e-06	4.96316
SLC1A5	0.825018	-0.0537308	4.92503	1.04309e-06	6.61651e-06	5.01548
EVI2B	0.82432	0.00533121	4.88183	1.29075e-06	7.96767e-06	4.81278
TNFSF9	0.823943	0.0073505	4.87162	1.35707e-06	8.31479e-06	4.76512
SLC33A1	0.823671	-0.0923441	4.95124	9.15928e-07	5.85874e-06	5.13924
CYB561	0.823273	0.0125307	4.91325	1.10567e-06	6.94281e-06	4.96003
RNF122	-0.823145	0.0461537	-4.92478	1.04442e-06	6.62069e-06	5.01427
ZFX	0.822954	-0.0713623	4.90105	1.17431e-06	7.31742e-06	4.90272
RAPGEF2	-0.822661	0.012788	-4.89919	1.18507e-06	7.3798e-06	4.89404
WDR47	-0.822191	0.0104922	-4.87797	1.31545e-06	8.09e-06	4.79475
HNRNPR	-0.821933	-0.0186604	-4.88019	1.30119e-06	8.01713e-06	4.80511
SPARCL1	-0.821645	0.0450726	-4.90196	1.16903e-06	7.28914e-06	4.907
KNTC1	-0.821446	-0.0130369	-4.87797	1.31547e-06	8.09e-06	4.79473
ACVR2B	-0.821333	-0.0217602	-4.89048	1.23703e-06	7.66961e-06	4.85321
RASAL2	0.821177	-0.0220116	4.87332	1.3458e-06	8.25598e-06	4.77305
HRK	-0.8211	0.0553739	-4.88407	1.27662e-06	7.89525e-06	4.82324
OXSR1	0.82106	-0.0320207	4.89154	1.23056e-06	7.64384e-06	4.8582
LDOC1	0.820927	0.0150841	4.88969	1.24186e-06	7.69468e-06	4.84951
2021-09-02	-0.820885	0.00677825	-4.85016	1.50738e-06	9.1732e-06	4.66523
PTPN2	0.820677	-0.0244536	4.8754	1.33214e-06	8.17726e-06	4.78275
CDH2	-0.820625	0.0388742	-4.8759	1.3289e-06	8.16241e-06	4.78507
POLR2I	-0.820609	0.0224459	-4.88282	1.28448e-06	7.9339e-06	4.81741
MAP3K14	0.820591	-0.00411807	4.87015	1.36689e-06	8.36975e-06	4.75826
FZD7	0.820448	0.0200288	4.8785	1.31203e-06	8.07886e-06	4.79722
GNS	0.820303	-0.0287453	4.87214	1.35359e-06	8.29863e-06	4.76756
MSC	0.820276	0.0484862	4.86075	1.4313e-06	8.73173e-06	4.71447
ADH5	-0.820243	-0.00925791	-4.85201	1.49381e-06	9.09625e-06	4.67382
TMEM156	0.819625	0.0247413	4.88522	1.26943e-06	7.8557e-06	4.82862
EMP3	0.819249	0.0345258	4.86506	1.40138e-06	8.57035e-06	4.73456
JUND	-0.81924	0.0565561	-4.89418	1.21471e-06	7.55488e-06	4.87054
KCNJ8	-0.818308	0.041044	-4.84728	1.52869e-06	9.28251e-06	4.65188
LMBR1L	-0.818201	0.0468212	-4.8621	1.42185e-06	8.68481e-06	4.72077
CPD	0.81794	-0.0230431	4.84766	1.5259e-06	9.28024e-06	4.65361
SIPA1	0.817865	0.0170354	4.88382	1.27819e-06	7.90001e-06	4.82208
ZNF324	-0.817729	0.0174576	-4.85545	1.46891e-06	8.95014e-06	4.68981
SRF	0.817313	-0.0542942	4.87774	1.31694e-06	8.09395e-06	4.79367
NFYB	-0.817169	-0.00873226	-4.83619	1.61365e-06	9.76584e-06	4.60046
RGS10	0.817056	-0.0357418	4.88122	1.29464e-06	7.98174e-06	4.80991
EFCAB2	-0.816995	-0.0155713	-4.86082	1.43077e-06	8.73173e-06	4.71482
CDK7	0.816637	0.0238344	4.86865	1.37698e-06	8.42631e-06	4.75127
USP10	-0.816565	-0.057556	-4.85925	1.44186e-06	8.79073e-06	4.70748
C3	0.816193	-0.0780708	4.9198	1.07046e-06	6.75114e-06	4.99083
FLNB	0.816145	-0.0236982	4.86437	1.40612e-06	8.59404e-06	4.73135
HNRNPM	-0.815685	0.00728767	-4.8251	1.70318e-06	1.02637e-05	4.54914
ZNHIT2	0.815663	-0.00677756	4.82933	1.66844e-06	1.00666e-05	4.56872
THSD7A	-0.815555	0.0192863	-4.84749	1.5271e-06	9.28183e-06	4.65287
ARHGAP12	-0.815518	-0.00969232	-4.89121	1.23257e-06	7.65152e-06	4.85665
C1GALT1C1	0.815452	-0.0475658	4.83556	1.61865e-06	9.77984e-06	4.59752
DLX4	0.814609	-0.00278618	4.84166	1.57121e-06	9.52067e-06	4.62579
SSR3	0.814453	-0.040393	4.82731	1.68497e-06	1.01602e-05	4.55935
PCGF1	0.814452	0.0132297	4.83552	1.61893e-06	9.77984e-06	4.59736
MT1E	0.813707	0.0193682	4.8235	1.71643e-06	1.03373e-05	4.54177
R3HDM1	-0.813471	-0.00422433	-4.83559	1.61842e-06	9.77984e-06	4.59766
DCP2	-0.813191	0.00520335	-4.8045	1.88224e-06	1.12468e-05	4.45414
IL1B	0.813041	0.0239505	4.79824	1.94017e-06	1.15441e-05	4.42534
PARVB	0.813003	-0.0225624	4.84723	1.52909e-06	9.28251e-06	4.65163
CRTC1	-0.812768	0.0414406	-4.82045	1.74208e-06	1.04853e-05	4.52767
GPHN	-0.812606	-0.00829735	-4.81468	1.79162e-06	1.07508e-05	4.50102
CNP	-0.812605	-0.0643758	-4.88166	1.29183e-06	7.96938e-06	4.81198
COG2	-0.812092	-0.0166486	-4.80178	1.90723e-06	1.13755e-05	4.4416
ANKRD17	-0.811927	-0.00212775	-4.80829	1.84799e-06	1.10488e-05	4.47159
PDGFRB	0.811664	0.0163203	4.81055	1.82783e-06	1.09415e-05	4.48201
RNF208	-0.811449	0.0150819	-4.81726	1.76932e-06	1.06299e-05	4.51293
DKK3	0.811196	0.0314296	4.83796	1.5998e-06	9.68795e-06	4.60865
DR1	0.810405	-0.0361473	4.79497	1.97108e-06	1.16999e-05	4.41032
ADRA1B	0.810356	-0.00445214	4.81016	1.83128e-06	1.09556e-05	4.48022
STX6	-0.8102	0.0470291	-4.79334	1.98666e-06	1.17641e-05	4.40284
PLCE1	-0.810108	0.0209967	-4.79778	1.94454e-06	1.15632e-05	4.4232
NSMAF	0.809939	0.0446325	4.817	1.77154e-06	1.06368e-05	4.51173
SYPL1	0.809777	0.00343334	4.81972	1.7483e-06	1.05164e-05	4.52428
TIMM13	-0.809323	-0.00322084	-4.78016	2.11724e-06	1.24405e-05	4.34237
SLITRK3	-0.809025	0.0340012	-4.79889	1.93412e-06	1.15151e-05	4.4283
NYNRIN	-0.808928	0.0331096	-4.81231	1.81229e-06	1.08617e-05	4.49012
LYRM4	-0.808703	-0.0521511	-4.83489	1.62395e-06	9.8042e-06	4.59441
AHCYL2	-0.808662	-0.041655	-4.84639	1.53533e-06	9.31463e-06	4.64776
INTS9	-0.808584	0.00217906	-4.77495	2.17108e-06	1.27266e-05	4.31852
ASNA1	-0.808504	0.0547264	-4.79901	1.93295e-06	1.1515e-05	4.42888
FOXN2	-0.808203	-0.0122167	-4.79341	1.98602e-06	1.17641e-05	4.40315
LAMC2	0.808041	0.0213352	4.78537	2.06467e-06	1.21823e-05	4.36625
CTF1	0.807938	0.0138997	4.78828	2.03591e-06	1.2027e-05	4.37958
CREB3	0.807875	0.0024039	4.7814	2.10468e-06	1.23888e-05	4.34802
MCM10	-0.807806	-0.00162928	-4.78162	2.1024e-06	1.23828e-05	4.34905
RNH1	0.807797	0.0294298	4.80392	1.88759e-06	1.12652e-05	4.45144
CLK3	0.807114	-0.034869	4.7945	1.9756e-06	1.17197e-05	4.40814
CARD8	-0.806764	0.05087	-4.78723	2.04621e-06	1.20806e-05	4.37478
BBX	0.806507	0.00232585	4.81084	1.82532e-06	1.09331e-05	4.48332
EMP1	0.806083	0.0296014	4.78038	2.11502e-06	1.24349e-05	4.34337
AP1M2	0.805865	0.00977307	4.80035	1.92051e-06	1.14478e-05	4.43501
PDIA3	0.805816	-0.0454317	4.78982	2.0208e-06	1.19448e-05	4.38666
RIPK2	0.805754	0.0314689	4.77827	2.13668e-06	1.25473e-05	4.33369
UXS1	0.805493	-0.00881524	4.78415	2.07687e-06	1.2247e-05	4.36066
GLOD4	-0.805329	0.0194431	-4.77629	2.15719e-06	1.26527e-05	4.32462
DHX57	-0.805233	-0.0405891	-4.84279	1.5626e-06	9.47426e-06	4.63102
RHOF	0.805222	-0.0280047	4.795	1.97086e-06	1.16999e-05	4.41043
SEMA5A	-0.80509	0.0698992	-4.8124	1.81156e-06	1.08617e-05	4.49051
RFC2	-0.804875	-0.028881	-4.7829	2.08948e-06	1.2314e-05	4.35491
FERMT1	0.804852	-0.0628189	4.89258	1.22432e-06	7.60988e-06	4.86304
PKP2	0.804606	-0.0235298	4.77483	2.17242e-06	1.27269e-05	4.31794
SLC24A3	-0.804291	0.0446718	-4.77787	2.14078e-06	1.25639e-05	4.33187
FOXC2	0.804124	0.027469	4.74664	2.48761e-06	1.44366e-05	4.18929
ASS1	0.804094	-0.0475896	4.7972	1.94993e-06	1.15882e-05	4.42057
SULF1	0.803821	0.019598	4.74053	2.56151e-06	1.48133e-05	4.1615
FBXO21	-0.803668	0.0116018	-4.76269	2.30313e-06	1.34688e-05	4.26245
SMPDL3B	0.803258	-0.0227791	4.79336	1.98649e-06	1.17641e-05	4.40292
DDIT3	0.803075	-0.00482104	4.75938	2.34003e-06	1.36603e-05	4.24736
TUBA1B	-0.802906	-0.00824413	-4.73895	2.58099e-06	1.48998e-05	4.15431
HUNK	-0.80288	-0.0178031	-4.75499	2.3899e-06	1.39104e-05	4.22734
MATN2	-0.80275	-0.0206297	-4.75914	2.34274e-06	1.3668e-05	4.24626
ATXN10	-0.802328	-0.0143112	-4.7913	2.00636e-06	1.18737e-05	4.39347
PDCD10	0.801153	-0.0496127	4.74652	2.48907e-06	1.44366e-05	4.18874
UBXN8	-0.800972	-0.0466261	-4.74475	2.51021e-06	1.45422e-05	4.18071
DCLRE1C	-0.800425	-0.0417564	-4.74265	2.53563e-06	1.46722e-05	4.17115
ZNF669	-0.80029	0.0309017	-4.73839	2.58787e-06	1.49308e-05	4.15179
ENOX2	0.800146	-0.0653853	4.78078	2.11096e-06	1.24184e-05	4.34519
GALNT2	0.800139	-0.0151532	4.73116	2.67898e-06	1.54115e-05	4.11894
PPP1R11	0.800129	-0.0362761	4.7489	2.46078e-06	1.42893e-05	4.19959
MYO5C	-0.800058	-0.0479405	-4.75968	2.33666e-06	1.36487e-05	4.24873
PDE8A	0.799746	-0.0864859	4.80435	1.88364e-06	1.12484e-05	4.45343
SUB1	-0.799733	-0.00416165	-4.74933	2.4557e-06	1.42681e-05	4.20155
GTPBP2	0.799509	-0.0688274	4.791	2.00931e-06	1.1884e-05	4.39207
ADSS	0.799437	-0.0132737	4.75559	2.38298e-06	1.38794e-05	4.23009
MEX3D	-0.799042	0.0174229	-4.72643	2.74018e-06	1.5727e-05	4.09751
TLR3	0.798863	-0.00691991	4.73053	2.687e-06	1.54397e-05	4.11611
CDK2AP2	0.7988	0.0145976	4.73456	2.63569e-06	1.51801e-05	4.13441
YKT6	0.798766	0.0142225	4.7396	2.57293e-06	1.48619e-05	4.15728
WWP1	0.798664	-0.0159669	4.76065	2.32585e-06	1.35936e-05	4.25313
ZNF215	0.798623	0.0314647	4.71373	2.91134e-06	1.66129e-05	4.04001
GPRC5C	0.798497	0.00262561	4.75453	2.39514e-06	1.39269e-05	4.22526
SLC35C2	0.798435	-0.0436524	4.75558	2.38318e-06	1.38794e-05	4.23001
E2F3	-0.798231	-0.0992558	-4.81953	1.74987e-06	1.05194e-05	4.52343
TLK1	-0.797941	0.0197179	-4.72054	2.81825e-06	1.61283e-05	4.07085
CLIC3	0.797528	0.0082165	4.7111	2.94804e-06	1.67836e-05	4.02813
AKR1C1	0.797001	0.0132184	4.70311	3.06222e-06	1.73737e-05	3.99207
URB2	-0.796769	-0.0264391	-4.72518	2.75651e-06	1.58024e-05	4.09187
ATOX1	0.796748	0.00539709	4.71623	2.87682e-06	1.64349e-05	4.05133
JAK3	0.796332	0.00588416	4.72089	2.81359e-06	1.61109e-05	4.07242
SPTBN1	0.795897	0.00831124	4.7545	2.39555e-06	1.39269e-05	4.22509
YIPF3	0.795795	-0.0385718	4.74022	2.56526e-06	1.48263e-05	4.16012
COASY	0.795602	-0.0535282	4.73822	2.58995e-06	1.49341e-05	4.15102
HYI	0.795539	0.0294904	4.72153	2.80506e-06	1.60714e-05	4.0753
AKAP7	-0.7955	0.0213772	-4.68873	3.27868e-06	1.85062e-05	3.92729
RSF1	-0.795447	0.0108658	-4.73083	2.68311e-06	1.54263e-05	4.11748
FSD1	-0.795435	0.0132923	-4.70715	3.00398e-06	1.70825e-05	4.01029
DAP	0.795411	-0.0487691	4.71361	2.91303e-06	1.6613e-05	4.03946
ERF	-0.795324	0.0357143	-4.70495	3.03566e-06	1.72428e-05	4.00034
KLHL7	-0.794794	0.0231772	-4.71124	2.94608e-06	1.67821e-05	4.02876
SSBP3	-0.794776	-0.0238271	-4.72581	2.74832e-06	1.57646e-05	4.09469
CCDC28A	0.794607	-0.06171	4.74543	2.5021e-06	1.45037e-05	4.18378
C9orf3	0.794175	-0.0586858	4.77011	2.22228e-06	1.30113e-05	4.29639
OPA1	-0.794016	-0.026867	-4.7117	2.93967e-06	1.67553e-05	4.03082
C19orf57	-0.793994	0.00234323	-4.70432	3.04471e-06	1.72842e-05	3.99752
KIFAP3	0.793896	0.0474635	4.71953	2.83194e-06	1.61973e-05	4.06625
SMO	-0.793498	0.0341872	-4.74365	2.52344e-06	1.46103e-05	4.17572
RRAD	0.79349	0.0143269	4.69105	3.24292e-06	1.83463e-05	3.93769
VGLL4	-0.793456	-0.0095197	-4.71381	2.91018e-06	1.66129e-05	4.04039
TNNT1	0.793285	0.0127103	4.68182	3.38796e-06	1.90037e-05	3.89619
OSBP	0.793157	-0.00310425	4.71937	2.83409e-06	1.62002e-05	4.06553
KCNIP2	-0.793104	-0.0286295	-4.73654	2.61082e-06	1.50457e-05	4.14341
WNT11	0.793085	0.0172822	4.69017	3.25641e-06	1.84015e-05	3.93375
RBP4	0.792582	-0.0053473	4.68223	3.38136e-06	1.89774e-05	3.89804
TEC	0.792566	0.00895028	4.6858	3.32457e-06	1.87118e-05	3.9141
MAP3K11	0.79215	-0.0429421	4.70722	3.003e-06	1.70825e-05	4.0106
KHDRBS1	-0.791785	-0.010878	-4.68333	3.36369e-06	1.88997e-05	3.90301
B4GALT5	-0.791658	-0.0143492	-4.68737	3.2999e-06	1.85942e-05	3.92117
PPP4R4	0.791308	0.0153899	4.67881	3.43656e-06	1.92545e-05	3.88268
FSTL3	0.791183	0.0517554	4.70518	3.03226e-06	1.72334e-05	4.0014
ALX1	0.791173	-0.0485877	4.75571	2.3817e-06	1.38794e-05	4.2306
LDLR	0.791129	0.0580347	4.76815	2.2434e-06	1.31272e-05	4.2874
HSPA2	0.791061	0.0223389	4.67743	3.45915e-06	1.93372e-05	3.87647
ATP1A2	-0.791008	0.026056	-4.67112	3.5639e-06	1.98108e-05	3.84818
ACPP	0.790998	-0.00881545	4.66851	3.60815e-06	2.0023e-05	3.83648
C8G	0.790909	0.0234067	4.69941	3.1166e-06	1.76619e-05	3.97538
ARL3	-0.79065	0.038536	-4.70286	3.06591e-06	1.73846e-05	3.99093
HGS	0.79061	-0.00197457	4.68765	3.29558e-06	1.85856e-05	3.92241
CUEDC2	-0.790371	-0.0227608	-4.72682	2.73503e-06	1.57066e-05	4.09929
TBC1D22A	0.790364	-0.0143845	4.68249	3.37721e-06	1.89649e-05	3.89921
VRK3	-0.78996	0.014414	-4.69324	3.20934e-06	1.81667e-05	3.94756
BDKRB1	0.789725	-0.00442722	4.69077	3.24719e-06	1.83599e-05	3.93644
CASP2	-0.789431	-0.0126202	-4.65269	3.88772e-06	2.149e-05	3.76573
SLC27A2	0.789229	0.0269606	4.67316	3.52972e-06	1.9665e-05	3.85732
KCND1	0.789146	-0.0250868	4.67246	3.54139e-06	1.97189e-05	3.85419
ATP8B3	0.788901	0.0276012	4.67677	3.46983e-06	1.9386e-05	3.87355
TOM1L1	0.788755	-0.0822856	4.69567	3.17251e-06	1.79685e-05	3.95851
ZNF337	-0.788737	0.0697692	-4.68995	3.2598e-06	1.84102e-05	3.93276
GATA3	0.788415	0.0124922	4.68652	3.31327e-06	1.86588e-05	3.91733
SGPP1	0.788366	-0.0326199	4.67622	3.4789e-06	1.94147e-05	3.87107
LIFR	-0.78824	0.0308843	-4.67444	3.50844e-06	1.95685e-05	3.86305
CALR	0.788008	-0.0504196	4.68389	3.35485e-06	1.88608e-05	3.9055
CDKL2	0.787112	-0.00783533	4.67172	3.55379e-06	1.97657e-05	3.85088
ZNF132	-0.786342	0.00895511	-4.66953	3.59074e-06	1.99376e-05	3.84107
PCTP	0.786106	-0.0434954	4.73247	2.66225e-06	1.53242e-05	4.12489
SCAMP5	-0.786049	0.0316831	-4.64565	4.01878e-06	2.21773e-05	3.73431
AQP4	-0.785998	0.0368587	-4.649	3.95594e-06	2.18549e-05	3.74924
THAP10	-0.785954	0.00587366	-4.67186	3.5515e-06	1.97641e-05	3.85149
KHSRP	-0.785487	0.00146927	-4.63583	4.20875e-06	2.3148e-05	3.69053
RAVER2	-0.785466	-0.0180277	-4.67865	3.4392e-06	1.92583e-05	3.88196
CHCHD7	0.785136	-0.00981548	4.63568	4.21158e-06	2.3148e-05	3.68989
CAMK1D	-0.784843	0.0533385	-4.67762	3.45593e-06	1.93301e-05	3.87735
RASSF9	0.784807	-0.0451903	4.68019	3.41411e-06	1.91395e-05	3.8889
SAGE1	0.784467	0.0140933	4.63475	4.22998e-06	2.32166e-05	3.68576
DTL	-0.784164	-0.023198	-4.63781	4.16978e-06	2.29465e-05	3.69935
CHST8	-0.783853	0.0374049	-4.64343	4.06097e-06	2.23851e-05	3.72441
RNF138	-0.78376	-0.0270717	-4.62595	4.4084e-06	2.40722e-05	3.64661
RBCK1	0.783703	-0.0199695	4.63237	4.27754e-06	2.34482e-05	3.67517
USP11	-0.783611	-0.0424828	-4.65867	3.77971e-06	2.09164e-05	3.79244
COL8A1	0.783589	0.0142422	4.6305	4.31531e-06	2.35899e-05	3.66684
RAD50	0.783132	-0.0326901	4.63114	4.30229e-06	2.35488e-05	3.6697
CPPED1	0.782782	-0.06813	4.66784	3.61959e-06	2.00705e-05	3.83348
DTNA	-0.782696	0.034601	-4.684	3.35311e-06	1.88608e-05	3.906
ERAP2	0.782459	0.0410381	4.63559	4.2134e-06	2.3148e-05	3.68948
FUT9	-0.782302	-0.0213987	-4.67846	3.44218e-06	1.92641e-05	3.88113
KCNAB2	0.782258	-0.0817409	4.68759	3.29651e-06	1.85856e-05	3.92214
NOTCH1	-0.782183	0.0213861	-4.64379	4.05403e-06	2.23593e-05	3.72603
THY1	-0.782058	0.00267294	-4.63106	4.30389e-06	2.35488e-05	3.66935
SSR4	0.781896	-0.0321215	4.64108	4.10616e-06	2.2609e-05	3.71392
ACAP2	0.781823	-0.0377017	4.63472	4.2306e-06	2.32166e-05	3.68562
ACSM3	0.78175	0.010246	4.67098	3.5662e-06	1.98125e-05	3.84757
FGFR2	-0.78142	-0.0240504	-4.63099	4.30542e-06	2.35488e-05	3.66901
DDX10	0.780972	0.0393916	4.63362	4.25254e-06	2.33241e-05	3.68072
PIM1	0.780593	0.0104465	4.61564	4.62642e-06	2.51239e-05	3.60088
SULT1C2	0.780546	-1.91106e-05	4.62382	4.45255e-06	2.42807e-05	3.63717
CASP1	0.780504	-0.00282452	4.62041	4.52424e-06	2.46231e-05	3.62204
RBM41	0.780413	-0.00818997	4.60458	4.87188e-06	2.6298e-05	3.55191
BTN2A1	0.7802	-0.0820035	4.65769	3.79719e-06	2.10013e-05	3.78807
PCCA	-0.779782	0.0118701	-4.61212	4.70318e-06	2.54848e-05	3.58529
CSTF2T	-0.779512	-0.0416669	-4.66777	3.62077e-06	2.00705e-05	3.83317
IL17RC	0.779437	-0.0121209	4.60495	4.8636e-06	2.62677e-05	3.55352
MARK3	-0.779208	-0.0185864	-4.61358	4.67124e-06	2.53367e-05	3.59175
RBM6	-0.779022	0.00687514	-4.60566	4.84741e-06	2.61945e-05	3.55668
PDZD8	0.778971	-0.0663	4.6622	3.71727e-06	2.05939e-05	3.80823
FAM189B	0.778828	-0.0297686	4.61482	4.64433e-06	2.52074e-05	3.59722
MAT1A	0.778762	-0.0264731	4.61876	4.55951e-06	2.47902e-05	3.61468
KLHL22	-0.778475	0.0408988	-4.6734	3.52564e-06	1.96533e-05	3.85842
ATP2C1	0.778361	-0.0172897	4.63224	4.28028e-06	2.34502e-05	3.67456
RAB23	0.778095	-0.0577704	4.62666	4.39365e-06	2.40049e-05	3.64979
CORO1A	-0.77789	0.0409764	-4.62063	4.51956e-06	2.46112e-05	3.62302
ZNF45	-0.777749	0.0148421	-4.60623	4.83465e-06	2.61399e-05	3.55918
VAT1	0.777341	-0.00183431	4.60341	4.89868e-06	2.64283e-05	3.54672
PRDX4	0.7773	-0.0916104	4.64692	3.99492e-06	2.20579e-05	3.73995
C1QTNF1	0.777035	-0.0201546	4.62073	4.51755e-06	2.46112e-05	3.62344
DBF4	-0.777022	-0.0192191	-4.61349	4.67329e-06	2.53367e-05	3.59133
EIF1	0.776711	-0.00496205	4.58731	5.28033e-06	2.83174e-05	3.47567
CNNM3	-0.776675	-0.0699312	-4.67635	3.47675e-06	1.94136e-05	3.87166
ZNF302	-0.776638	0.0328517	-4.62392	4.45063e-06	2.42807e-05	3.63758
CHL1	-0.77663	0.00154385	-4.58998	5.21527e-06	2.79836e-05	3.48741
MFF	-0.776108	-0.054826	-4.64128	4.10217e-06	2.25996e-05	3.71484
SLC15A2	-0.776085	0.00735639	-4.60693	4.81887e-06	2.60688e-05	3.56227
KIF5A	-0.776	0.03729	-4.61873	4.55996e-06	2.47902e-05	3.61459
RETSAT	0.775953	-0.00398492	4.58503	5.33664e-06	2.85768e-05	3.46562
PTPRH	0.775502	0.00469041	4.60887	4.77526e-06	2.5847e-05	3.57089
POLI	-0.775048	0.0219605	-4.60093	4.95568e-06	2.67212e-05	3.53576
CFDP1	-0.77504	-0.0504879	-4.59281	5.147e-06	2.76774e-05	3.49989
SOAT1	0.77465	-0.0451191	4.61104	4.72719e-06	2.56008e-05	3.58047
SPTLC3	0.774618	0.0107077	4.59345	5.13167e-06	2.761e-05	3.50271
SCMH1	-0.774316	-0.0480177	-4.59149	5.17872e-06	2.78026e-05	3.49407
ST8SIA1	-0.774214	0.00623607	-4.59514	5.09128e-06	2.74225e-05	3.51019
PRKCI	0.774183	0.0291291	4.59521	5.08965e-06	2.74225e-05	3.5105
TMEM40	0.773986	0.0292598	4.57481	5.59637e-06	2.98342e-05	3.42063
ALDH3B1	0.773942	0.0103402	4.57359	5.62807e-06	2.99709e-05	3.41528
DUSP3	0.773874	0.0110855	4.58601	5.31237e-06	2.84737e-05	3.46994
CLOCK	0.773823	-0.00449253	4.59484	5.09846e-06	2.74462e-05	3.50886
E2F2	-0.773511	-0.0193612	-4.58215	5.40858e-06	2.89111e-05	3.45294
SMURF2	0.773057	0.0419128	4.59219	5.16181e-06	2.77269e-05	3.49716
KDM3B	-0.773043	0.0158755	-4.57617	5.56099e-06	2.96776e-05	3.42663
XBP1	0.77303	-0.0676294	4.61714	4.59406e-06	2.49619e-05	3.60753
KCNJ4	-0.772951	0.00257	-4.62376	4.45395e-06	2.42807e-05	3.63688
CSF1R	0.772846	-0.0099699	4.585	5.33737e-06	2.85768e-05	3.46549
TBC1D2B	0.771894	-0.0160447	4.5685	5.76261e-06	3.06214e-05	3.39292
ARHGDIG	-0.771774	0.0287369	-4.56634	5.82067e-06	3.08802e-05	3.38343
RAB8B	-0.771538	-0.00707473	-4.59263	5.15121e-06	2.7685e-05	3.49911
PHC3	0.771446	0.00319138	4.5739	5.6199e-06	2.99435e-05	3.41666
ZNF430	-0.771403	0.0240257	-4.58434	5.35377e-06	2.8649e-05	3.46259
CAPRIN2	0.771208	-0.00664924	4.57702	5.53912e-06	2.95769e-05	3.43037
TTC28	-0.770898	0.00135741	-4.56962	5.73282e-06	3.04795e-05	3.39783
APOL3	0.770497	-0.00038717	4.54537	6.41366e-06	3.37725e-05	3.29162
MTDH	0.770398	0.0155679	4.56719	5.79772e-06	3.07749e-05	3.38717
GAS6	0.770076	0.0774679	4.57758	5.52492e-06	2.9517e-05	3.4328
SOX9	-0.77007	0.105371	-4.66065	3.74459e-06	2.07336e-05	3.80129
NUCB2	0.769757	0.000277034	4.56808	5.77382e-06	3.06645e-05	3.39108
CASP5	0.769227	-0.0206254	4.55812	6.04639e-06	3.2009e-05	3.34742
EPB41L4B	0.769042	-0.00425539	4.56555	5.842e-06	3.09767e-05	3.37997
WFS1	0.768969	0.0237632	4.55501	6.1342e-06	3.24391e-05	3.33377
NDUFA4	-0.768916	0.00708865	-4.56057	5.97842e-06	3.16831e-05	3.35812
GATM	-0.768893	0.0174906	-4.54914	6.3028e-06	3.32596e-05	3.30812
EWSR1	-0.768798	0.0122811	-4.57163	5.67943e-06	3.02119e-05	3.40668
MRPS31	-0.768797	-0.00526658	-4.55025	6.27064e-06	3.31075e-05	3.31296
SLC15A3	0.768516	0.0189296	4.57202	5.66916e-06	3.01735e-05	3.4084
P2RY2	0.768376	0.000494468	4.53426	6.75079e-06	3.53594e-05	3.24315
SLC39A8	0.768183	-0.0170224	4.55434	6.15309e-06	3.25216e-05	3.33087
SERPINB9	0.768162	0.0176385	4.53046	6.8702e-06	3.58898e-05	3.22656
TGM5	0.767563	-0.00722906	4.5428	6.4901e-06	3.41023e-05	3.28041
GLRX2	0.767118	-0.0321256	4.55874	6.02915e-06	3.19348e-05	3.35012
FBXO2	0.767034	0.0587558	4.53227	6.81318e-06	3.56296e-05	3.23445
AFP	0.766882	-0.0209676	4.5485	6.32161e-06	3.3341e-05	3.3053
KLHDC4	-0.766758	-0.0427091	-4.54631	6.38591e-06	3.36442e-05	3.29572
CTDSPL	0.766687	0.0346404	4.54239	6.50243e-06	3.4149e-05	3.27861
NUFIP1	-0.766169	-0.0123754	-4.54346	6.47038e-06	3.40168e-05	3.28329
ARHGAP22	0.765957	0.0119764	4.53327	6.78173e-06	3.54839e-05	3.23882
ATP6V1B2	-0.765885	0.0034353	-4.54705	6.36415e-06	3.35475e-05	3.29895
BAG5	-0.765656	-0.0074628	-4.51221	7.47109e-06	3.87473e-05	3.14726
BACH2	-0.765172	0.0278024	-4.55103	6.24797e-06	3.30054e-05	3.31638
BEX1	-0.765078	0.0122963	-4.52097	7.17666e-06	3.73723e-05	3.18528
POLR2J	-0.764704	0.0103039	-4.52015	7.20357e-06	3.74908e-05	3.18174
ZFP36L1	0.764353	0.0646234	4.53082	6.85854e-06	3.58478e-05	3.22817
SLC7A5	0.764234	-0.0604607	4.54399	6.45458e-06	3.39518e-05	3.2856
NFE2L3	0.764193	-0.00673802	4.55575	6.11314e-06	3.2345e-05	3.33703
GNB5	0.763894	-0.0014488	4.52718	6.97463e-06	3.63969e-05	3.21229
IBTK	0.763679	-0.0576153	4.53748	6.65126e-06	3.4875e-05	3.2572
FSCN1	-0.763494	0.0231345	-4.50676	7.66039e-06	3.96201e-05	3.12359
AKAP8L	-0.763418	0.0413953	-4.52318	7.10399e-06	3.70329e-05	3.19491
ERCC3	-0.763399	-0.0703421	-4.54445	6.44101e-06	3.38984e-05	3.28759
TGFBR3	0.762953	-0.0186547	4.51318	7.43787e-06	3.86105e-05	3.15147
ZNF562	-0.762836	0.0429273	-4.5248	7.05143e-06	3.67782e-05	3.20193
PTMS	-0.762597	0.060143	-4.51207	7.47596e-06	3.87473e-05	3.14664
DAAM1	-0.762557	-0.00598986	-4.51801	7.27501e-06	3.78247e-05	3.17241
COL10A1	0.762435	-0.00151504	4.5079	7.62022e-06	3.9433e-05	3.12857
ZNF234	-0.7624	0.0223532	-4.51357	7.42461e-06	3.8562e-05	3.15316
MOSPD2	0.762181	-0.0667468	4.53383	6.76436e-06	3.54117e-05	3.24125
LPAR1	0.762077	-0.00598397	4.54159	6.52647e-06	3.4257e-05	3.27512
CREBBP	-0.762	0.0184232	-4.51367	7.42142e-06	3.8562e-05	3.15356
BLM	-0.761758	0.0253834	-4.50551	7.70413e-06	3.98255e-05	3.11821
FAS	0.76156	0.0437146	4.52157	7.15678e-06	3.72884e-05	3.1879
PPARA	0.761372	-0.0334688	4.52727	6.9716e-06	3.63969e-05	3.2127
ST6GALNAC4	0.76063	-0.0237235	4.49155	8.21256e-06	4.2233e-05	3.05779
WDR7	-0.760623	-0.0220248	-4.53642	6.68399e-06	3.50281e-05	3.25256
LOX	0.760619	-0.000715576	4.50109	7.86192e-06	4.06199e-05	3.09904
CD164	0.760302	-0.0395275	4.52005	7.20699e-06	3.74908e-05	3.18129
MBNL2	0.760028	-0.0719231	4.57545	5.57966e-06	2.97612e-05	3.42346
TWSG1	0.759594	0.0525035	4.53798	6.63614e-06	3.48142e-05	3.25935
CORO2A	0.75948	-0.0144405	4.49937	7.92386e-06	4.08759e-05	3.09162
ANO10	0.758711	-0.0341465	4.49831	7.96248e-06	4.10537e-05	3.08702
SH3GLB1	0.758674	0.0275987	4.51169	7.48887e-06	3.87939e-05	3.14501
PLEKHA1	0.758579	-0.0468833	4.49429	8.11034e-06	4.17507e-05	3.06963
ZNF330	0.757865	-0.0231568	4.49253	8.17571e-06	4.20654e-05	3.06204
SECTM1	0.757755	0.0110106	4.47137	9.00434e-06	4.60175e-05	2.97079
TRIB3	0.757662	-0.0432887	4.51212	7.47422e-06	3.87473e-05	3.14686
ARPC5	0.757522	-0.0354366	4.49643	8.03111e-06	4.13644e-05	3.07891
SDHAF1	-0.757132	0.0140665	-4.4758	8.82455e-06	4.51687e-05	2.98985
COL6A1	0.757053	0.0492799	4.47777	8.74567e-06	4.48113e-05	2.99834
TNFRSF10B	0.75698	0.0172939	4.47658	8.79303e-06	4.50307e-05	2.99324
TMEM160	-0.756681	0.00645508	-4.46309	9.34969e-06	4.76347e-05	2.93523
AASS	-0.756619	-0.0221538	-4.4846	8.4774e-06	4.35496e-05	3.02779
RTN3	-0.756436	0.0506857	-4.50005	7.89945e-06	4.07925e-05	3.09454
AAAS	-0.756163	-0.0249698	-4.50846	7.60077e-06	3.93529e-05	3.13098
SIRT5	0.756095	-0.0552416	4.48734	8.37206e-06	4.30308e-05	3.03961
COL4A3	0.756068	-0.0115027	4.45842	9.55028e-06	4.85068e-05	2.91518
DKK2	0.755514	0.00973929	4.46228	9.38423e-06	4.77861e-05	2.93175
KDM5B	-0.755219	0.0123905	-4.4567	9.625e-06	4.88362e-05	2.90781
FARP1	-0.755217	0.00726301	-4.45512	9.69426e-06	4.91119e-05	2.90104
C21orf91	0.75494	-0.0282937	4.46942	9.08469e-06	4.63777e-05	2.9624
MFSD6	0.754467	-0.0304742	4.45566	9.67067e-06	4.90175e-05	2.90334
CNKSR2	-0.754156	-0.0239758	-4.46133	9.4248e-06	4.79433e-05	2.92767
VIPR1	0.754029	-0.0211243	4.47386	8.90282e-06	4.55458e-05	2.98151
C16orf45	-0.753969	0.115306	-4.58415	5.35868e-06	2.86598e-05	3.46172
SRGAP3	-0.753695	0.0274835	-4.47011	9.05617e-06	4.62585e-05	2.96537
SAFB	-0.75369	0.0130411	-4.4478	1.00215e-05	5.06141e-05	2.86968
CADPS2	0.753468	0.0233371	4.47924	8.68727e-06	4.45552e-05	3.00467
ID2	-0.753337	0.0364559	-4.46931	9.08889e-06	4.63777e-05	2.96196
PI3	0.753097	-0.0198847	4.47914	8.69118e-06	4.45552e-05	3.00425
BICD2	0.752731	-0.0448996	4.49688	8.01461e-06	4.13009e-05	3.08085
GABBR1	-0.752476	-0.00420519	-4.46569	9.23993e-06	4.71241e-05	2.94639
RPS6KA2	-0.752427	0.0229373	-4.45824	9.55798e-06	4.8521e-05	2.91441
PPL	0.751968	-0.0212506	4.44505	1.01472e-05	5.11967e-05	2.8579
HTR4	0.751941	0.00820964	4.44005	1.03797e-05	5.22366e-05	2.83651
CAND1	-0.751851	0.00233088	-4.46204	9.39432e-06	4.78129e-05	2.93073
COL9A3	-0.751628	-0.025062	-4.44473	1.01621e-05	5.12457e-05	2.85652
ZNF544	0.751245	-0.0636965	4.45648	9.63469e-06	4.88602e-05	2.90686
RIC8B	-0.75108	-0.0342085	-4.44877	9.97768e-06	5.04594e-05	2.87382
TUFT1	0.750753	-0.00211993	4.44431	1.01814e-05	5.13168e-05	2.85473
SLC4A8	-0.750363	0.0428052	-4.48336	8.52548e-06	4.37739e-05	3.02244
CIAPIN1	-0.750315	-0.0139947	-4.47953	8.67549e-06	4.4521e-05	3.00596
LRRC1	0.75018	-0.0588437	4.49947	7.92048e-06	4.08759e-05	3.09202
DENND5A	-0.750144	0.0194835	-4.46486	9.27505e-06	4.72788e-05	2.9428
SMARCA5	-0.749834	-0.0302347	-4.43971	1.03955e-05	5.22897e-05	2.83507
ACBD3	0.749641	-0.0541913	4.45961	9.49873e-06	4.82946e-05	2.92029
IRAK1	0.74958	0.0115557	4.4726	8.9539e-06	4.57834e-05	2.9761
MAGEB2	0.749573	-0.00590642	4.42945	1.08888e-05	5.45766e-05	2.79129
MN1	-0.749508	0.0277669	-4.42387	1.11665e-05	5.57986e-05	2.76751
ARSA	0.749261	-0.0429498	4.44656	1.00779e-05	5.08732e-05	2.86437
DIAPH2	0.74926	-0.0483814	4.45142	9.85851e-06	4.9893e-05	2.88517
SRD5A3	0.749186	-0.0314928	4.45476	9.71032e-06	4.91681e-05	2.89948
RRP15	-0.748848	-0.0242002	-4.43808	1.04725e-05	5.25965e-05	2.8281
CHSY1	0.748815	-0.00539063	4.42855	1.09334e-05	5.47722e-05	2.78743
MPP1	0.748297	-0.024639	4.4324	1.07449e-05	5.39101e-05	2.80385
ADRM1	0.74798	-0.0128135	4.41848	1.14414e-05	5.70284e-05	2.74455
DMTF1	-0.747917	-0.0303629	-4.41549	1.15961e-05	5.77122e-05	2.73187
PRMT1	-0.747853	0.0115766	-4.41159	1.18015e-05	5.86164e-05	2.71529
SSSCA1	0.747785	-0.00780639	4.44176	1.02994e-05	5.18854e-05	2.84384
PPP1R9A	-0.747648	-0.04915	-4.42497	1.11113e-05	5.55791e-05	2.77219
TRAK1	-0.747571	-0.0159361	-4.42144	1.12898e-05	5.6358e-05	2.75714
UBE2N	-0.747407	-0.00404989	-4.4487	9.98065e-06	5.04594e-05	2.87354
CXXC1	-0.747298	-0.010107	-4.42819	1.09509e-05	5.48319e-05	2.78592
NT5M	-0.747152	0.00784742	-4.4227	1.12258e-05	5.60668e-05	2.76251
RUSC1	0.746777	-0.00830061	4.42955	1.08842e-05	5.45766e-05	2.79169
AKAP11	-0.746634	0.0288077	-4.44835	9.99655e-06	5.0514e-05	2.87203
SLC7A8	0.746379	-0.00408702	4.41091	1.18377e-05	5.87369e-05	2.71241
C10orf88	0.746035	-0.0320422	4.41218	1.17703e-05	5.84905e-05	2.7178
HMOX2	0.745894	-0.0216518	4.4393	1.04148e-05	5.23597e-05	2.83332
SLC22A4	0.745826	0.038529	4.40406	1.22083e-05	6.04243e-05	2.68331
RNF19B	0.745655	0.0383735	4.41461	1.16425e-05	5.79136e-05	2.7281
SEPHS2	0.745541	-0.0450604	4.42453	1.11335e-05	5.56619e-05	2.7703
WNT2B	0.745375	0.0117169	4.39857	1.25127e-05	6.18381e-05	2.66007
TMEM132A	-0.745274	-0.00263963	-4.45867	9.53932e-06	4.8476e-05	2.91626
GRIA4	-0.744826	-0.00294425	-4.39762	1.25662e-05	6.20095e-05	2.65604
SLC35A5	-0.744733	0.00779015	-4.42728	1.09963e-05	5.50314e-05	2.78202
HNRNPUL1	-0.744644	0.0154225	-4.40314	1.22589e-05	6.06444e-05	2.67941
SGCE	0.744484	-0.0105994	4.39663	1.2622e-05	6.22539e-05	2.65186
TMSB4Y	-0.744197	-0.0120827	-4.40257	1.22903e-05	6.07696e-05	2.67699
ENDOG	-0.74418	0.0374911	-4.41364	1.16934e-05	5.81379e-05	2.72398
UBR7	-0.743954	-0.0399807	-4.41095	1.18356e-05	5.87369e-05	2.71257
TES	0.743708	-0.00790851	4.43823	1.04653e-05	5.25871e-05	2.82875
LDHC	0.74367	0.0127705	4.39779	1.25565e-05	6.19924e-05	2.65677
GALNT12	0.743207	0.00217974	4.39394	1.27757e-05	6.28863e-05	2.64044
MED8	0.742924	-0.0394694	4.40976	1.18992e-05	5.90128e-05	2.70751
ZNF22	-0.742893	0.0200761	-4.38329	1.33994e-05	6.5695e-05	2.59546
ASB13	-0.742617	-0.0555209	-4.44032	1.0367e-05	5.21991e-05	2.83767
[truncated: 2,924 more rows]
