# Supplementary material for: NF1 regulates mesenchymal glioblastoma plasticity and aggressiveness through the AP-1 transcription factor FOSL1
Source: eLife. 2021 Aug 17;10:e64846. doi: 10.7554/eLife.64846 (PMC8370767; doi:10.7554/eLife.64846)
Supplement: Supplementary file 3. [file elife-64846-supp3.xlsx]

## Sheet: Table_S3
# Supplementary File 3: MRA results
Regulon	Universe.Size	Regulon.Size	Total.Hits	Expected.Hits	Observed.Hits	Pvalue	Adjusted.Pvalue
FOSL1	9889	219	4922	109	218	8.4e-66	6.7e-63
VDR	9889	154	4922	76.65	152	8.3e-44	3.3e-41
OLIG2	9889	144	4922	71.67	143	1.2e-42	3.2e-40
SP100	9889	130	4922	64.7	130	1.7e-40	3.4e-38
ELF4	9889	132	4922	65.7	131	5.7e-39	9e-37
SOX11	9889	127	4922	63.21	126	1.9e-37	2.5e-35
BNC2	9889	109	4922	54.25	108	5.8e-32	6.6e-30
ASCL1	9889	98	4922	48.78	97	1.3e-28	1.3e-26
SALL2	9889	91	4922	45.29	90	1.7e-26	1.5e-24
POU3F3	9889	95	4922	47.28	93	5e-26	4e-24
TCF4	9889	75	4922	37.33	75	1.4e-23	1e-21
TCF3	9889	86	4922	42.8	84	2.4e-23	1.6e-21
FOXL1	9889	100	4922	49.77	95	2.7e-23	1.7e-21
PATZ1	9889	108	4922	53.75	101	3.8e-23	2.2e-21
IRF1	9889	78	4922	38.82	77	1.4e-22	7.3e-21
ZNF428	9889	76	4922	37.83	75	5.5e-22	2.7e-20
PLAGL1	9889	69	4922	34.34	69	9.7e-22	4.6e-20
OSR2	9889	84	4922	41.81	81	2.6e-21	1.2e-19
CTCF	9889	87	4922	43.3	83	7.7e-21	3.2e-19
MAFF	9889	65	4922	32.35	65	1.6e-20	6.5e-19
FOSL2	9889	118	4922	58.73	105	1e-19	3.8e-18
KLF5	9889	114	4922	56.74	102	1.3e-19	4.8e-18
ZBTB38	9889	78	4922	38.82	75	1.4e-19	5e-18
PPARG	9889	73	4922	36.33	71	1.6e-19	5.4e-18
TWIST1	9889	61	4922	30.36	61	2.7e-19	8.7e-18
RELB	9889	68	4922	33.85	66	4.8e-18	1.5e-16
RUNX3	9889	65	4922	32.35	63	3.6e-17	1.1e-15
STAT5A	9889	104	4922	51.76	92	4.9e-17	1.4e-15
ZNF254	9889	53	4922	26.38	53	7.6e-17	2.1e-15
ARNT2	9889	77	4922	38.32	72	8.2e-17	2.2e-15
DRAP1	9889	67	4922	33.35	64	2.1e-16	5.5e-15
SALL1	9889	83	4922	41.31	76	2.7e-16	6.5e-15
ZNF24	9889	57	4922	28.37	56	2.7e-16	6.5e-15
CEBPB	9889	50	4922	24.89	50	6.2e-16	1.5e-14
ZNF93	9889	48	4922	23.89	48	2.5e-15	5.8e-14
ZNF75D	9889	63	4922	31.36	60	3e-15	6.5e-14
RFX4	9889	47	4922	23.39	47	5.1e-15	1.1e-13
ZNF84	9889	52	4922	25.88	51	8.3e-15	1.7e-13
ADNP2	9889	72	4922	35.84	66	2.3e-14	4.7e-13
HIVEP2	9889	79	4922	39.32	71	3e-14	5.9e-13
ZNF219	9889	50	4922	24.89	49	3.2e-14	6.3e-13
TMF1	9889	85	4922	42.31	75	5.6e-14	1.1e-12
GATA6	9889	49	4922	24.39	48	6.4e-14	1.2e-12
HMGA2	9889	62	4922	30.86	58	8.7e-14	1.6e-12
THYN1	9889	53	4922	26.38	51	1.1e-13	2e-12
FOXC1	9889	41	4922	20.41	41	3.5e-13	6e-12
DPF1	9889	51	4922	25.38	49	4.3e-13	7.2e-12
ZNF273	9889	55	4922	27.37	52	5.5e-13	9.1e-12
NFKB1	9889	54	4922	26.88	51	1e-12	1.7e-11
NFKB2	9889	72	4922	35.84	64	1.9e-12	3e-11
RBCK1	9889	60	4922	29.86	55	3.6e-12	5.7e-11
ALX1	9889	90	4922	44.8	76	5.5e-12	8.4e-11
ZNF652	9889	37	4922	18.42	37	5.7e-12	8.5e-11
ZNF91	9889	63	4922	31.36	57	5.7e-12	8.5e-11
ZNF195	9889	47	4922	23.39	45	6e-12	8.7e-11
TCF12	9889	59	4922	29.37	54	6.7e-12	9.6e-11
ZFP30	9889	42	4922	20.9	41	7.5e-12	1e-10
ZNF473	9889	42	4922	20.9	41	7.5e-12	1e-10
PURA	9889	92	4922	45.79	77	1e-11	1.4e-10
NPAS3	9889	85	4922	42.31	72	1.5e-11	2e-10
STAT6	9889	45	4922	22.4	43	2.2e-11	2.9e-10
TFE3	9889	80	4922	39.82	68	4e-11	5.1e-10
HLX	9889	39	4922	19.41	38	5.7e-11	7.1e-10
VEZF1	9889	39	4922	19.41	38	5.7e-11	7.1e-10
PIN1	9889	59	4922	29.37	53	6.3e-11	7.7e-10
SCMH1	9889	72	4922	35.84	62	9.2e-11	1.1e-09
SP140L	9889	72	4922	35.84	62	9.2e-11	1.1e-09
ATF1	9889	47	4922	23.39	44	9.4e-11	1.1e-09
SOX4	9889	75	4922	37.33	64	1.1e-10	1.2e-09
TBPL1	9889	108	4922	53.75	86	1.2e-10	1.4e-09
CXXC4	9889	46	4922	22.9	43	1.8e-10	2e-09
ZNF682	9889	46	4922	22.9	43	1.8e-10	2e-09
POU3F2	9889	45	4922	22.4	42	3.4e-10	3.7e-09
CREB3L2	9889	56	4922	27.87	50	3.8e-10	4.1e-09
ZEB1	9889	59	4922	29.37	52	5e-10	5.3e-09
ZNF253	9889	51	4922	25.38	46	8.9e-10	9.3e-09
MYT1	9889	47	4922	23.39	43	1.1e-09	1.1e-08
SRF	9889	47	4922	23.39	43	1.1e-09	1.1e-08
NEUROG2	9889	54	4922	26.88	48	1.2e-09	1.2e-08
FOXN2	9889	50	4922	24.89	45	1.6e-09	1.6e-08
ZNF711	9889	50	4922	24.89	45	1.6e-09	1.6e-08
NFIB	9889	34	4922	16.92	33	1.7e-09	1.6e-08
ETS2	9889	85	4922	42.31	69	1.8e-09	1.7e-08
NFE2L3	9889	38	4922	18.91	36	2.2e-09	2.1e-08
ZNF444	9889	56	4922	27.87	49	2.8e-09	2.6e-08
VAX2	9889	49	4922	24.39	44	2.9e-09	2.7e-08
ELK3	9889	58	4922	28.87	50	5.9e-09	5.4e-08
GATA3	9889	32	4922	15.93	31	6.4e-09	5.8e-08
TBX3	9889	44	4922	21.9	40	6.8e-09	6.1e-08
ZNF43	9889	51	4922	25.38	45	7.1e-09	6.3e-08
ZNF3	9889	40	4922	19.91	37	7.9e-09	6.9e-08
ZNF426	9889	36	4922	17.92	34	8e-09	6.9e-08
ETV5	9889	47	4922	23.39	42	9.7e-09	8.2e-08
KLF2	9889	47	4922	23.39	42	9.7e-09	8.2e-08
PROX1	9889	112	4922	55.75	85	1.1e-08	9.6e-08
ARID3A	9889	39	4922	19.41	36	1.5e-08	1.2e-07
KLF15	9889	35	4922	17.42	33	1.5e-08	1.2e-07
KLF12	9889	65	4922	32.35	54	2.2e-08	1.8e-07
CAMTA2	9889	38	4922	18.91	35	2.7e-08	2.2e-07
PRDM8	9889	38	4922	18.91	35	2.7e-08	2.2e-07
ZNF250	9889	41	4922	20.41	37	4.2e-08	3.3e-07
ZNF629	9889	41	4922	20.41	37	4.2e-08	3.3e-07
PRRX2	9889	33	4922	16.42	31	5.5e-08	4.2e-07
ZNF544	9889	50	4922	24.89	43	8.3e-08	6.4e-07
PLAG1	9889	77	4922	38.32	61	8.8e-08	6.7e-07
SOX12	9889	43	4922	21.4	38	1e-07	7.6e-07
SOX21	9889	59	4922	29.37	49	1e-07	7.7e-07
ZSCAN16	9889	23	4922	11.45	23	1e-07	7.7e-07
ZBTB5	9889	39	4922	19.41	35	1.4e-07	1e-06
IRF5	9889	87	4922	43.3	67	1.5e-07	1.1e-06
NFYB	9889	35	4922	17.42	32	1.8e-07	1.3e-06
TP63	9889	136	4922	67.69	97	2.2e-07	1.6e-06
STAT4	9889	72	4922	35.84	57	2.5e-07	1.7e-06
SOX9	9889	41	4922	20.41	36	3.2e-07	2.3e-06
ZFX	9889	26	4922	12.94	25	3.5e-07	2.4e-06
ZNF85	9889	26	4922	12.94	25	3.5e-07	2.4e-06
MEF2D	9889	44	4922	21.9	38	3.9e-07	2.6e-06
ZBTB7A	9889	82	4922	40.81	63	4.2e-07	2.9e-06
FOXL2	9889	47	4922	23.39	40	4.4e-07	2.9e-06
CXXC1	9889	62	4922	30.86	50	4.7e-07	3.1e-06
MBNL2	9889	59	4922	29.37	48	4.9e-07	3.2e-06
RXRB	9889	56	4922	27.87	46	4.9e-07	3.2e-06
NR3C2	9889	61	4922	30.36	49	7.7e-07	5e-06
PHF1	9889	61	4922	30.36	49	7.7e-07	5e-06
ZNF510	9889	36	4922	17.92	32	8.2e-07	5.2e-06
NKX2-2	9889	20	4922	9.95	20	8.5e-07	5.4e-06
ZNF606	9889	20	4922	9.95	20	8.5e-07	5.4e-06
CREB3	9889	72	4922	35.84	56	9.2e-07	5.7e-06
FOSB	9889	39	4922	19.41	34	1e-06	6.3e-06
MEF2A	9889	32	4922	15.93	29	1.1e-06	6.7e-06
ZBTB7B	9889	85	4922	42.31	64	1.2e-06	7.4e-06
HOXA1	9889	65	4922	32.35	51	1.8e-06	1.1e-05
ADNP	9889	38	4922	18.91	33	1.8e-06	1.1e-05
ATMIN	9889	47	4922	23.39	39	2.3e-06	1.4e-05
INSM1	9889	34	4922	16.92	30	2.6e-06	1.6e-05
CREB1	9889	37	4922	18.42	32	3.2e-06	1.8e-05
MYCN	9889	18	4922	8.96	18	3.5e-06	2e-05
DEAF1	9889	49	4922	24.39	40	3.8e-06	2.2e-05
E2F3	9889	46	4922	22.9	38	3.8e-06	2.2e-05
MSX2	9889	49	4922	24.39	40	3.8e-06	2.2e-05
RUNX2	9889	46	4922	22.9	38	3.8e-06	2.2e-05
ZNF146	9889	74	4922	36.83	56	4.3e-06	2.4e-05
DLX4	9889	51	4922	25.38	41	6.1e-06	3.4e-05
SGSM2	9889	42	4922	20.9	35	6.4e-06	3.5e-05
GATAD2A	9889	59	4922	29.37	46	7.8e-06	4.3e-05
CREB5	9889	56	4922	27.87	44	8.5e-06	4.7e-05
E2F2	9889	75	4922	37.33	56	8.8e-06	4.8e-05
CLOCK	9889	53	4922	26.38	42	9.3e-06	5e-05
BPTF	9889	35	4922	17.42	30	9.7e-06	5.2e-05
RARG	9889	147	4922	73.17	99	1.1e-05	5.7e-05
ARNTL2	9889	90	4922	44.8	65	1.1e-05	6e-05
ZNF493	9889	16	4922	7.96	16	1.4e-05	7.3e-05
FLI1	9889	76	4922	37.83	56	1.7e-05	9e-05
SOX5	9889	37	4922	18.42	31	1.8e-05	9.2e-05
ETV1	9889	40	4922	19.91	33	1.8e-05	9.3e-05
AHR	9889	65	4922	32.35	49	2.1e-05	0.00011
HMBOX1	9889	27	4922	13.44	24	2.2e-05	0.00011
NR3C1	9889	48	4922	23.89	38	2.6e-05	0.00013
MSC	9889	30	4922	14.93	26	2.6e-05	0.00013
ONECUT2	9889	45	4922	22.4	36	2.8e-05	0.00014
ZNF215	9889	33	4922	16.42	28	2.9e-05	0.00014
CSRNP3	9889	56	4922	27.87	43	3e-05	0.00015
DDIT3	9889	36	4922	17.92	30	3e-05	0.00015
KLF9	9889	23	4922	11.45	21	3e-05	0.00015
ZNF337	9889	39	4922	19.41	32	3e-05	0.00015
ZNF696	9889	36	4922	17.92	30	3e-05	0.00015
NR4A2	9889	61	4922	30.36	46	3.6e-05	0.00017
ZEB2	9889	50	4922	24.89	39	3.8e-05	0.00018
WT1	9889	63	4922	31.36	47	4.8e-05	0.00023
MYBL2	9889	73	4922	36.33	53	5.7e-05	0.00027
E2F5	9889	65	4922	32.35	48	6.3e-05	0.00029
TFAP2C	9889	18	4922	8.96	17	6.7e-05	0.00031
KLF11	9889	37	4922	18.42	30	8.4e-05	0.00038
ZNF821	9889	56	4922	27.87	42	9.9e-05	0.00045
ZNF669	9889	21	4922	10.45	19	0.0001	0.00046
JRKL	9889	53	4922	26.38	40	0.00011	0.00052
PBX2	9889	42	4922	20.9	33	0.00012	0.00053
ZNF480	9889	36	4922	17.92	29	0.00014	0.00062
NPAS2	9889	33	4922	16.42	27	0.00014	0.00064
HMGA1	9889	117	4922	58.23	78	0.00015	0.00067
GABPA	9889	90	4922	44.8	62	0.00018	0.00077
SPEN	9889	54	4922	26.88	40	0.00023	0.001
MBD3	9889	46	4922	22.9	35	0.00023	0.001
SETDB1	9889	46	4922	22.9	35	0.00023	0.001
ZNF34	9889	16	4922	7.96	15	0.00024	0.001
GFI1	9889	51	4922	25.38	38	0.00027	0.0011
FOXG1	9889	40	4922	19.91	31	0.0003	0.0013
LHX2	9889	40	4922	19.91	31	0.0003	0.0013
ZNF227	9889	19	4922	9.46	17	0.00034	0.0014
MEIS1	9889	34	4922	16.92	27	0.00037	0.0015
ZNF277	9889	58	4922	28.87	42	0.00037	0.0015
FOXC2	9889	15	4922	7.47	14	0.00046	0.0019
THAP10	9889	15	4922	7.47	14	0.00046	0.0019
ZBTB39	9889	15	4922	7.47	14	0.00046	0.0019
ZHX3	9889	39	4922	19.41	30	0.00047	0.0019
AKAP8L	9889	47	4922	23.39	35	0.00047	0.0019
BAZ2A	9889	44	4922	21.9	33	0.00055	0.0022
ZNF562	9889	67	4922	33.35	47	0.00055	0.0022
NKX6-1	9889	18	4922	8.96	16	0.00061	0.0024
ZNF430	9889	41	4922	20.41	31	0.00064	0.0026
HEY2	9889	21	4922	10.45	18	0.00069	0.0027
ZIC1	9889	81	4922	40.32	55	0.0007	0.0028
SATB2	9889	24	4922	11.95	20	0.00071	0.0028
BBX	9889	46	4922	22.9	34	0.00072	0.0028
PAX2	9889	97	4922	48.28	64	0.00088	0.0034
ZNF202	9889	48	4922	23.89	35	0.00092	0.0035
TBX19	9889	68	4922	33.85	47	0.00093	0.0036
GPBP1L1	9889	80	4922	39.82	54	0.00097	0.0037
FOXJ3	9889	40	4922	19.91	30	0.00099	0.0038
CIC	9889	87	4922	43.3	58	0.001	0.0039
PHF21A	9889	29	4922	14.43	23	0.0011	0.004
ZNF235	9889	17	4922	8.46	15	0.0011	0.0041
ZNF107	9889	23	4922	11.45	19	0.0012	0.0045
STAT2	9889	91	4922	45.29	60	0.0013	0.0048
ARNT	9889	34	4922	16.92	26	0.0013	0.0049
POGK	9889	118	4922	58.73	75	0.0017	0.0061
STAT1	9889	78	4922	38.82	52	0.0018	0.0068
MLX	9889	129	4922	64.21	81	0.0019	0.0068
ZNF248	9889	16	4922	7.96	14	0.002	0.0071
PBX1	9889	46	4922	22.9	33	0.002	0.0072
RORB	9889	46	4922	22.9	33	0.002	0.0072
SP4	9889	46	4922	22.9	33	0.002	0.0072
NFAT5	9889	53	4922	26.38	37	0.0024	0.0086
PLSCR1	9889	43	4922	21.4	31	0.0024	0.0086
ZHX2	9889	35	4922	17.42	26	0.0027	0.0096
KDM5B	9889	45	4922	22.4	32	0.003	0.01
TFEB	9889	37	4922	18.42	27	0.0035	0.012
ZFP37	9889	18	4922	8.96	15	0.0035	0.012
ZBED4	9889	92	4922	45.79	59	0.0037	0.013
MAFG	9889	78	4922	38.82	51	0.0038	0.013
TRAFD1	9889	44	4922	21.9	31	0.0043	0.015
ZNF282	9889	46	4922	22.9	32	0.0051	0.018
JUND	9889	17	4922	8.46	14	0.006	0.021
ZNF287	9889	38	4922	18.91	27	0.0063	0.022
REL	9889	50	4922	24.89	34	0.0069	0.023
ZNF334	9889	35	4922	17.42	25	0.0077	0.026
ZBTB7C	9889	59	4922	29.37	39	0.0082	0.027
ESRRA	9889	125	4922	62.22	76	0.0082	0.028
ZNF124	9889	19	4922	9.46	15	0.0091	0.03
ERF	9889	32	4922	15.93	23	0.0093	0.031
SP110	9889	32	4922	15.93	23	0.0093	0.031
PPARA	9889	49	4922	24.39	33	0.0096	0.032
HIC1	9889	56	4922	27.87	37	0.01	0.033
PAX8	9889	58	4922	28.87	38	0.011	0.036
ZNF358	9889	34	4922	16.92	24	0.011	0.036
ZNF143	9889	46	4922	22.9	31	0.012	0.038
ZNF35	9889	46	4922	22.9	31	0.012	0.038
BAZ2B	9889	41	4922	20.41	28	0.013	0.04
ZNF26	9889	41	4922	20.41	28	0.013	0.04
SAFB	9889	71	4922	35.34	45	0.014	0.045
MAFB	9889	50	4922	24.89	33	0.015	0.047
CSRNP2	9889	38	4922	18.91	26	0.015	0.049
RFX2	9889	38	4922	18.91	26	0.015	0.049
ZNF14	9889	23	4922	11.45	17	0.016	0.051
MYB	9889	115	4922	57.24	69	0.017	0.053
ATF6B	9889	40	4922	19.91	27	0.018	0.055
MEOX2	9889	40	4922	19.91	27	0.018	0.055
ZNF345	9889	40	4922	19.91	27	0.018	0.055
JUNB	9889	54	4922	26.88	35	0.018	0.056
SLC2A4RG	9889	108	4922	53.75	65	0.019	0.057
FOS	9889	30	4922	14.93	21	0.02	0.061
DPF3	9889	42	4922	20.9	28	0.02	0.061
ETV7	9889	65	4922	32.35	41	0.021	0.063
NFIL3	9889	37	4922	18.42	25	0.022	0.066
ZNF365	9889	153	4922	76.15	89	0.022	0.066
FOXO1	9889	17	4922	8.46	13	0.023	0.07
ZNF324	9889	32	4922	15.93	22	0.023	0.07
HMG20A	9889	39	4922	19.41	26	0.025	0.073
ZNF280A	9889	39	4922	19.41	26	0.025	0.073
ZNF74	9889	82	4922	40.81	50	0.027	0.079
THAP1	9889	95	4922	47.28	57	0.028	0.084
ZNF580	9889	66	4922	32.85	41	0.029	0.085
GATA4	9889	36	4922	17.92	24	0.03	0.089
RFX7	9889	43	4922	21.4	28	0.031	0.089
HBP1	9889	79	4922	39.32	48	0.032	0.093
PRDM5	9889	81	4922	40.32	49	0.034	0.097
DMTF1	9889	56	4922	27.87	35	0.037	0.11
NFE2	9889	56	4922	27.87	35	0.037	0.11
AKAP8	9889	40	4922	19.91	26	0.038	0.11
POU2F1	9889	40	4922	19.91	26	0.038	0.11
SNAI2	9889	40	4922	19.91	26	0.038	0.11
ZNF549	9889	33	4922	16.42	22	0.038	0.11
HMG20B	9889	58	4922	28.87	36	0.04	0.11
NCOA1	9889	51	4922	25.38	32	0.043	0.12
ZBED5	9889	23	4922	11.45	16	0.044	0.12
MNX1	9889	37	4922	18.42	24	0.046	0.13
TEF	9889	64	4922	31.85	39	0.047	0.13
DZIP1	9889	55	4922	27.37	34	0.048	0.13
DR1	9889	66	4922	32.85	40	0.05	0.14
ZFHX2	9889	39	4922	19.41	25	0.051	0.14
HHEX	9889	57	4922	28.37	35	0.051	0.14
HOXC4	9889	32	4922	15.93	21	0.052	0.14
NKX3-1	9889	15	4922	7.47	11	0.057	0.15
ZNF184	9889	15	4922	7.47	11	0.057	0.15
ZNF22	9889	22	4922	10.95	15	0.064	0.17
PDX1	9889	121	4922	60.22	69	0.065	0.17
HAND2	9889	38	4922	18.91	24	0.068	0.18
NHLH1	9889	58	4922	28.87	35	0.069	0.18
NFATC3	9889	40	4922	19.91	25	0.072	0.19
NPAS1	9889	40	4922	19.91	25	0.072	0.19
PAX4	9889	40	4922	19.91	25	0.072	0.19
SAFB2	9889	40	4922	19.91	25	0.072	0.19
RFX3	9889	42	4922	20.9	26	0.077	0.2
E2F4	9889	90	4922	44.8	52	0.078	0.2
KLF10	9889	44	4922	21.9	27	0.082	0.21
SIX5	9889	35	4922	17.42	22	0.083	0.22
ATF6	9889	132	4922	65.7	74	0.086	0.22
WIZ	9889	37	4922	18.42	23	0.089	0.23
SNAI1	9889	59	4922	29.37	35	0.09	0.23
ZNF354A	9889	50	4922	24.89	30	0.095	0.24
ZNF674	9889	30	4922	14.93	19	0.096	0.24
ZFY	9889	32	4922	15.93	20	0.1	0.26
CGGBP1	9889	18	4922	8.96	12	0.11	0.29
CHCHD3	9889	109	4922	54.25	61	0.11	0.29
FOXD2	9889	18	4922	8.96	12	0.11	0.29
E4F1	9889	36	4922	17.92	22	0.12	0.29
CREM	9889	38	4922	18.91	23	0.12	0.31
BACH2	9889	20	4922	9.95	13	0.13	0.32
STAT5B	9889	20	4922	9.95	13	0.13	0.32
IRX5	9889	40	4922	19.91	24	0.13	0.32
MXD3	9889	42	4922	20.9	25	0.13	0.33
CREBL2	9889	72	4922	35.84	41	0.13	0.33
NR2E1	9889	31	4922	15.43	19	0.13	0.33
TTF1	9889	59	4922	29.37	34	0.14	0.34
PLAGL2	9889	33	4922	16.42	20	0.14	0.35
PRDM12	9889	26	4922	12.94	16	0.16	0.38
ATF7	9889	54	4922	26.88	31	0.16	0.39
ETV4	9889	17	4922	8.46	11	0.16	0.39
LTF	9889	119	4922	59.23	65	0.17	0.4
ZBTB33	9889	19	4922	9.46	12	0.17	0.42
ZNF12	9889	32	4922	15.93	19	0.18	0.44
DLX6	9889	47	4922	23.39	27	0.18	0.44
ZKSCAN5	9889	38	4922	18.91	22	0.2	0.48
SMAD4	9889	25	4922	12.44	15	0.21	0.49
XBP1	9889	84	4922	41.81	46	0.21	0.5
PRDM16	9889	46	4922	22.9	26	0.22	0.52
THAP9	9889	16	4922	7.96	10	0.22	0.52
ETV6	9889	48	4922	23.89	27	0.23	0.53
FOXF1	9889	33	4922	16.42	19	0.23	0.55
TIGD6	9889	79	4922	39.32	43	0.24	0.55
ZNF132	9889	35	4922	17.42	20	0.24	0.56
TSC22D1	9889	163	4922	81.13	86	0.25	0.57
GTF2IRD1	9889	60	4922	29.86	33	0.25	0.57
PPARD	9889	60	4922	29.86	33	0.25	0.57
NKX2-8	9889	91	4922	45.29	49	0.25	0.58
ZNF212	9889	22	4922	10.95	13	0.25	0.59
ZKSCAN1	9889	68	4922	33.85	37	0.26	0.59
MBD2	9889	24	4922	11.95	14	0.26	0.6
SOX1	9889	24	4922	11.95	14	0.26	0.6
DOT1L	9889	32	4922	15.93	18	0.29	0.66
MLXIP	9889	34	4922	16.92	19	0.29	0.67
EGR1	9889	15	4922	7.47	9	0.3	0.67
GBX2	9889	67	4922	33.35	36	0.3	0.67
ZNF268	9889	36	4922	17.92	20	0.3	0.67
ZNF688	9889	17	4922	8.46	10	0.31	0.69
FOXA1	9889	42	4922	20.9	23	0.31	0.69
RREB1	9889	42	4922	20.9	23	0.31	0.69
CBX2	9889	48	4922	23.89	26	0.32	0.71
ESR2	9889	21	4922	10.45	12	0.32	0.72
GTF2B	9889	97	4922	48.28	51	0.33	0.72
PRDM1	9889	97	4922	48.28	51	0.33	0.72
CASZ1	9889	23	4922	11.45	13	0.33	0.73
ZKSCAN4	9889	25	4922	12.44	14	0.34	0.74
BNC1	9889	64	4922	31.85	34	0.34	0.74
DLX2	9889	27	4922	13.44	15	0.34	0.74
RLF	9889	27	4922	13.44	15	0.34	0.74
LMX1B	9889	43	4922	21.4	23	0.37	0.8
ETV2	9889	45	4922	22.4	24	0.37	0.8
CUX1	9889	51	4922	25.38	27	0.38	0.81
THRA	9889	53	4922	26.38	28	0.38	0.82
TRPS1	9889	16	4922	7.96	9	0.39	0.84
ZBTB10	9889	16	4922	7.96	9	0.39	0.84
PAX9	9889	18	4922	8.96	10	0.4	0.85
SKIL	9889	24	4922	11.95	13	0.41	0.87
ZNF571	9889	30	4922	14.93	16	0.42	0.89
SMAD9	9889	34	4922	16.92	18	0.42	0.89
ZNF276	9889	38	4922	18.91	20	0.42	0.89
IRF7	9889	40	4922	19.91	21	0.43	0.89
TERF2	9889	40	4922	19.91	21	0.43	0.89
ZNF236	9889	42	4922	20.9	22	0.43	0.89
TFDP2	9889	48	4922	23.89	25	0.43	0.9
NFYC	9889	60	4922	29.86	31	0.43	0.91
ZFHX3	9889	68	4922	33.85	35	0.44	0.91
ZNF157	9889	66	4922	32.85	34	0.44	0.91
PAX3	9889	89	4922	44.3	45	0.48	0.99
BARX1	9889	45	4922	22.4	23	0.49	0.99
FOXA2	9889	33	4922	16.42	17	0.49	0.99
FOXO4	9889	33	4922	16.42	17	0.49	0.99
GLI2	9889	39	4922	19.41	20	0.49	0.99
HIC2	9889	17	4922	8.46	9	0.49	0.99
HOXA2	9889	19	4922	9.46	10	0.49	0.99
JRK	9889	35	4922	17.42	18	0.49	0.99
PRDM4	9889	35	4922	17.42	18	0.49	0.99
SOX13	9889	17	4922	8.46	9	0.49	0.99
ZNF329	9889	39	4922	19.41	20	0.49	0.99
ZNF7	9889	19	4922	9.46	10	0.49	0.99
JUN	9889	90	4922	44.8	45	0.52	1
FOXO3	9889	88	4922	43.8	44	0.53	1
TFCP2L1	9889	48	4922	23.89	24	0.54	1
GATA2	9889	42	4922	20.9	21	0.55	1
HOXD10	9889	46	4922	22.9	23	0.55	1
MBD1	9889	42	4922	20.9	21	0.55	1
SMAD5	9889	46	4922	22.9	23	0.55	1
TAL1	9889	44	4922	21.9	22	0.55	1
HIVEP1	9889	32	4922	15.93	16	0.56	1
HINFP	9889	16	4922	7.96	8	0.59	1
HSF2	9889	57	4922	28.37	28	0.59	1
RELA	9889	55	4922	27.37	27	0.59	1
ZFHX4	9889	49	4922	24.39	24	0.6	1
TFCP2	9889	43	4922	21.4	21	0.61	1
HNF4G	9889	72	4922	35.84	35	0.62	1
FOXN3	9889	70	4922	34.84	34	0.63	1
FOXM1	9889	103	4922	51.27	50	0.64	1
NFE2L1	9889	156	4922	77.65	76	0.64	1
ZNF136	9889	27	4922	13.44	13	0.64	1
MECP2	9889	48	4922	23.89	23	0.66	1
ZNF155	9889	19	4922	9.46	9	0.67	1
ZBTB17	9889	17	4922	8.46	8	0.68	1
EEA1	9889	15	4922	7.47	7	0.69	1
ZNF467	9889	15	4922	7.47	7	0.69	1
ZNF623	9889	15	4922	7.47	7	0.69	1
ZNF787	9889	88	4922	43.8	42	0.69	1
ZNF79	9889	15	4922	7.47	7	0.69	1
ISL1	9889	82	4922	40.81	39	0.7	1
RBPJ	9889	51	4922	25.38	24	0.7	1
ZNF281	9889	30	4922	14.93	14	0.7	1
TCF7	9889	72	4922	35.84	34	0.71	1
HAND1	9889	24	4922	11.95	11	0.72	1
ZNF267	9889	24	4922	11.95	11	0.72	1
ZSCAN12	9889	24	4922	11.95	11	0.72	1
FOXD3	9889	58	4922	28.87	27	0.73	1
NACC2	9889	39	4922	19.41	18	0.73	1
RAG1	9889	39	4922	19.41	18	0.73	1
ZNF16	9889	22	4922	10.95	10	0.73	1
SP1	9889	56	4922	27.87	26	0.74	1
TEAD4	9889	129	4922	64.21	61	0.74	1
POU3F4	9889	33	4922	16.42	15	0.75	1
PITX2	9889	31	4922	15.43	14	0.76	1
CREBZF	9889	42	4922	20.9	19	0.77	1
PURG	9889	42	4922	20.9	19	0.77	1
HOXA7	9889	40	4922	19.91	18	0.78	1
ZNF232	9889	72	4922	35.84	33	0.78	1
IRF2	9889	51	4922	25.38	23	0.79	1
NFATC4	9889	68	4922	33.85	31	0.79	1
NCOA3	9889	32	4922	15.93	14	0.8	1
CDX1	9889	163	4922	81.13	76	0.81	1
GMEB2	9889	30	4922	14.93	13	0.81	1
MITF	9889	60	4922	29.86	27	0.81	1
ZNF574	9889	39	4922	19.41	17	0.82	1
ZNF609	9889	54	4922	26.88	24	0.82	1
PITX1	9889	17	4922	8.46	7	0.83	1
ZNF140	9889	37	4922	18.42	16	0.83	1
CENPB	9889	35	4922	17.42	15	0.84	1
PHF20	9889	35	4922	17.42	15	0.84	1
ATF5	9889	15	4922	7.47	6	0.85	1
FOXF2	9889	31	4922	15.43	13	0.85	1
IRF3	9889	42	4922	20.9	18	0.85	1
NRF1	9889	33	4922	16.42	14	0.85	1
PROP1	9889	89	4922	44.3	40	0.85	1
SIX6	9889	15	4922	7.47	6	0.85	1
USF2	9889	42	4922	20.9	18	0.85	1
ZNF239	9889	44	4922	21.9	19	0.85	1
ZNF587	9889	31	4922	15.43	13	0.85	1
RFX1	9889	20	4922	9.95	8	0.86	1
ARID5B	9889	34	4922	16.92	14	0.88	1
CC2D1A	9889	18	4922	8.96	7	0.88	1
CEBPD	9889	97	4922	48.28	43	0.88	1
HES2	9889	80	4922	39.82	35	0.88	1
SOX17	9889	25	4922	12.44	10	0.88	1
TFAP4	9889	71	4922	35.34	31	0.88	1
ZFPM2	9889	25	4922	12.44	10	0.88	1
ZNF117	9889	54	4922	26.88	23	0.88	1
ZNF611	9889	18	4922	8.96	7	0.88	1
AEBP1	9889	93	4922	46.29	41	0.89	1
SIX1	9889	23	4922	11.45	9	0.89	1
TGIF1	9889	16	4922	7.96	6	0.89	1
TOPORS	9889	16	4922	7.96	6	0.89	1
ZBTB25	9889	102	4922	50.77	45	0.89	1
ZNF32	9889	63	4922	31.36	27	0.89	1
ZNF665	9889	16	4922	7.96	6	0.89	1
LEF1	9889	21	4922	10.45	8	0.9	1
THAP3	9889	48	4922	23.89	20	0.9	1
ZNF592	9889	59	4922	29.37	25	0.9	1
ZNF717	9889	28	4922	13.94	11	0.9	1
FEV	9889	35	4922	17.42	14	0.91	1
IRF6	9889	33	4922	16.42	13	0.91	1
MGA	9889	35	4922	17.42	14	0.91	1
NFIX	9889	53	4922	26.38	22	0.91	1
TCF15	9889	62	4922	30.86	26	0.91	1
ZNF442	9889	19	4922	9.46	7	0.91	1
ZNF471	9889	26	4922	12.94	10	0.91	1
PRDM2	9889	38	4922	18.91	15	0.92	1
SOX3	9889	38	4922	18.91	15	0.92	1
TBX1	9889	40	4922	19.91	16	0.92	1
TBX2	9889	31	4922	15.43	12	0.92	1
FOXJ1	9889	52	4922	25.88	21	0.93	1
HMGN3	9889	17	4922	8.46	6	0.93	1
SETBP1	9889	102	4922	50.77	44	0.93	1
TLX1	9889	29	4922	14.43	11	0.93	1
ZNF189	9889	52	4922	25.88	21	0.93	1
ZNF484	9889	17	4922	8.46	6	0.93	1
ZNF83	9889	43	4922	21.4	17	0.93	1
CENPT	9889	34	4922	16.92	13	0.94	1
HNF4A	9889	103	4922	51.27	44	0.94	1
LYL1	9889	59	4922	29.37	24	0.94	1
ZBTB6	9889	32	4922	15.93	12	0.94	1
ZNF197	9889	48	4922	23.89	19	0.94	1
ZNF318	9889	68	4922	33.85	28	0.94	1
ZNF408	9889	39	4922	19.41	15	0.94	1
ZNF551	9889	121	4922	60.22	52	0.94	1
EPAS1	9889	89	4922	44.3	37	0.95	1
MYBL1	9889	73	4922	36.33	30	0.95	1
MYNN	9889	46	4922	22.9	18	0.95	1
NCOA2	9889	18	4922	8.96	6	0.95	1
TEAD1	9889	44	4922	21.9	17	0.95	1
ZNF692	9889	49	4922	24.39	19	0.95	1
ANKZF1	9889	54	4922	26.88	21	0.96	1
AR	9889	40	4922	19.91	15	0.96	1
EBF2	9889	45	4922	22.4	17	0.96	1
EMX2	9889	86	4922	42.8	35	0.96	1
GLI1	9889	45	4922	22.4	17	0.96	1
KLF7	9889	52	4922	25.88	20	0.96	1
MAX	9889	81	4922	40.32	33	0.96	1
UBP1	9889	65	4922	32.35	26	0.96	1
ZBTB20	9889	86	4922	42.8	35	0.96	1
ZBTB40	9889	16	4922	7.96	5	0.96	1
ZNF76	9889	26	4922	12.94	9	0.96	1
BATF	9889	27	4922	13.44	9	0.97	1
FOXH1	9889	24	4922	11.95	8	0.97	1
HEY1	9889	103	4922	51.27	42	0.97	1
HMX1	9889	39	4922	19.41	14	0.97	1
NR1H4	9889	17	4922	8.46	5	0.97	1
NR1I3	9889	29	4922	14.43	10	0.97	1
POU2F3	9889	46	4922	22.9	17	0.97	1
RARA	9889	67	4922	33.35	26	0.97	1
SNAPC2	9889	46	4922	22.9	17	0.97	1
SREBF1	9889	44	4922	21.9	16	0.97	1
TBP	9889	53	4922	26.38	20	0.97	1
TERF1	9889	62	4922	30.86	24	0.97	1
ZNF207	9889	107	4922	53.26	44	0.97	1
ATOH1	9889	62	4922	30.86	23	0.98	1
EGR2	9889	45	4922	22.4	16	0.98	1
ELK1	9889	42	4922	20.9	15	0.98	1
ETS1	9889	81	4922	40.32	32	0.98	1
HIVEP3	9889	93	4922	46.29	37	0.98	1
HOXB2	9889	38	4922	18.91	13	0.98	1
OVOL2	9889	25	4922	12.44	8	0.98	1
PRRX1	9889	204	4922	101.54	87	0.98	1
SOX30	9889	57	4922	28.37	21	0.98	1
ZBTB1	9889	61	4922	30.36	23	0.98	1
ZNF33B	9889	18	4922	8.96	5	0.98	1
ZXDC	9889	52	4922	25.88	19	0.98	1
ASH1L	9889	28	4922	13.94	8	0.99	1
ATF2	9889	54	4922	26.88	19	0.99	1
BARX2	9889	49	4922	24.39	17	0.99	1
E2F1	9889	60	4922	29.86	21	0.99	1
EGR4	9889	51	4922	25.38	18	0.99	1
ELK4	9889	55	4922	27.37	19	0.99	1
ESR1	9889	73	4922	36.33	27	0.99	1
HOXB13	9889	39	4922	19.41	13	0.99	1
HSF1	9889	51	4922	25.38	17	0.99	1
IKZF5	9889	56	4922	27.87	20	0.99	1
IRX4	9889	39	4922	19.41	12	0.99	1
MEF2C	9889	16	4922	7.96	4	0.99	1
MTF1	9889	47	4922	23.39	16	0.99	1
NEUROG1	9889	29	4922	14.43	9	0.99	1
NFX1	9889	19	4922	9.46	5	0.99	1
NR5A1	9889	20	4922	9.95	5	0.99	1
RORC	9889	95	4922	47.28	36	0.99	1
RXRA	9889	44	4922	21.9	14	0.99	1
SOHLH2	9889	25	4922	12.44	7	0.99	1
TCF21	9889	102	4922	50.77	39	0.99	1
TCFL5	9889	45	4922	22.4	15	0.99	1
TP73	9889	39	4922	19.41	12	0.99	1
VENTX	9889	59	4922	29.37	21	0.99	1
ZBTB11	9889	31	4922	15.43	9	0.99	1
ZNF214	9889	38	4922	18.91	12	0.99	1
ZNF225	9889	39	4922	19.41	12	0.99	1
ZNF257	9889	53	4922	26.38	19	0.99	1
ZNF264	9889	17	4922	8.46	4	0.99	1
ZNF394	9889	67	4922	33.35	25	0.99	1
ZNF395	9889	61	4922	30.36	22	0.99	1
ZNF536	9889	51	4922	25.38	17	0.99	1
ZNF639	9889	58	4922	28.87	21	0.99	1
AHCTF1	9889	104	4922	51.76	33	1	1
AHDC1	9889	72	4922	35.84	25	1	1
AIRE	9889	146	4922	72.67	54	1	1
ALX3	9889	132	4922	65.7	25	1	1
ALX4	9889	59	4922	29.37	11	1	1
ARID5A	9889	35	4922	17.42	7	1	1
ARNTL	9889	26	4922	12.94	7	1	1
ASCL3	9889	131	4922	65.2	16	1	1
BACH1	9889	19	4922	9.46	4	1	1
BCL11B	9889	40	4922	19.91	12	1	1
BCL6	9889	114	4922	56.74	31	1	1
BRF2	9889	69	4922	34.34	20	1	1
CDC5L	9889	191	4922	95.07	58	1	1
CDX2	9889	15	4922	7.47	1	1	1
CEBPE	9889	42	4922	20.9	8	1	1
CEBPG	9889	100	4922	49.77	37	1	1
CEBPZ	9889	113	4922	56.24	20	1	1
CENPA	9889	362	4922	180.18	73	1	1
CREB3L1	9889	62	4922	30.86	17	1	1
CRX	9889	131	4922	65.2	30	1	1
CUX2	9889	60	4922	29.86	2	1	1
DBP	9889	29	4922	14.43	7	1	1
DMRT1	9889	18	4922	8.96	3	1	1
DNMT1	9889	187	4922	93.07	57	1	1
E2F8	9889	84	4922	41.81	22	1	1
EGR3	9889	28	4922	13.94	2	1	1
EHF	9889	213	4922	106.02	70	1	1
ELF1	9889	74	4922	36.83	24	1	1
ELF2	9889	68	4922	33.85	19	1	1
ELF5	9889	111	4922	55.25	37	1	1
EMX1	9889	85	4922	42.31	29	1	1
ERG	9889	125	4922	62.22	27	1	1
ESRRG	9889	77	4922	38.32	19	1	1
ETV3	9889	44	4922	21.9	8	1	1
EVX1	9889	42	4922	20.9	11	1	1
FEZF2	9889	42	4922	20.9	7	1	1
FOXB1	9889	67	4922	33.35	12	1	1
FOXE1	9889	60	4922	29.86	6	1	1
FOXE3	9889	93	4922	46.29	26	1	1
FOXI1	9889	83	4922	41.31	17	1	1
FOXK2	9889	70	4922	34.84	24	1	1
FOXP3	9889	54	4922	26.88	9	1	1
GATA1	9889	174	4922	86.6	24	1	1
GCM1	9889	105	4922	52.26	21	1	1
GCM2	9889	69	4922	34.34	20	1	1
GFI1B	9889	70	4922	34.84	12	1	1
GLI3	9889	92	4922	45.79	24	1	1
GMEB1	9889	103	4922	51.27	26	1	1
GRHL2	9889	95	4922	47.28	18	1	1
GSC2	9889	67	4922	33.35	14	1	1
GTF3A	9889	270	4922	134.39	77	1	1
HESX1	9889	32	4922	15.93	6	1	1
HEYL	9889	44	4922	21.9	7	1	1
HIF3A	9889	172	4922	85.61	29	1	1
HLF	9889	41	4922	20.41	12	1	1
HNF1A	9889	29	4922	14.43	6	1	1
HOXA3	9889	22	4922	10.95	5	1	1
HOXB3	9889	48	4922	23.89	8	1	1
HOXD9	9889	32	4922	15.93	9	1	1
HSF4	9889	54	4922	26.88	13	1	1
IKZF1	9889	195	4922	97.06	38	1	1
IKZF3	9889	57	4922	28.37	12	1	1
IRF4	9889	113	4922	56.24	10	1	1
IRF8	9889	39	4922	19.41	9	1	1
KCMF1	9889	93	4922	46.29	31	1	1
KIN	9889	82	4922	40.81	22	1	1
KLF1	9889	70	4922	34.84	14	1	1
KLF3	9889	37	4922	18.42	4	1	1
KLF6	9889	59	4922	29.37	20	1	1
KLF8	9889	93	4922	46.29	17	1	1
LBX1	9889	60	4922	29.86	11	1	1
LHX3	9889	84	4922	41.81	18	1	1
LHX5	9889	48	4922	23.89	9	1	1
MAF	9889	99	4922	49.27	24	1	1
MAZ	9889	50	4922	24.89	15	1	1
MBD4	9889	126	4922	62.71	39	1	1
MEIS2	9889	32	4922	15.93	7	1	1
MEOX1	9889	73	4922	36.33	19	1	1
MLXIPL	9889	41	4922	20.41	6	1	1
MNT	9889	36	4922	17.92	10	1	1
MTF2	9889	67	4922	33.35	21	1	1
MXD1	9889	63	4922	31.36	16	1	1
MXI1	9889	58	4922	28.87	19	1	1
MYC	9889	92	4922	45.79	21	1	1
MYOD1	9889	76	4922	37.83	11	1	1
MYOG	9889	76	4922	37.83	25	1	1
MYT1L	9889	62	4922	30.86	16	1	1
NEUROD2	9889	108	4922	53.75	11	1	1
NEUROD6	9889	75	4922	37.33	15	1	1
NFATC1	9889	16	4922	7.96	3	1	1
NFE2L2	9889	83	4922	41.31	24	1	1
NFIC	9889	65	4922	32.35	22	1	1
NFYA	9889	76	4922	37.83	21	1	1
NHLH2	9889	61	4922	30.36	12	1	1
NKRF	9889	274	4922	136.38	105	1	1
NR1D2	9889	95	4922	47.28	30	1	1
NR1I2	9889	70	4922	34.84	13	1	1
NR2C1	9889	15	4922	7.47	3	1	1
NR2C2	9889	53	4922	26.38	15	1	1
NR2F6	9889	113	4922	56.24	36	1	1
NR4A1	9889	55	4922	27.37	17	1	1
NR4A3	9889	115	4922	57.24	30	1	1
NR6A1	9889	66	4922	32.85	10	1	1
NRL	9889	52	4922	25.88	9	1	1
ONECUT1	9889	45	4922	22.4	9	1	1
OVOL1	9889	154	4922	76.65	59	1	1
PA2G4	9889	189	4922	94.07	75	1	1
PAX1	9889	133	4922	66.2	28	1	1
PAX5	9889	63	4922	31.36	9	1	1
PGR	9889	56	4922	27.87	4	1	1
PHOX2A	9889	40	4922	19.91	9	1	1
PHOX2B	9889	119	4922	59.23	18	1	1
PITX3	9889	80	4922	39.82	26	1	1
PKNOX1	9889	48	4922	23.89	15	1	1
POU1F1	9889	26	4922	12.94	2	1	1
POU2AF1	9889	25	4922	12.44	5	1	1
POU2F2	9889	86	4922	42.8	20	1	1
POU3F1	9889	67	4922	33.35	15	1	1
POU4F1	9889	69	4922	34.34	19	1	1
POU4F2	9889	35	4922	17.42	10	1	1
POU4F3	9889	27	4922	13.44	5	1	1
POU6F2	9889	61	4922	30.36	14	1	1
PRDM13	9889	55	4922	27.37	15	1	1
PRDM14	9889	119	4922	59.23	12	1	1
PRDM9	9889	89	4922	44.3	9	1	1
PREB	9889	117	4922	58.23	38	1	1
PRMT3	9889	101	4922	50.27	19	1	1
RAX	9889	126	4922	62.71	36	1	1
REXO4	9889	40	4922	19.91	10	1	1
RORA	9889	89	4922	44.3	20	1	1
RXRG	9889	73	4922	36.33	10	1	1
SHOX2	9889	59	4922	29.37	17	1	1
SIM1	9889	114	4922	56.74	18	1	1
SIM2	9889	28	4922	13.94	7	1	1
SIX2	9889	74	4922	36.83	12	1	1
SIX3	9889	32	4922	15.93	6	1	1
SKI	9889	64	4922	31.85	17	1	1
SMAD1	9889	38	4922	18.91	10	1	1
SNAPC4	9889	40	4922	19.91	10	1	1
SNAPC5	9889	54	4922	26.88	14	1	1
SON	9889	26	4922	12.94	7	1	1
SOX10	9889	30	4922	14.93	3	1	1
SOX14	9889	128	4922	63.71	16	1	1
SP3	9889	37	4922	18.42	10	1	1
SPDEF	9889	95	4922	47.28	12	1	1
SPI1	9889	62	4922	30.86	11	1	1
SRCAP	9889	48	4922	23.89	8	1	1
SREBF2	9889	69	4922	34.34	18	1	1
SRY	9889	21	4922	10.45	3	1	1
STAT3	9889	159	4922	79.14	41	1	1
TBR1	9889	66	4922	32.85	15	1	1
TBX10	9889	114	4922	56.74	24	1	1
TBX21	9889	15	4922	7.47	2	1	1
TBX4	9889	57	4922	28.37	9	1	1
TBX5	9889	25	4922	12.44	6	1	1
TBX6	9889	61	4922	30.36	18	1	1
TCF20	9889	108	4922	53.75	33	1	1
TFAP2A	9889	89	4922	44.3	26	1	1
TFAP2B	9889	219	4922	109	52	1	1
TFDP1	9889	65	4922	32.35	17	1	1
TFDP3	9889	44	4922	21.9	5	1	1
TFEC	9889	142	4922	70.68	22	1	1
THAP11	9889	131	4922	65.2	50	1	1
THAP4	9889	79	4922	39.32	20	1	1
THAP7	9889	101	4922	50.27	33	1	1
TLX2	9889	19	4922	9.46	3	1	1
VSX1	9889	70	4922	34.84	15	1	1
YBX2	9889	63	4922	31.36	17	1	1
YY1	9889	74	4922	36.83	23	1	1
ZBED2	9889	27	4922	13.44	7	1	1
ZBTB16	9889	59	4922	29.37	17	1	1
ZBTB24	9889	101	4922	50.27	29	1	1
ZBTB3	9889	86	4922	42.8	30	1	1
ZBTB32	9889	67	4922	33.35	17	1	1
ZBTB43	9889	72	4922	35.84	17	1	1
ZBTB44	9889	79	4922	39.32	12	1	1
ZFP64	9889	74	4922	36.83	21	1	1
ZIC3	9889	100	4922	49.77	18	1	1
ZKSCAN3	9889	34	4922	16.92	6	1	1
ZNF133	9889	51	4922	25.38	16	1	1
ZNF134	9889	48	4922	23.89	10	1	1
ZNF142	9889	64	4922	31.85	15	1	1
ZNF200	9889	54	4922	26.88	16	1	1
ZNF205	9889	29	4922	14.43	6	1	1
ZNF208	9889	46	4922	22.9	9	1	1
ZNF230	9889	16	4922	7.96	2	1	1
ZNF274	9889	22	4922	10.95	4	1	1
ZNF292	9889	48	4922	23.89	13	1	1
ZNF350	9889	50	4922	24.89	14	1	1
ZNF37A	9889	60	4922	29.86	19	1	1
ZNF384	9889	17	4922	8.46	2	1	1
ZNF407	9889	71	4922	35.34	12	1	1
ZNF415	9889	49	4922	24.39	11	1	1
ZNF423	9889	37	4922	18.42	7	1	1
ZNF460	9889	33	4922	16.42	7	1	1
ZNF512B	9889	47	4922	23.39	11	1	1
ZNF528	9889	81	4922	40.32	23	1	1
ZNF556	9889	66	4922	32.85	7	1	1
ZNF586	9889	60	4922	29.86	18	1	1
ZNF646	9889	45	4922	22.4	10	1	1
ZNF654	9889	94	4922	46.79	20	1	1
ZNF671	9889	100	4922	49.77	30	1	1
ZNF672	9889	107	4922	53.26	33	1	1
ZNF710	9889	27	4922	13.44	3	1	1
ZNF750	9889	99	4922	49.27	12	1	1
ZNF771	9889	64	4922	31.85	14	1	1
ZNF780B	9889	30	4922	14.93	8	1	1
ZNF80	9889	42	4922	20.9	6	1	1
ZNF804A	9889	89	4922	44.3	30	1	1
ZNF81	9889	37	4922	18.42	5	1	1
ZSCAN2	9889	35	4922	17.42	8	1	1
ZSCAN5A	9889	38	4922	18.91	9	1	1
