# Supplementary material for: NF1 regulates mesenchymal glioblastoma plasticity and aggressiveness through the AP-1 transcription factor FOSL1
Source: eLife. 2021 Aug 17;10:e64846. doi: 10.7554/eLife.64846 (PMC8370767; doi:10.7554/eLife.64846)
Supplement: Supplementary file 4. [file elife-64846-supp4.xlsx]

## Sheet: Table_S4
# Supplementary File 4: TCGA and CGGA data
Sample	Histology	Grade	IDH_codel.subtype	survival_months	vital_status	NF1_status	dataset	Developmental_ssGSEA	Injury_ssGSEA	Classical_ssGSEA	Mesenchymal_ssGSEA	Proneural_ssGSEA	Developmental_pval_ssGSEA	Injury_pval_ssGSEA	Classical_pval_ssGSEA	Mesenchymal_pval_ssGSEA	Proneural_pval_ssGSEA	Wang_2017	Richards_2021	FOSL1	NF1
TCGA-02-0047	GBM	IV	IDHwt	14.7	1	NotAltered	TCGA	2610.65	2330.11	5976.23	3246.61	1874.19	0.013986	0.000999001	0.993007	0.032967	0.000999001	PN	INJ	6.07674	11.3156
TCGA-02-0055	GBM	IV	IDHwt	2.5	1	Altered	TCGA	617.554	3984.06	4424.6	7405.12	-956.958	1	0.000999001	1	0.000999001	1	MES	INJ	11.0184	9.00727
TCGA-02-2483	GBM	IV	IDHmut-non-codel	15.3	0	NotAltered	TCGA	NA	NA	NA	NA	NA	NA	NA	NA	NA	NA	NA	NA	6.14117	10.6096
TCGA-02-2485	GBM	IV	IDHwt	15.5	0	NotAltered	TCGA	2914.19	1822.12	7312.44	1760.06	621.673	0.000999001	1	0.001998	0.963037	0.280719	CL	DEV	6.86654	10.6803
TCGA-02-2486	GBM	IV	IDHwt	20.3	1	NotAltered	TCGA	1360.74	2991.77	5409.4	4963.44	-1624.95	1	0.000999001	1	0.000999001	1	MES	INJ	8.82899	10.0352
TCGA-06-0125	GBM	IV	IDHwt	47.6	1	NotAltered	TCGA	2864.15	1889.53	7852.87	3048.76	-196.98	0.000999001	1	0.000999001	0.0779221	0.917083	CL	DEV	6.80905	10.9274
TCGA-06-0129	GBM	IV	IDHmut-non-codel	33.7	1	NotAltered	TCGA	NA	NA	NA	NA	NA	NA	NA	NA	NA	NA	NA	NA	4.93449	11.6045
TCGA-06-0130	GBM	IV	IDHwt	13	1	Altered	TCGA	682.495	3707.73	4591.36	6339.88	-1191.44	1	0.000999001	1	0.000999001	1	MES	INJ	9.6975	10.0104
TCGA-06-0132	GBM	IV	IDHwt	25.3	1	NotAltered	TCGA	2326.95	2630.47	5699.35	4493.67	693.146	1	0.000999001	0.998002	0.000999001	0.231768	MES	INJ	6.41856	10.3829
TCGA-06-0138	GBM	IV	IDHwt	24.2	1	NA	TCGA	2451.84	2111.15	6105.83	4184.97	1130.56	0.984016	0.771229	0.98002	0.000999001	0.03996	MES	INJ	6.65402	10.3059
TCGA-06-0141	GBM	IV	IDHwt	10.3	1	NotAltered	TCGA	1822.06	2913.46	5999.64	5587.06	-246.097	1	0.000999001	0.993007	0.000999001	0.936064	MES	INJ	8.27635	9.40211
TCGA-06-0156	GBM	IV	NA	5.9	1	NA	TCGA	NA	NA	NA	NA	NA	NA	NA	NA	NA	NA	NA	NA	7.73478	10.7009
TCGA-06-0157	GBM	IV	IDHwt	3.2	1	NotAltered	TCGA	2826.45	1902.52	7434.48	2294.95	280.506	0.000999001	1	0.001998	0.663337	0.585415	CL	DEV	4.83473	10.5646
TCGA-06-0158	GBM	IV	IDHwt	10.8	1	NotAltered	TCGA	2663.76	2150.69	7406.85	2545.5	-154.789	0.001998	0.315684	0.001998	0.420579	0.901099	CL	DEV	6.77762	11.0224
TCGA-06-0168	GBM	IV	IDHwt	19.7	1	NotAltered	TCGA	2203.86	2559.84	6461.1	4944.03	-140.492	1	0.000999001	0.772228	0.000999001	0.891109	MES	INJ	5.30344	10.2643
TCGA-06-0174	GBM	IV	IDHwt	3.2	1	NotAltered	TCGA	3110.87	1584.81	6046.41	2650.38	3716.36	0.000999001	1	0.989011	0.305694	0.000999001	PN	DEV	6.31602	10.7542
TCGA-06-0178	GBM	IV	IDHmut-non-codel	88.1	1	NA	TCGA	NA	NA	NA	NA	NA	NA	NA	NA	NA	NA	NA	NA	5.28316	9.53751
TCGA-06-0184	GBM	IV	IDHwt	69.9	1	Altered	TCGA	1974.32	2562.94	6720.97	3631.8	-735.5	1	0.000999001	0.385614	0.002997	0.998002	MES	INJ	6.98347	8.97076
TCGA-06-0187	GBM	IV	IDHwt	27.2	1	Altered	TCGA	2270.26	2404.24	7212.6	3865.05	-1691.35	1	0.000999001	0.00799201	0.001998	1	MES	INJ	8.68867	10.4097
TCGA-06-0190	GBM	IV	IDHwt	10.4	1	Altered	TCGA	1715.74	3102.57	6390.91	6366.5	-555.257	1	0.000999001	0.856144	0.000999001	0.991009	MES	INJ	8.32815	10.0175
TCGA-06-0210	GBM	IV	IDHwt	7.4	1	Altered	TCGA	1995.41	2639.85	6235.52	5075.31	-835.216	1	0.000999001	0.948052	0.000999001	0.999001	MES	INJ	9.70389	9.8817
TCGA-06-0211	GBM	IV	IDHwt	11.8	1	NotAltered	TCGA	2809.1	1766.84	7584.54	1502.49	-574.832	0.000999001	1	0.000999001	0.993007	0.992008	CL	DEV	6.06182	10.7538
TCGA-06-0219	GBM	IV	IDHwt	0.7	1	NotAltered	TCGA	2210.78	2044.07	5578.84	2252.18	414.98	1	0.999001	1	0.7003	0.43956	PN	INJ	6.43662	9.80885
TCGA-06-0238	GBM	IV	IDHwt	13.3	1	NotAltered	TCGA	2637.22	1912.48	4414.58	2662.09	3869.31	0.001998	1	1	0.288711	0.000999001	PN	DEV	5.2029	9.85234
TCGA-06-0644	GBM	IV	IDHwt	12.6	1	Altered	TCGA	846.531	3621.2	5376.47	6479.48	-994.17	1	0.000999001	1	0.000999001	1	MES	INJ	10.5736	9.85902
TCGA-06-0645	GBM	IV	IDHwt	5.8	1	NotAltered	TCGA	2098.63	2751.83	6062.21	5745.15	-220.058	1	0.000999001	0.986014	0.000999001	0.925075	MES	INJ	7.67133	10.1469
TCGA-06-0646	GBM	IV	IDHwt	5.8	1	NotAltered	TCGA	2648.4	2188.25	5872.98	4053.54	1540.02	0.001998	0.04995	0.997003	0.000999001	0.002997	MES	DEV	7.04388	10.7888
TCGA-06-0649	GBM	IV	IDHwt	2.1	1	NotAltered	TCGA	2170.79	2461.16	5768.23	4229.56	375.42	1	0.000999001	0.998002	0.000999001	0.485514	MES	INJ	6.35965	10.7166
TCGA-06-0686	GBM	IV	IDHwt	14.2	1	NotAltered	TCGA	2867.21	1750.09	4906.05	2714.98	3949.79	0.000999001	1	1	0.23976	0.000999001	PN	DEV	7.25317	10.0877
TCGA-06-0743	GBM	IV	IDHwt	26.4	1	NotAltered	TCGA	2662.56	1854.27	7159.9	2720.49	-663.255	0.001998	1	0.012987	0.235764	0.996004	CL	DEV	6.3313	10.3877
TCGA-06-0744	GBM	IV	IDHwt	46.9	1	Altered	TCGA	2824.23	1584.93	6931.38	1650.47	53.7197	0.000999001	1	0.111888	0.98002	0.779221	CL	DEV	6.38671	10.1577
TCGA-06-0745	GBM	IV	IDHwt	7.9	1	NotAltered	TCGA	2637.92	1833.13	5891.38	3429.55	657.051	0.001998	1	0.995005	0.011988	0.262737	MES	DEV	7.44316	10.2515
TCGA-06-0747	GBM	IV	IDHwt	2.7	1	NotAltered	TCGA	2515.52	1996.23	7760.19	2272.26	-937.078	0.67033	1	0.000999001	0.683317	1	CL	DEV	8.63664	10.9709
TCGA-06-0749	GBM	IV	IDHwt	2.7	1	NotAltered	TCGA	2619.8	1971.38	6044.7	1084.96	715.709	0.00899101	1	0.989011	1	0.215784	PN	DEV	5.64351	10.116
TCGA-06-0750	GBM	IV	IDHwt	0.9	1	NotAltered	TCGA	2060.49	2541.52	5850.94	4615.68	-840.522	1	0.000999001	0.997003	0.000999001	0.999001	MES	INJ	8.24731	10.0493
TCGA-06-0878	GBM	IV	IDHwt	7.2	0	NotAltered	TCGA	2124.3	2594.91	6898.08	4760.48	-1583.59	1	0.000999001	0.143856	0.000999001	1	MES	INJ	8.05246	10.9859
TCGA-06-0882	GBM	IV	IDHwt	20.8	1	Altered	TCGA	2270.92	2559.74	7154.35	3058.03	-753.289	1	0.000999001	0.017982	0.0739261	0.998002	CL	INJ	8.76517	9.61
TCGA-06-1804	GBM	IV	IDHwt	13.6	1	NotAltered	TCGA	2702.07	1915.62	7318.42	645.256	-790.095	0.000999001	1	0.001998	1	0.998002	CL	DEV	4.40805	11.1419
TCGA-06-2557	GBM	IV	IDHwt	1.1	1	NotAltered	TCGA	2656.4	1987.09	7070.12	2327.3	357.525	0.001998	1	0.033966	0.633367	0.498501	CL	DEV	4.94574	10.6501
TCGA-06-2558	GBM	IV	IDHwt	12.5	1	NotAltered	TCGA	2832.93	1912.32	5456.86	2736.18	2813.02	0.000999001	1	1	0.22977	0.000999001	PN	DEV	6.06967	10.8616
TCGA-06-2559	GBM	IV	IDHwt	4.9	1	NotAltered	TCGA	2817.26	1915.99	6093.55	2947.14	1413.64	0.000999001	1	0.982018	0.114885	0.00599401	PN	DEV	7.41354	11.404
TCGA-06-2561	GBM	IV	IDHwt	17.7	1	NotAltered	TCGA	2371.81	2430.04	6909.49	2446.93	-917.244	1	0.000999001	0.133866	0.518482	1	CL	INJ	7.54673	11.1858
TCGA-06-2562	GBM	IV	IDHwt	12.6	1	Altered	TCGA	2081.73	2703.92	6707.73	4670.32	-1251.47	1	0.000999001	0.405594	0.000999001	1	MES	INJ	8.951	9.70916
TCGA-06-2563	GBM	IV	IDHwt	30.6	0	NotAltered	TCGA	2616.19	1961.52	7748.66	1629.98	-1491.32	0.00999001	1	0.000999001	0.984016	1	CL	DEV	6.57542	10.8557
TCGA-06-2564	GBM	IV	IDHwt	6	0	NotAltered	TCGA	2556.31	2208.31	7272.24	2317.66	-604.754	0.220779	0.00799201	0.001998	0.646354	0.992008	CL	INJ	6.94158	11.2466
TCGA-06-2565	GBM	IV	IDHwt	16.6	1	NotAltered	TCGA	2821.89	1841.05	7601.03	2053.78	-841.914	0.000999001	1	0.000999001	0.846154	0.999001	CL	DEV	6.32205	11.4299
TCGA-06-2567	GBM	IV	IDHwt	4.4	1	NotAltered	TCGA	2220.94	2306.14	6746.07	2736.68	-650.496	1	0.000999001	0.343656	0.22977	0.995005	MES	INJ	6.70333	10.945
TCGA-06-2569	GBM	IV	IDHwt	0.4	0	Altered	TCGA	1367.01	2621.09	4686.68	3689.02	464.094	1	0.000999001	1	0.002997	0.396603	MES	INJ	4.61887	9.57148
TCGA-06-2570	GBM	IV	IDHmut-non-codel	31.5	0	NotAltered	TCGA	NA	NA	NA	NA	NA	NA	NA	NA	NA	NA	NA	NA	6.98076	11.1275
TCGA-06-5408	GBM	IV	IDHwt	11.7	1	Altered	TCGA	2602.41	2099.63	7034.93	3070.03	636.872	0.023976	0.867133	0.045954	0.0699301	0.274725	CL	DEV	8.12992	10.8413
TCGA-06-5410	GBM	IV	IDHwt	3.6	1	Altered	TCGA	1331.79	3293.45	5380.06	6710.49	-547.06	1	0.000999001	1	0.000999001	0.989011	MES	INJ	8.47536	9.83819
TCGA-06-5411	GBM	IV	IDHwt	8.4	1	NotAltered	TCGA	2876.93	1881.65	5194.96	2518.42	2736.26	0.000999001	1	1	0.452547	0.000999001	PN	DEV	6.63644	10.114
TCGA-06-5412	GBM	IV	IDHwt	4.5	1	NotAltered	TCGA	1587.84	3062.44	6287.81	5688.83	-1488.43	1	0.000999001	0.926074	0.000999001	1	MES	INJ	8.67999	9.15931
TCGA-06-5413	GBM	IV	IDHwt	8.8	0	NotAltered	TCGA	2430.44	2221.48	5831.67	4284.37	1066.2	0.997003	0.003996	0.998002	0.000999001	0.0529471	MES	INJ	6.35532	10.3117
TCGA-06-5414	GBM	IV	IDHwt	9	0	NotAltered	TCGA	2213.9	2346.35	7514.38	3525	-1432.1	1	0.000999001	0.000999001	0.00599401	1	CL	INJ	7.84304	10.9034
TCGA-06-5415	GBM	IV	IDHwt	8.5	0	NotAltered	TCGA	2919.86	1778.25	7741.58	1349.92	418.15	0.000999001	1	0.000999001	0.998002	0.435564	CL	DEV	7.18465	10.9417
TCGA-06-5416	GBM	IV	NA	6.7	0	NA	TCGA	NA	NA	NA	NA	NA	NA	NA	NA	NA	NA	NA	NA	6.63709	10.3808
TCGA-06-5417	GBM	IV	NA	5.1	0	NA	TCGA	NA	NA	NA	NA	NA	NA	NA	NA	NA	NA	NA	NA	5.98816	11.4795
TCGA-06-5418	GBM	IV	IDHwt	2.7	1	NotAltered	TCGA	2311.84	2272.76	6478.56	4038.83	-1245.74	1	0.000999001	0.754246	0.000999001	1	MES	INJ	7.90216	10.6448
TCGA-06-5856	GBM	IV	IDHwt	3.7	1	NotAltered	TCGA	2609.06	2006.98	6854.26	2592.06	1361.99	0.014985	1	0.190809	0.370629	0.00899101	PN	DEV	5.70054	10.3391
TCGA-06-5858	GBM	IV	IDHwt	6.1	0	NotAltered	TCGA	2137.05	2432.36	6592.59	3372.14	-359.267	1	0.000999001	0.589411	0.015984	0.968032	MES	INJ	7.32216	10.9919
TCGA-06-5859	GBM	IV	IDHwt	4.6	0	NotAltered	TCGA	2367.93	2096.34	6518.5	1299.32	-11.0954	1	0.89011	0.708292	0.998002	0.812188	CL	INJ	4.5379	11.1906
TCGA-08-0386	GBM	IV	IDHwt	18	1	Altered	TCGA	2537.18	2040.9	7113.32	2154.61	-303.842	0.417582	1	0.024975	0.776224	0.953047	CL	DEV	7.6083	10.8036
TCGA-12-0616	GBM	IV	IDHwt	14.7	1	NotAltered	TCGA	2550.7	1854.3	4851.11	2540.16	2942.16	0.273726	1	1	0.430569	0.000999001	PN	DEV	6.04087	9.96716
TCGA-12-0618	GBM	IV	IDHwt	13	1	NotAltered	TCGA	3297.76	1406.62	5321.21	1169.1	3636.14	0.000999001	1	1	0.999001	0.000999001	PN	DEV	6.4673	10.8067
TCGA-12-0619	GBM	IV	IDHwt	34.9	1	Altered	TCGA	1899.05	2790.12	5808.92	5145.09	-371.92	1	0.000999001	0.998002	0.000999001	0.971029	MES	INJ	8.12471	10.0093
TCGA-12-0821	GBM	IV	IDHwt	10.6	1	NotAltered	TCGA	2453.67	2017.19	6228.49	2514.3	337.048	0.982018	1	0.95005	0.456543	0.52048	MES	DEV	6.06033	10.761
TCGA-12-1597	GBM	IV	NA	22.2	1	NA	TCGA	NA	NA	NA	NA	NA	NA	NA	NA	NA	NA	NA	NA	4.74788	10.0618
TCGA-12-3650	GBM	IV	IDHwt	10.9	1	NotAltered	TCGA	3104.48	1407.23	6389.16	1414.7	1397.96	0.000999001	1	0.857143	0.998002	0.00699301	PN	DEV	5.0828	9.86949
TCGA-12-3652	GBM	IV	IDHwt	34.9	1	NotAltered	TCGA	2612.23	1700.14	6624.13	2143.17	-679.8	0.012987	1	0.537463	0.784216	0.996004	CL	DEV	7.95378	9.74454
TCGA-12-3653	GBM	IV	IDHwt	14.5	1	Altered	TCGA	2572.79	1876.76	8013.89	912.61	-1532.43	0.111888	1	0.000999001	1	1	CL	DEV	5.48333	10.5256
TCGA-12-5295	GBM	IV	IDHwt	14.9	1	NotAltered	TCGA	2062.8	2116.37	6298.31	2219.45	-705.165	1	0.726274	0.925075	0.732268	0.997003	MES	INJ	6.04831	9.51568
TCGA-12-5299	GBM	IV	IDHwt	3.2	1	NotAltered	TCGA	2288.35	2348.08	6737.6	4131.15	-474.339	1	0.000999001	0.35964	0.000999001	0.985015	MES	INJ	9.6117	10.4406
TCGA-14-0781	GBM	IV	IDHwt	1	1	NotAltered	TCGA	1672.11	3034.77	6462.44	5561.02	-1378.3	1	0.000999001	0.77023	0.000999001	1	MES	INJ	9.29386	9.394
TCGA-14-0787	GBM	IV	IDHwt	2.2	1	NotAltered	TCGA	2423.55	2083.25	7162.91	2947.09	-1027.66	0.998002	0.95005	0.012987	0.114885	1	CL	INJ	8.71157	10.4396
TCGA-14-0789	GBM	IV	IDHwt	11.2	1	Altered	TCGA	1892.79	2933.3	6541.59	5767.96	-1129.26	1	0.000999001	0.67033	0.000999001	1	MES	INJ	8.87997	9.46377
TCGA-14-0790	GBM	IV	IDHwt	13.8	1	NotAltered	TCGA	2857.63	1696.41	7955.09	215.423	-474.068	0.000999001	1	0.000999001	1	0.985015	CL	DEV	5.32518	10.5853
TCGA-14-0817	GBM	IV	IDHwt	5.4	1	NotAltered	TCGA	2078.53	2323.28	5617.2	3612.52	601.818	1	0.000999001	1	0.002997	0.28971	MES	INJ	5.73413	9.65291
TCGA-14-1034	GBM	IV	IDHwt	15.9	1	Altered	TCGA	1995.65	2665.32	7487.64	4481.43	-1546.71	1	0.000999001	0.000999001	0.000999001	1	NA	INJ	7.15934	8.82014
TCGA-14-1823	GBM	IV	IDHwt	17.9	1	NotAltered	TCGA	1628.55	2731.29	5693.86	4879.97	-1640.6	1	0.000999001	0.998002	0.000999001	1	MES	INJ	6.38838	10.2432
TCGA-14-1825	GBM	IV	IDHwt	7.6	1	NotAltered	TCGA	2842.4	1545.33	4946.24	1549.31	3771.63	0.000999001	1	1	0.991009	0.000999001	PN	DEV	5.51256	10.3515
TCGA-14-1829	GBM	IV	IDHwt	7.2	0	NotAltered	TCGA	1940.75	2399.83	4941.19	4293.66	571.22	1	0.000999001	1	0.000999001	0.314685	MES	INJ	5.94907	9.72455
TCGA-14-2554	GBM	IV	IDHwt	17.5	1	NotAltered	TCGA	2056.75	2457.48	6765.22	3571.96	-1375.36	1	0.000999001	0.311688	0.002997	1	MES	INJ	7.38237	10.6489
TCGA-15-0742	GBM	IV	IDHwt	13.8	1	NotAltered	TCGA	2914.03	1572.38	7312.84	2015.1	-361.884	0.000999001	1	0.001998	0.867133	0.969031	CL	DEV	7.5816	10.4188
TCGA-15-1444	GBM	IV	IDHmut-non-codel	50.5	1	NotAltered	TCGA	NA	NA	NA	NA	NA	NA	NA	NA	NA	NA	NA	NA	5.17399	11.5298
TCGA-16-0846	GBM	IV	IDHwt	3.9	1	NotAltered	TCGA	2678.05	2182.45	6038.01	1305.71	2755.46	0.001998	0.0749251	0.991009	0.998002	0.000999001	PN	DEV	6.22879	10.6815
TCGA-16-1045	GBM	IV	IDHwt	29	1	NotAltered	TCGA	2201.68	2697.06	6851.71	4731.34	-1098.85	1	0.000999001	0.195804	0.000999001	1	MES	INJ	5.5616	10.9724
TCGA-19-1390	GBM	IV	IDHwt	25.4	1	NotAltered	TCGA	3211.93	1271.71	5086.08	1242.17	3720.83	0.000999001	1	1	0.999001	0.000999001	PN	DEV	5.24594	11.3624
TCGA-19-1787	GBM	IV	NA	12.7	1	NA	TCGA	NA	NA	NA	NA	NA	NA	NA	NA	NA	NA	NA	NA	6.87295	10.4843
TCGA-19-2619	GBM	IV	IDHwt	9.7	0	NotAltered	TCGA	2923.21	1917.43	7696.76	2712.18	-533.739	0.000999001	1	0.000999001	0.244755	0.989011	CL	DEV	7.98295	11.1352
TCGA-19-2620	GBM	IV	IDHwt	4.9	1	NotAltered	TCGA	2586.29	2214.24	7612.43	3080.92	-217.631	0.0529471	0.00699301	0.000999001	0.0679321	0.923077	CL	INJ	8.23736	10.9648
TCGA-19-2624	GBM	IV	IDHwt	0.2	1	NotAltered	TCGA	3354.98	1300.4	6189.66	1102.48	2626.47	0.000999001	1	0.965035	1	0.000999001	PN	DEV	7.65412	10.9522
TCGA-19-2625	GBM	IV	IDHwt	4.1	1	NotAltered	TCGA	2118.31	2247.13	6506.43	3751.11	-1335.64	1	0.001998	0.718282	0.002997	1	MES	INJ	8.34751	10.6257
TCGA-19-2629	GBM	IV	IDHmut-non-codel	24.2	1	NotAltered	TCGA	NA	NA	NA	NA	NA	NA	NA	NA	NA	NA	NA	NA	5.23054	10.9574
TCGA-19-4065	GBM	IV	NA	7	0	Altered	TCGA	NA	NA	NA	NA	NA	NA	NA	NA	NA	NA	NA	NA	7.86314	10.0132
TCGA-19-5960	GBM	IV	IDHwt	15	1	NotAltered	TCGA	3218.86	1335.26	6890.39	-228.158	698.138	0.000999001	1	0.150849	1	0.224775	CL	DEV	4.52148	11.6148
TCGA-26-1442	GBM	IV	IDHmut-non-codel	31.3	0	NotAltered	TCGA	NA	NA	NA	NA	NA	NA	NA	NA	NA	NA	NA	NA	4.55906	11.4591
TCGA-26-5132	GBM	IV	IDHwt	9.4	0	NotAltered	TCGA	2276.76	2136.88	6565.12	3113.8	-733.489	1	0.494505	0.634366	0.0589411	0.998002	MES	INJ	7.83913	10.5313
TCGA-26-5133	GBM	IV	IDHwt	14.9	0	Altered	TCGA	2618.8	1702.66	5510.08	1786.28	1816.95	0.00899101	1	1	0.959041	0.001998	PN	DEV	5.54381	8.73091
TCGA-26-5134	GBM	IV	IDHwt	5.5	0	NotAltered	TCGA	2958.64	1602.09	5542.36	2183.03	3902.12	0.000999001	1	1	0.758242	0.000999001	PN	DEV	5.80291	11.0879
TCGA-26-5135	GBM	IV	IDHwt	8.9	1	NotAltered	TCGA	2847.82	1974.29	5801.68	3398.83	2146.04	0.000999001	1	0.998002	0.013986	0.000999001	PN	DEV	8.31675	10.513
TCGA-26-5136	GBM	IV	IDHwt	19	1	NotAltered	TCGA	2076.16	2306.62	6099.27	2678.28	-236.436	1	0.000999001	0.98002	0.270729	0.934066	MES	INJ	8.10334	10.5764
TCGA-26-5139	GBM	IV	IDHwt	1.6	0	NotAltered	TCGA	2386.08	2343	7202.98	3931.53	-1302.48	1	0.000999001	0.00899101	0.000999001	1	MES	INJ	9.28245	10.9338
TCGA-27-1830	GBM	IV	IDHwt	5.1	1	NotAltered	TCGA	2310.78	2493.06	5528.03	4432.77	1394.61	1	0.000999001	1	0.000999001	0.00699301	MES	INJ	6.82018	11.0575
TCGA-27-1831	GBM	IV	IDHwt	16.6	1	NotAltered	TCGA	1766	2532.87	6126.43	3892.05	-1346.55	1	0.000999001	0.975025	0.001998	1	MES	INJ	7.51476	10.1716
TCGA-27-1832	GBM	IV	IDHwt	9.9	1	NotAltered	TCGA	1570.23	2977.51	5792.21	5510.65	-1330.67	1	0.000999001	0.998002	0.000999001	1	MES	INJ	8.53109	10.4555
TCGA-27-1834	GBM	IV	IDHwt	40.5	1	NotAltered	TCGA	2353.36	2340.39	6059.78	1971.17	521.667	1	0.000999001	0.986014	0.888112	0.344655	PN	INJ	6.4325	10.9911
TCGA-27-1835	GBM	IV	IDHwt	21.3	1	NotAltered	TCGA	2644.77	1731.05	8076.28	372.381	-1483.43	0.001998	1	0.000999001	1	1	CL	DEV	6.1187	11.4441
TCGA-27-1837	GBM	IV	IDHwt	14	1	NotAltered	TCGA	2808.48	1956.63	6841.22	1874.61	1166.29	0.000999001	1	0.205794	0.929071	0.032967	PN	DEV	6.99333	10.672
TCGA-27-2519	GBM	IV	IDHwt	18.1	1	NotAltered	TCGA	2219.76	2367.53	5800.99	3402.11	188.138	1	0.000999001	0.998002	0.013986	0.671329	MES	INJ	8.40987	10.7773
TCGA-27-2521	GBM	IV	IDHmut-non-codel	16.8	1	NotAltered	TCGA	NA	NA	NA	NA	NA	NA	NA	NA	NA	NA	NA	NA	6.42579	10.7002
TCGA-27-2523	GBM	IV	IDHwt	16.1	1	NotAltered	TCGA	2928.98	1537.34	6810.75	1704.46	258.473	0.000999001	1	0.23976	0.971029	0.604396	CL	DEV	7.42943	10.8836
TCGA-27-2524	GBM	IV	IDHwt	7.6	1	NotAltered	TCGA	1873.01	2611.9	5474.69	5803.86	-98.5084	1	0.000999001	1	0.000999001	0.865135	MES	INJ	10.226	7.83717
TCGA-27-2526	GBM	IV	IDHwt	2.9	1	NotAltered	TCGA	2139.19	2156.92	6999.67	1876.69	-1285.27	1	0.248751	0.0639361	0.928072	1	CL	INJ	8.00066	9.64374
TCGA-27-2528	GBM	IV	IDHwt	15.8	1	NotAltered	TCGA	2433.27	2211.08	7453.42	3000.71	-929.802	0.996004	0.00799201	0.000999001	0.0969031	1	CL	INJ	7.70388	10.8777
TCGA-28-1747	GBM	IV	IDHwt	2.5	1	NotAltered	TCGA	2645.42	2016.24	7279.94	678.947	733.312	0.001998	1	0.001998	1	0.204795	CL	DEV	6.04373	10.8039
TCGA-28-1753	GBM	IV	IDHwt	1.2	0	NotAltered	TCGA	2581.63	2327.8	6666.1	4598.81	1373.86	0.0719281	0.000999001	0.47952	0.000999001	0.00799201	MES	INJ	6.61522	10.5476
TCGA-28-2499	GBM	IV	NA	NA	NA	NA	TCGA	NA	NA	NA	NA	NA	NA	NA	NA	NA	NA	NA	NA	6.39864	10.4311
TCGA-28-2509	GBM	IV	IDHwt	4.8	0	Altered	TCGA	1792.49	2556.94	6519.81	4640.88	-1528.49	1	0.000999001	0.707293	0.000999001	1	MES	INJ	8.5916	9.12571
TCGA-28-2510	NA	NA	IDHwt	NA	NA	NotAltered	TCGA	3056.58	1969.29	6278.92	2165.37	1839.66	0.000999001	1	0.927073	0.766234	0.000999001	PN	DEV	6.34161	10.7531
TCGA-28-2513	GBM	IV	IDHwt	7.3	0	NotAltered	TCGA	1753.66	2919.33	6278.25	6157.32	-1540.99	1	0.000999001	0.927073	0.000999001	1	MES	INJ	7.61643	10.3452
TCGA-28-2514	GBM	IV	IDHwt	5.3	0	NotAltered	TCGA	3046.79	1881.35	7116.32	1793.73	1005.28	0.000999001	1	0.023976	0.956044	0.0799201	CL	DEV	7.48593	11.2625
TCGA-28-5204	GBM	IV	IDHwt	14.9	1	NotAltered	TCGA	2519.74	2047.81	7166.61	1998.39	-370.761	0.626374	0.999001	0.010989	0.873127	0.971029	CL	DEV	6.83276	10.5883
TCGA-28-5207	GBM	IV	IDHwt	11.3	1	NotAltered	TCGA	2665.12	2121.67	6935.32	1331.07	960.871	0.001998	0.679321	0.105894	0.998002	0.0909091	PN	DEV	3.80743	10.7839
TCGA-28-5208	GBM	IV	IDHwt	17.9	1	Altered	TCGA	2359.82	2212.35	6805.55	2692.37	-199.903	1	0.00799201	0.246753	0.257742	0.917083	CL	INJ	7.21885	9.13023
TCGA-28-5209	GBM	IV	IDHwt	14.5	0	NotAltered	TCGA	2551.78	2109.12	7563.25	3112.79	-654.793	0.268731	0.794206	0.000999001	0.0589411	0.995005	CL	DEV	6.46289	10.9291
TCGA-28-5213	GBM	IV	IDHwt	31.3	0	NotAltered	TCGA	1454.14	2914.24	5463.29	5806.69	-1381.49	1	0.000999001	1	0.000999001	1	MES	INJ	7.40461	9.36312
TCGA-28-5215	GBM	IV	IDHwt	11	1	NotAltered	TCGA	2479.47	2365.9	5497.4	4081.21	3081.42	0.916084	0.000999001	1	0.000999001	0.000999001	NA	INJ	6.16181	11.1028
TCGA-28-5216	GBM	IV	IDHwt	13.6	0	NotAltered	TCGA	2394.56	2300.21	5067.11	4171.36	2821.11	1	0.000999001	1	0.000999001	0.000999001	NA	INJ	7.03238	10.3478
TCGA-28-5218	GBM	IV	IDHwt	5.2	1	NotAltered	TCGA	876.492	3415.23	4542.5	6311.63	-448.068	1	0.000999001	1	0.000999001	0.983017	MES	INJ	5.66579	10.8392
TCGA-28-5220	GBM	IV	IDHwt	12.8	1	NotAltered	TCGA	2247.4	2037.54	6095.93	712.5	-416.49	1	1	0.98002	1	0.98002	CL	DEV	3.50632	10.4028
TCGA-32-1970	GBM	IV	IDHwt	15.4	1	NotAltered	TCGA	2897.15	1784.69	7571.72	319.855	375.278	0.000999001	1	0.000999001	1	0.485514	CL	DEV	6.50934	11.0079
TCGA-32-1980	GBM	IV	IDHwt	1.2	1	NotAltered	TCGA	2468.35	2509.6	5980.57	3384.31	799.485	0.956044	0.000999001	0.993007	0.013986	0.170829	MES	INJ	7.75778	10.1862
TCGA-32-1982	GBM	IV	IDHwt	4.7	1	NotAltered	TCGA	2223.82	2430.27	6852.66	3320.93	-798.406	1	0.000999001	0.195804	0.018981	0.999001	MES	INJ	6.05325	10.1456
TCGA-32-2615	GBM	IV	IDHwt	15.9	1	NotAltered	TCGA	2304.74	2425.29	6832.83	4750.74	-1357	1	0.000999001	0.215784	0.000999001	1	MES	INJ	9.7491	10.7297
TCGA-32-2616	GBM	IV	NA	7.4	1	NA	TCGA	NA	NA	NA	NA	NA	NA	NA	NA	NA	NA	NA	NA	8.50638	10.81
TCGA-32-2632	GBM	IV	IDHwt	8.8	1	NotAltered	TCGA	2030.37	2515.93	6889.58	3008.97	-1238.19	1	0.000999001	0.150849	0.0939061	1	MES	INJ	6.87847	10.1819
TCGA-32-2634	GBM	IV	IDHwt	22.8	0	NotAltered	TCGA	2826.05	1834.49	5870.15	2588.61	2820.45	0.000999001	1	0.997003	0.373626	0.000999001	PN	DEV	5.74676	10.9907
TCGA-32-2638	GBM	IV	IDHwt	25.2	1	NotAltered	TCGA	2403.96	2395.7	7643.48	3969.84	-1574.59	1	0.000999001	0.000999001	0.000999001	1	NA	INJ	7.81094	10.8851
TCGA-32-4213	GBM	IV	IDHwt	19.9	0	NotAltered	TCGA	1998.71	2614.11	5869.45	4998.04	785.316	1	0.000999001	0.997003	0.000999001	0.178821	MES	INJ	7.32139	10.2643
TCGA-32-5222	GBM	IV	IDHwt	19.2	1	NotAltered	TCGA	2336.77	2096.24	6730.7	2618.45	-317.463	1	0.89011	0.36963	0.343656	0.957043	MES	INJ	7.13721	10.0414
TCGA-41-2571	GBM	IV	IDHwt	0.9	1	NotAltered	TCGA	3125.86	1420.59	4514.31	2369.87	3504.81	0.000999001	1	1	0.591409	0.000999001	PN	DEV	7.20655	9.85136
TCGA-41-2572	GBM	IV	IDHwt	13.3	1	NotAltered	TCGA	2453.79	2066.79	7398.98	2748.05	-1353.09	0.982018	0.984016	0.001998	0.222777	1	CL	DEV	6.53352	9.94268
TCGA-41-3915	GBM	IV	IDHwt	11.8	1	NotAltered	TCGA	2159.95	2539.36	5576.29	5287.56	1187	1	0.000999001	1	0.000999001	0.027972	MES	INJ	7.50509	11.0207
TCGA-41-4097	GBM	IV	IDHwt	0.2	1	Altered	TCGA	2151.65	2840.83	6954.78	4823.66	-752	1	0.000999001	0.0959041	0.000999001	0.998002	MES	INJ	8.71264	9.44892
TCGA-41-5651	GBM	IV	IDHwt	15.1	1	Altered	TCGA	3250.92	1381.59	5156.29	1211.95	4420.08	0.000999001	1	1	0.999001	0.000999001	PN	DEV	5.11398	10.5138
TCGA-76-4925	GBM	IV	IDHwt	4.8	1	NotAltered	TCGA	2431.04	1920.34	7275.24	2661.08	-701.687	0.997003	1	0.001998	0.291708	0.997003	CL	DEV	7.76981	11.1227
TCGA-76-4926	GBM	IV	IDHwt	4.5	1	NotAltered	TCGA	2493.87	2096.13	6956.32	1304.7	-768.953	0.845155	0.89011	0.0949051	0.998002	0.998002	CL	DEV	7.65489	11.1786
TCGA-76-4927	GBM	IV	NA	17.6	1	NA	TCGA	NA	NA	NA	NA	NA	NA	NA	NA	NA	NA	NA	NA	7.59448	10.6515
TCGA-76-4928	GBM	IV	IDHwt	3.1	1	NotAltered	TCGA	1745.25	2913.94	6208.47	5023.91	-229.66	1	0.000999001	0.96004	0.000999001	0.927073	MES	INJ	9.06135	10.2804
TCGA-76-4929	GBM	IV	IDHwt	3.6	1	NotAltered	TCGA	2570.02	1986.3	5640.17	2371.39	1360.24	0.126873	1	0.999001	0.59041	0.00899101	PN	DEV	6.86587	11.023
TCGA-76-4931	GBM	IV	IDHwt	9.2	1	NotAltered	TCGA	2929.09	1712.36	7119.92	1911.13	328.039	0.000999001	1	0.023976	0.913087	0.532468	CL	DEV	7.79231	10.7283
TCGA-76-4932	GBM	IV	NA	47.9	1	NA	TCGA	NA	NA	NA	NA	NA	NA	NA	NA	NA	NA	NA	NA	7.69326	10.3343
TCGA-CS-4938	Astrocytoma	II	IDHmut-non-codel	117.5	0	NotAltered	TCGA	NA	NA	NA	NA	NA	NA	NA	NA	NA	NA	NA	NA	3.56412	11.8921
TCGA-CS-4941	Astrocytoma	III	IDHwt	7.7	1	NotAltered	TCGA	2747.76	2011.39	7831.33	655.39	-334.899	0.000999001	1	0.000999001	1	0.962038	CL	DEV	4.81277	11.2289
TCGA-CS-4942	Astrocytoma	III	IDHmut-non-codel	43.9	1	NotAltered	TCGA	NA	NA	NA	NA	NA	NA	NA	NA	NA	NA	NA	NA	2.6741	11.9678
TCGA-CS-4943	Astrocytoma	III	IDHmut-non-codel	36.4	1	NotAltered	TCGA	NA	NA	NA	NA	NA	NA	NA	NA	NA	NA	NA	NA	3.79379	11.9103
TCGA-CS-4944	Astrocytoma	II	IDHmut-non-codel	60.1	0	NotAltered	TCGA	NA	NA	NA	NA	NA	NA	NA	NA	NA	NA	NA	NA	5.16207	11.5071
TCGA-CS-5390	Oligodendroglioma	II	IDHmut-codel	NA	1	NotAltered	TCGA	NA	NA	NA	NA	NA	NA	NA	NA	NA	NA	NA	NA	1.92075	12.2885
TCGA-CS-5393	Astrocytoma	III	IDHmut-non-codel	40.2	0	NotAltered	TCGA	NA	NA	NA	NA	NA	NA	NA	NA	NA	NA	NA	NA	2.95652	11.9516
TCGA-CS-5394	Astrocytoma	III	IDHmut-non-codel	0.3	0	NotAltered	TCGA	NA	NA	NA	NA	NA	NA	NA	NA	NA	NA	NA	NA	2.37401	12.5173
TCGA-CS-5395	Oligodendroglioma	II	IDHwt	21	1	NotAltered	TCGA	3030.43	1685.7	7725.86	-835.12	495.614	0.000999001	1	0.000999001	1	0.363636	CL	DEV	2.76435	11.9567
TCGA-CS-5396	Oligodendroglioma	III	IDHmut-codel	53.6	0	NotAltered	TCGA	NA	NA	NA	NA	NA	NA	NA	NA	NA	NA	NA	NA	5.18556	12.4977
TCGA-CS-5397	Astrocytoma	III	IDHwt	6.4	1	Altered	TCGA	2827.28	2135.67	7601.82	1097.26	693.814	0.000999001	0.512488	0.000999001	1	0.231768	CL	DEV	6.82959	10.773
TCGA-CS-6186	Oligoastrocytoma	III	IDHwt	17.7	1	NotAltered	TCGA	2943.76	1551.65	8374.02	-772.677	-1048.61	0.000999001	1	0.000999001	1	1	CL	DEV	5.23464	12.1186
TCGA-CS-6188	Astrocytoma	III	IDHwt	26.8	1	NotAltered	TCGA	2492.09	2276.3	7733.89	2127.55	-715.319	0.86014	0.000999001	0.000999001	0.791209	0.997003	CL	INJ	6.8291	11.7021
TCGA-CS-6290	Astrocytoma	III	IDHmut-non-codel	37.4	1	NotAltered	TCGA	NA	NA	NA	NA	NA	NA	NA	NA	NA	NA	NA	NA	4.69673	11.5093
TCGA-CS-6665	Astrocytoma	III	IDHmut-non-codel	51.6	0	NotAltered	TCGA	NA	NA	NA	NA	NA	NA	NA	NA	NA	NA	NA	NA	5.20026	11.6165
TCGA-CS-6666	Astrocytoma	III	IDHmut-non-codel	46.9	0	NotAltered	TCGA	NA	NA	NA	NA	NA	NA	NA	NA	NA	NA	NA	NA	4.15959	11.8201
TCGA-CS-6667	Astrocytoma	II	IDHmut-non-codel	48.3	0	NotAltered	TCGA	NA	NA	NA	NA	NA	NA	NA	NA	NA	NA	NA	NA	3.56566	11.8457
TCGA-CS-6668	Oligodendroglioma	II	IDHmut-codel	49.9	0	NotAltered	TCGA	NA	NA	NA	NA	NA	NA	NA	NA	NA	NA	NA	NA	2.93699	12.8202
TCGA-CS-6669	Oligodendroglioma	II	IDHwt	49.1	0	NA	TCGA	3312.35	1533.25	5969.38	-1550.57	2487.98	0.000999001	1	0.994006	1	0.000999001	PN	DEV	0.899562	11.7227
TCGA-CS-6670	Oligodendroglioma	III	IDHmut-codel	46.9	0	NotAltered	TCGA	NA	NA	NA	NA	NA	NA	NA	NA	NA	NA	NA	NA	5.29305	11.9261
TCGA-DB-5270	Oligoastrocytoma	III	IDHmut-non-codel	122.7	0	NotAltered	TCGA	NA	NA	NA	NA	NA	NA	NA	NA	NA	NA	NA	NA	3.42336	11.5947
TCGA-DB-5273	Astrocytoma	III	IDHmut-non-codel	82	0	NotAltered	TCGA	NA	NA	NA	NA	NA	NA	NA	NA	NA	NA	NA	NA	4.22763	11.6557
TCGA-DB-5274	Oligoastrocytoma	III	IDHmut-codel	75.3	0	NotAltered	TCGA	NA	NA	NA	NA	NA	NA	NA	NA	NA	NA	NA	NA	4.65607	10.5301
TCGA-DB-5275	Oligoastrocytoma	III	IDHmut-non-codel	47.9	0	NotAltered	TCGA	NA	NA	NA	NA	NA	NA	NA	NA	NA	NA	NA	NA	7.35866	11.8041
TCGA-DB-5276	Oligoastrocytoma	III	IDHmut-non-codel	72.9	0	NotAltered	TCGA	NA	NA	NA	NA	NA	NA	NA	NA	NA	NA	NA	NA	5.19952	11.7654
TCGA-DB-5277	Astrocytoma	III	IDHmut-non-codel	50.9	1	NotAltered	TCGA	NA	NA	NA	NA	NA	NA	NA	NA	NA	NA	NA	NA	4.35804	11.8089
TCGA-DB-5278	Oligodendroglioma	II	IDHmut-codel	91.1	0	NotAltered	TCGA	NA	NA	NA	NA	NA	NA	NA	NA	NA	NA	NA	NA	1.84764	11.7342
TCGA-DB-5279	Oligodendroglioma	II	IDHmut-codel	44.5	0	NotAltered	TCGA	NA	NA	NA	NA	NA	NA	NA	NA	NA	NA	NA	NA	3.41152	12.1227
TCGA-DB-5280	Oligoastrocytoma	II	IDHmut-non-codel	36.6	0	NotAltered	TCGA	NA	NA	NA	NA	NA	NA	NA	NA	NA	NA	NA	NA	3.75313	12.0916
TCGA-DB-5281	Oligoastrocytoma	III	IDHmut-non-codel	78.3	0	NotAltered	TCGA	NA	NA	NA	NA	NA	NA	NA	NA	NA	NA	NA	NA	6.47379	12.0883
TCGA-DB-A4X9	Oligoastrocytoma	II	IDHmut-non-codel	46.4	0	NotAltered	TCGA	NA	NA	NA	NA	NA	NA	NA	NA	NA	NA	NA	NA	3.70261	11.6236
TCGA-DB-A4XA	Oligoastrocytoma	II	IDHmut-codel	18.8	0	NotAltered	TCGA	NA	NA	NA	NA	NA	NA	NA	NA	NA	NA	NA	NA	3.94569	11.2878
TCGA-DB-A4XB	Astrocytoma	III	IDHmut-non-codel	30.2	0	NotAltered	TCGA	NA	NA	NA	NA	NA	NA	NA	NA	NA	NA	NA	NA	2.25798	11.9997
TCGA-DB-A4XC	Oligoastrocytoma	II	IDHmut-non-codel	46.7	0	NotAltered	TCGA	NA	NA	NA	NA	NA	NA	NA	NA	NA	NA	NA	NA	4.29608	11.7335
TCGA-DB-A4XD	Astrocytoma	III	IDHmut-non-codel	39.8	0	NotAltered	TCGA	NA	NA	NA	NA	NA	NA	NA	NA	NA	NA	NA	NA	2.64064	12.0405
TCGA-DB-A4XE	Oligoastrocytoma	III	IDHmut-non-codel	37.4	0	NotAltered	TCGA	NA	NA	NA	NA	NA	NA	NA	NA	NA	NA	NA	NA	4.19671	11.5401
TCGA-DB-A4XF	Astrocytoma	III	IDHmut-non-codel	33.6	0	NotAltered	TCGA	NA	NA	NA	NA	NA	NA	NA	NA	NA	NA	NA	NA	5.21086	11.8717
TCGA-DB-A4XG	Oligodendroglioma	III	IDHmut-codel	73	0	Altered	TCGA	NA	NA	NA	NA	NA	NA	NA	NA	NA	NA	NA	NA	4.26696	10.9507
TCGA-DB-A4XH	Oligoastrocytoma	II	IDHmut-codel	31.6	0	NotAltered	TCGA	NA	NA	NA	NA	NA	NA	NA	NA	NA	NA	NA	NA	3.38337	11.8765
TCGA-DB-A64L	Oligodendroglioma	II	IDHmut-codel	24.2	0	NotAltered	TCGA	NA	NA	NA	NA	NA	NA	NA	NA	NA	NA	NA	NA	6.70025	11.3519
TCGA-DB-A64O	Oligoastrocytoma	II	IDHwt	25.5	1	Altered	TCGA	2926.96	1853.01	7526.57	-194.69	92.08	0.000999001	1	0.000999001	1	0.743257	CL	DEV	6.51164	10.0316
TCGA-DB-A64P	Oligodendroglioma	III	IDHmut-codel	30.1	0	NotAltered	TCGA	NA	NA	NA	NA	NA	NA	NA	NA	NA	NA	NA	NA	5.23144	11.5892
TCGA-DB-A64Q	Oligoastrocytoma	II	IDHmut-codel	6	0	NotAltered	TCGA	NA	NA	NA	NA	NA	NA	NA	NA	NA	NA	NA	NA	4.60254	11.3762
TCGA-DB-A64R	Oligodendroglioma	II	IDHmut-codel	31.4	0	NotAltered	TCGA	NA	NA	NA	NA	NA	NA	NA	NA	NA	NA	NA	NA	2.2811	11.9972
TCGA-DB-A64S	Oligoastrocytoma	II	IDHmut-non-codel	27.5	0	NotAltered	TCGA	NA	NA	NA	NA	NA	NA	NA	NA	NA	NA	NA	NA	4.64859	11.2132
TCGA-DB-A64U	Oligoastrocytoma	II	IDHmut-codel	27.8	0	NotAltered	TCGA	NA	NA	NA	NA	NA	NA	NA	NA	NA	NA	NA	NA	3.63123	11.6673
TCGA-DB-A64V	Oligodendroglioma	II	IDHmut-codel	29.2	0	NotAltered	TCGA	NA	NA	NA	NA	NA	NA	NA	NA	NA	NA	NA	NA	3.96416	10.8618
TCGA-DB-A64W	Oligoastrocytoma	III	IDHmut-codel	14.4	1	NotAltered	TCGA	NA	NA	NA	NA	NA	NA	NA	NA	NA	NA	NA	NA	3.08626	11.6905
TCGA-DB-A64X	Astrocytoma	III	IDHmut-non-codel	18.5	0	NotAltered	TCGA	NA	NA	NA	NA	NA	NA	NA	NA	NA	NA	NA	NA	4.43847	11.0452
TCGA-DB-A75K	Oligoastrocytoma	III	IDHmut-codel	12.1	0	Altered	TCGA	NA	NA	NA	NA	NA	NA	NA	NA	NA	NA	NA	NA	7.62715	11.0079
TCGA-DB-A75L	Astrocytoma	III	IDHmut-non-codel	11.2	0	NotAltered	TCGA	NA	NA	NA	NA	NA	NA	NA	NA	NA	NA	NA	NA	4.90801	11.529
TCGA-DB-A75M	Astrocytoma	II	IDHmut-non-codel	17.9	0	NotAltered	TCGA	NA	NA	NA	NA	NA	NA	NA	NA	NA	NA	NA	NA	3.08928	11.1249
TCGA-DB-A75O	Astrocytoma	III	IDHmut-non-codel	30.7	0	NotAltered	TCGA	NA	NA	NA	NA	NA	NA	NA	NA	NA	NA	NA	NA	6.33721	10.9427
TCGA-DB-A75P	Astrocytoma	II	IDHwt	16.2	0	NotAltered	TCGA	3112.38	1826.61	7290.68	174.685	1017.4	0.000999001	1	0.001998	1	0.0729271	CL	DEV	6.83847	10.9988
TCGA-DH-5140	Oligoastrocytoma	III	IDHwt	20	1	Altered	TCGA	3407.56	1316.1	5718.11	836.997	3989.58	0.000999001	1	0.998002	1	0.000999001	PN	DEV	4.4732	11.9509
TCGA-DH-5141	Oligodendroglioma	III	IDHmut-codel	31.8	0	NotAltered	TCGA	NA	NA	NA	NA	NA	NA	NA	NA	NA	NA	NA	NA	6.55116	11.5054
TCGA-DH-5142	Astrocytoma	III	IDHmut-non-codel	63.9	0	NotAltered	TCGA	NA	NA	NA	NA	NA	NA	NA	NA	NA	NA	NA	NA	4.96809	11.7462
TCGA-DH-5143	Oligoastrocytoma	III	IDHmut-non-codel	46.1	0	NotAltered	TCGA	NA	NA	NA	NA	NA	NA	NA	NA	NA	NA	NA	NA	3.76406	11.636
TCGA-DH-5144	Oligodendroglioma	III	IDHmut-codel	24.6	0	NotAltered	TCGA	NA	NA	NA	NA	NA	NA	NA	NA	NA	NA	NA	NA	2.9612	12.1644
TCGA-DH-A669	Oligodendroglioma	III	IDHmut-codel	30.2	1	NotAltered	TCGA	NA	NA	NA	NA	NA	NA	NA	NA	NA	NA	NA	NA	4.28147	11.5877
TCGA-DH-A66B	Astrocytoma	III	IDHmut-non-codel	42	0	NotAltered	TCGA	NA	NA	NA	NA	NA	NA	NA	NA	NA	NA	NA	NA	6.24886	11.5151
TCGA-DH-A66D	Astrocytoma	III	IDHmut-non-codel	27.8	0	NotAltered	TCGA	NA	NA	NA	NA	NA	NA	NA	NA	NA	NA	NA	NA	5.41117	11.8627
TCGA-DH-A66F	Oligodendroglioma	II	IDHmut-codel	17.2	0	NotAltered	TCGA	NA	NA	NA	NA	NA	NA	NA	NA	NA	NA	NA	NA	3.4478	11.6343
TCGA-DH-A66G	Oligodendroglioma	III	IDHmut-non-codel	17.2	0	NotAltered	TCGA	NA	NA	NA	NA	NA	NA	NA	NA	NA	NA	NA	NA	7.44355	12.1912
TCGA-DH-A7UR	Oligodendroglioma	III	IDHmut-codel	54.2	0	NotAltered	TCGA	NA	NA	NA	NA	NA	NA	NA	NA	NA	NA	NA	NA	3.37484	11.3794
TCGA-DH-A7US	Oligodendroglioma	II	IDHmut-codel	23.2	0	NotAltered	TCGA	NA	NA	NA	NA	NA	NA	NA	NA	NA	NA	NA	NA	2.62052	11.3491
TCGA-DH-A7UT	Astrocytoma	III	IDHmut-non-codel	17.5	1	NotAltered	TCGA	NA	NA	NA	NA	NA	NA	NA	NA	NA	NA	NA	NA	6.16103	11.156
TCGA-DH-A7UU	Astrocytoma	III	IDHmut-non-codel	13.7	0	NotAltered	TCGA	NA	NA	NA	NA	NA	NA	NA	NA	NA	NA	NA	NA	3.26701	11.591
TCGA-DH-A7UV	Astrocytoma	III	IDHmut-non-codel	18.6	0	NotAltered	TCGA	NA	NA	NA	NA	NA	NA	NA	NA	NA	NA	NA	NA	3.75032	11.3373
TCGA-DU-5847	Astrocytoma	III	IDHwt	18	0	Altered	TCGA	2531.07	2200.89	7554.6	1723.71	-840.45	0.494505	0.016983	0.000999001	0.971029	0.999001	CL	INJ	6.81444	10.4889
TCGA-DU-5849	Oligodendroglioma	II	IDHmut-codel	14.6	0	NotAltered	TCGA	NA	NA	NA	NA	NA	NA	NA	NA	NA	NA	NA	NA	3.35552	11.5962
TCGA-DU-5851	Oligoastrocytoma	III	IDHmut-non-codel	17.5	0	NotAltered	TCGA	NA	NA	NA	NA	NA	NA	NA	NA	NA	NA	NA	NA	2.71653	11.8725
TCGA-DU-5852	Oligoastrocytoma	III	IDHwt	6.7	1	NotAltered	TCGA	2982.73	1848.11	7466.27	935.107	893.245	0.000999001	1	0.000999001	1	0.118881	CL	DEV	6.25392	11.5678
TCGA-DU-5853	Oligoastrocytoma	II	IDHmut-non-codel	13.4	0	NotAltered	TCGA	NA	NA	NA	NA	NA	NA	NA	NA	NA	NA	NA	NA	3.91969	12.0189
TCGA-DU-5854	Astrocytoma	III	IDHwt	8.4	0	NotAltered	TCGA	2612.51	2189.71	7747.25	1709.51	-52.9694	0.011988	0.045954	0.000999001	0.971029	0.84016	CL	DEV	5.96431	11.5908
TCGA-DU-5855	Oligoastrocytoma	III	IDHmut-non-codel	6.8	0	NotAltered	TCGA	NA	NA	NA	NA	NA	NA	NA	NA	NA	NA	NA	NA	6.2111	11.7317
TCGA-DU-5870	Oligodendroglioma	II	IDHmut-codel	182.3	0	NotAltered	TCGA	NA	NA	NA	NA	NA	NA	NA	NA	NA	NA	NA	NA	3.08672	12.0821
TCGA-DU-5871	Oligoastrocytoma	II	IDHmut-non-codel	18.9	0	NotAltered	TCGA	NA	NA	NA	NA	NA	NA	NA	NA	NA	NA	NA	NA	5.63976	12.2622
TCGA-DU-5872	Oligoastrocytoma	II	IDHmut-non-codel	17.5	0	NotAltered	TCGA	NA	NA	NA	NA	NA	NA	NA	NA	NA	NA	NA	NA	4.9877	11.5848
TCGA-DU-5874	Oligodendroglioma	II	IDHmut-codel	15.2	0	NotAltered	TCGA	NA	NA	NA	NA	NA	NA	NA	NA	NA	NA	NA	NA	4.6412	12.312
TCGA-DU-6392	Astrocytoma	III	IDHwt	211.2	0	NA	TCGA	3173.03	1690.71	4824.03	2069.84	3237.73	0.000999001	1	1	0.836164	0.000999001	PN	DEV	6.74504	10.3017
TCGA-DU-6393	Oligodendroglioma	III	IDHmut-codel	52.1	1	NotAltered	TCGA	NA	NA	NA	NA	NA	NA	NA	NA	NA	NA	NA	NA	4.13357	12.4639
TCGA-DU-6394	Oligodendroglioma	III	IDHmut-codel	22.4	1	Altered	TCGA	NA	NA	NA	NA	NA	NA	NA	NA	NA	NA	NA	NA	6.89362	10.8521
TCGA-DU-6395	Oligoastrocytoma	II	IDHmut-non-codel	49	1	NotAltered	TCGA	NA	NA	NA	NA	NA	NA	NA	NA	NA	NA	NA	NA	6.23454	11.5607
TCGA-DU-6396	Oligoastrocytoma	III	IDHmut-non-codel	75.2	1	NotAltered	TCGA	NA	NA	NA	NA	NA	NA	NA	NA	NA	NA	NA	NA	4.42956	12.245
TCGA-DU-6397	Oligodendroglioma	III	IDHmut-codel	46.1	1	NotAltered	TCGA	NA	NA	NA	NA	NA	NA	NA	NA	NA	NA	NA	NA	5.8606	11.9461
TCGA-DU-6399	Oligodendroglioma	II	IDHmut-non-codel	65.8	1	NotAltered	TCGA	NA	NA	NA	NA	NA	NA	NA	NA	NA	NA	NA	NA	3.64998	12.2855
TCGA-DU-6400	Oligodendroglioma	II	IDHmut-codel	1.2	1	Altered	TCGA	NA	NA	NA	NA	NA	NA	NA	NA	NA	NA	NA	NA	4.97462	12.1159
TCGA-DU-6401	Oligodendroglioma	II	IDHmut-non-codel	87.5	1	NotAltered	TCGA	NA	NA	NA	NA	NA	NA	NA	NA	NA	NA	NA	NA	7.48987	12.3494
TCGA-DU-6402	Astrocytoma	III	IDHwt	7	1	Altered	TCGA	1883.61	2710.67	7142.66	3966.49	-1487.88	1	0.000999001	0.018981	0.000999001	1	MES	INJ	9.66606	9.39555
TCGA-DU-6403	Oligoastrocytoma	III	IDHwt	11.6	1	NotAltered	TCGA	3256.23	1539.17	5931.55	84.5472	3257.01	0.000999001	1	0.994006	1	0.000999001	PN	DEV	3.63391	11.5677
TCGA-DU-6404	Oligodendroglioma	III	IDHwt	133.7	1	NotAltered	TCGA	2948.81	1755.57	7099.62	1087.3	734.262	0.000999001	1	0.026973	1	0.203796	CL	DEV	7.42467	11.4191
TCGA-DU-6405	Astrocytoma	III	IDHwt	19.9	1	NotAltered	TCGA	2905.72	1798.68	7888.07	657.508	-634.967	0.000999001	1	0.000999001	1	0.994006	CL	DEV	6.83254	11.6624
TCGA-DU-6406	Oligoastrocytoma	III	IDHwt	16.8	1	NotAltered	TCGA	3053.67	1676.63	7934.47	708.889	-259.466	0.000999001	1	0.000999001	1	0.943057	CL	DEV	6.78571	11.6076
TCGA-DU-6407	Oligodendroglioma	II	IDHmut-non-codel	94.5	1	NotAltered	TCGA	NA	NA	NA	NA	NA	NA	NA	NA	NA	NA	NA	NA	3.7075	12.1972
TCGA-DU-6408	Oligodendroglioma	III	IDHmut-non-codel	114.1	1	NotAltered	TCGA	NA	NA	NA	NA	NA	NA	NA	NA	NA	NA	NA	NA	3.95507	12.0046
TCGA-DU-6410	Oligodendroglioma	III	IDHmut-codel	8	0	NotAltered	TCGA	NA	NA	NA	NA	NA	NA	NA	NA	NA	NA	NA	NA	2.44909	12.4519
TCGA-DU-6542	Oligoastrocytoma	III	IDHmut-non-codel	2.4	0	NotAltered	TCGA	NA	NA	NA	NA	NA	NA	NA	NA	NA	NA	NA	NA	5.01319	12.0038
TCGA-DU-7006	Astrocytoma	III	IDHwt	11.5	1	Altered	TCGA	2199.31	2559.8	6976.75	3316.31	695.088	1	0.000999001	0.0789211	0.018981	0.228771	MES	INJ	7.70455	10.2757
TCGA-DU-7007	Astrocytoma	II	IDHmut-non-codel	63	1	NotAltered	TCGA	NA	NA	NA	NA	NA	NA	NA	NA	NA	NA	NA	NA	6.86257	12.1336
TCGA-DU-7008	Oligodendroglioma	II	IDHmut-non-codel	156.2	0	NotAltered	TCGA	NA	NA	NA	NA	NA	NA	NA	NA	NA	NA	NA	NA	3.06166	11.7783
TCGA-DU-7009	Oligodendroglioma	II	IDHmut-codel	154.4	1	NotAltered	TCGA	NA	NA	NA	NA	NA	NA	NA	NA	NA	NA	NA	NA	2.13953	12.401
TCGA-DU-7010	Astrocytoma	III	IDHmut-non-codel	15	1	Altered	TCGA	NA	NA	NA	NA	NA	NA	NA	NA	NA	NA	NA	NA	3.81377	11.7295
TCGA-DU-7011	Oligoastrocytoma	II	IDHmut-non-codel	105.2	1	NotAltered	TCGA	NA	NA	NA	NA	NA	NA	NA	NA	NA	NA	NA	NA	4.50501	11.9201
TCGA-DU-7012	Astrocytoma	III	IDHwt	6.5	1	NotAltered	TCGA	2297.32	2645.81	7123.29	3177.04	-1011.27	1	0.000999001	0.023976	0.044955	1	CL	INJ	5.17138	11.3673
TCGA-DU-7013	Astrocytoma	III	IDHwt	8.8	1	NotAltered	TCGA	3093.96	1632.28	7217.85	355.726	699.158	0.000999001	1	0.00699301	1	0.223776	CL	DEV	4.3652	12.5616
TCGA-DU-7014	Oligodendroglioma	II	NA	117.4	1	NA	TCGA	NA	NA	NA	NA	NA	NA	NA	NA	NA	NA	NA	NA	5.27968	11.5919
TCGA-DU-7015	Oligodendroglioma	II	IDHmut-non-codel	90.8	0	NotAltered	TCGA	NA	NA	NA	NA	NA	NA	NA	NA	NA	NA	NA	NA	3.4803	12.2777
TCGA-DU-7018	Oligodendroglioma	III	IDHmut-codel	30.7	1	NotAltered	TCGA	NA	NA	NA	NA	NA	NA	NA	NA	NA	NA	NA	NA	4.32052	12.304
TCGA-DU-7019	Oligoastrocytoma	NA	IDHmut-non-codel	26.3	0	NotAltered	TCGA	NA	NA	NA	NA	NA	NA	NA	NA	NA	NA	NA	NA	5.26444	11.8233
TCGA-DU-7290	Astrocytoma	III	IDHwt	10.4	1	NotAltered	TCGA	2063.88	2554.36	6575.52	2663.88	-1245.95	1	0.000999001	0.623377	0.287712	1	MES	INJ	6.90443	11.2817
TCGA-DU-7292	Astrocytoma	III	IDHwt	8	1	NotAltered	TCGA	3203.91	1721.28	7221.32	-279.094	1235.33	0.000999001	1	0.00699301	1	0.015984	CL	DEV	4.99095	11.7393
TCGA-DU-7294	Oligodendroglioma	II	IDHmut-codel	94.3	0	NotAltered	TCGA	NA	NA	NA	NA	NA	NA	NA	NA	NA	NA	NA	NA	0.590434	12.3775
TCGA-DU-7298	Astrocytoma	III	IDHmut-non-codel	18.9	1	Altered	TCGA	NA	NA	NA	NA	NA	NA	NA	NA	NA	NA	NA	NA	4.14587	11.1706
TCGA-DU-7299	Astrocytoma	III	IDHmut-non-codel	44	1	Altered	TCGA	NA	NA	NA	NA	NA	NA	NA	NA	NA	NA	NA	NA	4.45411	11.3486
TCGA-DU-7300	Oligodendroglioma	III	IDHmut-codel	62	1	NotAltered	TCGA	NA	NA	NA	NA	NA	NA	NA	NA	NA	NA	NA	NA	3.18655	11.9101
TCGA-DU-7301	Oligodendroglioma	II	IDHmut-non-codel	25.9	1	NotAltered	TCGA	NA	NA	NA	NA	NA	NA	NA	NA	NA	NA	NA	NA	4.15778	12.5589
TCGA-DU-7302	Oligodendroglioma	III	IDHmut-codel	60.3	0	NotAltered	TCGA	NA	NA	NA	NA	NA	NA	NA	NA	NA	NA	NA	NA	3.95388	12.2199
TCGA-DU-7304	Oligoastrocytoma	III	IDHmut-non-codel	23.3	1	NotAltered	TCGA	NA	NA	NA	NA	NA	NA	NA	NA	NA	NA	NA	NA	4.41255	12.1764
TCGA-DU-7306	Oligoastrocytoma	II	IDHmut-non-codel	42	0	NotAltered	TCGA	NA	NA	NA	NA	NA	NA	NA	NA	NA	NA	NA	NA	4.5828	12.2247
TCGA-DU-7309	Oligodendroglioma	III	IDHmut-non-codel	2.8	0	NotAltered	TCGA	NA	NA	NA	NA	NA	NA	NA	NA	NA	NA	NA	NA	3.67826	12.1403
TCGA-DU-8158	Astrocytoma	III	IDHwt	5.1	1	NotAltered	TCGA	2606.19	2335.15	6242.82	1755.5	1759.3	0.017982	0.000999001	0.946054	0.963037	0.001998	PN	INJ	4.90312	11.5565
TCGA-DU-8161	Oligoastrocytoma	III	IDHwt	23.7	1	Altered	TCGA	2625.98	2251.73	7833.84	1415.28	-206.264	0.00599401	0.001998	0.000999001	0.998002	0.918082	CL	INJ	6.93988	9.64901
TCGA-DU-8162	Oligoastrocytoma	III	IDHwt	14.6	1	NotAltered	TCGA	3279.53	1764.74	6871.91	-511.252	1884.87	0.000999001	1	0.168831	1	0.000999001	PN	DEV	4.85204	11.8632
TCGA-DU-8163	Oligoastrocytoma	III	IDHmut-non-codel	20.7	0	NotAltered	TCGA	NA	NA	NA	NA	NA	NA	NA	NA	NA	NA	NA	NA	3.17562	11.8247
TCGA-DU-8164	Oligodendroglioma	II	IDHmut-codel	21.4	0	NotAltered	TCGA	NA	NA	NA	NA	NA	NA	NA	NA	NA	NA	NA	NA	2.22749	12.3064
TCGA-DU-8165	Oligodendroglioma	III	IDHwt	19.1	0	Altered	TCGA	2038.23	2388.68	6417.89	2795.96	-699.673	1	0.000999001	0.824176	0.197802	0.997003	MES	INJ	3.50918	11.2117
TCGA-DU-8166	Oligoastrocytoma	II	IDHmut-non-codel	17	0	NotAltered	TCGA	NA	NA	NA	NA	NA	NA	NA	NA	NA	NA	NA	NA	6.10259	12.2399
TCGA-DU-8167	Oligoastrocytoma	II	IDHmut-non-codel	15.5	0	NotAltered	TCGA	NA	NA	NA	NA	NA	NA	NA	NA	NA	NA	NA	NA	5.39877	11.5045
TCGA-DU-8168	Oligodendroglioma	III	IDHmut-codel	14.2	0	NotAltered	TCGA	NA	NA	NA	NA	NA	NA	NA	NA	NA	NA	NA	NA	4.56772	12.3234
TCGA-DU-A5TP	Astrocytoma	III	IDHmut-non-codel	33.3	0	NotAltered	TCGA	NA	NA	NA	NA	NA	NA	NA	NA	NA	NA	NA	NA	10.8586	10.9888
TCGA-DU-A5TR	Oligoastrocytoma	II	IDHmut-non-codel	29.9	0	NotAltered	TCGA	NA	NA	NA	NA	NA	NA	NA	NA	NA	NA	NA	NA	5.83393	10.5661
TCGA-DU-A5TS	Oligodendroglioma	II	IDHmut-non-codel	31.7	0	NotAltered	TCGA	NA	NA	NA	NA	NA	NA	NA	NA	NA	NA	NA	NA	4.43176	10.9628
TCGA-DU-A5TT	Oligodendroglioma	III	IDHwt	24.4	0	NotAltered	TCGA	2651.01	1926.39	6843.75	654.856	-394.644	0.001998	1	0.205794	1	0.977023	CL	DEV	6.80097	10.5584
TCGA-DU-A5TU	Astrocytoma	II	IDHmut-non-codel	26.2	0	NotAltered	TCGA	NA	NA	NA	NA	NA	NA	NA	NA	NA	NA	NA	NA	5.85932	10.5502
TCGA-DU-A5TW	Astrocytoma	III	IDHmut-non-codel	25	0	NotAltered	TCGA	NA	NA	NA	NA	NA	NA	NA	NA	NA	NA	NA	NA	4.95495	11.1486
TCGA-DU-A5TY	Astrocytoma	III	IDHwt	34	1	NotAltered	TCGA	2538.72	2188.75	7352.68	1779.84	-208.338	0.410589	0.04995	0.001998	0.96004	0.919081	CL	INJ	6.12339	10.9063
TCGA-DU-A6S2	Oligodendroglioma	II	IDHmut-codel	25.5	0	NotAltered	TCGA	NA	NA	NA	NA	NA	NA	NA	NA	NA	NA	NA	NA	8.4713	11.605
TCGA-DU-A6S3	Oligodendroglioma	II	IDHmut-codel	21.6	0	NotAltered	TCGA	NA	NA	NA	NA	NA	NA	NA	NA	NA	NA	NA	NA	4.17133	11.4749
TCGA-DU-A6S6	Oligoastrocytoma	II	IDHmut-codel	95.1	0	NotAltered	TCGA	NA	NA	NA	NA	NA	NA	NA	NA	NA	NA	NA	NA	2.26553	11.1506
TCGA-DU-A6S7	Astrocytoma	III	IDHmut-non-codel	21	0	NotAltered	TCGA	NA	NA	NA	NA	NA	NA	NA	NA	NA	NA	NA	NA	5.5776	11.5834
TCGA-DU-A6S8	Oligodendroglioma	III	IDHmut-codel	22.3	0	NotAltered	TCGA	NA	NA	NA	NA	NA	NA	NA	NA	NA	NA	NA	NA	1.836	11.5491
TCGA-DU-A76K	Oligodendroglioma	II	IDHwt	11.4	1	NotAltered	TCGA	3293.39	1492.34	7434.49	-650.851	595.352	0.000999001	1	0.001998	1	0.294705	CL	DEV	4.29108	11.0434
TCGA-DU-A76L	Oligodendroglioma	III	IDHwt	26.8	1	Altered	TCGA	2400.01	2509.63	5760.47	4225.16	820.634	1	0.000999001	0.998002	0.000999001	0.163836	MES	INJ	7.22051	10.2948
TCGA-DU-A76O	Astrocytoma	II	IDHmut-non-codel	17.2	0	NotAltered	TCGA	NA	NA	NA	NA	NA	NA	NA	NA	NA	NA	NA	NA	3.40945	10.7547
TCGA-DU-A76R	Oligodendroglioma	III	IDHmut-codel	21.3	1	NotAltered	TCGA	NA	NA	NA	NA	NA	NA	NA	NA	NA	NA	NA	NA	2.81723	11.9968
TCGA-DU-A7T6	Oligodendroglioma	III	IDHmut-codel	18	1	NotAltered	TCGA	NA	NA	NA	NA	NA	NA	NA	NA	NA	NA	NA	NA	4.78517	11.6779
TCGA-DU-A7T8	Oligoastrocytoma	III	IDHmut-non-codel	139	1	NotAltered	TCGA	NA	NA	NA	NA	NA	NA	NA	NA	NA	NA	NA	NA	4.18108	11.3005
TCGA-DU-A7TA	Oligodendroglioma	II	IDHmut-non-codel	84.3	0	NotAltered	TCGA	NA	NA	NA	NA	NA	NA	NA	NA	NA	NA	NA	NA	4.5102	11.6555
TCGA-DU-A7TB	Oligodendroglioma	II	IDHwt	51.5	0	NotAltered	TCGA	3134.61	1403.74	5359.33	-533.179	3366.42	0.000999001	1	1	1	0.000999001	PN	DEV	2.9501	11.2569
TCGA-DU-A7TC	Astrocytoma	II	IDHmut-non-codel	37.4	0	NotAltered	TCGA	NA	NA	NA	NA	NA	NA	NA	NA	NA	NA	NA	NA	3.35975	10.5974
TCGA-DU-A7TD	Oligoastrocytoma	III	IDHwt	7.5	1	NotAltered	TCGA	2885.96	1904.64	7096.93	1235.2	437.382	0.000999001	1	0.027972	0.999001	0.417582	CL	DEV	5.45068	11.6622
TCGA-DU-A7TG	Oligodendroglioma	II	IDHmut-non-codel	44.4	1	NotAltered	TCGA	NA	NA	NA	NA	NA	NA	NA	NA	NA	NA	NA	NA	5.29286	11.3989
TCGA-DU-A7TI	Astrocytoma	III	NA	38.9	1	NA	TCGA	NA	NA	NA	NA	NA	NA	NA	NA	NA	NA	NA	NA	7.64004	11.7759
TCGA-DU-A7TJ	Astrocytoma	III	IDHwt	0.6	0	NotAltered	TCGA	2867.71	1783.61	7749.37	1433.68	-569.454	0.000999001	1	0.000999001	0.998002	0.992008	CL	DEV	5.85764	11.6885
TCGA-E1-5302	Astrocytoma	III	IDHmut-non-codel	50.1	1	NotAltered	TCGA	NA	NA	NA	NA	NA	NA	NA	NA	NA	NA	NA	NA	5.46872	12.0885
TCGA-E1-5303	Astrocytoma	III	IDHmut-non-codel	67.5	1	NotAltered	TCGA	NA	NA	NA	NA	NA	NA	NA	NA	NA	NA	NA	NA	5.08012	11.687
TCGA-E1-5304	Astrocytoma	III	IDHmut-non-codel	41.1	1	NotAltered	TCGA	NA	NA	NA	NA	NA	NA	NA	NA	NA	NA	NA	NA	2.34329	12.3846
TCGA-E1-5305	Astrocytoma	III	IDHmut-non-codel	80	1	NotAltered	TCGA	NA	NA	NA	NA	NA	NA	NA	NA	NA	NA	NA	NA	3.55908	12.2115
TCGA-E1-5307	Astrocytoma	III	IDHmut-non-codel	57.9	1	NotAltered	TCGA	NA	NA	NA	NA	NA	NA	NA	NA	NA	NA	NA	NA	4.12367	12.2707
TCGA-E1-5311	Oligodendroglioma	III	IDHmut-codel	134.3	1	NotAltered	TCGA	NA	NA	NA	NA	NA	NA	NA	NA	NA	NA	NA	NA	3.49909	12.3801
TCGA-E1-5318	Oligodendroglioma	II	IDHmut-codel	78.2	1	NotAltered	TCGA	NA	NA	NA	NA	NA	NA	NA	NA	NA	NA	NA	NA	1.95765	12.4309
TCGA-E1-5319	Oligodendroglioma	II	IDHmut-codel	95.6	1	NotAltered	TCGA	NA	NA	NA	NA	NA	NA	NA	NA	NA	NA	NA	NA	4.59663	12.1124
TCGA-E1-5322	Oligoastrocytoma	II	IDHmut-non-codel	130.8	1	NotAltered	TCGA	NA	NA	NA	NA	NA	NA	NA	NA	NA	NA	NA	NA	6.28553	12.1524
TCGA-E1-A7YD	Astrocytoma	III	IDHwt	14.3	1	NotAltered	TCGA	2893.29	1553.08	7107.62	-451.536	1764.1	0.000999001	1	0.026973	1	0.001998	PN	DEV	4.62987	11.2932
TCGA-E1-A7YE	Astrocytoma	III	IDHmut-non-codel	29.1	1	NotAltered	TCGA	NA	NA	NA	NA	NA	NA	NA	NA	NA	NA	NA	NA	6.65112	11.7996
TCGA-E1-A7YH	Astrocytoma	III	IDHmut-non-codel	93.2	1	NotAltered	TCGA	NA	NA	NA	NA	NA	NA	NA	NA	NA	NA	NA	NA	4.66334	11.3468
TCGA-E1-A7YI	Astrocytoma	III	IDHmut-non-codel	3.6	1	NotAltered	TCGA	NA	NA	NA	NA	NA	NA	NA	NA	NA	NA	NA	NA	7.78451	11.5888
TCGA-E1-A7YJ	Astrocytoma	III	IDHwt	19.5	1	NotAltered	TCGA	2546.8	1955.51	7528.19	740.084	-732.155	0.330669	1	0.000999001	1	0.998002	CL	DEV	7.65577	10.9991
TCGA-E1-A7YK	Astrocytoma	III	IDHmut-non-codel	12.4	1	NotAltered	TCGA	NA	NA	NA	NA	NA	NA	NA	NA	NA	NA	NA	NA	6.16277	11.0264
TCGA-E1-A7YL	Astrocytoma	III	IDHwt	16.2	1	NotAltered	TCGA	2541.33	2028.7	6342.91	3754.14	129.513	0.385614	1	0.906094	0.002997	0.717283	MES	DEV	5.93379	10.9402
TCGA-E1-A7YM	Astrocytoma	III	IDHwt	21.3	1	NotAltered	TCGA	3007.87	1563.76	7115.61	-808.564	799.133	0.000999001	1	0.023976	1	0.170829	CL	DEV	2.15095	11.0104
TCGA-E1-A7YN	Astrocytoma	III	IDHwt	23.9	1	NotAltered	TCGA	2170.2	2728.97	6421.39	2753.18	-583.339	1	0.000999001	0.822178	0.21978	0.992008	MES	INJ	7.59181	10.8673
TCGA-E1-A7YO	Oligodendroglioma	III	IDHmut-codel	75	1	NotAltered	TCGA	NA	NA	NA	NA	NA	NA	NA	NA	NA	NA	NA	NA	3.76065	12.1583
TCGA-E1-A7YQ	Oligodendroglioma	III	IDHwt	51.9	1	NotAltered	TCGA	2353.16	2389.67	6898.86	3583.19	-1015.75	1	0.000999001	0.141858	0.002997	1	MES	INJ	6.12484	10.9476
TCGA-E1-A7YS	Oligodendroglioma	III	IDHmut-codel	15.3	1	NotAltered	TCGA	NA	NA	NA	NA	NA	NA	NA	NA	NA	NA	NA	NA	4.87441	12.3792
TCGA-E1-A7YU	Oligoastrocytoma	III	IDHmut-non-codel	0.8	1	NotAltered	TCGA	NA	NA	NA	NA	NA	NA	NA	NA	NA	NA	NA	NA	4.28658	11.2707
TCGA-E1-A7YV	Oligoastrocytoma	III	IDHmut-non-codel	32.4	1	NotAltered	TCGA	NA	NA	NA	NA	NA	NA	NA	NA	NA	NA	NA	NA	5.10796	11.662
TCGA-E1-A7YW	Oligoastrocytoma	II	IDHmut-non-codel	36.8	1	NotAltered	TCGA	NA	NA	NA	NA	NA	NA	NA	NA	NA	NA	NA	NA	6.60635	11.6313
TCGA-E1-A7YY	Oligodendroglioma	II	IDHmut-non-codel	146.1	1	NotAltered	TCGA	NA	NA	NA	NA	NA	NA	NA	NA	NA	NA	NA	NA	4.78548	11.3358
TCGA-E1-A7Z2	Oligodendroglioma	II	IDHwt	13.1	1	NotAltered	TCGA	3130.36	1480.43	7283.06	-952.291	621.571	0.000999001	1	0.001998	1	0.280719	CL	DEV	5.16102	10.801
TCGA-E1-A7Z3	Astrocytoma	II	IDHmut-non-codel	73.5	1	NotAltered	TCGA	NA	NA	NA	NA	NA	NA	NA	NA	NA	NA	NA	NA	7.76947	11.3842
TCGA-E1-A7Z4	Astrocytoma	II	IDHmut-non-codel	145.1	1	NotAltered	TCGA	NA	NA	NA	NA	NA	NA	NA	NA	NA	NA	NA	NA	4.47739	11.3784
TCGA-E1-A7Z6	Astrocytoma	II	IDHmut-non-codel	32.4	1	NotAltered	TCGA	NA	NA	NA	NA	NA	NA	NA	NA	NA	NA	NA	NA	4.55753	12.1528
TCGA-EZ-7264	Oligodendroglioma	II	IDHmut-codel	39.5	0	NotAltered	TCGA	NA	NA	NA	NA	NA	NA	NA	NA	NA	NA	NA	NA	1.94707	12.4293
TCGA-F6-A8O3	Oligodendroglioma	II	IDHmut-codel	0.2	0	NotAltered	TCGA	NA	NA	NA	NA	NA	NA	NA	NA	NA	NA	NA	NA	2.00349	12.0733
TCGA-F6-A8O4	Astrocytoma	II	IDHmut-non-codel	0.2	0	NotAltered	TCGA	NA	NA	NA	NA	NA	NA	NA	NA	NA	NA	NA	NA	1.6433	11.7263
TCGA-FG-5962	Oligodendroglioma	III	IDHmut-codel	47.8	0	NotAltered	TCGA	NA	NA	NA	NA	NA	NA	NA	NA	NA	NA	NA	NA	4.06096	12.1735
TCGA-FG-5963	Astrocytoma	III	IDHwt	25.5	1	Altered	TCGA	2668.16	2057.33	5753.97	1898.79	1828.42	0.001998	0.992008	0.998002	0.92008	0.000999001	PN	DEV	5.60007	10.6858
TCGA-FG-5964	Oligodendroglioma	II	IDHmut-codel	52.2	0	NotAltered	TCGA	NA	NA	NA	NA	NA	NA	NA	NA	NA	NA	NA	NA	5.38748	11.5423
TCGA-FG-5965	Oligoastrocytoma	II	IDHmut-non-codel	36.8	1	NotAltered	TCGA	NA	NA	NA	NA	NA	NA	NA	NA	NA	NA	NA	NA	5.18994	12.4276
TCGA-FG-6688	Astrocytoma	III	IDHwt	18.8	0	NotAltered	TCGA	2486.4	2199.44	6775.71	1400	97.5366	0.886114	0.018981	0.297702	0.998002	0.742258	CL	INJ	8.13313	10.9971
TCGA-FG-6689	Astrocytoma	II	IDHmut-non-codel	14.9	0	NotAltered	TCGA	NA	NA	NA	NA	NA	NA	NA	NA	NA	NA	NA	NA	4.75424	11.691
TCGA-FG-6690	Oligodendroglioma	II	IDHmut-non-codel	42.5	0	NotAltered	TCGA	NA	NA	NA	NA	NA	NA	NA	NA	NA	NA	NA	NA	3.25772	12.0696
TCGA-FG-6691	Astrocytoma	II	IDHmut-non-codel	41.3	0	NotAltered	TCGA	NA	NA	NA	NA	NA	NA	NA	NA	NA	NA	NA	NA	3.315	12.2086
TCGA-FG-6692	Oligodendroglioma	III	IDHwt	18.4	1	NotAltered	TCGA	2573.35	1922.97	7381.07	2030.13	-1032.86	0.108891	1	0.001998	0.857143	1	CL	DEV	7.01542	10.8459
TCGA-FG-7634	Oligodendroglioma	II	IDHmut-codel	15.4	0	NotAltered	TCGA	NA	NA	NA	NA	NA	NA	NA	NA	NA	NA	NA	NA	5.89053	12.5306
TCGA-FG-7636	Astrocytoma	III	IDHmut-non-codel	17.9	0	NotAltered	TCGA	NA	NA	NA	NA	NA	NA	NA	NA	NA	NA	NA	NA	4.39025	11.8996
TCGA-FG-7637	Oligoastrocytoma	II	IDHmut-non-codel	40.1	0	NA	TCGA	NA	NA	NA	NA	NA	NA	NA	NA	NA	NA	NA	NA	6.25538	12.321
TCGA-FG-7638	Oligodendroglioma	III	IDHmut-codel	22.6	0	NotAltered	TCGA	NA	NA	NA	NA	NA	NA	NA	NA	NA	NA	NA	NA	4.38416	11.9667
TCGA-FG-7641	Oligodendroglioma	II	IDHmut-codel	20.6	0	NotAltered	TCGA	NA	NA	NA	NA	NA	NA	NA	NA	NA	NA	NA	NA	1.38156	12.2536
TCGA-FG-7643	Oligoastrocytoma	II	IDHwt	20.1	0	NotAltered	TCGA	3204.42	1818.13	7085.83	-118.717	1666.08	0.000999001	1	0.032967	1	0.001998	PN	DEV	6.35897	11.5517
TCGA-FG-8181	Oligoastrocytoma	III	IDHwt	28.3	0	NA	TCGA	3197.3	1779.77	6004.87	247.288	2127.77	0.000999001	1	0.993007	1	0.000999001	PN	DEV	6.72469	11.464
TCGA-FG-8182	Oligodendroglioma	II	IDHmut-non-codel	13.7	0	NotAltered	TCGA	NA	NA	NA	NA	NA	NA	NA	NA	NA	NA	NA	NA	3.23294	11.9033
TCGA-FG-8185	Astrocytoma	III	IDHmut-non-codel	14.2	0	NotAltered	TCGA	NA	NA	NA	NA	NA	NA	NA	NA	NA	NA	NA	NA	3.53867	11.7978
TCGA-FG-8186	Oligoastrocytoma	III	IDHmut-codel	16	0	NotAltered	TCGA	NA	NA	NA	NA	NA	NA	NA	NA	NA	NA	NA	NA	4.03095	11.9306
TCGA-FG-8187	Oligoastrocytoma	II	IDHmut-codel	20.1	0	NotAltered	TCGA	NA	NA	NA	NA	NA	NA	NA	NA	NA	NA	NA	NA	3.7988	11.8023
TCGA-FG-8188	Oligoastrocytoma	II	IDHmut-non-codel	15	0	NotAltered	TCGA	NA	NA	NA	NA	NA	NA	NA	NA	NA	NA	NA	NA	3.1557	11.9667
TCGA-FG-8189	Oligodendroglioma	II	IDHmut-non-codel	22.5	0	NA	TCGA	NA	NA	NA	NA	NA	NA	NA	NA	NA	NA	NA	NA	0.901494	11.794
TCGA-FG-8191	Oligodendroglioma	III	IDHmut-non-codel	32.6	0	NotAltered	TCGA	NA	NA	NA	NA	NA	NA	NA	NA	NA	NA	NA	NA	8.80844	11.6564
TCGA-FG-A4MT	Oligodendroglioma	II	IDHmut-non-codel	38.3	0	NotAltered	TCGA	NA	NA	NA	NA	NA	NA	NA	NA	NA	NA	NA	NA	2.94598	11.1056
TCGA-FG-A4MU	Oligoastrocytoma	III	IDHwt	10.7	0	NotAltered	TCGA	2611.66	2157.23	7521.95	3688.53	-1102.44	0.012987	0.245754	0.000999001	0.002997	1	CL	DEV	6.99845	11.1219
TCGA-FG-A4MW	Oligoastrocytoma	III	IDHwt	18.4	1	NotAltered	TCGA	3148.51	1655.71	7037.46	591.607	1950.4	0.000999001	1	0.045954	1	0.000999001	PN	DEV	4.90969	10.8503
TCGA-FG-A4MX	Astrocytoma	II	IDHmut-non-codel	18.7	0	NotAltered	TCGA	NA	NA	NA	NA	NA	NA	NA	NA	NA	NA	NA	NA	6.59821	10.7333
TCGA-FG-A4MY	Oligoastrocytoma	II	IDHmut-non-codel	23.7	0	Altered	TCGA	NA	NA	NA	NA	NA	NA	NA	NA	NA	NA	NA	NA	4.26733	11.2908
TCGA-FG-A60J	Oligoastrocytoma	II	IDHmut-non-codel	14.8	0	Altered	TCGA	NA	NA	NA	NA	NA	NA	NA	NA	NA	NA	NA	NA	4.95238	11.4761
TCGA-FG-A60K	Oligoastrocytoma	II	IDHmut-codel	17.8	0	NotAltered	TCGA	NA	NA	NA	NA	NA	NA	NA	NA	NA	NA	NA	NA	5.10321	12.1486
TCGA-FG-A60L	Astrocytoma	II	IDHmut-non-codel	21.5	0	NotAltered	TCGA	NA	NA	NA	NA	NA	NA	NA	NA	NA	NA	NA	NA	4.9791	10.506
TCGA-FG-A6IZ	Oligodendroglioma	II	IDHmut-codel	15	0	NotAltered	TCGA	NA	NA	NA	NA	NA	NA	NA	NA	NA	NA	NA	NA	2.61249	10.74
TCGA-FG-A6J1	Oligodendroglioma	II	IDHmut-codel	16.4	0	NotAltered	TCGA	NA	NA	NA	NA	NA	NA	NA	NA	NA	NA	NA	NA	2.71114	10.5536
TCGA-FG-A6J3	Astrocytoma	III	IDHmut-non-codel	22.3	0	NotAltered	TCGA	NA	NA	NA	NA	NA	NA	NA	NA	NA	NA	NA	NA	6.30062	10.38
TCGA-FG-A70Y	Oligodendroglioma	II	IDHmut-non-codel	28.5	0	NotAltered	TCGA	NA	NA	NA	NA	NA	NA	NA	NA	NA	NA	NA	NA	3.27987	11.2331
TCGA-FG-A70Z	Oligoastrocytoma	III	IDHwt	10.8	0	NotAltered	TCGA	2972.22	1940.89	6872.9	1940.54	1770.83	0.000999001	1	0.165834	0.903097	0.001998	PN	DEV	5.52261	11.0486
TCGA-FG-A710	Oligodendroglioma	II	IDHmut-codel	36.7	0	NotAltered	TCGA	NA	NA	NA	NA	NA	NA	NA	NA	NA	NA	NA	NA	5.31613	11.5319
TCGA-FG-A711	Oligodendroglioma	II	IDHmut-non-codel	48.7	1	NotAltered	TCGA	NA	NA	NA	NA	NA	NA	NA	NA	NA	NA	NA	NA	3.40432	11.1931
TCGA-FG-A713	Oligoastrocytoma	II	IDHmut-codel	20.4	0	NotAltered	TCGA	NA	NA	NA	NA	NA	NA	NA	NA	NA	NA	NA	NA	3.49576	11.4008
TCGA-FG-A87N	Astrocytoma	III	IDHmut-non-codel	18.6	0	Altered	TCGA	NA	NA	NA	NA	NA	NA	NA	NA	NA	NA	NA	NA	5.29784	10.531
TCGA-FG-A87Q	Astrocytoma	III	IDHwt	5.7	0	NotAltered	TCGA	2726.33	2088.53	7667.81	644.845	247.304	0.000999001	0.932068	0.000999001	1	0.612388	CL	DEV	6.4462	11.2544
TCGA-FN-7833	Oligoastrocytoma	III	IDHmut-non-codel	27.5	0	NotAltered	TCGA	NA	NA	NA	NA	NA	NA	NA	NA	NA	NA	NA	NA	4.91521	11.8966
TCGA-HT-7467	Oligodendroglioma	II	IDHmut-codel	0.1	0	NotAltered	TCGA	NA	NA	NA	NA	NA	NA	NA	NA	NA	NA	NA	NA	2.82042	11.9309
TCGA-HT-7468	Oligodendroglioma	III	IDHmut-codel	6.7	0	NotAltered	TCGA	NA	NA	NA	NA	NA	NA	NA	NA	NA	NA	NA	NA	3.03905	12.6002
TCGA-HT-7469	Oligodendroglioma	III	IDHwt	11.5	1	NotAltered	TCGA	3013.94	1323.7	7425.36	-488.228	-30.3334	0.000999001	1	0.001998	1	0.825175	CL	DEV	6.00017	12.4071
TCGA-HT-7470	Oligodendroglioma	III	IDHmut-non-codel	40.1	1	NotAltered	TCGA	NA	NA	NA	NA	NA	NA	NA	NA	NA	NA	NA	NA	3.63027	12.0366
TCGA-HT-7471	Oligodendroglioma	III	IDHmut-codel	0.1	0	NotAltered	TCGA	NA	NA	NA	NA	NA	NA	NA	NA	NA	NA	NA	NA	5.75679	11.9777
TCGA-HT-7472	Oligodendroglioma	II	IDHmut-non-codel	0	0	NotAltered	TCGA	NA	NA	NA	NA	NA	NA	NA	NA	NA	NA	NA	NA	3.39794	12.2268
TCGA-HT-7473	Oligoastrocytoma	II	IDHmut-non-codel	16.5	0	NotAltered	TCGA	NA	NA	NA	NA	NA	NA	NA	NA	NA	NA	NA	NA	4.49057	12.2572
TCGA-HT-7474	Oligoastrocytoma	II	IDHmut-non-codel	3.7	0	NotAltered	TCGA	NA	NA	NA	NA	NA	NA	NA	NA	NA	NA	NA	NA	4.34966	11.7601
TCGA-HT-7475	Oligoastrocytoma	III	IDHmut-non-codel	17.4	0	NotAltered	TCGA	NA	NA	NA	NA	NA	NA	NA	NA	NA	NA	NA	NA	2.53142	11.6936
TCGA-HT-7476	Astrocytoma	II	IDHmut-non-codel	6.5	0	NotAltered	TCGA	NA	NA	NA	NA	NA	NA	NA	NA	NA	NA	NA	NA	5.21786	11.3468
TCGA-HT-7477	Astrocytoma	III	IDHmut-non-codel	24.3	0	Altered	TCGA	NA	NA	NA	NA	NA	NA	NA	NA	NA	NA	NA	NA	5.16236	11.1786
TCGA-HT-7478	Astrocytoma	II	IDHmut-non-codel	6.4	0	NotAltered	TCGA	NA	NA	NA	NA	NA	NA	NA	NA	NA	NA	NA	NA	5.30285	11.5437
TCGA-HT-7479	Astrocytoma	III	IDHmut-non-codel	40.3	0	NotAltered	TCGA	NA	NA	NA	NA	NA	NA	NA	NA	NA	NA	NA	NA	3.4738	11.6997
TCGA-HT-7480	Oligodendroglioma	II	IDHmut-codel	75.2	0	NotAltered	TCGA	NA	NA	NA	NA	NA	NA	NA	NA	NA	NA	NA	NA	3.34561	12.4446
TCGA-HT-7481	Oligodendroglioma	II	IDHmut-codel	95.9	0	NotAltered	TCGA	NA	NA	NA	NA	NA	NA	NA	NA	NA	NA	NA	NA	2.11839	11.736
TCGA-HT-7482	Oligoastrocytoma	II	IDHmut-non-codel	106.9	0	NotAltered	TCGA	NA	NA	NA	NA	NA	NA	NA	NA	NA	NA	NA	NA	5.08383	11.9502
TCGA-HT-7483	Oligoastrocytoma	II	IDHmut-non-codel	172.8	0	NotAltered	TCGA	NA	NA	NA	NA	NA	NA	NA	NA	NA	NA	NA	NA	5.56139	12.078
TCGA-HT-7485	Astrocytoma	II	IDHmut-non-codel	4	0	NotAltered	TCGA	NA	NA	NA	NA	NA	NA	NA	NA	NA	NA	NA	NA	2.39177	12.3467
TCGA-HT-7601	Astrocytoma	III	IDHmut-non-codel	5	0	NotAltered	TCGA	NA	NA	NA	NA	NA	NA	NA	NA	NA	NA	NA	NA	4.74112	11.9749
TCGA-HT-7602	Oligodendroglioma	II	IDHmut-non-codel	29.9	0	NotAltered	TCGA	NA	NA	NA	NA	NA	NA	NA	NA	NA	NA	NA	NA	3.24015	11.6842
TCGA-HT-7603	Oligodendroglioma	II	IDHmut-non-codel	23.2	0	NotAltered	TCGA	NA	NA	NA	NA	NA	NA	NA	NA	NA	NA	NA	NA	2.5081	11.4214
TCGA-HT-7604	Astrocytoma	II	IDHmut-non-codel	122.5	0	NotAltered	TCGA	NA	NA	NA	NA	NA	NA	NA	NA	NA	NA	NA	NA	4.82496	11.9867
TCGA-HT-7605	Oligodendroglioma	II	IDHmut-codel	4.6	0	NotAltered	TCGA	NA	NA	NA	NA	NA	NA	NA	NA	NA	NA	NA	NA	2.7031	11.8206
TCGA-HT-7606	Astrocytoma	II	IDHmut-non-codel	17.3	0	NotAltered	TCGA	NA	NA	NA	NA	NA	NA	NA	NA	NA	NA	NA	NA	3.53743	11.8146
TCGA-HT-7607	Astrocytoma	II	IDHmut-codel	3.2	1	NotAltered	TCGA	NA	NA	NA	NA	NA	NA	NA	NA	NA	NA	NA	NA	4.41788	11.9273
TCGA-HT-7608	Oligoastrocytoma	II	IDHmut-codel	22.1	0	NotAltered	TCGA	NA	NA	NA	NA	NA	NA	NA	NA	NA	NA	NA	NA	5.49868	12.3033
TCGA-HT-7609	Oligoastrocytoma	III	IDHmut-non-codel	46	0	NotAltered	TCGA	NA	NA	NA	NA	NA	NA	NA	NA	NA	NA	NA	NA	4.77337	12.0955
TCGA-HT-7610	Oligoastrocytoma	II	IDHmut-non-codel	56.1	0	NotAltered	TCGA	NA	NA	NA	NA	NA	NA	NA	NA	NA	NA	NA	NA	3.43467	12.2351
TCGA-HT-7611	Oligoastrocytoma	II	IDHmut-non-codel	57.6	0	NotAltered	TCGA	NA	NA	NA	NA	NA	NA	NA	NA	NA	NA	NA	NA	3.79083	12.2575
TCGA-HT-7616	Oligodendroglioma	III	IDHmut-codel	0.2	1	NotAltered	TCGA	NA	NA	NA	NA	NA	NA	NA	NA	NA	NA	NA	NA	5.58659	11.9331
TCGA-HT-7620	Oligodendroglioma	III	IDHmut-codel	14.3	0	NotAltered	TCGA	NA	NA	NA	NA	NA	NA	NA	NA	NA	NA	NA	NA	2.39006	11.6356
TCGA-HT-7676	Oligodendroglioma	II	IDHmut-non-codel	0.2	0	NotAltered	TCGA	NA	NA	NA	NA	NA	NA	NA	NA	NA	NA	NA	NA	3.59748	11.5149
TCGA-HT-7677	Oligodendroglioma	III	IDHmut-codel	16.2	0	NotAltered	TCGA	NA	NA	NA	NA	NA	NA	NA	NA	NA	NA	NA	NA	4.945	12.2068
TCGA-HT-7680	Astrocytoma	II	IDHwt	0.8	0	NotAltered	TCGA	2306.99	2335.94	7014.58	917.208	-1556.14	1	0.000999001	0.0559441	1	1	CL	INJ	5.48831	12.2098
TCGA-HT-7681	Oligoastrocytoma	II	IDHmut-codel	44.7	0	NotAltered	TCGA	NA	NA	NA	NA	NA	NA	NA	NA	NA	NA	NA	NA	2.6507	11.4888
TCGA-HT-7684	Oligoastrocytoma	III	IDHmut-non-codel	6	0	NotAltered	TCGA	NA	NA	NA	NA	NA	NA	NA	NA	NA	NA	NA	NA	8.60384	10.8948
TCGA-HT-7686	Astrocytoma	III	IDHmut-non-codel	42.7	0	NotAltered	TCGA	NA	NA	NA	NA	NA	NA	NA	NA	NA	NA	NA	NA	4.57896	11.5892
TCGA-HT-7687	Oligodendroglioma	III	IDHmut-codel	0.1	0	NotAltered	TCGA	NA	NA	NA	NA	NA	NA	NA	NA	NA	NA	NA	NA	3.28106	12.3195
TCGA-HT-7688	Oligodendroglioma	III	IDHmut-non-codel	31.7	0	NotAltered	TCGA	NA	NA	NA	NA	NA	NA	NA	NA	NA	NA	NA	NA	3.33106	11.6496
TCGA-HT-7689	Oligodendroglioma	II	IDHmut-non-codel	15	0	Altered	TCGA	NA	NA	NA	NA	NA	NA	NA	NA	NA	NA	NA	NA	3.67302	11.8933
TCGA-HT-7690	Oligoastrocytoma	III	IDHmut-non-codel	0.1	0	NotAltered	TCGA	NA	NA	NA	NA	NA	NA	NA	NA	NA	NA	NA	NA	5.12907	11.2767
TCGA-HT-7691	Astrocytoma	II	IDHwt	0.1	0	NotAltered	TCGA	2540.49	2209.98	6849.09	1734.11	641.82	0.392607	0.00799201	0.198801	0.964036	0.273726	CL	INJ	8.23963	11.5634
TCGA-HT-7692	Oligoastrocytoma	II	IDHmut-codel	3	0	NotAltered	TCGA	NA	NA	NA	NA	NA	NA	NA	NA	NA	NA	NA	NA	4.13941	11.59
TCGA-HT-7693	Oligodendroglioma	II	IDHmut-non-codel	17.5	0	NotAltered	TCGA	NA	NA	NA	NA	NA	NA	NA	NA	NA	NA	NA	NA	6.79997	11.9569
TCGA-HT-7694	Oligodendroglioma	III	IDHmut-codel	6.9	0	NotAltered	TCGA	NA	NA	NA	NA	NA	NA	NA	NA	NA	NA	NA	NA	2.44186	11.7205
TCGA-HT-7695	Oligodendroglioma	II	IDHmut-codel	14.5	0	NotAltered	TCGA	NA	NA	NA	NA	NA	NA	NA	NA	NA	NA	NA	NA	-0.407938	12.1823
TCGA-HT-7854	Astrocytoma	II	IDHwt	39.5	0	NotAltered	TCGA	2623.98	2245.99	7227.69	706.333	-172.344	0.00699301	0.001998	0.00699301	1	0.908092	CL	INJ	7.03232	11.7816
TCGA-HT-7855	Astrocytoma	III	IDHmut-non-codel	19.2	0	NotAltered	TCGA	NA	NA	NA	NA	NA	NA	NA	NA	NA	NA	NA	NA	3.81103	11.9571
TCGA-HT-7856	Oligodendroglioma	III	IDHmut-codel	39.1	0	NotAltered	TCGA	NA	NA	NA	NA	NA	NA	NA	NA	NA	NA	NA	NA	1.9571	11.6896
TCGA-HT-7857	Astrocytoma	III	IDHwt	0.2	0	Altered	TCGA	1849.58	2950.4	5453.07	4424.48	-189.954	1	0.000999001	1	0.000999001	0.914086	MES	INJ	8.78644	10.3752
TCGA-HT-7858	Astrocytoma	II	IDHmut-non-codel	50.6	0	NotAltered	TCGA	NA	NA	NA	NA	NA	NA	NA	NA	NA	NA	NA	NA	4.38112	11.7931
TCGA-HT-7860	Astrocytoma	III	IDHwt	0.5	0	Altered	TCGA	2827.15	2086.29	8343.23	484.816	-1229.53	0.000999001	0.941059	0.000999001	1	1	CL	DEV	5.24656	11.3257
TCGA-HT-7873	Oligoastrocytoma	II	IDHmut-non-codel	23.6	0	NotAltered	TCGA	NA	NA	NA	NA	NA	NA	NA	NA	NA	NA	NA	NA	3.83154	11.8727
TCGA-HT-7874	Oligodendroglioma	III	IDHmut-codel	37.2	0	NotAltered	TCGA	NA	NA	NA	NA	NA	NA	NA	NA	NA	NA	NA	NA	3.35311	11.9681
TCGA-HT-7875	Oligodendroglioma	II	IDHmut-codel	0.3	0	NotAltered	TCGA	NA	NA	NA	NA	NA	NA	NA	NA	NA	NA	NA	NA	2.52532	12.306
TCGA-HT-7877	Oligodendroglioma	II	IDHmut-codel	0.1	0	NotAltered	TCGA	NA	NA	NA	NA	NA	NA	NA	NA	NA	NA	NA	NA	4.41285	12.0911
TCGA-HT-7879	Oligoastrocytoma	III	IDHmut-non-codel	3.7	0	NotAltered	TCGA	NA	NA	NA	NA	NA	NA	NA	NA	NA	NA	NA	NA	3.02255	11.721
TCGA-HT-7880	Oligoastrocytoma	II	IDHmut-non-codel	5.3	0	NotAltered	TCGA	NA	NA	NA	NA	NA	NA	NA	NA	NA	NA	NA	NA	2.63476	11.3227
TCGA-HT-7881	Oligodendroglioma	II	IDHmut-codel	35.5	0	NotAltered	TCGA	NA	NA	NA	NA	NA	NA	NA	NA	NA	NA	NA	NA	0.891108	11.7012
TCGA-HT-7882	Oligodendroglioma	III	IDHwt	3.7	1	NotAltered	TCGA	1281.97	3714.11	5969.79	6815.21	-1252.55	1	0.000999001	0.994006	0.000999001	1	MES	INJ	10.2163	10.9057
TCGA-HT-7884	Astrocytoma	II	IDHmut-non-codel	11.3	0	NotAltered	TCGA	NA	NA	NA	NA	NA	NA	NA	NA	NA	NA	NA	NA	2.59216	12.0005
TCGA-HT-7902	Oligoastrocytoma	II	IDHmut-non-codel	31.4	0	NotAltered	TCGA	NA	NA	NA	NA	NA	NA	NA	NA	NA	NA	NA	NA	3.86064	11.6279
TCGA-HT-8010	Oligodendroglioma	II	IDHmut-codel	1.6	0	Altered	TCGA	NA	NA	NA	NA	NA	NA	NA	NA	NA	NA	NA	NA	3.10252	11.4303
TCGA-HT-8011	Astrocytoma	III	IDHwt	16.2	0	NotAltered	TCGA	2892.24	1524.77	6300.89	391.145	888.61	0.000999001	1	0.925075	1	0.120879	PN	DEV	5.40793	11.488
TCGA-HT-8012	Oligodendroglioma	II	IDHmut-codel	9.4	0	NotAltered	TCGA	NA	NA	NA	NA	NA	NA	NA	NA	NA	NA	NA	NA	2.08746	12.1709
TCGA-HT-8013	Oligoastrocytoma	II	IDHmut-non-codel	63.6	1	NotAltered	TCGA	NA	NA	NA	NA	NA	NA	NA	NA	NA	NA	NA	NA	5.04796	11.4621
TCGA-HT-8015	Astrocytoma	II	IDHwt	0.1	0	NotAltered	TCGA	3147.19	1863.86	6428.23	-131.297	1912.67	0.000999001	1	0.814186	1	0.000999001	PN	DEV	5.44378	11.5492
TCGA-HT-8018	Oligoastrocytoma	II	IDHmut-non-codel	37.9	1	NotAltered	TCGA	NA	NA	NA	NA	NA	NA	NA	NA	NA	NA	NA	NA	6.83607	11.4253
TCGA-HT-8019	Oligodendroglioma	III	IDHwt	33	0	NotAltered	TCGA	3348.06	1505.48	6059.6	-1138.61	2338.55	0.000999001	1	0.986014	1	0.000999001	PN	DEV	2.25966	11.4085
TCGA-HT-8104	Astrocytoma	III	IDHwt	12.2	0	NotAltered	TCGA	2807.93	1994.24	7656.36	606.362	620.509	0.000999001	1	0.000999001	1	0.282717	CL	DEV	6.17017	11.5866
TCGA-HT-8105	Oligodendroglioma	III	IDHmut-codel	6.2	0	NotAltered	TCGA	NA	NA	NA	NA	NA	NA	NA	NA	NA	NA	NA	NA	8.53611	12.0353
TCGA-HT-8106	Astrocytoma	III	IDHmut-non-codel	0.1	0	Altered	TCGA	NA	NA	NA	NA	NA	NA	NA	NA	NA	NA	NA	NA	6.19856	11.3248
TCGA-HT-8107	Oligodendroglioma	II	IDHwt	0.5	0	NotAltered	TCGA	3354.85	1704.66	6236.83	-683.938	2123.63	0.000999001	1	0.948052	1	0.000999001	PN	DEV	6.38411	11.917
TCGA-HT-8108	Oligodendroglioma	II	IDHmut-non-codel	2.5	0	NotAltered	TCGA	NA	NA	NA	NA	NA	NA	NA	NA	NA	NA	NA	NA	3.06376	11.7478
TCGA-HT-8109	Oligodendroglioma	III	IDHmut-codel	5.6	0	NotAltered	TCGA	NA	NA	NA	NA	NA	NA	NA	NA	NA	NA	NA	NA	2.0732	12.1984
TCGA-HT-8110	Astrocytoma	III	IDHwt	13.8	0	NotAltered	TCGA	2583.66	2128.58	7212.05	1276.49	-7.56614	0.0629371	0.6004	0.00799201	0.998002	0.809191	CL	DEV	5.14209	11.1113
TCGA-HT-8111	Oligoastrocytoma	III	IDHmut-non-codel	0.2	0	NotAltered	TCGA	NA	NA	NA	NA	NA	NA	NA	NA	NA	NA	NA	NA	4.73698	11.834
TCGA-HT-8113	Oligodendroglioma	II	IDHmut-non-codel	29.6	0	NotAltered	TCGA	NA	NA	NA	NA	NA	NA	NA	NA	NA	NA	NA	NA	3.6508	11.6547
TCGA-HT-8114	Oligoastrocytoma	III	IDHmut-non-codel	34.2	0	NotAltered	TCGA	NA	NA	NA	NA	NA	NA	NA	NA	NA	NA	NA	NA	3.93782	12.2101
TCGA-HT-8558	Oligodendroglioma	II	IDHwt	13.7	0	NA	TCGA	3297.95	1551.3	5779.67	-1299.53	2640.82	0.000999001	1	0.998002	1	0.000999001	PN	DEV	3.64904	11.5633
TCGA-HT-8563	Astrocytoma	III	IDHmut-non-codel	28.3	0	NotAltered	TCGA	NA	NA	NA	NA	NA	NA	NA	NA	NA	NA	NA	NA	6.59505	11.492
TCGA-HT-8564	Astrocytoma	III	IDHwt	15.7	0	Altered	TCGA	3320.21	1579.52	7061.72	-206.369	1555.61	0.000999001	1	0.037962	1	0.002997	PN	DEV	4.80744	11.1552
TCGA-HT-A4DS	Astrocytoma	III	IDHwt	0.2	0	Altered	TCGA	2770.27	1674.55	6308.33	490.493	1195.16	0.000999001	1	0.921079	1	0.023976	PN	DEV	7.06404	8.70025
TCGA-HT-A4DV	Oligodendroglioma	III	IDHmut-codel	26	0	NotAltered	TCGA	NA	NA	NA	NA	NA	NA	NA	NA	NA	NA	NA	NA	4.74953	10.9186
TCGA-HT-A5R5	Oligodendroglioma	II	IDHmut-non-codel	0.1	0	NotAltered	TCGA	NA	NA	NA	NA	NA	NA	NA	NA	NA	NA	NA	NA	9.44557	11.2813
TCGA-HT-A5R7	Astrocytoma	III	IDHmut-non-codel	20.2	0	NotAltered	TCGA	NA	NA	NA	NA	NA	NA	NA	NA	NA	NA	NA	NA	4.77137	11.4317
TCGA-HT-A5R9	Oligodendroglioma	III	IDHmut-codel	0.1	0	NotAltered	TCGA	NA	NA	NA	NA	NA	NA	NA	NA	NA	NA	NA	NA	2.32409	11.9158
TCGA-HT-A5RA	Astrocytoma	III	IDHwt	27.4	0	NotAltered	TCGA	2363.01	2247.32	7495.05	2461.16	-1363.48	1	0.001998	0.000999001	0.507493	1	CL	INJ	7.53507	11.2845
TCGA-HT-A5RB	Astrocytoma	II	IDHmut-non-codel	0.1	0	NotAltered	TCGA	NA	NA	NA	NA	NA	NA	NA	NA	NA	NA	NA	NA	1.94699	11.86
TCGA-HT-A5RC	Astrocytoma	III	IDHwt	5.3	1	NotAltered	TCGA	2633.85	2077	7943.76	1389.33	-833.57	0.003996	0.966034	0.000999001	0.998002	0.999001	CL	DEV	7.28145	11.3897
TCGA-HT-A614	Oligoastrocytoma	II	IDHmut-non-codel	2.7	0	NotAltered	TCGA	NA	NA	NA	NA	NA	NA	NA	NA	NA	NA	NA	NA	2.42691	11.4203
TCGA-HT-A615	Oligodendroglioma	II	IDHmut-codel	16.9	0	NotAltered	TCGA	NA	NA	NA	NA	NA	NA	NA	NA	NA	NA	NA	NA	1.39028	11.4704
TCGA-HT-A616	Astrocytoma	II	IDHmut-non-codel	1.8	0	NotAltered	TCGA	NA	NA	NA	NA	NA	NA	NA	NA	NA	NA	NA	NA	6.54449	11.3065
TCGA-HT-A617	Oligodendroglioma	II	IDHwt	16.1	0	Altered	TCGA	2763.96	2041.32	7636.95	2169.75	-59.0173	0.000999001	1	0.000999001	0.763237	0.843157	CL	DEV	7.02619	9.28439
TCGA-HT-A618	Astrocytoma	III	IDHmut-non-codel	16.8	0	NotAltered	TCGA	NA	NA	NA	NA	NA	NA	NA	NA	NA	NA	NA	NA	6.15439	11.3899
TCGA-HT-A619	Oligodendroglioma	III	IDHmut-codel	21.4	0	NotAltered	TCGA	NA	NA	NA	NA	NA	NA	NA	NA	NA	NA	NA	NA	3.32302	11.9185
TCGA-HT-A61A	Oligodendroglioma	II	IDHmut-non-codel	6.4	0	NA	TCGA	NA	NA	NA	NA	NA	NA	NA	NA	NA	NA	NA	NA	1.28451	11.363
TCGA-HT-A61B	Astrocytoma	III	IDHmut-non-codel	17.5	0	NotAltered	TCGA	NA	NA	NA	NA	NA	NA	NA	NA	NA	NA	NA	NA	5.54477	11.4067
TCGA-HT-A61C	Oligodendroglioma	III	IDHwt	17.7	1	NotAltered	TCGA	2796.09	1824.35	5392.51	2801.65	2158.94	0.000999001	1	1	0.192807	0.000999001	PN	DEV	7.7997	10.3397
TCGA-HT-A74H	Astrocytoma	III	IDHwt	2.4	0	NotAltered	TCGA	2681.87	1962.68	6522.89	586.929	685.636	0.001998	1	0.705295	1	0.236763	PN	DEV	3.86374	10.628
TCGA-HT-A74J	Oligoastrocytoma	II	IDHmut-non-codel	10.5	0	NotAltered	TCGA	NA	NA	NA	NA	NA	NA	NA	NA	NA	NA	NA	NA	4.77232	11.2486
TCGA-HT-A74K	Oligodendroglioma	III	IDHmut-codel	15.4	0	NotAltered	TCGA	NA	NA	NA	NA	NA	NA	NA	NA	NA	NA	NA	NA	5.11846	10.1486
TCGA-HT-A74L	Oligoastrocytoma	II	IDHmut-codel	11	0	NotAltered	TCGA	NA	NA	NA	NA	NA	NA	NA	NA	NA	NA	NA	NA	5.31319	12.1357
TCGA-HT-A74O	Astrocytoma	III	IDHmut-non-codel	0.1	0	NotAltered	TCGA	NA	NA	NA	NA	NA	NA	NA	NA	NA	NA	NA	NA	5.37831	10.7082
TCGA-HW-7486	Oligodendroglioma	II	IDHmut-codel	56.6	0	NotAltered	TCGA	NA	NA	NA	NA	NA	NA	NA	NA	NA	NA	NA	NA	2.92738	11.9238
TCGA-HW-7487	Oligodendroglioma	II	IDHmut-codel	45.4	0	NotAltered	TCGA	NA	NA	NA	NA	NA	NA	NA	NA	NA	NA	NA	NA	0.891186	11.8742
TCGA-HW-7489	Oligoastrocytoma	II	IDHmut-non-codel	41.5	1	NotAltered	TCGA	NA	NA	NA	NA	NA	NA	NA	NA	NA	NA	NA	NA	3.25595	11.4123
TCGA-HW-7490	Astrocytoma	II	IDHmut-non-codel	45.6	0	NotAltered	TCGA	NA	NA	NA	NA	NA	NA	NA	NA	NA	NA	NA	NA	4.90816	11.5923
TCGA-HW-7491	Oligodendroglioma	II	IDHmut-codel	68.3	0	NotAltered	TCGA	NA	NA	NA	NA	NA	NA	NA	NA	NA	NA	NA	NA	2.18894	12.7766
TCGA-HW-7493	Astrocytoma	II	NA	69.3	0	NA	TCGA	NA	NA	NA	NA	NA	NA	NA	NA	NA	NA	NA	NA	4.13953	12.3849
TCGA-HW-7495	Oligodendroglioma	II	IDHmut-codel	35.4	0	NotAltered	TCGA	NA	NA	NA	NA	NA	NA	NA	NA	NA	NA	NA	NA	5.66586	12.0747
TCGA-HW-8319	Astrocytoma	III	IDHmut-non-codel	39.7	1	NotAltered	TCGA	NA	NA	NA	NA	NA	NA	NA	NA	NA	NA	NA	NA	6.09261	12.172
TCGA-HW-8320	Astrocytoma	III	IDHmut-non-codel	40	0	NotAltered	TCGA	NA	NA	NA	NA	NA	NA	NA	NA	NA	NA	NA	NA	3.99066	11.9951
TCGA-HW-8321	Astrocytoma	III	IDHmut-non-codel	42.5	0	NotAltered	TCGA	NA	NA	NA	NA	NA	NA	NA	NA	NA	NA	NA	NA	5.99122	12.0096
TCGA-HW-8322	Oligodendroglioma	II	IDHmut-codel	24.9	0	NotAltered	TCGA	NA	NA	NA	NA	NA	NA	NA	NA	NA	NA	NA	NA	4.44759	12.0767
TCGA-HW-A5KJ	Oligodendroglioma	III	IDHmut-codel	31.6	1	NotAltered	TCGA	NA	NA	NA	NA	NA	NA	NA	NA	NA	NA	NA	NA	6.34086	11.2067
TCGA-HW-A5KK	Astrocytoma	III	IDHwt	12.8	1	NotAltered	TCGA	2685.62	2123.78	6957.54	597.803	868.743	0.001998	0.654346	0.0939061	1	0.128871	CL	DEV	6.69637	10.9753
TCGA-HW-A5KL	Astrocytoma	II	IDHmut-non-codel	28.9	0	NotAltered	TCGA	NA	NA	NA	NA	NA	NA	NA	NA	NA	NA	NA	NA	2.71771	11.7359
TCGA-HW-A5KM	Astrocytoma	II	IDHmut-non-codel	20.7	0	NotAltered	TCGA	NA	NA	NA	NA	NA	NA	NA	NA	NA	NA	NA	NA	4.84623	11.8377
TCGA-IK-7675	Oligodendroglioma	II	IDHmut-non-codel	19	1	Altered	TCGA	NA	NA	NA	NA	NA	NA	NA	NA	NA	NA	NA	NA	2.90394	12.2146
TCGA-IK-8125	Oligoastrocytoma	III	IDHmut-codel	42.8	0	NotAltered	TCGA	NA	NA	NA	NA	NA	NA	NA	NA	NA	NA	NA	NA	3.87761	12.2773
TCGA-KT-A74X	Oligoastrocytoma	III	IDHmut-codel	14.4	0	NotAltered	TCGA	NA	NA	NA	NA	NA	NA	NA	NA	NA	NA	NA	NA	4.63771	11.7361
TCGA-KT-A7W1	Astrocytoma	III	IDHwt	14.4	0	NotAltered	TCGA	2832.61	1806.18	7989.96	549.996	-405.071	0.000999001	1	0.000999001	1	0.979021	CL	DEV	7.78339	11.1529
TCGA-P5-A5ET	Oligodendroglioma	II	IDHmut-codel	0	0	NotAltered	TCGA	NA	NA	NA	NA	NA	NA	NA	NA	NA	NA	NA	NA	1.70788	11.2657
TCGA-P5-A5EU	Astrocytoma	III	IDHmut-non-codel	0	0	NotAltered	TCGA	NA	NA	NA	NA	NA	NA	NA	NA	NA	NA	NA	NA	6.50614	11.555
TCGA-P5-A5EV	Astrocytoma	II	IDHmut-non-codel	0.2	0	Altered	TCGA	NA	NA	NA	NA	NA	NA	NA	NA	NA	NA	NA	NA	3.28678	10.4175
TCGA-P5-A5EW	Astrocytoma	II	IDHmut-non-codel	6.7	0	NotAltered	TCGA	NA	NA	NA	NA	NA	NA	NA	NA	NA	NA	NA	NA	4.46125	12.0172
TCGA-P5-A5EX	Oligodendroglioma	III	IDHmut-codel	8	0	NotAltered	TCGA	NA	NA	NA	NA	NA	NA	NA	NA	NA	NA	NA	NA	6.69355	11.4223
TCGA-P5-A5EY	Astrocytoma	II	IDHwt	2.4	0	NotAltered	TCGA	3132.58	1793.28	7383.47	-716.472	1395.99	0.000999001	1	0.001998	1	0.00699301	CL	DEV	4.45474	11.5942
TCGA-P5-A5EZ	Astrocytoma	III	IDHmut-non-codel	2.3	0	Altered	TCGA	NA	NA	NA	NA	NA	NA	NA	NA	NA	NA	NA	NA	4.05646	11.3136
TCGA-P5-A5F0	Oligodendroglioma	II	IDHmut-codel	9.4	0	NotAltered	TCGA	NA	NA	NA	NA	NA	NA	NA	NA	NA	NA	NA	NA	2.19093	11.8028
TCGA-P5-A5F1	Astrocytoma	II	IDHmut-non-codel	5.9	0	NotAltered	TCGA	NA	NA	NA	NA	NA	NA	NA	NA	NA	NA	NA	NA	4.03273	11.3076
TCGA-P5-A5F2	Astrocytoma	II	IDHmut-non-codel	8	0	NotAltered	TCGA	NA	NA	NA	NA	NA	NA	NA	NA	NA	NA	NA	NA	6.04194	11.5418
TCGA-P5-A5F4	Oligodendroglioma	III	IDHmut-non-codel	7.6	0	NotAltered	TCGA	NA	NA	NA	NA	NA	NA	NA	NA	NA	NA	NA	NA	2.68194	11.2552
TCGA-P5-A5F6	Oligodendroglioma	II	IDHwt	1.3	0	Altered	TCGA	1275.14	2744.75	4743.21	2999.93	-361.976	1	0.000999001	1	0.0969031	0.969031	MES	INJ	5.15073	10.406
TCGA-P5-A72U	Oligodendroglioma	III	IDHwt	0.2	0	NotAltered	TCGA	2391.7	2326.28	7961.16	2701.26	-1457.57	1	0.000999001	0.000999001	0.251748	1	CL	INJ	6.18143	10.7979
TCGA-P5-A72W	Astrocytoma	III	IDHmut-non-codel	10.4	0	NotAltered	TCGA	NA	NA	NA	NA	NA	NA	NA	NA	NA	NA	NA	NA	5.37548	10.5025
TCGA-P5-A72X	Astrocytoma	III	IDHmut-non-codel	13.2	0	NotAltered	TCGA	NA	NA	NA	NA	NA	NA	NA	NA	NA	NA	NA	NA	4.53169	11.4326
TCGA-P5-A72Z	Oligodendroglioma	III	IDHmut-codel	11.6	0	NotAltered	TCGA	NA	NA	NA	NA	NA	NA	NA	NA	NA	NA	NA	NA	2.66732	11.7223
TCGA-P5-A730	Oligoastrocytoma	III	IDHmut-codel	10.9	0	NotAltered	TCGA	NA	NA	NA	NA	NA	NA	NA	NA	NA	NA	NA	NA	5.38715	11.7659
TCGA-P5-A731	Oligoastrocytoma	II	IDHmut-non-codel	9	0	NotAltered	TCGA	NA	NA	NA	NA	NA	NA	NA	NA	NA	NA	NA	NA	5.39487	11.3676
TCGA-P5-A733	Astrocytoma	II	IDHmut-non-codel	13.6	0	NotAltered	TCGA	NA	NA	NA	NA	NA	NA	NA	NA	NA	NA	NA	NA	3.96295	11.533
TCGA-P5-A735	Astrocytoma	II	IDHmut-non-codel	9.6	0	NotAltered	TCGA	NA	NA	NA	NA	NA	NA	NA	NA	NA	NA	NA	NA	3.09469	11.2091
TCGA-P5-A736	Astrocytoma	III	IDHmut-non-codel	7.6	0	NotAltered	TCGA	NA	NA	NA	NA	NA	NA	NA	NA	NA	NA	NA	NA	5.41217	10.9537
TCGA-P5-A737	Oligoastrocytoma	II	IDHmut-codel	12.2	0	NotAltered	TCGA	NA	NA	NA	NA	NA	NA	NA	NA	NA	NA	NA	NA	3.37356	11.7921
TCGA-P5-A77W	Oligoastrocytoma	III	IDHmut-codel	19.2	0	NotAltered	TCGA	NA	NA	NA	NA	NA	NA	NA	NA	NA	NA	NA	NA	4.54052	12.058
TCGA-P5-A77X	Oligoastrocytoma	II	IDHmut-codel	3.5	0	NotAltered	TCGA	NA	NA	NA	NA	NA	NA	NA	NA	NA	NA	NA	NA	2.97126	11.8343
TCGA-P5-A780	Astrocytoma	III	IDHmut-non-codel	2.4	0	NotAltered	TCGA	NA	NA	NA	NA	NA	NA	NA	NA	NA	NA	NA	NA	5.49174	11.5359
TCGA-P5-A781	Astrocytoma	III	IDHmut-codel	4.4	0	NotAltered	TCGA	NA	NA	NA	NA	NA	NA	NA	NA	NA	NA	NA	NA	2.96225	11.8369
TCGA-QH-A65R	Oligodendroglioma	III	IDHmut-codel	15.2	0	NotAltered	TCGA	NA	NA	NA	NA	NA	NA	NA	NA	NA	NA	NA	NA	6.92554	11.2204
TCGA-QH-A65S	Oligoastrocytoma	II	IDHmut-non-codel	2.5	0	NotAltered	TCGA	NA	NA	NA	NA	NA	NA	NA	NA	NA	NA	NA	NA	3.73897	11.2638
TCGA-QH-A65V	Oligodendroglioma	II	IDHmut-codel	12.6	0	NotAltered	TCGA	NA	NA	NA	NA	NA	NA	NA	NA	NA	NA	NA	NA	4.73623	11.3658
TCGA-QH-A65X	Oligoastrocytoma	III	IDHmut-codel	15.8	0	NotAltered	TCGA	NA	NA	NA	NA	NA	NA	NA	NA	NA	NA	NA	NA	6.56044	10.2755
TCGA-QH-A65Z	Oligodendroglioma	II	IDHmut-codel	14	0	NotAltered	TCGA	NA	NA	NA	NA	NA	NA	NA	NA	NA	NA	NA	NA	3.85719	11.7642
TCGA-QH-A6CS	Astrocytoma	III	IDHwt	19.3	0	Altered	TCGA	2638.36	1990.54	7370.35	256.392	-280.883	0.001998	1	0.001998	1	0.951049	CL	DEV	4.45402	9.79409
TCGA-QH-A6CU	Oligodendroglioma	III	IDHmut-codel	14.8	0	NotAltered	TCGA	NA	NA	NA	NA	NA	NA	NA	NA	NA	NA	NA	NA	3.31617	11.2114
TCGA-QH-A6CV	Oligoastrocytoma	III	IDHwt	14.5	0	NotAltered	TCGA	2743.95	1659.47	7786.84	1237.57	-239.725	0.000999001	1	0.000999001	0.999001	0.934066	CL	DEV	5.73815	10.1985
TCGA-QH-A6CW	Oligoastrocytoma	III	IDHmut-non-codel	13.6	0	NotAltered	TCGA	NA	NA	NA	NA	NA	NA	NA	NA	NA	NA	NA	NA	7.92354	11.4403
TCGA-QH-A6CX	Astrocytoma	II	IDHwt	12.2	1	Altered	TCGA	2464.27	2149.14	7270.86	779.467	-359.603	0.966034	0.340659	0.001998	1	0.968032	CL	INJ	5.80438	10.7554
TCGA-QH-A6CY	Oligoastrocytoma	III	IDHmut-codel	13.4	0	NotAltered	TCGA	NA	NA	NA	NA	NA	NA	NA	NA	NA	NA	NA	NA	2.92359	11.7658
TCGA-QH-A6CZ	Oligoastrocytoma	II	IDHmut-codel	9.2	0	NotAltered	TCGA	NA	NA	NA	NA	NA	NA	NA	NA	NA	NA	NA	NA	3.33136	12.0154
TCGA-QH-A6X3	Oligoastrocytoma	II	IDHmut-non-codel	10.3	0	NotAltered	TCGA	NA	NA	NA	NA	NA	NA	NA	NA	NA	NA	NA	NA	5.14966	11.8919
TCGA-QH-A6X4	Oligoastrocytoma	III	IDHmut-codel	14.5	0	NotAltered	TCGA	NA	NA	NA	NA	NA	NA	NA	NA	NA	NA	NA	NA	1.4862	11.3553
TCGA-QH-A6X5	Oligoastrocytoma	II	IDHmut-codel	16.3	0	NotAltered	TCGA	NA	NA	NA	NA	NA	NA	NA	NA	NA	NA	NA	NA	4.79671	11.5092
TCGA-QH-A6X8	Oligodendroglioma	III	IDHmut-codel	16.7	0	NotAltered	TCGA	NA	NA	NA	NA	NA	NA	NA	NA	NA	NA	NA	NA	2.39624	11.7829
TCGA-QH-A6X9	Oligodendroglioma	II	IDHmut-non-codel	1.9	0	NotAltered	TCGA	NA	NA	NA	NA	NA	NA	NA	NA	NA	NA	NA	NA	2.60036	11.9254
TCGA-QH-A6XA	Oligoastrocytoma	II	IDHmut-non-codel	16.5	0	NotAltered	TCGA	NA	NA	NA	NA	NA	NA	NA	NA	NA	NA	NA	NA	3.79379	11.4814
TCGA-QH-A6XC	Astrocytoma	III	IDHwt	16.7	0	NotAltered	TCGA	3218.79	1552.46	7760.99	-359.904	775.773	0.000999001	1	0.000999001	1	0.182817	CL	DEV	6.54343	10.2818
TCGA-QH-A86X	Oligodendroglioma	II	IDHmut-codel	11.1	0	NotAltered	TCGA	NA	NA	NA	NA	NA	NA	NA	NA	NA	NA	NA	NA	1.58154	11.8171
TCGA-QH-A870	Oligoastrocytoma	III	IDHmut-non-codel	13	0	NotAltered	TCGA	NA	NA	NA	NA	NA	NA	NA	NA	NA	NA	NA	NA	2.73712	11.9923
TCGA-R8-A6MK	Oligodendroglioma	II	IDHmut-codel	88.8	0	NotAltered	TCGA	NA	NA	NA	NA	NA	NA	NA	NA	NA	NA	NA	NA	4.00563	12.0178
TCGA-R8-A6ML	Oligodendroglioma	III	IDHmut-codel	94	0	NotAltered	TCGA	NA	NA	NA	NA	NA	NA	NA	NA	NA	NA	NA	NA	5.11716	11.9189
TCGA-R8-A6MO	Oligodendroglioma	II	IDHmut-codel	32.6	0	NotAltered	TCGA	NA	NA	NA	NA	NA	NA	NA	NA	NA	NA	NA	NA	5.37125	11.3818
TCGA-R8-A6YH	NA	NA	IDHmut-non-codel	NA	NA	NotAltered	TCGA	NA	NA	NA	NA	NA	NA	NA	NA	NA	NA	NA	NA	6.65888	11.1315
TCGA-R8-A73M	Oligodendroglioma	II	IDHmut-codel	59.4	0	NotAltered	TCGA	NA	NA	NA	NA	NA	NA	NA	NA	NA	NA	NA	NA	1.68787	10.6254
TCGA-RY-A83X	Oligodendroglioma	II	IDHmut-codel	30.9	0	NotAltered	TCGA	NA	NA	NA	NA	NA	NA	NA	NA	NA	NA	NA	NA	2.4578	11.7506
TCGA-RY-A83Y	Oligodendroglioma	II	IDHmut-codel	5.5	0	NotAltered	TCGA	NA	NA	NA	NA	NA	NA	NA	NA	NA	NA	NA	NA	4.75749	11.1252
TCGA-RY-A83Z	Astrocytoma	III	IDHmut-non-codel	9.9	0	NotAltered	TCGA	NA	NA	NA	NA	NA	NA	NA	NA	NA	NA	NA	NA	4.52869	10.8814
TCGA-RY-A840	Oligodendroglioma	III	IDHmut-codel	28.1	0	NotAltered	TCGA	NA	NA	NA	NA	NA	NA	NA	NA	NA	NA	NA	NA	0.416948	10.9945
TCGA-RY-A843	Astrocytoma	III	IDHmut-non-codel	2.1	0	NotAltered	TCGA	NA	NA	NA	NA	NA	NA	NA	NA	NA	NA	NA	NA	6.81059	11.676
TCGA-RY-A845	Oligoastrocytoma	II	IDHmut-non-codel	19.6	0	NotAltered	TCGA	NA	NA	NA	NA	NA	NA	NA	NA	NA	NA	NA	NA	3.00933	11.5685
TCGA-RY-A847	Oligodendroglioma	II	IDHmut-codel	30.7	0	NotAltered	TCGA	NA	NA	NA	NA	NA	NA	NA	NA	NA	NA	NA	NA	4.16223	11.5402
TCGA-S9-A6TS	Astrocytoma	III	IDHmut-non-codel	62.2	1	NotAltered	TCGA	NA	NA	NA	NA	NA	NA	NA	NA	NA	NA	NA	NA	4.40756	11.2783
TCGA-S9-A6TU	Astrocytoma	II	IDHmut-non-codel	87.1	0	NotAltered	TCGA	NA	NA	NA	NA	NA	NA	NA	NA	NA	NA	NA	NA	4.4157	11.1751
TCGA-S9-A6TV	Oligoastrocytoma	III	IDHmut-non-codel	18.8	0	NotAltered	TCGA	NA	NA	NA	NA	NA	NA	NA	NA	NA	NA	NA	NA	7.48236	11.273
TCGA-S9-A6TW	Oligodendroglioma	III	IDHmut-codel	41.1	0	NotAltered	TCGA	NA	NA	NA	NA	NA	NA	NA	NA	NA	NA	NA	NA	5.38483	11.0778
TCGA-S9-A6TX	Oligodendroglioma	III	IDHmut-codel	40.9	0	NotAltered	TCGA	NA	NA	NA	NA	NA	NA	NA	NA	NA	NA	NA	NA	4.04239	11.1506
TCGA-S9-A6TY	Oligodendroglioma	II	IDHmut-codel	35.4	0	NotAltered	TCGA	NA	NA	NA	NA	NA	NA	NA	NA	NA	NA	NA	NA	2.05506	11.7081
TCGA-S9-A6TZ	Astrocytoma	II	IDHmut-non-codel	36.8	0	NotAltered	TCGA	NA	NA	NA	NA	NA	NA	NA	NA	NA	NA	NA	NA	3.8132	12.114
TCGA-S9-A6U0	Astrocytoma	III	IDHwt	24.4	1	NotAltered	TCGA	2082.23	2624.65	6793.69	3049.99	224.039	1	0.000999001	0.268731	0.0779221	0.635365	MES	INJ	6.22139	10.451
TCGA-S9-A6U1	Astrocytoma	III	IDHmut-non-codel	25.8	0	NotAltered	TCGA	NA	NA	NA	NA	NA	NA	NA	NA	NA	NA	NA	NA	2.28812	11.8617
TCGA-S9-A6U2	Oligodendroglioma	II	IDHmut-codel	29.9	0	NotAltered	TCGA	NA	NA	NA	NA	NA	NA	NA	NA	NA	NA	NA	NA	3.83032	12.3751
TCGA-S9-A6U5	Astrocytoma	II	IDHmut-codel	32.6	0	NotAltered	TCGA	NA	NA	NA	NA	NA	NA	NA	NA	NA	NA	NA	NA	4.48806	11.7389
TCGA-S9-A6U6	Astrocytoma	III	IDHmut-non-codel	35.1	0	NotAltered	TCGA	NA	NA	NA	NA	NA	NA	NA	NA	NA	NA	NA	NA	5.62766	11.279
TCGA-S9-A6U8	Astrocytoma	II	IDHmut-non-codel	98.2	1	NotAltered	TCGA	NA	NA	NA	NA	NA	NA	NA	NA	NA	NA	NA	NA	2.0251	11.7216
TCGA-S9-A6U9	Astrocytoma	III	IDHmut-non-codel	95.9	0	NotAltered	TCGA	NA	NA	NA	NA	NA	NA	NA	NA	NA	NA	NA	NA	8.69347	11.2601
TCGA-S9-A6UA	Astrocytoma	III	IDHwt	5.9	1	Altered	TCGA	2265.32	2570.87	5421.35	4131.66	2016.56	1	0.000999001	1	0.000999001	0.000999001	NA	INJ	7.35432	9.78979
TCGA-S9-A6UB	Oligodendroglioma	II	IDHmut-codel	123.6	0	NotAltered	TCGA	NA	NA	NA	NA	NA	NA	NA	NA	NA	NA	NA	NA	1.99733	11.8831
TCGA-S9-A6WD	Oligodendroglioma	III	IDHmut-codel	75.3	0	NotAltered	TCGA	NA	NA	NA	NA	NA	NA	NA	NA	NA	NA	NA	NA	2.54567	11.8355
TCGA-S9-A6WE	Oligodendroglioma	II	IDHmut-codel	135.2	0	NotAltered	TCGA	NA	NA	NA	NA	NA	NA	NA	NA	NA	NA	NA	NA	4.65678	11.814
TCGA-S9-A6WG	Astrocytoma	III	IDHmut-non-codel	85.5	0	NotAltered	TCGA	NA	NA	NA	NA	NA	NA	NA	NA	NA	NA	NA	NA	9.04307	10.7312
TCGA-S9-A6WH	Oligoastrocytoma	II	IDHmut-codel	38.6	0	NotAltered	TCGA	NA	NA	NA	NA	NA	NA	NA	NA	NA	NA	NA	NA	2.85148	11.9607
TCGA-S9-A6WI	Oligoastrocytoma	II	IDHmut-non-codel	85	0	NotAltered	TCGA	NA	NA	NA	NA	NA	NA	NA	NA	NA	NA	NA	NA	5.53646	11.1334
TCGA-S9-A6WL	Astrocytoma	III	IDHmut-codel	31.1	0	NotAltered	TCGA	NA	NA	NA	NA	NA	NA	NA	NA	NA	NA	NA	NA	6.0016	11.9746
TCGA-S9-A6WM	Astrocytoma	III	IDHwt	19.9	0	NotAltered	TCGA	2843.91	1758.03	7845.31	1001.51	-993.346	0.000999001	1	0.000999001	1	1	CL	DEV	5.21447	10.8756
TCGA-S9-A6WN	Astrocytoma	III	IDHmut-codel	26.5	0	NotAltered	TCGA	NA	NA	NA	NA	NA	NA	NA	NA	NA	NA	NA	NA	8.28068	12.0412
TCGA-S9-A6WO	Astrocytoma	II	IDHmut-non-codel	18.6	0	NotAltered	TCGA	NA	NA	NA	NA	NA	NA	NA	NA	NA	NA	NA	NA	2.49329	11.7532
TCGA-S9-A6WP	Oligoastrocytoma	III	IDHmut-codel	18.6	0	Altered	TCGA	NA	NA	NA	NA	NA	NA	NA	NA	NA	NA	NA	NA	3.62469	10.2623
TCGA-S9-A6WQ	Oligoastrocytoma	II	IDHmut-non-codel	14.1	0	NotAltered	TCGA	NA	NA	NA	NA	NA	NA	NA	NA	NA	NA	NA	NA	3.61194	11.0428
TCGA-S9-A7IQ	Oligoastrocytoma	II	IDHmut-codel	36.1	0	NotAltered	TCGA	NA	NA	NA	NA	NA	NA	NA	NA	NA	NA	NA	NA	3.11583	11.3881
TCGA-S9-A7IS	Astrocytoma	III	IDHmut-non-codel	7.9	1	NotAltered	TCGA	NA	NA	NA	NA	NA	NA	NA	NA	NA	NA	NA	NA	7.41916	11.5618
TCGA-S9-A7IX	Astrocytoma	III	IDHwt	26.9	1	Altered	TCGA	2946.73	2008.69	7407.49	856.14	426.43	0.000999001	1	0.001998	1	0.425574	CL	DEV	6.07777	11.1826
TCGA-S9-A7IY	Oligoastrocytoma	III	IDHmut-codel	23.5	0	NotAltered	TCGA	NA	NA	NA	NA	NA	NA	NA	NA	NA	NA	NA	NA	4.07642	11.9304
TCGA-S9-A7IZ	Astrocytoma	III	IDHmut-non-codel	20	0	NotAltered	TCGA	NA	NA	NA	NA	NA	NA	NA	NA	NA	NA	NA	NA	4.5568	11.5739
TCGA-S9-A7J0	Oligodendroglioma	III	IDHmut-non-codel	20	0	NotAltered	TCGA	NA	NA	NA	NA	NA	NA	NA	NA	NA	NA	NA	NA	4.14994	11.5565
TCGA-S9-A7J1	Oligodendroglioma	II	IDHmut-codel	8.2	0	NotAltered	TCGA	NA	NA	NA	NA	NA	NA	NA	NA	NA	NA	NA	NA	3.55374	12.0464
TCGA-S9-A7J2	Oligodendroglioma	III	IDHmut-codel	2	0	NotAltered	TCGA	NA	NA	NA	NA	NA	NA	NA	NA	NA	NA	NA	NA	3.90473	12.0564
TCGA-S9-A7J3	Oligodendroglioma	III	IDHmut-codel	20.7	0	NotAltered	TCGA	NA	NA	NA	NA	NA	NA	NA	NA	NA	NA	NA	NA	5.0696	12.1698
TCGA-S9-A7QW	Astrocytoma	III	IDHmut-non-codel	15.1	0	NotAltered	TCGA	NA	NA	NA	NA	NA	NA	NA	NA	NA	NA	NA	NA	2.61148	11.4426
TCGA-S9-A7QX	Astrocytoma	III	IDHmut-non-codel	18.5	0	NotAltered	TCGA	NA	NA	NA	NA	NA	NA	NA	NA	NA	NA	NA	NA	4.43833	11.5295
TCGA-S9-A7QY	Oligoastrocytoma	II	IDHmut-codel	28.4	0	NotAltered	TCGA	NA	NA	NA	NA	NA	NA	NA	NA	NA	NA	NA	NA	2.4671	11.2841
TCGA-S9-A7QZ	Oligodendroglioma	II	IDHmut-codel	27.2	0	NotAltered	TCGA	NA	NA	NA	NA	NA	NA	NA	NA	NA	NA	NA	NA	3.18935	11.6779
TCGA-S9-A7R1	Oligodendroglioma	II	IDHmut-codel	169.8	1	NotAltered	TCGA	NA	NA	NA	NA	NA	NA	NA	NA	NA	NA	NA	NA	5.51248	11.8448
TCGA-S9-A7R2	Astrocytoma	III	IDHwt	10.4	1	NotAltered	TCGA	2636.32	2004.25	6624.1	545.835	586.9	0.002997	1	0.537463	1	0.303696	PN	DEV	3.95735	10.95
TCGA-S9-A7R3	Astrocytoma	II	IDHmut-non-codel	99.1	0	NotAltered	TCGA	NA	NA	NA	NA	NA	NA	NA	NA	NA	NA	NA	NA	4.36668	11.594
TCGA-S9-A7R4	Astrocytoma	III	IDHmut-non-codel	30	0	NotAltered	TCGA	NA	NA	NA	NA	NA	NA	NA	NA	NA	NA	NA	NA	5.1465	11.7411
TCGA-S9-A7R7	Astrocytoma	II	IDHmut-non-codel	98.6	0	NotAltered	TCGA	NA	NA	NA	NA	NA	NA	NA	NA	NA	NA	NA	NA	6.31565	11.5237
TCGA-S9-A7R8	Astrocytoma	III	IDHmut-non-codel	31.6	1	NotAltered	TCGA	NA	NA	NA	NA	NA	NA	NA	NA	NA	NA	NA	NA	4.47951	11.8826
TCGA-S9-A89V	Astrocytoma	III	IDHwt	18.7	0	Altered	TCGA	3328.5	1631.49	6408.52	-101.124	2814.86	0.000999001	1	0.833167	1	0.000999001	PN	DEV	5.32155	10.9836
TCGA-S9-A89Z	Astrocytoma	III	IDHmut-non-codel	20.5	0	NotAltered	TCGA	NA	NA	NA	NA	NA	NA	NA	NA	NA	NA	NA	NA	4.42979	11.1337
TCGA-TM-A7C3	Astrocytoma	III	IDHwt	54.8	1	NotAltered	TCGA	2981.2	1607.59	8094.31	107.02	-977.455	0.000999001	1	0.000999001	1	1	CL	DEV	5.25023	11.4386
TCGA-TM-A7C4	Astrocytoma	II	IDHmut-non-codel	48.3	0	NotAltered	TCGA	NA	NA	NA	NA	NA	NA	NA	NA	NA	NA	NA	NA	3.21087	11.5751
TCGA-TM-A7C5	Oligoastrocytoma	II	IDHmut-codel	49.3	0	NotAltered	TCGA	NA	NA	NA	NA	NA	NA	NA	NA	NA	NA	NA	NA	5.59593	11.967
TCGA-TM-A7CA	Astrocytoma	II	IDHmut-non-codel	34.8	0	NotAltered	TCGA	NA	NA	NA	NA	NA	NA	NA	NA	NA	NA	NA	NA	2.63141	11.6895
TCGA-TM-A7CF	Astrocytoma	II	IDHmut-non-codel	65.4	0	NotAltered	TCGA	NA	NA	NA	NA	NA	NA	NA	NA	NA	NA	NA	NA	3.45788	11.6187
TCGA-TM-A84B	Astrocytoma	III	IDHwt	24.9	1	NotAltered	TCGA	3090.09	1493.97	7928.72	7.86868	554.7	0.000999001	1	0.000999001	1	0.323676	CL	DEV	3.46588	11.5521
TCGA-TM-A84C	Astrocytoma	II	IDHwt	16.2	1	Altered	TCGA	2335.57	2446.73	6684.06	3078.05	-154.885	1	0.000999001	0.450549	0.0679321	0.901099	MES	INJ	8.73633	9.57897
TCGA-TM-A84F	Astrocytoma	III	IDHmut-non-codel	59	0	NotAltered	TCGA	NA	NA	NA	NA	NA	NA	NA	NA	NA	NA	NA	NA	5.39428	10.9752
TCGA-TM-A84G	Oligodendroglioma	III	IDHmut-codel	40.6	0	NotAltered	TCGA	NA	NA	NA	NA	NA	NA	NA	NA	NA	NA	NA	NA	2.33548	12.0398
TCGA-TM-A84H	Oligoastrocytoma	III	IDHmut-non-codel	30.4	0	NotAltered	TCGA	NA	NA	NA	NA	NA	NA	NA	NA	NA	NA	NA	NA	4.00869	11.9348
TCGA-TM-A84I	Astrocytoma	III	IDHmut-non-codel	28.1	0	NotAltered	TCGA	NA	NA	NA	NA	NA	NA	NA	NA	NA	NA	NA	NA	5.32983	11.7489
TCGA-TM-A84J	Oligodendroglioma	III	IDHwt	24.2	0	NotAltered	TCGA	3397.94	1300.99	5029.89	1406.32	3835.32	0.000999001	1	1	0.998002	0.000999001	PN	DEV	5.2338	11.5756
TCGA-TM-A84L	Oligoastrocytoma	II	IDHmut-non-codel	40.8	1	NotAltered	TCGA	NA	NA	NA	NA	NA	NA	NA	NA	NA	NA	NA	NA	3.59289	11.3137
TCGA-TM-A84M	Oligodendroglioma	III	IDHmut-codel	24.8	0	NotAltered	TCGA	NA	NA	NA	NA	NA	NA	NA	NA	NA	NA	NA	NA	3.32422	12.0334
TCGA-TM-A84O	Oligodendroglioma	III	IDHmut-codel	33.2	1	NotAltered	TCGA	NA	NA	NA	NA	NA	NA	NA	NA	NA	NA	NA	NA	5.37642	11.6499
TCGA-TM-A84Q	Astrocytoma	II	IDHmut-non-codel	25.4	0	NotAltered	TCGA	NA	NA	NA	NA	NA	NA	NA	NA	NA	NA	NA	NA	5.58853	11.8059
TCGA-TM-A84R	Oligodendroglioma	II	IDHmut-codel	18.6	0	NotAltered	TCGA	NA	NA	NA	NA	NA	NA	NA	NA	NA	NA	NA	NA	1.53819	11.6786
TCGA-TM-A84S	Oligodendroglioma	III	IDHmut-codel	14.9	0	NotAltered	TCGA	NA	NA	NA	NA	NA	NA	NA	NA	NA	NA	NA	NA	3.2581	11.8283
TCGA-TM-A84T	Oligoastrocytoma	II	IDHmut-non-codel	23.8	0	NotAltered	TCGA	NA	NA	NA	NA	NA	NA	NA	NA	NA	NA	NA	NA	3.48065	11.7677
TCGA-TQ-A7RF	Oligodendroglioma	III	IDHmut-non-codel	21.4	0	NotAltered	TCGA	NA	NA	NA	NA	NA	NA	NA	NA	NA	NA	NA	NA	6.12917	11.5749
TCGA-TQ-A7RG	Oligoastrocytoma	II	IDHmut-codel	19.7	0	NotAltered	TCGA	NA	NA	NA	NA	NA	NA	NA	NA	NA	NA	NA	NA	3.14781	11.9934
TCGA-TQ-A7RH	Oligoastrocytoma	II	IDHmut-non-codel	16	0	NotAltered	TCGA	NA	NA	NA	NA	NA	NA	NA	NA	NA	NA	NA	NA	4.39829	11.6138
TCGA-TQ-A7RI	Oligodendroglioma	II	IDHmut-codel	2	0	NotAltered	TCGA	NA	NA	NA	NA	NA	NA	NA	NA	NA	NA	NA	NA	2.34741	12.0003
TCGA-TQ-A7RJ	Oligoastrocytoma	II	IDHmut-non-codel	40.4	0	Altered	TCGA	NA	NA	NA	NA	NA	NA	NA	NA	NA	NA	NA	NA	3.68233	11.0333
TCGA-TQ-A7RK	Oligoastrocytoma	II	IDHmut-non-codel	44.1	0	NotAltered	TCGA	NA	NA	NA	NA	NA	NA	NA	NA	NA	NA	NA	NA	3.67468	11.3121
TCGA-TQ-A7RM	Oligoastrocytoma	III	IDHmut-non-codel	36.7	0	NotAltered	TCGA	NA	NA	NA	NA	NA	NA	NA	NA	NA	NA	NA	NA	3.152	11.9191
TCGA-TQ-A7RN	Oligodendroglioma	II	IDHmut-codel	33.7	0	NotAltered	TCGA	NA	NA	NA	NA	NA	NA	NA	NA	NA	NA	NA	NA	2.19843	11.8641
TCGA-TQ-A7RO	Oligoastrocytoma	II	IDHmut-codel	31.2	0	NotAltered	TCGA	NA	NA	NA	NA	NA	NA	NA	NA	NA	NA	NA	NA	5.83444	12.3144
TCGA-TQ-A7RP	Oligoastrocytoma	II	IDHwt	30	0	Altered	TCGA	2671.83	2069.98	7487.53	157.311	202.315	0.001998	0.98002	0.000999001	1	0.655345	CL	DEV	5.56601	10.2077
TCGA-TQ-A7RQ	Oligodendroglioma	II	IDHmut-codel	26.1	0	NotAltered	TCGA	NA	NA	NA	NA	NA	NA	NA	NA	NA	NA	NA	NA	2.81562	12.2599
TCGA-TQ-A7RR	Oligoastrocytoma	II	IDHmut-non-codel	25.9	0	NotAltered	TCGA	NA	NA	NA	NA	NA	NA	NA	NA	NA	NA	NA	NA	3.17875	11.5206
TCGA-TQ-A7RS	Oligodendroglioma	II	IDHmut-codel	0	0	NotAltered	TCGA	NA	NA	NA	NA	NA	NA	NA	NA	NA	NA	NA	NA	4.28115	11.8107
TCGA-TQ-A7RU	Oligodendroglioma	II	IDHmut-codel	33.9	0	NotAltered	TCGA	NA	NA	NA	NA	NA	NA	NA	NA	NA	NA	NA	NA	1.95438	11.7867
TCGA-TQ-A7RV	Astrocytoma	II	IDHmut-non-codel	61.4	0	NotAltered	TCGA	NA	NA	NA	NA	NA	NA	NA	NA	NA	NA	NA	NA	2.23281	11.4502
TCGA-TQ-A7RW	Oligodendroglioma	II	IDHmut-non-codel	27	1	NotAltered	TCGA	NA	NA	NA	NA	NA	NA	NA	NA	NA	NA	NA	NA	2.46271	11.952
TCGA-TQ-A8XE	Oligodendroglioma	II	IDHmut-non-codel	31.4	1	NotAltered	TCGA	NA	NA	NA	NA	NA	NA	NA	NA	NA	NA	NA	NA	5.50849	11.4734
TCGA-VM-A8C8	Oligodendroglioma	II	IDHmut-non-codel	45.9	0	NotAltered	TCGA	NA	NA	NA	NA	NA	NA	NA	NA	NA	NA	NA	NA	4.18233	11.1193
TCGA-VM-A8C9	Astrocytoma	II	IDHwt	43.2	0	NotAltered	TCGA	2353.81	2245.33	5344.05	2522.11	1184.92	1	0.001998	1	0.447552	0.027972	PN	INJ	5.91537	10.1933
TCGA-VM-A8CA	Oligodendroglioma	II	IDHmut-non-codel	13.5	0	NotAltered	TCGA	NA	NA	NA	NA	NA	NA	NA	NA	NA	NA	NA	NA	6.62633	11.2265
TCGA-VM-A8CB	Oligodendroglioma	III	IDHmut-codel	0.1	0	NotAltered	TCGA	NA	NA	NA	NA	NA	NA	NA	NA	NA	NA	NA	NA	2.62945	10.9577
TCGA-VM-A8CD	Astrocytoma	III	IDHwt	7.9	1	Altered	TCGA	2605.24	2240.36	7730.63	1296.09	-239.285	0.01998	0.001998	0.000999001	0.998002	0.934066	CL	INJ	9.24606	9.46689
TCGA-VM-A8CE	Oligodendroglioma	II	IDHmut-codel	39.2	0	NotAltered	TCGA	NA	NA	NA	NA	NA	NA	NA	NA	NA	NA	NA	NA	5.39689	11.6763
TCGA-VM-A8CF	Astrocytoma	III	IDHmut-non-codel	20	0	NotAltered	TCGA	NA	NA	NA	NA	NA	NA	NA	NA	NA	NA	NA	NA	5.85554	10.6903
TCGA-VM-A8CH	Astrocytoma	II	IDHmut-non-codel	23.5	0	NotAltered	TCGA	NA	NA	NA	NA	NA	NA	NA	NA	NA	NA	NA	NA	5.29152	11.7332
TCGA-VV-A829	Oligoastrocytoma	III	IDHmut-codel	37.1	0	NotAltered	TCGA	NA	NA	NA	NA	NA	NA	NA	NA	NA	NA	NA	NA	4.68906	12.0854
TCGA-VV-A86M	Astrocytoma	III	IDHmut-non-codel	16	0	NotAltered	TCGA	NA	NA	NA	NA	NA	NA	NA	NA	NA	NA	NA	NA	3.96042	11.4628
TCGA-VW-A7QS	Oligodendroglioma	III	IDHmut-codel	23.2	0	NotAltered	TCGA	NA	NA	NA	NA	NA	NA	NA	NA	NA	NA	NA	NA	5.5704	11.4378
TCGA-VW-A8FI	Astrocytoma	III	IDHwt	8.1	1	NotAltered	TCGA	2951.29	1548.13	7386.61	375.846	668.526	0.000999001	1	0.001998	1	0.252747	CL	DEV	7.55173	10.8697
TCGA-W9-A837	Oligodendroglioma	II	IDHmut-codel	51.1	0	NotAltered	TCGA	NA	NA	NA	NA	NA	NA	NA	NA	NA	NA	NA	NA	1.92566	11.9432
TCGA-WH-A86K	Astrocytoma	II	IDHmut-non-codel	13.3	0	NotAltered	TCGA	NA	NA	NA	NA	NA	NA	NA	NA	NA	NA	NA	NA	4.16413	11.297
TCGA-WY-A858	Astrocytoma	III	IDHmut-non-codel	44	0	NotAltered	TCGA	NA	NA	NA	NA	NA	NA	NA	NA	NA	NA	NA	NA	4.15732	10.8885
TCGA-WY-A859	Astrocytoma	II	IDHmut-non-codel	39.9	0	NotAltered	TCGA	NA	NA	NA	NA	NA	NA	NA	NA	NA	NA	NA	NA	3.56153	11.1206
TCGA-WY-A85A	Astrocytoma	II	IDHmut-non-codel	43.4	0	NotAltered	TCGA	NA	NA	NA	NA	NA	NA	NA	NA	NA	NA	NA	NA	2.65679	11.4548
TCGA-WY-A85B	Astrocytoma	II	IDHmut-non-codel	45.8	0	NotAltered	TCGA	NA	NA	NA	NA	NA	NA	NA	NA	NA	NA	NA	NA	3.59907	11.5537
TCGA-WY-A85C	Astrocytoma	II	IDHmut-non-codel	46.9	0	NotAltered	TCGA	NA	NA	NA	NA	NA	NA	NA	NA	NA	NA	NA	NA	4.46983	12.0802
TCGA-WY-A85D	Oligoastrocytoma	II	IDHmut-non-codel	37.7	0	NotAltered	TCGA	NA	NA	NA	NA	NA	NA	NA	NA	NA	NA	NA	NA	3.6246	11.3438
TCGA-WY-A85E	Oligoastrocytoma	II	IDHmut-non-codel	20.8	0	NotAltered	TCGA	NA	NA	NA	NA	NA	NA	NA	NA	NA	NA	NA	NA	3.56587	11.5362
CGGA_1001	GBM	IV	IDHwt	112.7	0	NA	CGGA	2370.71	4020.84	5298.58	7467.41	869.165	1	0.000999001	0.998002	0.000999001	0.772228	MES	INJ	3.54473	3.84298
CGGA_1002	Anaplastic Astrocytoma	III	IDHwt	10	1	NA	CGGA	3734.52	2082.81	5419.37	155.138	3243.14	0.000999001	1	0.982018	1	0.000999001	PN	DEV	0.970854	2.98185
CGGA_1003	Oligodendroglioma	II	IDHmut-codel	112.7	0	NA	CGGA	NA	NA	NA	NA	NA	NA	NA	NA	NA	NA	NA	NA	-0.415037	3.82477
CGGA_1004	Astrocytoma	II	IDHwt	29.6	1	NA	CGGA	2682.29	3200.26	5996.6	3645.01	-334.101	1	0.000999001	0.603397	0.247752	0.998002	MES	INJ	1.79909	3.41278
CGGA_1005	Astrocytoma	II	IDHmut-non-codel	112.6	0	NA	CGGA	NA	NA	NA	NA	NA	NA	NA	NA	NA	NA	NA	NA	-0.643856	4.66391
CGGA_1006	Anaplastic Astrocytoma	III	IDHwt	8.4	1	NA	CGGA	2583.11	3582.87	6334.19	5097.43	53.2778	1	0.000999001	0.194805	0.000999001	0.988012	MES	INJ	1.91839	2.82579
CGGA_1007	GBM	IV	IDHwt	11.3	1	NA	CGGA	3147.12	3286.6	7218.94	3237.64	614.924	0.801199	0.000999001	0.000999001	0.564436	0.891109	CL	INJ	1.21412	3.80529
CGGA_1008	GBM	IV	IDHwt	10.4	1	NA	CGGA	3387	2791.19	8240.71	2746.68	-1146.46	0.000999001	0.954046	0.000999001	0.866134	1	CL	DEV	2.23266	4.28318
CGGA_1010	Astrocytoma	II	NA	8.1	1	NA	CGGA	NA	NA	NA	NA	NA	NA	NA	NA	NA	NA	NA	NA	-0.494109	4
CGGA_1011	GBM	IV	IDHwt	3.6	1	NA	CGGA	2399.25	3866.79	6082.14	5654.43	32.683	1	0.000999001	0.504496	0.000999001	0.989011	MES	INJ	4.16912	3.06695
CGGA_1012	Oligodendroglioma	II	IDHmut-non-codel	112	0	NA	CGGA	NA	NA	NA	NA	NA	NA	NA	NA	NA	NA	NA	NA	1.22033	2.78031
CGGA_1013	Astrocytoma	II	IDHmut-non-codel	56.7	1	NA	CGGA	NA	NA	NA	NA	NA	NA	NA	NA	NA	NA	NA	NA	-0.0740006	4.08406
CGGA_1014	Astrocytoma	II	IDHwt	8.6	1	NA	CGGA	3846.15	2081	6476.55	117.865	2332.79	0.000999001	1	0.0879121	1	0.02997	PN	DEV	1.83188	2.65992
CGGA_1015	GBM	IV	IDHwt	5.4	1	NA	CGGA	1349.02	4643.66	4572.32	7806.14	-1049.89	1	0.000999001	1	0.000999001	1	MES	INJ	3.65306	2.07724
CGGA_1017	GBM	IV	IDHwt	25.2	1	NA	CGGA	4150.29	2341.69	6280.36	-1460.09	2972.84	0.000999001	1	0.247752	1	0.002997	PN	DEV	-0.556393	3.92505
CGGA_1018	Oligodendroglioma	II	IDHmut-codel	83.1	1	NA	CGGA	NA	NA	NA	NA	NA	NA	NA	NA	NA	NA	NA	NA	-0.217591	3.65076
CGGA_1019	GBM	IV	IDHwt	7	1	NA	CGGA	NA	NA	NA	NA	NA	NA	NA	NA	NA	NA	NA	NA	5.21179	2.28688
CGGA_1020	Astrocytoma	II	IDHmut-non-codel	36.8	1	NA	CGGA	NA	NA	NA	NA	NA	NA	NA	NA	NA	NA	NA	NA	0.545968	4.30597
CGGA_1022	Astrocytoma	II	IDHwt	17	0	NA	CGGA	NA	NA	NA	NA	NA	NA	NA	NA	NA	NA	NA	NA	3.64731	3.98914
CGGA_1023	GBM	IV	IDHwt	22.4	1	NA	CGGA	3884.41	1603.6	6679.64	1645.97	649.9	0.000999001	1	0.026973	0.999001	0.877123	CL	DEV	1.69153	3.81044
CGGA_1024	GBM	IV	IDHwt	101.1	1	NA	CGGA	3266.2	3159.05	6846.75	4039.9	2052.93	0.042957	0.000999001	0.004995	0.0809191	0.0829171	CL	INJ	3.41954	1.94486
CGGA_1026	GBM	IV	IDHwt	51.6	1	NA	CGGA	3193.74	2819.42	7934.3	2644.9	-1022.25	0.414585	0.836164	0.000999001	0.905095	1	CL	DEV	0.575312	3.99548
CGGA_1027	Anaplastic Oligodendrolgioma	III	IDHmut-codel	88.4	0	NA	CGGA	NA	NA	NA	NA	NA	NA	NA	NA	NA	NA	NA	NA	0.748461	4.10266
CGGA_103	Anaplastic Astrocytoma	III	IDHmut-non-codel	39.1	1	NA	CGGA	NA	NA	NA	NA	NA	NA	NA	NA	NA	NA	NA	NA	-0.621488	4.69933
CGGA_1030	Astrocytoma	II	IDHmut-non-codel	107.7	0	NA	CGGA	NA	NA	NA	NA	NA	NA	NA	NA	NA	NA	NA	NA	-0.120294	3.11103
CGGA_1031	Astrocytoma	II	IDHmut-non-codel	80.8	1	NA	CGGA	NA	NA	NA	NA	NA	NA	NA	NA	NA	NA	NA	NA	-0.184425	4.66278
CGGA_1032	Astrocytoma	II	NA	21.1	1	NA	CGGA	NA	NA	NA	NA	NA	NA	NA	NA	NA	NA	NA	NA	0.298658	1.87184
CGGA_1033	Oligoastrocytoma	II	NA	43.5	0	NA	CGGA	NA	NA	NA	NA	NA	NA	NA	NA	NA	NA	NA	NA	0.250962	2.49057
CGGA_1034	Anaplastic Astrocytoma	III	IDHwt	24.8	1	NA	CGGA	3284.24	3161.92	6999.98	2948.58	698.183	0.018981	0.000999001	0.001998	0.772228	0.855145	CL	INJ	2.59216	4.47573
CGGA_1035	GBM	IV	IDHwt	18.6	1	NA	CGGA	1849.21	4572.51	4832.23	8687.07	-849.576	1	0.000999001	1	0.000999001	1	MES	INJ	5.78973	3.75489
CGGA_1036	GBM	IV	IDHwt	26.5	1	NA	CGGA	3044.37	2791.52	3691.7	5044.2	2985.46	1	0.954046	1	0.000999001	0.002997	MES	INJ	3.41684	2.848
CGGA_1037	Astrocytoma	II	NA	25.6	0	NA	CGGA	NA	NA	NA	NA	NA	NA	NA	NA	NA	NA	NA	NA	-0.304006	3.16832
CGGA_1039	GBM	IV	IDHwt	23.9	1	NA	CGGA	3669.88	2146.05	6734.29	1573.82	1066.44	0.000999001	1	0.01998	1	0.66034	CL	DEV	1.97453	4.15866
CGGA_1041	GBM	IV	IDHwt	105.3	0	NA	CGGA	4128.9	2256.36	6577.3	-281.741	3474.31	0.000999001	1	0.0539461	1	0.000999001	PN	DEV	-0.136062	3.94205
CGGA_1045	GBM	IV	IDHwt	11.4	1	NA	CGGA	2150.55	3754.39	6296.1	7010.66	-1406.31	1	0.000999001	0.233766	0.000999001	1	MES	INJ	3.62761	2.25096
CGGA_1046	Astrocytoma	II	NA	93	0	NA	CGGA	NA	NA	NA	NA	NA	NA	NA	NA	NA	NA	NA	NA	-0.321928	4.31904
CGGA_1048	Astrocytoma	II	IDHwt	23.1	0	NA	CGGA	3793.89	2269.26	5992.39	1271.4	2429.51	0.000999001	1	0.607393	1	0.021978	PN	DEV	2.31904	3.46858
CGGA_1049	GBM	IV	IDHwt	26.6	1	NA	CGGA	2395.36	3819.08	6665.06	6832.13	-2052.25	1	0.000999001	0.027972	0.000999001	1	MES	INJ	2.7761	3.61824
CGGA_1050	Oligodendroglioma	II	IDHmut-codel	99.9	0	NA	CGGA	NA	NA	NA	NA	NA	NA	NA	NA	NA	NA	NA	NA	0.0143553	4.67694
CGGA_1051	Astrocytoma	II	NA	27.6	1	NA	CGGA	NA	NA	NA	NA	NA	NA	NA	NA	NA	NA	NA	NA	0.298658	2.9222
CGGA_1052	Oligodendroglioma	II	IDHmut-codel	97.4	0	NA	CGGA	NA	NA	NA	NA	NA	NA	NA	NA	NA	NA	NA	NA	0.137504	3.12598
CGGA_1053	GBM	IV	IDHwt	12.2	1	NA	CGGA	3035.52	3156.19	5553.71	4018.69	3009.47	1	0.000999001	0.952048	0.0879121	0.002997	PN	INJ	2.40599	3.36457
CGGA_1055	Anaplastic Astrocytoma	III	IDHmut-non-codel	53	1	NA	CGGA	NA	NA	NA	NA	NA	NA	NA	NA	NA	NA	NA	NA	0.356144	4.32769
CGGA_1057	Astrocytoma	II	IDHwt	50.9	1	NA	CGGA	2630.64	2927.09	5330.85	3695.27	460.739	1	0.0609391	0.994006	0.21978	0.942058	MES	INJ	1.87184	2.29572
CGGA_1058	Astrocytoma	II	IDHmut-non-codel	32.7	1	NA	CGGA	NA	NA	NA	NA	NA	NA	NA	NA	NA	NA	NA	NA	0.536053	3.75489
CGGA_1059	Astrocytoma	II	IDHmut-non-codel	0.7	1	NA	CGGA	NA	NA	NA	NA	NA	NA	NA	NA	NA	NA	NA	NA	0.0285692	3.9607
CGGA_106	Astrocytoma	II	IDHwt	154.4	0	NA	CGGA	NA	NA	NA	NA	NA	NA	NA	NA	NA	NA	NA	NA	1.65076	2.22342
CGGA_1060	GBM	IV	IDHmut-non-codel	7.5	1	NA	CGGA	NA	NA	NA	NA	NA	NA	NA	NA	NA	NA	NA	NA	0.111031	4.65421
CGGA_1061	Anaplastic Astrocytoma	III	IDHmut-non-codel	17.5	1	NA	CGGA	NA	NA	NA	NA	NA	NA	NA	NA	NA	NA	NA	NA	0.275007	4.90977
CGGA_1063	Astrocytoma	II	NA	NA	NA	NA	CGGA	NA	NA	NA	NA	NA	NA	NA	NA	NA	NA	NA	NA	-0.37707	3.46205
CGGA_1065	Oligodendroglioma	II	IDHmut-codel	99.4	0	NA	CGGA	NA	NA	NA	NA	NA	NA	NA	NA	NA	NA	NA	NA	-0.286304	3.32048
CGGA_1066	Astrocytoma	II	IDHmut-non-codel	23.8	1	NA	CGGA	NA	NA	NA	NA	NA	NA	NA	NA	NA	NA	NA	NA	1.03562	3.80632
CGGA_1068	GBM	IV	IDHmut-non-codel	2.2	1	NA	CGGA	NA	NA	NA	NA	NA	NA	NA	NA	NA	NA	NA	NA	2.19219	4.0027
CGGA_1069	Astrocytoma	II	IDHmut-non-codel	NA	NA	NA	CGGA	NA	NA	NA	NA	NA	NA	NA	NA	NA	NA	NA	NA	4.05137	3.31325
CGGA_107	Anaplastic Astrocytoma	III	IDHwt	70.9	1	NA	CGGA	NA	NA	NA	NA	NA	NA	NA	NA	NA	NA	NA	NA	2.80323	4.0917
CGGA_1070	GBM	IV	IDHwt	10.9	1	NA	CGGA	3448.86	3000.26	7372.74	3678.98	1318.85	0.000999001	0.002997	0.000999001	0.227772	0.463536	CL	DEV	2.34199	3.75916
CGGA_1071	Astrocytoma	II	IDHwt	98.9	0	NA	CGGA	2811.88	3452.05	7150.44	6778.96	-537.674	1	0.000999001	0.000999001	0.000999001	1	NA	INJ	2.20163	3.5435
CGGA_1072	GBM	IV	IDHwt	35.8	1	NA	CGGA	3327.12	2880.16	6843.08	2131.12	1674.44	0.001998	0.342657	0.004995	0.986014	0.225774	CL	DEV	2.36457	2.75916
CGGA_1073	GBM	IV	IDHwt	8.9	1	NA	CGGA	2492.85	3828.18	7075.74	5525.8	-646.728	1	0.000999001	0.000999001	0.000999001	1	NA	INJ	2.24489	3.40599
CGGA_1074	GBM	IV	IDHwt	2.8	1	NA	CGGA	2820.2	3481.06	5867.1	5387.72	815.523	1	0.000999001	0.746254	0.000999001	0.803197	MES	INJ	2.97636	4.25626
CGGA_1075	GBM	IV	IDHwt	13.1	1	NA	CGGA	2594.96	2855.96	5586.01	4548.53	-1003.4	1	0.571429	0.945055	0.00699301	1	MES	INJ	2.79077	2.93357
CGGA_1077	GBM	IV	IDHwt	19.4	1	NA	CGGA	2366.4	3537.57	5842.5	6412.09	-1032.11	1	0.000999001	0.768232	0.000999001	1	MES	INJ	3.29278	2.72028
CGGA_1078	GBM	IV	IDHwt	10.4	1	NA	CGGA	NA	NA	NA	NA	NA	NA	NA	NA	NA	NA	NA	NA	1.32769	3.58015
CGGA_1079	Anaplastic Astrocytoma	III	IDHwt	15.5	1	NA	CGGA	3273.6	2969.02	7510.48	2826.31	385.033	0.026973	0.00899101	0.000999001	0.832168	0.955045	CL	INJ	0.83996	3.43162
CGGA_108	Anaplastic Astrocytoma	III	IDHwt	12	1	NA	CGGA	NA	NA	NA	NA	NA	NA	NA	NA	NA	NA	NA	NA	1.26903	2.91839
CGGA_1081	Anaplastic Astrocytoma	III	IDHwt	7.1	1	NA	CGGA	NA	NA	NA	NA	NA	NA	NA	NA	NA	NA	NA	NA	2.23266	3.6792
CGGA_1082	Astrocytoma	II	IDHmut-non-codel	NA	NA	NA	CGGA	NA	NA	NA	NA	NA	NA	NA	NA	NA	NA	NA	NA	0.799087	3.98003
CGGA_1083	GBM	IV	IDHwt	14.8	1	NA	CGGA	2237.61	3984.96	6111.38	6121.28	-1450.45	1	0.000999001	0.474525	0.000999001	1	MES	INJ	3.01792	3.02326
CGGA_1086	GBM	IV	NA	65	1	NA	CGGA	NA	NA	NA	NA	NA	NA	NA	NA	NA	NA	NA	NA	0.0426443	1.14405
CGGA_1087	Oligodendroglioma	II	IDHmut-codel	23	0	NA	CGGA	NA	NA	NA	NA	NA	NA	NA	NA	NA	NA	NA	NA	-0.888969	3.90111
CGGA_1091	GBM	IV	IDHwt	36.7	1	NA	CGGA	3470.87	2732.98	7033.79	4540.83	1422.88	0.000999001	0.998002	0.000999001	0.00699301	0.385614	CL	DEV	3.81967	4.0268
CGGA_1094	Anaplastic Astrocytoma	III	IDHmut-non-codel	8.3	1	NA	CGGA	NA	NA	NA	NA	NA	NA	NA	NA	NA	NA	NA	NA	0.895303	4.4489
CGGA_1095	NA	NA	IDHmut-non-codel	91.3	1	NA	CGGA	NA	NA	NA	NA	NA	NA	NA	NA	NA	NA	NA	NA	1.41684	4.02237
CGGA_1097	Astrocytoma	II	IDHwt	45.3	1	NA	CGGA	3613.67	2144.06	7048.01	24.4549	412.021	0.000999001	1	0.000999001	1	0.952048	CL	DEV	1.20789	2.95977
CGGA_1099	GBM	IV	IDHwt	4	1	NA	CGGA	NA	NA	NA	NA	NA	NA	NA	NA	NA	NA	NA	NA	0.464668	2.75061
CGGA_1100	Oligodendroglioma	II	NA	96.2	0	NA	CGGA	NA	NA	NA	NA	NA	NA	NA	NA	NA	NA	NA	NA	-0.304006	3.18745
CGGA_1101	Astrocytoma	II	NA	7	1	NA	CGGA	NA	NA	NA	NA	NA	NA	NA	NA	NA	NA	NA	NA	-0.168123	3.70044
CGGA_1103	GBM	IV	IDHmut-non-codel	19.2	1	NA	CGGA	NA	NA	NA	NA	NA	NA	NA	NA	NA	NA	NA	NA	0.485427	4.92695
CGGA_1105	GBM	IV	IDHmut-non-codel	20	1	NA	CGGA	NA	NA	NA	NA	NA	NA	NA	NA	NA	NA	NA	NA	2.20477	3.40599
CGGA_1106	GBM	IV	IDHwt	13.8	1	NA	CGGA	2468.99	3403.99	6166.17	6469.7	-1259.14	1	0.000999001	0.396603	0.000999001	1	MES	INJ	3.76871	3.84298
CGGA_1108	Anaplastic Astrocytoma	III	IDHwt	22.5	1	NA	CGGA	3245.65	3117.26	5944.11	3620.78	1907.69	0.0949051	0.000999001	0.664336	0.263736	0.125874	PN	INJ	2.12102	3.88655
CGGA_1109	GBM	IV	IDHwt	44.3	1	NA	CGGA	3343.7	2892.52	8781.25	1769.17	-2259.64	0.001998	0.228771	0.000999001	0.999001	1	CL	DEV	0.941106	4.32697
CGGA_1111	Anaplastic Astrocytoma	III	IDHmut-non-codel	88.6	1	NA	CGGA	NA	NA	NA	NA	NA	NA	NA	NA	NA	NA	NA	NA	1.28096	2.87578
CGGA_1113	Anaplastic Oligodendrolgioma	III	IDHmut-codel	41.6	1	NA	CGGA	NA	NA	NA	NA	NA	NA	NA	NA	NA	NA	NA	NA	0.0703893	4.25399
CGGA_1114	GBM	IV	IDHwt	15.1	1	NA	CGGA	2093.37	4217.94	5433.93	6593.86	-483.503	1	0.000999001	0.978022	0.000999001	1	MES	INJ	1.56071	2.9279
CGGA_1116	GBM	IV	IDHmut-non-codel	8.2	1	NA	CGGA	NA	NA	NA	NA	NA	NA	NA	NA	NA	NA	NA	NA	0.454176	3.54597
CGGA_1118	Anaplastic Astrocytoma	III	IDHmut-non-codel	13.1	1	NA	CGGA	NA	NA	NA	NA	NA	NA	NA	NA	NA	NA	NA	NA	1.02857	3.91361
CGGA_1119	GBM	IV	IDHmut-codel	13.9	1	NA	CGGA	NA	NA	NA	NA	NA	NA	NA	NA	NA	NA	NA	NA	0.613532	4.48736
CGGA_112	Astrocytoma	II	IDHmut-non-codel	50.4	1	NA	CGGA	NA	NA	NA	NA	NA	NA	NA	NA	NA	NA	NA	NA	0.176323	3.44095
CGGA_1120	Anaplastic Oligoastrocytoma	III	NA	13.9	1	NA	CGGA	NA	NA	NA	NA	NA	NA	NA	NA	NA	NA	NA	NA	-0.810966	2.57289
CGGA_1121	Anaplastic Astrocytoma	III	IDHmut-non-codel	95	0	NA	CGGA	NA	NA	NA	NA	NA	NA	NA	NA	NA	NA	NA	NA	-0.577767	2.70487
CGGA_1124	GBM	IV	IDHwt	15.9	1	NA	CGGA	1885.16	4245.09	4901.27	8122.99	-742.278	1	0.000999001	1	0.000999001	1	MES	INJ	4.93452	2.57773
CGGA_1126	Anaplastic Astrocytoma	III	IDHmut-non-codel	25.8	1	NA	CGGA	NA	NA	NA	NA	NA	NA	NA	NA	NA	NA	NA	NA	0.887525	3.26604
CGGA_1127	Oligodendroglioma	II	NA	86.5	1	NA	CGGA	NA	NA	NA	NA	NA	NA	NA	NA	NA	NA	NA	NA	0.333424	2.5435
CGGA_1129	GBM	IV	IDHmut-non-codel	5.5	1	NA	CGGA	NA	NA	NA	NA	NA	NA	NA	NA	NA	NA	NA	NA	0.748461	4.41549
CGGA_1130	GBM	IV	IDHmut-non-codel	13.2	1	NA	CGGA	NA	NA	NA	NA	NA	NA	NA	NA	NA	NA	NA	NA	1.1177	2.79494
CGGA_1131	Anaplastic Astrocytoma	III	IDHmut-non-codel	94.1	0	NA	CGGA	NA	NA	NA	NA	NA	NA	NA	NA	NA	NA	NA	NA	0.367371	4.1177
CGGA_1132	Anaplastic Oligodendrolgioma	III	IDHmut-codel	94.1	0	NA	CGGA	NA	NA	NA	NA	NA	NA	NA	NA	NA	NA	NA	NA	-0.251539	2.32193
CGGA_1134	GBM	IV	IDHwt	1.9	1	NA	CGGA	2361.78	3784.53	6166.1	7825.43	-616.671	1	0.000999001	0.396603	0.000999001	1	MES	INJ	5.29902	2.02503
CGGA_1135	GBM	IV	IDHwt	40.9	1	NA	CGGA	2901.49	2638.87	7042	3752.27	-1235.66	1	1	0.000999001	0.197802	1	CL	NA	2.47768	2.73769
CGGA_1136	GBM	IV	IDHmut-non-codel	7.8	1	NA	CGGA	NA	NA	NA	NA	NA	NA	NA	NA	NA	NA	NA	NA	1.37295	4.87971
CGGA_1137	Anaplastic Astrocytoma	III	NA	93.6	0	NA	CGGA	NA	NA	NA	NA	NA	NA	NA	NA	NA	NA	NA	NA	-0.358454	3.17153
CGGA_1138	GBM	IV	IDHwt	13.5	1	NA	CGGA	3516.92	1809.34	5142.11	671.474	1077.86	0.000999001	1	1	1	0.653347	PN	DEV	0.286881	3.41414
CGGA_1139	GBM	IV	IDHwt	39.3	1	NA	CGGA	3208.89	2769.88	6531.14	1858.14	168.436	0.273726	0.989011	0.0709291	0.998002	0.975025	CL	DEV	2.94298	2.70266
CGGA_1140	Anaplastic Astrocytoma	III	IDHwt	30.3	1	NA	CGGA	NA	NA	NA	NA	NA	NA	NA	NA	NA	NA	NA	NA	-0.556393	3.10601
CGGA_1141	Anaplastic Astrocytoma	III	IDHwt	14.2	1	NA	CGGA	3635.82	2264.88	5344.5	684.577	2208.36	0.000999001	1	0.994006	1	0.042957	PN	DEV	0.565597	2.30743
CGGA_1142	GBM	IV	IDHwt	33	1	NA	CGGA	3338.84	2057.43	6943.8	1386.54	-180.809	0.001998	1	0.001998	1	0.995005	CL	DEV	1.15056	3.2765
CGGA_1144	Anaplastic Astrocytoma	III	IDHwt	82.4	0	NA	CGGA	3874.66	2131.71	5803.41	-508.131	2958.09	0.000999001	1	0.805195	1	0.003996	PN	DEV	-0.251539	3.26454
CGGA_1145	Anaplastic Astrocytoma	III	IDHwt	7.9	1	NA	CGGA	NA	NA	NA	NA	NA	NA	NA	NA	NA	NA	NA	NA	4.04963	1.852
CGGA_1146	Anaplastic Astrocytoma	III	IDHmut-non-codel	82.1	0	NA	CGGA	NA	NA	NA	NA	NA	NA	NA	NA	NA	NA	NA	NA	1.11103	4.40599
CGGA_1147	Astrocytoma	II	IDHmut-non-codel	92.9	0	NA	CGGA	NA	NA	NA	NA	NA	NA	NA	NA	NA	NA	NA	NA	-0.785875	3.51854
CGGA_1148	Astrocytoma	II	IDHmut-non-codel	19.6	1	NA	CGGA	NA	NA	NA	NA	NA	NA	NA	NA	NA	NA	NA	NA	1.67356	2.91265
CGGA_1152	Astrocytoma	II	IDHwt	92.4	0	NA	CGGA	2898.4	2801.8	4538.03	4298.21	1267.45	1	0.914086	1	0.035964	0.506494	MES	INJ	2.39232	3.15704
CGGA_1154	Anaplastic Astrocytoma	III	IDHmut-non-codel	12.1	1	NA	CGGA	NA	NA	NA	NA	NA	NA	NA	NA	NA	NA	NA	NA	0.485427	3.7148
CGGA_1155	Anaplastic Astrocytoma	III	IDHmut-codel	45.1	1	NA	CGGA	NA	NA	NA	NA	NA	NA	NA	NA	NA	NA	NA	NA	-0.168123	3.18269
CGGA_1156	Astrocytoma	II	IDHmut-non-codel	92.2	0	NA	CGGA	NA	NA	NA	NA	NA	NA	NA	NA	NA	NA	NA	NA	1.10434	2.75489
CGGA_1157	Astrocytoma	II	IDHwt	23.9	1	NA	CGGA	3585.96	2000.83	6237.13	42.6921	449.617	0.000999001	1	0.303696	1	0.944056	CL	DEV	0.356144	2.23879
CGGA_1158	Oligodendroglioma	II	IDHmut-codel	92	0	NA	CGGA	NA	NA	NA	NA	NA	NA	NA	NA	NA	NA	NA	NA	-0.104697	3.58256
CGGA_1159	Astrocytoma	II	IDHmut-non-codel	91.8	0	NA	CGGA	NA	NA	NA	NA	NA	NA	NA	NA	NA	NA	NA	NA	1.73118	2.19219
CGGA_1160	Anaplastic Astrocytoma	III	IDHmut-non-codel	14	1	NA	CGGA	NA	NA	NA	NA	NA	NA	NA	NA	NA	NA	NA	NA	2.86394	3.90593
CGGA_1161	Anaplastic Astrocytoma	III	IDHmut-non-codel	91.8	0	NA	CGGA	NA	NA	NA	NA	NA	NA	NA	NA	NA	NA	NA	NA	-0.184425	2.33056
CGGA_1162	Anaplastic Oligoastrocytoma	III	NA	91.6	0	NA	CGGA	NA	NA	NA	NA	NA	NA	NA	NA	NA	NA	NA	NA	1.08406	3.30597
CGGA_1164	GBM	IV	IDHmut-codel	33.6	1	NA	CGGA	NA	NA	NA	NA	NA	NA	NA	NA	NA	NA	NA	NA	-0.535332	2.76977
CGGA_1169	Anaplastic Astrocytoma	III	IDHmut-non-codel	58	1	NA	CGGA	NA	NA	NA	NA	NA	NA	NA	NA	NA	NA	NA	NA	0.454176	3.62761
CGGA_1170	GBM	IV	IDHmut-non-codel	11.4	1	NA	CGGA	NA	NA	NA	NA	NA	NA	NA	NA	NA	NA	NA	NA	0.389567	4.80941
CGGA_1171	GBM	IV	IDHwt	13.5	1	NA	CGGA	2437.3	3745.55	5666.99	5188.21	-787.04	1	0.000999001	0.914086	0.000999001	1	MES	INJ	2.04264	4.02326
CGGA_1172	GBM	IV	IDHmut-non-codel	90.2	0	NA	CGGA	NA	NA	NA	NA	NA	NA	NA	NA	NA	NA	NA	NA	1.1375	2.78241
CGGA_1175	GBM	IV	IDHmut-non-codel	14.5	1	NA	CGGA	NA	NA	NA	NA	NA	NA	NA	NA	NA	NA	NA	NA	1.67807	4.45154
CGGA_1177	GBM	IV	IDHwt	14.8	1	NA	CGGA	NA	NA	NA	NA	NA	NA	NA	NA	NA	NA	NA	NA	4.11103	2.60407
CGGA_1178	Anaplastic Astrocytoma	III	IDHmut-non-codel	13.9	1	NA	CGGA	NA	NA	NA	NA	NA	NA	NA	NA	NA	NA	NA	NA	0.137504	3.46989
CGGA_1180	GBM	IV	IDHwt	40.3	0	NA	CGGA	2830.76	3089.41	5314.1	5309.29	2037.27	1	0.000999001	0.995005	0.000999001	0.0889111	MES	INJ	3.64155	3.97453
CGGA_1181	Astrocytoma	II	IDHmut-non-codel	10.5	0	NA	CGGA	NA	NA	NA	NA	NA	NA	NA	NA	NA	NA	NA	NA	0.782409	2.70708
CGGA_1183	Anaplastic Astrocytoma	III	IDHwt	13.4	1	NA	CGGA	3337.88	1848	6657.33	913.361	-92.0796	0.001998	1	0.030969	1	0.995005	CL	DEV	1.10434	3.55213
CGGA_1184	Anaplastic Astrocytoma	III	IDHmut-non-codel	5.1	1	NA	CGGA	NA	NA	NA	NA	NA	NA	NA	NA	NA	NA	NA	NA	1.53107	2.40054
CGGA_1185	Anaplastic Astrocytoma	III	IDHwt	24	1	NA	CGGA	NA	NA	NA	NA	NA	NA	NA	NA	NA	NA	NA	NA	2.34483	4.0505
CGGA_1188	GBM	IV	IDHmut-non-codel	8.4	1	NA	CGGA	NA	NA	NA	NA	NA	NA	NA	NA	NA	NA	NA	NA	2.76341	3.55336
CGGA_1189	Anaplastic Oligodendrolgioma	III	IDHmut-codel	88.6	0	NA	CGGA	NA	NA	NA	NA	NA	NA	NA	NA	NA	NA	NA	NA	-0.395929	5.02768
CGGA_1190	Anaplastic Astrocytoma	III	IDHmut-non-codel	88.6	0	NA	CGGA	NA	NA	NA	NA	NA	NA	NA	NA	NA	NA	NA	NA	0.286881	4.97039
CGGA_1191	Anaplastic Oligodendrolgioma	III	IDHmut-codel	88.6	0	NA	CGGA	NA	NA	NA	NA	NA	NA	NA	NA	NA	NA	NA	NA	0.83996	3.52231
CGGA_1192	Astrocytoma	II	IDHmut-non-codel	88.5	0	NA	CGGA	NA	NA	NA	NA	NA	NA	NA	NA	NA	NA	NA	NA	3.72356	3.34341
CGGA_1195	Anaplastic Astrocytoma	III	IDHmut-non-codel	15.6	1	NA	CGGA	NA	NA	NA	NA	NA	NA	NA	NA	NA	NA	NA	NA	0.124328	3.38819
CGGA_1197	GBM	IV	IDHmut-codel	31	1	NA	CGGA	NA	NA	NA	NA	NA	NA	NA	NA	NA	NA	NA	NA	0.831877	4.35755
CGGA_1198	Oligodendroglioma	II	NA	88.1	0	NA	CGGA	NA	NA	NA	NA	NA	NA	NA	NA	NA	NA	NA	NA	-0.168123	2.80529
CGGA_120	GBM	IV	IDHwt	9.5	1	NA	CGGA	NA	NA	NA	NA	NA	NA	NA	NA	NA	NA	NA	NA	1.74416	2.57046
CGGA_1204	Oligodendroglioma	II	IDHmut-codel	87.7	0	NA	CGGA	NA	NA	NA	NA	NA	NA	NA	NA	NA	NA	NA	NA	-0.168123	4.10014
CGGA_1205	Anaplastic Astrocytoma	III	NA	30.5	1	NA	CGGA	NA	NA	NA	NA	NA	NA	NA	NA	NA	NA	NA	NA	-0.785875	2.58736
CGGA_1207	Anaplastic Oligoastrocytoma	III	NA	87.5	0	NA	CGGA	NA	NA	NA	NA	NA	NA	NA	NA	NA	NA	NA	NA	-0.304006	2.75489
CGGA_1208	GBM	IV	IDHwt	5.3	1	NA	CGGA	NA	NA	NA	NA	NA	NA	NA	NA	NA	NA	NA	NA	3.59216	3.73877
CGGA_1211	Oligodendroglioma	II	IDHmut-codel	87.3	0	NA	CGGA	NA	NA	NA	NA	NA	NA	NA	NA	NA	NA	NA	NA	0.863938	3.54597
CGGA_1212	Anaplastic Astrocytoma	III	IDHmut-non-codel	75.4	1	NA	CGGA	NA	NA	NA	NA	NA	NA	NA	NA	NA	NA	NA	NA	-0.268817	3.99458
CGGA_1214	GBM	IV	IDHwt	19.9	1	NA	CGGA	3682.56	2379.06	6853.59	2208.93	1524.53	0.000999001	1	0.004995	0.981019	0.322677	CL	DEV	0.956057	3.5509
CGGA_1215	Anaplastic Astrocytoma	III	IDHmut-non-codel	1	1	NA	CGGA	NA	NA	NA	NA	NA	NA	NA	NA	NA	NA	NA	NA	1.07039	4.6017
CGGA_1216	GBM	IV	IDHwt	10.3	1	NA	CGGA	2785.58	3195.7	6392.31	2651.84	-1470.03	1	0.000999001	0.145854	0.902098	1	CL	INJ	2.3978	3.45286
CGGA_1218	GBM	IV	IDHwt	9.4	1	NA	CGGA	NA	NA	NA	NA	NA	NA	NA	NA	NA	NA	NA	NA	2.25399	3.76129
CGGA_1219	GBM	IV	IDHmut-non-codel	69.7	1	NA	CGGA	NA	NA	NA	NA	NA	NA	NA	NA	NA	NA	NA	NA	0.815575	3.5741
CGGA_1223	Anaplastic Astrocytoma	III	IDHwt	22.4	1	NA	CGGA	3628.87	2074.96	7541.67	855.77	-605.971	0.000999001	1	0.000999001	1	1	CL	DEV	2.06005	3.2032
CGGA_1224	GBM	IV	IDHwt	8.9	1	NA	CGGA	1597.45	4247.48	4979.63	7530.51	-976.852	1	0.000999001	1	0.000999001	1	MES	INJ	3.60763	2.09085
CGGA_1226	Astrocytoma	II	IDHwt	22	1	NonAltered	CGGA	3488.94	2428.47	6369.8	354.836	758.639	0.000999001	1	0.157842	1	0.83017	CL	DEV	1.91839	2.9782
CGGA_1227	GBM	IV	IDHwt	39.4	1	NonAltered	CGGA	NA	NA	NA	NA	NA	NA	NA	NA	NA	NA	NA	NA	0.0143553	4.27798
CGGA_1228	Astrocytoma	II	IDHwt	86.3	0	NA	CGGA	3795.69	2172.05	5834.03	601.409	2368.7	0.000999001	1	0.775225	1	0.026973	PN	DEV	1.61353	3.46205
CGGA_1231	Anaplastic Astrocytoma	III	IDHwt	74.9	1	NonAltered	CGGA	NA	NA	NA	NA	NA	NA	NA	NA	NA	NA	NA	NA	1.852	3.52982
CGGA_1232	Anaplastic Astrocytoma	III	IDHmut-non-codel	68	1	NonAltered	CGGA	NA	NA	NA	NA	NA	NA	NA	NA	NA	NA	NA	NA	1.31034	3.29719
CGGA_1234	GBM	IV	IDHwt	23.2	1	NA	CGGA	2462.21	4006.69	6351	5162.31	557.781	1	0.000999001	0.178821	0.000999001	0.914086	MES	INJ	3.4489	3.66676
CGGA_1235	Anaplastic Oligodendrolgioma	III	IDHmut-non-codel	86	0	NA	CGGA	NA	NA	NA	NA	NA	NA	NA	NA	NA	NA	NA	NA	1.1375	3.58856
CGGA_1236	GBM	IV	IDHwt	6.3	1	NA	CGGA	3655.52	2203.71	5933.84	-429.555	2000.15	0.000999001	1	0.673327	1	0.0989011	PN	DEV	0.641546	3.32769
CGGA_1237	GBM	IV	IDHwt	9.7	1	NonAltered	CGGA	3509.97	2508.86	6879.56	2816.11	2399.72	0.000999001	1	0.004995	0.833167	0.023976	CL	DEV	2.23266	3.74846
CGGA_1238	Astrocytoma	II	IDHwt	85.8	0	NA	CGGA	3518.36	2704.75	6343.28	2232.4	1980.01	0.000999001	1	0.184815	0.977023	0.102897	PN	DEV	2.35614	3.36036
CGGA_1239	Oligodendroglioma	II	IDHmut-codel	85.8	0	NA	CGGA	NA	NA	NA	NA	NA	NA	NA	NA	NA	NA	NA	NA	0.0565835	3.72356
CGGA_1240	GBM	IV	IDHwt	0.6	1	NA	CGGA	1771.77	4417.9	5537.85	8076.52	-1206.88	1	0.000999001	0.957043	0.000999001	1	MES	INJ	5.5157	3.0018
CGGA_1246	Anaplastic Oligodendrolgioma	III	IDHmut-codel	85	0	NA	CGGA	NA	NA	NA	NA	NA	NA	NA	NA	NA	NA	NA	NA	-0.713119	4.0018
CGGA_1248	GBM	IV	IDHwt	4.5	1	NA	CGGA	NA	NA	NA	NA	NA	NA	NA	NA	NA	NA	NA	NA	1.72247	3.34056
CGGA_1251	GBM	IV	IDHwt	8.9	1	Altered	CGGA	3611.26	2306.2	6028.31	1088.25	3106.7	0.000999001	1	0.568432	1	0.000999001	PN	DEV	0.0285692	2.41954
CGGA_1255	GBM	IV	IDHwt	3.9	1	NonAltered	CGGA	NA	NA	NA	NA	NA	NA	NA	NA	NA	NA	NA	NA	4.55704	4.05918
CGGA_1256	GBM	IV	NA	84.1	0	NonAltered	CGGA	NA	NA	NA	NA	NA	NA	NA	NA	NA	NA	NA	NA	3.07211	2.8339
CGGA_1257	GBM	IV	IDHwt	6.3	1	NonAltered	CGGA	NA	NA	NA	NA	NA	NA	NA	NA	NA	NA	NA	NA	1.14405	3.69711
CGGA_1258	GBM	IV	IDHwt	3.7	1	NA	CGGA	3075.22	3003.91	6352.68	4061.44	2674.83	0.99001	0.001998	0.175824	0.0739261	0.00899101	PN	INJ	1.68706	3.34767
CGGA_1260	GBM	IV	IDHwt	5.8	1	NonAltered	CGGA	NA	NA	NA	NA	NA	NA	NA	NA	NA	NA	NA	NA	3.29425	3.30305
CGGA_1262	GBM	IV	NA	5.5	1	NA	CGGA	NA	NA	NA	NA	NA	NA	NA	NA	NA	NA	NA	NA	0.650765	2.04614
CGGA_1263	Anaplastic Astrocytoma	III	IDHwt	25.4	1	NonAltered	CGGA	3527.95	2165.45	6964.34	271.976	1002.96	0.000999001	1	0.001998	1	0.7003	CL	DEV	1.83592	3.51475
CGGA_1264	Anaplastic Oligodendrolgioma	III	IDHmut-codel	83.5	0	NA	CGGA	NA	NA	NA	NA	NA	NA	NA	NA	NA	NA	NA	NA	0.137504	3.41819
CGGA_1269	Anaplastic Oligodendrolgioma	III	IDHmut-codel	83.3	0	NA	CGGA	NA	NA	NA	NA	NA	NA	NA	NA	NA	NA	NA	NA	0.298658	4.0036
CGGA_1270	GBM	IV	IDHwt	6.2	1	NA	CGGA	2738.13	3384.94	5333.83	5902.56	1985.83	1	0.000999001	0.994006	0.000999001	0.102897	MES	INJ	2.99639	2.7866
CGGA_1271	GBM	IV	IDHwt	17.2	1	NA	CGGA	NA	NA	NA	NA	NA	NA	NA	NA	NA	NA	NA	NA	1.81558	2.53356
CGGA_1272	GBM	IV	IDHmut-non-codel	4.1	1	NA	CGGA	NA	NA	NA	NA	NA	NA	NA	NA	NA	NA	NA	NA	1.15056	4.50398
CGGA_1273	Anaplastic Astrocytoma	III	IDHmut-non-codel	80.2	0	NA	CGGA	NA	NA	NA	NA	NA	NA	NA	NA	NA	NA	NA	NA	0.713696	3.29572
CGGA_1275	GBM	IV	IDHwt	6	1	NA	CGGA	1890.62	3586	4376.3	5008.08	884.807	1	0.000999001	1	0.000999001	0.765235	MES	INJ	5.50494	1.852
CGGA_1280	Anaplastic Astrocytoma	III	IDHwt	14.7	1	NA	CGGA	3584.62	2593.16	7561.37	419.513	112.066	0.000999001	1	0.000999001	1	0.984016	CL	DEV	-0.184425	4.05658
CGGA_1281	Anaplastic Astrocytoma	III	NA	82.9	0	NA	CGGA	NA	NA	NA	NA	NA	NA	NA	NA	NA	NA	NA	NA	-0.0439433	3.75168
CGGA_1282	GBM	IV	IDHwt	36.7	1	NonAltered	CGGA	3273.17	2144.25	7631.26	891.752	-1129.85	0.026973	1	0.000999001	1	1	CL	DEV	0.687061	3.9644
CGGA_1283	GBM	IV	IDHwt	0.7	1	NA	CGGA	NA	NA	NA	NA	NA	NA	NA	NA	NA	NA	NA	NA	0.0976108	3.46336
CGGA_1284	Anaplastic Astrocytoma	III	IDHwt	3.2	1	NA	CGGA	2181.46	4136.99	6215.52	6661.79	-580.839	1	0.000999001	0.335664	0.000999001	1	MES	INJ	3.66221	3.45154
CGGA_1285	GBM	IV	IDHwt	2.6	1	NA	CGGA	NA	NA	NA	NA	NA	NA	NA	NA	NA	NA	NA	NA	3.6241	3.26303
CGGA_1286	Oligodendroglioma	II	IDHmut-codel	82.8	0	NA	CGGA	NA	NA	NA	NA	NA	NA	NA	NA	NA	NA	NA	NA	-0.304006	2.98003
CGGA_1287	GBM	IV	IDHmut-non-codel	17.5	1	NonAltered	CGGA	NA	NA	NA	NA	NA	NA	NA	NA	NA	NA	NA	NA	0.226509	4.16912
CGGA_1291	Anaplastic Oligodendrolgioma	III	NA	79.6	0	NA	CGGA	NA	NA	NA	NA	NA	NA	NA	NA	NA	NA	NA	NA	-0.736966	3.41684
CGGA_1292	Anaplastic Astrocytoma	III	IDHwt	82.6	0	NA	CGGA	3919.95	2454.87	5692.95	502.732	3527.01	0.000999001	1	0.898102	1	0.000999001	PN	DEV	-0.168123	4.01436
CGGA_1295	Anaplastic Astrocytoma	III	IDHmut-non-codel	10.2	1	NonAltered	CGGA	NA	NA	NA	NA	NA	NA	NA	NA	NA	NA	NA	NA	1.33342	3.14241
CGGA_1299	GBM	IV	IDHwt	18.1	1	NA	CGGA	3069.61	3070.69	6962.59	4680.39	451.127	0.996004	0.000999001	0.001998	0.004995	0.944056	CL	INJ	2.4957	3.19061
CGGA_1300	Anaplastic Astrocytoma	III	IDHmut-non-codel	58.9	1	NA	CGGA	NA	NA	NA	NA	NA	NA	NA	NA	NA	NA	NA	NA	0.956057	3.79701
CGGA_1301	GBM	IV	IDHwt	7.9	1	NA	CGGA	NA	NA	NA	NA	NA	NA	NA	NA	NA	NA	NA	NA	1.58496	3.58015
CGGA_1303	Anaplastic Oligoastrocytoma	III	NA	81.3	0	NonAltered	CGGA	NA	NA	NA	NA	NA	NA	NA	NA	NA	NA	NA	NA	-0.643856	3.11103
CGGA_1305	Anaplastic Astrocytoma	III	IDHmut-non-codel	82	0	NonAltered	CGGA	NA	NA	NA	NA	NA	NA	NA	NA	NA	NA	NA	NA	1.21412	3.75489
CGGA_1307	Anaplastic Astrocytoma	III	IDHmut-non-codel	31.7	0	NonAltered	CGGA	NA	NA	NA	NA	NA	NA	NA	NA	NA	NA	NA	NA	1.05658	4.19298
CGGA_1309	Anaplastic Oligodendrolgioma	III	NA	31.7	0	NA	CGGA	NA	NA	NA	NA	NA	NA	NA	NA	NA	NA	NA	NA	-0.152003	2.11437
CGGA_1311	Anaplastic Oligodendrolgioma	III	IDHmut-codel	35.5	1	NA	CGGA	NA	NA	NA	NA	NA	NA	NA	NA	NA	NA	NA	NA	0.0565835	4.02857
CGGA_1313	GBM	IV	IDHwt	12.5	1	NA	CGGA	2667.59	3796.42	6976.74	7073.19	-847.103	1	0.000999001	0.001998	0.000999001	1	MES	INJ	3.55336	3.81967
CGGA_1314	GBM	IV	IDHmut-non-codel	5.7	1	NonAltered	CGGA	NA	NA	NA	NA	NA	NA	NA	NA	NA	NA	NA	NA	2.35614	2.86592
CGGA_1317	Oligoastrocytoma	II	NA	81.4	0	NonAltered	CGGA	NA	NA	NA	NA	NA	NA	NA	NA	NA	NA	NA	NA	-0.234465	3.25248
CGGA_1318	Astrocytoma	II	IDHmut-non-codel	49.2	0	NonAltered	CGGA	NA	NA	NA	NA	NA	NA	NA	NA	NA	NA	NA	NA	1.63227	3.53481
CGGA_1319	Anaplastic Oligodendrolgioma	III	IDHwt	81.3	0	NA	CGGA	3853.49	1144.47	4563.89	-791.398	4043.46	0.000999001	1	1	1	0.000999001	PN	DEV	0.137504	4.0798
CGGA_1320	GBM	IV	IDHwt	1.9	1	NA	CGGA	3586.6	1988.75	6041.64	1271.43	2112.21	0.000999001	1	0.554446	1	0.0679321	PN	DEV	0.62293	3.49697
CGGA_1321	Anaplastic Astrocytoma	III	IDHmut-non-codel	23.1	1	NA	CGGA	NA	NA	NA	NA	NA	NA	NA	NA	NA	NA	NA	NA	0.83996	3.89142
CGGA_1322	Anaplastic Astrocytoma	III	IDHmut-non-codel	8.3	1	NonAltered	CGGA	NA	NA	NA	NA	NA	NA	NA	NA	NA	NA	NA	NA	-0.184425	4.27947
CGGA_1324	GBM	IV	IDHmut-codel	27.9	1	NA	CGGA	NA	NA	NA	NA	NA	NA	NA	NA	NA	NA	NA	NA	0.9855	3.72247
CGGA_1325	GBM	IV	NA	NA	NA	NonAltered	CGGA	NA	NA	NA	NA	NA	NA	NA	NA	NA	NA	NA	NA	0.0285692	3.29425
CGGA_1326	GBM	IV	IDHmut-non-codel	10.6	1	NA	CGGA	NA	NA	NA	NA	NA	NA	NA	NA	NA	NA	NA	NA	1.61824	2.88557
CGGA_1329	Anaplastic Astrocytoma	III	IDHmut-non-codel	10.7	1	NonAltered	CGGA	NA	NA	NA	NA	NA	NA	NA	NA	NA	NA	NA	NA	1.18269	4.41414
CGGA_1330	Astrocytoma	II	IDHmut-non-codel	80.8	0	NonAltered	CGGA	NA	NA	NA	NA	NA	NA	NA	NA	NA	NA	NA	NA	1.88753	3.9364
CGGA_1332	GBM	IV	IDHwt	16.8	0	NA	CGGA	3698.62	2221.51	7230.4	2884.83	1992.69	0.000999001	1	0.000999001	0.805195	0.100899	CL	DEV	2.43296	3.37016
CGGA_1334	Astrocytoma	II	IDHwt	4.8	1	NA	CGGA	3441.48	2487.86	7152.37	992.028	-112.164	0.000999001	1	0.000999001	1	0.995005	CL	DEV	2.14405	2.64847
CGGA_1335	Oligodendroglioma	II	IDHmut-codel	80.6	0	NA	CGGA	NA	NA	NA	NA	NA	NA	NA	NA	NA	NA	NA	NA	-0.535332	2.67807
CGGA_1337	GBM	IV	NA	71.4	1	NA	CGGA	NA	NA	NA	NA	NA	NA	NA	NA	NA	NA	NA	NA	0.214125	2.87774
CGGA_1338	GBM	IV	IDHwt	36.9	1	NonAltered	CGGA	2457.6	3917.99	5020.58	7511.33	1494.38	1	0.000999001	1	0.000999001	0.340659	MES	INJ	3.12433	3.5097
CGGA_1339	Oligodendroglioma	II	IDHmut-codel	80.4	0	NonAltered	CGGA	NA	NA	NA	NA	NA	NA	NA	NA	NA	NA	NA	NA	-0.251539	4.28466
CGGA_1340	Anaplastic Astrocytoma	III	IDHwt	36.5	1	NonAltered	CGGA	4124.01	2290.05	6110.55	39.9065	4377.67	0.000999001	1	0.474525	1	0.000999001	PN	DEV	-0.862496	4.36947
CGGA_1342	GBM	IV	IDHwt	6.1	1	NA	CGGA	2016.34	4489.49	5366.76	8509.28	-344.291	1	0.000999001	0.992008	0.000999001	0.998002	MES	INJ	3.50716	3.82579
CGGA_1343	GBM	IV	IDHwt	3.1	1	NonAltered	CGGA	NA	NA	NA	NA	NA	NA	NA	NA	NA	NA	NA	NA	1.51096	4.0027
CGGA_1345	Oligodendroglioma	II	IDHmut-codel	80.1	0	NA	CGGA	NA	NA	NA	NA	NA	NA	NA	NA	NA	NA	NA	NA	2.96162	2.83592
CGGA_1346	GBM	IV	IDHwt	9.3	1	NA	CGGA	NA	NA	NA	NA	NA	NA	NA	NA	NA	NA	NA	NA	3.91361	2.08406
CGGA_135	Anaplastic Astrocytoma	III	IDHwt	63.3	1	NA	CGGA	2291.84	4224.83	6259.72	7774.07	-394.667	1	0.000999001	0.267732	0.000999001	0.999001	MES	INJ	3.7137	3.32337
CGGA_1350	Oligodendroglioma	II	NA	79.9	0	NonAltered	CGGA	NA	NA	NA	NA	NA	NA	NA	NA	NA	NA	NA	NA	-0.0892673	2.9855
CGGA_1353	GBM	IV	IDHwt	33.6	1	NA	CGGA	3155.29	2917.48	7616.46	4120.6	-1109.34	0.747253	0.0939061	0.000999001	0.0659341	1	CL	INJ	1.15704	4.28762
CGGA_1354	GBM	IV	IDHwt	17.4	1	NA	CGGA	3259.51	2540.33	7068.87	3085.78	-32.5375	0.0519481	1	0.000999001	0.678322	0.993007	CL	DEV	2.69377	2.55582
CGGA_1356	Anaplastic Astrocytoma	III	IDHmut-non-codel	31.2	1	NA	CGGA	NA	NA	NA	NA	NA	NA	NA	NA	NA	NA	NA	NA	0.201634	3.16189
CGGA_1359	Anaplastic Astrocytoma	III	IDHwt	11.3	1	NA	CGGA	NA	NA	NA	NA	NA	NA	NA	NA	NA	NA	NA	NA	3.5472	2.15704
CGGA_1361	Oligodendroglioma	II	IDHmut-non-codel	79.4	0	NonAltered	CGGA	NA	NA	NA	NA	NA	NA	NA	NA	NA	NA	NA	NA	-0.37707	3.76341
CGGA_1362	Anaplastic Astrocytoma	III	IDHwt	79.4	0	NonAltered	CGGA	3829.1	2270.49	6046.12	-249.975	3039.78	0.000999001	1	0.548452	1	0.001998	PN	DEV	0.0703893	3.97269
CGGA_1365	GBM	IV	NA	8.3	1	NonAltered	CGGA	NA	NA	NA	NA	NA	NA	NA	NA	NA	NA	NA	NA	-0.395929	3.07211
CGGA_1368	Oligodendroglioma	II	NA	79.2	0	NonAltered	CGGA	NA	NA	NA	NA	NA	NA	NA	NA	NA	NA	NA	NA	-0.321928	3.10266
CGGA_1369	Anaplastic Oligodendrolgioma	III	IDHmut-non-codel	11.8	0	NA	CGGA	NA	NA	NA	NA	NA	NA	NA	NA	NA	NA	NA	NA	0.400538	2.9782
CGGA_1370	GBM	IV	IDHwt	10.7	0	NA	CGGA	NA	NA	NA	NA	NA	NA	NA	NA	NA	NA	NA	NA	0.495695	3.32769
CGGA_1371	GBM	IV	IDHwt	79	0	NA	CGGA	2520.09	2855.13	4858.14	4213.93	-1281.46	1	0.576424	1	0.042957	1	MES	INJ	1.852	2.27798
CGGA_1374	Anaplastic Astrocytoma	III	IDHmut-non-codel	4.6	1	NonAltered	CGGA	NA	NA	NA	NA	NA	NA	NA	NA	NA	NA	NA	NA	2.82782	4.73227
CGGA_1375	GBM	IV	IDHmut-non-codel	3	1	NA	CGGA	NA	NA	NA	NA	NA	NA	NA	NA	NA	NA	NA	NA	-0.535332	4.41886
CGGA_1377	Anaplastic Astrocytoma	III	IDHmut-non-codel	78.6	0	NonAltered	CGGA	NA	NA	NA	NA	NA	NA	NA	NA	NA	NA	NA	NA	0.15056	3.96347
CGGA_1378	GBM	IV	NA	12.4	1	NonAltered	CGGA	NA	NA	NA	NA	NA	NA	NA	NA	NA	NA	NA	NA	0.650765	3.04614
CGGA_1380	GBM	IV	IDHwt	9.6	1	NA	CGGA	3590.62	2769.48	6332.56	1890.9	1818.11	0.000999001	0.989011	0.196803	0.996004	0.15984	PN	DEV	0.879706	2.94486
CGGA_1381	GBM	IV	IDHmut-non-codel	1.5	1	NonAltered	CGGA	NA	NA	NA	NA	NA	NA	NA	NA	NA	NA	NA	NA	1.31615	3.86592
CGGA_1382	GBM	IV	IDHwt	9.3	1	NonAltered	CGGA	3471.19	2781.31	7187.67	1813.43	414.12	0.000999001	0.977023	0.000999001	0.999001	0.952048	CL	DEV	0.659925	3.97269
CGGA_1383	Anaplastic Astrocytoma	III	IDHmut-codel	29.1	0	NonAltered	CGGA	NA	NA	NA	NA	NA	NA	NA	NA	NA	NA	NA	NA	0.526069	3.03034
CGGA_1384	GBM	IV	IDHmut-non-codel	6.3	1	NonAltered	CGGA	NA	NA	NA	NA	NA	NA	NA	NA	NA	NA	NA	NA	1.65535	4.76818
CGGA_1386	Anaplastic Oligodendrolgioma	III	NA	78.3	0	NA	CGGA	NA	NA	NA	NA	NA	NA	NA	NA	NA	NA	NA	NA	1.46467	3.51223
CGGA_1387	GBM	IV	IDHwt	3	1	NA	CGGA	NA	NA	NA	NA	NA	NA	NA	NA	NA	NA	NA	NA	1.02857	4.1127
CGGA_1388	Anaplastic Astrocytoma	III	IDHmut-non-codel	15.9	1	NonAltered	CGGA	NA	NA	NA	NA	NA	NA	NA	NA	NA	NA	NA	NA	0.713696	4.31832
CGGA_1389	Anaplastic Oligodendrolgioma	III	IDHmut-codel	54.9	1	NA	CGGA	NA	NA	NA	NA	NA	NA	NA	NA	NA	NA	NA	NA	-0.200913	2.62761
CGGA_139	GBM	IV	IDHmut-non-codel	22.8	1	NA	CGGA	NA	NA	NA	NA	NA	NA	NA	NA	NA	NA	NA	NA	0.0285692	3.73985
CGGA_1390	Anaplastic Astrocytoma	III	IDHmut-non-codel	67.4	0	NA	CGGA	NA	NA	NA	NA	NA	NA	NA	NA	NA	NA	NA	NA	4.28614	2.42223
CGGA_1391	GBM	IV	IDHwt	14	0	NA	CGGA	3237.9	2429.84	5779.01	2903.7	1543.08	0.120879	1	0.836164	0.788212	0.30969	PN	DEV	1.68257	3.24336
CGGA_1392	GBM	IV	IDHwt	15.6	1	NA	CGGA	2751.21	2606.42	3521.65	5043.35	2862.33	1	1	1	0.000999001	0.004995	MES	NA	2.63227	2.60881
CGGA_1393	GBM	IV	IDHwt	9	1	NA	CGGA	NA	NA	NA	NA	NA	NA	NA	NA	NA	NA	NA	NA	2.8679	3.17473
CGGA_1394	GBM	IV	IDHmut-non-codel	4.6	1	NonAltered	CGGA	NA	NA	NA	NA	NA	NA	NA	NA	NA	NA	NA	NA	0.505891	4.18507
CGGA_1398	Anaplastic Astrocytoma	III	IDHmut-non-codel	18.2	1	NA	CGGA	NA	NA	NA	NA	NA	NA	NA	NA	NA	NA	NA	NA	0	3.46205
CGGA_1400	Anaplastic Oligodendrolgioma	III	NA	77.4	0	NA	CGGA	NA	NA	NA	NA	NA	NA	NA	NA	NA	NA	NA	NA	0.238787	3.42626
CGGA_1401	Anaplastic Astrocytoma	III	IDHmut-non-codel	55.2	1	NA	CGGA	NA	NA	NA	NA	NA	NA	NA	NA	NA	NA	NA	NA	0.298658	4.40395
CGGA_1402	GBM	IV	IDHwt	77.4	0	NA	CGGA	2467.39	3553.91	6477.1	5937.23	-1066.23	1	0.000999001	0.0879121	0.000999001	1	MES	INJ	2.94111	2.40054
CGGA_1403	GBM	IV	IDHwt	22.3	1	NA	CGGA	3506.23	2583.89	6079.1	2913.42	3056.07	0.000999001	1	0.506494	0.784216	0.001998	PN	DEV	2.60644	4.72629
CGGA_1404	Anaplastic Oligodendrolgioma	III	IDHmut-codel	77.4	0	NA	CGGA	NA	NA	NA	NA	NA	NA	NA	NA	NA	NA	NA	NA	0.765535	2.58736
CGGA_1406	Astrocytoma	II	IDHmut-non-codel	70.8	1	NonAltered	CGGA	NA	NA	NA	NA	NA	NA	NA	NA	NA	NA	NA	NA	0.765535	4.26828
CGGA_1407	Anaplastic Oligodendrolgioma	III	IDHmut-codel	76.9	0	NA	CGGA	NA	NA	NA	NA	NA	NA	NA	NA	NA	NA	NA	NA	1.51096	4.33985
CGGA_1408	Anaplastic Astrocytoma	III	IDHwt	44.8	1	NonAltered	CGGA	3235.14	3012.14	8069	2804.1	-1154.89	0.131868	0.000999001	0.000999001	0.842158	1	CL	INJ	0.298658	3.92315
CGGA_1409	GBM	IV	IDHmut-non-codel	76.8	0	NonAltered	CGGA	NA	NA	NA	NA	NA	NA	NA	NA	NA	NA	NA	NA	1.40599	4.81301
CGGA_1410	GBM	IV	IDHwt	27.1	1	NA	CGGA	3639.14	2473.98	7754.6	448.861	451.421	0.000999001	1	0.000999001	1	0.944056	CL	DEV	0.475085	4.85997
CGGA_1411	Anaplastic Astrocytoma	III	IDHwt	10.8	1	NonAltered	CGGA	NA	NA	NA	NA	NA	NA	NA	NA	NA	NA	NA	NA	2.22651	3.82171
CGGA_1412	GBM	IV	IDHmut-codel	9.7	1	NA	CGGA	NA	NA	NA	NA	NA	NA	NA	NA	NA	NA	NA	NA	0.863938	4.1914
CGGA_1413	Anaplastic Oligodendrolgioma	III	IDHmut-codel	76.9	0	NonAltered	CGGA	NA	NA	NA	NA	NA	NA	NA	NA	NA	NA	NA	NA	0.526069	4.8268
CGGA_1415	GBM	IV	IDHwt	76.9	0	NonAltered	CGGA	NA	NA	NA	NA	NA	NA	NA	NA	NA	NA	NA	NA	4.53978	2.48543
CGGA_1416	Anaplastic Oligodendrolgioma	III	IDHmut-codel	63.6	1	NA	CGGA	NA	NA	NA	NA	NA	NA	NA	NA	NA	NA	NA	NA	0.189034	2.65992
CGGA_1417	Anaplastic Oligodendrolgioma	III	IDHmut-codel	76.7	0	NonAltered	CGGA	NA	NA	NA	NA	NA	NA	NA	NA	NA	NA	NA	NA	-0.643856	5.08576
CGGA_1418	GBM	IV	NA	9.4	1	NonAltered	CGGA	NA	NA	NA	NA	NA	NA	NA	NA	NA	NA	NA	NA	-0.234465	3.03034
CGGA_1419	GBM	IV	IDHwt	8.2	1	NA	CGGA	NA	NA	NA	NA	NA	NA	NA	NA	NA	NA	NA	NA	2	3.41819
CGGA_1420	GBM	IV	IDHwt	12	1	NA	CGGA	3599.86	2229.92	4987.9	652.094	2431.67	0.000999001	1	1	1	0.020979	PN	DEV	0.545968	1.59932
CGGA_1421	Anaplastic Oligodendrolgioma	III	NA	76.2	0	NA	CGGA	NA	NA	NA	NA	NA	NA	NA	NA	NA	NA	NA	NA	2.89724	2.41143
CGGA_1422	GBM	IV	NA	6.7	1	Altered	CGGA	NA	NA	NA	NA	NA	NA	NA	NA	NA	NA	NA	NA	1.09085	2.72247
CGGA_1424	Anaplastic Oligodendrolgioma	III	NA	76	0	NonAltered	CGGA	NA	NA	NA	NA	NA	NA	NA	NA	NA	NA	NA	NA	-0.434403	2.08406
CGGA_1425	GBM	IV	NA	21	1	NA	CGGA	NA	NA	NA	NA	NA	NA	NA	NA	NA	NA	NA	NA	0.713696	3.37156
CGGA_1426	GBM	IV	IDHwt	4.4	1	NA	CGGA	3572.05	2469.22	5368.92	2264.15	4163.37	0.000999001	1	0.992008	0.974026	0.000999001	PN	DEV	2.78031	3.14568
CGGA_1427	Oligoastrocytoma	II	NA	11.1	0	NA	CGGA	NA	NA	NA	NA	NA	NA	NA	NA	NA	NA	NA	NA	-0.454032	2.74846
CGGA_1429	GBM	IV	IDHmut-codel	75.7	0	NonAltered	CGGA	NA	NA	NA	NA	NA	NA	NA	NA	NA	NA	NA	NA	0.773996	4.49953
CGGA_1430	GBM	IV	IDHwt	5.3	1	NA	CGGA	NA	NA	NA	NA	NA	NA	NA	NA	NA	NA	NA	NA	0.286881	4.13093
CGGA_1431	Anaplastic Astrocytoma	III	IDHmut-non-codel	67.3	1	NA	CGGA	NA	NA	NA	NA	NA	NA	NA	NA	NA	NA	NA	NA	-0.415037	3.19849
CGGA_1433	GBM	IV	IDHwt	13	1	NA	CGGA	3110.98	2890.57	7024.13	4792.04	204.683	0.95005	0.246753	0.000999001	0.001998	0.971029	CL	INJ	3.07895	2.44626
CGGA_1434	Anaplastic Astrocytoma	III	IDHwt	2.2	1	NA	CGGA	NA	NA	NA	NA	NA	NA	NA	NA	NA	NA	NA	NA	3.40735	2.95791
CGGA_1435	Anaplastic Astrocytoma	III	IDHmut-non-codel	54.5	1	NA	CGGA	NA	NA	NA	NA	NA	NA	NA	NA	NA	NA	NA	NA	1.7137	3.32337
CGGA_1437	Anaplastic Astrocytoma	III	IDHwt	34.1	1	NA	CGGA	NA	NA	NA	NA	NA	NA	NA	NA	NA	NA	NA	NA	1.0635	2.64155
CGGA_1440	Oligodendroglioma	II	IDHmut-codel	75.3	0	NA	CGGA	NA	NA	NA	NA	NA	NA	NA	NA	NA	NA	NA	NA	0	3.02148
CGGA_1441	GBM	IV	IDHwt	61.9	1	NA	CGGA	2197.4	3504.86	5178.4	6166.43	-1185.71	1	0.000999001	1	0.000999001	1	MES	INJ	1.97453	1.95606
CGGA_1443	Astrocytoma	II	IDHwt	75.1	0	NA	CGGA	NA	NA	NA	NA	NA	NA	NA	NA	NA	NA	NA	NA	3.56316	2.86592
CGGA_1444	GBM	IV	IDHwt	12.4	1	NA	CGGA	3562.95	2275.78	4560.28	2042.08	4553.29	0.000999001	1	1	0.99001	0.000999001	PN	DEV	1.31034	2.54844
CGGA_1445	Anaplastic Astrocytoma	III	NA	75.1	0	NonAltered	CGGA	NA	NA	NA	NA	NA	NA	NA	NA	NA	NA	NA	NA	1.60881	3.64847
CGGA_1446	Oligoastrocytoma	II	NA	75.1	0	NonAltered	CGGA	NA	NA	NA	NA	NA	NA	NA	NA	NA	NA	NA	NA	-0.535332	3.2854
CGGA_1447	Anaplastic Astrocytoma	III	NA	10.1	1	NA	CGGA	NA	NA	NA	NA	NA	NA	NA	NA	NA	NA	NA	NA	-0.217591	3.49442
CGGA_1450	GBM	IV	IDHmut-codel	31.5	1	NA	CGGA	NA	NA	NA	NA	NA	NA	NA	NA	NA	NA	NA	NA	-0.0588937	3.80116
CGGA_1451	GBM	IV	IDHwt	14.4	1	NA	CGGA	2575.74	3237.37	5011.69	6178.97	916.442	1	0.000999001	1	0.000999001	0.742258	MES	INJ	4.26754	0.83996
CGGA_1452	GBM	IV	IDHwt	15.4	1	NA	CGGA	2813.92	2757.32	3474.17	5582.23	3378.73	1	0.992008	1	0.000999001	0.000999001	NA	INJ	3.42358	2.54102
CGGA_1454	Astrocytoma	II	IDHwt	74.8	0	NA	CGGA	3808.73	2090.7	5315.83	-1067.2	3127.38	0.000999001	1	0.995005	1	0.000999001	PN	DEV	-0.0144996	2.58256
CGGA_1455	Oligodendroglioma	II	NA	74.8	0	NonAltered	CGGA	NA	NA	NA	NA	NA	NA	NA	NA	NA	NA	NA	NA	-0.454032	3.53605
CGGA_1457	GBM	IV	IDHwt	10.3	1	NA	CGGA	2491.02	3267.11	4876.31	4526.27	2017.57	1	0.000999001	1	0.00899101	0.0929071	MES	INJ	3.42089	3.1177
CGGA_1458	Anaplastic Oligodendrolgioma	III	IDHmut-codel	4.2	1	NA	CGGA	NA	NA	NA	NA	NA	NA	NA	NA	NA	NA	NA	NA	-0.340075	3.26903
CGGA_1459	Anaplastic Astrocytoma	III	IDHwt	16.5	1	NA	CGGA	NA	NA	NA	NA	NA	NA	NA	NA	NA	NA	NA	NA	1.85997	4.34199
CGGA_1460	GBM	IV	IDHwt	6.9	1	NA	CGGA	NA	NA	NA	NA	NA	NA	NA	NA	NA	NA	NA	NA	1.28096	3.28983
CGGA_1461	GBM	IV	IDHwt	7.4	1	NA	CGGA	3281.81	2506.79	7902.01	2629.16	-1191.82	0.01998	1	0.000999001	0.907093	1	CL	DEV	1.852	2.85798
CGGA_1462	GBM	IV	IDHwt	5.7	1	NA	CGGA	3023.83	3159.65	6195.43	5002.59	291.397	1	0.000999001	0.361638	0.000999001	0.967033	MES	INJ	3.83794	1.95606
CGGA_1463	Oligodendroglioma	II	IDHmut-codel	74	0	NonAltered	CGGA	NA	NA	NA	NA	NA	NA	NA	NA	NA	NA	NA	NA	-0.234465	4.30086
CGGA_1467	GBM	IV	NA	28.5	1	NonAltered	CGGA	NA	NA	NA	NA	NA	NA	NA	NA	NA	NA	NA	NA	-0.184425	3.75168
CGGA_1469	Anaplastic Oligoastrocytoma	III	NA	73.8	0	NA	CGGA	NA	NA	NA	NA	NA	NA	NA	NA	NA	NA	NA	NA	-0.494109	3.20789
CGGA_1471	Astrocytoma	II	IDHmut-non-codel	73.9	0	NA	CGGA	NA	NA	NA	NA	NA	NA	NA	NA	NA	NA	NA	NA	1.30451	2.88557
CGGA_1472	GBM	IV	NA	33.7	1	NA	CGGA	NA	NA	NA	NA	NA	NA	NA	NA	NA	NA	NA	NA	1.84398	2.9279
CGGA_1473	Anaplastic Astrocytoma	III	NA	8.7	1	NA	CGGA	NA	NA	NA	NA	NA	NA	NA	NA	NA	NA	NA	NA	1.96717	3.30159
CGGA_1474	Anaplastic Oligodendrolgioma	III	NA	10.9	0	NonAltered	CGGA	NA	NA	NA	NA	NA	NA	NA	NA	NA	NA	NA	NA	-0.643856	3.08576
CGGA_1475	GBM	IV	IDHmut-non-codel	6	1	NA	CGGA	NA	NA	NA	NA	NA	NA	NA	NA	NA	NA	NA	NA	2.19219	4.10852
CGGA_1476	GBM	IV	IDHwt	9.8	1	NA	CGGA	3542.87	2216.41	6351.73	830.951	752.283	0.000999001	1	0.178821	1	0.831169	CL	DEV	1.87578	2.77189
CGGA_1477	Oligoastrocytoma	II	NA	39.3	1	NA	CGGA	NA	NA	NA	NA	NA	NA	NA	NA	NA	NA	NA	NA	0.367371	3.46728
CGGA_1478	GBM	IV	IDHwt	17.8	1	NA	CGGA	3576.18	1821.9	7091.54	858.343	-523.982	0.000999001	1	0.000999001	1	1	CL	DEV	2.7761	3.64155
CGGA_1480	GBM	IV	IDHwt	13.3	1	NA	CGGA	NA	NA	NA	NA	NA	NA	NA	NA	NA	NA	NA	NA	3.6837	2.75275
CGGA_1481	GBM	IV	NA	4.3	1	NonAltered	CGGA	NA	NA	NA	NA	NA	NA	NA	NA	NA	NA	NA	NA	0.226509	1.74846
CGGA_1482	Anaplastic Oligodendrolgioma	III	NA	72.7	0	NA	CGGA	NA	NA	NA	NA	NA	NA	NA	NA	NA	NA	NA	NA	0.389567	3.10936
CGGA_1486	GBM	IV	NA	6	1	Altered	CGGA	NA	NA	NA	NA	NA	NA	NA	NA	NA	NA	NA	NA	-0.0439433	1.52105
CGGA_1487	Anaplastic Astrocytoma	III	IDHwt	17.1	1	NA	CGGA	NA	NA	NA	NA	NA	NA	NA	NA	NA	NA	NA	NA	2.18903	2.0635
CGGA_1488	Astrocytoma	II	IDHmut-non-codel	72.5	0	NA	CGGA	NA	NA	NA	NA	NA	NA	NA	NA	NA	NA	NA	NA	-0.494109	4.42425
CGGA_1491	GBM	IV	IDHmut-non-codel	8.1	1	NA	CGGA	NA	NA	NA	NA	NA	NA	NA	NA	NA	NA	NA	NA	2.27501	2.34483
CGGA_1492	GBM	IV	IDHwt	8.8	1	NA	CGGA	NA	NA	NA	NA	NA	NA	NA	NA	NA	NA	NA	NA	3.02148	4.1819
CGGA_1494	GBM	IV	NA	8.8	1	NonAltered	CGGA	NA	NA	NA	NA	NA	NA	NA	NA	NA	NA	NA	NA	-0.494109	2.98185
CGGA_1496	GBM	IV	IDHmut-codel	10.8	1	NA	CGGA	NA	NA	NA	NA	NA	NA	NA	NA	NA	NA	NA	NA	0.0840643	4.21723
CGGA_1497	Anaplastic Astrocytoma	III	IDHmut-non-codel	38.7	1	NonAltered	CGGA	NA	NA	NA	NA	NA	NA	NA	NA	NA	NA	NA	NA	-0.168123	4.38819
CGGA_1498	GBM	IV	NA	NA	NA	Altered	CGGA	NA	NA	NA	NA	NA	NA	NA	NA	NA	NA	NA	NA	1.23266	1.94111
CGGA_1500	GBM	IV	IDHwt	3.6	1	NA	CGGA	3558.84	2678.92	6414.91	1544.45	1928.49	0.000999001	1	0.122877	1	0.115884	PN	DEV	1.40054	2.33056
CGGA_1501	GBM	IV	NA	7.3	1	NA	CGGA	NA	NA	NA	NA	NA	NA	NA	NA	NA	NA	NA	NA	1.93357	3.97085
CGGA_1502	Oligodendroglioma	II	IDHmut-codel	71.8	0	NA	CGGA	NA	NA	NA	NA	NA	NA	NA	NA	NA	NA	NA	NA	0.978196	2.47249
CGGA_1503	GBM	IV	NA	25.5	1	NonAltered	CGGA	NA	NA	NA	NA	NA	NA	NA	NA	NA	NA	NA	NA	0.695994	2.84197
CGGA_1504	Anaplastic Astrocytoma	III	IDHmut-non-codel	71.6	0	NA	CGGA	NA	NA	NA	NA	NA	NA	NA	NA	NA	NA	NA	NA	0.464668	2.852
CGGA_1505	GBM	IV	IDHmut-non-codel	5.7	1	NA	CGGA	NA	NA	NA	NA	NA	NA	NA	NA	NA	NA	NA	NA	2.40871	4.20477
CGGA_1507	GBM	IV	IDHwt	23.5	1	NA	CGGA	NA	NA	NA	NA	NA	NA	NA	NA	NA	NA	NA	NA	1.67356	2.74631
CGGA_1508	Anaplastic Astrocytoma	III	IDHmut-non-codel	34.5	1	NA	CGGA	NA	NA	NA	NA	NA	NA	NA	NA	NA	NA	NA	NA	0.815575	2.14078
CGGA_1510	Anaplastic Astrocytoma	III	IDHmut-non-codel	8.9	1	NA	CGGA	NA	NA	NA	NA	NA	NA	NA	NA	NA	NA	NA	NA	0.0840643	3.1177
CGGA_1513	Anaplastic Oligodendrolgioma	III	IDHmut-codel	70.7	0	NA	CGGA	NA	NA	NA	NA	NA	NA	NA	NA	NA	NA	NA	NA	-0.286304	2.46205
CGGA_1514	Astrocytoma	II	NA	2.5	1	NonAltered	CGGA	NA	NA	NA	NA	NA	NA	NA	NA	NA	NA	NA	NA	-0.415037	2.5435
CGGA_1516	Oligodendroglioma	II	IDHmut-codel	70.7	0	NA	CGGA	NA	NA	NA	NA	NA	NA	NA	NA	NA	NA	NA	NA	0.111031	2.91265
CGGA_1517	Oligodendroglioma	II	IDHmut-codel	70.7	0	NA	CGGA	NA	NA	NA	NA	NA	NA	NA	NA	NA	NA	NA	NA	0.0703893	2.58736
CGGA_1518	Anaplastic Astrocytoma	III	IDHwt	13.5	1	NA	CGGA	4057.14	1711.8	5102.72	85.8481	4163.51	0.000999001	1	1	1	0.000999001	PN	DEV	0.773996	3.29278
CGGA_1520	GBM	IV	IDHwt	9.8	1	NA	CGGA	NA	NA	NA	NA	NA	NA	NA	NA	NA	NA	NA	NA	1.52607	2.23879
CGGA_1521	GBM	IV	IDHwt	6.7	1	NonAltered	CGGA	3281.82	3083.46	7718.41	2357.33	-1373.59	0.01998	0.000999001	0.000999001	0.959041	1	CL	INJ	1.80735	4.36947
CGGA_1523	Astrocytoma	II	IDHmut-non-codel	70.4	0	NA	CGGA	NA	NA	NA	NA	NA	NA	NA	NA	NA	NA	NA	NA	0.948601	3.68482
CGGA_1524	Anaplastic Oligodendrolgioma	III	IDHmut-codel	33	1	NA	CGGA	NA	NA	NA	NA	NA	NA	NA	NA	NA	NA	NA	NA	0.321928	2.93734
CGGA_1525	Anaplastic Oligoastrocytoma	III	NA	55.4	1	NA	CGGA	NA	NA	NA	NA	NA	NA	NA	NA	NA	NA	NA	NA	1.37851	2.848
CGGA_1526	Anaplastic Oligodendrolgioma	III	IDHmut-codel	69.8	0	NA	CGGA	NA	NA	NA	NA	NA	NA	NA	NA	NA	NA	NA	NA	0.0426443	4.26903
CGGA_1527	Anaplastic Astrocytoma	III	IDHmut-non-codel	56.4	1	NA	CGGA	NA	NA	NA	NA	NA	NA	NA	NA	NA	NA	NA	NA	0.214125	2.9241
CGGA_1528	Oligodendroglioma	II	IDHmut-codel	69.6	0	NA	CGGA	NA	NA	NA	NA	NA	NA	NA	NA	NA	NA	NA	NA	0.298658	2.93923
CGGA_1529	GBM	IV	IDHwt	19.2	1	NA	CGGA	3695.97	1828.81	5343.05	930.277	4313.9	0.000999001	1	0.994006	1	0.000999001	PN	DEV	0.0285692	2.9486
CGGA_1530	Anaplastic Oligoastrocytoma	III	NA	69.6	0	NA	CGGA	NA	NA	NA	NA	NA	NA	NA	NA	NA	NA	NA	NA	2.15056	4.36527
CGGA_1531	Anaplastic Astrocytoma	III	IDHmut-non-codel	NA	NA	NA	CGGA	NA	NA	NA	NA	NA	NA	NA	NA	NA	NA	NA	NA	-0.514573	4.33842
CGGA_1533	Anaplastic Astrocytoma	III	IDHwt	40	1	NA	CGGA	NA	NA	NA	NA	NA	NA	NA	NA	NA	NA	NA	NA	3.35896	1.74846
CGGA_1534	GBM	IV	IDHmut-non-codel	0.9	1	NA	CGGA	NA	NA	NA	NA	NA	NA	NA	NA	NA	NA	NA	NA	0.286881	2.66903
CGGA_1535	GBM	IV	IDHmut-non-codel	7.6	1	NA	CGGA	NA	NA	NA	NA	NA	NA	NA	NA	NA	NA	NA	NA	2.46467	2.61589
CGGA_1536	Astrocytoma	II	IDHmut-non-codel	27.6	1	NA	CGGA	NA	NA	NA	NA	NA	NA	NA	NA	NA	NA	NA	NA	0.137504	4.6094
CGGA_1537	GBM	IV	IDHwt	3.2	1	NA	CGGA	3142.72	2661.47	7168.45	3759.39	-1106.04	0.823177	1	0.000999001	0.194805	1	CL	DEV	0.903038	2.81352
CGGA_1538	GBM	IV	IDHwt	8.1	1	NA	CGGA	NA	NA	NA	NA	NA	NA	NA	NA	NA	NA	NA	NA	3.0197	3.06178
CGGA_1539	GBM	IV	IDHmut-non-codel	68.6	0	NA	CGGA	NA	NA	NA	NA	NA	NA	NA	NA	NA	NA	NA	NA	-0.251539	4.3067
CGGA_1541	GBM	IV	IDHwt	2.2	1	NA	CGGA	NA	NA	NA	NA	NA	NA	NA	NA	NA	NA	NA	NA	0.765535	2.76129
CGGA_1542	GBM	IV	NA	6	0	NA	CGGA	NA	NA	NA	NA	NA	NA	NA	NA	NA	NA	NA	NA	-0.713119	2.34483
CGGA_1543	GBM	IV	IDHmut-non-codel	23.8	1	NA	CGGA	NA	NA	NA	NA	NA	NA	NA	NA	NA	NA	NA	NA	2.01436	3.25096
CGGA_1544	Anaplastic Astrocytoma	III	IDHmut-non-codel	6.8	1	NA	CGGA	NA	NA	NA	NA	NA	NA	NA	NA	NA	NA	NA	NA	0.0976108	2.70708
CGGA_1546	GBM	IV	IDHwt	7.3	1	NA	CGGA	2218.38	3411.27	4598.77	7086.87	-204.668	1	0.000999001	1	0.000999001	0.995005	MES	INJ	3.48156	2.1635
CGGA_1548	GBM	IV	IDHwt	34.7	1	NA	CGGA	3181.16	2584.99	5862.64	4059.06	654.814	0.537463	1	0.749251	0.0759241	0.875125	MES	DEV	2.21412	2.19849
CGGA_1551	GBM	IV	NA	11.4	1	NA	CGGA	NA	NA	NA	NA	NA	NA	NA	NA	NA	NA	NA	NA	4.36107	3.59694
CGGA_1552	Anaplastic Oligodendrolgioma	III	IDHmut-codel	67.5	0	NA	CGGA	NA	NA	NA	NA	NA	NA	NA	NA	NA	NA	NA	NA	0.163499	2.82171
CGGA_1553	Anaplastic Astrocytoma	III	IDHmut-non-codel	17.8	1	NA	CGGA	NA	NA	NA	NA	NA	NA	NA	NA	NA	NA	NA	NA	0.298658	3.56682
CGGA_1554	Anaplastic Oligodendrolgioma	III	IDHmut-codel	27.1	1	NA	CGGA	NA	NA	NA	NA	NA	NA	NA	NA	NA	NA	NA	NA	1.01436	3.53232
CGGA_1557	Anaplastic Oligodendrolgioma	III	IDHmut-codel	67.3	0	NA	CGGA	NA	NA	NA	NA	NA	NA	NA	NA	NA	NA	NA	NA	1.79494	2.69153
CGGA_1558	GBM	IV	IDHwt	4.3	1	NA	CGGA	NA	NA	NA	NA	NA	NA	NA	NA	NA	NA	NA	NA	0.687061	3.09424
CGGA_1559	GBM	IV	IDHmut-codel	19.8	1	NA	CGGA	NA	NA	NA	NA	NA	NA	NA	NA	NA	NA	NA	NA	1.12433	2.33628
CGGA_1560	GBM	IV	IDHmut-non-codel	15.1	1	NA	CGGA	NA	NA	NA	NA	NA	NA	NA	NA	NA	NA	NA	NA	3.07211	3.00899
CGGA_1562	Anaplastic Oligodendrolgioma	III	IDHmut-codel	67.2	0	NA	CGGA	NA	NA	NA	NA	NA	NA	NA	NA	NA	NA	NA	NA	1.09761	2.9982
CGGA_1563	Astrocytoma	II	IDHwt	67.2	0	NA	CGGA	2431.89	3379.68	5159.32	4618.73	-839.748	1	0.000999001	1	0.004995	1	MES	INJ	1.87578	3.28983
CGGA_1564	GBM	IV	IDHwt	6.2	1	NA	CGGA	3566.75	1661.35	5755.08	902.42	1819.77	0.000999001	1	0.846154	1	0.15984	PN	DEV	0.9855	4.04614
CGGA_1565	Anaplastic Astrocytoma	III	IDHmut-non-codel	46.6	0	NA	CGGA	NA	NA	NA	NA	NA	NA	NA	NA	NA	NA	NA	NA	1.72683	2.8339
CGGA_1566	Anaplastic Oligodendrolgioma	III	IDHmut-codel	67.1	0	NA	CGGA	NA	NA	NA	NA	NA	NA	NA	NA	NA	NA	NA	NA	-0.0439433	3.62059
CGGA_1567	Anaplastic Oligodendrolgioma	III	IDHmut-non-codel	27.6	1	NA	CGGA	NA	NA	NA	NA	NA	NA	NA	NA	NA	NA	NA	NA	1.66448	2.88557
CGGA_1568	Anaplastic Astrocytoma	III	NA	11.3	0	NA	CGGA	NA	NA	NA	NA	NA	NA	NA	NA	NA	NA	NA	NA	0.411426	3.25096
CGGA_1569	Anaplastic Astrocytoma	III	NA	46.2	0	NA	CGGA	NA	NA	NA	NA	NA	NA	NA	NA	NA	NA	NA	NA	-0.37707	2.87184
CGGA_157	Astrocytoma	II	NA	30	1	NA	CGGA	NA	NA	NA	NA	NA	NA	NA	NA	NA	NA	NA	NA	0.516015	2.28688
CGGA_1571	GBM	IV	IDHmut-non-codel	13.5	0	NA	CGGA	NA	NA	NA	NA	NA	NA	NA	NA	NA	NA	NA	NA	-0.200913	2.4489
CGGA_1572	GBM	IV	IDHwt	5.3	1	NA	CGGA	NA	NA	NA	NA	NA	NA	NA	NA	NA	NA	NA	NA	0.773996	2.1375
CGGA_1575	Anaplastic Astrocytoma	III	IDHmut-non-codel	4.2	1	NA	CGGA	NA	NA	NA	NA	NA	NA	NA	NA	NA	NA	NA	NA	1.99639	3.09424
CGGA_1579	Astrocytoma	II	IDHwt	66.3	0	NA	CGGA	3653.98	1659.56	4299.58	-182.8	2912.87	0.000999001	1	1	1	0.004995	PN	DEV	0	2.10434
CGGA_1580	Anaplastic Astrocytoma	III	IDHmut-non-codel	52	1	NA	CGGA	NA	NA	NA	NA	NA	NA	NA	NA	NA	NA	NA	NA	0.0285692	4.25172
CGGA_1583	Oligoastrocytoma	II	NA	52.8	1	NA	CGGA	NA	NA	NA	NA	NA	NA	NA	NA	NA	NA	NA	NA	-0.434403	2.41414
CGGA_1586	GBM	IV	IDHwt	7.6	1	NA	CGGA	2544.35	3431.11	5130.76	6912.89	114.987	1	0.000999001	1	0.000999001	0.983017	MES	INJ	3.97636	2.97269
CGGA_1587	Anaplastic Astrocytoma	III	IDHmut-non-codel	24.7	1	NA	CGGA	NA	NA	NA	NA	NA	NA	NA	NA	NA	NA	NA	NA	0.704872	3.14731
CGGA_1588	Anaplastic Astrocytoma	III	IDHwt	65.9	0	NA	CGGA	2897.28	2081.33	3352.43	3567.05	2077.14	1	1	1	0.306693	0.0769231	PN	NA	2.28392	4.37782
CGGA_1589	Astrocytoma	II	IDHwt	11.2	1	NA	CGGA	NA	NA	NA	NA	NA	NA	NA	NA	NA	NA	NA	NA	-0.415037	4.02857
CGGA_1591	Anaplastic Astrocytoma	III	IDHmut-non-codel	37.2	1	NA	CGGA	NA	NA	NA	NA	NA	NA	NA	NA	NA	NA	NA	NA	0.807355	4.12516
CGGA_1592	Anaplastic Oligodendrolgioma	III	IDHmut-codel	52.2	1	NonAltered	CGGA	NA	NA	NA	NA	NA	NA	NA	NA	NA	NA	NA	NA	1.46467	4.58135
CGGA_1594	Astrocytoma	II	NA	15.8	0	NA	CGGA	NA	NA	NA	NA	NA	NA	NA	NA	NA	NA	NA	NA	1.13093	4.1102
CGGA_1595	GBM	IV	NA	65.2	0	NA	CGGA	NA	NA	NA	NA	NA	NA	NA	NA	NA	NA	NA	NA	0.333424	4.19061
CGGA_1596	GBM	IV	IDHwt	6.7	1	NA	CGGA	3384.1	2010.14	4745.92	1118.38	2312.74	0.000999001	1	1	1	0.02997	PN	DEV	0.356144	3.38681
CGGA_1597	GBM	IV	IDHwt	5.7	1	NA	CGGA	2948.18	2919.38	5365.99	3772.48	1910.16	1	0.0859141	0.992008	0.188811	0.123876	PN	INJ	1.9782	2.14731
CGGA_1598	Anaplastic Astrocytoma	III	IDHwt	18.5	1	NA	CGGA	3448.9	1827.68	3514.85	851.405	4141.38	0.000999001	1	1	1	0.000999001	PN	DEV	0.687061	2.70266
CGGA_1601	GBM	IV	IDHwt	23.3	1	NA	CGGA	2649.74	3257.75	5091.52	4832.59	521.81	1	0.000999001	1	0.001998	0.923077	MES	INJ	2.51096	2.64616
CGGA_1603	GBM	IV	IDHwt	11.7	1	NA	CGGA	NA	NA	NA	NA	NA	NA	NA	NA	NA	NA	NA	NA	3.26003	2.59216
CGGA_1604	GBM	IV	IDHmut-non-codel	24.3	1	NA	CGGA	NA	NA	NA	NA	NA	NA	NA	NA	NA	NA	NA	NA	2.25399	2.29866
CGGA_1605	GBM	IV	IDHwt	10.6	1	NA	CGGA	NA	NA	NA	NA	NA	NA	NA	NA	NA	NA	NA	NA	0.604071	2.27798
CGGA_1606	Anaplastic Astrocytoma	III	IDHwt	15.5	1	NA	CGGA	3694.63	2212.17	5279.86	1638.97	4242.1	0.000999001	1	0.999001	0.999001	0.000999001	PN	DEV	0.799087	4.6011
CGGA_1607	Oligodendroglioma	II	IDHmut-codel	43.8	1	NA	CGGA	NA	NA	NA	NA	NA	NA	NA	NA	NA	NA	NA	NA	1.86394	2.72683
CGGA_1608	Anaplastic Astrocytoma	III	IDHmut-non-codel	64.2	0	NA	CGGA	NA	NA	NA	NA	NA	NA	NA	NA	NA	NA	NA	NA	1.04963	2.87971
CGGA_1610	Anaplastic Oligoastrocytoma	III	NA	34.8	1	NA	CGGA	NA	NA	NA	NA	NA	NA	NA	NA	NA	NA	NA	NA	2.28983	4.1177
CGGA_1611	GBM	IV	IDHmut-non-codel	38.1	1	NA	CGGA	NA	NA	NA	NA	NA	NA	NA	NA	NA	NA	NA	NA	-0.0291463	4.14323
CGGA_1612	GBM	IV	IDHwt	23.6	1	NA	CGGA	2638.89	3230.43	5659.69	5846.62	-530.823	1	0.000999001	0.916084	0.000999001	1	MES	INJ	4.6565	2.41684
CGGA_1613	GBM	IV	IDHwt	8.2	0	NA	CGGA	2551.77	2946.98	4661.13	4665.51	619.622	1	0.018981	1	0.004995	0.888112	MES	INJ	3.41007	2.488
CGGA_1614	Anaplastic Astrocytoma	III	IDHmut-non-codel	35.5	1	NA	CGGA	NA	NA	NA	NA	NA	NA	NA	NA	NA	NA	NA	NA	0.0840643	3.12928
CGGA_1615	GBM	IV	NA	19.3	1	NA	CGGA	NA	NA	NA	NA	NA	NA	NA	NA	NA	NA	NA	NA	3.12102	2.69153
CGGA_1617	Oligodendroglioma	II	NA	63.6	0	NA	CGGA	NA	NA	NA	NA	NA	NA	NA	NA	NA	NA	NA	NA	-0.251539	2.58015
CGGA_1618	Anaplastic Astrocytoma	III	IDHmut-non-codel	63.7	0	NA	CGGA	NA	NA	NA	NA	NA	NA	NA	NA	NA	NA	NA	NA	-0.68966	2.62059
CGGA_1619	Anaplastic Astrocytoma	III	IDHmut-non-codel	25.2	1	NA	CGGA	NA	NA	NA	NA	NA	NA	NA	NA	NA	NA	NA	NA	0.565597	2.43829
CGGA_1620	Anaplastic Oligodendrolgioma	III	IDHmut-codel	63.5	0	NA	CGGA	NA	NA	NA	NA	NA	NA	NA	NA	NA	NA	NA	NA	-0.200913	2.81352
CGGA_1621	Astrocytoma	II	IDHmut-non-codel	63.5	0	NA	CGGA	NA	NA	NA	NA	NA	NA	NA	NA	NA	NA	NA	NA	-0.340075	2.73118
CGGA_1623	Anaplastic Astrocytoma	III	IDHwt	63.4	0	NA	CGGA	3579.07	2669.29	7160.15	1388.64	-17.8589	0.000999001	1	0.000999001	1	0.99001	CL	DEV	2.38957	2.40054
CGGA_1624	GBM	IV	IDHmut-non-codel	2.9	1	NA	CGGA	NA	NA	NA	NA	NA	NA	NA	NA	NA	NA	NA	NA	0.879706	3.66562
CGGA_1626	GBM	IV	IDHwt	22.9	1	NA	CGGA	2862.54	2944.28	5456.11	4980.84	1300.72	1	0.024975	0.976024	0.000999001	0.481518	MES	INJ	2.60407	2.65076
CGGA_1627	Anaplastic Astrocytoma	III	IDHmut-non-codel	63.2	0	NA	CGGA	NA	NA	NA	NA	NA	NA	NA	NA	NA	NA	NA	NA	0.214125	3.06523
CGGA_1630	Oligodendroglioma	II	NA	62.9	0	NA	CGGA	NA	NA	NA	NA	NA	NA	NA	NA	NA	NA	NA	NA	-0.37707	1.87184
CGGA_1631	GBM	IV	IDHwt	7.3	1	NA	CGGA	NA	NA	NA	NA	NA	NA	NA	NA	NA	NA	NA	NA	1.81147	2.81352
CGGA_1634	GBM	IV	IDHwt	12	1	NA	CGGA	2971.39	2717.77	4020.36	3850.63	2738.09	1	1	1	0.145854	0.00699301	PN	NA	3.17313	2.70487
CGGA_1635	GBM	IV	NA	10.9	1	NonAltered	CGGA	NA	NA	NA	NA	NA	NA	NA	NA	NA	NA	NA	NA	-0.415037	2.77821
CGGA_1640	Anaplastic Oligoastrocytoma	III	NA	62	0	NA	CGGA	NA	NA	NA	NA	NA	NA	NA	NA	NA	NA	NA	NA	0.948601	3.03386
CGGA_1641	GBM	IV	IDHwt	9.6	1	NA	CGGA	NA	NA	NA	NA	NA	NA	NA	NA	NA	NA	NA	NA	1.70929	1.90304
CGGA_1642	Astrocytoma	II	IDHmut-non-codel	62	0	NA	CGGA	NA	NA	NA	NA	NA	NA	NA	NA	NA	NA	NA	NA	-0.37707	2.91839
CGGA_1643	GBM	IV	IDHwt	5.6	0	NA	CGGA	3690.28	2203	4125.11	2344.2	4264.36	0.000999001	1	1	0.961039	0.000999001	PN	DEV	2.75489	2.12763
CGGA_1644	GBM	IV	IDHwt	5.7	1	NA	CGGA	2761.01	2505.51	4988.58	3913.67	412.683	1	1	1	0.124875	0.952048	MES	NA	3.12102	2.64616
CGGA_1645	Anaplastic Astrocytoma	III	IDHmut-non-codel	61.1	0	NonAltered	CGGA	NA	NA	NA	NA	NA	NA	NA	NA	NA	NA	NA	NA	-0.321928	4.06609
CGGA_1647	Oligodendroglioma	II	NA	60.8	0	NA	CGGA	NA	NA	NA	NA	NA	NA	NA	NA	NA	NA	NA	NA	1.1635	3.6241
CGGA_1648	Anaplastic Oligoastrocytoma	III	NA	57.4	0	NA	CGGA	NA	NA	NA	NA	NA	NA	NA	NA	NA	NA	NA	NA	0.823749	3.47379
CGGA_1649	Oligodendroglioma	II	IDHmut-codel	60.6	0	NA	CGGA	NA	NA	NA	NA	NA	NA	NA	NA	NA	NA	NA	NA	0.731183	3.66221
CGGA_165	Astrocytoma	II	NA	6	0	NA	CGGA	NA	NA	NA	NA	NA	NA	NA	NA	NA	NA	NA	NA	0.432959	3.52482
CGGA_1650	GBM	IV	IDHmut-non-codel	42.2	1	NonAltered	CGGA	NA	NA	NA	NA	NA	NA	NA	NA	NA	NA	NA	NA	-0.184425	4.17632
CGGA_1651	Astrocytoma	II	IDHmut-non-codel	27.7	1	NA	CGGA	NA	NA	NA	NA	NA	NA	NA	NA	NA	NA	NA	NA	-0.234465	2.60644
CGGA_1653	Oligoastrocytoma	II	NA	60.4	0	NA	CGGA	NA	NA	NA	NA	NA	NA	NA	NA	NA	NA	NA	NA	0.238787	3.46728
CGGA_1654	GBM	IV	IDHwt	NA	NA	NA	CGGA	3084.89	2031.54	4986.16	3400.56	1471.89	0.983017	1	1	0.445554	0.354645	PN	DEV	2.70929	3.38267
CGGA_1655	Astrocytoma	II	IDHmut-non-codel	39.7	0	NA	CGGA	NA	NA	NA	NA	NA	NA	NA	NA	NA	NA	NA	NA	-0.0144996	3.03034
CGGA_1656	GBM	IV	IDHwt	4.9	1	NonAltered	CGGA	NA	NA	NA	NA	NA	NA	NA	NA	NA	NA	NA	NA	3.0635	3.31034
CGGA_1657	Anaplastic Oligoastrocytoma	III	NA	60.3	0	NA	CGGA	NA	NA	NA	NA	NA	NA	NA	NA	NA	NA	NA	NA	-0.415037	2.15381
CGGA_1658	GBM	IV	IDHwt	51.7	1	NA	CGGA	NA	NA	NA	NA	NA	NA	NA	NA	NA	NA	NA	NA	2.06005	1.87184
CGGA_1659	GBM	IV	IDHwt	12.7	1	NA	CGGA	NA	NA	NA	NA	NA	NA	NA	NA	NA	NA	NA	NA	3.12598	2.86987
CGGA_1660	Astrocytoma	II	NA	14.2	0	NA	CGGA	NA	NA	NA	NA	NA	NA	NA	NA	NA	NA	NA	NA	2.03914	2.82579
CGGA_1661	Anaplastic Astrocytoma	III	NA	60.1	0	NA	CGGA	NA	NA	NA	NA	NA	NA	NA	NA	NA	NA	NA	NA	1.09761	3.47768
CGGA_1662	Oligodendroglioma	II	IDHmut-codel	49.1	0	NA	CGGA	NA	NA	NA	NA	NA	NA	NA	NA	NA	NA	NA	NA	0.250962	2.28983
CGGA_1663	GBM	IV	IDHwt	9.5	1	NA	CGGA	NA	NA	NA	NA	NA	NA	NA	NA	NA	NA	NA	NA	2.57773	2.0036
CGGA_1664	Oligodendroglioma	II	IDHmut-non-codel	50.2	1	NA	CGGA	NA	NA	NA	NA	NA	NA	NA	NA	NA	NA	NA	NA	-0.395929	2.47508
CGGA_1666	GBM	IV	NA	8.2	1	NA	CGGA	NA	NA	NA	NA	NA	NA	NA	NA	NA	NA	NA	NA	0.367371	3.26604
CGGA_1667	Anaplastic Oligodendrolgioma	III	IDHmut-codel	59.2	0	NonAltered	CGGA	NA	NA	NA	NA	NA	NA	NA	NA	NA	NA	NA	NA	0.0285692	4.31397
CGGA_1669	Anaplastic Astrocytoma	III	IDHwt	4.6	1	NA	CGGA	3892.78	2065.63	6857.44	791.826	1739.91	0.000999001	1	0.004995	1	0.193806	CL	DEV	0.505891	3.58976
CGGA_1670	Anaplastic Astrocytoma	III	IDHwt	12	1	NA	CGGA	NA	NA	NA	NA	NA	NA	NA	NA	NA	NA	NA	NA	0.604071	3.23573
CGGA_1671	Anaplastic Astrocytoma	III	IDHmut-non-codel	58.8	0	NA	CGGA	NA	NA	NA	NA	NA	NA	NA	NA	NA	NA	NA	NA	1.1635	2.75916
CGGA_1672	Anaplastic Oligoastrocytoma	III	NA	NA	NA	NA	CGGA	NA	NA	NA	NA	NA	NA	NA	NA	NA	NA	NA	NA	0.263034	1.73552
CGGA_1673	Astrocytoma	II	IDHmut-non-codel	58.6	0	NA	CGGA	NA	NA	NA	NA	NA	NA	NA	NA	NA	NA	NA	NA	-0.643856	3.20163
CGGA_1675	Anaplastic Astrocytoma	III	IDHmut-non-codel	58.3	0	NA	CGGA	NA	NA	NA	NA	NA	NA	NA	NA	NA	NA	NA	NA	1.12433	3.22651
CGGA_1677	Astrocytoma	II	NA	NA	NA	NA	CGGA	NA	NA	NA	NA	NA	NA	NA	NA	NA	NA	NA	NA	1.59932	4.83996
CGGA_1678	GBM	IV	NA	21.6	1	NA	CGGA	NA	NA	NA	NA	NA	NA	NA	NA	NA	NA	NA	NA	0.62293	2.83996
CGGA_1679	Anaplastic Oligodendrolgioma	III	IDHmut-codel	58.1	0	NA	CGGA	NA	NA	NA	NA	NA	NA	NA	NA	NA	NA	NA	NA	-0.494109	2.02148
CGGA_1680	Anaplastic Astrocytoma	III	IDHmut-non-codel	19.6	1	NA	CGGA	NA	NA	NA	NA	NA	NA	NA	NA	NA	NA	NA	NA	0.925999	2.92029
CGGA_1681	GBM	IV	NA	11.4	1	NA	CGGA	NA	NA	NA	NA	NA	NA	NA	NA	NA	NA	NA	NA	3.42223	2.42761
CGGA_1682	GBM	IV	IDHwt	11.3	1	NA	CGGA	NA	NA	NA	NA	NA	NA	NA	NA	NA	NA	NA	NA	1.03562	4.2426
CGGA_1684	GBM	IV	IDHwt	NA	NA	NA	CGGA	2783.55	3100.55	4865.77	4936.7	1777.59	1	0.000999001	1	0.000999001	0.176823	MES	INJ	1.54597	2.32193
CGGA_1685	Anaplastic Astrocytoma	III	IDHmut-non-codel	7.4	1	NA	CGGA	NA	NA	NA	NA	NA	NA	NA	NA	NA	NA	NA	NA	1.90689	4.67243
CGGA_1686	Anaplastic Astrocytoma	III	IDHwt	24.5	1	NA	CGGA	3748.3	1510.59	4326.57	507.445	4151.05	0.000999001	1	1	1	0.000999001	PN	DEV	-0.577767	2.84599
CGGA_1687	GBM	IV	IDHwt	57.1	0	NA	CGGA	2028.53	3794.8	5547.88	5713.71	-1984.85	1	0.000999001	0.955045	0.000999001	1	MES	INJ	5.12184	2.74631
CGGA_1688	Anaplastic Astrocytoma	III	IDHwt	1.7	1	NA	CGGA	NA	NA	NA	NA	NA	NA	NA	NA	NA	NA	NA	NA	1.53605	2.57046
CGGA_1689	Astrocytoma	II	IDHmut-non-codel	57.1	0	NA	CGGA	NA	NA	NA	NA	NA	NA	NA	NA	NA	NA	NA	NA	0.0703893	2.70487
CGGA_1690	GBM	IV	IDHwt	19.5	1	NA	CGGA	3362.3	2784.96	4755.13	4601.37	3917.4	0.000999001	0.965035	1	0.004995	0.000999001	PN	DEV	3.14568	2.5509
CGGA_1693	Anaplastic Oligodendrolgioma	III	NA	17	1	NA	CGGA	NA	NA	NA	NA	NA	NA	NA	NA	NA	NA	NA	NA	0.659925	2.98185
CGGA_1694	GBM	IV	IDHwt	20.5	1	NA	CGGA	2711.37	2606.07	5288.26	3597.43	-422.329	1	1	0.998002	0.285714	0.999001	MES	NA	1.60881	2.62994
CGGA_1695	Anaplastic Astrocytoma	III	IDHmut-non-codel	56.4	0	NA	CGGA	NA	NA	NA	NA	NA	NA	NA	NA	NA	NA	NA	NA	-0.0144996	3.31615
CGGA_1696	Anaplastic Astrocytoma	III	NA	39.6	0	NA	CGGA	NA	NA	NA	NA	NA	NA	NA	NA	NA	NA	NA	NA	-0.395929	2.63923
CGGA_1697	GBM	IV	IDHwt	2.9	1	NA	CGGA	NA	NA	NA	NA	NA	NA	NA	NA	NA	NA	NA	NA	0.863938	2.55827
CGGA_1698	GBM	IV	IDHwt	12.8	1	NA	CGGA	2961.94	2698.75	5630.23	4289.02	816.653	1	1	0.927073	0.036963	0.803197	MES	NA	4.34979	2.81147
CGGA_1699	GBM	IV	NA	56.2	0	NonAltered	CGGA	NA	NA	NA	NA	NA	NA	NA	NA	NA	NA	NA	NA	-0.120294	3.69265
CGGA_1700	Anaplastic Oligodendrolgioma	III	IDHmut-codel	55.8	0	NA	CGGA	NA	NA	NA	NA	NA	NA	NA	NA	NA	NA	NA	NA	0.887525	2.23879
CGGA_1701	Anaplastic Oligodendrolgioma	III	IDHmut-codel	55.8	0	NA	CGGA	NA	NA	NA	NA	NA	NA	NA	NA	NA	NA	NA	NA	-0.304006	3.21568
CGGA_1702	GBM	IV	IDHwt	5.5	1	NA	CGGA	NA	NA	NA	NA	NA	NA	NA	NA	NA	NA	NA	NA	-0.0740006	4.86344
CGGA_1703	Astrocytoma	II	IDHmut-non-codel	52.3	0	NA	CGGA	NA	NA	NA	NA	NA	NA	NA	NA	NA	NA	NA	NA	-0.0588937	2.64386
CGGA_1704	Astrocytoma	II	IDHwt	55.4	0	NA	CGGA	3543.69	1561.12	4478.08	613.593	2514.92	0.000999001	1	1	1	0.013986	PN	DEV	0.669027	3.02503
CGGA_1706	GBM	IV	IDHwt	55.5	0	NA	CGGA	1729.55	3908.32	3830.16	7909.84	-398.773	1	0.000999001	1	0.000999001	0.999001	MES	INJ	4.69042	1.46467
CGGA_1708	GBM	IV	IDHwt	36.9	1	NA	CGGA	2440.37	2798.84	4518.29	4999	-1003.12	1	0.927073	1	0.000999001	1	MES	INJ	3.3799	2.89142
CGGA_1709	GBM	IV	IDHwt	13.6	1	NA	CGGA	3047.44	2746.27	5470.14	2768.76	872.056	0.999001	0.995005	0.973027	0.859141	0.77023	PN	INJ	1.89142	3.09592
CGGA_171	Oligodendroglioma	II	IDHmut-codel	NA	NA	NA	CGGA	NA	NA	NA	NA	NA	NA	NA	NA	NA	NA	NA	NA	0.286881	3.28392
CGGA_1713	GBM	IV	IDHwt	10.9	1	NA	CGGA	3869.06	1787.24	4981.09	1459.81	4682.1	0.000999001	1	1	1	0.000999001	PN	DEV	0.555816	3.35755
CGGA_1714	Anaplastic Oligoastrocytoma	III	NA	54.4	0	NA	CGGA	NA	NA	NA	NA	NA	NA	NA	NA	NA	NA	NA	NA	0.722466	2.42223
CGGA_1715	Oligodendroglioma	II	IDHwt	54.3	0	NA	CGGA	3936.18	2251.45	6257.75	1775.8	3232.15	0.000999001	1	0.26973	0.999001	0.000999001	PN	DEV	1.09085	3.24793
CGGA_1716	Anaplastic Astrocytoma	III	IDHmut-non-codel	31.3	1	NA	CGGA	NA	NA	NA	NA	NA	NA	NA	NA	NA	NA	NA	NA	1.37295	4.14731
CGGA_1718	Anaplastic Astrocytoma	III	IDHmut-non-codel	53.1	0	NA	CGGA	NA	NA	NA	NA	NA	NA	NA	NA	NA	NA	NA	NA	0.189034	2.93546
CGGA_1720	Astrocytoma	II	IDHmut-non-codel	53.1	0	NonAltered	CGGA	NA	NA	NA	NA	NA	NA	NA	NA	NA	NA	NA	NA	-0.0740006	5.02547
CGGA_1721	Anaplastic Oligodendrolgioma	III	NA	53.1	0	NA	CGGA	NA	NA	NA	NA	NA	NA	NA	NA	NA	NA	NA	NA	0.321928	2.30743
CGGA_1722	GBM	IV	NA	11.5	1	Altered	CGGA	NA	NA	NA	NA	NA	NA	NA	NA	NA	NA	NA	NA	0.176323	2.31615
CGGA_1723	Anaplastic Oligodendrolgioma	III	IDHmut-codel	52.8	0	NA	CGGA	NA	NA	NA	NA	NA	NA	NA	NA	NA	NA	NA	NA	-0.494109	2.64847
CGGA_1725	Anaplastic Oligodendrolgioma	III	IDHmut-codel	52.8	0	NA	CGGA	NA	NA	NA	NA	NA	NA	NA	NA	NA	NA	NA	NA	0.773996	3.0993
CGGA_1727	GBM	IV	IDHmut-non-codel	52.6	0	NA	CGGA	NA	NA	NA	NA	NA	NA	NA	NA	NA	NA	NA	NA	0.286881	2.90689
CGGA_1728	GBM	IV	IDHmut-non-codel	30.1	1	NA	CGGA	NA	NA	NA	NA	NA	NA	NA	NA	NA	NA	NA	NA	0.948601	2.92029
CGGA_1729	GBM	IV	IDHwt	8	1	NA	CGGA	NA	NA	NA	NA	NA	NA	NA	NA	NA	NA	NA	NA	2.16993	2.23266
CGGA_1731	Anaplastic Astrocytoma	III	IDHmut-non-codel	52.5	0	NA	CGGA	NA	NA	NA	NA	NA	NA	NA	NA	NA	NA	NA	NA	0.9855	2.86592
CGGA_1735	GBM	IV	IDHwt	26.7	1	NA	CGGA	3955.73	2179.67	6241.47	-694.008	3044.28	0.000999001	1	0.295704	1	0.001998	PN	DEV	-0.68966	4.74308
CGGA_1736	GBM	IV	IDHwt	30.8	1	NA	CGGA	2586.6	3149.1	6746.1	3635.1	-732.758	1	0.000999001	0.018981	0.255744	1	CL	INJ	3.56194	2.79701
CGGA_1737	Anaplastic Oligodendrolgioma	III	IDHmut-codel	51.7	0	NA	CGGA	NA	NA	NA	NA	NA	NA	NA	NA	NA	NA	NA	NA	0.189034	2.75275
CGGA_1738	Anaplastic Astrocytoma	III	IDHwt	15.4	1	NA	CGGA	3699.98	1947.31	6444.34	64.8172	2244.33	0.000999001	1	0.106893	1	0.038961	PN	DEV	0.650765	3.06178
CGGA_1739	Anaplastic Astrocytoma	III	IDHmut-non-codel	16.9	1	NA	CGGA	NA	NA	NA	NA	NA	NA	NA	NA	NA	NA	NA	NA	1.16993	2.65306
CGGA_1740	GBM	IV	IDHwt	11.9	1	NA	CGGA	4151.35	1373.73	5185.67	-615.821	4533.23	0.000999001	1	1	1	0.000999001	PN	DEV	0.0285692	3.01257
CGGA_1743	Anaplastic Astrocytoma	III	IDHmut-non-codel	44.7	1	NA	CGGA	NA	NA	NA	NA	NA	NA	NA	NA	NA	NA	NA	NA	0.0840643	2.53605
CGGA_1744	GBM	IV	NA	51.2	0	NA	CGGA	NA	NA	NA	NA	NA	NA	NA	NA	NA	NA	NA	NA	4.24489	3.13258
CGGA_1745	Anaplastic Oligoastrocytoma	III	NA	50.9	0	NA	CGGA	NA	NA	NA	NA	NA	NA	NA	NA	NA	NA	NA	NA	-0.761213	3.30159
CGGA_1747	Anaplastic Oligoastrocytoma	III	NA	9.6	1	NA	CGGA	NA	NA	NA	NA	NA	NA	NA	NA	NA	NA	NA	NA	0.765535	3.52982
CGGA_1749	GBM	IV	IDHwt	13.2	1	NA	CGGA	4009.19	2251.32	7306.51	1893.68	1875.83	0.000999001	1	0.000999001	0.996004	0.136863	CL	DEV	2.14078	3.56682
CGGA_1750	GBM	IV	IDHwt	8.2	1	NA	CGGA	3734.47	2165.35	5824.41	-111.971	2692.96	0.000999001	1	0.784216	1	0.00799201	PN	DEV	0.669027	2.45681
CGGA_1758	GBM	IV	IDHwt	13.6	1	NA	CGGA	3850.27	2069.47	6854.61	1347.1	1404.79	0.000999001	1	0.004995	1	0.398601	CL	DEV	1.4489	3.92884
CGGA_1760	Astrocytoma	II	IDHwt	15.1	1	NA	CGGA	NA	NA	NA	NA	NA	NA	NA	NA	NA	NA	NA	NA	2.58256	2.67582
CGGA_1764	GBM	IV	IDHmut-non-codel	23.3	1	NA	CGGA	NA	NA	NA	NA	NA	NA	NA	NA	NA	NA	NA	NA	0.356144	2.89724
CGGA_1767	GBM	IV	NA	2.8	1	NA	CGGA	NA	NA	NA	NA	NA	NA	NA	NA	NA	NA	NA	NA	-0.251539	2.74416
CGGA_1769	GBM	IV	IDHwt	48.5	0	NA	CGGA	3993.14	2579.03	6311.11	-574.377	2938.04	0.000999001	1	0.218781	1	0.003996	PN	DEV	-0.168123	4.0365
CGGA_1770	GBM	IV	IDHmut-non-codel	8.8	1	NA	CGGA	NA	NA	NA	NA	NA	NA	NA	NA	NA	NA	NA	NA	1.02148	3.55213
CGGA_1771	Anaplastic Astrocytoma	III	IDHmut-non-codel	35.1	1	NA	CGGA	NA	NA	NA	NA	NA	NA	NA	NA	NA	NA	NA	NA	0.137504	3.38128
CGGA_1773	GBM	IV	IDHwt	3.4	1	NA	CGGA	NA	NA	NA	NA	NA	NA	NA	NA	NA	NA	NA	NA	4.37365	2.82782
CGGA_1776	GBM	IV	IDHwt	8.5	1	NA	CGGA	NA	NA	NA	NA	NA	NA	NA	NA	NA	NA	NA	NA	2.5656	3.17792
CGGA_1780	GBM	IV	NA	47.5	0	NonAltered	CGGA	NA	NA	NA	NA	NA	NA	NA	NA	NA	NA	NA	NA	-0.736966	3.27947
CGGA_1785	GBM	IV	IDHmut-non-codel	10.8	1	NA	CGGA	NA	NA	NA	NA	NA	NA	NA	NA	NA	NA	NA	NA	0.536053	2.84398
CGGA_1786	Anaplastic Oligodendrolgioma	III	IDHmut-codel	47.2	0	NA	CGGA	NA	NA	NA	NA	NA	NA	NA	NA	NA	NA	NA	NA	-0.0892673	2.86592
CGGA_1791	Anaplastic Astrocytoma	III	NA	28.1	1	NA	CGGA	NA	NA	NA	NA	NA	NA	NA	NA	NA	NA	NA	NA	-0.862496	2.87578
CGGA_1807	GBM	IV	IDHwt	8.1	1	NonAltered	CGGA	3687.96	1875.51	4505.65	1924.77	5168.51	0.000999001	1	1	0.996004	0.000999001	PN	DEV	1.04963	3.60881
CGGA_1809	Anaplastic Oligodendrolgioma	III	IDHwt	11.3	1	Altered	CGGA	3739.31	1930.03	4557.96	114.916	5593.19	0.000999001	1	1	1	0.000999001	PN	DEV	-0.217591	2.22033
CGGA_1811	GBM	IV	IDHwt	10	1	NA	CGGA	NA	NA	NA	NA	NA	NA	NA	NA	NA	NA	NA	NA	2.79077	2.52607
CGGA_1812	GBM	IV	IDHwt	25.6	1	Altered	CGGA	3304.72	2849.05	6965.84	3474.42	890.684	0.00699301	0.634366	0.001998	0.38961	0.762238	CL	DEV	4.22188	1.75275
CGGA_1814	GBM	IV	IDHwt	7.3	1	Altered	CGGA	NA	NA	NA	NA	NA	NA	NA	NA	NA	NA	NA	NA	2.40327	1.94111
CGGA_1815	GBM	IV	IDHwt	6.1	1	NA	CGGA	NA	NA	NA	NA	NA	NA	NA	NA	NA	NA	NA	NA	3.03386	3.23419
CGGA_1817	GBM	IV	IDHwt	13.1	1	NA	CGGA	3071.65	2540	7046.05	1956	-569.133	0.995005	1	0.000999001	0.994006	1	CL	DEV	1.33342	2.65306
CGGA_1819	GBM	IV	IDHwt	43.5	0	NA	CGGA	3113.99	2408.79	4948.89	3150.04	2324.46	0.943057	1	1	0.632368	0.02997	PN	DEV	3.8166	3.0197
CGGA_1820	GBM	IV	IDHwt	2.5	1	NA	CGGA	NA	NA	NA	NA	NA	NA	NA	NA	NA	NA	NA	NA	1.82782	2.82985
CGGA_1826	GBM	IV	IDHwt	1.4	1	NonAltered	CGGA	3585.33	2492.41	7538.63	1245.78	-308.166	0.000999001	1	0.000999001	1	0.998002	CL	DEV	0.613532	3.3799
CGGA_1829	Astrocytoma	II	IDHwt	26.3	0	NonAltered	CGGA	3643.97	2535.84	5856.34	817.223	2240.24	0.000999001	1	0.753247	1	0.03996	PN	DEV	0.722466	2.46728
CGGA_1833	GBM	IV	IDHwt	16.2	1	NonAltered	CGGA	3519.83	2708.71	7120.35	3761.76	1141.45	0.000999001	1	0.000999001	0.194805	0.603397	CL	DEV	2.70044	3.32769
CGGA_1840	GBM	IV	IDHwt	38.8	0	NonAltered	CGGA	3977.1	2412.48	5650.36	1303.42	4097.93	0.000999001	1	0.916084	1	0.000999001	PN	DEV	0.298658	2.95233
CGGA_1850	Astrocytoma	II	IDHmut-non-codel	24.7	0	NonAltered	CGGA	NA	NA	NA	NA	NA	NA	NA	NA	NA	NA	NA	NA	0.0840643	2.79701
CGGA_1854	Anaplastic Astrocytoma	III	IDHmut-non-codel	41	0	NA	CGGA	NA	NA	NA	NA	NA	NA	NA	NA	NA	NA	NA	NA	0.669027	2.70266
CGGA_1857	GBM	IV	IDHwt	5.2	1	NA	CGGA	NA	NA	NA	NA	NA	NA	NA	NA	NA	NA	NA	NA	1.4957	1.91073
CGGA_1862	Anaplastic Astrocytoma	III	IDHwt	3.6	1	NonAltered	CGGA	3563.32	2428.88	8085.46	92.3203	222.945	0.000999001	1	0.000999001	1	0.969031	CL	DEV	2.81147	4.15947
CGGA_1863	Anaplastic Oligodendrolgioma	III	IDHmut-codel	39.9	0	NA	CGGA	NA	NA	NA	NA	NA	NA	NA	NA	NA	NA	NA	NA	-0.454032	2.60407
CGGA_1865	GBM	IV	IDHwt	2.9	1	NA	CGGA	NA	NA	NA	NA	NA	NA	NA	NA	NA	NA	NA	NA	2.09761	3.41414
CGGA_1866	GBM	IV	IDHwt	4.2	1	NA	CGGA	3294.66	2376.34	6094.13	2143.73	451.972	0.00999001	1	0.488511	0.985015	0.944056	CL	DEV	2.50335	3.45154
CGGA_1870	GBM	IV	IDHmut-codel	38.7	0	NA	CGGA	NA	NA	NA	NA	NA	NA	NA	NA	NA	NA	NA	NA	-0.0740006	3.13914
CGGA_1875	Astrocytoma	II	IDHwt	38.7	0	NA	CGGA	2876.41	2624.98	4091.1	3475.55	1795.85	1	1	1	0.38961	0.171828	PN	NA	4.33128	3.08746
CGGA_1877	Anaplastic Oligodendrolgioma	III	IDHmut-codel	NA	NA	NA	CGGA	NA	NA	NA	NA	NA	NA	NA	NA	NA	NA	NA	NA	0.0143553	3.0197
CGGA_1880	Anaplastic Astrocytoma	III	IDHmut-non-codel	38.4	0	NA	CGGA	NA	NA	NA	NA	NA	NA	NA	NA	NA	NA	NA	NA	0.378512	3.03034
CGGA_1882	Anaplastic Oligodendrolgioma	III	IDHmut-codel	38	0	NA	CGGA	NA	NA	NA	NA	NA	NA	NA	NA	NA	NA	NA	NA	0.495695	2.73118
CGGA_1886	GBM	IV	IDHwt	11.1	1	NA	CGGA	NA	NA	NA	NA	NA	NA	NA	NA	NA	NA	NA	NA	1.14405	3.16832
CGGA_1899	GBM	IV	IDHwt	5.8	1	NA	CGGA	NA	NA	NA	NA	NA	NA	NA	NA	NA	NA	NA	NA	1.65992	2.78869
CGGA_1901	GBM	IV	IDHwt	17.8	1	NonAltered	CGGA	2167.83	3316.06	5098.09	6271.7	-917.84	1	0.000999001	1	0.000999001	1	MES	INJ	2.9542	2.09761
CGGA_1902	Astrocytoma	II	IDHmut-non-codel	36.3	0	NA	CGGA	NA	NA	NA	NA	NA	NA	NA	NA	NA	NA	NA	NA	1.43829	2.89724
CGGA_1903	Anaplastic Oligoastrocytoma	III	NA	36.1	0	NA	CGGA	NA	NA	NA	NA	NA	NA	NA	NA	NA	NA	NA	NA	1.70929	5.0027
CGGA_1906	Anaplastic Astrocytoma	III	IDHmut-non-codel	34.7	1	NonAltered	CGGA	NA	NA	NA	NA	NA	NA	NA	NA	NA	NA	NA	NA	1.28688	2.38405
CGGA_1908	GBM	IV	IDHwt	9.8	1	NA	CGGA	NA	NA	NA	NA	NA	NA	NA	NA	NA	NA	NA	NA	2.56071	2.47768
CGGA_1911	GBM	IV	IDHwt	35.3	0	NA	CGGA	NA	NA	NA	NA	NA	NA	NA	NA	NA	NA	NA	NA	3.94673	4.14486
CGGA_1912	GBM	IV	NA	16.7	1	NA	CGGA	NA	NA	NA	NA	NA	NA	NA	NA	NA	NA	NA	NA	2.60407	2.68706
CGGA_1916	GBM	IV	IDHmut-non-codel	NA	0	NA	CGGA	NA	NA	NA	NA	NA	NA	NA	NA	NA	NA	NA	NA	1.53107	3.16993
CGGA_1939	Astrocytoma	II	NA	NA	NA	NA	CGGA	NA	NA	NA	NA	NA	NA	NA	NA	NA	NA	NA	NA	1.14405	4.05658
CGGA_194	Anaplastic Oligodendrolgioma	III	IDHmut-codel	75.7	1	NA	CGGA	NA	NA	NA	NA	NA	NA	NA	NA	NA	NA	NA	NA	-0.251539	3.08576
CGGA_1946	GBM	IV	IDHwt	4.7	1	NA	CGGA	NA	NA	NA	NA	NA	NA	NA	NA	NA	NA	NA	NA	3.93452	2.18903
CGGA_1953	GBM	IV	IDHwt	2.4	1	NA	CGGA	NA	NA	NA	NA	NA	NA	NA	NA	NA	NA	NA	NA	2.21101	2.45418
CGGA_1955	GBM	IV	NA	15	1	NA	CGGA	NA	NA	NA	NA	NA	NA	NA	NA	NA	NA	NA	NA	0.333424	2.70708
CGGA_1972	GBM	IV	IDHwt	30.1	0	NonAltered	CGGA	NA	NA	NA	NA	NA	NA	NA	NA	NA	NA	NA	NA	3.16027	2.07039
CGGA_1976	GBM	IV	IDHwt	2.4	1	NA	CGGA	NA	NA	NA	NA	NA	NA	NA	NA	NA	NA	NA	NA	3.25399	2.61117
CGGA_1985	GBM	IV	IDHmut-non-codel	12.5	1	NonAltered	CGGA	NA	NA	NA	NA	NA	NA	NA	NA	NA	NA	NA	NA	1.18269	2.99458
CGGA_1994	Anaplastic Oligodendrolgioma	III	IDHmut-non-codel	28.3	0	NonAltered	CGGA	NA	NA	NA	NA	NA	NA	NA	NA	NA	NA	NA	NA	-0.0144996	3.15056
CGGA_2002	Astrocytoma	II	IDHmut-non-codel	18.8	1	NonAltered	CGGA	NA	NA	NA	NA	NA	NA	NA	NA	NA	NA	NA	NA	-0.200913	2.90304
CGGA_2003	GBM	IV	IDHmut-non-codel	27.2	0	NonAltered	CGGA	NA	NA	NA	NA	NA	NA	NA	NA	NA	NA	NA	NA	0.831877	2.38128
CGGA_2006	Anaplastic Astrocytoma	III	IDHmut-non-codel	20.6	1	NonAltered	CGGA	NA	NA	NA	NA	NA	NA	NA	NA	NA	NA	NA	NA	0.799087	3.54844
CGGA_2008	GBM	IV	IDHwt	1.4	1	NonAltered	CGGA	NA	NA	NA	NA	NA	NA	NA	NA	NA	NA	NA	NA	2.04963	2.0635
CGGA_2013	Astrocytoma	II	IDHmut-codel	4.6	1	NonAltered	CGGA	NA	NA	NA	NA	NA	NA	NA	NA	NA	NA	NA	NA	1.28688	2.34767
CGGA_2024	GBM	IV	IDHwt	10.8	1	NonAltered	CGGA	NA	NA	NA	NA	NA	NA	NA	NA	NA	NA	NA	NA	-0.234465	2.98003
CGGA_2038	GBM	IV	IDHmut-non-codel	NA	1	NonAltered	CGGA	NA	NA	NA	NA	NA	NA	NA	NA	NA	NA	NA	NA	1.86394	3.6427
CGGA_2039	GBM	IV	IDHwt	NA	NA	NA	CGGA	NA	NA	NA	NA	NA	NA	NA	NA	NA	NA	NA	NA	0.650765	2.61353
CGGA_2046	Anaplastic Astrocytoma	III	IDHmut-non-codel	8.3	1	NonAltered	CGGA	NA	NA	NA	NA	NA	NA	NA	NA	NA	NA	NA	NA	1.5509	3.03914
CGGA_2047	GBM	IV	IDHwt	19.7	1	NonAltered	CGGA	NA	NA	NA	NA	NA	NA	NA	NA	NA	NA	NA	NA	1.08406	3.77505
CGGA_2053	GBM	IV	NA	21	0	NonAltered	CGGA	NA	NA	NA	NA	NA	NA	NA	NA	NA	NA	NA	NA	1.39506	2.25096
CGGA_2056	GBM	IV	IDHmut-non-codel	20.6	0	NA	CGGA	NA	NA	NA	NA	NA	NA	NA	NA	NA	NA	NA	NA	6.17732	1.41143
CGGA_2062	GBM	IV	IDHmut-non-codel	1.3	1	NonAltered	CGGA	NA	NA	NA	NA	NA	NA	NA	NA	NA	NA	NA	NA	2.69377	2.84197
CGGA_2075	GBM	IV	IDHwt	8.7	1	Altered	CGGA	NA	NA	NA	NA	NA	NA	NA	NA	NA	NA	NA	NA	5.83264	1
CGGA_2078	GBM	IV	IDHwt	9.2	1	NA	CGGA	NA	NA	NA	NA	NA	NA	NA	NA	NA	NA	NA	NA	3.25852	2.95977
CGGA_2079	Anaplastic Oligodendrolgioma	III	IDHmut-codel	18.8	0	NA	CGGA	NA	NA	NA	NA	NA	NA	NA	NA	NA	NA	NA	NA	0.238787	4.34837
CGGA_2081	Anaplastic Oligodendrolgioma	III	IDHmut-codel	18.8	0	NA	CGGA	NA	NA	NA	NA	NA	NA	NA	NA	NA	NA	NA	NA	-0.577767	3.36597
CGGA_2082	GBM	IV	IDHwt	NA	NA	NA	CGGA	NA	NA	NA	NA	NA	NA	NA	NA	NA	NA	NA	NA	3.74524	2.27202
CGGA_2088	GBM	IV	IDHwt	NA	NA	NonAltered	CGGA	NA	NA	NA	NA	NA	NA	NA	NA	NA	NA	NA	NA	4.16672	2.86987
CGGA_2106	GBM	IV	IDHmut-codel	16.5	0	NonAltered	CGGA	NA	NA	NA	NA	NA	NA	NA	NA	NA	NA	NA	NA	0.992768	2.11437
CGGA_2115	GBM	IV	IDHwt	5.6	1	NonAltered	CGGA	NA	NA	NA	NA	NA	NA	NA	NA	NA	NA	NA	NA	0.925999	1.88753
CGGA_2121	Astrocytoma	II	IDHmut-non-codel	11.4	1	NA	CGGA	NA	NA	NA	NA	NA	NA	NA	NA	NA	NA	NA	NA	2.71809	2.35332
CGGA_2129	Anaplastic Astrocytoma	III	IDHmut-non-codel	14.4	0	NonAltered	CGGA	NA	NA	NA	NA	NA	NA	NA	NA	NA	NA	NA	NA	0.124328	3.25701
CGGA_235	Oligodendroglioma	II	IDHmut-codel	76.9	1	NA	CGGA	NA	NA	NA	NA	NA	NA	NA	NA	NA	NA	NA	NA	-0.736966	4.33628
CGGA_236	Oligodendroglioma	II	IDHmut-codel	23.2	0	NA	CGGA	NA	NA	NA	NA	NA	NA	NA	NA	NA	NA	NA	NA	0.584963	4.66903
CGGA_241	Astrocytoma	II	IDHmut-non-codel	147.2	0	NA	CGGA	NA	NA	NA	NA	NA	NA	NA	NA	NA	NA	NA	NA	1.68257	3.95884
CGGA_243	Oligodendroglioma	II	IDHmut-codel	97.9	0	NA	CGGA	NA	NA	NA	NA	NA	NA	NA	NA	NA	NA	NA	NA	-0.340075	4.765
CGGA_245	Anaplastic Astrocytoma	III	IDHmut-non-codel	10.5	1	NA	CGGA	NA	NA	NA	NA	NA	NA	NA	NA	NA	NA	NA	NA	1.66448	4.08831
CGGA_247	Anaplastic Astrocytoma	III	IDHmut-non-codel	20	1	NA	CGGA	NA	NA	NA	NA	NA	NA	NA	NA	NA	NA	NA	NA	0.613532	5.37295
CGGA_251	Astrocytoma	II	IDHmut-non-codel	42.7	0	NA	CGGA	NA	NA	NA	NA	NA	NA	NA	NA	NA	NA	NA	NA	1.61353	4.10266
CGGA_252	Astrocytoma	II	IDHmut-non-codel	5.4	0	NA	CGGA	NA	NA	NA	NA	NA	NA	NA	NA	NA	NA	NA	NA	0.238787	4.21956
CGGA_254	Oligodendroglioma	II	IDHmut-codel	146.6	0	NA	CGGA	NA	NA	NA	NA	NA	NA	NA	NA	NA	NA	NA	NA	-0.415037	4.33271
CGGA_256	Astrocytoma	II	IDHmut-non-codel	5.2	0	NA	CGGA	NA	NA	NA	NA	NA	NA	NA	NA	NA	NA	NA	NA	1.67356	4.67186
CGGA_261	Astrocytoma	II	IDHmut-non-codel	135.8	0	NA	CGGA	NA	NA	NA	NA	NA	NA	NA	NA	NA	NA	NA	NA	0.124328	3.851
CGGA_265	Astrocytoma	II	IDHmut-non-codel	130.2	0	NA	CGGA	NA	NA	NA	NA	NA	NA	NA	NA	NA	NA	NA	NA	1.852	2.98368
CGGA_267	Astrocytoma	II	IDHmut-non-codel	45.2	1	NA	CGGA	NA	NA	NA	NA	NA	NA	NA	NA	NA	NA	NA	NA	-0.0740006	4.35191
CGGA_269	Astrocytoma	II	IDHwt	96.4	0	NA	CGGA	2919.12	3748.37	7072.02	4883.25	237.127	1	0.000999001	0.000999001	0.001998	0.969031	CL	INJ	2.55827	4.04089
CGGA_272	GBM	IV	IDHwt	7.1	1	NA	CGGA	NA	NA	NA	NA	NA	NA	NA	NA	NA	NA	NA	NA	2.83592	2.8953
CGGA_273	Astrocytoma	II	IDHmut-non-codel	86.6	1	NA	CGGA	NA	NA	NA	NA	NA	NA	NA	NA	NA	NA	NA	NA	1.45418	4.22497
CGGA_274	GBM	IV	IDHwt	20.1	0	NA	CGGA	3074.96	3424.26	6394.98	6164.09	1258.01	0.99001	0.000999001	0.145854	0.000999001	0.514486	MES	INJ	2.06005	3.40054
CGGA_276	Oligodendroglioma	II	IDHmut-non-codel	17.4	0	NA	CGGA	NA	NA	NA	NA	NA	NA	NA	NA	NA	NA	NA	NA	0.0840643	4.25172
CGGA_277	Anaplastic Oligodendrolgioma	III	NA	134.4	0	NA	CGGA	NA	NA	NA	NA	NA	NA	NA	NA	NA	NA	NA	NA	0.485427	2.96901
CGGA_279	Anaplastic Astrocytoma	III	IDHmut-non-codel	43.2	1	NA	CGGA	NA	NA	NA	NA	NA	NA	NA	NA	NA	NA	NA	NA	2.16027	3.22805
CGGA_28	Astrocytoma	II	IDHmut-codel	36.3	1	NA	CGGA	NA	NA	NA	NA	NA	NA	NA	NA	NA	NA	NA	NA	0.83996	3.08916
CGGA_283	Oligodendroglioma	II	IDHmut-codel	114.1	1	NA	CGGA	NA	NA	NA	NA	NA	NA	NA	NA	NA	NA	NA	NA	-0.0892673	4.15704
CGGA_288	Oligodendroglioma	II	IDHmut-codel	34.8	1	NA	CGGA	NA	NA	NA	NA	NA	NA	NA	NA	NA	NA	NA	NA	2.22033	2.61824
CGGA_290	Oligodendroglioma	II	IDHmut-codel	144.3	0	NA	CGGA	NA	NA	NA	NA	NA	NA	NA	NA	NA	NA	NA	NA	-0.415037	5.09803
CGGA_300	Astrocytoma	II	IDHmut-non-codel	72.3	1	NA	CGGA	NA	NA	NA	NA	NA	NA	NA	NA	NA	NA	NA	NA	0.495695	4.09001
CGGA_309	NA	NA	NA	4.6	1	NA	CGGA	NA	NA	NA	NA	NA	NA	NA	NA	NA	NA	NA	NA	1.7866	3.58736
CGGA_314	Oligodendroglioma	III	IDHmut-codel	84.4	1	NA	CGGA	NA	NA	NA	NA	NA	NA	NA	NA	NA	NA	NA	NA	-0.234465	4.43829
CGGA_318	GBM	IV	IDHwt	7.3	1	NA	CGGA	NA	NA	NA	NA	NA	NA	NA	NA	NA	NA	NA	NA	5.31759	2.09424
CGGA_320	Oligodendroglioma	II	IDHmut-codel	98.8	1	NA	CGGA	NA	NA	NA	NA	NA	NA	NA	NA	NA	NA	NA	NA	-0.643856	3.70929
CGGA_323	Oligodendroglioma	II	IDHwt	142.6	0	NA	CGGA	3981.03	2626.08	5870.68	142.887	3197.16	0.000999001	1	0.743257	1	0.000999001	PN	DEV	0.464668	3.79701
CGGA_330	Anaplastic Astrocytoma	III	IDHwt	36.9	1	NA	CGGA	2663.61	3876.68	7937.09	5724.52	-1067.16	1	0.000999001	0.000999001	0.000999001	1	NA	INJ	2.1635	3.89433
CGGA_333	Astrocytoma	II	IDHmut-non-codel	58.6	0	NA	CGGA	NA	NA	NA	NA	NA	NA	NA	NA	NA	NA	NA	NA	1.28688	4.36247
CGGA_336	Anaplastic Oligodendrolgioma	III	IDHmut-codel	83.8	1	NA	CGGA	NA	NA	NA	NA	NA	NA	NA	NA	NA	NA	NA	NA	2.31325	3.59694
CGGA_337	Anaplastic Astrocytoma	III	IDHmut-non-codel	33.1	1	NA	CGGA	NA	NA	NA	NA	NA	NA	NA	NA	NA	NA	NA	NA	0.594549	4.21257
CGGA_342	GBM	IV	NA	16.4	1	NA	CGGA	NA	NA	NA	NA	NA	NA	NA	NA	NA	NA	NA	NA	2.08746	3.03914
CGGA_358	Anaplastic Astrocytoma	III	IDHmut-non-codel	4	1	NA	CGGA	NA	NA	NA	NA	NA	NA	NA	NA	NA	NA	NA	NA	1.58496	2.50335
CGGA_362	Astrocytoma	II	IDHmut-codel	55.2	0	NA	CGGA	NA	NA	NA	NA	NA	NA	NA	NA	NA	NA	NA	NA	4.38474	3.74739
CGGA_369	Astrocytoma	II	IDHmut-non-codel	140.4	0	NA	CGGA	NA	NA	NA	NA	NA	NA	NA	NA	NA	NA	NA	NA	0.432959	2.58496
CGGA_374	GBM	IV	IDHmut-non-codel	16.2	1	NA	CGGA	NA	NA	NA	NA	NA	NA	NA	NA	NA	NA	NA	NA	0.765535	4.62
CGGA_400	Anaplastic Astrocytoma	III	IDHmut-non-codel	43.4	1	NA	CGGA	NA	NA	NA	NA	NA	NA	NA	NA	NA	NA	NA	NA	1.74846	4.03034
CGGA_406	Anaplastic Astrocytoma	III	IDHmut-non-codel	3	1	NA	CGGA	NA	NA	NA	NA	NA	NA	NA	NA	NA	NA	NA	NA	0.815575	3.73769
CGGA_413	GBM	IV	IDHwt	6	0	NA	CGGA	3143.16	3043.46	7928.65	3492.53	-1745.11	0.818182	0.000999001	0.000999001	0.372627	1	CL	INJ	1.0635	4.20789
CGGA_42	Astrocytoma	II	IDHmut-codel	93.1	1	NA	CGGA	NA	NA	NA	NA	NA	NA	NA	NA	NA	NA	NA	NA	1	3.9607
CGGA_420	Anaplastic Oligodendrolgioma	III	IDHmut-codel	115.5	0	NA	CGGA	NA	NA	NA	NA	NA	NA	NA	NA	NA	NA	NA	NA	-0.556393	3.8748
CGGA_426	Anaplastic Astrocytoma	III	IDHwt	51.3	1	NA	CGGA	2409.63	3938.02	6963.59	7068.03	-2165.53	1	0.000999001	0.001998	0.000999001	1	MES	INJ	4.1127	4.1127
CGGA_431	Oligodendroglioma	III	IDHmut-codel	137.4	0	NA	CGGA	NA	NA	NA	NA	NA	NA	NA	NA	NA	NA	NA	NA	-0.168123	4.63343
CGGA_446	Oligodendroglioma	II	IDHmut-codel	137.2	0	NA	CGGA	NA	NA	NA	NA	NA	NA	NA	NA	NA	NA	NA	NA	-0.473931	4.82731
CGGA_448	Anaplastic Astrocytoma	III	IDHwt	11.6	1	NA	CGGA	2327.6	4263.58	5858.43	6778.28	0.379624	1	0.000999001	0.751249	0.000999001	0.989011	MES	INJ	3.5373	3.39506
CGGA_457	Anaplastic Astrocytoma	III	IDHmut-non-codel	2.5	1	NA	CGGA	NA	NA	NA	NA	NA	NA	NA	NA	NA	NA	NA	NA	2.79909	3.5435
CGGA_458	Astrocytoma	II	IDHmut-non-codel	13.8	1	NA	CGGA	NA	NA	NA	NA	NA	NA	NA	NA	NA	NA	NA	NA	0.0565835	4.36036
CGGA_474	Anaplastic Oligodendrolgioma	III	IDHwt	66.7	0	NA	CGGA	3092.62	2100.54	4493.65	1967.72	1040.66	0.972028	1	1	0.993007	0.679321	PN	DEV	0.713696	2.24793
CGGA_479	Oligodendroglioma	II	IDHmut-codel	135.4	0	NA	CGGA	NA	NA	NA	NA	NA	NA	NA	NA	NA	NA	NA	NA	0.0703893	4.3875
CGGA_482	Oligodendroglioma	II	IDHmut-codel	82.6	1	NA	CGGA	NA	NA	NA	NA	NA	NA	NA	NA	NA	NA	NA	NA	0.378512	3.89142
CGGA_483	GBM	IV	IDHwt	9.1	1	NA	CGGA	1803.4	4522.03	6606.16	6991.72	-1433.83	1	0.000999001	0.044955	0.000999001	1	MES	INJ	5.93121	2.49313
CGGA_485	Oligodendroglioma	II	IDHmut-codel	80.1	0	NA	CGGA	NA	NA	NA	NA	NA	NA	NA	NA	NA	NA	NA	NA	0.333424	4.75114
CGGA_487	GBM	IV	IDHwt	5.1	1	NA	CGGA	NA	NA	NA	NA	NA	NA	NA	NA	NA	NA	NA	NA	1.42223	3.90014
CGGA_488	Anaplastic Astrocytoma	III	IDHwt	14.3	1	NA	CGGA	4257.16	2026.48	7016.7	1154.79	3492.4	0.000999001	1	0.000999001	1	0.000999001	CL	DEV	1.43829	4.37504
CGGA_490	Anaplastic Oligodendrolgioma	III	IDHmut-codel	125.1	0	NA	CGGA	NA	NA	NA	NA	NA	NA	NA	NA	NA	NA	NA	NA	-0.217591	4.33199
CGGA_491	GBM	IV	IDHmut-non-codel	35.3	1	NA	CGGA	NA	NA	NA	NA	NA	NA	NA	NA	NA	NA	NA	NA	0.722466	4.29719
CGGA_492	Anaplastic Astrocytoma	III	IDHwt	21.4	0	NA	CGGA	NA	NA	NA	NA	NA	NA	NA	NA	NA	NA	NA	NA	1.39506	3.51475
CGGA_493	Astrocytoma	II	IDHmut-non-codel	78.3	1	NA	CGGA	NA	NA	NA	NA	NA	NA	NA	NA	NA	NA	NA	NA	0.0703893	4.45943
CGGA_494	GBM	IV	IDHwt	135.1	0	NA	CGGA	3986.11	2682.26	6577.12	476.448	2688.99	0.000999001	1	0.0539461	1	0.00799201	PN	DEV	1.65535	4.28392
CGGA_495	NA	NA	NA	9.7	1	NA	CGGA	NA	NA	NA	NA	NA	NA	NA	NA	NA	NA	NA	NA	2.63459	3.0993
CGGA_499	GBM	IV	IDHwt	4	1	NA	CGGA	3506.78	2930.92	5655.78	3554.62	3601.34	0.000999001	0.0519481	0.916084	0.312687	0.000999001	PN	DEV	2.16993	4.49378
CGGA_501	Oligodendroglioma	II	IDHmut-codel	134.8	0	NA	CGGA	NA	NA	NA	NA	NA	NA	NA	NA	NA	NA	NA	NA	-0.217591	4.34625
CGGA_502	Astrocytoma	II	IDHmut-non-codel	134.4	0	NA	CGGA	NA	NA	NA	NA	NA	NA	NA	NA	NA	NA	NA	NA	-0.184425	4.46663
CGGA_503	Astrocytoma	II	IDHmut-non-codel	134.3	0	NA	CGGA	NA	NA	NA	NA	NA	NA	NA	NA	NA	NA	NA	NA	0.956057	4.07468
CGGA_507	Anaplastic Astrocytoma	III	IDHmut-non-codel	9.9	1	NA	CGGA	NA	NA	NA	NA	NA	NA	NA	NA	NA	NA	NA	NA	0.124328	2.87774
CGGA_509	GBM	IV	IDHwt	20.5	1	NA	CGGA	3472.08	2208.3	5032.33	3395.5	3254	0.000999001	1	1	0.446553	0.000999001	PN	DEV	1.65076	3.74308
CGGA_510	Anaplastic Oligodendrolgioma	III	IDHmut-codel	134	0	NA	CGGA	NA	NA	NA	NA	NA	NA	NA	NA	NA	NA	NA	NA	0.62293	5.1807
CGGA_518	GBM	IV	NA	7	1	NA	CGGA	NA	NA	NA	NA	NA	NA	NA	NA	NA	NA	NA	NA	0.0143553	4.13175
CGGA_521	Anaplastic Astrocytoma	III	IDHwt	16.9	1	NA	CGGA	3659.23	2724.74	5843.77	1630.89	3607.58	0.000999001	1	0.767233	0.999001	0.000999001	PN	DEV	0.15056	3.95047
CGGA_525	GBM	IV	IDHwt	4.5	1	NA	CGGA	2260.51	3929.86	6102.16	7142.61	-1005.31	1	0.000999001	0.480519	0.000999001	1	MES	INJ	2.55336	2.97085
CGGA_530	GBM	IV	IDHwt	16.6	1	NA	CGGA	NA	NA	NA	NA	NA	NA	NA	NA	NA	NA	NA	NA	1.76553	3.76129
CGGA_538	Oligodendroglioma	II	IDHmut-codel	NA	NA	NA	CGGA	NA	NA	NA	NA	NA	NA	NA	NA	NA	NA	NA	NA	0.0565835	4.96023
CGGA_541	Astrocytoma	II	IDHwt	133.1	0	NA	CGGA	4014.26	2670.52	6217.66	470.735	3106.39	0.000999001	1	0.331668	1	0.000999001	PN	DEV	0.15056	3.60763
CGGA_543	Oligodendroglioma	II	IDHmut-codel	132.9	0	NA	CGGA	NA	NA	NA	NA	NA	NA	NA	NA	NA	NA	NA	NA	-0.434403	3.75275
CGGA_545	GBM	IV	IDHmut-non-codel	18.2	1	NA	CGGA	NA	NA	NA	NA	NA	NA	NA	NA	NA	NA	NA	NA	1.05658	4.65592
CGGA_551	Oligodendroglioma	II	IDHmut-codel	132.6	0	NA	CGGA	NA	NA	NA	NA	NA	NA	NA	NA	NA	NA	NA	NA	-0.535332	4.47573
CGGA_554	Anaplastic Oligoastrocytoma	III	NA	4.4	1	NA	CGGA	NA	NA	NA	NA	NA	NA	NA	NA	NA	NA	NA	NA	2.40054	2.58976
CGGA_560	Anaplastic Astrocytoma	III	IDHmut-non-codel	132.3	0	NA	CGGA	NA	NA	NA	NA	NA	NA	NA	NA	NA	NA	NA	NA	1.43829	4.38405
CGGA_564	Anaplastic Astrocytoma	III	IDHwt	22.3	1	NA	CGGA	3596.03	2977.68	7549.97	1929.89	1796.62	0.000999001	0.004995	0.000999001	0.996004	0.171828	CL	DEV	0.903038	3.95977
CGGA_565	Anaplastic Astrocytoma	III	IDHwt	118.5	0	NA	CGGA	4015.45	2652.29	7049.23	118.894	2741.45	0.000999001	1	0.000999001	1	0.00599401	CL	DEV	0.704872	4.18031
CGGA_568	GBM	IV	IDHwt	9.4	1	NA	CGGA	NA	NA	NA	NA	NA	NA	NA	NA	NA	NA	NA	NA	2.79701	2.38681
CGGA_578	Anaplastic Astrocytoma	III	IDHwt	11.9	1	NA	CGGA	3756.13	2346.84	6152.29	712.85	4308.83	0.000999001	1	0.418581	1	0.000999001	PN	DEV	0.604071	5.20711
CGGA_580	Astrocytoma	II	IDHmut-non-codel	45.8	1	NA	CGGA	NA	NA	NA	NA	NA	NA	NA	NA	NA	NA	NA	NA	0.250962	3.89239
CGGA_583	Astrocytoma	II	NA	102.1	1	NA	CGGA	NA	NA	NA	NA	NA	NA	NA	NA	NA	NA	NA	NA	-0.810966	3.04963
CGGA_591	Anaplastic Astrocytoma	III	IDHmut-non-codel	54.4	1	NA	CGGA	NA	NA	NA	NA	NA	NA	NA	NA	NA	NA	NA	NA	0.475085	4.5373
CGGA_598	Anaplastic Oligodendrolgioma	III	IDHmut-codel	120.9	1	NA	CGGA	NA	NA	NA	NA	NA	NA	NA	NA	NA	NA	NA	NA	-0.217591	4.6153
CGGA_599	Anaplastic Oligodendrolgioma	III	IDHwt	13.7	1	NA	CGGA	3504.83	2641.58	6766.52	1295.6	2118.46	0.000999001	1	0.015984	1	0.0659341	CL	DEV	-0.217591	3.92505
CGGA_601	Astrocytoma	II	IDHmut-non-codel	37.2	1	NA	CGGA	NA	NA	NA	NA	NA	NA	NA	NA	NA	NA	NA	NA	1.07039	4.15947
CGGA_603	Anaplastic Astrocytoma	III	IDHmut-non-codel	5.5	0	NA	CGGA	NA	NA	NA	NA	NA	NA	NA	NA	NA	NA	NA	NA	0.0426443	4.28466
CGGA_604	GBM	IV	IDHwt	12.5	1	NA	CGGA	2574.46	4163.45	6208.75	7678.5	9.23604	1	0.000999001	0.33966	0.000999001	0.989011	MES	INJ	3.93546	3.57289
CGGA_605	Astrocytoma	III	IDHmut-non-codel	130.6	0	NA	CGGA	NA	NA	NA	NA	NA	NA	NA	NA	NA	NA	NA	NA	2.34199	3.90593
CGGA_607	Astrocytoma	II	IDHmut-non-codel	45.7	0	NA	CGGA	NA	NA	NA	NA	NA	NA	NA	NA	NA	NA	NA	NA	0.344828	4.85997
CGGA_616	Anaplastic Astrocytoma	III	IDHwt	31.3	1	NA	CGGA	2885.15	3577.3	7431.29	5740.47	-1488.21	1	0.000999001	0.000999001	0.000999001	1	NA	INJ	2.0036	3.89627
CGGA_619	Astrocytoma	II	IDHwt	18.1	1	NA	CGGA	NA	NA	NA	NA	NA	NA	NA	NA	NA	NA	NA	NA	0.713696	2.51602
CGGA_621	Anaplastic Astrocytoma	III	IDHmut-non-codel	44.3	0	NA	CGGA	NA	NA	NA	NA	NA	NA	NA	NA	NA	NA	NA	NA	0.632268	3.26754
CGGA_624	GBM	IV	IDHwt	4	1	NA	CGGA	NA	NA	NA	NA	NA	NA	NA	NA	NA	NA	NA	NA	2.55827	4.08151
CGGA_625	Anaplastic Oligodendrolgioma	III	IDHmut-codel	81	1	NA	CGGA	NA	NA	NA	NA	NA	NA	NA	NA	NA	NA	NA	NA	-0.340075	2.96717
CGGA_630	Oligodendroglioma	III	IDHmut-codel	130.6	0	NA	CGGA	NA	NA	NA	NA	NA	NA	NA	NA	NA	NA	NA	NA	-0.120294	4.43162
CGGA_632	Astrocytoma	II	IDHmut-non-codel	18.9	1	NA	CGGA	NA	NA	NA	NA	NA	NA	NA	NA	NA	NA	NA	NA	1.37295	4.46597
CGGA_633	Oligodendroglioma	II	IDHwt	59.6	1	NA	CGGA	4552.23	2202.33	6961.88	-68.6971	3563.37	0.000999001	1	0.001998	1	0.000999001	PN	DEV	0.163499	4.92029
CGGA_634	Anaplastic Astrocytoma	III	IDHmut-non-codel	86.6	1	NA	CGGA	NA	NA	NA	NA	NA	NA	NA	NA	NA	NA	NA	NA	0.321928	4.1643
CGGA_635	Oligodendroglioma	II	IDHmut-codel	129.3	0	NA	CGGA	NA	NA	NA	NA	NA	NA	NA	NA	NA	NA	NA	NA	-0.785875	4.61706
CGGA_638	Oligodendroglioma	II	IDHmut-codel	78.4	0	NA	CGGA	NA	NA	NA	NA	NA	NA	NA	NA	NA	NA	NA	NA	-0.184425	4.11103
CGGA_641	Anaplastic Oligodendrolgioma	III	IDHmut-codel	112.1	1	NA	CGGA	NA	NA	NA	NA	NA	NA	NA	NA	NA	NA	NA	NA	-0.0291463	4.99639
CGGA_642	Astrocytoma	II	IDHmut-non-codel	128.9	0	NA	CGGA	NA	NA	NA	NA	NA	NA	NA	NA	NA	NA	NA	NA	0.722466	4.77452
CGGA_643	Anaplastic Astrocytoma	III	IDHwt	10.9	1	NA	CGGA	4148.58	1908.12	4458.01	709.038	5818.26	0.000999001	1	1	1	0.000999001	PN	DEV	0.475085	3.71699
CGGA_652	Anaplastic Astrocytoma	III	IDHmut-non-codel	15.6	1	NA	CGGA	NA	NA	NA	NA	NA	NA	NA	NA	NA	NA	NA	NA	0.432959	3.07724
CGGA_655	Oligodendroglioma	II	IDHmut-codel	128.3	0	NA	CGGA	NA	NA	NA	NA	NA	NA	NA	NA	NA	NA	NA	NA	0.333424	4.26228
CGGA_658	GBM	IV	IDHwt	12.2	1	NA	CGGA	3623.28	3050.5	6666.55	3667.39	4484.57	0.000999001	0.000999001	0.027972	0.232767	0.000999001	PN	NA	1.14405	4.28392
CGGA_659	Oligodendroglioma	II	IDHwt	24	0	NA	CGGA	4030.92	2633.73	6166.68	492.316	3185.89	0.000999001	1	0.396603	1	0.000999001	PN	DEV	0.137504	3.5656
CGGA_661	Anaplastic Astrocytoma	III	IDHwt	NA	1	NA	CGGA	2373.24	4182.58	6514	7343.83	-501.23	1	0.000999001	0.0759241	0.000999001	1	MES	INJ	2.78031	3.51475
CGGA_662	Oligodendroglioma	II	IDHmut-codel	9.3	1	NA	CGGA	NA	NA	NA	NA	NA	NA	NA	NA	NA	NA	NA	NA	0.0143553	4.60881
CGGA_663	Astrocytoma	II	IDHmut-non-codel	127.6	0	NA	CGGA	NA	NA	NA	NA	NA	NA	NA	NA	NA	NA	NA	NA	-0.514573	3.99277
CGGA_666	Oligodendroglioma	II	IDHmut-codel	82.2	1	NA	CGGA	NA	NA	NA	NA	NA	NA	NA	NA	NA	NA	NA	NA	-0.836501	4.47897
CGGA_669	GBM	IV	NA	20	1	NA	CGGA	NA	NA	NA	NA	NA	NA	NA	NA	NA	NA	NA	NA	-0.454032	3.45549
CGGA_671	Oligodendroglioma	II	IDHmut-codel	127.7	0	NA	CGGA	NA	NA	NA	NA	NA	NA	NA	NA	NA	NA	NA	NA	-0.621488	4.51223
CGGA_675	Oligodendroglioma	II	IDHmut-codel	127.6	0	NA	CGGA	NA	NA	NA	NA	NA	NA	NA	NA	NA	NA	NA	NA	-1	4.63517
CGGA_676	GBM	IV	IDHwt	12.4	1	NA	CGGA	2977.39	3515.59	7891.81	4339.09	-628.538	1	0.000999001	0.000999001	0.028971	1	CL	INJ	2.34767	4.19928
CGGA_678	Anaplastic Astrocytoma	III	IDHwt	12.7	1	NA	CGGA	NA	NA	NA	NA	NA	NA	NA	NA	NA	NA	NA	NA	2.61117	4.20477
CGGA_679	GBM	IV	IDHwt	8.6	1	NA	CGGA	2899.12	3553.06	6325.77	4482.55	1592.68	1	0.000999001	0.204795	0.011988	0.262737	MES	INJ	1.21412	3.68482
CGGA_680	GBM	IV	IDHwt	78	1	NA	CGGA	3995.27	2199.91	6035.26	-337.587	4273.47	0.000999001	1	0.561439	1	0.000999001	PN	DEV	-0.304006	4.45746
CGGA_681	NA	NA	NA	3.6	1	NA	CGGA	NA	NA	NA	NA	NA	NA	NA	NA	NA	NA	NA	NA	2.19219	4.32984
CGGA_685	Astrocytoma	II	IDHmut-non-codel	106.5	1	NA	CGGA	NA	NA	NA	NA	NA	NA	NA	NA	NA	NA	NA	NA	0.495695	4.74524
CGGA_689	Oligodendroglioma	II	IDHmut-codel	127	0	NA	CGGA	NA	NA	NA	NA	NA	NA	NA	NA	NA	NA	NA	NA	1.09761	4.78607
CGGA_694	Astrocytoma	II	IDHmut-non-codel	39.3	1	NA	CGGA	NA	NA	NA	NA	NA	NA	NA	NA	NA	NA	NA	NA	0.432959	3.99005
CGGA_698	Astrocytoma	II	IDHmut-non-codel	60.9	1	NA	CGGA	NA	NA	NA	NA	NA	NA	NA	NA	NA	NA	NA	NA	0.545968	4.87971
CGGA_700	GBM	IV	IDHmut-non-codel	5.6	0	NA	CGGA	NA	NA	NA	NA	NA	NA	NA	NA	NA	NA	NA	NA	-0.152003	4.69655
CGGA_703	Anaplastic Oligodendrolgioma	III	IDHmut-non-codel	44.5	1	NA	CGGA	NA	NA	NA	NA	NA	NA	NA	NA	NA	NA	NA	NA	3.45681	2.68706
CGGA_704	Astrocytoma	II	IDHmut-non-codel	84.6	1	NA	CGGA	NA	NA	NA	NA	NA	NA	NA	NA	NA	NA	NA	NA	-0.251539	4.31759
CGGA_705	Anaplastic Astrocytoma	III	IDHmut-non-codel	49.5	1	NA	CGGA	NA	NA	NA	NA	NA	NA	NA	NA	NA	NA	NA	NA	0.464668	4.16189
CGGA_707	Oligodendroglioma	II	IDHmut-codel	108.5	1	NA	CGGA	NA	NA	NA	NA	NA	NA	NA	NA	NA	NA	NA	NA	-0.415037	5.02104
CGGA_710	GBM	IV	IDHmut-non-codel	21.7	1	NA	CGGA	NA	NA	NA	NA	NA	NA	NA	NA	NA	NA	NA	NA	1.15056	4.13093
CGGA_715	Oligodendroglioma	II	IDHmut-codel	112.7	0	NonAltered	CGGA	NA	NA	NA	NA	NA	NA	NA	NA	NA	NA	NA	NA	-0.136062	4.49185
CGGA_719	GBM	IV	NA	3.3	1	NA	CGGA	NA	NA	NA	NA	NA	NA	NA	NA	NA	NA	NA	NA	1.5656	4.40939
CGGA_720	Astrocytoma	II	IDHmut-non-codel	41.4	1	NA	CGGA	NA	NA	NA	NA	NA	NA	NA	NA	NA	NA	NA	NA	-0.168123	3.01614
CGGA_721	Astrocytoma	II	IDHmut-non-codel	83.9	1	NA	CGGA	NA	NA	NA	NA	NA	NA	NA	NA	NA	NA	NA	NA	0.731183	4.19298
CGGA_724	Astrocytoma	II	IDHmut-non-codel	125.5	0	NA	CGGA	NA	NA	NA	NA	NA	NA	NA	NA	NA	NA	NA	NA	-0.0439433	2.36177
CGGA_725	Oligodendroglioma	II	IDHmut-codel	125.5	0	NA	CGGA	NA	NA	NA	NA	NA	NA	NA	NA	NA	NA	NA	NA	-0.473931	5.18547
CGGA_727	Anaplastic Astrocytoma	III	IDHwt	33.6	1	NA	CGGA	3652.47	2690.03	8088.05	988.458	994.091	0.000999001	1	0.000999001	1	0.702298	CL	DEV	0.321928	4.14241
CGGA_730	Oligodendroglioma	II	IDHmut-codel	69.6	1	NA	CGGA	NA	NA	NA	NA	NA	NA	NA	NA	NA	NA	NA	NA	-0.120294	3.16993
CGGA_731	GBM	IV	IDHwt	16.5	1	NA	CGGA	2999.36	3640.09	7730.01	6569.82	-589.81	1	0.000999001	0.000999001	0.000999001	1	NA	INJ	2.24489	3.90785
CGGA_732	Anaplastic Astrocytoma	III	IDHwt	NA	NA	NA	CGGA	3183.95	2558.49	7727.57	1789.26	-444.377	0.501499	1	0.000999001	0.999001	1	CL	DEV	1.44361	4.33128
CGGA_738	Astrocytoma	II	IDHmut-non-codel	125	0	NA	CGGA	NA	NA	NA	NA	NA	NA	NA	NA	NA	NA	NA	NA	2.43296	4.89579
CGGA_747	GBM	IV	IDHmut-non-codel	31.9	1	NA	CGGA	NA	NA	NA	NA	NA	NA	NA	NA	NA	NA	NA	NA	-0.234465	5.41041
CGGA_752	Oligodendroglioma	II	IDHmut-codel	121	0	NA	CGGA	NA	NA	NA	NA	NA	NA	NA	NA	NA	NA	NA	NA	-0.321928	4.29057
CGGA_757	Astrocytoma	II	IDHmut-non-codel	34.4	1	NA	CGGA	NA	NA	NA	NA	NA	NA	NA	NA	NA	NA	NA	NA	1.52105	4.70155
CGGA_759	GBM	IV	IDHmut-non-codel	41.5	1	NA	CGGA	NA	NA	NA	NA	NA	NA	NA	NA	NA	NA	NA	NA	1.82782	4.6792
CGGA_760	Oligodendroglioma	II	IDHmut-codel	124.3	0	NA	CGGA	NA	NA	NA	NA	NA	NA	NA	NA	NA	NA	NA	NA	0.992768	4.26379
CGGA_761	GBM	IV	IDHmut-non-codel	60.5	1	NA	CGGA	NA	NA	NA	NA	NA	NA	NA	NA	NA	NA	NA	NA	2.3978	4.68089
CGGA_762	Oligodendroglioma	II	IDHmut-codel	124.1	0	NonAltered	CGGA	NA	NA	NA	NA	NA	NA	NA	NA	NA	NA	NA	NA	-1	4.60999
CGGA_763	Anaplastic Astrocytoma	III	IDHwt	10.5	0	NA	CGGA	NA	NA	NA	NA	NA	NA	NA	NA	NA	NA	NA	NA	-0.0291463	4.0063
CGGA_766	Oligodendroglioma	II	IDHmut-codel	124	0	NA	CGGA	NA	NA	NA	NA	NA	NA	NA	NA	NA	NA	NA	NA	0.163499	4.41819
CGGA_773	GBM	IV	IDHmut-non-codel	14.6	1	NA	CGGA	NA	NA	NA	NA	NA	NA	NA	NA	NA	NA	NA	NA	0.815575	4.19377
CGGA_777	GBM	IV	IDHwt	4.8	1	NA	CGGA	NA	NA	NA	NA	NA	NA	NA	NA	NA	NA	NA	NA	3.61706	3.03562
CGGA_780	Anaplastic Oligodendrolgioma	III	IDHwt	30.3	1	NA	CGGA	NA	NA	NA	NA	NA	NA	NA	NA	NA	NA	NA	NA	0.344828	2.65764
CGGA_782	GBM	IV	IDHwt	9.5	1	NA	CGGA	3196.34	3401.43	6115.75	5011.33	2376	0.386613	0.000999001	0.471528	0.000999001	0.025974	MES	INJ	0.85599	4.06091
CGGA_785	Oligodendroglioma	II	IDHmut-codel	115.6	1	NonAltered	CGGA	NA	NA	NA	NA	NA	NA	NA	NA	NA	NA	NA	NA	1.52105	3.99186
CGGA_789	GBM	IV	IDHwt	11.3	1	NA	CGGA	3083.32	3549.69	5643.48	6009.49	1965.89	0.985015	0.000999001	0.919081	0.000999001	0.107892	MES	INJ	2.59455	3.25096
CGGA_791	Anaplastic Astrocytoma	III	IDHwt	8.3	1	NA	CGGA	3743	2662.98	6630.16	1253.49	3372.52	0.000999001	1	0.03996	1	0.000999001	PN	DEV	0.575312	3.28836
CGGA_796	Astrocytoma	II	IDHwt	18.4	0	NA	CGGA	3378.05	2860.77	7662	839.547	-478.086	0.000999001	0.535465	0.000999001	1	1	CL	DEV	0.871844	3.24184
CGGA_799	Anaplastic Oligodendrolgioma	III	IDHmut-codel	61.4	1	NA	CGGA	NA	NA	NA	NA	NA	NA	NA	NA	NA	NA	NA	NA	0.0976108	3
CGGA_802	GBM	IV	IDHwt	22.4	1	NA	CGGA	2795.53	3806.22	7530.72	6798.6	-1597.55	1	0.000999001	0.000999001	0.000999001	1	NA	INJ	3.77926	3.89821
CGGA_804	GBM	IV	IDHwt	20.2	0	NA	CGGA	3210.04	2991.99	6057.92	1739.54	2230.82	0.268731	0.003996	0.539461	0.999001	0.042957	PN	INJ	-0.0892673	3.87971
CGGA_807	Astrocytoma	II	IDHwt	122	0	NA	CGGA	4013	2374.42	5884.9	-973.748	3282.52	0.000999001	1	0.727273	1	0.000999001	PN	DEV	-0.415037	3.57652
CGGA_808	GBM	IV	IDHwt	38.4	0	NA	CGGA	3193.05	2978.82	6134.45	1731.53	1747.37	0.422577	0.004995	0.440559	0.999001	0.188811	PN	INJ	0.555816	3.99367
CGGA_809	Astrocytoma	II	IDHmut-non-codel	41.2	1	NA	CGGA	NA	NA	NA	NA	NA	NA	NA	NA	NA	NA	NA	NA	0.286881	2.91456
CGGA_810	Anaplastic Oligodendrolgioma	III	IDHwt	18.1	1	NA	CGGA	NA	NA	NA	NA	NA	NA	NA	NA	NA	NA	NA	NA	5.82197	2.33914
CGGA_812	Oligodendroglioma	II	IDHmut-codel	121.8	0	NA	CGGA	NA	NA	NA	NA	NA	NA	NA	NA	NA	NA	NA	NA	1.02148	3.91073
CGGA_815	Astrocytoma	II	IDHmut-non-codel	73	1	NA	CGGA	NA	NA	NA	NA	NA	NA	NA	NA	NA	NA	NA	NA	-0.0144996	4.58496
CGGA_818	Astrocytoma	II	IDHmut-non-codel	121.5	0	NA	CGGA	NA	NA	NA	NA	NA	NA	NA	NA	NA	NA	NA	NA	2.59694	4.79494
CGGA_822	GBM	IV	IDHmut-non-codel	73.5	1	NA	CGGA	NA	NA	NA	NA	NA	NA	NA	NA	NA	NA	NA	NA	0.0285692	4.5741
CGGA_825	Anaplastic Astrocytoma	III	IDHmut-non-codel	27.5	1	NA	CGGA	NA	NA	NA	NA	NA	NA	NA	NA	NA	NA	NA	NA	1.15704	3.0321
CGGA_831	GBM	IV	IDHwt	18	1	NA	CGGA	3208.68	2978.23	5690.22	5301.63	2778.53	0.274725	0.004995	0.901099	0.000999001	0.00599401	MES	INJ	2.02148	3.02326
CGGA_834	Astrocytoma	II	IDHwt	121.1	0	NA	CGGA	3832.09	2562.89	7194.46	2980.21	2027.49	0.000999001	1	0.000999001	0.749251	0.0909091	CL	DEV	1.40599	4.0054
CGGA_835	Oligodendroglioma	II	IDHmut-codel	17	0	NonAltered	CGGA	NA	NA	NA	NA	NA	NA	NA	NA	NA	NA	NA	NA	0.0565835	3.77926
CGGA_837	GBM	IV	IDHwt	14.2	1	NA	CGGA	3572.18	2787.78	6543.65	4286.09	1520.29	0.000999001	0.961039	0.0659341	0.036963	0.326673	MES	DEV	2.63459	3.50462
CGGA_838	Oligodendroglioma	II	IDHmut-codel	121	0	NA	CGGA	NA	NA	NA	NA	NA	NA	NA	NA	NA	NA	NA	NA	0.432959	4.39163
CGGA_842	GBM	IV	IDHwt	6.7	1	NA	CGGA	2034.07	4172.82	6773.67	7180.28	-2170.95	1	0.000999001	0.014985	0.000999001	1	MES	INJ	4.85848	4.03122
CGGA_843	Oligodendroglioma	II	IDHmut-codel	120.8	0	NA	CGGA	NA	NA	NA	NA	NA	NA	NA	NA	NA	NA	NA	NA	-0.494109	4.70874
CGGA_846	Astrocytoma	II	IDHwt	98.3	0	NA	CGGA	NA	NA	NA	NA	NA	NA	NA	NA	NA	NA	NA	NA	0.713696	2.77189
CGGA_848	GBM	IV	IDHwt	7.9	0	NA	CGGA	3041.5	3244.04	7575.47	4200.89	-648.43	1	0.000999001	0.000999001	0.044955	1	CL	INJ	1.69599	3.62293
CGGA_850	GBM	IV	IDHwt	18.5	0	NA	CGGA	3270.57	3284.07	8147.83	3386.21	-25.6958	0.02997	0.000999001	0.000999001	0.453546	0.991009	CL	INJ	1.7866	4.48543
CGGA_852	Anaplastic Astrocytoma	III	IDHwt	5.6	1	NA	CGGA	3341.04	2782.59	6618.99	1452.43	2014.18	0.001998	0.974026	0.042957	1	0.0959041	CL	DEV	0.773996	3.85499
CGGA_856	Oligodendroglioma	II	IDHmut-codel	42.6	0	NA	CGGA	NA	NA	NA	NA	NA	NA	NA	NA	NA	NA	NA	NA	-0.556393	3.89239
CGGA_858	Oligodendroglioma	II	IDHmut-codel	120.1	0	NonAltered	CGGA	NA	NA	NA	NA	NA	NA	NA	NA	NA	NA	NA	NA	-0.556393	4.72465
CGGA_859	GBM	IV	IDHwt	12.7	1	NA	CGGA	2239.7	4156.53	5199.72	8163.89	-5.08697	1	0.000999001	1	0.000999001	0.989011	MES	INJ	4.4522	3.76022
CGGA_861	Anaplastic Astrocytoma	III	IDHwt	29.4	1	NA	CGGA	3639.84	2918.58	6450.09	1350.15	2236.12	0.000999001	0.0899101	0.103896	1	0.040959	PN	DEV	1.60881	3.9514
CGGA_862	Astrocytoma	II	IDHmut-non-codel	34.4	0	NA	CGGA	NA	NA	NA	NA	NA	NA	NA	NA	NA	NA	NA	NA	-0.286304	2.80941
CGGA_863	Astrocytoma	II	IDHwt	68.2	1	NA	CGGA	3577.52	2393.03	5771	-640.992	1797.34	0.000999001	1	0.839161	1	0.170829	PN	DEV	-0.535332	3.91648
CGGA_864	Oligodendroglioma	II	IDHmut-codel	119.9	0	NonAltered	CGGA	NA	NA	NA	NA	NA	NA	NA	NA	NA	NA	NA	NA	0.83996	4.29646
CGGA_867	Anaplastic Astrocytoma	III	IDHmut-non-codel	12.1	1	NA	CGGA	NA	NA	NA	NA	NA	NA	NA	NA	NA	NA	NA	NA	1.44361	2.848
CGGA_869	GBM	IV	IDHwt	17.7	0	NA	CGGA	NA	NA	NA	NA	NA	NA	NA	NA	NA	NA	NA	NA	4.22033	2.43029
CGGA_871	Oligodendroglioma	II	IDHmut-codel	119.5	0	NonAltered	CGGA	NA	NA	NA	NA	NA	NA	NA	NA	NA	NA	NA	NA	0.356144	4.53294
CGGA_876	GBM	IV	IDHwt	5.2	1	NA	CGGA	1693.3	4514.28	5036.39	7731.77	-979.862	1	0.000999001	1	0.000999001	1	MES	INJ	3.94205	3.24336
CGGA_878	GBM	IV	IDHwt	28.4	1	NA	CGGA	3182.78	3033.89	8145.52	2489.78	-1047.59	0.511489	0.000999001	0.000999001	0.941059	1	CL	INJ	2.79909	3.79181
CGGA_881	Anaplastic Astrocytoma	III	IDHwt	8.3	1	NA	CGGA	NA	NA	NA	NA	NA	NA	NA	NA	NA	NA	NA	NA	2.87774	3.68257
CGGA_882	Anaplastic Astrocytoma	III	IDHmut-non-codel	33.1	0	NA	CGGA	NA	NA	NA	NA	NA	NA	NA	NA	NA	NA	NA	NA	0.831877	4.02503
CGGA_883	Astrocytoma	II	IDHmut-non-codel	33.4	0	NA	CGGA	NA	NA	NA	NA	NA	NA	NA	NA	NA	NA	NA	NA	-0.415037	2.9782
CGGA_884	Astrocytoma	II	IDHmut-non-codel	37.2	1	NA	CGGA	NA	NA	NA	NA	NA	NA	NA	NA	NA	NA	NA	NA	0.0840643	4.89579
CGGA_887	Anaplastic Oligodendrolgioma	III	IDHwt	33.2	0	NA	CGGA	NA	NA	NA	NA	NA	NA	NA	NA	NA	NA	NA	NA	0.948601	2.36177
CGGA_888	Anaplastic Oligodendrolgioma	III	IDHmut-codel	22	1	NA	CGGA	NA	NA	NA	NA	NA	NA	NA	NA	NA	NA	NA	NA	0.0565835	4.47962
CGGA_889	Astrocytoma	II	IDHmut-non-codel	118.8	0	NA	CGGA	NA	NA	NA	NA	NA	NA	NA	NA	NA	NA	NA	NA	0.163499	3.78031
CGGA_890	Anaplastic Astrocytoma	III	IDHmut-non-codel	98	1	NonAltered	CGGA	NA	NA	NA	NA	NA	NA	NA	NA	NA	NA	NA	NA	-0.340075	4.27053
CGGA_892	Oligodendroglioma	II	IDHmut-codel	14.7	0	NonAltered	CGGA	NA	NA	NA	NA	NA	NA	NA	NA	NA	NA	NA	NA	0.31034	4.35685
CGGA_893	Astrocytoma	II	IDHmut-non-codel	103.9	1	NonAltered	CGGA	NA	NA	NA	NA	NA	NA	NA	NA	NA	NA	NA	NA	-0.152003	4.18982
CGGA_898	Astrocytoma	II	IDHmut-non-codel	54.7	1	NA	CGGA	NA	NA	NA	NA	NA	NA	NA	NA	NA	NA	NA	NA	-0.0439433	4.50653
CGGA_899	GBM	IV	IDHmut-non-codel	7.6	1	NA	CGGA	NA	NA	NA	NA	NA	NA	NA	NA	NA	NA	NA	NA	0.687061	4.44956
CGGA_901	Anaplastic Astrocytoma	III	IDHmut-non-codel	30.5	1	NA	CGGA	NA	NA	NA	NA	NA	NA	NA	NA	NA	NA	NA	NA	1.35614	4.39438
CGGA_902	GBM	IV	IDHwt	6.3	1	NA	CGGA	3225.29	3232.89	4993.65	6261.53	3244.22	0.184815	0.000999001	1	0.000999001	0.000999001	NA	INJ	2.23573	3.73118
CGGA_903	Anaplastic Astrocytoma	III	IDHmut-non-codel	47.8	1	NA	CGGA	NA	NA	NA	NA	NA	NA	NA	NA	NA	NA	NA	NA	2.01792	4.849
CGGA_904	Astrocytoma	II	IDHmut-non-codel	25.4	1	NA	CGGA	NA	NA	NA	NA	NA	NA	NA	NA	NA	NA	NA	NA	0.201634	4.43363
CGGA_905	Astrocytoma	II	IDHmut-non-codel	104.4	1	NA	CGGA	NA	NA	NA	NA	NA	NA	NA	NA	NA	NA	NA	NA	0.137504	4.43363
CGGA_908	Astrocytoma	II	IDHmut-non-codel	80.1	1	NA	CGGA	NA	NA	NA	NA	NA	NA	NA	NA	NA	NA	NA	NA	-0.168123	4.64616
CGGA_909	Astrocytoma	II	IDHmut-non-codel	117.8	0	NA	CGGA	NA	NA	NA	NA	NA	NA	NA	NA	NA	NA	NA	NA	0.454176	4.86394
CGGA_D02	GBM	IV	IDHwt	NA	1	NA	CGGA	NA	NA	NA	NA	NA	NA	NA	NA	NA	NA	NA	NA	1.17632	3.73335
CGGA_D03	GBM	IV	IDHwt	13.9	1	NA	CGGA	2516.27	3503.4	7350.03	3495.97	-2266.83	1	0.000999001	0.000999001	0.367632	1	CL	INJ	3.24945	2.91839
CGGA_D04	Astrocytoma	II	IDHmut-non-codel	110.4	0	NA	CGGA	NA	NA	NA	NA	NA	NA	NA	NA	NA	NA	NA	NA	0.432959	4.44294
CGGA_D06	Anaplastic Astrocytoma	III	NA	NA	1	NA	CGGA	NA	NA	NA	NA	NA	NA	NA	NA	NA	NA	NA	NA	1.7866	3.23573
CGGA_D07	Oligodendroglioma	II	IDHmut-codel	110.2	0	NA	CGGA	NA	NA	NA	NA	NA	NA	NA	NA	NA	NA	NA	NA	0.815575	3.70929
CGGA_D09	GBM	IV	IDHwt	7.7	1	NA	CGGA	3340.16	2876.41	7027.32	3237.09	939.825	0.001998	0.370629	0.000999001	0.565435	0.729271	CL	DEV	1.60407	3.49953
CGGA_D11	Anaplastic Astrocytoma	III	IDHwt	27.2	1	NA	CGGA	3243.09	3057.68	7177.04	2494.67	-120.341	0.104895	0.000999001	0.000999001	0.938062	0.995005	CL	INJ	2.18587	3.90111
CGGA_D14	Anaplastic Astrocytoma	III	IDHmut-non-codel	NA	NA	NonAltered	CGGA	NA	NA	NA	NA	NA	NA	NA	NA	NA	NA	NA	NA	-0.304006	4.10601
CGGA_D15	Oligodendroglioma	II	IDHmut-codel	109.5	0	NA	CGGA	NA	NA	NA	NA	NA	NA	NA	NA	NA	NA	NA	NA	-0.556393	4.66505
CGGA_D16	Anaplastic Astrocytoma	III	IDHwt	8.6	1	NA	CGGA	2149.24	4283.05	5308.57	6518.76	69.7455	1	0.000999001	0.996004	0.000999001	0.987013	MES	INJ	2	3.85
CGGA_D18	Anaplastic Astrocytoma	III	IDHwt	NA	NA	NA	CGGA	3623.8	2746.7	5684.88	2311.19	3809.71	0.000999001	0.995005	0.903097	0.967033	0.000999001	PN	DEV	-0.251539	3.90497
CGGA_D19	Oligodendroglioma	II	IDHmut-codel	9.8	1	NA	CGGA	NA	NA	NA	NA	NA	NA	NA	NA	NA	NA	NA	NA	0.250962	4.40939
CGGA_D20	Astrocytoma	II	IDHmut-non-codel	77.8	1	NonAltered	CGGA	NA	NA	NA	NA	NA	NA	NA	NA	NA	NA	NA	NA	-0.268817	4.43763
CGGA_D21	Anaplastic Astrocytoma	III	IDHmut-non-codel	39.7	1	NonAltered	CGGA	NA	NA	NA	NA	NA	NA	NA	NA	NA	NA	NA	NA	1.74416	4.03386
CGGA_D24	Anaplastic Astrocytoma	III	IDHmut-non-codel	27.5	1	NonAltered	CGGA	NA	NA	NA	NA	NA	NA	NA	NA	NA	NA	NA	NA	0	4.39506
CGGA_D26	GBM	IV	IDHwt	8.6	1	NA	CGGA	NA	NA	NA	NA	NA	NA	NA	NA	NA	NA	NA	NA	5.38267	2.29278
CGGA_D27	Oligodendroglioma	III	IDHmut-codel	108.9	0	NonAltered	CGGA	NA	NA	NA	NA	NA	NA	NA	NA	NA	NA	NA	NA	2.55582	4.99232
CGGA_D28	Anaplastic Astrocytoma	III	IDHmut-non-codel	28.3	1	NonAltered	CGGA	NA	NA	NA	NA	NA	NA	NA	NA	NA	NA	NA	NA	-0.0439433	3.97728
CGGA_D29	Oligodendroglioma	II	IDHmut-codel	108.9	0	NA	CGGA	NA	NA	NA	NA	NA	NA	NA	NA	NA	NA	NA	NA	-0.862496	4.34908
CGGA_D30	GBM	IV	IDHwt	7.1	1	NA	CGGA	3148.25	2916.64	6489.66	2249.64	2169.18	0.789211	0.0989011	0.0809191	0.974026	0.0569431	PN	INJ	1.81558	3.10266
CGGA_D32	GBM	IV	IDHwt	11.8	1	NA	CGGA	NA	NA	NA	NA	NA	NA	NA	NA	NA	NA	NA	NA	2.23573	4.0197
CGGA_D33	Anaplastic Astrocytoma	III	IDHmut-non-codel	3.8	1	NonAltered	CGGA	NA	NA	NA	NA	NA	NA	NA	NA	NA	NA	NA	NA	2.89142	4.03914
CGGA_D34	GBM	IV	IDHmut-non-codel	4.8	1	NA	CGGA	NA	NA	NA	NA	NA	NA	NA	NA	NA	NA	NA	NA	0.831877	3.60763
CGGA_D35	GBM	IV	IDHwt	21.7	1	NA	CGGA	1859.06	4326.68	5654.76	7642.27	-772.465	1	0.000999001	0.916084	0.000999001	1	MES	INJ	4.15947	2.03914
CGGA_D36	GBM	IV	IDHwt	1.1	1	NA	CGGA	NA	NA	NA	NA	NA	NA	NA	NA	NA	NA	NA	NA	4.51916	2.12102
CGGA_D37	GBM	IV	IDHwt	31.7	1	NA	CGGA	2255.99	4195.85	5673	7587.16	-15.497	1	0.000999001	0.911089	0.000999001	0.989011	MES	INJ	1.4489	3.5472
CGGA_D38	GBM	IV	IDHmut-codel	22.7	1	NA	CGGA	NA	NA	NA	NA	NA	NA	NA	NA	NA	NA	NA	NA	0.321928	5.29572
CGGA_D39	Astrocytoma	II	IDHmut-non-codel	NA	NA	NonAltered	CGGA	NA	NA	NA	NA	NA	NA	NA	NA	NA	NA	NA	NA	0.31034	4.28836
CGGA_D40	Astrocytoma	II	IDHmut-non-codel	105.8	0	NA	CGGA	NA	NA	NA	NA	NA	NA	NA	NA	NA	NA	NA	NA	0.978196	4.20555
CGGA_D44	Anaplastic Astrocytoma	III	IDHwt	10.3	1	NA	CGGA	3775.15	2640.77	7835.47	1822.61	870.536	0.000999001	1	0.000999001	0.999001	0.771229	CL	DEV	1.38405	4.66789
CGGA_D45	Anaplastic Astrocytoma	III	IDHmut-non-codel	28.1	0	NonAltered	CGGA	NA	NA	NA	NA	NA	NA	NA	NA	NA	NA	NA	NA	0.863938	4.98459
CGGA_D46	Anaplastic Astrocytoma	III	IDHmut-non-codel	9.9	1	NonAltered	CGGA	NA	NA	NA	NA	NA	NA	NA	NA	NA	NA	NA	NA	0.9855	4.49889
CGGA_D47	Oligodendroglioma	II	IDHmut-codel	34.5	1	NonAltered	CGGA	NA	NA	NA	NA	NA	NA	NA	NA	NA	NA	NA	NA	0.641546	4.46989
CGGA_D48	Anaplastic Astrocytoma	III	IDHmut-non-codel	7.3	1	NonAltered	CGGA	NA	NA	NA	NA	NA	NA	NA	NA	NA	NA	NA	NA	0.111031	4.19219
CGGA_D49	NA	NA	IDHmut-codel	NA	NA	NA	CGGA	NA	NA	NA	NA	NA	NA	NA	NA	NA	NA	NA	NA	-0.104697	4.17313
CGGA_D50	Oligodendroglioma	II	IDHmut-codel	25.7	1	NonAltered	CGGA	NA	NA	NA	NA	NA	NA	NA	NA	NA	NA	NA	NA	0.678072	4.45352
CGGA_D51	GBM	IV	IDHwt	4.4	1	NonAltered	CGGA	NA	NA	NA	NA	NA	NA	NA	NA	NA	NA	NA	NA	3.58856	4.01346
CGGA_D52	Anaplastic Oligodendrolgioma	III	IDHmut-codel	104.9	0	NA	CGGA	NA	NA	NA	NA	NA	NA	NA	NA	NA	NA	NA	NA	1.68706	4.69877
CGGA_D53	GBM	IV	IDHwt	NA	NA	NA	CGGA	NA	NA	NA	NA	NA	NA	NA	NA	NA	NA	NA	NA	2.98368	3.66562
CGGA_D56	Anaplastic Astrocytoma	III	IDHmut-non-codel	2.1	1	NA	CGGA	NA	NA	NA	NA	NA	NA	NA	NA	NA	NA	NA	NA	1.59932	3.88947
CGGA_D57	GBM	IV	IDHwt	25.2	1	NA	CGGA	2863.53	3709.08	7243.93	5041.24	-94.463	1	0.000999001	0.000999001	0.000999001	0.995005	NA	INJ	1.51096	3.7939
CGGA_D58	Anaplastic Astrocytoma	III	NA	6	1	NA	CGGA	NA	NA	NA	NA	NA	NA	NA	NA	NA	NA	NA	NA	0.823749	3.49185
CGGA_D59	GBM	IV	IDHmut-non-codel	91.3	0	NA	CGGA	NA	NA	NA	NA	NA	NA	NA	NA	NA	NA	NA	NA	0.485427	4.00809
CGGA_J023	Anaplastic Oligodendrolgioma	III	IDHmut-non-codel	33.8	1	NA	CGGA	NA	NA	NA	NA	NA	NA	NA	NA	NA	NA	NA	NA	-0.0588937	4.74524
CGGA_J024	Astrocytoma	II	IDHmut-non-codel	92.1	0	NA	CGGA	NA	NA	NA	NA	NA	NA	NA	NA	NA	NA	NA	NA	0.731183	4.00899
CGGA_J030	Oligodendroglioma	II	IDHmut-codel	91.2	0	NA	CGGA	NA	NA	NA	NA	NA	NA	NA	NA	NA	NA	NA	NA	-0.434403	5.12557
CGGA_J042	Astrocytoma	II	IDHmut-non-codel	46.3	1	NA	CGGA	NA	NA	NA	NA	NA	NA	NA	NA	NA	NA	NA	NA	2.43296	4.20867
CGGA_J100	GBM	IV	IDHmut-non-codel	NA	NA	NonAltered	CGGA	NA	NA	NA	NA	NA	NA	NA	NA	NA	NA	NA	NA	0.0703893	4.13586
CGGA_J130	Astrocytoma	II	IDHwt	92.3	0	NonAltered	CGGA	NA	NA	NA	NA	NA	NA	NA	NA	NA	NA	NA	NA	0.485427	3.86196
CGGA_J50	Oligoastrocytoma	II	NA	55.7	1	NA	CGGA	NA	NA	NA	NA	NA	NA	NA	NA	NA	NA	NA	NA	0.286881	3.62994
CGGA_J73	Anaplastic Oligodendrolgioma	III	NA	37.3	1	NA	CGGA	NA	NA	NA	NA	NA	NA	NA	NA	NA	NA	NA	NA	-0.168123	3.46467
CGGA_P100	GBM	IV	IDHwt	8.8	1	NonAltered	CGGA	3525.09	2184.95	5155.31	3085.48	3009.56	0.000999001	1	1	0.678322	0.002997	PN	DEV	2	3.05311
CGGA_P102	GBM	IV	IDHmut-non-codel	41.7	1	NonAltered	CGGA	NA	NA	NA	NA	NA	NA	NA	NA	NA	NA	NA	NA	2.62994	3.74416
CGGA_P103	Oligodendroglioma	II	IDHmut-codel	42.2	0	NonAltered	CGGA	NA	NA	NA	NA	NA	NA	NA	NA	NA	NA	NA	NA	-0.761213	4.12102
CGGA_P104	Anaplastic Oligoastrocytoma	III	NA	5.5	1	NonAltered	CGGA	NA	NA	NA	NA	NA	NA	NA	NA	NA	NA	NA	NA	-0.217591	3.1811
CGGA_P106	GBM	IV	IDHwt	2.3	1	NA	CGGA	NA	NA	NA	NA	NA	NA	NA	NA	NA	NA	NA	NA	3.86888	3.30305
CGGA_P107	Astrocytoma	II	IDHmut-non-codel	NA	NA	NonAltered	CGGA	NA	NA	NA	NA	NA	NA	NA	NA	NA	NA	NA	NA	0.918386	4.04527
CGGA_P108	Anaplastic Astrocytoma	III	IDHwt	42	0	Altered	CGGA	4216.73	2023.4	5742.5	-325.498	3292.67	0.000999001	1	0.857143	1	0.000999001	PN	DEV	0.298658	3.55213
CGGA_P109	GBM	IV	IDHmut-non-codel	13.4	1	NA	CGGA	NA	NA	NA	NA	NA	NA	NA	NA	NA	NA	NA	NA	0.970854	2.86987
CGGA_P11	Astrocytoma	II	IDHmut-non-codel	14.2	0	NA	CGGA	NA	NA	NA	NA	NA	NA	NA	NA	NA	NA	NA	NA	2.76341	2.99095
CGGA_P110	Anaplastic Oligodendrolgioma	III	IDHwt	26.3	1	NonAltered	CGGA	3751.9	2379.25	5010.91	2556.51	4945.12	0.000999001	1	1	0.928072	0.000999001	PN	DEV	1.0072	3.8953
CGGA_P111	Oligodendroglioma	II	IDHmut-codel	41.8	0	NonAltered	CGGA	NA	NA	NA	NA	NA	NA	NA	NA	NA	NA	NA	NA	-0.200913	4.01078
CGGA_P112	GBM	IV	IDHwt	27.4	1	NonAltered	CGGA	3994.78	2656.63	6628.12	272.342	2708.4	0.000999001	1	0.041958	1	0.00699301	PN	DEV	0.214125	3.45418
CGGA_P113	Astrocytoma	II	IDHwt	44.1	0	NonAltered	CGGA	4058.11	2392.22	6508.6	-728.183	2827.17	0.000999001	1	0.0759241	1	0.004995	PN	DEV	-0.321928	3.37712
CGGA_P114	Oligodendroglioma	II	IDHmut-codel	NA	1	NonAltered	CGGA	NA	NA	NA	NA	NA	NA	NA	NA	NA	NA	NA	NA	-0.454032	4.42089
CGGA_P115	Astrocytoma	II	NA	41.5	0	NonAltered	CGGA	NA	NA	NA	NA	NA	NA	NA	NA	NA	NA	NA	NA	0.321928	2.4489
CGGA_P116	GBM	IV	NA	10	1	NonAltered	CGGA	NA	NA	NA	NA	NA	NA	NA	NA	NA	NA	NA	NA	-0.395929	3.12763
CGGA_P121	Astrocytoma	II	IDHwt	40.9	0	NonAltered	CGGA	3455.37	2066.19	4551.12	62.3113	2973.64	0.000999001	1	1	1	0.002997	PN	DEV	-0.535332	2.12433
CGGA_P122	Oligodendroglioma	II	IDHmut-codel	41.9	0	NonAltered	CGGA	NA	NA	NA	NA	NA	NA	NA	NA	NA	NA	NA	NA	0.704872	3.78764
CGGA_P128	Astrocytoma	II	IDHmut-non-codel	40.2	0	NonAltered	CGGA	NA	NA	NA	NA	NA	NA	NA	NA	NA	NA	NA	NA	-0.304006	4.06695
CGGA_P13	Oligodendroglioma	II	IDHmut-codel	51.6	0	NA	CGGA	NA	NA	NA	NA	NA	NA	NA	NA	NA	NA	NA	NA	-0.621488	3.99005
CGGA_P131	Anaplastic Oligodendrolgioma	III	IDHmut-codel	40.5	0	NonAltered	CGGA	NA	NA	NA	NA	NA	NA	NA	NA	NA	NA	NA	NA	-0.454032	3.94111
CGGA_P132	Oligodendroglioma	II	IDHmut-codel	40.8	0	NonAltered	CGGA	NA	NA	NA	NA	NA	NA	NA	NA	NA	NA	NA	NA	-0.120294	4.61765
CGGA_P136	GBM	IV	NA	27.7	1	NA	CGGA	NA	NA	NA	NA	NA	NA	NA	NA	NA	NA	NA	NA	0.378512	3.74524
CGGA_P137	Astrocytoma	II	IDHmut-non-codel	38.3	0	Altered	CGGA	NA	NA	NA	NA	NA	NA	NA	NA	NA	NA	NA	NA	-0.234465	4.2426
CGGA_P142	Anaplastic Oligodendrolgioma	III	IDHmut-codel	39.3	0	NonAltered	CGGA	NA	NA	NA	NA	NA	NA	NA	NA	NA	NA	NA	NA	-0.395929	3.46205
CGGA_P143	GBM	IV	IDHwt	8.6	1	NonAltered	CGGA	2338.26	3919.95	6355.7	7445.6	-1514.82	1	0.000999001	0.171828	0.000999001	1	MES	INJ	3.0197	3.86987
CGGA_P144	Anaplastic Astrocytoma	III	IDHmut-non-codel	39.3	0	NonAltered	CGGA	NA	NA	NA	NA	NA	NA	NA	NA	NA	NA	NA	NA	-0.286304	3.89142
CGGA_P145	Astrocytoma	II	IDHmut-non-codel	10.1	1	NA	CGGA	NA	NA	NA	NA	NA	NA	NA	NA	NA	NA	NA	NA	-0.0439433	2.71149
CGGA_P146	Astrocytoma	II	IDHmut-non-codel	11.3	0	NA	CGGA	NA	NA	NA	NA	NA	NA	NA	NA	NA	NA	NA	NA	-0.454032	3.89724
CGGA_P147	Astrocytoma	II	IDHmut-non-codel	28.4	1	NonAltered	CGGA	NA	NA	NA	NA	NA	NA	NA	NA	NA	NA	NA	NA	1.51096	3.99095
CGGA_P15	GBM	IV	NA	23.8	1	NA	CGGA	NA	NA	NA	NA	NA	NA	NA	NA	NA	NA	NA	NA	0.367371	3.21878
CGGA_P150	Astrocytoma	II	IDHmut-non-codel	11.5	0	NonAltered	CGGA	NA	NA	NA	NA	NA	NA	NA	NA	NA	NA	NA	NA	-0.666576	3.93452
CGGA_P151	Astrocytoma	II	IDHmut-non-codel	40.1	0	NonAltered	CGGA	NA	NA	NA	NA	NA	NA	NA	NA	NA	NA	NA	NA	0.0285692	2.55336
CGGA_P153	Astrocytoma	II	NA	36.9	0	NonAltered	CGGA	NA	NA	NA	NA	NA	NA	NA	NA	NA	NA	NA	NA	-0.0439433	2.95791
CGGA_P154	GBM	IV	NA	NA	NA	NA	CGGA	NA	NA	NA	NA	NA	NA	NA	NA	NA	NA	NA	NA	0.214125	3.64386
CGGA_P155	Astrocytoma	II	IDHwt	36.9	0	NonAltered	CGGA	4076.82	2467.79	7189.6	423.183	2376.68	0.000999001	1	0.000999001	1	0.025974	CL	DEV	0.956057	3.08066
CGGA_P156	Oligodendroglioma	II	IDHmut-codel	37	0	NonAltered	CGGA	NA	NA	NA	NA	NA	NA	NA	NA	NA	NA	NA	NA	-0.810966	3.45154
CGGA_P157	Anaplastic Astrocytoma	III	IDHwt	15.5	1	Altered	CGGA	3845.24	2492.72	7907.67	151.793	1904.62	0.000999001	1	0.000999001	1	0.125874	CL	DEV	1	2.85997
CGGA_P158	Oligoastrocytoma	II	NA	37.7	0	NonAltered	CGGA	NA	NA	NA	NA	NA	NA	NA	NA	NA	NA	NA	NA	-0.321928	2.3978
CGGA_P159	Anaplastic Astrocytoma	III	IDHwt	6.9	1	NonAltered	CGGA	3326.79	2929.13	8001.53	1012	-824.965	0.001998	0.0549451	0.000999001	1	1	CL	DEV	0.485427	3.26153
CGGA_P16	GBM	IV	IDHmut-codel	14.7	0	NA	CGGA	NA	NA	NA	NA	NA	NA	NA	NA	NA	NA	NA	NA	0.918386	4.57531
CGGA_P160	GBM	IV	IDHwt	7.2	1	NonAltered	CGGA	2675.29	3751.76	6397.53	6449.73	-64.9929	1	0.000999001	0.141858	0.000999001	0.994006	MES	INJ	3.03738	3.13586
CGGA_P163	Anaplastic Oligodendrolgioma	III	IDHmut-non-codel	28.1	1	NonAltered	CGGA	NA	NA	NA	NA	NA	NA	NA	NA	NA	NA	NA	NA	-0.136062	4.24565
CGGA_P164	GBM	IV	NA	39.1	0	NonAltered	CGGA	NA	NA	NA	NA	NA	NA	NA	NA	NA	NA	NA	NA	0.176323	1.95233
CGGA_P165	Anaplastic Oligoastrocytoma	III	NA	19.7	1	NonAltered	CGGA	NA	NA	NA	NA	NA	NA	NA	NA	NA	NA	NA	NA	0.137504	3.04963
CGGA_P17	Anaplastic Oligodendrolgioma	III	IDHmut-codel	51.3	0	NA	CGGA	NA	NA	NA	NA	NA	NA	NA	NA	NA	NA	NA	NA	-0.888969	4.17632
CGGA_P172	Anaplastic Astrocytoma	III	NA	36.4	0	NonAltered	CGGA	NA	NA	NA	NA	NA	NA	NA	NA	NA	NA	NA	NA	0.15056	2.51349
CGGA_P173	Astrocytoma	II	IDHmut-non-codel	35.7	0	NonAltered	CGGA	NA	NA	NA	NA	NA	NA	NA	NA	NA	NA	NA	NA	-0.321928	4.73715
CGGA_P174	Oligodendroglioma	II	IDHmut-codel	36.8	0	NonAltered	CGGA	NA	NA	NA	NA	NA	NA	NA	NA	NA	NA	NA	NA	0.978196	4.19377
CGGA_P175	GBM	IV	NA	6	1	NonAltered	CGGA	NA	NA	NA	NA	NA	NA	NA	NA	NA	NA	NA	NA	-0.888969	1.64616
CGGA_P176	Oligodendroglioma	II	IDHmut-codel	26.4	0	NonAltered	CGGA	NA	NA	NA	NA	NA	NA	NA	NA	NA	NA	NA	NA	-0.643856	4.73715
CGGA_P177	Astrocytoma	II	IDHwt	35.5	0	NonAltered	CGGA	3905.46	2111.57	6397.38	292.869	4177.16	0.000999001	1	0.141858	1	0.000999001	PN	DEV	0.124328	4.01436
CGGA_P178	GBM	IV	NA	35.5	0	NonAltered	CGGA	NA	NA	NA	NA	NA	NA	NA	NA	NA	NA	NA	NA	-0.454032	2.7866
CGGA_P179	Astrocytoma	II	IDHmut-non-codel	35.9	0	NonAltered	CGGA	NA	NA	NA	NA	NA	NA	NA	NA	NA	NA	NA	NA	-0.810966	4.35755
CGGA_P18	Anaplastic Astrocytoma	III	IDHmut-non-codel	12.7	1	NA	CGGA	NA	NA	NA	NA	NA	NA	NA	NA	NA	NA	NA	NA	0.0285692	4.58556
CGGA_P180	GBM	IV	NA	8.5	1	NonAltered	CGGA	NA	NA	NA	NA	NA	NA	NA	NA	NA	NA	NA	NA	-0.0144996	2.12102
CGGA_P181	Anaplastic Astrocytoma	III	IDHwt	7.8	1	NonAltered	CGGA	3734.78	2482.94	5998.09	348.367	2274.99	0.000999001	1	0.602398	1	0.032967	PN	DEV	-0.0439433	4.09761
CGGA_P182	GBM	IV	IDHwt	37.8	0	NonAltered	CGGA	NA	NA	NA	NA	NA	NA	NA	NA	NA	NA	NA	NA	3.59694	2.854
CGGA_P183	Anaplastic Oligodendrolgioma	III	IDHmut-codel	37.8	0	NonAltered	CGGA	NA	NA	NA	NA	NA	NA	NA	NA	NA	NA	NA	NA	-0.643856	4.25852
CGGA_P185	Anaplastic Astrocytoma	III	IDHmut-non-codel	16.5	1	NonAltered	CGGA	NA	NA	NA	NA	NA	NA	NA	NA	NA	NA	NA	NA	0.250962	4.64847
CGGA_P19	Astrocytoma	II	IDHmut-non-codel	51.1	0	NA	CGGA	NA	NA	NA	NA	NA	NA	NA	NA	NA	NA	NA	NA	-0.0588937	4.05224
CGGA_P199	GBM	IV	IDHwt	6.7	1	NA	CGGA	NA	NA	NA	NA	NA	NA	NA	NA	NA	NA	NA	NA	2.74631	2.52105
CGGA_P20	Astrocytoma	II	IDHmut-non-codel	51.1	0	NA	CGGA	NA	NA	NA	NA	NA	NA	NA	NA	NA	NA	NA	NA	-0.37707	4.01525
CGGA_P205	GBM	IV	NA	19.2	1	NonAltered	CGGA	NA	NA	NA	NA	NA	NA	NA	NA	NA	NA	NA	NA	-0.514573	2.38681
CGGA_P21	Astrocytoma	II	IDHmut-non-codel	51.1	0	NA	CGGA	NA	NA	NA	NA	NA	NA	NA	NA	NA	NA	NA	NA	0.443607	2.09761
CGGA_P22	GBM	IV	IDHwt	13.3	1	NA	CGGA	3541.1	2003.16	6827.68	79.6124	1360.92	0.000999001	1	0.00599401	1	0.432567	CL	DEV	-0.168123	2.66676
CGGA_P23	Anaplastic Astrocytoma	III	NA	12.9	1	NA	CGGA	NA	NA	NA	NA	NA	NA	NA	NA	NA	NA	NA	NA	-0.535332	2.67129
CGGA_P25	GBM	IV	NA	4.8	1	NA	CGGA	NA	NA	NA	NA	NA	NA	NA	NA	NA	NA	NA	NA	0.687061	1.70929
CGGA_P265	Anaplastic Astrocytoma	III	NA	25.6	1	NonAltered	CGGA	NA	NA	NA	NA	NA	NA	NA	NA	NA	NA	NA	NA	0.0703893	1.26903
CGGA_P266	Anaplastic Astrocytoma	III	NA	8.3	1	Altered	CGGA	NA	NA	NA	NA	NA	NA	NA	NA	NA	NA	NA	NA	-0.621488	2.9486
CGGA_P269	Anaplastic Oligodendrolgioma	III	NA	16.8	1	NA	CGGA	NA	NA	NA	NA	NA	NA	NA	NA	NA	NA	NA	NA	1.07039	3.38543
CGGA_P27	Astrocytoma	II	IDHmut-non-codel	13.6	0	NA	CGGA	NA	NA	NA	NA	NA	NA	NA	NA	NA	NA	NA	NA	-0.286304	3.8885
CGGA_P270	Astrocytoma	II	IDHmut-non-codel	10.6	1	NonAltered	CGGA	NA	NA	NA	NA	NA	NA	NA	NA	NA	NA	NA	NA	-0.454032	4.36667
CGGA_P271	Astrocytoma	II	NA	33.3	0	NonAltered	CGGA	NA	NA	NA	NA	NA	NA	NA	NA	NA	NA	NA	NA	-0.434403	2.9542
CGGA_P279	Anaplastic Oligodendrolgioma	III	IDHmut-codel	32	0	NA	CGGA	NA	NA	NA	NA	NA	NA	NA	NA	NA	NA	NA	NA	-0.836501	2.71589
CGGA_P28	GBM	IV	IDHwt	3.5	1	NA	CGGA	3394.45	2883.07	6444.27	3764.55	1878.64	0.000999001	0.313686	0.106893	0.192807	0.135864	CL	DEV	2.21723	3.87971
CGGA_P280	GBM	IV	IDHwt	32.2	0	NA	CGGA	NA	NA	NA	NA	NA	NA	NA	NA	NA	NA	NA	NA	0.163499	2.36737
CGGA_P283	GBM	IV	IDHwt	31.8	0	NA	CGGA	NA	NA	NA	NA	NA	NA	NA	NA	NA	NA	NA	NA	1.0635	2.83188
CGGA_P286	Oligodendroglioma	II	IDHmut-codel	21.6	0	NA	CGGA	NA	NA	NA	NA	NA	NA	NA	NA	NA	NA	NA	NA	-0.251539	2.58015
CGGA_P29	Anaplastic Oligoastrocytoma	III	NA	3.4	1	NA	CGGA	NA	NA	NA	NA	NA	NA	NA	NA	NA	NA	NA	NA	-0.286304	3.33771
CGGA_P295	GBM	IV	IDHwt	9	1	NA	CGGA	NA	NA	NA	NA	NA	NA	NA	NA	NA	NA	NA	NA	0.475085	2.72683
CGGA_P298	Anaplastic Oligodendrolgioma	III	IDHmut-codel	20.8	0	NA	CGGA	NA	NA	NA	NA	NA	NA	NA	NA	NA	NA	NA	NA	0.176323	2.74846
CGGA_P3	Anaplastic Oligoastrocytoma	III	NA	57.8	0	NA	CGGA	NA	NA	NA	NA	NA	NA	NA	NA	NA	NA	NA	NA	-0.666576	1.92979
CGGA_P30	Astrocytoma	II	IDHwt	13.3	1	NA	CGGA	2067.84	3277.13	4637.16	4096.9	941.346	1	0.000999001	1	0.0699301	0.729271	MES	INJ	0.910733	3.36737
CGGA_P306	Oligodendroglioma	II	IDHmut-codel	29.4	0	NA	CGGA	NA	NA	NA	NA	NA	NA	NA	NA	NA	NA	NA	NA	-0.120294	3.16993
CGGA_P308	Anaplastic Astrocytoma	III	IDHmut-non-codel	18.5	1	NA	CGGA	NA	NA	NA	NA	NA	NA	NA	NA	NA	NA	NA	NA	0.111031	2.06695
CGGA_P31	Astrocytoma	II	IDHwt	49.8	0	NA	CGGA	3161.74	3224.7	5777.07	4626.71	1082.72	0.701299	0.000999001	0.836164	0.004995	0.649351	MES	INJ	3.26903	2.10769
CGGA_P310	Anaplastic Astrocytoma	III	NA	7.4	1	NA	CGGA	NA	NA	NA	NA	NA	NA	NA	NA	NA	NA	NA	NA	2.75702	1.65535
CGGA_P311	Astrocytoma	II	IDHmut-non-codel	29.1	0	NA	CGGA	NA	NA	NA	NA	NA	NA	NA	NA	NA	NA	NA	NA	1.73985	2.45943
CGGA_P314	Anaplastic Oligodendrolgioma	III	IDHmut-codel	28.8	0	NA	CGGA	NA	NA	NA	NA	NA	NA	NA	NA	NA	NA	NA	NA	0.526069	3.33914
CGGA_P315	Astrocytoma	II	IDHmut-non-codel	14.8	1	NA	CGGA	NA	NA	NA	NA	NA	NA	NA	NA	NA	NA	NA	NA	0.0565835	2.77821
CGGA_P316	Astrocytoma	II	NA	18.6	0	NA	CGGA	NA	NA	NA	NA	NA	NA	NA	NA	NA	NA	NA	NA	0.978196	2.63923
CGGA_P319	Anaplastic Astrocytoma	III	IDHmut-non-codel	28.5	0	NA	CGGA	NA	NA	NA	NA	NA	NA	NA	NA	NA	NA	NA	NA	0.378512	3.9644
CGGA_P326	Anaplastic Astrocytoma	III	IDHmut-non-codel	28.1	0	NA	CGGA	NA	NA	NA	NA	NA	NA	NA	NA	NA	NA	NA	NA	0.333424	3.09085
CGGA_P328	Anaplastic Astrocytoma	III	IDHmut-non-codel	19.1	1	NA	CGGA	NA	NA	NA	NA	NA	NA	NA	NA	NA	NA	NA	NA	2.18903	3.3799
CGGA_P335	GBM	IV	IDHmut-codel	27.6	0	NonAltered	CGGA	NA	NA	NA	NA	NA	NA	NA	NA	NA	NA	NA	NA	1.0635	2.20789
CGGA_P337	Anaplastic Oligodendrolgioma	III	IDHmut-codel	22.7	1	NonAltered	CGGA	NA	NA	NA	NA	NA	NA	NA	NA	NA	NA	NA	NA	0.85599	4.06609
CGGA_P338	Oligodendroglioma	II	IDHwt	27.6	0	NA	CGGA	NA	NA	NA	NA	NA	NA	NA	NA	NA	NA	NA	NA	2.94298	3.46336
CGGA_P346	Astrocytoma	II	IDHmut-non-codel	17.2	0	NA	CGGA	NA	NA	NA	NA	NA	NA	NA	NA	NA	NA	NA	NA	2.08406	2.91265
CGGA_P356	Astrocytoma	II	IDHmut-non-codel	18.7	1	NA	CGGA	NA	NA	NA	NA	NA	NA	NA	NA	NA	NA	NA	NA	-0.340075	3.1127
CGGA_P358	Astrocytoma	II	IDHmut-non-codel	26.6	0	NA	CGGA	NA	NA	NA	NA	NA	NA	NA	NA	NA	NA	NA	NA	1.60407	2.21101
CGGA_P364	Anaplastic Astrocytoma	III	IDHmut-non-codel	16.3	1	NA	CGGA	NA	NA	NA	NA	NA	NA	NA	NA	NA	NA	NA	NA	2.70487	2.22033
CGGA_P385	GBM	IV	IDHwt	24.8	0	NA	CGGA	NA	NA	NA	NA	NA	NA	NA	NA	NA	NA	NA	NA	1.01436	2.86394
CGGA_P388	Anaplastic Astrocytoma	III	IDHmut-non-codel	9.6	1	NonAltered	CGGA	NA	NA	NA	NA	NA	NA	NA	NA	NA	NA	NA	NA	0.85599	3.48414
CGGA_P392	Astrocytoma	II	IDHmut-codel	24.4	0	NonAltered	CGGA	NA	NA	NA	NA	NA	NA	NA	NA	NA	NA	NA	NA	0.575312	4.0798
CGGA_P399	Oligodendroglioma	II	IDHmut-codel	24.1	0	NA	CGGA	NA	NA	NA	NA	NA	NA	NA	NA	NA	NA	NA	NA	0.918386	3.56925
CGGA_P401	GBM	IV	IDHmut-non-codel	25.9	1	NonAltered	CGGA	NA	NA	NA	NA	NA	NA	NA	NA	NA	NA	NA	NA	2.35614	4.25852
CGGA_P411	GBM	IV	IDHmut-non-codel	14.5	1	NonAltered	CGGA	NA	NA	NA	NA	NA	NA	NA	NA	NA	NA	NA	NA	2.68257	3.33914
CGGA_P415	GBM	IV	IDHwt	6.4	1	NonAltered	CGGA	NA	NA	NA	NA	NA	NA	NA	NA	NA	NA	NA	NA	3.852	2.59694
CGGA_P416	Anaplastic Oligodendrolgioma	III	IDHmut-codel	23.3	0	NonAltered	CGGA	NA	NA	NA	NA	NA	NA	NA	NA	NA	NA	NA	NA	0.731183	3.95977
CGGA_P421	Anaplastic Astrocytoma	III	IDHmut-non-codel	10.1	1	NonAltered	CGGA	NA	NA	NA	NA	NA	NA	NA	NA	NA	NA	NA	NA	3.26454	3.27501
CGGA_P422	Oligodendroglioma	II	IDHmut-codel	24	0	NonAltered	CGGA	NA	NA	NA	NA	NA	NA	NA	NA	NA	NA	NA	NA	-0.395929	4.56194
CGGA_P437	Anaplastic Oligodendrolgioma	III	IDHmut-codel	21.8	0	NonAltered	CGGA	NA	NA	NA	NA	NA	NA	NA	NA	NA	NA	NA	NA	-0.286304	4.27798
CGGA_P438	Anaplastic Oligodendrolgioma	III	IDHmut-codel	21.8	0	NonAltered	CGGA	NA	NA	NA	NA	NA	NA	NA	NA	NA	NA	NA	NA	1.23879	4.03474
CGGA_P439	Astrocytoma	II	IDHmut-non-codel	21.7	0	NonAltered	CGGA	NA	NA	NA	NA	NA	NA	NA	NA	NA	NA	NA	NA	3.65191	3.29131
CGGA_P446	Anaplastic Oligodendrolgioma	III	IDHmut-codel	21.2	0	NonAltered	CGGA	NA	NA	NA	NA	NA	NA	NA	NA	NA	NA	NA	NA	-0.217591	4.18031
CGGA_P461	Anaplastic Astrocytoma	III	IDHmut-non-codel	20.6	0	NonAltered	CGGA	NA	NA	NA	NA	NA	NA	NA	NA	NA	NA	NA	NA	1.11103	2.74416
CGGA_P468	Anaplastic Oligodendrolgioma	III	IDHmut-codel	20.1	0	NonAltered	CGGA	NA	NA	NA	NA	NA	NA	NA	NA	NA	NA	NA	NA	0.0285692	3.853
CGGA_P483	Anaplastic Astrocytoma	III	IDHwt	9.8	1	NonAltered	CGGA	NA	NA	NA	NA	NA	NA	NA	NA	NA	NA	NA	NA	0.992768	3.84699
CGGA_P492	Oligodendroglioma	II	IDHmut-codel	18.9	0	NonAltered	CGGA	NA	NA	NA	NA	NA	NA	NA	NA	NA	NA	NA	NA	0.411426	3.73227
CGGA_P499	GBM	IV	IDHwt	NA	NA	NonAltered	CGGA	NA	NA	NA	NA	NA	NA	NA	NA	NA	NA	NA	NA	2.37573	2.9782
CGGA_P5	Anaplastic Astrocytoma	III	IDHmut-non-codel	12.4	1	NA	CGGA	NA	NA	NA	NA	NA	NA	NA	NA	NA	NA	NA	NA	1.56071	3.39917
CGGA_P500	Oligodendroglioma	II	IDHmut-codel	18.6	0	NonAltered	CGGA	NA	NA	NA	NA	NA	NA	NA	NA	NA	NA	NA	NA	-0.152003	4.21956
CGGA_P501	Astrocytoma	II	IDHmut-non-codel	18.5	0	NonAltered	CGGA	NA	NA	NA	NA	NA	NA	NA	NA	NA	NA	NA	NA	0.0703893	3.49313
CGGA_P505	Astrocytoma	II	IDHmut-non-codel	18.4	0	NonAltered	CGGA	NA	NA	NA	NA	NA	NA	NA	NA	NA	NA	NA	NA	-0.535332	2.79701
CGGA_P508	Anaplastic Astrocytoma	III	IDHmut-non-codel	18.2	0	NonAltered	CGGA	NA	NA	NA	NA	NA	NA	NA	NA	NA	NA	NA	NA	-0.395929	3.33199
CGGA_P510	Anaplastic Oligodendrolgioma	III	IDHmut-non-codel	18	0	NonAltered	CGGA	NA	NA	NA	NA	NA	NA	NA	NA	NA	NA	NA	NA	2.37295	3.49825
CGGA_P512	GBM	IV	IDHwt	17.6	0	Altered	CGGA	NA	NA	NA	NA	NA	NA	NA	NA	NA	NA	NA	NA	1.79494	3.74953
CGGA_P520	Anaplastic Oligodendrolgioma	III	IDHmut-codel	17.1	0	NonAltered	CGGA	NA	NA	NA	NA	NA	NA	NA	NA	NA	NA	NA	NA	0.344828	4.16108
CGGA_P568	Anaplastic Oligodendrolgioma	III	IDHmut-codel	7.2	1	NonAltered	CGGA	NA	NA	NA	NA	NA	NA	NA	NA	NA	NA	NA	NA	1.21412	2.99095
CGGA_P585	GBM	IV	IDHwt	14.2	0	NonAltered	CGGA	NA	NA	NA	NA	NA	NA	NA	NA	NA	NA	NA	NA	3.73552	3.77189
CGGA_P594	Anaplastic Astrocytoma	III	IDHwt	2.8	1	NonAltered	CGGA	NA	NA	NA	NA	NA	NA	NA	NA	NA	NA	NA	NA	3.0036	3.849
CGGA_P596	GBM	IV	IDHmut-codel	13.5	0	NonAltered	CGGA	NA	NA	NA	NA	NA	NA	NA	NA	NA	NA	NA	NA	0.226509	2.06005
CGGA_P604	Anaplastic Astrocytoma	III	IDHwt	8.6	1	NonAltered	CGGA	NA	NA	NA	NA	NA	NA	NA	NA	NA	NA	NA	NA	0.910733	3.70044
CGGA_P609	GBM	IV	IDHwt	12.5	0	Altered	CGGA	3379.98	2029.04	5247.51	908.772	3406.6	0.000999001	1	0.999001	1	0.000999001	PN	DEV	1.29866	3.13258
CGGA_P610	GBM	IV	NA	12.3	0	NonAltered	CGGA	NA	NA	NA	NA	NA	NA	NA	NA	NA	NA	NA	NA	2.0321	0.948601
CGGA_P615	Oligodendroglioma	II	IDHmut-codel	NA	NA	NonAltered	CGGA	NA	NA	NA	NA	NA	NA	NA	NA	NA	NA	NA	NA	-0.494109	3.87676
CGGA_P619	GBM	IV	IDHwt	11.6	0	NonAltered	CGGA	NA	NA	NA	NA	NA	NA	NA	NA	NA	NA	NA	NA	2.07724	3.33342
CGGA_P623	Anaplastic Astrocytoma	III	IDHmut-non-codel	NA	NA	NonAltered	CGGA	NA	NA	NA	NA	NA	NA	NA	NA	NA	NA	NA	NA	1.32193	4.09085
CGGA_P625	GBM	IV	IDHmut-non-codel	5.3	1	NonAltered	CGGA	NA	NA	NA	NA	NA	NA	NA	NA	NA	NA	NA	NA	1.9855	3.65992
CGGA_P633	Anaplastic Astrocytoma	III	IDHmut-non-codel	10.8	0	NonAltered	CGGA	NA	NA	NA	NA	NA	NA	NA	NA	NA	NA	NA	NA	0.367371	4.45812
CGGA_P7	GBM	IV	IDHwt	3.6	1	NA	CGGA	NA	NA	NA	NA	NA	NA	NA	NA	NA	NA	NA	NA	4.04089	2.72028
CGGA_P83	Astrocytoma	II	IDHmut-non-codel	43.7	0	NonAltered	CGGA	NA	NA	NA	NA	NA	NA	NA	NA	NA	NA	NA	NA	-0.321928	2.8953
CGGA_P84	Astrocytoma	II	IDHmut-non-codel	43.6	0	NonAltered	CGGA	NA	NA	NA	NA	NA	NA	NA	NA	NA	NA	NA	NA	-0.395929	4.69877
CGGA_P86	Oligodendroglioma	II	IDHmut-codel	43.6	0	NonAltered	CGGA	NA	NA	NA	NA	NA	NA	NA	NA	NA	NA	NA	NA	-1	4.29278
CGGA_P87	GBM	IV	IDHmut-non-codel	7.9	1	NonAltered	CGGA	NA	NA	NA	NA	NA	NA	NA	NA	NA	NA	NA	NA	1.47508	3.40599
CGGA_P89	GBM	IV	IDHwt	9.7	1	NonAltered	CGGA	NA	NA	NA	NA	NA	NA	NA	NA	NA	NA	NA	NA	2.13093	3.88069
CGGA_P93	Astrocytoma	II	IDHmut-non-codel	43.1	0	NA	CGGA	NA	NA	NA	NA	NA	NA	NA	NA	NA	NA	NA	NA	0.400538	3.8679
CGGA_P98	Anaplastic Astrocytoma	III	IDHmut-non-codel	10.4	1	NA	CGGA	NA	NA	NA	NA	NA	NA	NA	NA	NA	NA	NA	NA	-0.0291463	2.29866
CGGA_P99	GBM	IV	IDHmut-non-codel	22.3	0	NonAltered	CGGA	NA	NA	NA	NA	NA	NA	NA	NA	NA	NA	NA	NA	0.495695	2.74846
