# Supplementary material for: NF1 regulates mesenchymal glioblastoma plasticity and aggressiveness through the AP-1 transcription factor FOSL1
Source: eLife. 2021 Aug 17;10:e64846. doi: 10.7554/eLife.64846 (PMC8370767; doi:10.7554/eLife.64846)
Supplement: Supplementary file 5. [file elife-64846-supp5.xlsx]

## Sheet: Table S5
# Supplementary File 5: Gene signatures used for the GSEA analysis
Richards_DEV_2021	Richards_INJ_2021	Wang_MES_2017	Wang_PN_2017	Wang_CL_2017	Schmitt_TNF_2020	Schmitt_hMG_2020	Verhaak_MES_2010	Verhaak_PN_2010	Verhaak_CL_2010	Verhaak_NEU_2010	Phillips_MES_2006	Phillips_PN_2006	Phillips_Proliferative_2006	FOSL1_regulon	OLIG2_regulon
LINC00115	FAM87B	ARPC1B	HN1	PTPRA	IL32	PDK4	LOX	GPR17	EGFR	AGXT2L1	LIF	CDR1	CHAF1B	ABCD1	ABAT
KLHL17	PLEKHN1	S100A11	RAB33A	ELOVL2	NFE2L3	KLF6	FHL2	TMSL8	MEOX2	CCK	PI3	FSTL5	TTC12	ACTN1	AGPAT5
HES4	ISG15	CTSC	HDAC2	MLC1	IL1RAP	GOLGA3	COL1A1	KLRC3	SOCS2	CRYM	SPOCD1	psiTPTE22	E2F7	ACTN4	AKAP12
LINC01342	TNFRSF18	GLIPR1	MYT1	SOX9	ENPP2	PIK3IP1	COL1A2	DCX	NOS2A	MYBPC1	IL32	CSDC2	C4orf47	ADORA2B	ANXA2P1
SCNN1D	MXRA8	NNMT	MTSS1	ARNTL	TNFRSF1A	KDELR3	FCGR2B	PCDH11Y	CDH4	NTSR2	ANGPTL4	KLRC3	NDC80	ADRM1	APBB2
ACAP3	MRPL20	VDR	HOXD3	DENND2A	BCL3	CBX7	AIM1	KLRC4	ELOVL2	GRM3	HK3	ZNF488	NUF2	ADSS	ARC
PUSL1	LOC115110	RGS2	GPR17	BBS1	NTN1	ABHD4	IGFBP6	NR0B1	KCNF1	HPCAL4	SBNO2	SUSD5	CENPN	AHNAK	ART3
CCNL2	TNFRSF14	CTSB	PTTG1	ABLIM1	NFKB2	TIMP1	DCBLD2	HRASLS	PDGFA	TMEM144	TAGLN	LOC650392	RPA3	AHNAK2	ASCL1
MMP23A	MEGF6	TGFBI	KLRC3	PAX6	PSMD5	CCDC113	SERPINE1	RAB33A	CENTD3	GPR22	SERPINE1	DLL3	CENPK	AKR1C3	ATP6V0E2
SLC35E2B	TPRG1L	PLAUR	HRASLS	ZHX3	LGALS1	NAMPT	SRPX2	ERBB3	GRIK1	SERPINI1	FCGR2C	FERMT1	ARNTL2	ANP32A	ATP9B
CFAP74	SMIM1	LY96	TCP1	USP8	HMOX1	SERPINE1	LY96	RP11	CAMK2B	PPP1R1A	MYL9	GALNT13	NEK2	ANPEP	ATXN10
GABRD	CEP104	BCL3	NPPA	PLCG1	NFKBIA	TMEM97	PLAU	C20orf42	ACSBG1	KCNK1	NRP1	NCAM1	IL13RA2	ANXA1	BAALC
PRKCZ	C1orf174	TNFAIP8	PFDN2	CDH4	TIMP1	CRYAB	CLEC2B	CA10	GAS1	VSX1	COL4A2	EPHB1	PLK4	ANXA11	BCAN
PANK4	RNF207	IER3	CA10	RASGRP1	PLLP	GOLT1B	CSTA	MYT1	VAV3	SH3GL2	PDPN	JPH3	CCNE2	ANXA2	BCAR3
HES5	ICMT	PRSS23	EPHB1	ACSBG1	SFRP1	BCL6	BNC2	SOX10	RGS6	HPCA	COL4A1	DOK6	NCAPG	ANXA2P2	BCHE
WRAP73	ACOT7	IL7R	UGT8	CST3	PLAT	SYDE2	THBS1	EPHB1	KLHL4	GABRB2	LOC100132244	SSTR1	HMMR	ANXA2P3	BMP2K
TP73	NOL9	RAB27A	PAK7	BCKDHB	RELB	SGK1	FPRL2	GRID2	MEIS1	DHRS9	TIMP1	STOX1	ASPM	ANXA4	BNC2
DFFB	KLHL21	RUNX1	SLC1A1	LHFP	EBI3	GLRX	MS4A4A	KLRK1	SLC4A4	DYNC1I1	CHI3L1	RASL10A	IFT74	APOBEC3B	C1orf61
PER3	VAMP3	P4HA2	NARF	VAV3	TGFB1	GDA	RAB27A	DLL3	MYO5C	FXYD1	PLA2G5	SNAP91	ANKRD5	ARFRP1	CAST
CA6	UTS2	CYP1B1	DCTN3	ACSL3	NAMPT	NPC2	TGFBI	SOX4	FGFR3	CPNE6	PDLIM4	CNTN3	WDHD1	ARPC1B	CCDC28B
LOC100506022	TNFRSF9	BACE2	SMPD3	EYA2	SERPINE1	UFM1	COL5A1	DNM3	KLHDC8A	SLCO1A2	NRP2	NDRG2	CDKN2A	ARSA	CCND2
SLC25A33	ERRFI1	ACPP	ZNF804A	SEPT11	NFKB1	GJA3	DSE	PAK3	HS3ST3B1	VIP	EHD2	SOX8	DTL	ATOX1	CD44
TMEM201	SLC2A5	FTL	RASL11B	SLC4A4	BIRC2	PHF24	PLAUR	SLC1A1	DENND2A	FEZF2	FOSL2	SCD	RBM24	ATP1A1	CGREF1
CTNNBIP1	H6PD	SLPI	MYB	SLC20A2	VDR	MCEE	FLJ22662	GPR23	FLJ21963	ADD3	BCL3	LOC254559	TOP2A	AXL	CHST11
KIF1B	SPSB1	RAC2	PDGFRA	C14orf159	NCOA7	CDKN1A	THBD	SCN3A	MAB21L1	CLCA4	RYR3	SMOC1	MLF1IP	B3GNT2	CITED1
PTCHD2	PIK3CD	RARRES1	ERBB3	CTNND1	OSCP1	ZBTB46	IL1R1	CHD7	ZFHX4	LOC201229	UNC93B1	FLJ16779	RAD51AP1	BACE2	COL4A6
MAD2L2	RBP7	SYNGR2	CLGN	ZFHX4	TNFAIP3	EML2	ARPC1B	AMOTL2	EYA2	GRM1	SERPINA1	GFRA1	MELK	BAG3	COL7A1
RNU5E-1	APITD1	THBS1	SOX10	SPRY2	SGK1	COL14A1	P4HA2	SATB1	TRIB2	EDG1	ICAM1	CSMD3	TYMS	BET1L	CREB5
MIIP	DFFA	IL6	BCL11A	ZNF45	SPP1	APOL2	NCF2	CLGN	NES	EVI2A	FBN1	ATP6V1G2	CRNDE	BFSP1	CSPG4
PRDM2	FBXO2	CAV1	NMU	NCOA1	ELL2	VGF	LAMB1	PCDH11X	B3GALT1	CAMK2G	FES	ENHO	GINS1	CAPN2	CSPG5
TMEM51-AS1	NPPA-AS1	PI3	ZNF643	PLCE1	RDH10	ATP1B2	MVP	CNTN1	SHOX2	NDRG2	SOCS3	GABBR1	RRM2	CAST	CYP1B1
TMEM51	KIAA2013	CDCP1	CDKN1C	DTNA	AHR	LDLR	PSCDBP	TMEFF1	CREB5	ANKRD46	S100A11	SCG3	KIAA0101	CAV1	DBI
UQCRHL	PLOD1	ITGB1	JPH3	POLRMT	PHF24	APOE	IFI30	TOX3	WSCD1	CHN1	HSD3B7	NTRK2	SHOX2	CAV2	DNAH9
FLJ37453	TNFRSF8	LOX	PCDHA9	SALL1	EGR2	BST2	COL8A2	NOL4	RASGRP1	KCNJ3	SERPINH1	GABBR2	GINS2	CBX7	DUSP6
SPEN	TNFRSF1B	CD72	IL1RAPL1	TYK2	NR4A1	YIPF2	CNN2	FAM77C	FZD3	CA4	RAB34	LRRC4	ECT2	CD44	ELL2
CLCNKA	DHRS3	COL1A2	MAST1	TJP1	BATF3	ACSS2	TIMP1	LRRTM4	IRS2	CRYL1	ACTN1	RUNDC3A	HSPB11	CD46	ENDOG
SPATA21	MIR6730	ANPEP	VIPR2	MEOX2	ZNF468	C1QL1	MAFB	WASF1	SPRY2	PPP2R5A	C22orf26	TMEM100	ZNF367	CDC42EP3	ETV5
CROCCP3	EFHD2	MMP7	SIM2	FGFR3	CDKN1A	AOC2	SLAMF8	DGKI	SOX9	TSNAX	METTL7B	SMAD9	C6orf173	CDKN1B	FAM114A1
NBPF1	DNAJC16	SPAG4	BAMBI	STXBP3	IRF1	MATN2	FER1L3	NKX2?2	CDH6	FUT9	ANGPT2	SPHKAP	FANCI	CEBPB	FAM131B
CROCCP2	AGMAT	BNC2	PKMYT1	GRIK1	CITED1	CHI3L1	ADAM12	C6orf134	ACSL3	ANXA3	FAM20C	ZDHHC22	MAD2L1	CHD7	FEZ1
MST1P2	FBLIM1	NDRG1	PLCB4	GATM	RRAS	PMP2	C5AR1	GNG4	SEMA6D	ACYP2	PMEPA1	FAM13C	EMP2	CLIC1	FRMPD1
MST1L	CLCNKB	CNN2	SLC17A6	UPF1	SYNGR3	EMP1	NRP1	ZNF804A	LFNG	SLC30A10	ANPEP	DPP10	PDK1	CLIP4	FSCN1
IGSF21	EPHA2	LUM	KLRK1	NPEPL1	LIF	AHNAK	LAIR1	PAK7	ITGA7	CASQ1	RUNX1	PCSK6	EZH2	COL18A1	FSTL1
AKR7L	MFAP2	PTGS2	CENPJ	KIAA0494	VGF	TMEM231	S100A11	PDE10A	SLC6A11	FLJ22655	GGN	REPS2	ERCC6L	COL6A2	FZD7
AKR7A3	ATP13A2	COL3A1	NHLH1	RBCK1	PDGFRL	LIN7A	TNFAIP8	IL1RAPL1	ADAM19	NSL1	SLC39A8	SLC25A21	TTK	COQ10B	GAB1
LOC100506730	PADI2	COL5A1	GABRB3	PHKB	NECTIN2	TMCC3	CTSC	SOX11	ABCD2	MBP	LZTS1	NKAIN4	CCNB1	CRIM1	GAS1
RAP1GAP	PADI1	SDC1	KLRC4	SLC3A2	PXDN	LIPG	C1orf38	C1orf106	TLE2	SLC31A2	EMP3	LUZP2	HAUS1	CRTAM	GCNT1
WNT4	PADI3	COL1A1	KCNK3	PPARGC1A	RHPN2	MSMO1	SQRDL	CRMP1	MLC1	SEPP1	MYH9	GAD1	FBXO11	CSRP1	GLDC
C1orf234	PADI4	GPRC5A	GRID2	PNPLA6	EMILIN2	ADGRD1	LY75	CXXC4	MEGF8	IMPA1	LRRC32	SNRPN	CKS2	CTNND2	GNAZ
ZNF436-AS1	ACTL8	COL15A1	DACH1	MYO5C	PTPRE	PDGFRB	DAB2	C1QL1	BLM	ZNF323	CA12	PDE2A	CENPI	CUL7	GNG7
E2F2	KLHDC7A				AC087289.1	MTUS1	MAN2A1	MLLT11	QTRT1	YPEL5	LRRC29	GRID1	ABCA5	CXXC4	GOLM1
PDIK1L	IFFO2				MATN2	WIPI1	CTSB	P2RX7	LMO2	SEPW1	TNFRSF10D	SGCG	C1orf97	CYB561	GPD1L
FAM110D	EMC1				CHI3L1	RPE65	ITGA5	STMN4	CDK6	UROS	PLEKHF1	GNAL	KIF23	CYBRD1	GPR19
CNKSR1	CAPZB				IRAK2	HSD3B7	LTBP2	KIF21B	LRRC16	MRPL49	ACTA2	OLIG2	XRCC4	DCBLD2	GPR68
LOC101928324	NBL1				CABLES1	CD44	FCGR2A	OLIG2	TGIF2	CRBN	NEURL2	ALDH5A1	MCM2	DEGS1	GPRC5B
ARID1A	TMCO4				EMP1	LIFR	MAN1A1	GRIA2	ZNF211	THTPA	PLAUR	KCTD4	DBF4	DLX2	HES1
TRNP1	UBXN10				ANXA1	SC5D	MSR1	MCM10	LHFP	TTPA	DLC1	TIMP4	CCDC138	DNAJC10	HIP1
TMEM222	CDA				ADAM19	ICAM1	STAB1	DUSP26	CD97	FBXO3	SHC1	OPCML	DHFR	DRAM1	HLA-DPA1
RPA2	PINK1-AS				CD63	ARRDC3	LTBP1	FLRT1	PIPOX	LYRM1	ITGA7	ACSM5	HJURP	DRAP1	HOMER1
PHACTR4	DDOST				PNKD	RUNX1T1	SAT1	ALCAM	SIPA1L1	SH3GL3	SLC25A37	SH3GL2	DSN1	DSTN	IDH1
RNU11	ECE1				DRAM1	BCAM	TES	PLCB4	ZNF264	RND1	PAPPA	C1QL1	KIF14	ECM1	IFFO1
SDC3	LDLRAD2				RIPK1	RCN3	ITGA4	FGF9	GNG7	MAT2B	FLNA	WDR86	EXOSC9	EDEM1	IL1A
NKAIN1	HSPG2				IER3	VASH2	TNFAIP3	CRB1	ITGB8	MGST3	HOMER3	JPH4	FBXO5	EMP1	IRF1
SERINC2	EPHB2				ITGAV	EPHX1	S100A4	LPHN3	ZNF228	CRYZL1	THBD	BCAN	TRMT6	EMP3	IRS1
COL16A1	LUZP1				KLHL5	EPHA5	TCIRG1	STMN1	PLA2G5	GUK1	C1RL	DLL1	SMC4	EPHA2	KANK1
ADGRB2	HTR1D				OPTN	MYCN	LCP1	FHOD3	ZNF419	SNCG	LPAR1	FAM133A	NPHP1	ESYT1	LAPTM4B
MIR4254	ZNF436				PLEKHA4	MYO5B	IL4R	KIAA1166	CDH2	ENPP2	PLAU	TNKS2	DLGAP5	ETHE1	LEPROTL1
CCDC28B	TCEA3				IL27RA	SLC26A2	CDCP1	HN1	EXTL3	CCDC121	SLC22A18	FGF14	CHEK1	EXOC3	LGI2
IQCC	FUCA1				CD44	FBXO32	CASP4	SORCS3	ZNF227	AKR7A3	PARP10	CALN1	GGH	FADD	LMF1
MARCKSL1	IFNLR1				LIFR	LAPTM5	PTPRC	PHF16	FBXO17	TCEAL1	SLC16A3	NRG3	CCNA2	FADS3	MAP2
FAM229A	NCMAP				OSBPL5	MERTK	CD14	YPEL1	ZNF134	EDIL3	VWA1	ARPP21	YEATS4	FAH	MAP2K5
ZBTB8B	CLIC4				AP002956.1	FZD5	LAPTM5	MMP16	LAMB2	GABARAPL2	LOC255783	RAC3	MDFIC	FBRS	MAP3K1
RBBP4	LDLRAP1				GUCY1B1	PRICKLE2	CD4	LRP6	AKT2	COX5B	OSMR	THRA	SLC25A24	FHL2	MARCKSL1
S100PBP	PAQR7				FGF2	DTX3L	SHC1	LOC81691	SEMA6A	PDE6D	BHLHE40	RIPPLY2	CDC2	FLII	MFAP2
FNDC5	SH3BGRL3				CNTNAP1	CAMK2D	PLS3	CDC7	CLIP2	KIAA1598	TNC	MPPE1	NUSAP1	FLNA	MMP16
HPCA	CD52				FOSL2	PDP1	TLR2	RAP2A	CENTD1	MDH1	MMP14	KIF21B	DONSON	FOSL2	MYO1C
ZNF362	AIM1L				ICAM1	TTC39B	ARSJ	BCL7A	NR2E1	ORC4L	TWF1	OVOL1	ZWILCH	FOXC1	MYOF
DLGAP3	SFN				APBA1	PGM2L1	NCF4	ZNF711	JAG1	SCHIP1	C1QTNF1	USH1C	TIFA	FOXN3	NDE1
AGO4	GPN2				KIAA1549L	TCP11L2	LCP2	MARCKSL1	MGC2752	CALM2	PVRL2	SEC31B	SGOL2	FURIN	NES
TEKT2	SLC9A1				ARRDC4	COL6A2	PSCD4	FAM125B	PTPRA	PEX19	NCLN	MCF2	ITGA2	FUT9	NFAT5
GRIK3	IFI6				EMP3	EIF2AK3	ACSL1	MTSS1	ZNF606	ATP5F1	CD151	SHD	MND1	FYCO1	NINJ2
MEAF6	SMPDL3B				CSRNP1	SLC50A1	ITGB2	TTC3	PCSK5	USP33	PTRF	NEU4	HAUS6	G6PD	NKX2-2
MIR5581	SNORA73A				OSMR	ARF4	ECGF1	CLASP2	ZNF45	ATP5L	PDLIM7	ZNF804A	PCNA	GBE1	NLGN3
DNALI1	SNORA73B				CDKAL1	FSTL5	FOLR2	HDAC2	SLC12A4	SNX11	ITGA3	C13orf15	CDC6	GEM	NME4
EPHA10	RAB42				PPP1R18	ZNF608	FXYD5	VAX2	ZNF671	MAGEH1	C1R	DSCAML1	CENPA	GFPT2	NOVA1
MANEAL	TMEM200B				NFKBIE	RETREG1	SERPINA1	CASK	PTPN14	TTC1	FLT1	BMP2	TOM1L1	GLIPR1	P4HA2
INPP5B	PTPRU				IGFBP3	POLR3D	GNA15	TMEM35	MCC	ANXA7	TTC38	MAPT	NCAPH	GLRX	PHACTR2
NT5C1A	TINAGL1				CDKN2B	ABCD2	GCNT1	ZNF643	ZNF20	BCAS1	SHROOM3	GLUD1	CHAF1A	GLT8D2	PHLPP1
HPCAL4	SPOCD1				VAX1	FUT1	NPC2	GADD45G	GPR56	NDUFS3	CD97	FGF12	CENPE	GSDMD	PICK1
MYCL	TMEM234				SORBS1	FGFBP3	MYH9	MAP2	CALM1	ARRB1	DEF6	KCNQ5	WDR34	GSTA4	PIK3R2
PPT1	LCK				CARS	PMP22	PDPN	REEP1	HSPBP1	PEX11B	JUNB	GRIA1	MCM6	HSPA5	PLLP
RLF	HDAC1				DUSP6	DNAJB5	CASP1	ZNF286A	GLG1	CDC42	FGG	NALCN	C1orf133	IER3	PNMA2
ZNF684	ZBTB8OS				THY1	KCNK10	ST14	ZNF248	PRKD2	HPRT1	IFITM2	KCNN3	PAWR	IFRD2	PODXL2
RIMS3	SYNC				C10orf90	YPEL2	SLC16A3	PFN2	PEPD	ANKS1B	TRIM47	SLITRK5	CACYBP	IL11	POLR2F
NFYC-AS1	KIAA1522				ADAMTS1	TSC22D3	RAC2	MYB	ARNTL	ROGDI	LOC151300	CALCRL	KIAA0895	IL13RA1	PPFIBP2
KCNQ4	GJB3				MYO5B	CLU	CAST	FAM110B	TMEM161A	PPFIA2	SLC12A9	NRSN1	KNTC1	IL18R1	PRDM8
FOXO6	ZMYM6NB				KLF10	GREM2	BDKRB2	CDK5R1	DMWD	PRPSAP2	FGFRL1	ABLIM3	ACYP1	IMPAD1	PTGER4
RIMKLA	PSMB2				GRAMD2B	A2M	TGFBR2	SEZ6L	GNAS	UGT8	BACE2	LGR5	AURKA	IQGAP1	PTGS2
CCDC30	COL8A2				STOM	TAGLN2	LGALS3	TAF5	NPAS3	ATRNL1	FAM38A	DUSP26	CENPF	ITGA3	PTPRZ1
YBX1	MAP7D1				PCDH1	CRTAP	WWTR1	GSTA4	DLC1	MMD	ITGA5	NET1	BRCA1	ITGA5	QDPR
LOC100129924	EVA1B				NRG1	CLIC2	SIGLEC9	TMEM118	CD151	PLCL1	ESM1	GLUD2	ITGB3BP	ITGA6	RAB27A
LOC339539	LINC01137				MITD1	GCNT4	PTRF	DBN1	LRP5	SIRT5	SGSH	PHYHIPL	RAD51	KCNAB2	RAF1
C1orf210	ZC3H12A				IFNGR2	IRF9	ARHGAP29	PODXL2	TGFB3	REPS2	TPP1	PLCB1	CDCA7	KCND1	RAP1GAP
KDM4A	RHBDL2				ZNF667	TRPM8	TRIM38	NRXN1	ZNF8	FAM49B	OSBPL3	ALDOC	TRIM36	KCND2	RAPGEF4
ST3GAL3	MACF1				IER2	NUPR1	PTPN22	HOXD3	RFXANK	MGC72080	EMP1	CRYAB	TMEM106C	KCNN4	RASL12
ERI3	KIAA0754				MGAT4B	PDXDC1	CTSZ	SEC61A2	JUND	POPDC3	EFEMP2	CMTM5	KIF18A	KDELR3	RASSF2
ERI3-IT1	MFSD2A				LAPTM5	CRELD1	FLJ20273	AOF2	PRPF31	ENPP4	CD248	LOC153811	GCLM	KLHL21	RBBP9
PTCH2	CAP1				FZD5	UBALD2	RBMS1	NCAM1	VPS16	CUTC	RRBP1	FGF13	TMEM79	LGALS1	RBM38
ZSWIM5	CITED4				ADAMTS9	IFITM1	CCR5	RBPJ	RBCK1	MSRB2	PDGFA	FUT9	ZC3HAV1L	LGALS8	RGS20
LINC01144	EDN2				PTX3	KCNA4	HEXB	MMP15	GRIK5	TPM3	MAP2K3	APOE	TMEM38B	LIF	RLBP1
RPS15AP10	HIVEP3				DTX3L	CIB1	CD2AP	ATAD5	ZNF235	SGK3	EPAS1	PRKCZ	KIF4A	LMNA	RRAS2
PIK3R3	ZMYND12				ANKRD33B	THEMIS2	SLC11A1	CSNK1E	TBX2	TCEAL2	HRH1	GABRA3	E2F8	LPP	S100B
FOXE3	PPCS				ACSL6	PTP4A3	MYO1F	ASCL1	GJA1	BEST1	MVP	PKNOX2	ANKRD32	LRRFIP2	SDC2
SKINTL	P3H1				PGM2L1	CSF1	FNDC3B	ZEB2	SEPT11.	PPA1	C15orf52	GRIA2	ORC6L	MAFG	SHC3
SPATA6	SLC2A1				ARHGEF40	TLCD2	ANXA2	HMGB3	TMEM147	PGBD5	STEAP3	OLIG1	SIP1	MAN1A1	SLC10A3
AGBL4	TMEM125				NDUFB8	TMEM173	SLC10A3	TOP2B	IRF3	CDR1	FPR2	KCNB1	HELLS	MAP2	SLC19A3
BEND5	ELOVL1				LARP6	NR4A3	PYGL	PELI1	POMT2	ACSL4	CECR2	ID4	RBBP8	MARCKSL1	SLC38A3
ELAVL4	MED8				GABRB3	SOCS3	LILRB2	ATP1A3	SLC6A9	FHIT	EFNB2	ELMO1	PPIC	MAST1	SLC4A4
RAB3B	KDM4A-AS1				NAB2	JAG2	NOD2	ICK	DAG1	SPAST	GPR116	MAF	RFC4	MCFD2	SLIT2
TXNDC12	ARTN				ZNF267	FTL	LILRB3	TMCC1	ERCC2	MORF4L2	ZYX	CNTN1	SPIN4	MET	SNX27
BTF3L4	KLF17				CDC42EP5	SRPRA	ALOX5	PPM1E	RBM42	AGTPBP1	IFITM3	NTN4	PABPC4L	MGAT1	SOX11
ZFYVE9	PLK3				TRIM8	SEMA4B	RUNX2	TNRC4	POFUT1	NANOS1	ECE1	GABRB3	HMGB2	MGAT4B	SPATA6
PRPF38A	TCTEX1D4				JUNB	SYN3	TNFRSF1B	E2F3	NPEPL1	BASP1	KLF16	RP1135N6.1	C12orf48	MICAL2	SRGN
ZCCHC11	BTBD19				CEBPB	CDHR1	ITGAM	SCG3	SARS2	PARP8	SALL4	P2RX7	RRM1	MOCOS	ST3GAL6
FAM159A	TESK2				KREMEN2	DCAF4L1	IQGAP1	DPF1	ZNF304	SAR1A	TRABD	GRIA4	PRPS2	MT1G	STARD7
ZYG11B	PRDX1				HAS2	AHNAK2	UAP1	EPB41	TMED1	GNAI1	PDGFRL	RASGEF1C	LSM5	MT2A	SYT11
CPT2	TSPAN1				GAP43	F3	KYNU	TOPBP1	LRFN3	EPB41L3	RHOJ	CECR6	MAGOHB	MVP	SYT17
C1orf123	DMBX1				GTSF1	SYNM	RAB32	BCOR	ZNF446	PSCD1	TRIM56	PTGDS	MTF2	MYD88	TBC1D22B
LRP8	MKNK1				ISG20	ATF3	PROCR	BEX1	RGS12	SLC16A7	RRAS	HLF	EFCAB2	MYH9	TBKBP1
CDCP2	MOB3C				CXCL10	IL21R	TNFRSF11A	SPTBN2	BTBD2			RTN1	DEK	MYLK	TIMP4
CYB5RL	CYP4X1				ZIK1	SNX10	SFT2D2	ARHGEF9	RIN1			HSPA12A	C3orf14	MYO1C	TMEM121
SSBP3	PDZK1IP1				SYNPO	VMAC	PTGER4	CAMSAP1L1	FZD7			ADCY2	NUCB2	MYOF	TMEM206
SSBP3-AS1	CMPK1				LRRN3	INSIG1	COPZ2	PAFAH1B3	GLI2			PDK4	BARD1	NSMAF	TMPRSS5
PARS2	FOXD2				ASPHD1	PTGES	ACPP	DPYSL4	SMO			SGSM1	USP1	NT5E	TRAF4
USP24	TRABD2B				CSRP2	CCNG1	CLIC1	NCALD	ANXA5			ASCL1	TTC26	OLFML2B	TRIB2
PPAP2B	OSBPL9				CYLD	CLDN4	RRAS	ZNF184	KEAP1			PHACTR3	LMNB1	P4HA2	TRIM24
JUN	CC2D1B				PMP22	MKNK1	IL15RA	PPM1D	OSBPL3			FRY	TCF19	PARP12	TTYH1
LOC101926964	ECHDC2				RESF1	RGS3	MAN2B1	BCAN	RFX2			HS3ST4	RECQL	PARVA	TUBA1A
NFIA	PODN				RELL1	GPR107	ICAM3	PURG	SCAMP4			RAB11FIP4	GJC1	PARVB	TUBB2B
EFCAB7	SLC1A7				TNIP2	SLC22A18	AMPD3	RALGPS2	CD3EAP			CYFIP2	TMEM14B	PERP	VASH1
DLEU2L	DHCR24				CA8	CISH	ANXA1	SLCO5A1	SNTA1			PSD	ABHD3	PHLDA2	VEGFC
CACHD1	PCSK9				A2M	PKIG	DSC2	FBXO21	C19orf22			PID1	BUB1	PIGT	VGLL4
RAVER2	TACSTD2				TAGLN2	NRCAM	SH2B3	GSK3B	EPHB4			KSR2	C3orf34	PLAU	ZNF544
LINC01359	LINC01358				RAB39A	ACAN	FMNL1	CBX1	KLHL25			RPRM	GMPS	PLAUR	ZYX
MIR3671	NFIA-AS2				COL9A1	CCNB1IP1	CHI3L1	RALGPS1	DOCK6			DSCAM	MLF1	PLCB1
PDE4B	KANK4				SGPP2	PLA2G4C	POLD4	RUFY3	CC2D1A			FLRT1	CCDC34	PLEKHF1
GNG12-AS1	DOCK7				CLIC2	LBHD1	SCPEP1	CDC25A	APBA3			SLIT1	MNS1	PLP2
RPE65	ROR1				EGFLAM	COG6	PTPN6	MARCKS	NDP			ZC3H12B	STIL	PMAIP1
CTH	ROR1-AS1				PODXL	ANKRD20A4	ELF4	GABRA3	FLJ11286			DNM3	EVC2	PNPLA2
FPGT-TNNI3K	JAK1				AC005747.1	MVP	CEBPB	MPPED2	KIAA0355			SEZ6L	SHFM1	PQLC3
SAMD13	LEPROT				TRPM8	ARID5A	DRAM	NRXN2	TRIP6			CRTC1	ZWINT	PRNP
LMO4	SLC35D1				NFKBIZ	SYCP2	WIPF1	ABAT	HMG20B			AP2B1	CEP152	PROCR
BARHL2	GNG12				TNFRSF12A	MAP3K6	VDR	MAPT	TEAD3			ZCCHC24	C1orf112	PRSS23
HFM1	DIRAS3				FAM174B	PJA2	MFSD1	FXYD6	GALNT4			SLITRK2	PPIG	PTGER4
CDC7	DEPDC1				SPSB1	COL6A1	HEXA	LOC55565	NR2F6			P2RY13	CDC25C	PTHLH
LOC100996635	DEPDC1-AS1				IFITM1	AGT	MAPK13	MAST1	SLC2A10			FBXO2	SPC24	PXN
LPPR5	LRRC7				PTP4A3	COQ8A	HK3	RAD21	M6PRBP1			FAM19A5	NASP	PYGB
LOC100129620	PTGER3				CSF1	THBS2	SEC24D	VEZF1	SSH3			C11orf2	E2F1	QSOX1
AMY2B	NEGR1				FAM43A	ACBD3	STAT6	ZNF510	LRP10			HIP1R	CDK2	RAC2
LOC100129138	LRRIQ3				TMEM173	PFKFB2	ANXA4	CDKN1B	PMP22			F2	C17orf75	RAVER2
VAV3	ERICH3				NR4A3	YOD1	CASP5	PHLPP	GSTK1			CCNK	SMC2	RBKS
AKNAD1	CRYZ				SOCS3	NUAK2	STXBP2	ACTR1A	ILK			PLEKHB1	ACN9	RELB
SPATA42	TYW3				SEMA4B	ULBP2	GRN	NLGN3				GGTA1	CENPL	REXO2
GPSM2	SLC44A5				ANO9	LHX9	LGALS1	WDR68				NOG	WEE1	RHBDF2
CLCC1	PIGK				AHNAK2	ZBTB41	MGAT1	CSPG5				HEY2	PPIL5	RHOG
WDR47	AK5				F3	RGS16	FHOD1	MYST2				SCN3A	C3orf15	RIN1
SCARNA2	ZZZ3				ZNF347	EFNA1	DOK3	BAI3				FBXL15	LRIG3	RNFT2
C1orf194	NEXN-AS1				GABRA5	S100A10	RAB11FIP1	MATR3				TMOD2	MAGOH	RNH1
CELSR2	NEXN				GRB10	ITGA10	MRC2	SRGAP3				FXYD6	ATG12	RPS6KA4
PSRC1	FUBP1				DACT1	TENT5C	LHFPL2	SNX26				SLC1A4	CREBZF	RRBP1
MYBPHL	DNAJB4				IL6ST	DUSP5	CLCF1	GPM6A				B3GAT1	PEG10	S100A10
ATXN7L2	GIPC2				NUDT4	SLC16A4	PLK3	SOX2				ABLIM1	EIF1AX	S100A11
AMIGO1	PTGFR				SOD2	PLPPR4	LYPLA3	C1orf61				SORBS1	TIMELESS	S100A13
GPR61	IFI44L				SPRED3	GBP2	TMBIM1	MYO10				TPCN2	PIN4	S100A6
GSTM4	IFI44				SNX10	MOSPD1	VAMP5	TSPAN3				TPM1	TEX9	SDC4
STRIP1	LOC101927560				VWA1	BMP5	RHOG	CKB				IL17D	FANCD2	SEMA4F
LAMTOR5-AS1	CTBS				ZDHHC14	IL13RA1	FURIN	TTYH1				TMEM59L	PRIM2	SERINC3
PROK1	SSX2IP				CLDN4	RAB3B	TGOLN2	DPP6				MMP16	CDKN2C	SERPINB6
KCNA2	MCOLN2				TNC	ARMCX1	ENG					MARCH8	PAIP1	SERPINE1
KCNA3	MCOLN3				RNF19A	PIM1	RABGAP1L					EFHA2	TMPO	SH2B3
DRAM2	WDR63				IL4I1	FABP3	PGCP					FSD1		SH2D4A
OVGP1	SYDE2				MGAT3	TRAF1	ASL					EHD3		SH3BGRL3
C1orf162	BCL10				SH2B3	HABP4	LRRFIP1					SORCS3		SHC1
FAM212B	LOC646626				KLHL6	HLA-E	EMP3					ABHD6		SLC10A3
FAM212B-AS1	CYR61				RGS3	KLF9	ZNF217					DNAJC12		SLC35C1
KCND3	ZNHIT6				WARS	GPR20	C1orf54					KIF5A		SLC38A10
KCND3-IT1	COL24A1				SLC35F6	CIR1	GLT25D1					GRIK4		SLC4A7
LOC643355	ODF2L				PRICKLE1	DCDC2	SYNGR2					SOX6		SMAGP
LINC01356	CLCA2				B2M	SRPX	EFEMP2					RPL13		SQSTM1
LOC100996251	GBP3				NRCAM	ACSL6	ALDH3B1					FAIM2		SRPX2
RSBN1	GBP1				PLA2G4C	PTCHD1	FES					OMG		SSH3
BCL2L15	GBP2				PDGFA	NEDD9	TEC					DTX4		STC1
HIPK1-AS1	GBP7				SMOC2	C9orf72	TNFRSF1A					PKP4		SYNJ2
TRIM33	GBP4				GFRA1	N4BP2L1	TRPM2					EPB41L2		TAPBP
SIKE1	GBP5				ZNF816	IDI1	CASP8					RPL37		TCF4
IGSF3	GBP6				SERTAD1	AC138969.1	TLR4					C12orf53		TFPI2
CD101	GBP1P1				ZNF329	GLIS3	SIGLEC7					GAB2		TIMP1
WARS2-IT1	LRRC8C				RIOX2	SH3BP5	SWAP70					TMLHE		TMED9
PFN1P2	EPHX4				PRKAR1B	MT-TL1	EHD2					KIF1A		TMEM109
SRGAP2C	GFI1				PARP9	MT-TF	BATF					BEND7		TMEM214
SRGAP2B	DR1				DPP4	MT-TC	SP100					AJAP1		TNFRSF10B
GNRHR2	BCAR3				WWTR1	GPX3	CCDC109B					GPR158		TNFRSF12A
RBM8A	GCLM				SQSTM1	SPTB	UCP2					WNT7B		TPD52L2
LIX1L	ABCA4				PIK3CD	TDRKH-AS1	RELB					TRIM31		TPM2
POLR3GL	ARHGAP29				L1CAM	SEC14L1	SYPL1					RASSF4		TRAM2
NBPF11	LINC01057				TIFA	SERPINA3	MGST2					PARD3		TSPAN1
MIR5087	SLC44A3				C1orf198	TAF1D	TRIM22					GNAO1		TSPAN7
LOC100132057	CNN3				AGT	PROS1	BLVRB					SLC1A1		TXN
LINC00869	TMEM56				LPGAT1	SMIM29	TRADD					ATRNL1		UPP1
SV2A	TMEM56-RWDD3				NUAK2	COL11A2	HFE					NUMA1		VASP
VPS45	DPYD				ETNK2	FGD4	RBKS					PCSK1N		VCL
PLEKHO1	MIR137HG				LHX9	SLC30A5	CYBRD1					TTYH1		VDR
CA14	MIR2682				FAM129A	LONRF1	PIGP					TAL1		WDR1
APH1A	LOC729987				RGS16	YPEL3	PHF11					GPRC5B		WDR55
CIART	SNX7				IFNGR1	IFITM2	S100A13					HDAC5		WIPI1
RPRD2	FRRS1				ADAMTS4	SELENOM	YAP1					ARL3		YIF1A
TARS2	HIAT1				CRABP2	C1S						SSTR2		YIPF3
MIR6878	RTCA				RAB13	HDAC9						NAP1L3		ZBTB38
FALEC	VCAM1				S100A10	MAFF						LOC284244		ZMYM4
SETDB1	SLC30A7				CTSS	APOL6						MN1
PRUNE	COL11A1				DUSP5	CITED1						C20orf19
BNIPL	LOC101928436				PLPPR4	TMEM120A						RIMS2
CDC42SE1	NTNG1				GCLM	BCYRN1						ARHGAP22
SEMA6C	SLC25A24				BMP5	BX664727.3						LOC202451
LYSMD1	TAF13				CITED4	GOLGA2						AKR1C1
TMOD4	GNAT2				SDC4	ITGA11						ANKS1B
VPS72	GSTM5				PLAU	KIAA0040						FAM110B
ZNF687	CSF1				ADAMTS14	PLPP5						ASB13
GBAT2	SLC16A4				TRAF1	TXNIP						MAPK8IP2
POGZ	DENND2D				UGCG	HOTAIRM1						PDK2
SNX27	CHI3L2				FZD8	FTLP3						SE
CELF3	TMIGD3				ALPL	AC007566.1						FAM155A
RIIAD1	ADORA3				NBL1	KCNK15-AS1						RGS9
TDRKH	LINC01160				JCAD	C4A						PAR5
RORC	CTTNBP2NL				RASEF	CBS						CBX7
CHTOP	WNT2B				HLA-E	JADE2						IKZF5
SNAPIN	CAPZA1				CEMIP2	PROX1-AS1
NPR1	FAM19A3				KLF5	HMGCS1
SLC27A3	PTPN22				MAOB	BLOC1S3
GATAD2B	OLFML3				ARHGEF16	GOLGA4
DENND4B	DENND2C				BMP2	ANXA11
CREB3L4	CSDE1				CD83	NAMPTP1
CHRNB2	TSPAN2				HIVEP1	ATCAY
LENEP	NGF				PRR16	GXYLT1P3
DCST2	VANGL1				CYP1A1	ZFPL1
LOC100505666	MAB21L3				NPNT	JAK3
EFNA3	TTF2				EMILIN1	TNC
EFNA1	FAM46C				ASB9	DGKI
MIR92B	SPAG17				LOXL2	DRAM2
GBAP1	TBX15				AC024940.2	CBWD5
CLK2	LOC101929147				ZNF28	C1orf162
HCN3	SEC22B				ZNF528	DDR1
ASH1L-AS1	HIST2H2BA				PGBD5	EDEM3
MSTO2P	EMBP1				SLC16A3	PDE4DIP
SYT11	LOC645166				SERPINA3	TMEM50B
ARHGEF2	PDZK1				SYT12	STK19
UBQLN4	RNF115				SLC16A9	TBC1D23
MEX3A	PDIA3P1				ARNTL2	TMEM87B
SEMA4A	ACP6				ETV6	GRIK1
SLC25A44	OTUD7B				TBC1D10A	GOLGB1
PAQR6	CTSS				WIPF3	PIKFYVE
VHLL	CTSK				ARHGEF4	RAB5A
RHBG	ANXA9				APOL6	RAB4A
C1orf61	GABPB2				AL390719.1	PODXL
MIR9-1	TUFT1				HLA-B	PORCN
BCAN	LOC100132111				MICALL2	EEPD1
ARHGEF11	S100A10				AC034228.4	LINC00888
KCNJ10	NBPF18P				SEMA3B	CLIP2
KCNJ9	S100A11				PERP	LYST
ATP1A2	FLG-AS1				IFIH1	TPST1
ATP1A4	KPRP				KIAA0040	CYB561D2
CASQ1	S100A7				INSYN2A	CHN2
NHLH1	S100A6				TAPBP	AKNA
VANGL2	S100A4				C4A	PLSCR4
USF1	LOC101928034				AC132217.1	ERLEC1
USP21	S100A3				BCL6	CCZ1B
PPOX	S100A2				PLEKHF1	FMN2
ADAMTS4	S100A13				U73166.1	AC064799.1
NDUFS2	RAB13				NAMPTP1	UBR5-AS1
CFAP126	TPM3				LRP2	USP51
FCGR2A	ATP8B2				AL590617.2	MAN2A1
HSPA6	IL6R				FTH1P7	OSMR
FCGR2C	SHE				ATCAY	HMGXB3
HSPA7	SHC1				TMEM151B	TRIM7
FCGR3B	SLC50A1				ZNF611	ALPK1
FCGR2B	GBA				TSC22D4	FAM114A1
RPL31P11	FAM189B				CAPN5	AC106795.1
FCRLA	FDPS				C1orf226	TRIQK
FCRLB	LMNA				TAF13	CDKL3
UCK2	GLMP				STAT3	ENO3
POGK	SH2D2A				MPZ	SPARC
TADA1	PEAR1				U52112.2	RDH10
ILDR2	CD5L				ZNF813	FAXDC2
MAEL	KIRREL				ARL6IP5	DNHD1
LINC01363	CD1D				BACE2	AP002387.2
POU2F1	SPTA1				CREB3	TNFRSF1A
CD247	IFI16				RBM3	PPP2R5A
FMO2	DUSP23				RPGR	SLC2A3
GAS5-AS1	SLAMF8				ROBO1	SPTY2D1
ZBTB37	C1orf204				CYP4V2	TBC1D15
LOC101928696	VSIG8				TMEM158	C12orf76
MRPS14	CFAP45				ALPK1	AL049839.2
TNN	SLAMF7				SPARCL1	GOLGA5
TNR	SH2D1B				ERAP1	LGMN
LHX4	UHMK1				CAMK2D	NDRG2
ACBD6	UAP1				ZBED1	MEIS3
STX6	DDR2				FTH1P11	ISG20
IER5	C1orf110				MIR3142HG	PDP2
LOC101928973	RGS4				RNF145	AC100803.2
CACNA1E	RGS5				FAM131B	PMM2
GLUL	CREG1				FADS3	AP003469.4
COLGALT2	RCSD1				AL133352.1	SNHG20
C1orf21	DCAF6				MAP3K11	AC132872.1
SWT1	DPT				FJX1	AC114947.2
LOC102724919	LINC00626				PLCD3	SLC2A4
LINC01351	NME7				C1RL-AS1	GOSR2
CRB1	BLZF1				RAB35	MIR4709
LOC101929224	SELP				SLC2A3	PITPNC1
CAMSAP2	SELL				SOD2	AC080038.1
GPR25	SELE				AL049839.2	AC129492.1
C1orf106	LOC101928650				LINC01686	MALT1
KIF21B	PRRX1				ABR	VMP1
NAV1	MROH9				LIMD2	LMAN1
SHISA4	METTL13				LINC00683	ZFP28
GPR37L1	DNM3OS				RAB31	DBP
ARL8A	TNFSF18				EFTUD2	ZFP36
PPP1R12B	TNFSF4				VMP1	ATG9B
SYT2	PRDX6				ZNF667-AS1	AC100803.3
LOC148709	PAPPA2				PEPD	AL031118.1
KLHL12	LOC730102				ZSWIM4	AC021097.1
TMEM183A	RASAL2-AS1				ZNF766	PPM1K
MYOG	RASAL2				ZNF701	AL359198.1
CHIT1	ABL2				INSR	AL136981.2
LINC01353	SOAT1				ZFP36	GADD45A
LINC01136	FAM163A				STAP2	SRGAP2B
BTG2	QSOX1				CERS1	AC092747.4
PRELP	FLJ23867				KCNN4	AL669942.1
OPTC	LAMC2				IRF3	IL6R
PIK3C2B	NCF2				ZNF730	AC104211.1
MDM4	ARPC5				GRWD1	BANCR
LRRN2	TRMT1L				LRRC4B	RPL37A
KLHDC8A	HMCN1				ORAI1
MFSD4	PRG4				ZNF229
RAB29	PTGS2				SIK1B
SLC41A1	PACERR				DOC2B
SRGAP2	RGS1				CDH4
CAMK1G	GLRX2				TNFRSF9
MIR3122	CDC73				BANCR
LOC101929541	LINC01031
TMEM206	CFH
NSL1	CFHR1
TATDN3	NEK7
FLVCR1	PTPRC
ANGEL2	NR5A2
PROX1-AS1	PKP1
PROX1	TNNT2
KCTD3	LAD1
RAB3GAP2	CSRP1
MARK1	RPS10P7
C1orf115	TIMM17A
2021-03-02	RNPEP
LOC101927164	ELF3
LEFTY1	CYB5R1
PARP1	LOC101929441
ADCK3	LINC00628
ZNF678	RBBP5
RNF187	NUAK2
RHOU	CDK18
DUSP5P1	SLC45A3
CCSAP	SLC26A9
NUP133	CTSE
ABCB10	IKBKE
URB2	DYRK3
PGBD5	MAPKAPK2
COG2	IL24
AGT	PIGR
CAPN9	CD55
FAM89A	CR2
TRIM67	CR1L
C1orf131	CD46
GNPAT	CD34
DISC1	G0S2
DISC1-IT1	HSD11B1
LOC101927765	SERTAD4-AS1
TOMM20	SERTAD4
GNG4	HHAT
GPR137B	VASH2
ACTN2	PTPN14
LOC339529	TGFB2
COX20	MIR548F3
HNRNPU-AS1	EPRS
LOC101928068	HLX
EFCAB2	C1orf140
ZNF670	AIDA
ZNF669	DISP1
ZNF124	TLR5
MIR3916	CCDC185
ZNF496	CAPN2
ZNF672	FBXO28
ZNF692	DEGS1
ZMYND11	CNIH4
DIP2C	CNIH3
ADARB2	ACBD3
ASB13	WNT9A
ANKRD16	GJC2
CELF2	MIR7641-2
DHTKD1	KIAA1804
SEC61A2	KCNK1
CAMK1D	LINC00184
PHYH	LOC101927851
SEPHS1	LINC01348
BEND7	NID1
FAM107B	EDARADD
ACBD7	RYR2
STAM-AS1	LOC100130331
NSUN6	ZP4
ENKUR	GREM2
LINC00836	KMO
LINC00202-1	MAP1LC3C
ACBD5	ADSS
GOLGA2P6	KIF26B
ZEB1-AS1	TFB2M
ZEB1	PFKP
EPC1	PITRM1
ZNF33BP1	LINC00702
ZNF25	LINC00704
LOC100129055	AKR1C3
ZNF37BP	CALML3-AS1
RET	IL15RA
ZNF32-AS2	PFKFB3
TMEM72-AS1	LINC00707
RSU1P2	ITIH2
AGAP4	GATA3-AS1
PARGP1	GATA3
FAM35BP	SFTA1P
GLUD1P7	ECHDC3
BMS1P5	PROSER2-AS1
FAM35DP	OPTN
VSTM4	FRMD4A
AGAP6	OLAH
ASAH2	NMT2
CSTF2T	RSU1
PCDH15	VIM-AS1
LINC00844	ST8SIA6
CCHE1	HACD1
PHYHIPL	NEBL
LRRTM3	NEBL-AS1
ATOH7	CASC10
TET1	LOC100499489
STOX1	C10orf67
TSPAN15	KIAA1217
LRRC20	YME1L1
EIF4EBP2	LRRC37A6P
PALD1	ARMC4
USP54	MPP7
SYNPO2L	SVIL
GLUD1P3	SVILP1
SFTPA2	ITGB1
NUTM2B	NRP1
TMEM254-AS1	BMS1
LOC102723703	RASGEF1A
SH2D4B	C10orf10
GRID1	TIMM23
BMPR1A	ARHGAP22
NUTM2D	CHAT
CFL1P1	PRKG1-AS1
PANK1	DKK1
HECTD2	LINC01468
PPP1R3C	BICC1
FGFBP3	CCDC6
BTAF1	RHOBTB1
TBC1D12	TMEM26
ENTPD1	TMEM26-AS1
ENTPD1-AS1	ARID5B
C10orf131	ZNF365
CC2D2B	NRBF2
RPL13AP5	REEP3
SLIT1	ANXA2P3
ARHGAP19-SLIT1	HERC4
FRAT2	MYPN
MORN4	DDX50
SEC31B	DDX21
SEMA4G	VPS26A
LBX1	SUPV3L1
LBX1-AS1	LOC101928994
FGF8	COL13A1
KCNIP2	AIFM2
PSD	SAR1A
C10orf95	ADAMTS14
TMEM180	UNC5B
AS3MT	UNC5B-AS1
NEURL1	C10orf54
SORCS3	CHST3
MXI1	DNAJB12
PDCD4-AS1	MCU
LOC103344931	PLA2G12B
HABP2	P4HA1
DCLRE1A	ECD
ADRB1	DNAJC9-AS1
WDR11-AS1	ANXA7
PSTK	PPP3CB
HMX3	PPP3CB-AS1
HMX2	C10orf55
FLJ37035	PLAU
C10orf90	VCL
FAM196A	ADK
LINC01163	KCNMA1
DPYSL4	DLG5-AS1
STK32C	POLR3A
LRRC27	LINC00856
LINC01166	ZMIZ1-AS1
ADGRA1-AS1	MBL1P
ADGRA1	ANXA11
LINC01001	LINC00857
SIRT3	GHITM
B4GALNT4	WAPL
DEAF1	MMRN2
BRSK2	SNCG
DUSP8	ADIRF
IGF2-AS	AGAP11
CD81-AS1	PAPSS2
KCNQ1	RNLS
CDKN1C	ANKRD22
SNORA54	FAS
ZNF195	CH25H
CCKBR	IFIT3
APBB1	SLC16A12
DCHS1	LINC00865
LOC100506258	HTR7
PPFIBP2	ANKRD1
RIC3	IDE
LMO1	CYP26C1
DENND5A	CYP26A1
LOC644656	MYOF
SNORD97	CEP55
LOC101928053	RBP4
PDE3B	SLC35G1
CALCB	PLCE1-AS1
SOX6	PDLIM1
NCR3LG1	TLL2
KCNJ11	PIK3AP1
KCNC1	C10orf12
PTPN5	EXOSC1
NAV2-AS4	ZDHHC16
LUZP2	ANKRD2
FIBIN	PI4K2A
BBOX1	AVPI1
LOC105376671	MARVELD1
BDNF-AS	SFRP5
MPPED2	R3HCC1L
ELP4	LOXL4
LINC00294	PYROXD2
LMO2	HPS1
LDLRAD3	MIR4685
TRAF6	ENTPD7
C11orf96	ABCC2
LOC101928812	ERLIN1
CRY2	SCD
MAPK8IP1	KAZALD1
PHF21A	GBF1
DGKZ	NFKB2
CHRM4	SFXN2
LRP4-AS1	NT5C2
LRP4	SH3PXD2A
MADD	SH3PXD2A-AS1
NDUFS3	OBFC1
C1QTNF4	SLK
FOLH1	COL17A1
LOC440040	SFR1
P2RX3	GSTO1
RTN4RL2	ITPRIP
YPEL4	CFAP58
OOSP1	LOC101927523
VWCE	SMNDC1
PPP1R32	DUSP5
LRRC10B	RBM20
DAGLA	SHOC2
ASRGL1	ACSL5
ZBTB3	VTI1A
TAF6L	PLEKHS1
RNU2-2P	CCDC186
SNORD22	FAM160B1
SNORD31	TRUB1
SNORD26	GFRA1
SNORD25	PNLIPRP3
CHRM1	CACUL1
RTN3	NANOS1
C11orf95	PRDX3
RCOR2	GRK5
MACROD1	RGS10
FLRT1	BAG3
KCNK4	SEC23IP
LOC100996455	WDR11
NRXN2	PLEKHA1
RASGRP2	ARMS2
TIGD3	HTRA1
SSSCA1-AS1	DMBT1
KCNK7	C10orf88
KAT5	CHST15
SNX32	OAT
GAL3ST3	LINC00601
CNIH2	CLRN3
B4GAT1	ADAM8
LRFN4	ECHS1
LOC100130987	BET1L
SUV420H1	RIC8A
SHANK2	IFITM2
ALG1L9P	IFITM1
ZNF705E	IFITM3
LRTOMT	PKP3
INPPL1	ANO9
CLPB	LRRC56
PDE2A	RASSF7
ATG16L2	IRF7
FCHSD2	EPS8L2
FAM168A	PNPLA2
PAAF1	CRACR2B
UCP3	CD151
MAP6	POLR2L
LOC100506127	TSPAN4
KCTD14	MUC6
NDUFC2	MUC2
GAB2	MUC5AC
LOC101928989	IFITM10
FAM181B	CTSD
PRCP	SYT8
PCF11	TSPAN32
DLG2	SLC22A18AS
CREBZF	PHLDA2
GRM5	OSBPL5
FAT3	NUP98
SLC36A4	RHOG
SNORA25	TRIM21
SNORA32	HBE1
SNORA1	TRIM6
SNORA8	FAM160A2
SNORD5	PRKCDBP
ANKRD49	SMPD1
FAM76B	MRPL17
ARHGAP42	GVINP1
TMEM133	CYB5R2
GRIA4	NLRP10
KBTBD3	AKIP1
ELMOD1	SCUBE2
SLN	SWAP70
ARHGAP20	LOC440028
COLCA1	ADM
COLCA2	AMPD3
TEX12	CTR9
LOC283140	EIF4G2
LOC101928847	MICAL2
NCAM1	PARVA
ANKK1	TEAD1
TMPRSS5	RRAS2
ZBTB16	COPB1
BACE1-AS	PSMA1
DSCAML1	INSC
FXYD6	C11orf58
SLC37A4	PLEKHA7
USP2	OR7E14P
USP2-AS1	NUCB2
TMEM136	TPH1
GRIK4	SAA2
TECTA	SAA1
LOC100507283	HPS5
ROBO3	GTF2H1
HEPN1	LDHA
HEPACAM	SPTY2D1
CCDC15	ZDHHC13
TMEM218	CSRP3
PKNOX2	E2F8
FEZ1	LOC100126784
LOC403312	NAV2-AS2
DDX25	HTATIP2
LOC101929653	FANCF
LOC646522	SVIP
MIR4697HG	BBOX1-AS1
JAM3	BDNF
VPS26B	KIF18A
THYN1	METTL15
ACAD8	DCDC5
GLB1L2	RCN1
B3GAT1	EIF3M
LOC283177	CCDC73
LOC100288778	PRRG4
SLC6A12	HIPK3
LOC101929384	CD59
NINJ2	CAPRIN1
RAD52	ABTB2
CACNA1C-AS2	ELF5
LOC283440	EHF
LOC100507424	APIP
PRMT8	LOC100507144
THCAT155	CD44
PARP11	PAMR1
CCND2-AS1	TRIM44
CCND2	API5
TIGAR	SEC14L1P1
GALNT8	ACCS
IFFO1	EXT2
CHD4	SLC35C1
ING4	MDK
PIANP	ATG13
PTMS	SLC39A13
GPR162	PTPRJ
LRRC23	TNKS1BP1
ENO2	SERPING1
PEX5	CLP1
FAM66C	ZDHHC5
RIMKLB	LPXN
A2ML1	LOC101927204
PHC1	STX3
KLRG1	TCN1
LOC642846	CCDC86
DDX12P	TMEM109
CLEC2D	SLC15A3
KLRC3	CD6
KLRAP1	VPS37C
TAS2R14	CYB561A3
TAS2R50	TMEM138
BCL2L14	RPLP0P2
LOH12CR2	FADS1
DUSP16	AHNAK
GPR19	GANAB
CDKN1B	LBHD1
KIAA1467	BSCL2
PTPRO	TMEM179B
ST8SIA1	HRASLS5
SOX5	LGALS12
ITPR2	RARRES3
KLHL42	PLA2G16
TSPAN11	ATL3
DDX11-AS1	STIP1
ALG10B	FERMT3
KIF21A	NUDT22
ABCD2	DNAJC4
SLC2A13	FKBP2
LRRK2	RPS6KA4
MUC19	CDC42BPG
YAF2	EHD1
MIR7851	NAALADL1
DBX2	ZNHIT2
LINC00938	CAPN1
ARID2	CDC42EP2
ENDOU	FRMD8
SLC48A1	NEAT1
PFKM	SCYL1
ASB8	LTBP3
CCDC184	FAM89B
KANSL2	EHBP1L1
LOC100506125	MAP3K11
RND1	SIPA1
DDN	CFL1
LMBR1L	EFEMP2
TUBA1A	FOSL1
PRPH	DRAP1
C1QL4	EIF1AD
KCNH3	CATSPER1
TMBIM6	PACS1
BCDIN3D-AS1	CD248
BCDIN3D	RIN1
FAIM2	BRMS1
LOC101927292	ZDHHC24
ASIC1	C11orf86
SMARCD1	RHOD
DIP2B	KDM2A
CSRNP2	POLD4
POU6F1	CLCF1
DAZAP2	PITPNM1
SLC4A8	CDK2AP2
ACVR1B	UNC93B1
GRASP	ALDH3B1
NR4A1	TCIRG1
MIR6757	MIR6753
AAAS	C11orf24
PCBP2-OT1	GAL
MAP3K12	MTL5
CISTR	MRGPRF
CBX5	MRGPRF-AS1
ZNF385A	TPCN2
NCKAP1L	MYEOV
NEUROD4	CCND1
TMEM198B	ORAOV1
ERBB3	ANO1-AS2
ZC3H10	ANO1
SMARCC2	FADD
CS	PPFIA1
PAN2	CTTN
TIMELESS	FAM86C1
ATP5B	ARAP1
SNORD59B	P2RY2
SNORD59A	P2RY6
HSD17B6	UCP2
RDH16	P4HA3
ZBTB39	PGM2L1
TAC3	KCNE3
NAB2	LIPT2
STAC3	XRRA1
R3HDM2	GDPD5
GLI1	SERPINH1
KIF5A	LRRC32
LOC101927583	TSKU
AGAP2	PAK1
LOC100129940	RAB30-AS1
MDM1	ANKRD42
LOC100507250	TMEM126A
CPSF6	PICALM
YEATS4	EED
FRS2	ME3
LRRC10	PRSS23
BEST3	LOC100506368
LOC101928002	CHORDC1
RAB3IP	CCDC67
MYRFL	SMCO4
LGR5	HEPHL1
THAP2	PANX1
ZDHHC17	FUT4
LINC00936	AMOTL1
C12orf79	LOC101929295
CLLU1OS	PGR
MIR3685	ANGPTL5
LOC643770	CEP126
ACTR6	YAP1
MYBPC1	BIRC3
PAH	BIRC2
ASCL1	TMEM123
C12orf73	MMP20
CHST11	MMP8
RFX4	MMP10
RIC8B	WTAPP1
MTERF2	MMP1
CRY1	MMP3
WSCD2	MMP12
SVOP	MMP13
USP30	DCUN1D5
ALKBH2	DYNC2H1
ACACB	PDGFD
FOXN4	LOC643733
FAM222A	CASP4
C12orf76	CASP5
IFT81	CASP1
ATP2A2	SLC35F2
ACAD10	CUL5
MAPKAPK5-AS1	KDELC2
MAPKAPK5	EXPH5
ADAM1A	DDX10
TMEM116	C11orf87
HECTD4	ZC3H12C
RPH3A	RDX
DTX1	FDX1
RASAL1	BTG4
LINC00173	LAYN
RNFT2	SIK2
HRK	PPP2R1B
FBXW8	HSPB2
FBXO21	DIXDC1
TAOK3	IL18
SRRM4	BCO2
PXN-AS1	PTS
CABP1	ZW10
SPPL3	NNMT
HNF1A	RBM7
P2RX7	REXO2
KDM2B	LINC00900
MIR548AQ	ZPR1
LINC01089	APOA5
BCL7A	APOA1
MLXIP	LOC100652768
LOC101593348	CEP164
KNTC1	MPZL3
HIP1R	MPZL2
RILPL1	ARCN1
LOC101927415	BCL9L
ATP6V0A2	DPAGT1
ZNF664	NLRX1
ZNF664-FAM101A	OAF
FAM101A	TBCEL
TMEM132C	BLID
GLT1D1	CLMP
SFSWAP	STT3A
DDX51	HYLS1
GALNT9	SRPR
FBRSL1	DCPS
POLE	ST3GAL4
PXMP2	KIRREL3
CHFR	LOC101929427
ZNF84	KIRREL3-AS3
ZNF891	FLI1
ZNF10	SENCR
TPTE2	C11orf45
PSPC1	TMEM45B
ZMYM2	ST14
CRYL1	ADAMTS8
IL17D	ADAMTS15
TNFRSF19	C11orf44
C1QTNF9B	LOC100507431
AMER2	SNX19
LINC00463	NTM
WASF3	LOC100049716
GPR12	LINC00942
GSX1	WNT5B
PAN3-AS1	ADIPOR2
UBL3	CACNA1C
B3GLCT	TSPAN9
FRY-AS1	CRACR2A
FRY	NTF3
ZAR1L	ANO2
N4BP2L1	VWF
N4BP2L2-IT2	PLEKHG6
NBEA	TNFRSF1A
LINC00437	SCNN1A
FREM2	LTBR
SLC25A15	TAPBPL
KBTBD6	MRPL51
LOC101929140	P3H3
KBTBD7	EMG1
NAA16	C1S
RGCC	C1R
VWA8-AS1	C1RL
TPT1-AS1	C1RL-AS1
CPB2-AS1	SLC2A14
KIAA0226L	FAM90A1
LINC00441	AICDA
CAB39L	MFAP5
MIR3613	M6PR
DLEU7-AS1	CLEC1A
LINC00371	CLEC7A
LINC00282	GABARAPL1
MRPS31P5	KLRD1
KLF12	STYK1
LINC00381	YBX3
LINC00347	SMIM10L1
EDNRB	ETV6
RNF219-AS1	CREBL2
POU4F1	DDX47
RBM26-AS1	MIR614
LINC01080	HTR7P1
LINC00377	GSG1
SLITRK1	EMP1
DCT	PLBD1
LOC101927248	HIST4H4
SOX21	H2AFJ
RAP2A	MGP
FARP1	ARHGDIB
CLYBL	LINC01489
PCCA	RERG
FGF14-IT1	EPS8
ARGLU1	STRAP
LINC00551	MGST1
LINC00443	PLEKHA5
MYO16	AEBP2
ANKRD10	PDE3A
ARHGEF7-AS2	RECQL
ARHGEF7	GOLT1B
TEX29	SPX
LINC00354	LMNTD1
LINC00403	RASSF8
SOX1	BHLHE41
ATP11A	SSPN
MCF2L-AS1	ASUN
MCF2L	STK38L
F7	ARNTL2
DCUN1D2	SMCO2
MIR548AR	PPFIBP1
CCNB1IP1	REP15
RNASE6	PTHLH
RNASE1	CCDC91
NDRG2	ERGIC2
MIR6717	LINC00941
TPPP2	FLJ13224
ZNF219	DENND5B-AS1
TMEM253	YARS2
LINC00641	PKP2
SALL2	GXYLT1
REM2	PRICKLE1
C14orf93	PLEKHA8P1
CDH24	ANO6
PPP1R3E	SLC38A2
SLC22A17	LOC100288798
CMTM5	AMIGO2
MYH6	PCED1B
MYH7	HDAC7
NGDN	VDR
JPH4	FKBP11
LRRC16B	TUBA1C
CPNE6	AQP5
NRL	ATF1
FITM1	SMAGP
NYNRIN	BIN2
SDR39U1	CELA1
NOVA1	GALNT6
LOC102724890	ACVRL1
LINC00645	KRT80
NPAS3	LINC00592
INSM2	KRT7
RALGAPA1	KRT81
BRMS1L	KRT86
LINC00609	KRT4
PNN	KRT79
KLHL28	KRT78
MDGA2	KRT8
KLHDC1	KRT18
ATP5S	SPRYD3
TRIM9	IGFBP6
TXNDC16	SOAT2
GPR137C	ITGB7
DDHD1	RARG
OTX2	PRR13
ARID4A	LOC100240735
DAAM1	NFE2
CCDC175	GPR84
RTN1	ITGA5
SIX6	TESPA1
TRMT5	RDH5
SPTB	ORMDL2
GPHN	MMP19
PLEKHH1	ESYT1
SMOC1	MYL6
LOC145474	IL23A
SIPA1L1	STAT2
RGS6	SPRYD4
MIR7843	RBMS2
ACOT6	STAT6
DNAL1	MIR616
ALDH6A1	OS9
LIN52	AGAP2-AS1
RPS6KL1	TSPAN31
JDP2	CYP27B1
GPATCH2L	METTL1
VASH1	METTL21B
LOC100506603	LOC101927653
ZDHHC22	LRIG3
NGB	USP15
POMT2	LINC01465
C14orf178	PPM1H
LOC100506700	AVPR1A
CALM1	C12orf56
TTC7B	RASSF3
SLC24A4	GNS
CHGA	WIF1
MOAP1	MSRB3
TMEM251	LOC100507065
UNC79	RPSAP52
COX8C	HMGA2
PRIMA1	LLPH
FAM181A-AS1	IRAK3
FAM181A	LOC100507195
DICER1-AS1	RAP1B
LOC730202	PTPRB
LINC00618	PTPRR
EVL	TSPAN8
CKB	TRHDE-AS1
TMEM179	TRHDE
MTA1	GLIPR1L1
C14orf80	GLIPR1
TMEM121	KRR1
MIR1268A	PHLDA1
HERC2P7	CSRP2
GOLGA8S	NAV3
MKRN3	PAWR
MAGEL2	PPP1R12A
GABRB3	PTPRQ
HERC2P9	PPFIA2
PDCD6IPP2	CCDC59
APBA2	METTL25
TJP1	LRRIQ1
OTUD7A	RASSF9
CHRNA7	TMTC3
LOC101928134	KITLG
RYR3	GALNT4
PGBD4	EPYC
SLC12A6	PLEKHG7
RASGRP1	LOC643339
DISP2	LOC102724933
BAHD1	FGD6
MRPL42P5	PGAM1P5
RAD51-AS1	NTN4
LTK	SNRPF
TYRO3	LTA4H
JMJD7	ELK3
PLA2G4B	LOC643711
GANC	SLC9A7P1
LRRC57	IKBIP
STARD9	ANO4
TTBK2	SLC5A8
ZSCAN29	ARL1
TUBGCP4	CHPT1
CKMT1B	DRAM1
CKMT1A	CCDC53
SERINC4	NUP37
LOC100419583	PMCH
TRIM69	NT5DC3
SHF	HSP90B1
SEMA6D	GLT8D2
MYEF2	TXNRD1
CTXN2	ALDH1L2
SECISBP2L	KIAA1033
FLJ10038	KCCAT198
GABPB1-AS1	C12orf75
MIR4712	CASC18
DMXL2	NUAK1
SCG3	CKAP4
LYSMD2	TMEM263
TMOD2	BTBD11
BCL2L10	PRDM4
LOC100129973	CMKLR1
PYGO1	SELPLG
PRTG	CORO1C
RFX7	USP30-AS1
LINC00926	KCTD10
ALDH1A2	MVK
FOXB1	FAM222A-AS1
RORA	TRPV4
VPS13C	ANKRD13A
C2CD4A	ARPC3
LOC102723344	VPS29
USP3	CCDC63
SNX22	MYL2
ANKDD1A	LINC01405
IGDCC3	SH2B3
IQCH-AS1	OAS1
C15orf61	OAS2
MAP2K5	PLBD2
SKOR1	SDSL
CALML4	LHX5
FEM1B	TBX3
CORO2B	HSPB8
ANP32A	CCDC60
MIR4312	PXN
ANP32A-IT1	RNF10
EWSAT1	OASL
CELF6	RHOF
HEXA-AS1	HPD
NPTN-IT1	PSMD9
C15orf59	CLIP1
C15orf59-AS1	DENR
LMAN1L	RILPL2
CPLX3	TMED2
ULK3	NCOR2
FAM219B	LINC00944
SCAMP5	SLC15A4
CSPG4	MMP17
SCAPER	GOLGA3
TSPAN3	ZMYM5
PEAK1	GJB2
LINC00597	GJB6
LINGO1	N6AMT2
LINGO1-AS1	LATS2
ACSBG1	ZDHHC20
LINC01314	MICU2
ARNT2	PARP4
ABHD17C	TPTE2P6
C15orf26	MTMR6
CPEB1-AS1	ATP8A2
AP3B2	RNF6
LOC338963	USP12
ACTG1P17	USP12-AS2
SCARNA15	RASL11A
EFTUD1P1	ATP5EP2
LOC101929679	FLT1
KLHL25	POMP
MIR1276	SLC46A3
ACAN	MTUS2
RLBP1	LINC00365
FANCI	ALOX5AP
LINC00925	LINC00398
PLIN1	MEDAG
IDH2	HSPH1
TTLL13P	STARD13
CRTC3-AS1	SPG20
MAN2A2	CCNA1
LOC101926911	SERTM1
LINC01578	LINC01048
LOC440311	LINC00571
LINC00924	UFM1
PCSK6	LHFP
TM2D3	COG6
SNRNP25	LINC01050
HBZ	EPSTI1
LUC7L	DNAJC15
RGS11	CCDC122
ARHGDIG	LACC1
PDIA2	SERP2
AXIN1	GTF2F2
LOC100134368	KCTD4
NME4	SLC25A30
RAB11FIP3	COG3
RAB40C	SPERT
WFIKKN1	SIAH3
FAM195A	LCP1
FBXL16	LINC00563
FAM173A	HTR2A
CCDC78	NUDT15
HAGHL	MED4
NARFL	ITM2B
PRR25	RCBTB2
LMF1	CYSLTR2
SOX8	FNDC3A
SSTR5	SETDB2
C1QTNF8	PHF11
CACNA1H	SPRYD7
BAIAP3	CCDC70
IFT140	ALG11
CRAMP1L	NEK5
MAPK8IP3	SUGT1
IGFALS	LECT1
NOXO1	DIAPH3
SYNGR3	MZT1
CASKIN1	KLF5
MLST8	CTAGE11P
BRICD5	TBC1D4
ECI1	UCHL3
ABCA3	LMO7-AS1
ABCA17P	LMO7
TBC1D24	LMO7DN-IT1
PRSS27	CLN5
PAQR4	FBXL3
LOC101929613	MYCBP2
ZSCAN10	SCEL
ZNF200	SLITRK6
TIGD7	LINC01040
ZSCAN32	GPC6-AS1
ZNF174	TGDS
NAA60	GPR180
NLRC3	ABCC4
TRAP1	DNAJC3
SRL	HS6ST3
LINC01569	MBNL2
TFAP4	STK24
CORO7	DOCK9
C16orf96	UBAC2-AS1
NAGPA-AS1	GPR183
ABAT	TM9SF2
SNN	NALCN-AS1
C16orf45	ITGBL1
XYLT1	KDELC1
COQ7	LINC00460
SYT17	EFNB2
KNOP1	FAM155A-IT1
GPRC5B	COL4A2
GPR139	RAB20
LOC81691	CARS2
METTL9	LINC00346
EEF2K	F10
SCNN1G	CUL4A
SCNN1B	LAMP1
COG7	LOC101928841
PRKCB	ADPRHL1
LOC554206	TMCO3
LCMT1-AS1	LINC00552
ZKSCAN2	TMEM255B
IL21R-AS1	GAS6
GSG1L	GAS6-AS2
SBK1	LINC00452
NPIPB6	LINC00565
CCDC101	SLC39A2
ATP2A1	RNASE7
MIR4517	RPGRIP1
MAZ	SLC7A7
PRRT2	LRP10
CDIPT-AS1	AJUBA
KCTD13	C14orf119
DOC2A	PSME1
FAM57B	PSME2
TBX6	IRF9
YPEL3	IPO4
ZNF48	TM9SF1
ITGAL	DHRS1
ZNF768	ADCY4
ZNF764	CBLN3
ZNF785	LINC01551
ZNF689	SCFD1
PRR14	STRN3
LOC730183	CFL2
ZNF629	SRP54
MIR762HG	PSMA6
STX1B	NFKBIA
KAT8	CLEC14A
PRSS8	LINC00639
ZNF843	SEC23A
GPT2	MIA2
ABCC11	LRFN5
SIAH1	RPL36AL
CBLN1	MGAT2
BRD7	ARF6
NKD1	LINC01588
LOC101927272	LINC01599
MIR548AI	SAV1
SALL1	FRMD6
IRX6	FRMD6-AS1
SLC6A2	PTGER2
LOC283856	ERO1A
GNAO1	STYX
DKFZP434H168	GNPNAT1
BBS2	CDKN3
MT3	GCH1
MT1G	KTN1-AS1
CPNE2	KTN1
FAM192A	LINC00520
PLLP	C14orf105
CIAPIN1	ACTR10
COQ9	PSMA3
ADGRG1	DACT1
ADGRG3	SIX4
NDRG4	MNAT1
SNORA76A	TMEM30B
BEAN1	PRKCH
BEAN1-AS1	LOC101927780
CMTM2	FLJ22447
CES3	HIF1A
HSF4	SNAPC1
KIAA0895L	RHOJ
HSD11B2	ESR2
GFOD2	HSPA2
TSNAXIP1	PPP1R36
CENPT	FNTB
NRN1L	LOC100128233
PRMT7	FUT8
SMPD3	FUT8-AS1
TANGO6	ATP6V1D
TERF2	ACTN1
PDPR	ACTN1-AS1
SMG1P7	SUSD6
MTSS1L	MAP3K9
HYDIN	PAPLN
ZNF19	NUMB
TAT-AS1	C14orf169
MARVELD3	ACOT4
ZNF821	NPC2
DHODH	LTBP2
PMFBP1	FCF1
LINC01572	PGF
LOC283922	ZC2HC1C
FA2H	NEK9
ZFP1	C14orf1
TMEM170A	TGFB3
CHST5	SLIRP
TMEM231	SNW1
GABARAPL2	DIO2
MIR4720	SEL1L
HSBP1	FLRT2
MLYCD	GPR65
NECAB2	FOXN3-AS1
SLC38A8	KCNK13
HSDL1	PSMC1
ATP2C2	GPR68
GINS2	TRIP11
JPH3	GOLGA5
CBFA2T3	ASB2
LINC00304	LINC00521
CDH15	IFI27
SPATA2L	IFI27L2
ZNF276	PPP4R4
SPIRE2	SERPINA5
DEF8	LINC00341
RPH3AL	SYNE3
TUSC5	GLRX5
RTN4RL1	BDKRB2
SRR	BDKRB1
SPATA22	SETD3
ARRB2	CCNK
ENO3	CCDC85C
LOC102724009	HHIPL1
ZNF232	EML1
RPAIN	YY1
LOC728392	WARS
WSCD1	LINC00239
C17orf100	DYNC1H1
MIR4520-2	TRAF3
ALOX15P1	AMN
TEKT1	EXOC3L4
MIR497HG	TNFAIP2
ASGR1	LINC00605
DLG4	EIF5
SLC2A4	INF2
YBX2	AHNAK2
NLGN2	CDCA4
FGF11	CRIP1
SAT2	OCA2
ATP1B2	SCG5
EFNB3	AVEN
KDM6B	ACTC1
LOC284023	C15orf41
KCNAB3	LOC145845
HES7	MEIS2
VAMP2	C15orf54
LINC00324	THBS1
CTC1	GPR176
LOC100128288	EIF2AK4
KRBA2	SRP14
LOC101928266	C15orf56
CFAP52	ANKRD63
USP43	PLCB2
MYH3	C15orf52
PIRT	GCHFR
SHISA6	C15orf62
ZNF18	ZFYVE19
TBC1D26	SPINT1
ZSWIM7	RHOV
LRRC75A	EHD4
ZNF287	SNAP23
ZNF624	CCNDBP1
NT5M	TGM5
MED9	PDIA3
TBC1D28	B2M
ZNF286B	FBN1
FOXO3B	COPS2
SNORD3A	FGF7
EPN2	DTWD1
EPN2-AS1	ATP8B4
SLC47A2	SPPL2A
CCDC144CP	AP4E1
FAM106B	TNFAIP8L3
MTRNR2L1	TMOD3
WSB1	UNC13C
KSR1	RAB27A
NOS2	PIGB
LYRM9	CCPG1
NLK	NEDD4
KRT18P55	LOC145783
TMEM199	CGNL1
SARM1	RNF111
UNC119	MYO1E
SGK494	MIR2116
PROCA1	GCNT3
SNORD42B	GTF2A2
SNORD4A	BNIP2
SNORD4B	ANXA2
TRAF4	TLN2
FAM222B	TPM1
FLOT2	LACTB
DHRS13	DAPK2
ANKRD13B	PPIB
LRRC37BP1	RASL12
SUZ12P1	RAB11A
OMG	ZWILCH
LRRC37B	LCTL
SH3GL1P1	SMAD6
RHOT1	SMAD3
RHBDL3	AAGAB
CDK5R1	ITGA11
CCT6B	NOX5
RASL10B	SPESP1
GAS2L2	PAQR5
TADA2A	UACA
GPR179	LARP6
SOCS7	GRAMD2
SRCIN1	PKM
C17orf96	HEXA
MLLT6	ADPGK
PIP4K2B	ADPGK-AS1
LOC100131347	NPTN
CACNB1	LOXL1-AS1
STAC2	LOXL1
FBXL20	PML
NEUROD2	LOC283731
TCAP	ISLR2
PGAP3	ISLR
LRRC3C	STRA6
THRA	CCDC33
MSL1	CYP11A1
CASC3	LOC729739
KRT20	SNUPN
HAP1	TBC1D2B
NT5C3B	DNAJA4
KLHL11	CRABP1
TTC25	HYKK
KAT2A	PSMA4
KCNH4	ADAMTS7
STAT5B	MORF4L1
ATP6V0A1	CTSH
MIR5010	RASGRF1
PLEKHH3	TMED3
CCR10	KIAA1024
EZH1	MTHFS
RAMP2-AS1	ST20-AS1
RAMP2	FAH
CNTD1	MESDC2
RND2	MESDC1
LOC101929767	STARD5
LINC00854	TMC3-AS1
MPP2	RPS17
HDAC5	WHAMM
ASB16	HOMER2
RUNDC3A-AS1	FAM103A1
RUNDC3A	TM6SF1
FAM171A2	BNC1
ITGA2B	LINC00933
ADAM11	SEC11A
HEXIM2	ALPK3
MGC57346	PDE8A
CRHR1-IT1	LINC00052
CRHR1	MESP2
MAPT-AS1	ANPEP
SPPL2C	CIB1
MAPT	GABARAPL3
MAPT-IT1	ZNF774
STH	IQGAP1
KANSL1	FURIN
WNT3	FES
WNT9B	RCCD1
RPRML	SLCO3A1
THCAT158	ST8SIA2
TBKBP1	C15orf32
TBX21	FAM174B
SP6	LINC01581
ZNF652	MCTP2
LOC102724596	ALDH1A3
NXPH3	CHSY1
KAT7	VIMP
FLJ45513	MSLN
SAMD14	TPSG1
HILS1	TMEM204
CHAD	HN1L
RSAD1	SLC9A3R2
CACNA1G	LOC652276
LUC7L3	ZG16B
TOB1-AS1	PRSS22
MBTD1	FLYWCH2
CA10	TNFRSF12A
HLF	HCFC1R1
ANKFN1	CCDC64B
MSI2	MMP25
LOC101927666	IL32
BZRAP1	LOC102724927
BZRAP1-AS1	VASN
SEPT4	HMOX2
TEX14	PPL
PPM1E	NAGPA
TRIM37	ALG1
MIR454	PMM2
GDPD1	C16orf72
PPM1D	TVP23A
KCNH6	SOCS1
DCAF7	CPPED1
STRADA	SHISA9
AMZ2P1	PARN
AXIN2	BFAR
C17orf58	PDXDC1
LOC440461	NTAN1
ABCA8	MYH11
KCNJ16	FOPNL
CASC17	ABCC1
SOX9-AS1	ITPRIPL2
LOC101928205	CLEC19A
SOX9	THUMPD1
LINC00673	ACSM3
SDK2	DCUN1D3
TTYH2	SLC7A5P2
DNAI2	PDZD9
KIF19	C16orf52
BTBD17	CDR2
USH1G	RRN3P3
MIF4GD	UBFD1
KIAA0195	ARHGAP17
UNK	IL4R
TEN1-CDK3	IL21R
FOXJ1	LAT
RNF157-AS1	SNX29P2
RNF157	NPIPB11
UBALD2	SLC7A5P1
SEC14L1	C16orf54
SNHG20	MVP
TNRC6C	CTF1
CBX2	ORAI3
CBX8	STX4
CBX4	VKORC1
LOC101928766	BCKDK
TBC1D16	PYCARD
CCDC40	ITGAM
SLC26A11	ITGAX
LOC100294362	TGFB1I1
MIR4730	ZNF267
AATK	ANKRD26P1
MIR1250	SHCBP1
AATK-AS1	ZNF423
LOC100130370	ADCY7
FAM195B	CYLD
RAC3	FTO-IT1
TEX19	IRX3
TYMSOS	MMP2
TYMS	LPCAT2
YES1	OGFOD1
CBX3P2	MT2A
EMILIN2	MT1L
LPIN2	MT1E
MYOM1	MT1A
TGIF1	SLC12A3
DLGAP1	HERPUD1
DLGAP1-AS3	NLRC5
LINC00526	USB1
ZBTB14	CDH11
ANKRD12	LINC00922
LINC01254	RRAD
MPPE1	CES4A
SLMO1	C16orf70
SPIRE1	TRADD
CEP192	FHOD1
RNMT	PLEKHG4
MC5R	NUTF2
ZNF519	PSMB10
GREB1L	PLA2G15
ABHD3	CDH3
MIB1	HAS3
LOC729950	CIRH1A
ZNF521	SNTB2
AQP4	PDF
AQP4-AS1	NIP7
CHST9	CYB5B
NOL4	NFAT5
DTNA	NQO1
ZNF397	EXOSC6
ZNF24	ST3GAL2
RPRD1A	IL34
SLC39A6	CALB2
CELF4	CHST4
RIT2	HP
SYT4	TXNL4B
ATP5A1	ZFHX3
RNF165	C16orf47
LOXHD1	PSMD7
PIAS2	MLKL
KATNAL2	BCAR1
HDHD2	SYCE1L
SNHG22	VAT1L
SCARNA17	LOC102724084
CXXC1	CDYL2
MRO	PKD1L2
POLI	BCO1
TCF4	PLCG2
LINC01416	SDR42E1
ST8SIA3	HSD17B2
ONECUT2	MBTPS1
OACYLP	KCNG4
SEC11C	TLDC1
CDH20	COTL1
ZCCHC2	KLHL36
PHLPP1	ZDHHC7
BCL2	FAM92B
CDH7	LOC400548
DSEL	LINC00311
CCDC102B	FENDRR
FAM69C	FOXC2
CNDP1	FOXL1
LINC00909	SLC7A5
ZADH2	LOC101928880
GALR1	CYBA
SALL3	SNAI3
ATP9B	PIEZO1
KCNG2	LOC100287036
RBFA	VPS9D1-AS1
RBFADN	MYO1C
ADNP2	RILP
PARD6G-AS1	TLCD2
C2CD4C	MIR22HG
SHC2	HIC1
PALM	TSR1
LPPR3	LOC101927911
AZU1	TRPV3
R3HDM4	EMC6
KISS1R	C17orf107
WDR18	GP1BA
CBARP	PFN1
ATP5D	KIF1C
MIDN	DERL2
CIRBP	NLRP1
EFNA2	AIPL1
MUM1	XAF1
NDUFS7	SLC16A13
APC2	SLC16A11
PCSK4	CLDN7
PLK5	EIF5A
TCF3	ACAP1
ABHD17A	KCTD11
BTBD2	TNK1
DOT1L	TMEM102
PLEKHJ1	CHRNB1
LINGO3	CD68
LSM7	CYB5D1
SPPL2B	TRAPPC1
TMPRSS9	C17orf59
GNG7	NDEL1
DIRAS1	PIK3R6
ZNF554	SCO1
ZNF555	TMEM220
ZNF57	MAGOH2P
ZNF77	MYOCD
TLE6	PMP22
TLE2	MIR4731
AES	TVP23C
CELF5	TRIM16
ZFR2	MEIS3P1
ATCAY	ADORA2B
SHD	UBB
TMIGD2	TRPV2
FSD1	MPRIP
MPND	COPS3
PLIN5	RASD1
MIR7-3HG	TOM1L2
KDM4B	LRRC48
PTPRS	ALKBH5
HSD11B1L	FLII
NRTN	SMCR8
FUT3	SHMT1
LOC100128568	TRIM16L
RFX2	TVP23B
CLPP	SLC5A10
ALKBH7	FAM83G
PSPN	MAP2K3
KHSRP	KCNJ12
SLC25A23	LGALS9
TUBB4A	RAB34
ZNF557	CRYBA1
INSR	CPD
LOC100128573	RNF135
C19orf45	DPRXP4
ZNF358	EVI2B
CAMSAP3	UTP6
PRR36	PSMD11
CTXN1	MYO1D
TIMM44	ASIC2
ELAVL1	CCL2
CCL25	CCL7
FBN3	CCL11
NDUFA7	CCL8
KANK3	CCL1
RAB11B	C17orf102
PRAM1	TMEM132E
ZNF414	RFFL
ZNF558	FNDC8
ZNF317	SLFN5
OR7D2	SLFN12
ZNF559	SLFN13
ZNF559-ZNF177	SLFN12L
ZNF266	CCL5
ZNF121	MYO19
ZNF562	HNF1B
ZNF846	ARHGAP23
PPAN	LASP1
ZGLP1	CDK12
PDE4A	GRB7
S1PR5	IKZF3
ATG4D	CSF3
KRI1	GJD3
ILF3-AS1	KRT39
ILF3	KRTAP2-3
SMARCA4	KRT32
DOCK6	KRT13
C19orf80	KRT15
CCDC159	KRT19
CCDC151	KRT9
ELAVL3	KRT14
ZNF653	KRT16
ECSIT	KRT17
ZNF627	JUP
ZNF833P	DNAJC7
ZNF441	STAT5A
ZNF491	PTRF
ZNF440	IFI35
ZNF439	TMEM106A
ZNF700	MEOX1
ZNF763	DUSP3
ZNF433	NAGS
ZNF878	GRN
ZNF844	NMT1
ZNF625-ZNF20	FMNL1
ZNF625	MAP3K14
ZNF136	ARHGAP27
LOC100289333	PLEKHM1
ZNF442	NSF
ZNF799	GOSR2
ZNF443	CDC27
ZNF709	ITGB3
ZNF564	KPNB1
ZNF490	COPZ2
WDR83	NFE2L1
DHPS	SKAP1
TNPO2	THRA1/BTR
ASNA1	LOC101927166
HOOK2	HOXB2
PRDX2	HOXB3
RTBDN	HOXB4
MAST1	HOXB-AS3
KLF1	HOXB5
SYCE2	HOXB6
CCDC130	HOXB8
NANOS3	HOXB9
C19orf57	MIR196A1
CC2D1A	PRAC2
DCAF15	CALCOCO2
IL27RA	UBE2Z
PALM3	SNF8
LOC113230	GIP
SAMD1	IGF2BP1
ADGRL1	LOC284080
DDX39A	ITGA3
ZNF333	COL1A1
ADGRE2	LOC101927230
SLC1A6	TMEM92
ILVBL	TMEM92-AS1
NOTCH3	LRRC59
AKAP8L	EPN3
CYP4F12	SPATA20
CYP4F24P	ABCC3
CHERP	WFIKKN2
TMEM38A	TOM1L1
HAUS8	PCTP
MYO9B	NOG
USHBP1	TRIM25
ANO8	SCPEP1
UNC13A	RNF43
FCHO1	CLTC
RPL18A	PTRH2
KCNN1	VMP1
MAST3	WFDC21P
PIK3R2	CA4
RAB3A	C17orf82
JUND	TLK2
PGPEP1	MRC2
SSBP4	MARCH2
TMEM59L	CYB561
CRTC1	ACE
CERS1	MAP3K3
DDX49	FTSJ3
SUGP2	PSMC5
RFXANK	SMARCD2
NR2C2AP	ICAM2
NCAN	TEX2
HAPLN4	PECAM1
TM6SF2	MILR1
TSSK6	SMURF2
PBX4	LOC100507002
GMIP	RGS9
ZNF101	PSMD12
ZNF14	NOL11
LINC00663	SLC16A6
ZNF253	PRKAR1A
ZNF682	WIPI1
ZNF737	MIR635
ZNF85	FAM20A
ZNF431	ABCA9
ZNF708	ABCA6
ZNF738	LINC01483
ZNF493	SSTR2
ZNF429	COG1
ZNF100	SLC9A3R1
ZNF43	CDR2L
ZNF724P	SLC16A5
IPO5P1	ITGB4
ZNF91	SRP68
ZNF675	GALR2
ZNF254	SPHK1
UQCRFS1	RHBDF2
VSTM2B	CYGB
DPY19L3	ST6GALNAC2
RGS9BP	ST6GALNAC1
LRP3	MXRA7
CEBPA	MGAT5B
CEBPA-AS1	LOC100507351
CEBPG	TNRC6C-AS1
CHST8	SYNGR2
KCTD15	TK1
KIAA0355	SOCS3
PDCD2L	LOC101928674
UBA2	PGS1
SCGB1B2P	USP36
SCGB2B2	LGALS3BP
ZNF302	CANT1
ZNF181	C1QTNF1
ZNF599	RBFOX3
ZNF30-AS1	RNF213
ZNF30	CHMP6
ZNF792	C17orf89
GRAMD1A	SLC38A10
FXYD7	ACTG1
USF2	FSCN2
TMEM147-AS1	NPLOC4
TMEM147	TSPAN10
HAUS5	PDE6G
ETV2	CCDC137
COX6B1	HGS
KMT2B	SLC25A10
IGFLR1	P4HB
U2AF1L4	ARHGDIA
ARHGAP33	DUS1L
SDHAF1	SLC16A3
CLIP3	OGFOD3
WDR62	RAB40B
POLR2I	USP14
ZNF565	COLEC12
LINC00665	CLUL1
ZFP14	MYL12A
ZNF566	MYL12B
LOC728752	DLGAP1-AS2
ZNF260	TMEM200C
ZNF529	ARHGAP28
ZNF382	GACAT2
ZNF461	MTCL1
LINC01534	TWSG1
ZNF567	RALBP1
ZNF850	PIEZO2
LOC728485	CIDEA
ZNF790	TUBB6
ZNF345	PTPN2
ZNF568	ANKRD20A5P
ZNF420	ANKRD30B
ZNF585A	LINC01444
ZNF585B	GATA6-AS1
ZNF383	GATA6
HKR1	CABLES1
ZNF527	RIOK3
ZNF570	NPC1
ZNF571-AS1	ANKRD29
ZNF540	LAMA3
ZNF571	CABYR
ZFP30	DSC2
ZNF781	DSC1
ZNF607	DSG3
ZNF573	CCDC178
DPF1	INO80C
CATSPERG	MOCOS
FAM98C	TPGS2
RYR1	SLC14A1
MAP4K1	SIGLEC15
SIRT2	PSTPIP2
CCER2	SMAD7
SARS2	RPL17
LRFN1	LIPG
TIMM50	LOC100287225
DLL3	MBD2
SELV	RAB27B
EID2B	CCDC68
EID2	LOC101927229
ZNF780B	FECH
ZNF780A	ATP8B1
MAP3K10	ALPK2
TTC9B	LOC101927322
CNTD2	MALT1
AKT2	LMAN1
MIR641	PMAIP1
ADCK4	MC4R
C19orf54	RNF152
SNRPA	VPS4B
CCDC97	SERPINB7
TMEM91	SERPINB8
BCKDHA	LOC101060542
ATP5SL	LOC100505817
ATP1A3	LINC00683
GSK3A	MBP
ERF	HSBP1L1
PAFAH1B3	FSTL3
TMEM145	MISP
LIPE-AS1	CNN2
IRGQ	SBNO2
ZNF428	CIRBP-AS1
CADM4	DAZAP1
LYPD5	ADAMTSL5
ZNF45	ATP8B3
ZNF221	MKNK2
ZNF155	GADD45B
LOC101928063	GNA15
ZNF230	LOC100996351
ZNF222	MFSD12
ZNF223	ZBTB7A
ZNF284	EBI3
ZNF224	STAP2
ZNF225	LRG1
ZNF234	MYDGF
ZNF226	DPP9
ZNF227	PLIN3
ZNF235	TNFSF9
ZNF112	CD70
ZNF285	TNFSF14
ZNF180	C3
APOE	SH2D3A
ZNF296	ADGRE1
NKPD1	STXBP2
TRAPPC6A	LRRC8E
MARK4	MUC16
RTN2	COL5A3
GIPR	ICAM1
FBXO46	ICAM4
IRF2BP1	ICAM3
MYPOP	AP1M2
NANOS2	LDLR
NOVA2	CNN1
CCDC61	BEST2
PPP5C	CALR
PNMAL1	LYL1
PPP5D1	IER2
PNMAL2	CACNA1A
CALM3	LOC284454
GNG8	MIR23A
DACT3	PODNL1
DACT3-AS1	PTGER1
STRN4	SYDE1
ARHGAP35	RASAL3
ZC3H4	TPM4
[truncated: 2,401 more rows]
