# Supplementary material for: NF1 regulates mesenchymal glioblastoma plasticity and aggressiveness through the AP-1 transcription factor FOSL1
Source: eLife. 2021 Aug 17;10:e64846. doi: 10.7554/eLife.64846 (PMC8370767; doi:10.7554/eLife.64846)
Supplement: Supplementary file 6. [file elife-64846-supp6.xlsx]

## Sheet: Table_S6
# Supplementary File 6: Primers used in this study
Primer	Species	Sequence	Application	Notes
GAPDH_f	Human	ATGGGGAAGGTGAAGGTCG	RT-qPCR
GAPDH_r	Human	GGGGTCATTGATGGCAACAATA	RT-qPCR
18s_f	Human	CGCCGCTAGAGGTGAAATTC	RT-qPCR
18s_r	Human	CTTTCGCTCTGGTCCGTCTT	RT-qPCR
FOSL1-a_f	Human	CAGGCGGAGACTGACAAACTG	RT-qPCR	Figure 2
FOSL1-a_r	Human	TCCTTCCGGGATTTTGCAGAT	RT-qPCR	Figure 2
BHLHB2_f	Human	CAGCAGCAGAAAATCATTGC	RT-qPCR
BHLHB2_r	Human	TTCAGGTCCCGAGTGTTCTC	RT-qPCR
FOSL2_f	Human	CAGAAATTCCGGGTAGATATGCC	RT-qPCR
FOSL2_r	Human	GGTATGGGTTGGACATGGAGG	RT-qPCR
RUNX1_f	Human	CCCATCGCTTTCAAGGTG	RT-qPCR
RUNX1_r	Human	TGGTCAGAGTGAAGCTTTTCC	RT-qPCR
TAZ_f	Human	CGGGATTTGTCAGCCAAG	RT-qPCR
TAZ_r	Human	GAGGCCGGATTCATCTTCTGG	RT-qPCR
ITGA3_f	Human	CCGATTCCTGGTAGTGAAGGAG	RT-qPCR
ITGA3_r	Human	GTTGGTGTAGCCATCGGGC	RT-qPCR
ITGA5_f	Human	GTCGGGGGCTTCAACTTAGAC	RT-qPCR
ITGA5_r	Human	CCTGGCTGGCTGGTATTAGC	RT-qPCR
PLAU_f	Human	CTACACAAGGACTACAGCGC	RT-qPCR
PLAU_r	Human	GCAGATGGTCTGTATAGTCCG	RT-qPCR
SERPINE1-a_f	Human	AGTCCCAGAGAGGGAGGTGT	RT-qPCR	Figure 2-figure supplement 2
SERPINE1-a_r	Human	TCTTCTTGACAGCGCTCTTG	RT-qPCR	Figure 2-figure supplement 2
TNC_f	Human	GCACACAGTAGATGGGGAAAA	RT-qPCR
TNC_r	Human	CAGCAGCTCCTTAACATCAGG	RT-qPCR
FOSL1-b_f	Human	CGAAGGCCTTGTGAACAGA	RT-qPCR	Figure 7-figure supplement 1
FOSL1-b_r	Human	GTTCCTTCCTCCGGTTCCT	RT-qPCR	Figure 7-figure supplement 1
TIMP1_f	Human	GGGCTTCACCAAGACCTACA	RT-qPCR
TIMP1_r	Human	TGCAGGGGATGGATAAACAG	RT-qPCR
FN1_f	Human	GACGCATCACTTGCACTTCT	RT-qPCR
FN1_r	Human	GCAGGTTTCCTCGATTATCCT	RT-qPCR
VIM_f	Human	GATTCACTCCCTCTGGTTGATAC	RT-qPCR
VIM_r	Human	GTCATCGTGATGCTGAGAAGT	RT-qPCR
CD44_f	Human	GACACCATGGACAAGTTTTGG	RT-qPCR
CD44_r	Human	CGGCAGGTTATATTCAAATCG	RT-qPCR
S100A4_f	Human	ATGAGCAACTTGGACAGCAACAGG	RT-qPCR
S100A4_r	Human	TACACATCATGGCGATGCAGGACA	RT-qPCR
CTGF_f	Human	CCTGCAGGCTAGAGAAGCAG	RT-qPCR
CTGF_r	Human	TGGAGATTTTGGGAGTACGG	RT-qPCR
SERPINE1-b_f	Human	CCAGCTGACAACAGGAGGAG	RT-qPCR	Figure 7-figure supplement 1
SERPINE1-b_r	Human	CCCATGAGCTCCTTGTACAGAT	RT-qPCR	Figure 7-figure supplement 1
STAT3_f	Human	CAGGAGGGAGCTGTATCAGG	RT-qPCR
STAT3_r	Human	AGGACTTGGGCACAGAAGC	RT-qPCR
OLIG2_f	Human	CGCAACTACATCCTCATGCT	RT-qPCR
OLIG2_r	Human	TAGATCTCGCTCACCAGTCG	RT-qPCR
NCAM1_f	Human	TTACCGCGGCAAGAACAT	RT-qPCR
NCAM1_r	Human	CCACCTGCAGAGAAACTGC	RT-qPCR
ASCL1_f	Human	CGACTTCACCAACTGGTTCTG	RT-qPCR
ASCL1_r	Human	ATGCAGGTTGTGCGATCA	RT-qPCR
DLL3_f	Human	CAACTGTGAGAAGAGGGTGGA	RT-qPCR
DLL3_r	Human	CCAGGTCCAGGCAGAGTC	RT-qPCR
hNanog_ChIP_TSS_Fw	Human	TGGGTTTGTCTTCAGGTTCTG	ChIP-PCR
hNanog_ChIP_TSS_Rv	Human	CTACTGACCCACCCTTGTGAA	ChIP-PCR
PLAU_FOSL1ChIP_f	Human	AAGGGGAGAAAGGGTGTCACGCTT	ChIP-PCR
PLAU_FOSL1ChIP_f	Human	CAGCCTGAGGACTTACCCCGAAAC	ChIP-PCR
ITGA5_FOSL1ChIP_f	Human	GCGGGCTCAGAGTTCCAG	ChIP-PCR
ITGA5_FOSL1ChIP_r	Human	CGCTTCCTAAACCTCCCAGA	ChIP-PCR
CD44_FOSL1ChIP_f	Human	GCAGCCCCGATTATTTACAG	ChIP-PCR
CD44_FOSL1ChIP_r	Human	CCCGCAGAGGTTTTAAGAAGT	ChIP-PCR
TNC_FOSL1ChIP_f	Human	CATGCTAACCACCAAACGAA	ChIP-PCR
TNC_FOSL1ChIP_r	Human	GGGGAAGGATTTCTGAGGTT	ChIP-PCR
Gapdh_f	Mouse	CGTCCCGTAGACAAAATGGT	RT-qPCR
Gapdh_r	Mouse	TCAATGAAGGGGTCGTTGAT	RT-qPCR
Fosl1_f	Mouse	AACCGAAGAAAGGAGCTGAC	RT-qPCR
Fosl1_r	Mouse	GCCCCGATTTCTCATCCTCC	RT-qPCR
Plau_f	Mouse	CCTTCAGAAACCCTACAATGCC	RT-qPCR
Plau_r	Mouse	CAAACTGCCTTAGGCCAATCT	RT-qPCR
Plaur_f	Mouse	CAGAGCTTTCCACCGAATGG	RT-qPCR
Plaur_r	Mouse	GTCCCCGGCAGTTGATGAG	RT-qPCR
Timp1_f	Mouse	CTTGGTTCCCTGGCGTACTC	RT-qPCR
Timp1_r	Mouse	ACCTGATCCGTCCACAAACAG	RT-qPCR
Cd44_f	Mouse	GACACCATGGACAAGTTTTGG	RT-qPCR
Cd44_r	Mouse	CGGCAGGTTATATTCAAATCG	RT-qPCR
Itga7_f	Mouse	CTGCTGTGGAAGCTGGGATTC	RT-qPCR
Itga7_r	Mouse	CTCCTCCTTGAACTGCTGTCG	RT-qPCR
Fn1_f	Mouse	GCAGTGACCACCATTCCTG	RT-qPCR
Fn1_r	Mouse	GGTAGCCAGTGAGCTGAACAC	RT-qPCR
Cyr61_f	Mouse	CTGCGCTAAACAACTCAACGA	RT-qPCR
Cyr61_r	Mouse	GCAGATCCCTTTCAGAGCGG	RT-qPCR
Actn1_f	Mouse	GACCATTATGATTCCCAGCAGAC	RT-qPCR
Actn1_r	Mouse	CGGAAGTCCTCTTCGATGTTCTC	RT-qPCR
S100a4_f	Mouse	TGAGCAACTTGGACAGCAACA	RT-qPCR
S100a4_r	Mouse	TTCCGGGGTTCCTTATCTGGG	RT-qPCR
Vim_f	Mouse	GTGCGCCAGCAGTATGAAAG	RT-qPCR
Vim_r	Mouse	GCATCGTTGTTCCGGTTGG	RT-qPCR
Olig2_f	Mouse	AGACCGAGCCAACACCAG	RT-qPCR
Olig2_r	Mouse	AAGCTCTCGAATGATCCTTCTTT	RT-qPCR
Ncam1_f	Mouse	TTACCGCGGCAAGAACAT	RT-qPCR
Ncam1_r	Mouse	CCACCTGCAGAGAAACTGC	RT-qPCR
Dll3_f	Mouse	ATCTGTGTGCCCCATGAAAGT	RT-qPCR
Dll3_r	Mouse	CTGTCCCCCAAAGCAATGGT	RT-qPCR
Bcan_f	Mouse	GTACCCCGGAGGCCTGTC	RT-qPCR
Bcan_r	Mouse	CAGCCCATCCTCTGGAGCTA	RT-qPCR
Lgr5_f	Mouse	CTTCACTCGGTGCAGTGCT	RT-qPCR
Lgr5_r	Mouse	CAGCCAGCTACCAAATAGGTG	RT-qPCR
SpeI-Flag-NF1-GRD-Forward	NA	TGGACTAGTATGGACTACAAGGACGACGATGACAAGGATCTCCAGACAAGAGCTACA	Cloning
PmeI-NF1-GRD-Reverse	NA	GCCTTGGTTTAAACTTACCAGTGTGTATCTGCCACAGGT	Cloning
