# Supplementary figures and images for: NF1 regulates mesenchymal glioblastoma plasticity and aggressiveness through the AP-1 transcription factor FOSL1
Source: eLife journal article supplement (doi:10.7554/elife.64846), 2021-08-10

Figure 2-source data 1

F

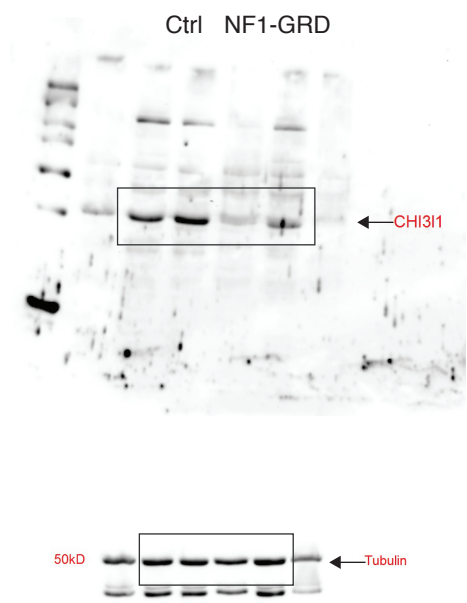

Supplement: fig2-data1 [file elife-64846-fig2-data1-v1.ai]

Figure 2-figure supplement 1-source data 2

C

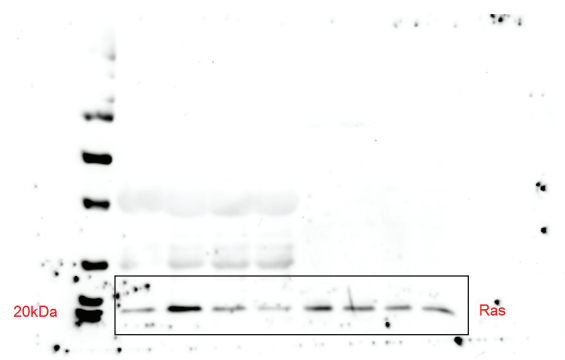

Supplement: fig2-figsupp1-data2 [file elife-64846-fig2-figsupp1-data2-v1.ai]
